# Supplementary material for: Genome-Wide Testing of Putative Functional Exonic Variants in Relationship with Breast and Prostate Cancer Risk in a Multiethnic Population
Source: PLoS Genet. 2013 Mar 28;9(3):e1003419. doi: 10.1371/journal.pgen.1003419 (PMC3610631; doi:10.1371/journal.pgen.1003419)
Supplement: Table S1 — One hundred most significant single SNP associations with breast cancer; over all ethnic groups (S1.1) and by ethnic group (S1.2–6). (XLSX) [file pgen.1003419.s003.xlsx]

## Sheet: Sheet1
Supplemental Table S1: One Hundred Most Significant Single SNP Associations with Breast Cancer; Over all Ethnic Groups (S1.1) and by Ethnic Group (S1.2-6)
S1.1 Overall
							Overall					African American				Native Hawaiian				Japanese American				Latino				European American
SNP	Chr	Position	SNP ID	A1/A2	Gene	Type	No. of samples	MAF	OR	P	P_Het	No. of samples	MAF	OR	P	No. of samples	MAF	OR	P	No. of samples	MAF	OR	P	No. of samples	MAF	OR	P	No. of samples	MAF	OR	P
exm-rs4784227	16	52599188	rs4784227	T/C	TOX3	other/GWAS	10518	0.206261	1.268	6e-11	0.049	2737	0.08038	1.26	0.041	609	0.3186	1.183	0.19	2820	0.2266	1.256	0.00084	1916	0.2938	1.34	7.7e-05	2436	0.2482	1.268	0.00055
exm61019	1	54476084	rs145889899	T/C	LDLRAD1	SP	10528	0.00185553	3.743	2.5e-07	0.037	2737	0.006524	3.627	8.8e-07	619	0	NA	NA	2820	0	NA	NA	1916	0	>>	0.18	2436	0	>>	0.12
exm1579798	21	46950811	rs142899279	A/C	SLC19A1	NS	10522	0.000198807	12.668	1.3e-06	0.98	2734	0	>>	8.9e-09	618	0.002481	<<	0.33	2820	0	NA	NA	1914	0	>>	0.16	2436	0.0002973	6.796	0.06
exm841657	10	93668692	NA	A/G	FGFBP3	NS	10521	0	>>	2.5e-06	0.22	2737	0	>>	0.0032	617	0	>>	0.14	2816	0	>>	0.072	1916	0	>>	0.12	2435	0	>>	0.018
exm952402	11	104878019	rs45585331	C/A	CASP5	NS	10528	0.000265076	9.687	2.5e-06	0.36	2737	0.000932	10.218	1.3e-06	619	0	NA	NA	2820	0	NA	NA	1916	0	NA	NA	2436	0	NA	NA
exm533277	6	31918154	rs149101394	G/A	CFB	NS	10528	0.00258449	2.9	3.5e-06	0.56	2737	0.007456	2.531	0.00069	619	0.001241	4.205	0.2	2820	0.0002485	3.297	0.31	1916	0.000768	3.495	0.14	2436	0.0008918	3.434	0.095
exm510328	5	179285781	NA	A/G	C5orf45	NS	10528	0.000198807	11.613	4.2e-06	0.74	2737	0.000699	12.294	2.1e-06	619	0	NA	NA	2820	0	NA	NA	1916	0	NA	NA	2436	0	NA	NA
exm1043849	12	121177159	rs28940872	T/C	ACADS	NS	10519	6.62778e-05	25.694	7.1e-06	0.52	2731	0.0002331	14.831	0.0015	619	0	NA	NA	2819	0	>>	0.013	1915	0	NA	NA	2435	0	>>	0.042
exm-rs2981579	10	123337335	rs2981579	T/C	FGFR2	other/GWAS	10528	0.458714	1.151	7.2e-06	0.56	2737	0.5892	1.108	0.13	619	0.3015	1.127	0.37	2820	0.4284	1.105	0.093	1916	0.4078	1.141	0.063	2436	0.4055	1.285	8.3e-05
exm1620000	22	50303554	rs146322225	C/T	ALG12	other	10515	0.000199071	11.295	7.6e-06	0.59	2729	0.0007006	10.38	2.9e-05	619	0	>>	0.16	2820	0	NA	NA	1913	0	NA	NA	2434	0	NA	NA
exm-rs2981575	10	123346116	rs2981575	C/T	FGFR2	other/GWAS	10525	0.432511	1.149	1e-05	0.97	2737	0.565	1.105	0.14	619	0.2891	1.076	0.58	2818	0.3734	1.135	0.037	1915	0.4085	1.087	0.24	2436	0.387	1.299	4e-05
exm1013941	12	56998559	NA	T/C	BAZ2A	NS	10528	0	>>	1.3e-05	0.08	2737	0	>>	7.1e-06	619	0	NA	NA	2820	0	NA	NA	1916	0	NA	NA	2436	0	NA	NA
exm1234521	16	30795481	NA	G/C	ZNF629	NS	10526	0	>>	1.3e-05	0.49	2737	0	>>	0.0045	619	0	NA	NA	2818	0	NA	NA	1916	0	>>	0.24	2436	0	>>	0.0019
exm132287	1	186313108	rs58030082	T/C	TPR	NS	10527	0.0161718	1.593	1.3e-05	0.85	2737	0	>>	0.083	619	0.02109	2.405	0.0077	2819	0.05619	1.493	0.0006	1916	0.000384	2.462	0.48	2436	0	>>	0.0021
exm943000	11	76834837	rs143494790	A/G	CAPN5	NS	10528	0.00112657	3.922	1.5e-05	0.89	2737	0.003029	5.127	9.7e-07	619	0	NA	NA	2820	0	NA	NA	1916	0.001536	<0.001	0.21	2436	0	>>	0.24
exm1287054	17	7290695	rs7220814	G/A	TNK1	SP	10528	0.114248	0.8	2e-05	0.27	2737	0.01817	0.311	0.0019	619	0.0794	0.598	0.05	2820	0.2719	0.831	0.0068	1916	0.1002	0.875	0.27	2436	0.06748	0.731	0.023
exm158360	1	231004221	rs185614261	A/G	C1orf198	NS	10521	0	>>	2.1e-05	0.66	2732	0	>>	2.1e-05	619	0	NA	NA	2820	0	NA	NA	1914	0	NA	NA	2436	0	504.919	0.12
exm285458	3	367705	rs144055818	G/A	CHL1	NS	10528	0.000198807	9.641	2.5e-05	0.34	2737	0.000233	7.132	0.069	619	0	>>	0.17	2820	0	NA	NA	1916	0	>>	0.028	2436	0.0005945	8.305	0.002
exm2276233	12	15734702	rs144347297	A/C	PTPRO	NS	10528	0.00139165	3.331	2.9e-05	0.16	2737	0.001864	2.62	0.067	619	0	NA	NA	2820	0	NA	NA	1916	0.004992	3.491	0.0004	2436	0	>>	0.08
exm525246	6	28540989	rs138676911	G/T	SCAND3	NS	10528	0.000132538	13.462	3.6e-05	0.89	2737	0.000466	14.098	2.1e-05	619	0	NA	NA	2820	0	NA	NA	1916	0	NA	NA	2436	0	NA	NA
exm1437813	19	15572397	NA	G/A	RASAL3	NS	10505	0	>>	4.6e-05	0.38	2725	0	>>	0.00058	609	0	>>	0.18	2819	0	NA	NA	1916	0	NA	NA	2436	0	>>	0.18
exm221867	2	113539232	rs142134831	T/G	IL1A	NS	10528	0.000927767	4.04	5e-05	0.074	2737	0.003029	4.671	8.2e-06	619	0	NA	NA	2820	0	NA	NA	1916	0.000384	<<	0.51	2436	0	NA	NA
exm1161226	15	50904954	rs150072757	C/T	TRPM7	NS	10527	0.000331389	6.954	5.1e-05	0.93	2737	0.001165	5.936	0.00045	619	0	NA	NA	2819	0	NA	NA	1916	0	>>	0.083	2436	0	NA	NA
exm1621500	22	50682785	rs139896192	T/C	TUBGCP6	NS	10528	0.000331345	7.2	5.1e-05	0.42	2737	0.001165	7.15	5.3e-05	619	0	NA	NA	2820	0	NA	NA	1916	0	NA	NA	2436	0	NA	NA
exm412038	4	88534411	NA	A/G	DSPP	NS	10528	0.000331345	7.095	5.4e-05	0.42	2737	0.001165	7.074	5.5e-05	619	0	NA	NA	2820	0	NA	NA	1916	0	NA	NA	2436	0	NA	NA
exm1573155	21	43529776	NA	A/G	UMODL1	NS	10528	0.000596422	4.994	5.6e-05	0.18	2737	0.002097	4.075	0.0012	619	0	NA	NA	2820	0	>>	0.84	1916	0	>>	0.085	2436	0	NA	NA
exm166179	1	247471846	rs139561401	A/G	ZNF496	NS	10528	0.000198807	9.652	5.8e-05	0.62	2737	0.000699	8.508	0.00025	619	0	NA	NA	2820	0	NA	NA	1916	0	NA	NA	2436	0	>>	0.24
exm-rs1219648	10	123346190	rs1219648	G/A	FGFR2	other/GWAS	10527	0.379971	1.135	5.9e-05	0.55	2737	0.4194	1.035	0.6	619	0.2767	1.071	0.61	2819	0.3476	1.125	0.056	1916	0.394	1.101	0.17	2436	0.3823	1.319	1.4e-05
exm1348295	17	66270082	rs35397826	G/A	SLC16A6	NS	10527	0.116914	1.201	5.9e-05	0.3	2737	0.0918	1.088	0.45	618	0.1007	1.405	0.067	2820	0.1543	1.212	0.015	1916	0.1052	1.2	0.096	2436	0.1171	1.201	0.048
exm1211887	16	3642817	rs146901714	T/C	SLX4	NS	10528	0	>>	6e-05	0.51	2737	0	>>	0.00018	619	0	NA	NA	2820	0	NA	NA	1916	0	>>	0.51	2436	0	NA	NA
exm326285	3	58116540	NA	C/G	FLNB	NS	10526	0	>>	6.1e-05	0.19	2736	0	>>	9.1e-05	619	0	NA	NA	2820	0	NA	NA	1915	0	>>	0.15	2436	0	NA	NA
exm575228	6	119399385	rs192266016	T/G	FAM184A	NS	10526	0.000994168	3.907	6.2e-05	0.21	2735	0.003497	3.745	0.00014	619	0	NA	NA	2820	0	NA	NA	1916	0	NA	NA	2436	0	>>	0.096
exm-rs7716600	5	44875005	rs7716600	A/C	MRPS30	other/GWAS	10527	0.299377	1.147	6.3e-05	0.28	2737	0.1841	1.132	0.14	619	0.4603	1.487	0.0014	2820	0.4744	1.035	0.57	1915	0.2613	1.167	0.048	2436	0.228	1.191	0.015
exm911994	11	57958038	rs143165965	T/C	OR9Q2	NS	10528	0	>>	6.4e-05	0.32	2737	0	>>	0.0071	619	0	NA	NA	2820	0	NA	NA	1916	0	NA	NA	2436	0	>>	0.0023
exm514211	6	6266854	rs140712764	T/C	F13A1	NS	10528	6.62691e-05	20.787	6.8e-05	0.84	2737	0.000233	8.46	0.038	619	0	NA	NA	2820	0	>>	0.00058	1916	0	NA	NA	2436	0	NA	NA
exm59856	1	53377291	rs139969883	T/C	ECHDC2	NS	10528	0	>>	6.9e-05	0.69	2737	0	>>	0.00017	619	0	NA	NA	2820	0	>>	0.26	1916	0	NA	NA	2436	0	NA	NA
exm115063	1	160000435	rs12409352	T/A	PIGM	NS	10528	0.102253	0.807	7.1e-05	0.91	2737	0.05079	0.768	0.12	619	0.07072	0.809	0.41	2820	0.06561	0.835	0.16	1916	0.1575	0.809	0.037	2436	0.1766	0.788	0.0062
exm365036	3	172232682	rs143353036	G/A	TNFSF10	NS	10528	0.000331345	6.902	8e-05	0.67	2737	0.001165	6.781	9.3e-05	619	0	NA	NA	2820	0	NA	NA	1916	0	NA	NA	2436	0	NA	NA
exm1530816	20	25457055	rs146288604	A/G	NINL	NS	10505	0.413003	1.15	8.1e-05	0.32	2734	0.476	1.206	0.0051	611	0.2073	1.253	0.17	2815	0.09542	1.18	0.086	1912	0.6491	1.135	0.093	2433	0.578	1.078	0.24
exm367360	3	183508714	rs74496163	A/G	YEATS2	NS	10490	0.051497	0.738	8.7e-05	0.35	2733	0.01284	0.521	0.084	607	0.1738	0.781	0.15	2805	0.1201	0.728	0.0017	1913	0.03387	0.788	0.26	2432	0.003874	0.69	0.53
exm199583	2	70187809	rs140244507	A/G	ASPRV1	NS	10528	0.000132538	12.162	9.3e-05	0.92	2737	0.000466	9.866	0.00095	619	0	NA	NA	2820	0	>>	0.15	1916	0	NA	NA	2436	0	>>	0.1
exm1093791	14	24792132	rs74387312	G/A	ADCY4	NS	10528	0.000198807	8.838	9.9e-05	0.78	2737	0.000233	4.06	0.29	619	0	NA	NA	2820	0	NA	NA	1916	0	>>	0.13	2436	0.0005945	9.825	0.00046
exm1223310	16	20681229	rs61745764	A/T	ACSM1	NS	10528	0.0315441	1.442	0.0001	0.71	2737	0.1051	1.434	0.0003	619	0	>>	0.17	2820	0	NA	NA	1916	0.008065	1.836	0.059	2436	0.001189	0.499	0.53
exm357311	3	148575278	rs149931188	T/C	CPB1	NS	10528	0	>>	0.00011	0.94	2737	0	>>	0.0001	619	0	NA	NA	2820	0	NA	NA	1916	0	NA	NA	2436	0	NA	NA
exm540200	6	34512195	rs2233637	C/G	SPDEF	NS	10528	0.0895958	1.234	0.00011	0.066	2737	0.1386	1.155	0.13	619	0.0335	1.138	0.7	2820	0.1322	1.258	0.0061	1916	0.05607	1.311	0.06	2436	0.01546	1.42	0.13
exm878082	11	2169014	rs10770125	G/A	INS-IGF2	NS	10526	0.425305	0.882	0.00011	0.96	2736	0.2109	1.011	0.9	619	0.3933	0.827	0.14	2820	0.5171	0.914	0.14	1916	0.5714	0.872	0.052	2435	0.4836	0.798	0.00037
exm537291	6	32948385	rs144861747	A/G	BRD2	NS	10528	0.00165673	2.927	0.00012	0.28	2737	0.003728	2.43	0.025	619	0	>>	0.22	2820	0	NA	NA	1916	0.001152	5.495	0.0063	2436	0.001784	2.348	0.13
exm-rs7134594	12	110000193	rs7134594	C/T	MMAB	other/GWAS	10524	0.478982	1.134	0.00013	0.0026	2734	0.2853	1.135	0.083	619	0.3958	1.358	0.017	2819	0.6992	1.216	0.0034	1916	0.5069	1.087	0.24	2436	0.4608	1.061	0.35
exm1562686	21	16337963	rs143359165	A/T	NRIP1	NS	10528	0.000132538	12.236	0.00013	0.32	2737	0.000466	10.196	0.00067	619	0	NA	NA	2820	0	NA	NA	1916	0	>>	0.18	2436	0	NA	NA
exm240336	2	170090014	rs143413559	C/T	LRP2	NS	10528	0	>>	0.00014	0.62	2737	0	NA	NA	619	0	NA	NA	2820	0	NA	NA	1916	0	>>	5.6e-05	2436	0	NA	NA
exm504919	5	175793395	rs150819260	A/G	ARL10	NS	10528	0	>>	0.00014	0.34	2737	0	>>	0.00012	619	0	NA	NA	2820	0	NA	NA	1916	0	NA	NA	2436	0	NA	NA
exm53060	1	44290530	rs37458	G/A	ST3GAL3	NS	10522	0.262334	1.144	0.00014	0.75	2735	0.319	1.118	0.11	619	0.2667	0.979	0.88	2820	0.1481	1.214	0.016	1914	0.2483	1.111	0.19	2434	0.3366	1.186	0.0095
exm601387	7	4259879	rs149005994	G/A	SDK1	NS	10528	0.000265076	7.115	0.00014	0.15	2737	0.000233	18.849	0.00025	619	0	NA	NA	2820	0.000497	2.211	0.42	1916	0	NA	NA	2436	0.0002973	8.592	0.028
exm1035689	12	109994870	rs9593	A/T	MMAB	NS	10526	0.480048	1.133	0.00015	0.0019	2737	0.2859	1.136	0.082	619	0.3945	1.365	0.015	2818	0.7042	1.206	0.0053	1916	0.5065	1.089	0.23	2436	0.4599	1.065	0.32
exm11185	1	8397995	NA	A/G	SLC45A1	NS	10528	0	>>	0.00015	0.3	2737	0	>>	0.0004	619	0	NA	NA	2820	0	NA	NA	1916	0	NA	NA	2436	0	>>	0.17
exm2249858	11	43911365	rs2434478	T/C	ALKBH3	NS	10528	0.00251822	2.582	0.00015	0.87	2737	0.008854	2.551	0.00022	619	0	NA	NA	2820	0	NA	NA	1916	0	NA	NA	2436	0	>>	0.19
exm334985	3	102157417	rs6784389	G/A	ZPLD1	NS	10528	0.102651	0.814	0.00016	0.5	2737	0.1086	0.979	0.84	619	0.0732	0.767	0.31	2820	0.01715	0.745	0.25	1916	0.1494	0.879	0.2	2436	0.1683	0.675	1.9e-05
exm-rs3020644	6	31894626	rs3020644	G/A	CFB	other/HLA	10528	0.46607	0.88	0.00017	0.23	2737	0.1692	0.767	0.0058	619	0.5707	0.908	0.42	2820	0.7463	0.813	0.0021	1916	0.5603	0.898	0.13	2436	0.4117	0.992	0.89
exm243039	2	175265912	rs6716400	C/T	SCRN3	NS	10527	0.00642895	1.913	0.00018	0.78	2736	0.02191	1.883	0.00048	619	0	>>	0.062	2820	0	NA	NA	1916	0.001152	2.894	0.16	2436	0	NA	NA
exm368374	3	183957291	NA	A/G	VWA5B2	NS	10528	0.000463883	4.863	0.00019	0.81	2737	0.001398	4.498	0.0034	619	0	NA	NA	2820	0	664.02	0.058	1916	0.000384	5.253	0.14	2436	0	NA	NA
exm900686	11	36119939	rs147309219	G/A	LDLRAD3	NS	10528	0.000265076	7.253	0.00019	0.8	2737	0.000932	6.407	0.00077	619	0	NA	NA	2820	0	NA	NA	1916	0	NA	NA	2436	0	>>	0.24
exm1317579	17	38068621	rs12450091	C/T	GSDMB	NS	10528	0.0638834	0.772	0.0002	0.24	2737	0.004194	1.168	0.76	619	0.01117	1.249	0.68	2820	0.07977	0.76	0.02	1916	0.2254	0.736	0.00086	2436	0.008621	1.158	0.7
exm187327	2	37513340	rs141998414	T/C	PRKD3	NS	10528	0.000530152	4.52	0.0002	0.054	2737	0.000466	1.71	0.66	619	0	>>	0.13	2820	0	>>	0.42	1916	0.000384	4.005	0.22	2436	0.001486	4.776	0.0019
exm334983	3	102157365	rs6784362	T/A	ZPLD1	NS	10528	0.102518	0.817	0.0002	0.5	2737	0.1083	0.981	0.86	619	0.0732	0.767	0.31	2820	0.01715	0.745	0.25	1916	0.1494	0.886	0.22	2436	0.168	0.677	2.1e-05
exm659550	7	134849280	rs292501	T/A	TMEM140	NS	10528	0.0740225	1.275	0.00021	0.68	2737	0.2139	1.283	0.0014	619	0.002481	3.799	0.13	2820	0.03479	1.374	0.031	1916	0.01613	1.015	0.96	2436	0.004459	0.708	0.5
exm1473327	19	42840173	NA	A/G	MEGF8	NS	10527	0.000265076	7.209	0.00022	0.68	2737	0.000932	7.141	0.00024	619	0	NA	NA	2819	0	NA	NA	1916	0	NA	NA	2436	0	NA	NA
exm27554	1	21051116	rs149579175	A/G	SH2D5	NS	10528	0.000132538	11.077	0.00022	0.3	2737	0.000466	10.855	0.00029	619	0	NA	NA	2820	0	NA	NA	1916	0	>>	0.17	2436	0	NA	NA
exm982157	12	9020509	rs144876785	G/C	A2ML1	NS	10527	0.00225345	2.643	0.00022	0.67	2737	0.007922	2.639	0.00024	619	0	NA	NA	2819	0	NA	NA	1916	0	NA	NA	2436	0	NA	NA
exm180162	2	27424304	rs140443329	T/C	SLC5A6	NS	10528	6.62691e-05	17.431	0.00023	0.27	2737	0	NA	NA	619	0	NA	NA	2820	0	NA	NA	1916	0	>>	0.11	2436	0.0002973	15.354	0.00074
exm251838	2	188332602	rs113727256	C/T	TFPI	NS	10528	0.000331345	6.34	0.00023	0.11	2737	0.001165	6.53	0.00019	619	0	NA	NA	2820	0	NA	NA	1916	0	NA	NA	2436	0	NA	NA
exm621944	7	55221725	rs138847501	A/G	EGFR	NS	10528	0	>>	0.00023	0.22	2737	0	>>	0.00027	619	0	NA	NA	2820	0	NA	NA	1916	0	NA	NA	2436	0	NA	NA
exm914159	11	59834583	rs143965382	C/A	MS4A3	NS	10528	0.000463883	5.231	0.00023	0.62	2737	0.001631	4.931	0.00055	619	0	NA	NA	2820	0	NA	NA	1916	0	NA	NA	2436	0	>>	0.2
exm-rs10514718	3	61413814	rs10514718	G/C	PTPRG	other/GWAS	10524	0.0796208	0.797	0.00024	0.68	2737	0.0932	0.747	0.021	615	0.025	1.177	0.66	2820	0.1079	0.805	0.031	1916	0.06605	0.763	0.077	2436	0.05202	0.806	0.15
exm1158549	15	45434309	rs150683309	A/G	DUOX1	SP	10528	0.00119284	3.36	0.00024	0.98	2737	0.004194	3.569	0.00011	619	0	NA	NA	2820	0	NA	NA	1916	0	NA	NA	2436	0	NA	NA
exm2008744	22	36876729	rs146269725	C/T	TXN2	NS	10527	0.00125928	3.053	0.00024	0.89	2737	0	NA	NA	619	0	NA	NA	2819	0.004724	3.284	0.00011	1916	0	NA	NA	2436	0	NA	NA
exm2260228	13	60106925	rs1622710	T/C	DIAPH3	other/AIMS	10500	0.286151	0.851	0.00024	0.2	2723	0.6697	0.802	0.0031	619	0.08685	0.771	0.27	2808	0.1947	0.883	0.11	1915	0.1376	0.89	0.27	2435	0.07049	0.868	0.27
exm700258	8	51362258	rs145093612	A/G	SNTG1	NS	10528	0.000331345	5.773	0.00024	0.11	2737	0.000466	1.557	0.72	619	0	NA	NA	2820	0	NA	NA	1916	0	>>	0.05	2436	0.0008918	6.671	0.0012
exm845189	10	98095688	rs147702836	A/G	DNTT	NS	10524	0.000198913	8.015	0.00024	0.89	2737	0	NA	NA	619	0	NA	NA	2816	0.000747	8.197	0.00026	1916	0	NA	NA	2436	0	NA	NA
exm1789376	12	992587	rs150532648	G/A	WNK1	NS	10528	0.00344599	2.059	0.00025	0.46	2737	0	NA	NA	619	0	>>	0.069	2820	0.01292	2.007	0.00058	1916	0	NA	NA	2436	0	NA	NA
exm440407	5	428070	NA	T/C	AHRR	NS	10527	0	>>	0.00025	0.34	2737	0	>>	0.0012	619	0	NA	NA	2819	0	NA	NA	1916	0	NA	NA	2436	0	>>	0.1
exm45185	1	36786521	NA	G/A	SH3D21	NS	10524	0.000729056	4.18	0.00026	0.073	2736	0.002563	4.057	0.00045	618	0	NA	NA	2820	0	NA	NA	1914	0	NA	NA	2436	0	>>	0.26
exm744297	9	27292474	rs12337286	C/T	C9orf11	NS	10528	0.0619616	1.274	0.00026	0.91	2737	0.1538	1.311	0.0018	619	0.0273	0.783	0.52	2820	0.02684	1.177	0.36	1916	0.01843	1.368	0.16	2436	0.02883	1.231	0.23
exm942884	11	76813968	rs2233547	A/G	OMP	NS	10528	0.0019218	2.669	0.00026	0.95	2737	0.006757	2.334	0.0028	619	0	NA	NA	2820	0	>>	0.65	1916	0	>>	0.038	2436	0	>>	0.28
exm1395812	19	438830	rs140148508	C/T	SHC2	NS	10528	0.00689198	0.299	0.00027	0.27	2737	0.0233	0.287	0.00035	619	0	NA	NA	2820	0	NA	NA	1916	0.001152	<<	0.23	2436	0.0002973	1.478	0.79
exm335014	3	102181131	rs12054046	G/A	ZPLD1	NS	10525	0.102678	0.821	0.00027	0.6	2736	0.1082	0.992	0.94	619	0.07444	0.752	0.27	2819	0.0169	0.761	0.29	1915	0.151	0.88	0.2	2436	0.1677	0.684	3.2e-05
exm445415	5	13901641	rs35090077	C/A	DNAH5	NS	10528	0.0298211	0.644	0.00027	0.53	2737	0.09739	0.584	6e-05	619	0.004963	0.958	0.96	2820	0.0002485	<<	0.23	1916	0.00768	1.103	0.8	2436	0.002081	1.232	0.74
exm953079	11	107427713	rs116578571	C/T	ALKBH8	NS	10528	0.00291584	2.357	0.00027	0.6	2737	0.01002	2.334	0.00045	619	0.001241	2.098	0.6	2820	0	NA	NA	1916	0	>>	0.18	2436	0	NA	NA
exm1005630	12	52938320	rs2292506	T/C	KRT71	NS	10527	0.165142	0.852	0.00028	0.49	2737	0.2057	0.692	3.3e-05	618	0.1898	0.777	0.12	2820	0.1996	0.923	0.3	1916	0.1667	0.857	0.12	2436	0.0651	1.063	0.63
exm1035579	12	109937534	rs7298565	G/A	UBE3B	NS	10527	0.478327	1.127	0.00028	0.0029	2737	0.2763	1.131	0.095	619	0.397	1.336	0.024	2819	0.7056	1.188	0.01	1916	0.5096	1.102	0.17	2436	0.4596	1.058	0.38
exm116910	1	161018422	rs61733353	G/C	ARHGAP30	NS	10528	0.00583168	1.934	0.00028	0.33	2737	0.01911	1.952	0.00054	619	0	NA	NA	2820	0	>>	0.62	1916	0.002304	2.022	0.22	2436	0	NA	NA
exm1261324	16	81095485	rs145595395	A/G	C16orf46	ST	10528	6.62691e-05	18.027	0.00028	0.26	2737	0	>>	0.0053	619	0	>>	0.15	2820	0.0002485	6.417	0.069	1916	0	>>	0.13	2436	0	NA	NA
exm1513975	19	58067680	rs61734156	T/C	ZNF550	NS	10528	0.000265076	7.224	0.00028	0.7	2737	0.000932	7.115	0.00033	619	0	NA	NA	2820	0	NA	NA	1916	0	NA	NA	2436	0	NA	NA
exm464406	5	79809558	rs148781457	T/G	FAM151B	NS	10528	6.62691e-05	18.829	0.00028	0.19	2737	0.000233	15.718	0.0012	619	0	NA	NA	2820	0	NA	NA	1916	0	>>	0.051	2436	0	NA	NA
exm82912	1	110996652	rs62623571	T/C	PROK1	NS	10436	0.0160535	0.531	0.00028	0.85	2667	0.0532	0.517	0.00046	619	0	NA	NA	2810	0	NA	NA	1909	0.004244	0.741	0.61	2431	0.001789	0.617	0.56
exm2255870	3	183508590	rs79808533	G/A	YEATS2	S	10528	0.0577203	0.767	0.00029	0.34	2737	0.03239	0.788	0.24	619	0.1787	0.804	0.2	2820	0.1198	0.739	0.0026	1916	0.03533	0.789	0.26	2436	0.004162	0.806	0.69
exm897611	11	28057897	rs141828077	A/G	KIF18A	NS	10528	0.00960901	0.48	0.00029	0.53	2737	0.000233	<<	0.53	619	0.01489	0.57	0.34	2820	0.03255	0.476	0.00069	1916	0	NA	NA	2436	0.0002973	<<	0.53
exm1202861	16	1706275	NA	T/C	CRAMP1L	NS	10519	0.00072983	3.751	0.0003	0.7	2737	0.000466	1.697	0.66	619	0	NA	NA	2813	0.001247	2.579	0.13	1915	0.0007686	4.65	0.054	2435	0.0005949	8.162	0.002
exm1256774	16	72108192	NA	G/T	HPR	NS	10518	0	>>	0.0003	0.96	2737	0	>>	0.042	614	0	NA	NA	2819	0	NA	NA	1915	0	>>	0.013	2433	0	>>	0.054
exm1332577	17	45891202	NA	G/T	OSBPL7	SP	10383	0	>>	0.0003	0.16	2686	0	>>	0.0003	551	0	NA	NA	2817	0	NA	NA	1897	0	NA	NA	2432	0	NA	NA
exm293049	3	14755667	rs141714657	C/G	C3orf20	SP	10528	0.000397614	5.404	0.0003	0.55	2737	0.000699	10.979	9.3e-06	619	0	NA	NA	2820	0	NA	NA	1916	0.000384	<<	0.49	2436	0.0005945	1.156	0.91
S1.2 African Americans
							Overall					African American				Native Hawaiian				Japanese American				Latino				European American
SNP	Chr	Position	SNP ID	A1/A2	Gene	Type	No. of samples	MAF	OR	P	P_Het	No. of samples	MAF	OR	P	No. of samples	MAF	OR	P	No. of samples	MAF	OR	P	No. of samples	MAF	OR	P	No. of samples	MAF	OR	P
exm1579798	21	46950811	rs142899279	A/C	SLC19A1	NS	10522	0.000198807	12.668	1.3e-06	0.98	2734	0	>>	8.9e-09	618	0.002481	<<	0.33	2820	0	NA	NA	1914	0	>>	0.16	2436	0.0002973	6.796	0.06
exm29140	1	22188296	rs142149919	A/G	HSPG2	NS	10519	0.000265076	5.892	0.0018	0.021	2735	0	>>	4.9e-07	619	0	NA	NA	2818	0	NA	NA	1913	0.001152	<<	0.23	2434	0.0002973	<<	0.51
exm61019	1	54476084	rs145889899	T/C	LDLRAD1	SP	10528	0.00185553	3.743	2.5e-07	0.037	2737	0.006524	3.627	8.8e-07	619	0	NA	NA	2820	0	NA	NA	1916	0	>>	0.18	2436	0	>>	0.12
exm943000	11	76834837	rs143494790	A/G	CAPN5	NS	10528	0.00112657	3.922	1.5e-05	0.89	2737	0.003029	5.127	9.7e-07	619	0	NA	NA	2820	0	NA	NA	1916	0.001536	<<	0.21	2436	0	>>	0.24
exm952402	11	104878019	rs45585331	C/A	CASP5	NS	10528	0.000265076	9.687	2.5e-06	0.36	2737	0.000932	10.218	1.3e-06	619	0	NA	NA	2820	0	NA	NA	1916	0	NA	NA	2436	0	NA	NA
exm510328	5	179285781	NA	A/G	C5orf45	NS	10528	0.000198807	11.613	4.2e-06	0.74	2737	0.000699	12.294	2.1e-06	619	0	NA	NA	2820	0	NA	NA	1916	0	NA	NA	2436	0	NA	NA
exm-rs10819291	9	130186700	rs10819291	T/C	ZNF79	other/AIMS	10528	0.156859	1.1	0.027	0.35	2737	0.03728	1.959	3.4e-06	619	0.103	0.685	0.091	2820	0.2229	0.977	0.75	1916	0.3326	1.171	0.035	2436	0.1073	1.062	0.55
exm1013941	12	56998559	NA	T/C	BAZ2A	NS	10528	0	>>	1.3e-05	0.08	2737	0	>>	7.1e-06	619	0	NA	NA	2820	0	NA	NA	1916	0	NA	NA	2436	0	NA	NA
exm221867	2	113539232	rs142134831	T/G	IL1A	NS	10528	0.000927767	4.04	5e-05	0.074	2737	0.003029	4.671	8.2e-06	619	0	NA	NA	2820	0	NA	NA	1916	0.000384	<<	0.51	2436	0	NA	NA
exm293049	3	14755667	rs141714657	C/G	C3orf20	SP	10528	0.000397614	5.404	0.0003	0.55	2737	0.000699	10.979	9.3e-06	619	0	NA	NA	2820	0	NA	NA	1916	0.000384	<<	0.49	2436	0.0005945	1.156	0.91
exm158360	1	231004221	rs185614261	A/G	C1orf198	NS	10521	0	>>	2.1e-05	0.66	2732	0	>>	2.1e-05	619	0	NA	NA	2820	0	NA	NA	1914	0	NA	NA	2436	0	504.919	0.12
exm525246	6	28540989	rs138676911	G/T	SCAND3	NS	10528	0.000132538	13.462	3.6e-05	0.89	2737	0.000466	14.098	2.1e-05	619	0	NA	NA	2820	0	NA	NA	1916	0	NA	NA	2436	0	NA	NA
exm409265	4	81188221	rs112475347	T/G	FGF5	NS	10528	0.000662691	2.385	0.056	0.22	2737	0	>>	2.4e-05	619	0.001241	<<	0.5	2820	0	NA	NA	1916	0	NA	NA	2436	0.002675	1.305	0.63
exm918759	11	62381076	rs146358003	T/C	ROM1	NS	10496	0.000332049	4.775	0.00082	0.063	2729	0	>>	2.6e-05	618	0.002481	0.838	0.89	2804	0	NA	NA	1910	0	>>	0.01	2435	0.0008918	<<	0.2
exm1141714	15	23889873	rs138628273	C/G	MAGEL2	NS	10521	0.00145927	1.568	0.18	0.17	2736	0	>>	2.9e-05	619	0.001241	1.868	0.66	2817	0	NA	NA	1915	0.00269	0.91	0.89	2434	0.004167	0.957	0.93
exm1620000	22	50303554	rs146322225	C/T	ALG12	other	10515	0.000199071	11.295	7.6e-06	0.59	2729	0.0007006	10.38	2.9e-05	619	0	>>	0.16	2820	0	NA	NA	1913	0	NA	NA	2434	0	NA	NA
exm1373907	18	7037641	rs143997842	A/G	LAMA1	NS	10528	0.00265076	1.492	0.12	0.17	2737	0.000932	8.428	3.1e-05	619	0.001241	2.132	0.59	2820	0	NA	NA	1916	0.00384	0.459	0.31	2436	0.007432	1.095	0.8
exm1005630	12	52938320	rs2292506	T/C	KRT71	NS	10527	0.165142	0.852	0.00028	0.49	2737	0.2057	0.692	3.3e-05	618	0.1898	0.777	0.12	2820	0.1996	0.923	0.3	1916	0.1667	0.857	0.12	2436	0.0651	1.063	0.63
exm826817	10	61833684	rs140463162	T/C	ANK3	NS	10528	0.00125911	2.234	0.014	0.68	2737	0.000233	22.426	3.8e-05	619	0.001241	<<	0.42	2820	0	NA	NA	1916	0.003072	1.525	0.44	2436	0.002675	1.336	0.59
exm291259	3	12857896	NA	T/C	CAND2	NS	10514	0.000861612	2.677	0.01	0.52	2734	0.000466	13.162	4e-05	619	0.001241	<<	0.46	2818	0.0002485	2.547	0.5	1911	0	>>	0.17	2432	0.002675	1.069	0.91
exm1169014	15	64792042	rs151216141	T/G	ZNF609	NS	10528	0.00231942	1.082	0.8	0.049	2737	0	>>	4.6e-05	619	0	NA	NA	2820	0	NA	NA	1916	0.01344	0.796	0.49	2436	0	NA	NA
exm1621500	22	50682785	rs139896192	T/C	TUBGCP6	NS	10528	0.000331345	7.2	5.1e-05	0.42	2737	0.001165	7.15	5.3e-05	619	0	NA	NA	2820	0	NA	NA	1916	0	NA	NA	2436	0	NA	NA
exm412038	4	88534411	NA	A/G	DSPP	NS	10528	0.000331345	7.095	5.4e-05	0.42	2737	0.001165	7.074	5.5e-05	619	0	NA	NA	2820	0	NA	NA	1916	0	NA	NA	2436	0	NA	NA
exm-rs2242663	11	66335308	rs2242663	G/A	CTSF	other/GWAS	10523	0.222149	1.073	0.056	0.62	2733	0.2239	1.347	5.6e-05	619	0.1538	0.799	0.22	2820	0.2498	0.938	0.36	1915	0.1695	1.137	0.15	2436	0.2441	1.03	0.68
exm1554550	20	60348084	rs34937312	T/C	CDH4	NS	10528	0.0164347	1.296	0.017	0.0078	2737	0.01025	2.523	5.7e-05	619	0.007444	0.603	0.54	2820	0	>>	0.031	1916	0.02458	0.848	0.48	2436	0.03983	1.22	0.18
exm475558	5	128302185	rs142676290	A/G	SLC27A6	NS	10528	0.000397614	5.16	0.0007	0.4	2737	0.000932	8.124	5.9e-05	619	0	NA	NA	2820	0	NA	NA	1916	0.000768	<<	0.32	2436	0	>>	0.24
exm445415	5	13901641	rs35090077	C/A	DNAH5	NS	10528	0.0298211	0.644	0.00027	0.53	2737	0.09739	0.584	6e-05	619	0.004963	0.958	0.96	2820	0.0002485	<<	0.23	1916	0.00768	1.103	0.8	2436	0.002081	1.232	0.74
exm495488	5	149755362	rs75583421	A/G	TCOF1	NS	10528	0.0038436	1.552	0.039	0.91	2737	0.001864	5.331	7.6e-05	619	0.003722	0.525	0.59	2820	0	NA	NA	1916	0.005376	0.305	0.098	2436	0.00981	1.588	0.093
exm1488520	19	49368843	rs506425	C/T	PLEKHA4	NS	10528	0.367661	0.955	0.23	0.21	2737	0.7521	0.739	7.8e-05	619	0.1998	1.084	0.6	2820	0.1079	0.881	0.2	1916	0.2873	1.097	0.23	2436	0.2904	1.053	0.46
exm326285	3	58116540	NA	C/G	FLNB	NS	10526	0	>>	6.1e-05	0.19	2736	0	>>	9.1e-05	619	0	NA	NA	2820	0	NA	NA	1915	0	>>	0.15	2436	0	NA	NA
exm523720	6	27293107	rs61746402	A/G	FKSG83	NS	10528	0.0186216	1.261	0.032	0.9	2737	0.0254	1.926	9.2e-05	619	0.01365	1.256	0.65	2820	0.000497	0.632	0.71	1916	0.02343	0.823	0.43	2436	0.02913	1.063	0.74
exm523721	6	27293114	rs61743950	A/T	FKSG83	NS	10528	0.0186216	1.261	0.032	0.9	2737	0.0254	1.926	9.2e-05	619	0.01365	1.256	0.65	2820	0.000497	0.632	0.71	1916	0.02343	0.823	0.43	2436	0.02913	1.063	0.74
exm365036	3	172232682	rs143353036	G/A	TNFSF10	NS	10528	0.000331345	6.902	8e-05	0.67	2737	0.001165	6.781	9.3e-05	619	0	NA	NA	2820	0	NA	NA	1916	0	NA	NA	2436	0	NA	NA
exm2273427	6	134308216	rs117173630	G/C	TBPL1	other	10528	0.00291584	1.435	0.14	0.68	2737	0.000233	20.394	9.4e-05	619	0.001241	<<	0.47	2820	0	NA	NA	1916	0.003072	1.887	0.22	2436	0.01011	0.938	0.84
exm417846	4	108948869	rs76476980	A/G	HADH	NS	10528	0.00212061	2.652	0.0003	0.43	2737	0.007223	2.869	9.5e-05	619	0	NA	NA	2820	0	NA	NA	1916	0	NA	NA	2436	0.0002973	<<	0.28
exm1597553	22	29456467	rs41281607	C/T	C22orf31	NS	10528	0.00344599	1.762	0.0079	0.85	2737	0.000932	7.71	0.0001	619	0.002481	0.918	0.95	2820	0	>>	0.28	1916	0.006528	1.389	0.4	2436	0.008621	1.437	0.23
exm357311	3	148575278	rs149931188	T/C	CPB1	NS	10528	0	>>	0.00011	0.94	2737	0	>>	0.0001	619	0	NA	NA	2820	0	NA	NA	1916	0	NA	NA	2436	0	NA	NA
exm824445	10	50830155	rs78925077	G/C	CHAT	NS	10528	0.00245195	0.9	0.74	0.52	2737	0	>>	0.0001	619	0.004963	0.46	0.48	2820	0.003231	1.513	0.38	1916	0.000384	<<	0.5	2436	0.005648	0.212	0.022
exm1028851	12	100042040	rs11109968	G/C	FAM71C	NS	10528	0.238569	1.018	0.62	0.39	2737	0.3057	0.745	0.00011	619	0.165	1.038	0.82	2820	0.174	1.048	0.54	1916	0.1751	1.086	0.35	2436	0.297	1.252	0.00078
exm1158549	15	45434309	rs150683309	A/G	DUOX1	SP	10528	0.00119284	3.36	0.00024	0.98	2737	0.004194	3.569	0.00011	619	0	NA	NA	2820	0	NA	NA	1916	0	NA	NA	2436	0	NA	NA
exm1406415	19	3589461	rs182473859	T/C	GIPC3	NS	10528	0.000331345	3.728	0.019	0.14	2737	0	>>	0.00011	619	0	>>	0.17	2820	0	NA	NA	1916	0.00192	0.59	0.58	2436	0	NA	NA
exm2270047	5	50812738	rs10052591	C/T	ISL1	other	10528	0.39006	1.011	0.74	0.47	2737	0.4518	0.77	0.00011	619	0.361	1.084	0.5	2820	0.3	1.124	0.068	1916	0.4017	1.068	0.36	2436	0.4171	1.08	0.22
exm1380057	18	25532304	rs2289664	C/T	CDH2	NS	10528	0.0145129	1.241	0.063	0.88	2737	0.002563	4.393	0.00012	619	0.01365	1.811	0.19	2820	0.0164	1.294	0.22	1916	0.01536	1.188	0.52	2436	0.02705	0.888	0.55
exm316921	3	50006026	rs148635727	A/G	RBM6	NS	10523	0.00663042	1.888	0.00032	0.7	2736	0.02261	1.994	0.00012	619	0	NA	NA	2816	0	NA	NA	1916	0.000384	2.065	0.6	2436	0.0005945	<<	0.36
exm504919	5	175793395	rs150819260	A/G	ARL10	NS	10528	0	>>	0.00014	0.34	2737	0	>>	0.00012	619	0	NA	NA	2820	0	NA	NA	1916	0	NA	NA	2436	0	NA	NA
exm575127	6	119297143	rs41292558	A/T	FAM184A	NS	10527	0.00583245	1.325	0.12	0.25	2737	0.001165	6.902	0.00012	618	0	>>	0.16	2820	0	>>	0.25	1916	0.02419	0.961	0.87	2436	0.005945	1.28	0.51
exm1295374	17	11166786	rs112380460	A/G	SHISA6	NS	10528	0.00152419	1.649	0.12	0.99	2737	0	>>	0.00013	619	0	>>	0.19	2820	0.0002485	<<	0.32	1916	0.004224	0.575	0.39	2436	0.00327	1.963	0.12
exm1892257	17	48600427	rs146276624	A/C	MYCBPAP	NS	10528	0.000198807	5.482	0.011	0.12	2737	0.000233	19.953	0.00013	619	0.001241	<<	0.46	2820	0	NA	NA	1916	0	NA	NA	2436	0.0002973	<<	0.49
exm995790	12	44130330	rs116948464	A/G	PUS7L	NS	10528	0.00132538	1.425	0.33	0.52	2737	0	>>	0.00013	619	0.002481	<<	0.31	2820	0	NA	NA	1916	0.00192	1.604	0.52	2436	0.003864	0.856	0.77
exm575228	6	119399385	rs192266016	T/G	FAM184A	NS	10526	0.000994168	3.907	6.2e-05	0.21	2735	0.003497	3.745	0.00014	619	0	NA	NA	2820	0	NA	NA	1916	0	NA	NA	2436	0	>>	0.096
exm1365210	17	78972930	rs144716331	T/G	CHMP6	NS	10507	0.000265147	6.382	0.00048	0.93	2725	0	>>	0.00015	618	0	>>	0.057	2818	0	>>	0.03	1913	0.000768	0.901	0.93	2433	0.0005949	2.216	0.42
exm1404729	19	2834336	rs142404413	T/C	ZNF554	NS	10528	0.000795229	3.335	0.0027	0.42	2737	0.002097	4.82	0.00015	619	0	NA	NA	2820	0.0007455	<<	0.32	1916	0	NA	NA	2436	0	NA	NA
exm158020	1	230822832	rs143526339	G/C	COG2	NS	10528	0.00152419	1.439	0.26	0.59	2737	0	>>	0.00015	619	0.002481	1.037	0.98	2820	0	NA	NA	1916	0.002304	1.705	0.38	2436	0.004459	0.735	0.54
exm441631	5	1085534	rs143024441	A/C	SLC12A7	NS	10520	0.000795229	2.827	0.0094	0.46	2732	0.000699	9.047	0.00015	619	0	NA	NA	2820	0	NA	NA	1914	0	>>	0.12	2435	0.002675	0.936	0.91
exm1121827	14	92460176	rs137974620	G/C	TRIP11	NS	10528	0.000861498	3.094	0.0021	0.92	2737	0.000466	11.74	0.00016	619	0	NA	NA	2820	0	NA	NA	1916	0.001152	2.409	0.27	2436	0.002378	1.677	0.34
exm433359	4	169300938	rs61740720	T/C	DDX60L	NS	10528	0.0202783	1.227	0.044	0.5	2737	0.009553	2.478	0.00016	619	0.01241	1.202	0.73	2820	0.000497	1.121	0.91	1916	0.02573	1.144	0.53	2436	0.05529	1.042	0.76
exm1202132	16	1536455	rs141845288	T/C	PTX4	NS	10508	6.62778e-05	13.73	0.0026	0.78	2731	0	>>	0.00017	618	0	NA	NA	2817	0	NA	NA	1913	0	NA	NA	2429	0.0002973	<<	0.5
exm1619262	22	47091143	rs36211081	C/A	CERK	NS	10528	0.000662691	2.214	0.08	0.5	2737	0	>>	0.00017	619	0.001241	<<	0.55	2820	0	NA	NA	1916	0.000768	2.22	0.42	2436	0.002081	0.962	0.96
exm59856	1	53377291	rs139969883	T/C	ECHDC2	NS	10528	0	>>	6.9e-05	0.69	2737	0	>>	0.00017	619	0	NA	NA	2820	0	>>	0.26	1916	0	NA	NA	2436	0	NA	NA
exm928470	11	65647737	rs116206676	A/G	CTSW	NS	10528	0.000132538	10.45	0.00042	0.6	2737	0.000466	11.661	0.00017	619	0	NA	NA	2820	0	NA	NA	1916	0	NA	NA	2436	0	NA	NA
exm1211887	16	3642817	rs146901714	T/C	SLX4	NS	10528	0	>>	6e-05	0.51	2737	0	>>	0.00018	619	0	NA	NA	2820	0	NA	NA	1916	0	>>	0.51	2436	0	NA	NA
exm1454704	19	35260442	rs117610843	T/C	ZNF599	NS	10528	0.00801856	1.352	0.046	0.98	2737	0.003728	3.59	0.00018	619	0.004963	0.932	0.94	2820	0.0002485	<<	0.33	1916	0.02074	0.848	0.53	2436	0.01367	1.432	0.12
exm701423	8	55538687	rs147990983	T/C	RP1	NS	10525	0.000729153	3.2	0.0051	0.12	2737	0.001631	5.352	0.00018	619	0	NA	NA	2820	0	NA	NA	1914	0.001538	0.328	0.31	2435	0	NA	NA
exm251838	2	188332602	rs113727256	C/T	TFPI	NS	10528	0.000331345	6.34	0.00023	0.11	2737	0.001165	6.53	0.00019	619	0	NA	NA	2820	0	NA	NA	1916	0	NA	NA	2436	0	NA	NA
exm523710	6	27279805	rs61736098	T/G	POM121L2	NS	10511	0.018224	1.301	0.015	0.88	2735	0.02563	1.871	0.0002	619	0.01241	1.394	0.51	2815	0.000497	0.63	0.71	1910	0.02266	0.848	0.51	2432	0.02794	1.162	0.41
exm1186474	15	89169738	rs147477549	A/G	AEN	NS	10528	0.000662691	1.894	0.18	0.29	2737	0	>>	0.00021	619	0	NA	NA	2820	0	NA	NA	1916	0.001152	0.676	0.73	2436	0.002081	1.095	0.9
exm1221842	16	19471571	rs36019638	A/G	TMC5	NS	10528	0.0210073	1.127	0.24	0.93	2737	0.01142	2.343	0.00021	619	0.01365	1.353	0.55	2820	0.000497	<<	0.13	1916	0.02343	0.835	0.46	2436	0.05767	0.992	0.95
exm1048150	12	124092004	rs80215100	T/C	DDX55	NS	10528	0.000927767	3.56	0.00043	0.75	2737	0.003262	3.767	0.00022	619	0	NA	NA	2820	0	NA	NA	1916	0	NA	NA	2436	0	NA	NA
exm1387850	18	51888070	rs145808382	G/C	C18orf54	NS	10528	0.0038436	1.418	0.1	0.34	2737	0	>>	0.00022	619	0.06948	1.109	0.66	2820	0	365.017	0.31	1916	0	>>	0.42	2436	0.0005945	1.845	0.62
exm2249858	11	43911365	rs2434478	T/C	ALKBH3	S	10528	0.00251822	2.582	0.00015	0.87	2737	0.008854	2.551	0.00022	619	0	NA	NA	2820	0	NA	NA	1916	0	NA	NA	2436	0	>>	0.19
exm1473327	19	42840173	NA	A/G	MEGF8	NS	10527	0.000265076	7.209	0.00022	0.68	2737	0.000932	7.141	0.00024	619	0	NA	NA	2819	0	NA	NA	1916	0	NA	NA	2436	0	NA	NA
exm801191	9	139925490	rs141846761	T/C	FUT7	NS	10528	0.000662691	1.652	0.31	0.64	2737	0	>>	0.00024	619	0	NA	NA	2820	0	NA	NA	1916	0.000768	<<	0.31	2436	0.002378	0.791	0.73
exm982157	12	9020509	rs144876785	G/C	A2ML1	NS	10527	0.00225345	2.643	0.00022	0.67	2737	0.007922	2.639	0.00024	619	0	NA	NA	2819	0	NA	NA	1916	0	NA	NA	2436	0	NA	NA
exm166179	1	247471846	rs139561401	A/G	ZNF496	NS	10528	0.000198807	9.652	5.8e-05	0.62	2737	0.000699	8.508	0.00025	619	0	NA	NA	2820	0	NA	NA	1916	0	NA	NA	2436	0	>>	0.24
exm587570	6	152534783	rs139466191	C/A	SYNE1	NS	10527	0.000198833	8.625	0.0003	0.19	2737	0.000699	8.931	0.00025	619	0	NA	NA	2819	0	NA	NA	1916	0	NA	NA	2436	0	NA	NA
exm601387	7	4259879	rs149005994	G/A	SDK1	NS	10528	0.000265076	7.115	0.00014	0.15	2737	0.000233	18.849	0.00025	619	0	NA	NA	2820	0.000497	2.211	0.42	1916	0	NA	NA	2436	0.0002973	8.592	0.028
exm1028855	12	100042163	rs11109969	G/A	FAM71C	NS	10528	0.235255	1.025	0.49	0.45	2737	0.2947	0.757	0.00026	619	0.165	1.056	0.74	2820	0.174	1.048	0.54	1916	0.1747	1.089	0.34	2436	0.2964	1.258	0.0006
exm2228632	19	18368694	NA	A/G	KIAA1683	other	10523	0.000132538	6.385	0.017	0.55	2736	0	>>	0.00026	619	0	NA	NA	2820	0	NA	NA	1914	0	NA	NA	2434	0.0005945	<<	0.23
exm982171	12	9020859	NA	C/A	A2ML1	NS	10528	0.000331345	5.97	0.00053	0.71	2737	0.000932	7.287	0.00026	619	0	NA	NA	2820	0	>>	0.84	1916	0.000384	<<	0.51	2436	0	NA	NA
exm621944	7	55221725	rs138847501	A/G	EGFR	NS	10528	0	>>	0.00023	0.22	2737	0	>>	0.00027	619	0	NA	NA	2820	0	NA	NA	1916	0	NA	NA	2436	0	NA	NA
exm598275	7	1486451	rs75056037	A/G	MICALL2	NS	10528	0.108681	1.025	0.62	0.75	2737	0.12	1.414	0.00028	619	0.09553	1.283	0.23	2820	0.03554	0.966	0.83	1916	0.2289	0.921	0.34	2436	0.09185	0.817	0.078
exm1080985	13	113669159	rs149468042	T/C	MCF2L	SP	10528	0.00112657	3.311	0.0004	0.72	2737	0.003728	3.546	0.00029	619	0.001241	<<	0.47	2820	0	NA	NA	1916	0	>>	0.36	2436	0	NA	NA
exm1199657	16	847033	rs80165523	G/C	CHTF18	NS	10516	0.00059658	3.53	0.0042	0.43	2732	0.001632	5.148	0.00029	618	0.001241	<<	0.22	2817	0	NA	NA	1914	0.000384	<<	0.49	2435	0	NA	NA
exm1545161	20	44462924	rs57799507	A/G	SNX21	NS	10503	0.0542959	1.037	0.6	0.98	2727	0.000699	8.399	0.00029	616	0.03367	2.161	0.0084	2817	0.1693	1.001	0.99	1912	0.0384	0.816	0.3	2431	0.002378	1.279	0.71
exm240839	2	170460536	rs6708481	C/A	PPIG	SP	10528	0.0333996	0.659	0.00031	0.3	2737	0.1114	0.639	0.00029	619	0.001241	<<	0.36	2820	0	NA	NA	1916	0.008449	1.006	0.99	2436	0.0008918	0.669	0.74
exm27554	1	21051116	rs149579175	A/G	SH2D5	NS	10528	0.000132538	11.077	0.00022	0.3	2737	0.000466	10.855	0.00029	619	0	NA	NA	2820	0	NA	NA	1916	0	>>	0.17	2436	0	NA	NA
exm689153	8	22885246	rs141856351	A/G	TNFRSF10B	NS	10528	0.000463883	4.41	0.0015	0.77	2737	0.001165	6.258	0.00029	619	0	NA	NA	2820	0	NA	NA	1916	0.000768	1.239	0.86	2436	0	NA	NA
exm973978	12	1910786	rs62621429	T/C	CACNA2D4	NS	10528	0.0125249	1.132	0.34	0.38	2737	0.004893	3.134	0.00029	619	0.01241	1.184	0.75	2820	0.0002485	1.5	0.78	1916	0.01843	0.615	0.11	2436	0.0324	1.09	0.62
exm1223310	16	20681229	rs61745764	A/T	ACSM1	NS	10528	0.0315441	1.442	0.0001	0.71	2737	0.1051	1.434	0.0003	619	0	>>	0.17	2820	0	NA	NA	1916	0.008065	1.836	0.059	2436	0.001189	0.499	0.53
exm1318304	17	38418816	rs141184179	T/C	WIPF2	NS	10527	0.00132538	3.106	0.00039	0.43	2737	0.004427	3.249	0.0003	619	0	NA	NA	2820	0	NA	NA	1916	0.000384	2.359	0.54	2435	0	NA	NA
exm1332577	17	45891202	NA	G/T	OSBPL7	SP	10383	0	>>	0.0003	0.16	2686	0	>>	0.0003	551	0	NA	NA	2817	0	NA	NA	1897	0	NA	NA	2432	0	NA	NA
exm1352946	17	72926682	rs141455683	A/G	OTOP2	NS	10528	0.00205434	2.275	0.0014	0.33	2737	0.000699	8.464	0.0003	619	0.002481	0.986	0.99	2820	0.000497	<<	0.24	1916	0.00192	2.28	0.18	2436	0.005648	1.914	0.057
exm1603968	22	36556882	rs148712729	C/T	APOL3	NS	10527	0.000662778	3.899	0.00097	0.069	2737	0.002097	4.511	0.0003	619	0	NA	NA	2819	0	NA	NA	1916	0.000384	<<	0.51	2436	0	NA	NA
exm1634045	23	37027276	rs142884749	G/A	FAM47C	NS	6551	0.000140134	15.411	0.00054	0.56	1630	0.0004812	16.853	0.0003	452	0	NA	NA	1762	0	NA	NA	1139	0	NA	NA	1568	0	NA	NA
exm1519100	20	1551621	rs147405398	C/T	SIRPB1	NS	10527	6.62778e-05	18.434	0.00031	0.3	2736	0.0002331	18.069	0.00032	619	0	NA	NA	2820	0	NA	NA	1916	0	NA	NA	2436	0	NA	NA
exm449351	5	35065328	rs146459777	G/C	PRLR	NS	10528	0.000927767	1.775	0.17	0.22	2737	0	>>	0.00032	619	0.001241	<<	0.5	2820	0	NA	NA	1916	0.00192	0.47	0.48	2436	0.002378	1.708	0.32
exm630155	7	81714211	rs80063198	C/T	CACNA2D1	NS	10528	0	>>	0.00063	0.11	2737	0	>>	0.00032	619	0	NA	NA	2820	0	NA	NA	1916	0	NA	NA	2436	0	NA	NA
exm1288980	17	7671294	rs139308934	A/G	DNAH2	NS	10528	6.62691e-05	17.865	0.00041	0.53	2737	0.000233	18.505	0.00033	619	0	NA	NA	2820	0	NA	NA	1916	0	NA	NA	2436	0	NA	NA
exm1513975	19	58067680	rs61734156	T/C	ZNF550	NS	10528	0.000265076	7.224	0.00028	0.7	2737	0.000932	7.115	0.00033	619	0	NA	NA	2820	0	NA	NA	1916	0	NA	NA	2436	0	NA	NA
exm1395812	19	438830	rs140148508	C/T	SHC2	NS	10528	0.00689198	0.299	0.00027	0.27	2737	0.0233	0.287	0.00035	619	0	NA	NA	2820	0	NA	NA	1916	0.001152	<<	0.23	2436	0.0002973	1.478	0.79
S1.3 European Americans
							Overall					African American				Native Hawaiian				Japanese American				Latino				European American
SNP	Chr	Position	SNP ID	A1/A2	Gene	Type	No. of samples	MAF	OR	P	P_Het	No. of samples	MAF	OR	P	No. of samples	MAF	OR	P	No. of samples	MAF	OR	P	No. of samples	MAF	OR	P	No. of samples	MAF	OR	P
exm1187274	15	89803950	rs62020347	T/C	FANCI	NS	10528	0.0332671	0.816	0.024	0.45	2737	0.02703	1.094	0.63	619	0.01489	1.718	0.21	2820	0.0002485	<<	0.23	1916	0.04301	1.261	0.14	2436	0.07759	0.465	1.8e-07
exm1199472	16	840599	rs59706474	T/C	CHTF18	NS	10528	0.057389	1.068	0.36	0.046	2737	0.1372	0.922	0.42	619	0.04839	0.623	0.15	2820	0.008946	0.912	0.78	1916	0.04954	1.055	0.73	2436	0.0217	2.174	7.1e-06
exm-rs1219648	10	123346190	rs1219648	G/A	FGFR2	other/GWAS	10527	0.379971	1.135	5.9e-05	0.55	2737	0.4194	1.035	0.6	619	0.2767	1.071	0.61	2819	0.3476	1.125	0.056	1916	0.394	1.101	0.17	2436	0.3823	1.319	1.4e-05
exm334985	3	102157417	rs6784389	G/A	ZPLD1	NS	10528	0.102651	0.814	0.00016	0.5	2737	0.1086	0.979	0.84	619	0.0732	0.767	0.31	2820	0.01715	0.745	0.25	1916	0.1494	0.879	0.2	2436	0.1683	0.675	1.9e-05
exm1190992	15	91525048	rs142416384	G/C	PRC1	NS	10528	0.00291584	1.73	0.019	0.063	2737	0.002563	0.3	0.22	619	0.003722	1.42	0.71	2820	0.000497	<<	0.37	1916	0.004224	0.551	0.36	2436	0.005054	3.613	2.1e-05
exm334983	3	102157365	rs6784362	T/A	ZPLD1	NS	10528	0.102518	0.817	0.0002	0.5	2737	0.1083	0.981	0.86	619	0.0732	0.767	0.31	2820	0.01715	0.745	0.25	1916	0.1494	0.886	0.22	2436	0.168	0.677	2.1e-05
exm722239	8	134072363	rs4486183	T/G	SLA	NS	10528	0.0387674	1.182	0.051	0.87	2737	0.1195	1.063	0.54	619	0.007444	0.873	0.85	2820	0	>>	0.65	1916	0.01767	1.151	0.57	2436	0.005945	3.383	2.1e-05
exm2273154	23	83808253	rs969017	T/G	HDX	other	6548	0.51991	0.921	0.023	0.72	1630	0.6126	0.997	0.97	452	0.4682	1.216	0.17	1761	0.6007	0.966	0.62	1138	0.3626	0.961	0.66	1567	0.4232	0.737	3.2e-05
exm335014	3	102181131	rs12054046	G/A	ZPLD1	NS	10525	0.102678	0.821	0.00027	0.6	2736	0.1082	0.992	0.94	619	0.07444	0.752	0.27	2819	0.0169	0.761	0.29	1915	0.151	0.88	0.2	2436	0.1677	0.684	3.2e-05
exm-rs2981575	10	123346116	rs2981575	C/T	FGFR2	other/GWAS	10525	0.432511	1.149	1e-05	0.97	2737	0.565	1.105	0.14	619	0.2891	1.076	0.58	2818	0.3734	1.135	0.037	1915	0.4085	1.087	0.24	2436	0.387	1.299	4e-05
exm1190101	15	91354521	rs7167216	A/G	BLM	NS	10527	0.0655488	0.834	0.0067	0.86	2737	0.09226	0.988	0.92	619	0.02233	1.148	0.71	2819	0.04351	1.045	0.75	1916	0.05108	0.75	0.091	2436	0.07937	0.573	5.1e-05
exm1190039	15	91326099	rs11852361	T/C	BLM	NS	10528	0.045063	0.744	0.00041	0.75	2737	0.06477	0.859	0.28	619	0.01489	1.477	0.4	2820	0.0007455	0.646	0.59	1916	0.04685	0.815	0.24	2436	0.07878	0.572	5.4e-05
exm1432779	19	13249098	rs150928114	A/G	NACC1	NS	10528	0.00112657	2.098	0.032	0.39	2737	0.000466	3.738	0.17	619	0.001241	<<	0.49	2820	0.0002485	<<	0.37	1916	0.00384	0.379	0.2	2436	0.0008918	8.823	6.3e-05
exm2264018	3	179162316	rs2287208	C/A	GNB4	other	10528	0.478529	0.96	0.19	0.78	2737	0.4189	0.97	0.64	619	0.3685	0.896	0.42	2820	0.5	1.186	0.0048	1916	0.4935	0.965	0.61	2436	0.5437	0.78	6.6e-05
exm-rs2981582	10	123352317	rs2981582	T/C	FGFR2	other/GWAS	10527	0.369565	1.121	0.0004	0.81	2737	0.469	0.981	0.77	619	0.2519	1.067	0.64	2819	0.27	1.15	0.035	1916	0.3886	1.099	0.18	2436	0.3751	1.289	8.1e-05
exm-rs2981579	10	123337335	rs2981579	T/C	FGFR2	other/GWAS	10528	0.458714	1.151	7.2e-06	0.56	2737	0.5892	1.108	0.13	619	0.3015	1.127	0.37	2820	0.4284	1.105	0.093	1916	0.4078	1.141	0.063	2436	0.4055	1.285	8.3e-05
exm308987	3	47047500	rs181413143	A/G	NBEAL2	NS	10528	0.000861498	3.232	0.00037	0.92	2737	0	NA	NA	619	0.001241	1.517	0.77	2820	0	NA	NA	1916	0.00192	1.289	0.73	2436	0.002081	4.829	0.0001
exm533998	6	32015775	rs140530599	A/G	TNXB	NS	10528	0.00589795	1.165	0.43	0.8	2737	0.00233	0.388	0.35	619	0.001241	<<	0.49	2820	0.000497	1.669	0.68	1916	0.02919	1.07	0.75	2436	0	>>	0.0001
exm-rs710521	3	189645933	rs710521	G/A	LEPREL1	other/GWAS	10527	0.240093	0.913	0.013	0.8	2736	0.2216	0.957	0.59	619	0.2916	0.915	0.49	2820	0.2289	0.94	0.38	1916	0.22	1.073	0.4	2436	0.2803	0.756	0.00016
exm1648035	23	83723541	rs35161124	G/A	HDX	NS	6551	0.102298	0.826	0.0018	0.91	1630	0.03898	0.826	0.35	452	0.07203	0.9	0.71	1762	0.08857	0.939	0.6	1139	0.09048	1.043	0.78	1568	0.2156	0.704	0.00017
exm576519	6	126329589	rs146575767	G/A	TRMT11	NS	10528	0.000331345	3.747	0.0096	0.49	2737	0.000932	<<	0.25	619	0	>>	0.12	2820	0	NA	NA	1916	0.000384	3.77	0.13	2436	0	>>	0.00017
exm2265493	3	117740707	rs817515	G/A	NOT_FOUND	other	10528	0.427833	0.933	0.03	0.29	2737	0.5683	0.971	0.66	619	0.3921	1.09	0.48	2820	0.3337	1.007	0.91	1916	0.3218	0.931	0.34	2436	0.4518	0.79	0.00019
exm1445180	19	18502835	rs6512265	G/A	LRRC25	NS	10528	0.310007	1.004	0.9	0.8	2737	0.206	0.796	0.0073	619	0.2854	0.918	0.54	2820	0.4207	0.978	0.72	1916	0.2945	0.93	0.36	2436	0.3282	1.275	0.0002
exm309580	3	47447473	rs138320436	A/C	PTPN23	NS	10528	0.000861498	3.096	0.00072	0.94	2737	0	NA	NA	619	0.001241	1.517	0.77	2820	0	NA	NA	1916	0.00192	1.289	0.73	2436	0.002081	4.568	0.00021
exm-rs7221109	17	38770286	rs7221109	T/C	SMARCE1	other/GWAS	10528	0.280053	0.931	0.041	0.0046	2737	0.1999	0.989	0.89	619	0.196	0.96	0.79	2820	0.2726	0.967	0.62	1916	0.3076	1.08	0.31	2436	0.39	0.786	0.00022
exm1202723	16	1634241	rs139619013	C/T	IFT140	NS	10524	0.000662691	3.186	0.0037	0.28	2734	0.000466	1.694	0.67	619	0.001241	<<	0.49	2820	0	NA	NA	1915	0.00192	1.805	0.38	2436	0.0005945	10.277	0.00027
exm260480	2	208842154	rs71418661	A/G	PLEKHM3	NS	10528	0.000265076	5.19	0.0025	0.086	2737	0.000466	<<	0.45	619	0	NA	NA	2820	0	NA	NA	1916	0.000384	1.961	0.63	2436	0.0002973	17.488	0.00027
exm716777	8	116631660	rs61745721	C/T	TRPS1	NS	10528	0.000132538	8.492	0.0016	0.99	2737	0	NA	NA	619	0	NA	NA	2820	0	NA	NA	1916	0.000768	2.29	0.4	2436	0	>>	0.00028
exm1529239	20	23030102	rs191884040	T/C	THBD	NS	10507	0.00404456	1.551	0.049	0.041	2723	0.01353	1.283	0.33	619	0	NA	NA	2819	0	NA	NA	1913	0.001152	1.637	0.59	2433	0	>>	0.00029
exm1555673	20	60892077	NA	C/A	LAMA5	NS	10528	0	>>	0.00033	0.63	2737	0	NA	NA	619	0	>>	0.17	2820	0	NA	NA	1916	0	NA	NA	2436	0	>>	0.0003
exm1127511	14	101348572	rs112608318	T/C	RTL1	NS	10528	0.0100066	1.577	0.00057	0.62	2737	0.00466	1.514	0.31	619	0.01241	0.601	0.44	2820	0.0002485	<<	0.38	1916	0.02727	1.401	0.092	2436	0.01457	2.131	0.00031
exm669247	7	149475056	NA	A/G	SSPO	NS	10528	0	>>	0.00079	0.35	2737	0	NA	NA	619	0	NA	NA	2820	0	NA	NA	1916	0	NA	NA	2436	0	>>	0.00031
exm1199401	16	839269	rs77682584	A/G	CHTF18	NS	10528	0.105434	0.975	0.64	0.22	2737	0.1871	0.962	0.66	619	0.08065	0.784	0.32	2820	0.1138	0.861	0.12	1916	0.06874	0.905	0.48	2436	0.02556	1.836	0.00035
exm1211793	16	3639827	rs3810813	A/G	SLX4	NS	10528	0.0918489	1.01	0.86	0.95	2737	0.0205	0.797	0.36	619	0.1266	1.113	0.54	2820	0.2013	0.911	0.22	1916	0.07911	0.875	0.33	2436	0.05351	1.554	0.00035
exm686599	8	20107816	rs141630311	A/G	LZTS1	NS	10528	0	>>	0.00047	0.059	2737	0	NA	NA	619	0	NA	NA	2820	0	NA	NA	1916	0	NA	NA	2436	0	>>	0.00036
exm878082	11	2169014	rs10770125	G/A	INS-IGF2	NS	10526	0.425305	0.882	0.00011	0.96	2736	0.2109	1.011	0.9	619	0.3933	0.827	0.14	2820	0.5171	0.914	0.14	1916	0.5714	0.872	0.052	2435	0.4836	0.798	0.00037
exm1658880	23	135310785	rs2273221	T/C	MAP7D3	NS	6550	0.493973	0.876	0.00032	0.46	1630	0.6776	0.942	0.44	452	0.2225	0.754	0.12	1762	0.3941	0.869	0.044	1138	0.4618	0.963	0.67	1568	0.476	0.771	0.00039
exm-rs1264327	6	30850582	rs115233703	T/C	MIR4640	other/HLA	10526	0.21457	1.052	0.17	0.15	2737	0.1079	0.836	0.12	617	0.182	1.062	0.7	2820	0.2321	0.989	0.88	1916	0.2323	0.984	0.85	2436	0.3237	1.264	0.0004
exm953837	11	108196896	rs56009889	T/C	ATM	NS	10528	0.000331345	4.133	0.0065	0.22	2737	0.000233	<<	0.64	619	0	NA	NA	2820	0	NA	NA	1916	0.000768	<<	0.37	2436	0.0005945	9.805	0.00041
exm1458096	19	36340009	rs113825926	A/G	NPHS1	NS	10528	0.00371107	1.797	0.0045	0.74	2737	0.002796	1.677	0.33	619	0.004963	0.51	0.54	2820	0	NA	NA	1916	0.00576	1.004	0.99	2436	0.007432	2.581	0.00044
exm1093791	14	24792132	rs74387312	G/A	ADCY4	NS	10528	0.000198807	8.838	9.9e-05	0.78	2737	0.000233	4.06	0.29	619	0	NA	NA	2820	0	NA	NA	1916	0	>>	0.13	2436	0.0005945	9.825	0.00046
exm2267082	10	15943346	rs11253684	A/G	FAM188A	other/AIMS	10528	0.219483	1.048	0.37	0.083	2737	0.6372	0.943	0.43	619	0.0397	0.831	0.59	2820	0.03951	1.068	0.66	1916	0.07719	1	1	2436	0.05499	1.538	0.00047
exm2272591	17	44974347	rs197932	C/T	WNT9B	other/AIMS	10528	0.457919	0.954	0.17	0.016	2737	0.795	0.946	0.51	619	0.2196	1.289	0.078	2820	0.2468	0.983	0.8	1916	0.4466	1.058	0.42	2436	0.3463	0.79	0.00049
exm282899	2	241808308	NA	A/C	AGXT	NS	10528	0.00357853	1.744	0.0088	0.16	2737	0.003029	0.869	0.83	619	0.003722	<<	0.23	2820	0.0002485	3.376	0.36	1916	0.004608	1.142	0.78	2436	0.007432	2.575	0.00052
exm1561822	20	62838961	rs148972645	G/A	MYT1	NS	10528	0.000596422	2.734	0.029	0.78	2737	0.001165	0.697	0.74	619	0	NA	NA	2820	0.0002485	<<	0.27	1916	0	NA	NA	2436	0.0008918	8.054	0.00053
exm948364	11	93469892	rs34591613	C/G	TAF1D	NS	10516	0.00491172	1.607	0.0096	0.45	2737	0.004893	0.995	0.99	619	0.006203	0.367	0.34	2810	0	NA	NA	1915	0.006533	1.28	0.54	2435	0.009221	2.328	0.00053
exm243496	2	176829117	rs34897061	C/G	KIAA1715	NS	10516	0.0203106	1.225	0.044	0.73	2737	0.01561	0.626	0.12	619	0.01985	0.646	0.41	2810	0.0002498	<<	0.57	1916	0.02227	1.073	0.76	2434	0.04881	1.554	0.00054
exm312242	3	48637143	rs139999010	T/C	UQCRC1	SP	10528	0.000530152	2.472	0.056	0.94	2737	0	NA	NA	619	0	NA	NA	2820	0	NA	NA	1916	0.002304	0.283	0.22	2436	0.0005945	9.655	0.00054
exm-rs4784227	16	52599188	rs4784227	T/C	TOX3	other/GWAS	10518	0.206261	1.268	6e-11	0.049	2737	0.08038	1.26	0.041	609	0.3186	1.183	0.19	2820	0.2266	1.256	0.00084	1916	0.2938	1.34	7.7e-05	2436	0.2482	1.268	0.00055
exm1298075	17	16347245	rs185998385	T/C	C17orf76	NS	10528	0.0083499	1.03	0.86	0.17	2737	0.000699	<<	0.39	619	0	>>	0.21	2820	0	NA	NA	1916	0.04685	0.898	0.53	2436	0.0002973	20.743	0.00058
exm1658892	23	135313034	rs1055497	T/G	MAP7D3	NS	6547	0.437027	0.887	0.00099	0.15	1629	0.4961	0.968	0.66	452	0.2203	0.751	0.12	1760	0.394	0.871	0.047	1138	0.4418	0.987	0.88	1568	0.4717	0.777	0.00058
exm178049	2	26418053	rs137852769	G/C	HADHA	NS	10528	0.000198807	7.423	0.00044	0.12	2737	0.000466	<<	0.43	619	0	NA	NA	2820	0	NA	NA	1916	0.000384	9.062	0.018	2436	0	>>	0.00059
exm1028855	12	100042163	rs11109969	G/A	FAM71C	NS	10528	0.235255	1.025	0.49	0.45	2737	0.2947	0.757	0.00026	619	0.165	1.056	0.74	2820	0.174	1.048	0.54	1916	0.1747	1.089	0.34	2436	0.2964	1.258	0.0006
exm1097966	14	39587798	rs139047393	T/A	SIP1	NS	10528	0.000397614	4.433	0.0019	0.28	2737	0.000699	<<	0.39	619	0	NA	NA	2820	0	NA	NA	1916	0	>>	0.14	2436	0.0008918	7.236	0.0006
exm494457	5	149359991	rs104893915	T/C	SLC26A2	NS	10528	0.00072896	2.481	0.03	0.12	2737	0.001165	<<	0.24	619	0	NA	NA	2820	0	NA	NA	1916	0.001152	1.396	0.72	2436	0.0008918	7.29	0.0006
exm893995	11	17809762	rs149628273	C/T	SERGEF	NS	10528	0.00848244	0.952	0.77	0.9	2737	0.001165	<<	0.26	619	0.004963	<<	0.082	2820	0	NA	NA	1916	0.04531	0.947	0.75	2436	0.0002973	17.688	0.0006
exm1375394	18	10487749	rs114154601	T/C	APCDD1	NS	10528	0.000331345	4.967	0.0015	0.48	2737	0.000233	7.034	0.068	619	0.001241	1.841	0.67	2820	0	NA	NA	1916	0.001152	1.893	0.43	2436	0	>>	0.00061
exm-rs758747	16	3627358	rs758747	T/C	NLRC3	other/GWAS	10513	0.38215	1.075	0.027	0.84	2727	0.5607	1.082	0.25	619	0.2519	0.963	0.79	2816	0.3868	0.987	0.83	1915	0.264	1.051	0.52	2436	0.272	1.26	0.00065
exm2262618	9	18125966	rs579392	C/T	SH3GL2	other/AIMS	10528	0.119881	1.101	0.11	0.63	2737	0.37	1.03	0.68	619	0.0397	1.048	0.88	2820	0.02634	1.131	0.48	1916	0.02227	1.255	0.29	2436	0.007432	2.605	0.00065
exm466671	5	90024735	rs2366928	G/A	GPR98	NS	10527	0.198966	0.927	0.057	0.34	2737	0.1107	1.055	0.61	619	0.3424	0.977	0.86	2819	0.1703	1.056	0.5	1916	0.1893	0.937	0.48	2436	0.319	0.788	0.00065
exm1404185	19	2426037	rs7252121	T/C	TMPRSS9	NS	10528	0.0125249	1.072	0.65	0.55	2737	0.04171	0.934	0.69	619	0	>>	0.42	2820	0	NA	NA	1916	0.003456	0.564	0.41	2436	0.0002973	15.945	0.00071
exm-rs1264309	6	30875899	rs115948800	C/T	GTF2H4	other/HLA	10528	0.235388	1.058	0.12	0.12	2737	0.1484	0.898	0.27	619	0.2208	1.114	0.46	2820	0.2386	0.994	0.93	1916	0.2439	0.999	0.99	2436	0.3395	1.249	0.00072
exm-rs7738138	6	30887344	rs116691239	C/T	VARS2	other/HLA	10528	0.235388	1.058	0.12	0.12	2737	0.1484	0.898	0.27	619	0.2208	1.114	0.46	2820	0.2386	0.994	0.93	1916	0.2439	0.999	0.99	2436	0.3395	1.249	0.00072
exm2251301	13	104383255	rs1274749	G/A	MIR548AS	other	10526	0.484622	0.969	0.31	0.22	2737	0.4695	1.081	0.25	619	0.4764	1.08	0.53	2819	0.5298	1.032	0.6	1915	0.4666	0.958	0.55	2436	0.4658	0.806	0.00072
exm529100	6	30890483	rs115063829	T/G	VARS2	SP	10528	0.235388	1.058	0.12	0.12	2737	0.1484	0.898	0.27	619	0.2208	1.114	0.46	2820	0.2386	0.994	0.93	1916	0.2439	0.999	0.99	2436	0.3395	1.249	0.00072
exm381362	4	1725159	rs145470576	G/A	TACC3	NS	10528	6.62691e-05	13.535	0.0024	0.34	2737	0.000233	<<	0.64	619	0	NA	NA	2820	0	NA	NA	1916	0	NA	NA	2436	0	>>	0.00073
exm1363039	17	78032753	rs187993089	T/C	CCDC40	NS	10527	6.62778e-05	14.13	0.0015	0.097	2737	0	NA	NA	619	0	NA	NA	2820	0	NA	NA	1916	0	NA	NA	2435	0.0002974	16.122	0.00074
exm180162	2	27424304	rs140443329	T/C	SLC5A6	NS	10528	6.62691e-05	17.431	0.00023	0.27	2737	0	NA	NA	619	0	NA	NA	2820	0	NA	NA	1916	0	>>	0.11	2436	0.0002973	15.354	0.00074
exm698957	8	42587552	rs56198260	A/G	CHRNB3	NS	10528	0.00072896	2.95	0.0064	0.53	2737	0.000466	1.77	0.64	619	0.001241	<<	0.44	2820	0	NA	NA	1916	0.001536	1.086	0.92	2436	0.001189	5.974	0.00074
exm-rs1264303	6	30882513	rs116106165	C/T	VARS2	other/HLA	10527	0.235353	1.058	0.12	0.12	2737	0.1484	0.898	0.27	619	0.2208	1.114	0.46	2820	0.2386	0.994	0.93	1916	0.2435	1.001	0.99	2435	0.3397	1.249	0.00075
exm-rs2252760	6	30892377	rs115696940	C/G	VARS2	other/HLA	10519	0.235474	1.058	0.12	0.12	2737	0.1484	0.898	0.27	618	0.2208	1.127	0.42	2817	0.2387	0.992	0.91	1914	0.2437	0.997	0.97	2433	0.3401	1.248	0.00075
exm334765	3	101476645	rs145072852	T/C	CEP97	NS	10528	0.000927767	3.123	0.0008	0.44	2737	0.000932	<<	0.31	619	0	>>	0.035	2820	0	NA	NA	1916	0.00192	2.37	0.15	2436	0.001486	5.449	0.00075
exm1028851	12	100042040	rs11109968	G/C	FAM71C	NS	10528	0.238569	1.018	0.62	0.39	2737	0.3057	0.745	0.00011	619	0.165	1.038	0.82	2820	0.174	1.048	0.54	1916	0.1751	1.086	0.35	2436	0.297	1.252	0.00078
exm-rs2532929	6	30897774	rs114588299	C/T	SFTA2	other/HLA	10528	0.399867	1.021	0.54	0.066	2737	0.1617	0.91	0.31	619	0.3474	1.017	0.9	2820	0.62	0.975	0.69	1916	0.4931	0.9	0.13	2436	0.3808	1.243	0.00081
exm460487	5	72419402	rs149174030	A/G	TMEM171	NS	10528	0.000662691	2.057	0.11	0.85	2737	0.000233	<<	0.51	619	0	NA	NA	2820	0.001243	0.396	0.39	1916	0.000768	<<	0.35	2436	0.0005945	9.083	0.00083
exm-rs1264333	6	30844314	rs1264333	G/A	MIR4640	other/HLA	10528	0.236249	1.06	0.11	0.11	2737	0.1484	0.898	0.27	619	0.2208	1.129	0.41	2820	0.2388	1.001	0.99	1916	0.2492	1	1	2436	0.3389	1.246	0.00084
exm-rs2844654	6	30838688	rs116679077	C/A	MIR4640	other/HLA	10528	0.236117	1.061	0.1	0.11	2737	0.1484	0.898	0.27	619	0.2208	1.129	0.41	2820	0.2383	1.003	0.96	1916	0.2492	1	1	2436	0.3389	1.246	0.00084
exm1010469	12	55641811	rs79165229	T/C	OR6C74	NS	10528	0.0137177	0.865	0.33	0.18	2737	0.03145	1.026	0.89	619	0.002481	1.885	0.53	2820	0.00174	0.603	0.53	1916	0.009601	1.277	0.45	2436	0.0113	0.167	0.00089
exm139392	1	203054980	rs115855025	T/C	MYOG	NS	10526	0.00212089	2.103	0.004	0.26	2736	0.001399	1.199	0.83	619	0.003722	2.415	0.28	2820	0	NA	NA	1916	0.002688	0.908	0.89	2435	0.004756	2.965	0.00089
exm326052	3	57902766	rs143689400	T/A	SLMAP	NS	10516	0.000597372	2.606	0.033	0.1	2737	0.000233	<<	0.58	619	0.001241	<<	0.58	2808	0	NA	NA	1916	0.001536	0.567	0.61	2436	0.0008918	6.914	0.00092
exm1540388	20	36989391	rs2232597	A/G	LBP	NS	10528	0.001723	2.277	0.0032	0.23	2737	0.000699	3.141	0.14	619	0	NA	NA	2820	0.0002485	<<	0.6	1916	0.00384	1.072	0.9	2436	0.003567	3.376	0.00094
exm2270697	7	134195690	rs782513	C/T	AKR1B10	other	10528	0.465673	0.989	0.73	0.42	2737	0.6652	1.129	0.088	619	0.3387	1.158	0.26	2820	0.3509	1.045	0.48	1916	0.404	0.993	0.92	2436	0.4266	0.807	0.00096
exm776677	9	119976883	rs139148246	T/A	ASTN2	NS	10528	0.0010603	2.14	0.027	0.54	2737	0.001165	<<	0.19	619	0.001241	<<	0.5	2820	0	NA	NA	1916	0.001152	1.435	0.69	2436	0.002081	4.069	0.00096
exm986199	12	13102576	rs149059133	A/G	GPRC5D	NS	10528	0.00815109	0.49	0.00071	0.64	2737	0.002796	0.886	0.85	619	0.002481	<<	0.34	2820	0	NA	NA	1916	0.01421	0.676	0.25	2436	0.0214	0.368	0.00098
exm1332671	17	45904542	rs149631185	T/C	MRPL10	NS	10528	0.000530152	2.29	0.11	0.93	2737	0.000466	<<	0.52	619	0.001241	<<	0.49	2820	0	NA	NA	1916	0.00192	0.895	0.9	2436	0	>>	0.00099
exm2269612	3	28828525	rs7633531	T/G	LOC645206	other/AIMS	10527	0.469115	1.05	0.16	0.19	2737	0.7307	1.031	0.71	619	0.2754	0.956	0.76	2820	0.497	1.018	0.77	1916	0.4274	0.981	0.79	2435	0.1805	1.294	0.001
exm2269926	4	63448482	rs6823706	C/T	NOT_FOUND	other/AIMS	10528	0.462293	0.971	0.37	0.85	2737	0.7071	1.062	0.44	619	0.33	1.201	0.15	2820	0.4632	1.016	0.79	1916	0.3053	0.984	0.84	2436	0.302	0.793	0.001
exm93897	1	149906999	rs148625178	G/C	MTMR11	NS	10528	0.000331345	2.668	0.11	0.69	2737	0.000466	<<	0.47	619	0	NA	NA	2820	0	NA	NA	1916	0.001152	0.705	0.76	2436	0	>>	0.001
exm-rs2535326	6	30832063	rs116397653	A/G	MIR4640	other/HLA	10528	0.272167	1.037	0.29	0.071	2737	0.2043	0.912	0.27	619	0.232	1.099	0.52	2820	0.2386	1.002	0.98	1916	0.3134	0.948	0.47	2436	0.3766	1.238	0.0011
exm-rs893817	15	74229065	rs893817	G/A	LOXL1	other/GWAS	10527	0.383351	1.076	0.021	0.03	2737	0.3124	1.041	0.57	619	0.4801	1.078	0.54	2819	0.5189	0.982	0.75	1916	0.3233	1.075	0.34	2436	0.335	1.232	0.0011
exm1121141	14	91744435	rs115510695	T/C	CCDC88C	NS	10499	0.00664805	0.67	0.073	0.32	2720	0.01289	0.517	0.08	619	0.05459	0.742	0.31	2811	0	NA	NA	1914	0.0003843	<<	0.5	2435	0	>>	0.0011
exm141258	1	204518457	rs41299595	C/A	MDM4	NS	10528	0.00145792	2.182	0.0098	0.61	2737	0.001398	0.517	0.54	619	0.002481	<<	0.36	2820	0	NA	NA	1916	0.002304	2.118	0.19	2436	0.002378	3.92	0.0011
exm437905	4	187122332	rs34745240	A/G	CYP4V2	NS	10528	0.0300861	1.162	0.1	0.069	2737	0.0671	0.993	0.96	619	0.01241	0.591	0.44	2820	0.0002485	1.353	0.83	1916	0.0265	1.01	0.96	2436	0.02556	1.713	0.0011
exm561051	6	74491002	rs7742662	T/G	CD109	NS	10527	0.0269088	1.05	0.65	0.8	2736	0.08625	0.993	0.95	619	0.001241	2.938	0.45	2820	0.00671	0.826	0.64	1916	0.003072	2.639	0.043	2436	0	>>	0.0011
exm583552	6	144263042	rs147054773	G/T	PLAGL1	NS	10527	0.000397614	4.803	0.00031	0.67	2736	0.000233	6.831	0.071	619	0	NA	NA	2820	0	NA	NA	1916	0.000384	2.086	0.6	2436	0.001189	5.31	0.0011
exm669156	7	149462627	rs141214897	A/G	ZNF467	NS	10527	0.0010603	2.699	0.0032	0.63	2737	0.000699	2.401	0.33	619	0.002481	0.96	0.97	2820	0	NA	NA	1916	0.00192	1.378	0.66	2435	0.001784	4.551	0.0011
exm-rs2535335	6	30812497	rs116208316	C/T	MIR4640	other/HLA	10522	0.27497	1.039	0.27	0.099	2736	0.2121	0.919	0.3	619	0.2333	1.111	0.47	2815	0.2392	0.999	0.99	1916	0.3141	0.954	0.53	2436	0.3775	1.237	0.0012
exm1097190	14	36191031	rs75856669	G/A	RALGAPA1	NS	10526	0.0151796	1.057	0.66	0.65	2737	0	NA	NA	619	0.02109	0.958	0.92	2819	0.05271	1.042	0.75	1916	0	NA	NA	2435	0	>>	0.0012
exm1332936	17	46000437	NA	A/G	SP2	NS	10528	0.00152419	1.466	0.25	0.36	2737	0	NA	NA	619	0.02854	1.294	0.45	2820	0	>>	0.093	1916	0	NA	NA	2436	0	>>	0.0012
exm143486	1	206658354	rs52817862	T/C	IKBKE	NS	10528	0.00218688	1.103	0.75	0.2	2737	0	>>	0.14	619	0.02109	1.057	0.89	2820	0.003976	0.724	0.53	1916	0	NA	NA	2436	0	>>	0.0012
S1.4 Japanese Americans
							Overall					African American				Native Hawaiian				Japanese American				Latino				European American
SNP	Chr	Position	SNP ID	A1/A2	Gene	Type	No. of samples	MAF	OR	P	P_Het	No. of samples	MAF	OR	P	No. of samples	MAF	OR	P	No. of samples	MAF	OR	P	No. of samples	MAF	OR	P	No. of samples	MAF	OR	P
exm1347693	17	65717525	rs2291284	C/T	NOL11	NS	10514	0.0957814	0.855	0.013	0.75	2736	0.005592	0.755	0.58	614	0.1542	1.319	0.12	2813	0.2859	0.714	1.4e-05	1915	0.04916	1.298	0.091	2436	0.006243	0.812	0.67
exm2270117	5	118951870	rs328661	C/T	FAM170A	other	10527	0.488932	0.917	0.0063	0.017	2737	0.6007	1.02	0.76	619	0.5434	0.896	0.38	2819	0.3807	0.765	2.1e-05	1916	0.5242	0.89	0.1	2436	0.4355	1.039	0.55
exm69153	1	75693501	rs149696907	A/G	SLC44A5	NS	10528	0.000530152	2.077	0.19	0.54	2737	0.001864	<<	0.15	619	0	NA	NA	2820	0	>>	3.7e-05	1916	0	NA	NA	2436	0	NA	NA
exm1551095	20	52193088	rs6063966	T/C	ZNF217	NS	10528	0.122001	0.972	0.56	0.0059	2737	0.2011	0.926	0.36	619	0.2184	0.739	0.057	2820	0.02734	1.828	5.6e-05	1916	0.1025	0.903	0.39	2436	0.1263	0.95	0.59
exm1828305	15	39881431	NA	G/A	THBS1	NS	10527	0.00139183	2.486	0.0012	0.11	2737	0	NA	NA	619	0.003722	<<	0.19	2819	0.004227	3.236	6.2e-05	1916	0.000384	<<	0.35	2436	0	NA	NA
exm2267825	15	39844315	rs2618157	A/G	THBS1	other/AIMS	10528	0.211266	1.076	0.16	0.49	2737	0.5925	1.042	0.56	619	0.04218	1.12	0.72	2820	0.004722	3.071	6.7e-05	1916	0.09447	1.194	0.13	2436	0.1029	0.933	0.52
exm1551060	20	52192637	rs34323943	C/T	ZNF217	NS	10528	0.0690524	0.971	0.63	0.0097	2737	0.02633	0.777	0.26	619	0.2159	0.765	0.091	2820	0.02734	1.808	8e-05	1916	0.08986	0.843	0.18	2436	0.1222	0.954	0.62
exm473355	5	118969960	rs328694	T/C	FAM170A	NS	10526	0.444584	1.051	0.11	0.018	2737	0.3569	0.949	0.45	619	0.4082	0.985	0.91	2819	0.5768	1.268	9.3e-05	1916	0.3775	1.02	0.79	2435	0.459	0.969	0.61
exm2261582	4	110940045	rs4698804	C/T	EGF	other/AIMS	10528	0.245659	0.91	0.035	0.36	2737	0.5466	0.97	0.68	619	0.1253	1.076	0.69	2820	0.1814	0.717	9.8e-05	1916	0.1863	0.99	0.91	2436	0.01338	1.407	0.2
exm2008744	22	36876729	rs146269725	C/T	TXN2	NS	10527	0.00125928	3.053	0.00024	0.89	2737	0	NA	NA	619	0	NA	NA	2819	0.004724	3.284	0.00011	1916	0	NA	NA	2436	0	NA	NA
exm1703056	11	16816195	NA	A/G	PLEKHA7	NS	10528	0.000198807	6.937	0.00032	0.69	2737	0	NA	NA	619	0	NA	NA	2820	0.0007455	7.453	0.00013	1916	0	NA	NA	2436	0	NA	NA
exm686121	8	19362732	rs146273214	A/G	CSGALNACT1	NS	10528	0.000198807	6.997	0.0011	0.95	2737	0.000699	<<	0.39	619	0	>>	0.06	2820	0	>>	0.00013	1916	0	NA	NA	2436	0	NA	NA
exm2258565	8	10316236	rs1986357	G/A	MSRA	other	10524	0.488067	1.069	0.032	0.72	2733	0.6206	1.088	0.21	619	0.4764	0.881	0.29	2820	0.3631	1.265	0.00015	1916	0.4432	0.986	0.84	2436	0.5062	1.018	0.78
exm15320	1	11856378	rs1801133	A/G	MTHFR	NS	10528	0.307753	0.926	0.025	0.86	2737	0.1253	0.977	0.82	619	0.2146	1.069	0.65	2820	0.4103	0.79	0.00016	1916	0.4386	0.954	0.51	2436	0.3389	1.031	0.64
exm-rs960089	8	59708309	rs960089	A/G	TOX	other/GWAS	10528	0.0795891	1.043	0.48	0.92	2737	0.1466	0.968	0.73	619	0.1985	0.829	0.28	2820	0.005219	2.999	0.00017	1916	0.04493	0.997	0.98	2436	0.08145	1.124	0.29
exm2274542	11	124742934	rs144055440	A/C	ROBO3	NS	10528	0.00337972	1.221	0.44	0.63	2737	0.007689	0.765	0.52	619	0.01489	0.745	0.59	2820	0.0007455	8.396	0.00018	1916	0.000768	0.559	0.65	2436	0.0002973	<<	0.59
exm1114477	14	74759006	rs3742801	T/C	ABCD4	NS	10528	0.26607	0.916	0.014	0.77	2737	0.206	1.026	0.75	619	0.2295	0.815	0.19	2820	0.2465	0.764	0.00022	1916	0.2684	0.931	0.37	2436	0.3731	0.981	0.77
exm1108068	14	65053999	rs45482504	C/T	C14orf50	NS	10528	0.0562624	1.114	0.099	0.84	2737	0.05825	1.195	0.19	619	0.0335	0.994	0.99	2820	0.01118	2.256	0.00024	1916	0.0745	1.114	0.4	2436	0.09899	0.945	0.6
exm845189	10	98095688	rs147702836	A/G	DNTT	NS	10524	0.000198913	8.015	0.00024	0.89	2737	0	NA	NA	619	0	NA	NA	2816	0.000747	8.197	0.00026	1916	0	NA	NA	2436	0	NA	NA
exm1512766	19	57723013	rs917340	G/A	ZNF264	NS	10517	0.418347	1.084	0.014	0.74	2729	0.207	1.014	0.87	619	0.5645	1.04	0.75	2819	0.6623	1.266	0.00028	1916	0.3798	1.03	0.67	2434	0.3902	1.039	0.54
exm1512765	19	57723007	rs2074858	G/C	ZNF264	NS	10519	0.418347	1.083	0.015	0.73	2737	0.2078	1.016	0.84	618	0.5647	1.039	0.75	2815	0.6626	1.264	0.00031	1916	0.3798	1.03	0.67	2433	0.3902	1.039	0.54
exm1750070	12	101738482	rs117417637	A/G	UTP20	NS	10528	0.00622929	0.379	0.00036	0.16	2737	0	NA	NA	619	0.001241	<<	0.46	2820	0.02311	0.373	0.00032	1916	0	NA	NA	2436	0	NA	NA
exm1914183	18	50994295	NA	A/G	DCC	NS	10528	6.62691e-05	14.608	0.0012	0.32	2737	0	NA	NA	619	0.001241	1.814	0.67	2820	0	>>	0.00035	1916	0	NA	NA	2436	0	NA	NA
exm-rs4109078	3	3240356	rs4109078	G/A	CRBN	other/AIMS	10528	0.404307	1.045	0.25	0.88	2737	0.133	1.019	0.84	619	0.4938	1.202	0.15	2820	0.8099	1.333	0.00038	1916	0.4478	0.981	0.8	2436	0.2102	0.84	0.033
exm2073549	4	3768805	NA	A/G	ADRA2C	NS	10527	0.000662778	3.428	0.0018	0.18	2737	0	NA	NA	619	0.002481	<<	0.31	2820	0.001988	4.393	0.00038	1916	0	NA	NA	2435	0	NA	NA
exm977800	12	6637845	rs2072374	T/C	NCAPD2	SP	10528	0.220676	1.104	0.0076	0.67	2737	0.07106	1.049	0.71	619	0.3325	1.089	0.49	2820	0.3201	1.245	0.00041	1916	0.2001	1.042	0.63	2436	0.2818	1.001	0.99
exm-rs7805747	7	151407801	rs7805747	A/G	PRKAG2	other/GWAS	10527	0.183059	0.986	0.75	0.8	2737	0.3071	0.98	0.78	619	0.08809	0.811	0.4	2820	0.0002485	30.108	0.00043	1916	0.1736	1.078	0.41	2435	0.2736	0.934	0.34
exm366206	3	180321090	rs145653627	G/T	TTC14	NS	10528	0.000463883	3.63	0.0082	0.28	2737	0.001165	1.436	0.67	619	0	NA	NA	2820	0.000497	10.509	0.00043	1916	0	NA	NA	2436	0	NA	NA
exm-rs2734335	6	31893944	rs139572325	C/T	CFB	other/HLA	10526	0.35167	1.113	0.0013	0.092	2737	0.4739	1.148	0.038	619	0.3623	1.144	0.27	2820	0.1536	1.315	0.00045	1916	0.3007	1.001	0.99	2434	0.4697	1.025	0.69
exm1527212	20	18122912	rs117280420	G/C	PET117	NS	10528	0.00477137	1.745	0.0031	0.81	2737	0	NA	NA	619	0.007444	0.602	0.54	2820	0.01615	1.989	0.00045	1916	0	NA	NA	2436	0.0002973	<<	0.61
exm896421	11	20648364	rs3740870	C/G	SLC6A5	NS	10523	0.0989922	1.075	0.15	0.44	2737	0.0424	0.896	0.52	619	0.1427	1.074	0.68	2817	0.0995	1.377	0.00045	1916	0.09677	1.042	0.73	2434	0.1619	0.948	0.54
exm896422	11	20648380	rs1805091	A/G	SLC6A5	NS	10526	0.169296	1.016	0.71	0.45	2737	0.1372	0.954	0.63	619	0.1935	0.957	0.78	2820	0.1031	1.373	0.00045	1916	0.1671	0.952	0.6	2434	0.2854	0.913	0.2
exm2273258	23	55574773	rs3126259	T/G	USP51	other/AIMS	6551	0.46847	1.119	0.0049	0.47	1630	0.1468	0.969	0.78	452	0.3496	1.508	0.0054	1762	0.7034	1.303	0.0005	1139	0.439	1.115	0.21	1568	0.6572	0.987	0.86
exm-rs12145743	1	156700651	rs12145743	G/T	RRNAD1	other/GWAS	10524	0.185006	1.054	0.18	0.014	2736	0.08228	1.191	0.14	619	0.1836	1.063	0.71	2819	0.1494	1.315	0.00054	1915	0.2164	0.921	0.35	2435	0.3347	0.945	0.4
exm1115675	14	75386576	rs2286913	A/G	RPS6KL1	NS	10527	0.345308	1.096	0.0066	0.88	2737	0.09483	1.171	0.15	619	0.4305	1.044	0.73	2819	0.5037	1.227	0.00057	1916	0.4328	1.093	0.21	2436	0.3873	0.947	0.4
exm1789376	12	992587	rs150532648	G/A	WNK1	NS	10528	0.00344599	2.059	0.00025	0.46	2737	0	NA	NA	619	0	>>	0.069	2820	0.01292	2.007	0.00058	1916	0	NA	NA	2436	0	NA	NA
exm2102808	5	65350441	NA	G/A	ERBB2IP	NS	10528	0.00145792	2.718	0.00059	0.81	2737	0	NA	NA	619	0	NA	NA	2820	0.005467	2.758	0.00058	1916	0	NA	NA	2436	0	NA	NA
exm514211	6	6266854	rs140712764	T/C	F13A1	NS	10528	6.62691e-05	20.787	6.8e-05	0.84	2737	0.000233	8.46	0.038	619	0	NA	NA	2820	0	>>	0.00058	1916	0	NA	NA	2436	0	NA	NA
exm110202	1	156713558	rs4399146	A/G	HDGF	NS	10527	0.197574	1.039	0.32	0.015	2737	0.1233	1.033	0.74	619	0.1849	1.102	0.54	2819	0.1489	1.312	0.0006	1916	0.2208	0.921	0.35	2436	0.3356	0.944	0.39
exm132287	1	186313108	rs58030082	T/C	TPR	NS	10527	0.0161718	1.593	1.3e-05	0.85	2737	0	>>	0.083	619	0.02109	2.405	0.0077	2819	0.05619	1.493	0.0006	1916	0.000384	2.462	0.48	2436	0	>>	0.0021
exm2228264	19	11546269	rs17426435	A/G	PRKCSH	SP	10524	0.0487336	0.839	0.018	0.069	2737	0.02004	0.924	0.75	618	0.02861	1.01	0.98	2820	0.02858	0.455	0.00062	1913	0.1247	0.887	0.27	2436	0.05559	0.918	0.54
exm1886391	17	39974440	rs117897485	T/C	FKBP10	NS	10527	0.000331389	4.551	0.0032	0.92	2737	0	NA	NA	619	0.001241	<<	0.42	2819	0.0009945	6.297	0.00065	1916	0	NA	NA	2436	0	NA	NA
exm897611	11	28057897	rs141828077	A/G	KIF18A	NS	10528	0.00960901	0.48	0.00029	0.53	2737	0.000233	<<	0.53	619	0.01489	0.57	0.34	2820	0.03255	0.476	0.00069	1916	0	NA	NA	2436	0.0002973	<<	0.53
exm1123584	14	94417531	rs11555542	C/T	ASB2	NS	10528	0.0273691	1.007	0.94	0.015	2737	0.01654	0.798	0.42	619	0.02357	1.024	0.95	2820	0	>>	0.00075	1916	0.04685	0.994	0.97	2436	0.05975	1.017	0.9
exm2271459	11	8876852	rs2742552	C/T	ST5	other	10527	0.492247	0.978	0.46	0.21	2737	0.5154	1.229	0.0021	619	0.4777	1.177	0.17	2819	0.4908	0.819	0.00075	1916	0.4988	0.961	0.58	2436	0.4628	0.947	0.38
exm1160998	15	50773787	rs3743044	G/A	USP8	NS	10527	0.0699894	1.13	0.041	0.22	2737	0.01864	0.827	0.47	618	0.107	0.813	0.32	2820	0.1759	1.283	0.00079	1916	0.03303	0.866	0.49	2436	0.02854	1.169	0.38
exm953181	11	107675467	rs184602466	T/C	SLC35F2	NS	10528	0.000795229	0.914	0.87	0.036	2737	0	NA	NA	619	0.001241	<<	0.44	2820	0	>>	0.00079	1916	0.000768	<<	0.12	2436	0.002675	0.253	0.16
exm-rs2305707	15	51569410	rs2305707	G/A	CYP19A1	other/GWAS	10528	0.297548	1.074	0.044	0.75	2737	0.4473	1.079	0.25	619	0.2531	0.867	0.32	2820	0.3544	1.23	0.00081	1916	0.1567	1.102	0.3	2436	0.1581	0.866	0.1
exm1089426	14	23511579	rs34457782	A/G	PSMB11	NS	10528	0.0125249	0.578	0.00081	0.83	2737	0.00233	0.332	0.27	619	0.01613	0.677	0.47	2820	0.03231	0.49	0.00081	1916	0.003072	0.741	0.66	2436	0.008323	0.849	0.65
exm-rs4151664	6	31920873	rs189793457	T/C	RDBP	other/HLA	10528	0.0662691	1.199	0.0045	0.63	2737	0.1491	1.262	0.0087	619	0.03474	1.761	0.04	2820	0.001243	5.319	0.00084	1916	0.05184	1.039	0.81	2436	0.05707	0.958	0.75
exm-rs4784227	16	52599188	rs4784227	T/C	TOX3	other/GWAS	10518	0.206261	1.268	6e-11	0.049	2737	0.08038	1.26	0.041	609	0.3186	1.183	0.19	2820	0.2266	1.256	0.00084	1916	0.2938	1.34	7.7e-05	2436	0.2482	1.268	0.00055
exm-rs7746553	6	31895973	rs7746553	G/C	CFB	other/HLA	10528	0.166004	1.131	0.0031	0.016	2737	0.2661	1.171	0.033	619	0.2084	1.082	0.57	2820	0.08623	1.377	0.00084	1916	0.1252	1.024	0.82	2436	0.1552	0.977	0.79
exm2256916	5	129863694	rs1009686	C/A	CHSY3	other	10527	0.424443	0.944	0.07	0.51	2737	0.5408	0.969	0.64	619	0.428	1.012	0.92	2820	0.4257	0.817	0.00085	1915	0.4078	1.103	0.17	2436	0.2866	0.94	0.38
exm136436	1	201052310	rs12742169	T/A	CACNA1S	NS	10518	0.141133	1.07	0.15	0.46	2737	0.09459	1.047	0.69	619	0.1017	0.74	0.2	2817	0.0007466	8.774	0.00087	1913	0.1709	1.182	0.059	2432	0.355	1.021	0.75
exm814685	10	24813550	rs151027148	A/G	KIAA1217	NS	10527	0.0017895	1.959	0.013	0.55	2737	0.000233	<<	0.64	619	0.008685	0.51	0.4	2820	0.004722	2.663	0.00089	1915	0	NA	NA	2436	0	NA	NA
exm-rs16861990	1	169135127	rs16861990	C/A	NME7	other/GWAS	10528	0.0538105	1.089	0.2	0.33	2737	0.02703	1.2	0.34	619	0.04467	0.778	0.43	2820	0.07356	1.416	0.00091	1916	0.05722	0.966	0.82	2436	0.06391	0.797	0.097
exm653936	7	122635349	rs28371574	C/T	TAS2R16	NS	10528	0.000927767	2.397	0.021	0.24	2737	0.001165	<<	0.23	619	0	NA	NA	2820	0.001988	4.068	0.00094	1916	0.000384	<<	0.47	2436	0	NA	NA
exm1066469	13	43463378	rs79111014	T/C	EPSTI1	SP	10528	0.0349238	1.268	0.0023	0.59	2737	0.002563	1.047	0.94	619	0.09553	1.156	0.47	2820	0.09294	1.358	0.001	1916	0.02304	1.065	0.79	2436	0.001486	0.566	0.63
exm209012	2	88407936	rs145275251	T/C	SMYD1	NS	10528	0.000198807	3.556	0.082	0.64	2737	0	>>	0.032	619	0	NA	NA	2820	0	>>	0.001	1916	0.000768	<<	0.12	2436	0.0002973	<<	0.54
exm2277394	23	100658972	rs104894833	G/C	GLA	SP	6551	0.000420404	5.892	0.0015	0.37	1630	0	NA	NA	452	0	NA	NA	1762	0.001572	6.294	0.001	1139	0	NA	NA	1568	0	NA	NA
exm1659933	23	139587069	NA	G/C	SOX3	NS	6551	0.00434417	1.746	0.016	0.072	1630	0.0004812	5.806	0.097	452	0	>>	0.37	1762	0.005241	3.205	0.0011	1139	0.01714	0.806	0.54	1568	0.001229	1.957	0.46
exm1785790	1	27677375	rs187197622	A/G	SYTL1	NS	10528	0.000795229	2.974	0.0035	0.038	2737	0	NA	NA	619	0.002481	<<	0.31	2820	0.002485	3.597	0.0011	1916	0	NA	NA	2436	0	NA	NA
exm694629	8	32621630	rs80127039	T/C	NRG1	NS	10528	0.00815109	0.948	0.75	0.034	2737	0.004427	0.668	0.47	619	0.004963	0.971	0.97	2820	0	>>	0.0011	1916	0.01114	0.7	0.34	2436	0.02111	0.991	0.97
exm841649	10	93668408	rs10881994	T/C	FGFBP3	NS	10513	0.0817977	1.099	0.086	0.66	2731	0.02284	0.835	0.45	619	0.1129	1.127	0.51	2820	0.1603	1.288	0.0011	1909	0.05111	0.955	0.78	2434	0.07937	0.923	0.5
exm1287816	17	7402600	rs2228129	T/C	POLR2A	SP	10528	0.239894	0.96	0.29	0.14	2737	0.3849	1.001	0.99	619	0.1935	1.068	0.67	2820	0.1481	0.746	0.0012	1916	0.1486	1.214	0.041	2436	0.2464	0.911	0.21
exm140215	1	203768328	rs7552670	C/T	ZBED6	NS	10527	0.193929	1.13	0.0019	0.49	2737	0.05895	1.204	0.16	619	0.2643	1.114	0.45	2820	0.3116	1.224	0.0012	1915	0.2744	1.104	0.21	2436	0.1463	0.98	0.82
exm1522454	20	3686552	NA	T/C	SIGLEC1	NS	10528	0.000132538	5.152	0.035	0.59	2737	0	NA	NA	619	0.001241	<<	0.45	2820	0	>>	0.0012	1916	0.000384	<<	0.46	2436	0	NA	NA
exm1631843	23	23928535	rs78304044	T/C	CXorf58	SP	6551	0.00280269	2.329	0.0019	0.94	1630	0	NA	NA	452	0	NA	NA	1762	0.01048	2.428	0.0012	1139	0	NA	NA	1568	0	NA	NA
exm2266176	6	31882024	rs115485758	A/G	ZBTB12	other	10527	0.391569	1.122	0.00041	0.27	2737	0.5093	1.168	0.021	618	0.3843	1.164	0.2	2820	0.1963	1.262	0.0012	1916	0.3376	1.084	0.27	2436	0.5184	0.997	0.96
exm2264133	5	136608159	rs2961646	A/C	SPOCK1	other	10518	0.495423	0.935	0.032	0.4	2730	0.4192	0.985	0.83	619	0.7382	0.972	0.84	2819	0.5065	0.824	0.0013	1916	0.4877	0.911	0.18	2434	0.5271	1.04	0.53
exm2271763	12	80133070	rs2694660	G/T	PPP1R12A	other	10528	0.156925	0.886	0.01	0.11	2737	0.09949	1.038	0.74	619	0.3958	0.956	0.75	2820	0.327	0.81	0.0013	1916	0.08372	0.92	0.53	2436	0.02616	0.865	0.49
exm973773	12	1553797	rs12319376	G/A	ERC1	NS	10528	0.177071	1.072	0.19	0.03	2737	0.5158	1.077	0.28	619	0.03474	1.041	0.9	2820	0.01218	2.029	0.0013	1916	0.07335	0.952	0.71	2436	0.05648	0.954	0.73
exm2258227	7	15236392	rs10274730	T/C	AGMO	other	10525	0.480711	1.073	0.024	0.23	2735	0.4371	1.08	0.24	619	0.5236	1.083	0.51	2819	0.5997	1.217	0.0014	1916	0.4163	0.945	0.42	2436	0.4337	1.039	0.55
exm140218	1	203769532	rs7540041	A/G	ZBED6	NS	10528	0.193771	1.129	0.002	0.47	2737	0.05871	1.209	0.15	619	0.263	1.123	0.42	2820	0.3116	1.22	0.0015	1916	0.2746	1.104	0.21	2436	0.146	0.977	0.79
exm1069338	13	51417535	rs898861	A/G	DLEU7	NS	10526	0.223025	1.079	0.038	0.61	2735	0.1166	0.924	0.45	619	0.3883	1.087	0.51	2820	0.3268	1.217	0.0016	1916	0.2116	0.961	0.64	2436	0.2039	1.085	0.29
exm1410535	19	4816627	NA	G/T	TICAM1	NS	10528	0.001723	<<	0.001	NA	2737	0	NA	NA	619	0.002481	<<	0.27	2820	0.005964	<<	0.0016	1916	0	NA	NA	2436	0	NA	NA
exm1572414	21	43187167	rs6586239	C/G	RIPK4	NS	10488	0.107361	1.075	0.16	0.3	2723	0.185	0.942	0.49	617	0.05831	1.308	0.28	2816	0.0002485	15.913	0.0016	1904	0.0983	1.174	0.15	2428	0.1552	1.069	0.42
exm1832771	15	48559813	rs78648980	T/C	SLC12A1	NS	10528	0.0170311	1.301	0.016	0.39	2737	0	>>	0.044	619	0.08933	0.928	0.73	2820	0.04473	1.499	0.0016	1916	0	>>	0.45	2436	0.001486	0.732	0.8
exm1963514	20	33447262	NA	G/A	GGT7	NS	10528	0.00072896	3.071	0.0037	0.73	2737	0	NA	NA	619	0.002481	0.912	0.94	2820	0.002237	3.689	0.0016	1916	0	NA	NA	2436	0	NA	NA
exm2075787	4	54347978	rs188640593	T/C	LNX1	NS	10528	0.000132538	6.726	0.0078	0.44	2737	0	NA	NA	619	0.001241	1.626	0.73	2820	0.0002485	14.757	0.0016	1916	0	NA	NA	2436	0	NA	NA
exm407191	4	77053834	rs61750814	C/T	NUP54	NS	10528	0.139165	0.991	0.85	0.99	2737	0.2062	0.871	0.1	619	0.07072	1.048	0.84	2820	0.01118	2.01	0.0016	1916	0.2216	0.923	0.35	2436	0.1593	1.064	0.46
exm-rs2763982	6	31872551	rs114642416	C/G	ZBTB12	other/HLA	10527	0.407675	0.925	0.024	0.64	2736	0.0979	0.903	0.37	619	0.4591	0.896	0.36	2820	0.7142	0.819	0.0017	1916	0.4904	0.958	0.55	2436	0.3597	1.04	0.54
exm-rs3790567	1	67822377	rs3790567	A/G	IL12RB2	other/GWAS	10528	0.391783	1.01	0.76	0.46	2737	0.6911	0.856	0.035	619	0.4045	0.865	0.24	2820	0.2348	1.244	0.0017	1916	0.2995	1.008	0.92	2436	0.2661	1.007	0.92
exm-rs8014204	14	75322794	rs8014204	G/A	PROX2	other/GWAS	10527	0.385604	1.075	0.03	0.79	2737	0.1179	1.18	0.098	619	0.4628	1.013	0.92	2819	0.5062	1.206	0.0017	1916	0.4923	1.092	0.21	2436	0.4819	0.907	0.13
exm2234732	20	61872136	rs6090327	C/T	NKAIN4	SP	10528	0.25063	1.073	0.049	0.33	2737	0.2733	1.083	0.28	619	0.371	0.781	0.057	2820	0.3186	1.217	0.0017	1916	0.1782	1.021	0.83	2436	0.1677	1.017	0.85
exm2267933	16	24088428	rs12930629	A/G	PRKCB	other/AIMS	10528	0.171438	1.068	0.18	0.011	2737	0.4585	1.035	0.61	619	0.04094	1.165	0.6	2820	0.04076	1.512	0.0017	1916	0.0768	1.021	0.88	2436	0.06599	0.932	0.58
exm2273088	23	12419996	rs2407834	G/T	FRMPD4	other	6550	0.479254	0.964	0.32	0.92	1630	0.3527	1.036	0.64	452	0.3983	0.894	0.44	1762	0.6593	0.801	0.0017	1138	0.4218	0.995	0.96	1568	0.4902	1.083	0.27
exm2274688	14	53245082	rs192453247	C/A	GNPNAT1	NS	10528	0.000198807	5.534	0.0059	0.85	2737	0	NA	NA	619	0.001241	<<	0.45	2820	0.000497	8.701	0.0017	1916	0	NA	NA	2436	0	NA	NA
exm367360	3	183508714	rs74496163	A/G	YEATS2	NS	10490	0.051497	0.738	8.7e-05	0.35	2733	0.01284	0.521	0.084	607	0.1738	0.781	0.15	2805	0.1201	0.728	0.0017	1913	0.03387	0.788	0.26	2432	0.003874	0.69	0.53
exm-rs2294883	6	32367451	rs115856775	T/A	C6orf10	other/HLA	10525	0.265049	0.905	0.0062	0.56	2737	0.1601	1.071	0.43	619	0.3002	0.7	0.0082	2817	0.4607	0.828	0.0018	1916	0.2331	0.996	0.96	2436	0.1816	0.927	0.37
exm1556718	20	61162267	rs6062251	T/C	C20orf166	NS	10526	0.477399	1.048	0.15	0.02	2737	0.3264	1.024	0.74	619	0.706	0.87	0.34	2819	0.6977	1.233	0.0018	1915	0.429	0.956	0.53	2436	0.3894	1.042	0.52
exm2221874	13	95899303	rs11568689	C/G	ABCC4	NS	10528	0.000463883	2.84	0.039	0.0052	2737	0	NA	NA	619	0.003722	0.617	0.68	2820	0.000994	5.933	0.0018	1916	0	NA	NA	2436	0	NA	NA
exm2254371	20	61170103	rs4635599	C/T	C20orf166	other	10527	0.479454	0.965	0.27	0.076	2736	0.5317	1.016	0.81	619	0.2891	1.139	0.37	2820	0.3049	0.812	0.0018	1916	0.5611	1.065	0.38	2436	0.604	0.947	0.4
exm2273328	1	95363001	rs3789699	C/T	CNN3	other	10524	0.0714096	1.045	0.46	0.81	2737	0.07456	0.837	0.18	619	0.04715	0.835	0.55	2817	0.04331	1.51	0.0018	1916	0.06912	0.962	0.79	2435	0.1086	1.057	0.57
exm-rs7774434	6	32657578	rs7774434	C/T	HLA-DQA1	other/GWAS	10524	0.466322	0.941	0.051	0.071	2735	0.3776	0.96	0.56	619	0.4504	1.01	0.93	2818	0.5721	0.832	0.0019	1916	0.5419	1.071	0.33	2436	0.3983	0.939	0.32
exm1801776	1	39798037	rs138213632	G/T	MACF1	NS	10528	0.00715706	0.485	0.0024	0.73	2737	0	NA	NA	619	0	>>	0.21	2820	0.02684	0.469	0.0019	1916	0	NA	NA	2436	0	NA	NA
exm2052390	3	44943399	rs142655195	A/C	TGM4	NS	10528	0.0214712	0.66	0.00077	0.55	2737	0.000466	1.592	0.7	619	0.004963	<<	0.11	2820	0.07903	0.676	0.0019	1916	0	NA	NA	2436	0	NA	NA
exm219117	2	108994808	rs1402467	G/C	SULT1C4	NS	10527	0.365522	1.088	0.021	0.76	2737	0.7139	1.034	0.67	619	0.2122	0.919	0.57	2819	0.2402	1.236	0.0019	1916	0.1989	1.054	0.54	2436	0.2366	1.055	0.47
exm2265533	3	175592927	rs7642805	A/G	NAALADL2	other	10516	0.473789	1.049	0.14	0.7	2735	0.4851	0.944	0.39	619	0.5124	1.205	0.13	2812	0.2852	1.221	0.0019	1916	0.4754	0.957	0.53	2434	0.6738	1.017	0.8
exm2266603	8	29247126	rs1708789	A/G	DUSP4	other	10528	0.449105	1.06	0.064	0.68	2737	0.5373	0.974	0.69	619	0.505	0.865	0.23	2820	0.5	1.203	0.0019	1916	0.3602	1.002	0.97	2436	0.3312	1.093	0.17
S1.5 Latinos
							Overall					African American				Native Hawaiian				Japanese American				Latino				European American
SNP	Chr	Position	SNP ID	A1/A2	Gene	Type	No. of samples	MAF	OR	P	P_Het	No. of samples	MAF	OR	P	No. of samples	MAF	OR	P	No. of samples	MAF	OR	P	No. of samples	MAF	OR	P	No. of samples	MAF	OR	P
exm159571	1	233122127	rs41309639	T/C	PCNXL2	NS	10528	0.208814	0.886	0.002	0.79	2737	0.2402	0.976	0.76	619	0.1526	1.151	0.4	2820	0.1884	0.871	0.077	1916	0.1682	0.646	2.7e-05	2436	0.2381	0.911	0.21
exm-rs11047102	12	23946146	rs11047102	T/C	SOX5	other/GWAS	10523	0.0658976	1.104	0.092	0.55	2737	0.02586	1.132	0.54	617	0.03607	0.594	0.18	2818	0.05721	0.755	0.05	1916	0.1114	1.515	3.6e-05	2435	0.09929	1.058	0.57
exm1020532	12	69113390	rs142470451	C/T	NUP107	NS	10528	0.000795229	2.554	0.019	0.28	2737	0.000699	2.458	0.31	619	0.001241	<<	0.43	2820	0	NA	NA	1916	0	>>	4.6e-05	2436	0.002378	0.699	0.6
exm941422	11	74883577	rs12422149	A/G	SLCO2B1	NS	10527	0.218158	0.957	0.26	0.42	2736	0.089	1.264	0.029	619	0.1588	0.936	0.69	2820	0.3661	0.988	0.84	1916	0.3656	0.732	5.3e-05	2436	0.1061	1.138	0.2
exm240336	2	170090014	rs143413559	C/T	LRP2	NS	10528	0	>>	0.00014	0.62	2737	0	NA	NA	619	0	NA	NA	2820	0	NA	NA	1916	0	>>	5.6e-05	2436	0	NA	NA
exm-rs10038113	5	25902342	rs10038113	C/T	NOT_FOUND	other/GWAS	10528	0.476342	0.939	0.046	0.42	2737	0.5231	1.065	0.34	619	0.5434	0.802	0.063	2820	0.5127	1.07	0.26	1916	0.4028	0.744	5.9e-05	2436	0.4141	0.9	0.1
exm470283	5	109159494	rs112884546	A/T	MAN2A1	NS	10528	0.00675944	1.353	0.11	0.97	2737	0.02353	1.012	0.96	619	0	>>	0.42	2820	0	NA	NA	1916	0.000384	20.98	6.4e-05	2436	0	>>	0.24
exm470311	5	109190943	rs112984105	T/C	MAN2A1	NS	10528	0.00662691	1.346	0.13	0.86	2737	0.02307	0.998	0.99	619	0	>>	0.42	2820	0	NA	NA	1916	0.000384	20.98	6.4e-05	2436	0	>>	0.24
exm1441044	19	17170885	rs1130222	T/C	HAUS8	NS	10524	0.451731	0.93	0.02	0.96	2737	0.4341	0.98	0.76	618	0.4328	0.894	0.37	2818	0.4244	1.016	0.8	1915	0.5546	0.749	6.6e-05	2436	0.4319	0.959	0.51
exm1340054	17	56389516	rs144106922	T/C	BZRAP1	NS	10528	0.000463883	3.193	0.016	0.25	2737	0.000466	1.882	0.6	619	0.001241	<<	0.48	2820	0	NA	NA	1916	0	>>	7.1e-05	2436	0.001189	0.52	0.55
exm-rs4784227	16	52599188	rs4784227	T/C	TOX3	other/GWAS	10518	0.206261	1.268	6e-11	0.049	2737	0.08038	1.26	0.041	609	0.3186	1.183	0.19	2820	0.2266	1.256	0.00084	1916	0.2938	1.34	7.7e-05	2436	0.2482	1.268	0.00055
exm1380503	18	28713994	rs28620831	G/A	DSC1	NS	10528	0.0308814	1.249	0.01	0.2	2737	0.04753	1.19	0.24	619	0.01985	0.599	0.33	2820	0.0002485	1.676	0.72	1916	0.0192	2.216	0.0001	2436	0.05797	1.117	0.4
exm1488544	19	49376683	rs45533432	G/A	PPP1R15A	NS	10525	0.00351273	1.479	0.081	0.94	2735	0.002097	0.805	0.78	619	0.002481	3.12	0.2	2819	0	NA	NA	1916	0.00384	4.157	0.00015	2436	0.009512	0.766	0.45
exm382351	4	2195009	rs11725880	A/G	POLN	NS	10528	0.00503645	1.267	0.23	0.19	2737	0.00466	0.328	0.12	619	0.003722	2.056	0.39	2820	0	>>	0.15	1916	0.00192	5.96	0.00015	2436	0.01427	1.003	0.99
exm1361399	17	76565555	rs144524797	T/C	DNAH17	NS	10528	0.00072896	2.098	0.086	0.2	2737	0.001165	<<	0.16	619	0.001241	<<	0.5	2820	0	NA	NA	1916	0.000384	18.323	0.00016	2436	0.001189	1.067	0.94
exm1428562	19	11508192	rs111956126	A/G	RGL3	ST	10528	0.000331345	4.132	0.0062	0.66	2737	0	NA	NA	619	0	>>	0.14	2820	0	NA	NA	1916	0	>>	0.00024	2436	0.001486	1.003	1
exm16091	1	12175658	rs2230624	A/G	TNFRSF8	NS	10528	0.0038436	1.262	0.31	0.49	2737	0.003262	1.529	0.39	619	0.007444	<<	0.069	2820	0	NA	NA	1916	0.001536	6.549	0.00026	2436	0.01011	0.856	0.64
exm995483	12	42863262	rs34837068	G/A	PRICKLE1	NS	10528	0.0206759	1.178	0.11	0.62	2737	0.005592	1.413	0.38	619	0.09057	1.086	0.69	2820	0.04622	0.976	0.86	1916	0.009985	2.562	0.00028	2436	0.0008918	2.726	0.24
exm2273249	23	42923587	rs5991566	C/T	PPP1R2P9	other/AIMS	6549	0.235558	1.158	0.0026	0.26	1629	0.5053	1.02	0.79	452	0.06356	1.303	0.36	1762	0.2683	1.166	0.047	1138	0.0563	1.847	0.0003	1568	0.01843	1.154	0.6
exm423675	4	126373018	rs111423173	T/C	FAT4	NS	10528	0.00271703	1.926	0.0052	0.52	2737	0.002097	1.574	0.45	619	0.002481	<0.001	0.33	2820	0	NA	NA	1916	0.005376	3.306	0.00038	2436	0.004756	1.217	0.64
exm992273	12	30906358	rs17688567	A/G	CAPRIN2	NS	10528	0.0326044	0.857	0.082	0.75	2737	0.01421	1.449	0.13	619	0.02605	0.876	0.75	2820	0	>>	0.086	1916	0.06106	0.541	0.00039	2436	0.07461	0.958	0.72
exm2256242	4	100789312	rs191421902	A/G	DAPP1	S	10515	0.000397984	2.678	0.067	0.68	2734	0	NA	NA	619	0	>>	0.15	2816	0	NA	NA	1912	0	>>	0.0004	2434	0.001786	0.372	0.34
exm2276233	12	15734702	rs144347297	A/C	PTPRO	NS	10528	0.00139165	3.331	2.9e-05	0.16	2737	0.001864	2.62	0.067	619	0	NA	NA	2820	0	NA	NA	1916	0.004992	3.491	0.0004	2436	0	>>	0.08
exm307902	3	46501168	rs141854619	T/A	LTF	NS	10528	0.00762094	1.29	0.16	0.7	2737	0.02656	1.142	0.5	619	0.001241	2.1	0.61	2820	0	NA	NA	1916	0	>>	0.0004	2436	0	NA	NA
exm-rs1999805	6	152068364	rs1999805	T/C	ESR1	other/GWAS	10528	0.44387	0.999	0.98	0.55	2737	0.5277	1.101	0.14	619	0.2667	0.807	0.16	2820	0.2507	0.935	0.33	1916	0.49	1.288	0.00041	2436	0.5746	0.828	0.0027
exm2252029	14	99863065	rs2295697	C/T	SETD3	other	10524	0.4941	0.966	0.27	0.79	2734	0.6457	0.992	0.9	619	0.3747	1.101	0.43	2819	0.4915	0.987	0.83	1916	0.3963	0.775	0.00043	2436	0.4081	1.063	0.34
exm13829	1	11009844	rs138476809	A/G	C1orf127	NS	10527	0.00709173	1.003	0.99	0.93	2737	0.02423	0.843	0.45	619	0	NA	NA	2820	0	NA	NA	1915	0.0003843	16.398	0.00044	2436	0.0005945	<<	0.33
exm2266534	7	72825125	rs4717763	G/A	FZD9	other/AIMS	10517	0.413571	1.093	0.0072	0.9	2736	0.1739	1.041	0.66	618	0.3586	0.993	0.96	2813	0.4786	1.006	0.92	1915	0.5242	1.281	0.00044	2435	0.5693	1.095	0.16
exm987208	12	14993439	rs11276	T/C	ART4	NS	10528	0.26839	0.916	0.017	0.2	2737	0.2815	1.085	0.26	619	0.1638	1.171	0.36	2820	0.1093	0.86	0.13	1916	0.3602	0.767	0.00044	2436	0.396	0.926	0.24
exm987253	12	15035081	rs4236	C/T	MGP	NS	10528	0.343472	0.906	0.0052	0.43	2737	0.5114	0.974	0.69	619	0.1824	1.143	0.42	2820	0.1332	0.869	0.12	1916	0.3786	0.771	0.00046	2436	0.3921	0.958	0.51
exm89337	1	120384066	rs140014891	T/C	NBPF7	NS	10527	0.00543478	1.543	0.016	0.22	2737	0.003961	2.214	0.044	619	0.003722	1.796	0.48	2820	0.0002485	<<	0.37	1916	0.003456	3.943	0.00048	2435	0.01547	0.967	0.9
exm542795	6	36867372	rs140986907	A/C	C6orf89	NS	10528	0.00205434	1.553	0.13	0.2	2737	0.001631	0.533	0.55	619	0.001241	<<	0.41	2820	0	NA	NA	1916	0.000768	9.695	0.00052	2436	0.006243	1.24	0.57
exm1103927	14	57749700	rs10140245	C/A	MUDENG	NS	10528	0.044334	0.895	0.24	0.37	2737	0.1503	0.829	0.06	619	0.002481	<<	0.28	2820	0	NA	NA	1916	0.00576	3.141	0.00054	2436	0.002081	0.519	0.43
exm837792	10	82331231	rs12257493	C/T	SH2D4B	NS	10528	0.00941021	0.955	0.8	0.022	2737	0.03215	0.846	0.39	619	0	NA	NA	2820	0	NA	NA	1916	0	>>	0.00056	2436	0.001189	1.043	0.96
exm837798	10	82331296	rs77983942	T/G	SH2D4B	NS	10528	0.00941021	0.955	0.8	0.022	2737	0.03215	0.846	0.39	619	0	NA	NA	2820	0	NA	NA	1916	0	>>	0.00056	2436	0.001189	1.043	0.96
exm382378	4	2210057	NA	G/T	POLN	NS	10528	0.000463883	3.197	0.014	1	2737	0	NA	NA	619	0	NA	NA	2820	0	NA	NA	1916	0.001152	7.132	0.00058	2436	0.001189	<<	0.19
exm285005	2	242690675	rs1106639	A/G	D2HGDH	NS	10528	0.222531	0.988	0.75	0.47	2737	0.2931	1.02	0.79	619	0.1315	1.12	0.53	2820	0.1359	1.153	0.094	1916	0.2193	0.731	0.00063	2436	0.2604	1.004	0.95
exm-rs12989701	2	127887985	rs12989701	A/C	BIN1	other/GWAS	10528	0.0925779	0.907	0.078	0.38	2737	0.1228	0.859	0.15	619	0.1017	0.829	0.37	2820	0.005964	1.205	0.6	1916	0.09716	0.638	0.00065	2436	0.1519	1.101	0.25
exm821736	10	46121704	rs34082391	C/T	ANUBL1	NS	10527	0.032211	1.042	0.68	0.83	2736	0.1063	1.137	0.22	619	0	>>	0.012	2820	0	>>	0.84	1916	0.009985	0.146	0.00065	2436	0.001189	0.291	0.28
exm936011	11	68840399	rs61746574	A/G	TPCN2	NS	10528	0.0944334	0.999	0.98	0.77	2737	0.07735	1.126	0.31	619	0.04591	2.079	0.0031	2820	0.07753	1.042	0.72	1916	0.1283	0.675	0.00065	2436	0.1219	1.102	0.29
exm544061	6	38854645	rs116401640	G/A	DNAH8	NS	10528	0.00377734	1.529	0.074	0.3	2737	0.01305	1.331	0.27	619	0	NA	NA	2820	0	NA	NA	1916	0	>>	0.00069	2436	0.0002973	<<	0.53
exm-rs11631761	15	92301298	rs11631761	A/G	SLCO3A1	other/AIMS	10528	0.492975	1.055	0.12	0.85	2737	0.7833	1.096	0.27	619	0.4876	1.084	0.53	2820	0.2048	0.967	0.65	1916	0.3756	1.284	0.0007	2436	0.5595	0.965	0.58
exm854347	10	105891932	rs75941862	C/T	WDR96	NS	10528	0.00437376	1.231	0.39	0.14	2737	0.01538	0.939	0.82	619	0	NA	NA	2820	0	NA	NA	1916	0	>>	0.0007	2436	0	>>	0.2
exm2271745	12	65810174	rs1494505	C/T	MSRB3	other	10528	0.483168	1.035	0.28	0.27	2737	0.445	0.989	0.86	619	0.6514	1.001	0.99	2820	0.4048	1.028	0.66	1916	0.4447	1.27	0.00071	2436	0.615	0.908	0.14
exm1044184	12	121592689	rs17525809	C/T	P2RX7	NS	10528	0.0654076	0.968	0.59	0.27	2737	0.01957	0.744	0.26	619	0.06328	1.331	0.2	2820	0.1272	0.808	0.023	1916	0.03879	1.699	0.00073	2436	0.07105	0.924	0.52
exm1247524	16	67037054	rs61744399	C/A	CES4A	NS	10528	0.279788	1.057	0.18	0.92	2737	0.6235	0.957	0.54	619	0.2308	0.873	0.37	2820	0.1869	1.004	0.96	1916	0.1475	1.355	0.00076	2436	0.06659	1.201	0.13
exm139715	1	203194834	rs137852607	T/C	CHIT1	NS	10528	0.00198807	2.306	0.0013	0.52	2737	0.001864	1.867	0.31	619	0.001241	2.037	0.62	2820	0.0002485	<<	0.53	1916	0.002304	4.72	0.00076	2436	0.004162	1.713	0.18
exm34246	1	26582091	rs3795686	A/G	CEP85	NS	10528	0.210007	1.077	0.048	0.44	2737	0.1002	1.185	0.11	619	0.1923	1.19	0.28	2820	0.2187	0.912	0.21	1916	0.2665	1.289	0.00076	2436	0.3002	1.001	0.99
exm-rs1202199	6	20156174	rs1202199	T/C	MBOAT1	other/GWAS	10528	0.0911862	1.159	0.0075	0.85	2737	0.2004	1.01	0.9	619	0.03102	0.579	0.2	2820	0	>>	0.53	1916	0.06951	1.492	0.00077	2436	0.09215	1.277	0.017
exm131189	1	185878632	rs60502467	G/A	HMCN1	NS	10528	0.00265076	1.609	0.081	0.69	2737	0.008155	0.825	0.63	619	0	>>	0.19	2820	0	NA	NA	1916	0.001152	6.834	0.00081	2436	0.0005945	1.523	0.74
exm166640	1	247769412	rs147517990	A/C	OR2G3	NS	10528	0.000861498	2.888	0.0046	0.26	2737	0.001864	0.833	0.82	619	0	NA	NA	2820	0	NA	NA	1916	0.001536	5.851	0.00081	2436	0.0002973	5.036	0.15
exm-rs2941740	6	152009638	rs2941740	C/T	ESR1	other/GWAS	10527	0.311332	1.029	0.41	0.47	2736	0.3681	1.056	0.42	619	0.1725	0.784	0.18	2820	0.1402	1.083	0.34	1916	0.3671	1.275	0.00085	2436	0.4337	0.867	0.022
exm1317579	17	38068621	rs12450091	C/T	GSDMB	NS	10528	0.0638834	0.772	0.0002	0.24	2737	0.004194	1.168	0.76	619	0.01117	1.249	0.68	2820	0.07977	0.76	0.02	1916	0.2254	0.736	0.00086	2436	0.008621	1.158	0.7
exm-rs12525163	6	152040291	rs12525163	C/T	ESR1	other/GWAS	10528	0.231345	1.053	0.16	0.65	2737	0.2535	1.093	0.22	619	0.1352	0.776	0.19	2820	0.16	1.007	0.93	1916	0.2888	1.284	0.00087	2436	0.2669	0.942	0.39
exm1106334	14	62551085	rs74675259	A/G	SYT16	NS	10500	0.00432353	1.556	0.052	0.18	2737	0.01491	1.394	0.17	619	0	NA	NA	2798	0	NA	NA	1915	0	>>	0.00087	2431	0.0002982	<<	0.52
exm2266980	10	34237166	rs11009601	A/G	PARD3	other	10527	0.402452	0.945	0.081	0.51	2736	0.3805	1.029	0.67	619	0.4876	0.972	0.82	2820	0.55	0.963	0.53	1916	0.3111	0.765	0.00089	2436	0.3044	0.975	0.71
exm254779	2	197576939	rs80346810	A/G	CCDC150	NS	10528	0.010603	1.256	0.15	0.56	2737	0.03635	1.13	0.48	619	0	NA	NA	2820	0	NA	NA	1916	0.000768	9.32	0.0009	2436	0.0005945	1.443	0.74
exm1373001	18	5397205	rs142853345	A/G	EPB41L3	NS	10528	0.000198807	3.856	0.042	0.94	2737	0	NA	NA	619	0.001241	1.729	0.7	2820	0	NA	NA	1916	0	>>	0.00092	2436	0.0005945	<<	0.29
exm34638	1	26670444	rs36024412	T/G	AIM1L	NS	10521	0.22755	1.065	0.084	0.96	2736	0.1613	1.1	0.28	619	0.1774	1.182	0.31	2817	0.2206	0.934	0.35	1915	0.2698	1.284	0.00098	2434	0.2997	0.983	0.8
exm2252636	16	57188397	rs74544530	A/G	FAM192A	S	10527	0.010603	0.974	0.88	0.64	2736	0.03611	0.937	0.72	619	0.001241	<<	0.27	2820	0.0002485	<<	0.54	1916	0	>>	0.001	2436	0.0008918	<<	0.21
exm2261143	2	196866420	rs6434811	C/T	DNAH7	other/AIMS	10527	0.345241	0.958	0.27	0.77	2737	0.6533	0.948	0.49	618	0.4602	1.241	0.1	2820	0.2818	1.024	0.72	1916	0.2012	0.73	0.001	2436	0.1121	0.945	0.59
exm2266922	9	93080194	rs2246522	A/G	LOC340515	other/AIMS	10528	0.457058	1.042	0.22	0.93	2737	0.1705	1.05	0.59	619	0.4181	0.897	0.4	2820	0.6044	1.097	0.13	1916	0.5238	1.265	0.001	2436	0.604	0.868	0.026
exm451440	5	38527308	rs3729734	A/G	LIFR	NS	10528	0.0184228	1.173	0.14	0.2	2737	0.01491	1.199	0.48	619	0.009926	1.06	0.93	2820	0.000497	<0.001	0.18	1916	0.01843	1.991	0.001	2436	0.04637	0.944	0.7
exm1583504	22	18028946	rs146231898	A/G	CECR2	NS	10527	0.00364528	1.404	0.19	0.81	2737	0.01235	1.116	0.71	618	0	NA	NA	2820	0	>>	0.65	1916	0	>>	0.0011	2436	0.0005945	<<	0.39
exm2260021	12	25432626	rs7303282	A/G	KRAS	other/AIMS	10528	0.345328	1.027	0.47	0.83	2737	0.6149	0.956	0.52	619	0.3524	1.149	0.28	2820	0.3511	0.968	0.61	1916	0.1939	1.329	0.0011	2436	0.11	0.926	0.46
exm403593	4	70460328	rs4148304	T/C	UGT2A1	NS	10518	0.104404	1.046	0.37	0.94	2731	0.1176	0.855	0.15	617	0.05985	1.094	0.73	2820	0.0338	1.021	0.9	1914	0.1242	1.383	0.0011	2436	0.1674	0.98	0.8
exm436943	4	186111639	rs1133657	C/T	KIAA1430	NS	10527	0.485021	0.919	0.0075	0.85	2737	0.3194	0.912	0.2	619	0.562	0.881	0.29	2819	0.6238	0.92	0.18	1916	0.4985	0.792	0.0011	2436	0.5015	1.032	0.61
exm478811	5	134343662	rs139800400	A/G	CATSPER3	NS	10528	0.00576541	1.112	0.58	0.38	2737	0.003262	2.189	0.075	619	0.004963	1.097	0.92	2820	0	NA	NA	1916	0.002688	4.182	0.0011	2436	0.01843	0.614	0.065
exm539464	6	33653486	rs12528378	A/G	ITPR3	NS	10527	0.0377071	0.896	0.18	0.82	2737	0.02027	1.37	0.13	619	0.02481	1.041	0.92	2820	0.001491	1.624	0.43	1916	0.05684	0.556	0.0011	2435	0.09156	0.953	0.66
exm62242	1	55253419	rs113200987	T/C	TTC22	NS	10527	0.00589795	1.176	0.44	0.83	2736	0.01957	0.934	0.78	619	0.001241	<<	0.44	2820	0	NA	NA	1916	0.001152	6.307	0.0011	2436	0.0002973	<<	0.53
exm884484	11	6190850	rs77344022	T/C	OR52B2	NS	10527	0.0203473	0.71	0.0063	0.54	2736	0.03217	0.658	0.054	619	0.006203	3.027	0.057	2820	0.008449	0.731	0.38	1916	0.01728	0.239	0.0011	2436	0.02527	0.906	0.63
exm-rs3803662	16	52586341	rs3803662	T/C	LOC643714	other/GWAS	10528	0.43552	1.095	0.0036	0.035	2737	0.5009	0.918	0.2	619	0.4491	1.204	0.12	2820	0.5268	1.053	0.39	1916	0.374	1.258	0.0012	2436	0.2872	1.205	0.0048
exm-rs4775699	15	47873549	rs4775699	T/C	SEMA6D	other	10528	0.34175	1.044	0.19	0.59	2737	0.2584	0.953	0.53	619	0.2866	0.827	0.19	2820	0.293	1.117	0.084	1916	0.3556	1.264	0.0012	2436	0.5089	0.929	0.24
exm-rs6943555	7	69806023	rs6943555	A/T	AUTS2	other/GWAS	10497	0.338495	1.042	0.22	0.96	2709	0.5174	0.999	0.98	619	0.2246	1.107	0.49	2820	0.3019	0.933	0.28	1914	0.2529	1.29	0.0012	2435	0.2497	1.042	0.57
exm1270089	16	89294827	rs55974122	G/A	ZNF778	NS	10528	0.0842942	1.043	0.45	0.41	2737	0.01421	0.817	0.5	619	0.17	0.957	0.78	2820	0.1782	0.95	0.52	1916	0.08487	1.473	0.0012	2436	0.04043	0.997	0.99
exm338609	3	113326943	NA	T/C	SIDT1	NS	10528	0	>>	0.0016	0.75	2737	0	NA	NA	619	0	NA	NA	2820	0	NA	NA	1916	0	>>	0.0012	2436	0	NA	NA
exm34640	1	26670609	rs34370465	T/C	AIM1L	NS	10528	0.227104	1.064	0.09	0.96	2737	0.1615	1.09	0.33	619	0.1774	1.182	0.31	2820	0.2204	0.934	0.35	1916	0.2692	1.279	0.0012	2436	0.2982	0.988	0.86
exm608304	7	21621631	rs72655988	A/G	DNAH11	NS	10522	0.0253979	1.177	0.089	0.37	2737	0.04287	1.09	0.59	619	0.01241	0.802	0.72	2816	0.005229	1.416	0.33	1916	0.009985	2.324	0.0012	2434	0.04224	0.963	0.81
exm991616	12	28412372	rs11049488	A/G	CCDC91	NS	10528	0.135785	0.863	0.002	0.37	2737	0.07852	0.858	0.24	619	0.08065	1.265	0.31	2820	0.06039	0.868	0.28	1916	0.1609	0.718	0.0012	2436	0.2928	0.9	0.13
exm592931	6	161006084	rs76144756	A/G	LPA	NS	10528	0.00298211	1.046	0.87	0.51	2737	0.002097	0.818	0.8	619	0.001241	<<	0.55	2820	0.0002485	<<	0.26	1916	0.001152	6.565	0.0013	2436	0.009215	0.617	0.22
exm1255814	16	71570847	rs148657245	A/G	CHST4	NS	10528	0.00344599	1.529	0.051	0.54	2737	0.00233	0.708	0.66	619	0.001241	1.561	0.77	2820	0	NA	NA	1916	0.003072	3.814	0.0014	2436	0.00981	1.142	0.65
exm1458935	19	36592569	rs74518295	T/C	WDR62	NS	10528	0.00755467	1.263	0.2	0.017	2737	0.02586	1.091	0.66	619	0	NA	NA	2820	0	NA	NA	1916	0.000384	14.743	0.0014	2436	0.0005945	0.756	0.83
exm147155	1	212587320	rs4951595	C/T	TMEM206	NS	10528	0.0761431	1.127	0.032	0.32	2737	0.04404	1.005	0.98	619	0.08809	0.878	0.55	2820	0.1059	1.111	0.27	1916	0.1041	1.406	0.0014	2436	0.05707	0.999	0.99
exm1578090	21	46032087	rs111668637	A/G	KRTAP10-8	NS	10527	0.028562	1.029	0.79	0.76	2736	0.09529	0.937	0.57	619	0.003722	0.56	0.62	2820	0	NA	NA	1916	0.006144	2.861	0.0014	2436	0.0008918	1.158	0.88
exm2244819	7	107342392	NA	C/T	SLC26A4	other	10528	0.000331345	4.993	0.0013	0.4	2737	0	NA	NA	619	0	NA	NA	2820	0	NA	NA	1916	0.00192	5.037	0.0014	2436	0	NA	NA
exm314841	3	49462856	rs181568602	G/A	NICN1	NS	10524	0.000132556	7.185	0.0058	0.33	2733	0	NA	NA	619	0	NA	NA	2820	0	NA	NA	1916	0	>>	0.0014	2436	0.0005945	2.181	0.43
exm421147	4	119952955	rs61732241	T/C	SYNPO2	NS	10527	0.0428155	1.129	0.098	0.96	2737	0.02167	1.258	0.26	619	0.03102	0.488	0.11	2820	0.000994	0.388	0.41	1916	0.06644	1.506	0.0014	2435	0.1044	0.969	0.76
exm133490	1	196712596	rs35274867	T/A	CFH	NS	10528	0.0139828	1.054	0.69	0.18	2737	0.02516	0.972	0.89	619	0.007444	0.663	0.62	2820	0.0002485	<<	0.44	1916	0.006528	2.763	0.0015	2436	0.02348	0.792	0.28
exm1420128	19	8996460	rs115933306	C/A	MUC16	NS	10527	0.0289634	0.998	0.99	0.34	2736	0.09744	0.931	0.53	619	0.006203	0.334	0.3	2820	0	>>	0.84	1916	0.002688	4.086	0.0015	2436	0.002081	0.788	0.75
exm2258199	7	148716247	rs150428738	T/A	PDIA4	S	10528	0.00125911	2.121	0.018	0.5	2737	0	>>	0.005	619	0.001241	<<	0.5	2820	0	NA	NA	1916	0.000384	13.91	0.0015	2436	0.005054	1.282	0.52
exm459275	5	70308554	rs115486998	A/C	NAIP	NS	10526	0.00178974	1.456	0.23	0.49	2736	0.002098	0.353	0.3	619	0	>>	0.24	2820	0	NA	NA	1916	0.000768	8.508	0.0015	2435	0.004759	1.017	0.97
exm488613	5	140762533	rs36077896	A/C	PCDHGA7	NS	10519	0.00199045	1.501	0.18	0.76	2736	0.00373	0.439	0.26	617	0.001247	1.699	0.71	2820	0	NA	NA	1914	0.003077	3.786	0.0015	2432	0.00149	0.431	0.43
exm1035721	12	110009465	rs115802744	A/G	MMAB	NS	10528	0.00629556	1.121	0.59	0.75	2737	0.02213	0.994	0.98	619	0	NA	NA	2820	0	>>	0.65	1916	0	>>	0.0016	2436	0	NA	NA
exm1364064	17	78263486	rs17853989	C/T	RNF213	NS	10528	0.195427	1.09	0.037	0.26	2737	0.384	1.02	0.77	619	0.1476	0.842	0.33	2820	0.08101	1.168	0.14	1916	0.09524	1.412	0.0016	2436	0.1807	1.029	0.72
exm314790	3	49456758	rs116192290	T/C	AMT	NS	10527	0.00563362	0.602	0.035	0.079	2737	0.003029	1.649	0.31	619	0.001241	1.695	0.71	2820	0	NA	NA	1915	0.01307	0.181	0.0016	2436	0.011	0.714	0.32
exm575896	6	123687288	rs2873479	A/C	TRDN	NS	10526	0.0619035	1.082	0.21	0.55	2737	0.04893	1.281	0.085	618	0.1206	0.88	0.5	2820	0.06809	0.888	0.33	1916	0.02842	1.759	0.0016	2435	0.08294	1.051	0.66
exm768481	9	107267304	rs7030820	C/T	OR13F1	NS	10528	0.488072	0.991	0.77	0.25	2737	0.4567	1.166	0.018	619	0.4876	1.065	0.59	2820	0.6332	1.024	0.7	1916	0.4113	0.795	0.0016	2436	0.4141	0.967	0.6
exm770217	9	111653606	rs2230795	T/C	IKBKAP	NS	10528	0.0275017	1.065	0.57	0.4	2737	0.09343	1.022	0.85	619	0.002481	0.38	0.54	2820	0.0002485	<<	0.54	1916	0.001152	6.424	0.0016	2436	0.002378	0.322	0.19
exm1080898	13	113530199	rs11616795	A/G	ATP11A	NS	10525	0.0708035	1.043	0.47	0.53	2737	0.03332	1.047	0.8	619	0.05831	1.103	0.67	2819	0.04998	1.006	0.97	1915	0.098	1.406	0.0017	2435	0.1255	0.834	0.071
exm1086803	14	21929371	rs17106411	G/T	RAB2B	NS	10528	0.00497018	1.304	0.24	0.52	2737	0.01701	1.14	0.59	619	0	NA	NA	2820	0	NA	NA	1916	0	>>	0.0017	2436	0.0005945	<<	0.23
S1.6 Native Hawaiians
							Overall					African American				Native Hawaiian				Japanese American				Latino				European American
SNP	Chr	Position	SNP ID	A1/A2	Gene	Type	No. of samples	MAF	OR	P	P_Het	No. of samples	MAF	OR	P	No. of samples	MAF	OR	P	No. of samples	MAF	OR	P	No. of samples	MAF	OR	P	No. of samples	MAF	OR	P
exm403649	4	70505162	rs28404221	A/G	UGT2A2	NS	10528	0.0422797	1.171	0.031	0.97	2737	0.0459	1.408	0.015	619	0.02357	3.287	5.2e-05	2820	0.06337	0.937	0.59	1916	0.02304	1.302	0.23	2436	0.03181	0.928	0.68
exm697551	8	39862893	rs35212142	A/T	IDO2	NS	10516	0.0111509	1.526	0.00077	0.48	2737	0.01118	0.945	0.86	619	0.003722	9.094	9.6e-05	2808	0.00025	<<	0.33	1916	0.009601	1.605	0.12	2436	0.02705	1.488	0.019
exm2272254	15	61987998	rs2243431	T/C	VPS13C	other	10527	0.496951	1.005	0.88	0.96	2736	0.6275	0.892	0.086	619	0.5372	1.631	0.00012	2820	0.2992	0.916	0.19	1916	0.5757	1.064	0.38	2436	0.4964	1.039	0.54
exm2250944	12	42481732	rs7972986	A/G	GXYLT1	S	10497	0.191724	0.949	0.18	0.18	2733	0.1508	1.027	0.77	619	0.1985	1.735	0.00014	2800	0.1938	0.893	0.14	1914	0.255	0.828	0.023	2431	0.1908	0.887	0.14
exm764179	9	98638306	rs56108623	T/C	C9orf102	NS	10509	0.109636	1.041	0.41	0.62	2737	0.03774	0.993	0.97	611	0.1625	1.716	0.00017	2809	0.1535	0.995	0.95	1916	0.1586	1.089	0.37	2436	0.09869	0.796	0.044
exm139891	1	203455902	rs9439	C/A	PRELP	NS	10528	0.014049	0.953	0.72	0.48	2737	0.01002	0.746	0.43	619	0	>>	0.00019	2820	0.0002485	<<	0.31	1916	0.02227	0.861	0.55	2436	0.0327	0.934	0.7
exm419275	4	113352745	rs35519493	A/G	ALPK1	NS	10528	0.00404241	1.468	0.07	0.15	2737	0.002097	2.001	0.21	619	0	>>	0.00023	2820	0	NA	NA	1916	0.004608	0.861	0.78	2436	0.01189	1.172	0.56
exm433452	4	169343044	rs61740705	G/A	DDX60L	NS	10527	0.0809252	1.108	0.065	0.28	2737	0.0424	1.231	0.18	619	0.08065	2.111	0.00023	2820	0.009443	0.977	0.94	1916	0.1064	0.923	0.49	2435	0.196	1.071	0.37
exm2273442	8	2795835	rs583087	T/C	CSMD1	other	10525	0.102877	0.946	0.3	0.16	2735	0.1793	1.049	0.57	619	0.1117	0.408	0.00028	2820	0.05119	0.944	0.67	1916	0.06759	1.012	0.93	2435	0.0925	0.929	0.51
exm2261272	2	45995181	rs3924521	G/A	PRKCE	other/AIMS	10528	0.239629	1.036	0.47	0.42	2737	0.6461	1.006	0.93	619	0.08189	0.331	0.00034	2820	0.04747	1.374	0.013	1916	0.09985	1.004	0.97	2436	0.09691	1.121	0.27
exm771732	9	113259152	rs10817033	G/T	SVEP1	NS	10528	0.091385	1.118	0.047	0.45	2737	0.1834	1.089	0.31	619	0.05707	0.225	0.00041	2820	0.000994	0.744	0.74	1916	0.07143	1.243	0.092	2436	0.1058	1.206	0.058
exm129599	1	182922215	rs78487548	T/G	SHCBP1L	NS	10517	0.0827257	1.058	0.31	0.53	2733	0.01562	0.956	0.86	618	0.03722	2.494	0.00042	2819	0.1921	1.053	0.49	1912	0.07988	0.977	0.86	2435	0.05054	0.991	0.95
exm-rs349475	5	19440168	rs349475	A/G	CDH18	other/GWAS	10527	0.365142	1.05	0.13	0.52	2737	0.3679	1.055	0.42	619	0.2829	1.602	0.00043	2819	0.3606	1.009	0.88	1916	0.4332	0.943	0.42	2436	0.3341	1.09	0.19
exm2263101	23	55137978	rs4124595	G/A	PAGE2	other	6550	0.449117	1.041	0.26	0.022	1630	0.3426	0.994	0.94	452	0.2648	1.698	0.0005	1762	0.598	1.004	0.96	1139	0.4238	0.965	0.68	1567	0.4803	1.072	0.33
exm2269432	3	35536237	rs7650296	C/T	ARPP21	other	10528	0.462624	1.038	0.24	0.91	2737	0.6384	1.013	0.85	619	0.2357	1.627	0.00052	2820	0.3415	0.988	0.85	1916	0.4681	1.076	0.29	2436	0.4334	0.993	0.91
exm2271809	12	126940768	rs11058659	C/T	LOC100128554	other	10528	0.431014	1.022	0.49	0.92	2737	0.5431	0.982	0.78	619	0.2146	1.679	0.00052	2820	0.3313	0.972	0.66	1916	0.3763	0.965	0.63	2436	0.5015	1.074	0.26
exm783123	9	130475480	rs118012211	T/C	C9orf117	NS	10501	0.0158952	1.226	0.079	0.14	2736	0.0009324	0.901	0.93	619	0.01241	3.886	0.0006	2798	0.05503	1.174	0.2	1916	0	NA	NA	2432	0.001788	<<	0.1
exm395005	4	38930893	rs2306923	A/G	FAM114A1	NS	10528	0.0302187	1.058	0.54	0.34	2737	0.003728	0.98	0.97	619	0	>>	0.00061	2820	0.006958	1.117	0.75	1916	0.1502	1.051	0.61	2436	0.006243	0.718	0.48
exm2254420	2	100686486	rs7582731	C/T	AFF3	other	10528	0.450232	1.01	0.75	0.5	2737	0.6372	0.914	0.19	619	0.3251	1.541	0.00063	2820	0.2669	1.008	0.91	1916	0.4109	0.934	0.34	2436	0.4914	1.054	0.4
exm773653	9	116132334	rs3088235	T/C	BSPRY	NS	10528	0.125514	1.035	0.45	0.9	2737	0.05638	0.934	0.65	619	0.2196	1.601	0.00065	2820	0.1315	0.969	0.73	1916	0.1194	0.95	0.65	2436	0.1888	1.021	0.8
exm-rs3793917	10	124219275	rs3793917	C/G	HTRA1	other/GWAS	10480	0.27729	0.97	0.38	0.48	2728	0.2444	1.011	0.89	613	0.4142	0.648	0.00081	2797	0.3564	0.998	0.98	1906	0.256	0.882	0.13	2436	0.2087	1.142	0.08
exm2267637	14	27984523	rs8018341	G/A	LOC100505967	other	10527	0.461095	1.031	0.34	0.94	2737	0.4557	0.989	0.86	619	0.5819	0.652	0.00082	2819	0.6176	1.173	0.01	1916	0.3164	1.115	0.15	2436	0.3639	0.973	0.68
exm2268553	23	143036520	rs9306815	G/A	UBE2NL	other	6546	0.457515	0.948	0.15	0.67	1629	0.5472	1.06	0.44	452	0.5254	0.627	0.0009	1758	0.4412	0.975	0.72	1139	0.4752	0.886	0.16	1568	0.3311	0.948	0.49
exm803307	9	140277794	rs80074261	C/T	EXD3	NS	10521	0.114579	1.11	0.03	0.73	2733	0.1051	0.915	0.43	618	0.103	1.807	0.00093	2820	0.1926	1.232	0.0035	1914	0.06375	0.782	0.11	2436	0.07551	1.089	0.47
exm874344	11	1080391	rs41521547	A/G	MUC2	NS	10527	0.0477863	1.137	0.061	0.83	2736	0.04149	1.037	0.82	619	0.03102	2.57	0.00094	2820	0.0338	0.976	0.88	1916	0.05031	1.093	0.56	2436	0.07461	1.18	0.14
exm1510645	19	56424443	rs303997	T/C	NLRP13	NS	10528	0.346455	1.004	0.9	0.44	2737	0.291	0.992	0.91	619	0.3027	0.617	0.00095	2820	0.3109	0.974	0.68	1916	0.4501	1.066	0.37	2436	0.39	1.101	0.13
exm884180	11	5968728	rs1840178	T/C	OR56A3	NS	10519	0.440767	1.012	0.71	0.33	2737	0.4828	1.004	0.95	618	0.3821	1.518	0.00095	2813	0.4421	0.98	0.73	1915	0.3936	0.983	0.81	2436	0.4361	0.987	0.83
exm208594	2	86831051	rs61760874	A/C	RNF103	NS	10528	0.00245195	1.365	0.25	0.39	2737	0.001165	<<	0.27	619	0	>>	0.00097	2820	0	NA	NA	1916	0.00384	1.012	0.98	2436	0.00654	1.238	0.56
exm184324	2	31417290	rs76523220	C/T	CAPN14	NS	10528	0.038171	0.916	0.33	0.71	2737	0.09599	0.843	0.16	619	0.001241	16.285	0.001	2820	0.0002485	<<	0.33	1916	0.0265	0.834	0.43	2436	0.02765	1.032	0.86
exm782918	9	130286044	rs147101023	T/C	FAM129B	NS	10528	0.000463883	2.276	0.12	0.82	2737	0.000233	4.214	0.27	619	0	>>	0.001	2820	0.000994	<<	0.22	1916	0	NA	NA	2436	0.0005945	1.167	0.9
exm790420	9	134385436	rs2296949	A/G	POMT1	NS	10528	0.128231	1.089	0.071	0.18	2737	0.2283	1.108	0.18	619	0.04591	2.204	0.001	2820	0.08797	1.194	0.079	1916	0.1413	0.873	0.19	2436	0.05826	1.016	0.9
exm790437	9	134386781	rs4740164	A/G	POMT1	NS	10528	0.0626905	1.046	0.47	0.23	2737	0.01957	0.938	0.79	619	0.04094	2.28	0.001	2820	0.08449	1.115	0.3	1916	0.1183	0.884	0.27	2436	0.0538	1.023	0.87
exm1272749	16	90095690	rs75909132	T/C	C16orf3	NS	10527	0.0092789	0.997	0.98	0.88	2737	0	NA	NA	619	0.002481	8.815	0.0011	2819	0.03381	0.868	0.41	1916	0	NA	NA	2436	0.0005945	<<	0.32
exm1289612	17	7750936	rs73233606	G/A	KDM6B	NS	10527	0.0540093	1.074	0.34	0.8	2737	0.1447	1.176	0.072	619	0.006203	5.326	0.0011	2820	0	>>	0.65	1915	0.03226	0.7	0.1	2436	0.03121	0.845	0.38
exm1453016	19	33467413	rs2304103	T/C	C19orf40	NS	10528	0.0497681	1.019	0.78	0.79	2737	0.06594	0.771	0.074	619	0.02357	2.675	0.0011	2820	0.03926	1.012	0.94	1916	0.05568	1.102	0.51	2436	0.0434	0.989	0.94
exm1660728	23	142967468	rs237520	T/G	UBE2NL	ST	6549	0.373984	0.89	0.0016	0.26	1630	0.3436	0.9	0.17	452	0.4852	0.626	0.0011	1761	0.3736	0.956	0.52	1138	0.4295	0.842	0.049	1568	0.3452	0.921	0.29
exm493997	5	149001551	rs4629585	C/A	ARHGEF37	NS	10528	0.443472	0.978	0.48	0.6	2737	0.3854	1.015	0.83	619	0.4094	0.665	0.0011	2820	0.5475	1.046	0.46	1916	0.4766	0.996	0.95	2436	0.3757	0.966	0.6
exm-rs11200638	10	124220544	rs11200638	A/G	HTRA1	other/GWAS	10525	0.274397	0.989	0.74	0.5	2737	0.2384	1.03	0.7	619	0.4144	0.661	0.0012	2818	0.356	1.015	0.81	1916	0.2527	0.91	0.25	2435	0.2061	1.162	0.049
exm333137	3	98304403	rs11921054	A/G	CPOX	NS	10528	0.0421471	0.97	0.72	0.9	2737	0.1181	0.947	0.6	619	0.008685	4.258	0.0012	2820	0.001491	0.272	0.28	1916	0.02419	0.785	0.32	2436	0.01576	0.879	0.61
exm547627	6	42933526	NA	T/C	PEX6	SP	10528	0.108946	1.06	0.24	0.11	2737	0.06081	0.917	0.55	619	0.1861	1.646	0.0012	2820	0.1551	0.993	0.93	1916	0.1717	1.03	0.75	2436	0.04816	1.171	0.27
exm-rs204888	6	32089142	rs116299635	A/C	PRRT1	other/HLA	10528	0.120146	1.041	0.4	0.026	2737	0.1745	1.106	0.24	619	0.1005	0.442	0.0013	2820	0.1133	1.141	0.14	1916	0.1002	0.986	0.91	2436	0.07907	1.044	0.71
exm1660212	23	140993264	rs176036	A/G	MAGEC1	NS	6549	0.15335	1.1	0.051	1	1629	0.1503	1.159	0.14	452	0.197	1.696	0.0013	1762	0.07757	0.992	0.95	1138	0.2143	0.971	0.79	1568	0.1941	1.059	0.53
exm971010	11	130784589	rs117834100	A/C	SNX19	NS	10528	0.0171637	1.256	0.041	0.83	2737	0	NA	NA	619	0.002481	8.815	0.0013	2820	0.06312	1.211	0.1	1916	0	>>	0.42	2436	0.0008918	<<	0.22
exm-rs7395662	11	48518893	rs7395662	A/G	OR4A47	other/GWAS	10528	0.467263	0.977	0.46	0.22	2737	0.5478	0.965	0.59	619	0.6985	0.626	0.0014	2820	0.4734	1.005	0.94	1916	0.3564	1.029	0.7	2436	0.3876	0.998	0.97
exm-rs7716600	5	44875005	rs7716600	A/C	MRPS30	other/GWAS	10527	0.299377	1.147	6.3e-05	0.28	2737	0.1841	1.132	0.14	619	0.4603	1.487	0.0014	2820	0.4744	1.035	0.57	1915	0.2613	1.167	0.048	2436	0.228	1.191	0.015
exm2273384	3	196673831	rs56890907	G/A	PIGZ	other	10528	0.0810471	1.061	0.35	0.99	2737	0.2171	0.941	0.46	619	0.02854	2.546	0.0014	2820	0.02684	1.317	0.1	1916	0.02765	1.041	0.85	2436	0.02616	1.07	0.72
exm441836	5	1225626	rs7728667	T/A	SLC6A18	NS	10528	0.249569	1.1	0.0066	0.058	2737	0.1873	1.083	0.34	619	0.2407	1.535	0.0014	2820	0.3559	1.058	0.37	1916	0.2231	1.12	0.16	2436	0.2244	1.034	0.65
exm874510	11	1088835	rs41389046	T/C	MUC2	NS	10528	0.0565938	1.094	0.17	0.25	2737	0.06407	1.019	0.89	619	0.03722	2.388	0.0014	2820	0.03429	0.856	0.37	1916	0.0553	1.029	0.85	2436	0.07937	1.175	0.15
exm-rs1561570	10	13155726	rs1561570	C/T	OPTN	other/GWAS	10526	0.424964	1.037	0.25	0.16	2735	0.3125	0.941	0.4	619	0.4516	1.504	0.0015	2820	0.4384	0.988	0.84	1916	0.5092	1.05	0.5	2436	0.4807	1.055	0.4
exm1094677	14	25102160	rs8192917	C/T	GZMB	NS	10526	0.279759	0.934	0.055	0.58	2737	0.4124	1.077	0.27	618	0.4069	0.671	0.0015	2819	0.2054	0.83	0.014	1916	0.1816	1.048	0.62	2436	0.2449	0.908	0.19
exm169870	2	1520676	rs1126799	T/C	TPO	NS	10511	0.356773	0.969	0.34	0.73	2731	0.2359	1.003	0.97	619	0.4715	0.672	0.0015	2813	0.3436	1.02	0.75	1914	0.3905	1.028	0.71	2434	0.4729	0.932	0.26
exm196196	2	61275771	rs74350038	G/C	PEX13	NS	10528	0.0138502	1.247	0.065	0.69	2737	0.008854	1.424	0.24	619	0.003722	6.294	0.0015	2820	0	>>	0.23	1916	0.01613	1.128	0.65	2436	0.03746	1.086	0.61
exm2249562	11	111156719	rs61753531	C/T	C11orf53	S	10528	0.00795229	1.352	0.051	0.63	2737	0.007456	0.743	0.48	619	0.003722	7.196	0.0015	2820	0.0002485	1.418	0.81	1916	0.006144	1.915	0.067	2436	0.02021	1.186	0.42
exm2267144	11	3743046	rs2957866	A/G	NUP98	other	10527	0.452214	1.064	0.052	0.17	2737	0.5384	1.081	0.24	618	0.5336	1.519	0.0015	2820	0.41	0.925	0.21	1916	0.3122	1.026	0.73	2436	0.4816	1.151	0.026
exm766424	9	101533220	rs6415847	C/T	ANKS6	NS	10528	0.121405	0.987	0.79	0.79	2737	0.0424	1.053	0.75	619	0.09926	0.44	0.0015	2820	0.2582	0.998	0.97	1916	0.1478	1.106	0.31	2436	0.0434	0.909	0.55
exm874443	11	1084362	rs11245936	A/G	MUC2	NS	10528	0.0483101	1.116	0.11	0.84	2737	0.04287	0.943	0.73	619	0.03226	2.462	0.0015	2820	0.0338	0.975	0.88	1916	0.04954	1.093	0.57	2436	0.07551	1.178	0.14
exm874542	11	1092388	rs111520984	C/A	MUC2	NS	10526	0.0537513	1.03	0.66	0.63	2737	0.06384	0.866	0.31	619	0.03226	2.487	0.0015	2818	0.03779	0.879	0.43	1916	0.04301	1.001	0.99	2436	0.07342	1.127	0.3
exm-rs2429582	7	122202593	rs2429582	C/T	CADPS2	other/GWAS	10519	0.303924	0.999	0.98	0.88	2730	0.1872	1.059	0.5	617	0.3856	1.484	0.0016	2820	0.3735	0.915	0.15	1916	0.2873	0.942	0.45	2436	0.363	0.997	0.97
exm1477237	19	44570393	rs6509138	A/C	ZNF223	NS	10527	0.401445	0.98	0.54	0.6	2737	0.2556	0.949	0.51	619	0.5695	0.675	0.0016	2820	0.3288	0.976	0.7	1915	0.4081	1.088	0.24	2436	0.629	1.029	0.66
exm-rs13074924	3	174029045	rs13074924	A/G	NLGN1	other/GWAS	10528	0.280848	1.062	0.09	0.52	2737	0.4143	0.998	0.98	619	0.1489	1.634	0.0017	2820	0.1166	1.172	0.077	1916	0.2619	1.114	0.16	2436	0.3534	0.968	0.62
exm-rs169494	6	32097876	rs115173086	T/C	PRRT1	HLA	10525	0.105727	1.037	0.46	0.038	2734	0.1285	1.042	0.67	619	0.09677	0.447	0.0017	2820	0.1131	1.144	0.14	1916	0.09524	1.053	0.66	2436	0.07818	1.059	0.62
exm-rs4924935	17	18753870	rs4924935	C/T	PRPSAP2	other/GWAS	10528	0.237442	1.009	0.81	0.35	2737	0.2081	1.129	0.13	619	0.17	0.549	0.0017	2820	0.2368	1.087	0.23	1916	0.2158	0.985	0.86	2436	0.3086	0.968	0.63
exm1434159	19	14083761	rs2305780	T/C	RFX1	NS	10514	0.469645	1.007	0.83	0.44	2727	0.2964	1.137	0.077	618	0.3275	1.531	0.0017	2819	0.6146	0.995	0.94	1914	0.4969	0.986	0.84	2436	0.5303	0.878	0.04
exm2270137	5	136816816	rs1919519	T/C	SPOCK1	other	10528	0.497681	0.988	0.71	0.59	2737	0.5815	1.08	0.26	619	0.4963	0.686	0.0017	2820	0.5624	0.954	0.43	1916	0.3752	1.028	0.71	2436	0.4084	1.016	0.81
exm985879	12	12814818	rs4763862	C/T	GPR19	NS	10527	0.0995361	0.958	0.46	0.89	2737	0.2428	0.949	0.5	619	0.03846	0.195	0.0017	2819	0.007952	1.199	0.56	1916	0.06221	1.24	0.11	2436	0.06986	0.836	0.17
exm-rs3129878	6	32408735	rs114598145	C/A	C6orf10	other/HLA	10527	0.341729	0.916	0.0083	0.81	2737	0.2544	1.023	0.76	618	0.3197	0.658	0.0018	2820	0.4948	0.883	0.037	1916	0.2815	0.955	0.57	2436	0.3219	0.934	0.3
exm1094673	14	25101589	rs11539752	C/G	GZMB	NS	10524	0.263626	0.92	0.022	0.42	2736	0.3571	1.025	0.72	618	0.4055	0.675	0.0018	2818	0.205	0.832	0.016	1916	0.1778	1.054	0.57	2436	0.247	0.909	0.19
exm1252907	16	69458591	rs117949766	T/C	CYB5B	NS	10528	0.00901259	1.358	0.034	0.73	2737	0.000932	<<	0.31	619	0.009926	3.87	0.0018	2820	0.02957	1.215	0.23	1916	0.000384	2.6	0.44	2436	0.001189	0.672	0.73
exm167043	1	248059423	rs10888267	T/C	OR2W3	NS	10494	0.415003	0.966	0.29	0.96	2725	0.2512	0.898	0.18	618	0.6228	0.677	0.0018	2810	0.4723	1.038	0.53	1911	0.3978	0.977	0.75	2430	0.5185	1.024	0.71
exm2249267	10	50533776	rs10857471	G/C	C10orf71	S	10523	0.327742	1.064	0.061	0.14	2737	0.2985	1.077	0.3	619	0.304	1.499	0.0018	2818	0.2134	1.038	0.61	1916	0.404	1.013	0.86	2433	0.4485	1.039	0.55
exm2270318	6	43396325	rs1214752	T/C	ABCC10	other	10528	0.500464	0.956	0.16	0.61	2737	0.4047	0.954	0.49	619	0.5881	0.682	0.0018	2820	0.6315	0.879	0.034	1916	0.4474	1.036	0.61	2436	0.486	1.066	0.31
exm272080	2	228131169	rs11677877	G/A	COL4A3	NS	10528	0.100596	1.026	0.61	0.31	2737	0.07363	1.05	0.69	619	0.1377	1.662	0.0018	2820	0.1006	1.098	0.33	1916	0.1563	0.793	0.026	2436	0.08294	0.966	0.77
exm500435	5	159686503	rs13362036	A/G	CCNJL	NS	10528	0.0700464	0.955	0.46	0.81	2737	0.07922	0.941	0.62	619	0.07692	0.389	0.0018	2820	0.1143	1.102	0.28	1916	0.02765	0.849	0.46	2436	0.03656	0.832	0.3
exm-rs10838956	11	48581765	rs10838956	T/C	OR4A47	other	10524	0.467179	0.977	0.47	0.23	2736	0.548	0.964	0.58	619	0.6985	0.633	0.0019	2817	0.4731	1.005	0.93	1916	0.356	1.027	0.72	2436	0.3876	0.998	0.97
exm-rs1106766	12	57809456	rs1106766	T/C	INHBC	other/GWAS	10528	0.166733	1.043	0.32	0.99	2737	0.1158	0.941	0.56	619	0.06576	2.05	0.0019	2820	0.07704	0.841	0.15	1916	0.3483	1.07	0.37	2436	0.2227	1.102	0.19
exm-rs2154294	14	42655275	rs2154294	T/C	LRFN5	other/GWAS	10525	0.384315	1.048	0.15	0.046	2737	0.4501	0.983	0.8	619	0.3313	1.474	0.0019	2817	0.1889	1.082	0.29	1916	0.4727	1.074	0.31	2436	0.478	0.987	0.83
exm2265063	1	182854200	rs4275414	A/G	DHX9	other/AIMS	10528	0.260835	1.031	0.43	0.69	2737	0.5198	0.964	0.59	619	0.05831	1.993	0.002	2820	0.206	1.041	0.58	1916	0.1886	0.928	0.42	2436	0.1005	1.174	0.11
exm260434	2	208773279	NA	C/G	PLEKHM3	NS	10528	0.000132538	9.884	0.00031	0.88	2737	0	NA	NA	619	0	>>	0.002	2820	0.0002485	9.508	0.013	1916	0.000384	<<	0.14	2436	0	NA	NA
exm-rs769051	6	33473894	rs769051	T/G	ZBTB9	other/HLA	10528	0.357256	1.003	0.94	0.86	2737	0.6309	1.046	0.52	619	0.237	0.609	0.0021	2820	0.0917	1.117	0.27	1916	0.3675	1.023	0.76	2436	0.3466	1.005	0.94
exm336614	3	111298010	rs143049331	A/G	CD96	NS	10528	0.000662691	3.028	0.0054	0.15	2737	0	NA	NA	619	0.008685	3.925	0.0021	2820	0.000497	0.932	0.95	1916	0	NA	NA	2436	0.0002973	<<	0.49
exm618970	7	45125700	rs141784618	T/C	NACAD	NS	10528	0.00576541	1.211	0.31	0.2	2737	0.005825	0.56	0.28	619	0.001241	14.331	0.0021	2820	0	>>	0.15	1916	0.008449	1.178	0.65	2436	0.01159	1.173	0.57
exm-rs3810936	9	117552885	rs3810936	T/C	TNFSF15	other/GWAS	10528	0.270577	1.073	0.041	0.66	2737	0.1272	1.085	0.39	619	0.371	1.491	0.0022	2820	0.376	1.112	0.08	1916	0.2634	0.994	0.94	2436	0.3089	0.978	0.74
exm126249	1	177911130	rs139593986	T/C	SEC16B	NS	10528	0.00523526	0.965	0.87	0.74	2737	0.000233	<<	0.62	619	0.001241	13.316	0.0022	2820	0.01914	0.814	0.39	1916	0	NA	NA	2436	0	NA	NA
exm428887	4	153690842	rs4696354	T/C	TIGD4	NS	10525	0.315458	0.958	0.2	0.45	2736	0.3204	1.027	0.7	619	0.4628	0.687	0.0022	2819	0.2514	0.914	0.2	1916	0.2692	1.023	0.77	2435	0.3864	0.984	0.8
exm550224	6	43488144	rs79222964	G/A	POLR1C	NS	10528	0.0299536	0.934	0.46	0.57	2737	0.000466	<<	0.45	619	0.08065	0.417	0.0022	2820	0.09269	1.03	0.77	1916	0.002304	2.15	0.2	2436	0.001784	0.499	0.53
exm67802	1	70501827	rs144654091	G/T	LRRC7	NS	10528	0.000662691	1.699	0.26	0.91	2737	0.000699	<<	0.28	619	0	>>	0.0022	2820	0	NA	NA	1916	0.000384	2.407	0.52	2436	0.001784	1.087	0.91
exm-rs1122608	19	11163601	rs1122608	T/G	SMARCA4	other/GWAS	10528	0.139761	1.092	0.043	0.12	2737	0.07269	1.126	0.35	619	0.1042	1.747	0.0023	2820	0.1297	1.033	0.72	1916	0.1509	1.103	0.3	2436	0.2372	1.042	0.57
exm438912	4	187629770	rs3733414	C/A	FAT1	NS	10526	0.411773	1.01	0.77	0.65	2737	0.3141	1.017	0.82	618	0.5012	0.679	0.0023	2820	0.2237	1.049	0.5	1916	0.5492	1.062	0.4	2435	0.6338	1.038	0.57
exm444838	5	13717471	rs2277046	C/T	DNAH5	NS	10528	0.200729	0.973	0.51	0.83	2737	0.02749	1	1	619	0.2097	0.597	0.0023	2820	0.4384	1.02	0.74	1916	0.2542	1.006	0.94	2436	0.09394	0.944	0.6
exm801217	9	139925983	rs117125309	A/G	FUT7	NS	10477	0.0176463	0.997	0.98	0.34	2704	0.003501	0.786	0.7	610	0.03865	2.202	0.0023	2818	0.03729	0.756	0.11	1911	0.01153	1.083	0.8	2434	0.01189	0.841	0.57
exm2255141	22	36537725	rs61731692	A/G	APOL3	S	10528	0.0774685	1.073	0.23	0.014	2737	0.08434	1.178	0.15	619	0.05707	2.021	0.0024	2820	0.003728	1.473	0.34	1916	0.09332	1.003	0.98	2436	0.1495	0.952	0.58
exm-rs13281615	8	128355618	rs13281615	A/G	POU5F1B	other/GWAS	10458	0.489529	0.958	0.17	0.39	2711	0.5704	0.921	0.22	610	0.6253	0.675	0.0025	2806	0.3859	0.963	0.53	1906	0.3813	0.927	0.28	2425	0.5615	1.086	0.19
exm1148014	15	40265799	rs2307105	A/G	EIF2AK4	NS	10528	0.15116	0.986	0.76	0.52	2737	0.09669	0.957	0.7	619	0.06079	1.927	0.0025	2820	0.2371	0.891	0.11	1916	0.2742	1.019	0.81	2436	0.04429	1.099	0.53
exm1569817	21	38444881	rs73200245	A/G	PIGP	NS	10528	0.209808	0.976	0.54	0.93	2737	0.3404	0.946	0.44	619	0.1203	0.504	0.0025	2820	0.0743	1.143	0.22	1916	0.2803	1.019	0.81	2436	0.1721	0.98	0.81
exm2271286	10	49810977	rs7915707	G/T	ARHGAP22	other	10526	0.488799	1.062	0.062	0.28	2737	0.6291	1.057	0.43	619	0.4988	1.467	0.0025	2818	0.322	0.957	0.5	1916	0.4316	1.176	0.023	2436	0.5511	0.998	0.97
exm256473	2	201736166	rs7562391	C/A	PPIL3	NS	10528	0.15328	0.924	0.12	0.55	2737	0.3588	0.973	0.7	619	0.07196	0.378	0.0025	2820	0.001243	0.929	0.93	1916	0.09716	1.039	0.74	2436	0.1359	0.85	0.092
exm358105	3	149485531	rs3821406	C/A	ANKUB1	NS	10522	0.0458223	1.008	0.91	0.2	2735	0.04522	1.066	0.68	618	0.05348	0.327	0.0025	2817	0.09905	1.046	0.65	1916	0.0192	1.056	0.83	2436	0.001784	2.742	0.11
exm-rs3129853	6	32398648	rs114952662	A/G	C6orf10	other/HLA	10527	0.210764	0.946	0.15	0.95	2737	0.1526	1.043	0.65	619	0.2196	0.618	0.0026	2820	0.2015	0.969	0.67	1915	0.2202	0.951	0.56	2436	0.2866	0.951	0.47
exm-rs3129858	6	32400520	rs114010757	A/G	C6orf10	other/HLA	10528	0.211531	0.944	0.13	0.96	2737	0.1526	1.043	0.65	619	0.2196	0.618	0.0026	2820	0.2045	0.956	0.54	1916	0.22	0.951	0.56	2436	0.2866	0.954	0.5
exm-rs6017291	20	42854134	rs6017291	G/A	LOC100505783	other/GWAS	10526	0.20228	1.006	0.88	0.62	2737	0.1519	1.035	0.71	619	0.1489	0.539	0.0026	2819	0.3424	1.076	0.24	1915	0.2606	0.993	0.93	2436	0.06659	0.995	0.97
A1/A2: minor allele/major allele
MAF: minor allele frequency in controls
P_Het: p-value from case-only testing (ER+ vs ER-)
NS: non-synonymous; S: synonymous; SP: splice site
Adjusted for age and the first 10 eigenvectors
