# Supplementary material for: Genome-Wide Testing of Putative Functional Exonic Variants in Relationship with Breast and Prostate Cancer Risk in a Multiethnic Population
Source: PLoS Genet. 2013 Mar 28;9(3):e1003419. doi: 10.1371/journal.pgen.1003419 (PMC3610631; doi:10.1371/journal.pgen.1003419)
Supplement: Table S2 — One hundred most significant associations between single SNPs and (S2.1) ER-positive Breast cancer and (S2.2) ER-negative breast cancer. (XLSX) [file pgen.1003419.s004.xlsx]

## Sheet: Sheet1
Supplemental Table S2: One Hundred Most Significant Associations between Single SNPs and (S2.1) ER-positive Breast Cancer and (S2.2) ER-negative Breast Cancer
S2.1 ER+ vs Control
														Overall		ER+		ER-
SNP	Chr	Position	SNP ID	A1/A2	Gene	Type	No. of samples	MAF	AA_MAF	NH_MAF	JA_MAF	LA_MAF	EA_MAF	OR	P	OR	P	OR	P	P_Het
exm-rs4784227	16	52599188	rs4784227	T/C	TOX3	other/GWAS	9226	0.206261	0.08038	0.3186	0.2266	0.2938	0.2482	1.268	6e-11	1.299	3.9e-09	1.092	0.3	0.049
exm1573155	21	43529776	NA	A/G	UMODL1	NS	9233	0.000596422	0.002097	0	0	0	0	4.994	5.6e-05	7.281	9.8e-07	1.527	0.69	0.18
exm85453	1	114380886	rs138092829	C/T	PTPN22	NS	9233	0.000265076	0.000932	0	0	0	0	6.143	0.0016	12.123	1.6e-06	<<	0.66	0.17
exm1358833	17	74625633	rs115756441	T/C	ST6GALNAC1	NS	9233	0.00311465	0.01002	0	0	0.001152	0.0002973	2.064	0.0025	3.262	2.4e-06	0.354	0.28	0.0056
exm1159729	15	48734008	rs113577372	A/C	FBN1	NS	9233	0.000530152	0.001864	0	0	0	0	4.762	0.00034	7.658	2.7e-06	<<	0.45	0.058
exm1093791	14	24792132	rs74387312	G/A	ADCY4	NS	9233	0.000198807	0.000233	0	0	0	0.0005945	8.838	9.9e-05	13.004	2.9e-06	15.219	0.00017	0.78
exm1621500	22	50682785	rs139896192	T/C	TUBGCP6	NS	9233	0.000331345	0.001165	0	0	0	0	7.2	5.1e-05	10.155	3.7e-06	3.503	0.23	0.42
exm900686	11	36119939	rs147309219	G/A	LDLRAD3	NS	9233	0.000265076	0.000932	0	0	0	0	7.253	0.00019	11.102	3.8e-06	10.067	0.0019	0.8
exm551694	6	44274257	rs139372744	A/G	AARS2	NS	9233	0.00125911	0.004427	0	0	0	0	3.195	0.00032	4.709	4.2e-06	1.925	0.38	0.16
exm178049	2	26418053	rs137852769	G/C	HADHA	NS	9233	0.000198807	0.000466	0	0	0.000384	0	7.423	0.00044	11.732	5.2e-06	<<	0.6	0.12
exm412038	4	88534411	NA	A/G	DSPP	NS	9233	0.000331345	0.001165	0	0	0	0	7.095	5.4e-05	9.391	9.3e-06	3.188	0.28	0.42
exm1530816	20	25457055	rs146288604	A/G	NINL	NS	9210	0.413003	0.476	0.2073	0.09542	0.6491	0.578	1.15	8.1e-05	1.217	9.5e-06	1.14	0.093	0.32
exm251838	2	188332602	rs113727256	C/T	TFPI	NS	9233	0.000331345	0.001165	0	0	0	0	6.34	0.00023	9.175	1.1e-05	<<	0.62	0.11
exm365260	3	172835082	rs16846616	T/C	SPATA16	NS	9232	0.166225	0.0438	0.2159	0.3218	0.163	0.1269	0.9	0.015	0.784	1.1e-05	1.057	0.58	0.011
exm58781	1	52344157	rs138608728	A/G	NRD1	NS	9233	0.0045063	0.01584	0	0	0	0	1.937	0.0016	2.762	1.2e-05	1.327	0.55	0.087
exm327643	3	63645410	rs73111385	G/A	SNTN	NS	9233	0.0119947	0.006757	0.01117	0	0.01421	0.03151	1.472	0.0015	1.797	1.6e-05	1.21	0.51	0.11
exm845189	10	98095688	rs147702836	A/G	DNTT	NS	9229	0.000198913	0	0	0.000747	0	0	8.015	0.00024	11.041	1.7e-05	15.389	0.0017	0.89
exm2008744	22	36876729	rs146269725	C/T	TXN2	NS	9232	0.00125928	0	0	0.004724	0	0	3.053	0.00024	3.949	2e-05	4.02	0.02	0.89
exm1363058	17	78055521	NA	G/A	CCDC40	NS	9233	0.00159046	0.005359	0	0	0.000384	0	2.538	0.0035	4.048	2.3e-05	0.747	0.78	0.086
exm410229	4	84227441	rs150258114	T/C	HPSE	NS	9233	0.000397614	0.001398	0	0	0	0	5.033	0.0011	7.802	2.3e-05	<<	0.6	0.12
exm2253588	1	89726438	rs148301962	A/G	GBP5	S	9233	0.000198807	0	0.001241	0	0.000384	0.0002973	6.742	0.0014	10.963	2.9e-05	<<	0.67	0.11
exm2002775	22	24567910	rs146769197	T/C	CABIN1	NS	9233	0.00298211	0.000233	0.004963	0.00994	0	0	1.747	0.015	2.651	3.1e-05	<<	0.17	0.025
exm365274	3	172835290	rs1515441	T/C	SPATA16	NS	9232	0.187964	0.09856	0.2543	0.3217	0.1751	0.1361	0.913	0.027	0.804	3.3e-05	1.086	0.37	0.005
exm1478796	19	45206624	rs114907619	C/T	CEACAM16	NS	9233	0.00178926	0.006291	0	0	0	0	2.708	0.00058	3.715	3.4e-05	1.908	0.29	0.26
exm365036	3	172232682	rs143353036	G/A	TNFSF10	NS	9233	0.000331345	0.001165	0	0	0	0	6.902	8e-05	8.485	3.4e-05	7.156	0.0079	0.67
exm475558	5	128302185	rs142676290	A/G	SLC27A6	NS	9233	0.000397614	0.000932	0	0	0.000768	0	5.16	0.0007	7.548	3.7e-05	2.675	0.35	0.4
exm817018	10	28438930	rs147999424	A/G	MPP7	NS	9233	0.000198807	0.000233	0	0	0	0.0005945	5.978	0.0032	10.108	3.8e-05	<<	0.65	0.19
exm1828305	15	39881431	NA	G/A	THBS1	NS	9232	0.00139183	0	0.003722	0.004227	0.000384	0	2.486	0.0012	3.296	3.9e-05	<<	0.32	0.11
exm673151	7	151073747	NA	A/G	NUB1	NS	9230	0.000331477	0.001167	0	0	0	0	5.072	0.0026	8.619	3.9e-05	<<	0.65	0.18
exm1507449	19	55591614	NA	A/G	EPS8L1	NS	9225	0.000663394	0.002331	0	0	0	0	4.089	0.00059	5.754	4.4e-05	3.499	0.095	0.57
exm518967	6	18139201	rs112339338	A/G	TPMT	NS	9233	0.000463883	0.001631	0	0	0	0	4.265	0.0028	6.868	5.1e-05	2.658	0.35	0.35
exm601387	7	4259879	rs149005994	G/A	SDK1	NS	9233	0.000265076	0.000233	0	0.000497	0	0.0002973	7.115	0.00014	8.639	5.2e-05	<<	0.67	0.15
exm1181355	15	79277486	rs116883402	T/C	RASGRF1	NS	9233	0.000198807	0	0	0	0.000384	0.0005945	5.805	0.0048	10.197	5.6e-05	<<	0.65	0.16
exm953079	11	107427713	rs116578571	C/T	ALKBH8	NS	9233	0.00291584	0.01002	0.001241	0	0	0	2.357	0.00027	2.885	7e-05	2.399	0.047	0.6
exm542320	6	36297893	rs41272160	T/C	C6orf222	NS	9233	0.00125911	0.003495	0	0.0002485	0	0.0008918	2.12	0.036	3.935	7.1e-05	<<	0.28	0.036
exm2219912	12	112691962	NA	G/A	C12orf51	other	9233	0.000198807	0	0	0	0.001152	0	5.272	0.0079	9.757	7.5e-05	<<	0.62	0.12
exm147660	1	213186688	rs74825882	G/C	ANGEL2	NS	9233	0.0047051	0.01584	0	0	0.001152	0	1.811	0.0048	2.536	7.6e-05	0.918	0.87	0.067
exm1161226	15	50904954	rs150072757	C/T	TRPM7	NS	9232	0.000331389	0.001165	0	0	0	0	6.954	5.1e-05	7.957	7.8e-05	6.372	0.012	0.93
exm1079906	13	111294796	rs146355429	T/C	CARS2	NS	9233	0.00284957	0.009553	0.001241	0	0.000384	0	1.962	0.0096	2.994	7.9e-05	1.597	0.38	0.21
exm1202723	16	1634241	rs139619013	C/T	IFT140	NS	9233	0.000662691	0.000466	0.001241	0	0.00192	0.0005945	3.186	0.0037	4.794	8.6e-05	1.27	0.82	0.28
exm701423	8	55538687	rs147990983	T/C	RP1	NS	9231	0.000729153	0.001631	0	0	0.001538	0	3.2	0.0051	5.172	8.6e-05	1.083	0.94	0.12
exm2255054	22	26706747	rs144295883	T/C	SEZ6L	S	9233	0.000397614	0.001398	0	0	0	0	4.381	0.0042	7.148	9.5e-05	2.513	0.39	0.47
exm1229636	16	28508506	NA	T/C	APOBR	NS	9233	0.000530152	0.001864	0	0	0	0	3.589	0.0071	6.105	0.0001	1.829	0.57	0.37
exm1594737	22	24982125	NA	T/C	C22orf36	NS	9231	0.000265076	0.000233	0	0	0.000768	0.0002973	5.101	0.0035	8.143	0.0001	3.711	0.21	0.43
exm533277	6	31918154	rs149101394	G/A	CFB	NS	9233	0.00258449	0.007456	0.001241	0.0002485	0.000768	0.0008918	2.9	3.5e-06	2.917	0.0001	3.875	0.00017	0.56
exm537291	6	32948385	rs144861747	A/G	BRD2	NS	9233	0.00165673	0.003728	0	0	0.001152	0.001784	2.927	0.00012	3.438	0.0001	1.397	0.65	0.28
exm825826	10	55721531	rs139087859	C/T	PCDH15	NS	9232	0.000662778	0.002331	0	0	0	0	3.101	0.011	5.424	0.0001	<<	0.33	0.06
exm-rs1219648	10	123346190	rs1219648	G/A	FGFR2	other/GWAS	9232	0.379971	0.4194	0.2767	0.3476	0.394	0.3823	1.135	5.9e-05	1.163	0.00011	1.093	0.21	0.55
exm1161772	15	51763587	rs140921435	A/G	DMXL2	NS	9233	0.00112657	0.003728	0	0	0.000384	0	2.86	0.0033	4.239	0.00012	0.967	0.97	0.25
exm875421	11	1251368	NA	A/T	MUC5B	NS	9233	0.000662691	0.002097	0	0	0.000384	0	3.111	0.011	5.353	0.00012	<<	0.44	0.081
exm-rs2981575	10	123346116	rs2981575	C/T	FGFR2	other/GWAS	9230	0.432511	0.565	0.2891	0.3734	0.4085	0.387	1.149	1e-05	1.161	0.00013	1.144	0.058	0.97
exm1627012	23	7268296	rs151332463	G/C	STS	NS	5256	0.00182175	0.006256	0	0	0	0	2.329	0.021	4.015	0.00013	<<	0.21	0.0098
exm445415	5	13901641	rs35090077	C/A	DNAH5	NS	9233	0.0298211	0.09739	0.004963	0.0002485	0.00768	0.002081	0.644	0.00027	0.521	0.00013	0.634	0.059	0.53
exm1392934	18	72344002	rs115368653	A/G	ZNF407	NS	9233	0.00477137	0.01608	0	0	0.001152	0	1.825	0.0024	2.353	0.00014	1.243	0.61	0.13
exm1513900	19	58049931	rs144559367	G/A	ZNF549	NS	9233	0.000596422	0.001864	0	0	0.000384	0	4.089	0.00091	5.529	0.00014	3.652	0.085	0.59
exm45185	1	36786521	NA	G/A	SH3D21	NS	9229	0.000729056	0.002563	0	0	0	0	4.18	0.00026	5.133	0.00014	<<	0.47	0.073
exm-rs2981579	10	123337335	rs2981579	T/C	FGFR2	other/GWAS	9233	0.458714	0.5892	0.3015	0.4284	0.4078	0.4055	1.151	7.2e-06	1.159	0.00015	1.203	0.0091	0.56
exm1164047	15	56032665	rs185716584	G/C	PRTG	NS	9233	0.00185553	0.001631	0.002481	0	0.002688	0.003567	2.498	0.00055	3.026	0.00015	2.932	0.025	0.91
exm817900	10	30336672	rs72810797	T/C	KIAA1462	NS	9233	0.0116634	0.008155	0.006203	0.0002485	0.01575	0.02794	1.376	0.012	1.72	0.00015	1.032	0.92	0.15
exm833391	10	74100811	rs11552373	T/C	DNAJB12	NS	9233	0.00152419	0.000466	0	0	0.003072	0.003864	2.475	0.0018	3.236	0.00015	2.134	0.22	0.74
exm1223310	16	20681229	rs61745764	A/T	ACSM1	NS	9233	0.0315441	0.1051	0	0	0.008065	0.001189	1.442	0.0001	1.56	0.00017	1.38	0.078	0.71
exm1399115	19	1058176	rs4147918	G/A	ABCA7	NS	9216	0.0511884	0.009786	0.08561	0.1271	0.01421	0.03421	1.217	0.0031	1.345	0.00017	1.018	0.92	0.15
exm2102808	5	65350441	NA	G/A	ERBB2IP	NS	9233	0.00145792	0	0	0.005467	0	0	2.718	0.00059	3.285	0.00017	3.53	0.034	0.81
exm1260600	16	77822722	rs61737715	T/C	VAT1L	NS	9233	0.00324718	0.01095	0	0	0.000384	0.0002973	1.873	0.0098	2.692	0.00019	0.925	0.9	0.11
exm1292263	17	8383838	rs111570631	A/G	MYH10	NS	9233	0.00072896	0.00233	0	0	0	0.0002973	2.91	0.014	4.954	0.00019	<<	0.42	0.048
exm1352045	17	72613389	rs144682080	T/C	CD300E	NS	9233	0.000331345	0.001165	0	0	0	0	5.621	0.00059	7.232	0.00019	5.802	0.021	0.65
exm2218534	11	36596427	rs4151032	T/C	RAG1	NS	9233	0.000795229	0	0	0.002982	0	0	2.774	0.0064	4.067	0.00019	2.382	0.4	0.63
exm606395	7	12620790	rs116532633	G/C	SCIN	NS	9233	0.0124586	0.0424	0	0	0.00192	0.0002973	1.483	0.0039	1.831	0.00019	1.211	0.49	0.48
exm1158231	15	45401034	rs139786814	T/C	DUOX2	NS	9223	0.000928998	0.003263	0	0	0	0	2.619	0.021	4.61	0.0002	1.372	0.76	0.34
exm1308525	17	28295809	rs185083507	G/A	EFCAB5	SP	9233	0.0010603	0.003495	0	0	0.000384	0	2.55	0.012	4.084	0.00021	0.819	0.85	0.19
exm744838	9	32542016	rs149817592	C/T	TOPORS	NS	9230	0.000795334	0.002796	0	0	0	0	2.755	0.018	4.819	0.00021	1.341	0.78	0.28
exm1156850	15	43939642	rs8042868	T/C	CATSPER2	NS	9232	0.194393	0.2358	0.1414	0.2514	0.1697	0.1052	0.896	0.0066	0.827	0.00024	1.056	0.54	0.019
exm259644	2	207173160	rs144699200	T/C	ZDBF2	NS	9233	0.00894632	0.006058	0.004963	0.02386	0.000768	0.002081	0.517	0.0016	0.301	0.00024	0.784	0.6	0.069
exm685657	8	18257583	rs45477599	A/T	NAT2	NS	9233	0.000331345	0.001165	0	0	0	0	4.21	0.011	7.456	0.00024	2.333	0.43	0.49
exm292439	3	14180693	rs139590716	C/G	TMEM43	NS	9233	0.00145792	0	0	0.00497	0	0.0005945	2.192	0.0068	2.972	0.00026	3.352	0.029	0.88
exm46031	1	38032607	rs116251390	T/C	GNL2	SP	9233	0.00311465	0.01048	0	0	0.000768	0	1.959	0.0049	2.636	0.00026	1.025	0.97	0.11
exm-rs7746553	6	31895973	rs7746553	G/C	CFB	other/HLA	9233	0.166004	0.2661	0.2084	0.08623	0.1252	0.1552	1.131	0.0031	1.205	0.00027	0.956	0.64	0.016
exm1306077	17	26940561	rs140829639	G/A	SGK494	NS	9217	0.000398459	0.001407	0	0	0	0	4.222	0.0075	6.949	0.00027	3.609	0.22	0.53
exm2256329	4	126373835	rs150894545	T/C	FAT4	S	9233	0.000596422	0.002097	0	0	0	0	2.838	0.033	5.356	0.00027	<<	0.5	0.073
exm2274032	4	87653856	rs61757790	C/G	PTPN13	NS	9233	0.00119284	0.004194	0	0	0	0	2.878	0.0024	3.955	0.00027	2.156	0.3	0.35
exm1508295	19	55748338	rs61743087	A/G	PPP6R1	SP	9233	0.00112657	0.003495	0	0	0.000384	0.0002973	2.89	0.0026	3.97	0.00028	2.049	0.34	0.42
exm1369574	17	80137043	rs140732712	G/C	CCDC57	NS	9233	0.00271703	0.008621	0	0	0.001152	0.0002973	1.875	0.017	2.826	0.00029	0.732	0.67	0.072
exm334765	3	101476645	rs145072852	T/C	CEP97	NS	9233	0.000927767	0.000932	0	0	0.00192	0.001486	3.123	0.0008	3.785	0.00029	2.142	0.31	0.44
exm536688	6	32796793	rs4148876	A/G	TAP2	NS	9233	0.0811133	0.01561	0.04467	0.1404	0.1033	0.08532	0.848	0.0049	0.761	0.00029	1.292	0.031	1e-05
exm645071	7	100691288	rs144198145	T/A	MUC17	NS	9233	0.00178926	0.005825	0	0	0.000768	0	2.675	0.00073	3.303	0.00029	2.957	0.039	0.63
exm1202861	16	1706275	NA	T/C	CRAMP1L	NS	9224	0.00072983	0.000466	0	0.001247	0.0007686	0.0005949	3.751	0.0003	4.242	0.0003	3.062	0.14	0.7
exm239690	2	169764368	rs146779637	T/C	G6PC2	ST	9233	0.000530152	0.000233	0.001241	0	0	0.001784	4.055	0.00086	5.019	0.0003	2.695	0.34	0.41
exm300717	3	38355325	rs116741759	A/G	SLC22A14	NS	9233	0.000795229	0.001864	0.001241	0.0002485	0.000384	0.0002973	3.051	0.0046	4.41	0.00031	3.898	0.027	0.81
exm1039544	12	113603678	rs35080925	A/G	DDX54	NS	9233	0.00072896	0.00233	0	0	0.000384	0	2.475	0.047	4.745	0.00032	<<	0.36	0.043
exm200801	2	71376471	rs115361918	A/G	MPHOSPH10	NS	9233	0.00159046	0.000466	0.002481	0.0002485	0.00384	0.002675	2.2	0.0057	2.973	0.00032	2.384	0.1	0.69
exm2272791	19	41947635	rs7260605	C/T	C19orf69	other	9232	0.477667	0.5363	0.5174	0.3738	0.4535	0.5363	0.919	0.0068	0.87	0.00032	0.942	0.39	0.35
exm293049	3	14755667	rs141714657	C/G	C3orf20	SP	9233	0.000397614	0.000699	0	0	0.000384	0.0005945	5.404	0.0003	6.354	0.00033	4.609	0.05	0.55
exm102376	1	153520235	rs138355706	A/G	S100A3	NS	9233	0.000596422	0.002097	0	0	0	0	3.072	0.017	5.259	0.00035	<<	0.49	0.13
exm1352751	17	72875670	NA	A/C	FADS6	NS	9233	0.000463883	0.001631	0	0	0	0	4.213	0.0029	5.997	0.00035	<<	0.54	0.1
exm852089	10	104176384	rs144256363	G/T	PSD	NS	9231	0.000331389	0.001165	0	0	0	0	3.748	0.026	7.18	0.00035	<<	0.58	0.16
exm942884	11	76813968	rs2233547	A/G	OMP	NS	9233	0.0019218	0.006757	0	0	0	0	2.669	0.00026	3.129	0.00035	3.064	0.012	0.95
exm1704899	11	19256365	NA	G/A	E2F8	NS	9233	0.000927767	0	0.002481	0.002982	0	0	3.224	0.00055	3.686	0.00037	3.182	0.11	0.85
exm843930	10	96541615	rs6413438	T/C	CYP2C19	NS	9233	0.000596422	0.002097	0	0	0	0	3.513	0.0052	5.205	0.00037	<<	0.45	0.12
exm943000	11	76834837	rs143494790	A/G	CAPN5	NS	9233	0.00112657	0.003029	0	0	0.001536	0	3.922	1.5e-05	3.856	0.00037	4.523	0.0035	0.89
exm2255793	3	157081214	rs73873651	T/C	PTX3	S	9233	0.0010603	0.003029	0	0	0.001152	0	2.547	0.013	3.965	0.00038	0.887	0.91	0.24
S2.2 ER- vs. Control
														Overall		ER+		ER-
SNP	Chr	Position	SNP ID	A1/A2	Gene	Type	No. of samples	MAF	AA_MAF	NH_MAF	JA_MAF	LA_MAF	EA_MAF	OR	P	OR	P	OR	P	P_Het
exm2250826	1	227174318	rs141270350	T/C	ADCK3	S	7986	0.000662691	0.00233	0	0	0	0	3.141	0.0094	0.624	0.65	12.372	1.2e-09	0.00083
exm1165463	15	59009800	rs144893047	T/C	ADAM10	NS	7986	0.00112657	0.003961	0	0	0	0	2.5	0.011	0.443	0.42	8.521	1.3e-09	0.00025
exm221867	2	113539232	rs142134831	T/G	IL1A	NS	7986	0.000927767	0.003029	0	0	0.000384	0	4.04	5e-05	3.167	0.0097	9.268	1.3e-08	0.074
exm220393	2	110959008	rs145479679	G/T	NPHP1	NS	7971	0.00139442	0.004662	0	0	0	0.0002973	2.245	0.021	1.413	0.53	7.398	8.4e-08	0.0028
exm61019	1	54476084	rs145889899	T/C	LDLRAD1	SP	7986	0.00185553	0.006524	0	0	0	0	3.743	2.5e-07	2.565	0.0095	6.171	1.4e-07	0.037
exm645918	7	101183198	rs190166648	T/C	EMID2	NS	7986	0.000331345	0.000699	0	0	0	0.0005945	3.525	0.025	2.17	0.35	14.509	1.5e-07	0.0041
exm492809	5	147505341	NA	A/G	SPINK5	NS	7986	0.000795229	0.002796	0	0	0	0	3.195	0.0047	1.982	0.28	9.565	1.6e-07	0.0045
exm1253047	16	69727480	rs145602190	G/A	NFAT5	NS	7986	0.00251822	0.002097	0.003722	0	0.003456	0.005054	1.759	0.026	1.401	0.32	5.389	1.7e-07	0.0011
exm1292126	17	8273026	rs78738842	A/G	KRBA2	NS	7986	0.00245195	0	0	0.009195	0	0	1.937	0.0084	1.93	0.028	6.421	2.7e-07	0.016
exm741581	9	18928963	rs150639454	A/G	FAM154A	NS	7986	0.000596422	0.002097	0	0	0	0	2.491	0.076	<<	0.24	11.098	2.7e-07	0.002
exm2276233	12	15734702	rs144347297	A/C	PTPRO	NS	7986	0.00139165	0.001864	0	0	0.004992	0	3.331	2.9e-05	3.312	0.0005	6.467	3e-07	0.16
exm2271165	9	7385490	rs2148360	T/C	KDM4C	other/AIMS	7985	0.3921	0.4315	0.2258	0.004473	0.4666	0.7879	1.114	0.0083	1.006	0.91	1.536	8.1e-07	2.6e-05
exm2148820	7	36662843	NA	C/A	AOAH	NS	7986	0.00072896	0	0	0.002734	0	0	2.523	0.023	1.461	0.52	9.929	8.7e-07	0.0029
exm588870	6	154412236	rs17174822	T/C	OPRM1	NS	7986	0.000530152	0.001864	0	0	0	0	3.466	0.0093	1.652	0.53	10.647	1e-06	0.021
exm523731	6	27293272	NA	A/G	FKSG83	NS	7986	0.000397614	0.000932	0.001241	0.0002485	0	0	3.519	0.018	<<	0.26	11.823	1.7e-06	0.001
exm561618	6	75994198	rs151068918	C/T	TMEM30A	NS	7986	0.000596422	0.002097	0	0	0	0	2.929	0.027	1.553	0.57	10.764	2.1e-06	0.019
exm500780	5	160042905	rs150012142	C/T	ATP10B	NS	7986	0.000463883	0.000233	0	0	0.001536	0.0005945	4.53	0.0005	4.246	0.0039	10.108	3.6e-06	0.08
exm869820	11	284328	rs142448057	C/G	NLRP6	NS	7985	0.00159067	0.005361	0.001241	0	0	0	1.53	0.25	0.253	0.15	5.777	4.3e-06	4.3e-05
exm389790	4	10527472	rs189581402	C/T	CLNK	NS	7986	0.00139165	0.00466	0	0	0	0.0002973	2.205	0.025	1.376	0.56	6.462	4.4e-06	0.0062
exm82022	1	110280921	rs146952826	T/C	GSTM3	NS	7986	0.00072896	0.002563	0	0	0	0	2.173	0.12	1.23	0.79	9.731	4.4e-06	0.0084
exm643976	7	100675940	rs145279256	G/A	MUC17	NS	7984	0.00218746	0.001165	0.002481	0.0002486	0.002306	0.005648	1.773	0.034	1.245	0.55	5.11	4.6e-06	0.0026
exm1584359	22	18901008	rs144323192	A/G	PRODH	NS	7986	0.000463883	0.001631	0	0	0	0	3.843	0.0058	3.825	0.024	10.748	4.9e-06	0.11
exm688317	8	22398155	rs117993834	G/A	PPP3CC	NS	7986	0.00291584	0.001864	0.001241	0	0.004992	0.00654	1.493	0.1	1.21	0.55	4.177	5.1e-06	0.0014
exm697120	8	39027494	NA	A/G	ADAM32	NS	7986	0.000397614	0.001165	0	0	0.000384	0	3.588	0.021	2.531	0.25	11.94	5.6e-06	0.03
exm1160927	15	50593003	rs141883945	C/T	GABPB1	NS	7986	0.0010603	0.000466	0.001241	0	0.000768	0.00327	2.248	0.022	1.517	0.39	7.096	5.9e-06	0.022
exm866617	10	134261392	rs148966337	A/G	C10orf91	NS	7971	0.00570897	0.01888	0	0	0.001922	0	1.87	0.00067	1.329	0.29	3.223	7.6e-06	0.042
exm1441288	19	17316802	rs75251420	A/G	MYO9B	NS	7986	0.000927767	0.000466	0.002481	0	0.000384	0.002675	1.771	0.17	1.221	0.73	7.782	8.7e-06	0.016
exm1308404	17	27959223	rs140696098	G/C	SSH2	NS	7986	0.000397614	0.001398	0	0	0	0	4.041	0.01	1.3	0.81	11.382	1e-05	0.028
exm320847	3	52409393	rs149319231	C/A	DNAH1	NS	7986	0.000397614	0.001398	0	0	0	0	3.508	0.022	2.365	0.28	11.143	1e-05	0.079
exm1052050	12	132322812	rs143543400	A/C	MMP17	NS	7986	0.00119284	0.000932	0.001241	0	0.001536	0.002675	1.967	0.048	1.271	0.61	5.995	1.1e-05	0.0018
exm472766	5	118324108	NA	G/C	DTWD2	NS	7983	0.000662778	0.002331	0	0	0	0	3.135	0.01	2.737	0.083	8.62	1.1e-05	0.068
exm1328326	17	42335888	rs28931583	C/G	SLC4A1	NS	7978	0.000397931	0.001402	0	0	0	0	2.988	0.061	1.168	0.89	10.979	1.4e-05	0.011
exm305650	3	44635975	rs149108320	A/G	ZNF660	NS	7986	0.000463883	0.001398	0	0	0.000384	0	3.315	0.02	0.906	0.93	10.235	1.4e-05	0.004
exm631485	7	86990819	rs144004176	C/A	CROT	NS	7986	0.000463883	0.000233	0	0	0.000768	0.001189	2.115	0.12	1.236	0.79	7.369	1.4e-05	0.0035
exm1704212	1	118441771	rs77073478	A/G	GDAP2	NS	7986	0.00112657	0	0.002481	0.003728	0	0	1.536	0.27	1	1	7.216	1.5e-05	0.00042
exm976716	12	6128454	rs141211612	A/G	VWF	NS	7984	0.000464006	0.001632	0	0	0	0	4.574	0.0011	3.055	0.092	9.447	1.6e-05	0.047
exm1896189	17	61897716	rs115348708	G/C	FTSJ3	NS	7983	0.00086184	0	0	0.003234	0	0	2.001	0.096	1.087	0.9	8.687	1.7e-05	0.0017
exm1482755	19	46733560	rs187146043	G/T	IGFL1	NS	7986	0.00337972	0.003029	0.001241	0.0002485	0.00768	0.004756	1.359	0.19	0.899	0.75	3.781	1.9e-05	7.2e-05
exm985889	12	12815037	rs41276680	T/C	GPR19	NS	7986	0.00848244	0.005592	0.01117	0	0.01267	0.01843	1.19	0.27	0.838	0.42	2.823	1.9e-05	9.6e-05
exm1002973	12	51457921	rs142643949	C/T	CSRNP2	NS	7986	0.000463883	0.000932	0	0	0.000768	0.0002973	1.628	0.44	<<	0.26	9.589	2e-05	0.00039
exm176094	2	21263886	rs9282603	G/A	APOB	NS	7983	0.00125961	0.004427	0	0	0	0	1.565	0.27	0.66	0.58	5.872	2e-05	0.0013
exm389512	4	10022947	rs144053854	T/C	SLC2A9	NS	7986	0.00119284	0.004194	0	0	0	0	2.708	0.0051	2.128	0.13	6.384	2e-05	0.045
exm1988458	2	165552167	rs150990193	C/T	COBLL1	NS	7985	0.00251856	0	0.003722	0.008702	0	0	1.025	0.93	0.838	0.65	4.823	2.1e-05	0.00021
exm1603968	22	36556882	rs148712729	C/T	APOL3	NS	7985	0.000662778	0.002097	0	0	0.000384	0	3.899	0.00097	2.03	0.28	7.986	2.2e-05	0.069
exm921744	11	63987441	rs75295961	G/C	FERMT3	NS	7986	0.00072896	0.00233	0.001241	0	0	0	1.599	0.35	0.591	0.61	6.822	2.4e-05	0.0069
exm1264428	16	84270890	rs35075881	C/T	KCNG4	NS	7969	0.00192563	0.006776	0	0	0	0	2.056	0.015	1.147	0.77	4.906	2.5e-05	0.035
exm575893	6	123673686	NA	C/T	TRDN	NS	7986	0.00072896	0.000932	0	0	0	0.002081	2.123	0.091	0.858	0.84	8.285	2.6e-05	0.00052
exm853414	10	105215062	NA	T/C	CALHM1	NS	7986	0.000795229	0	0	0.002734	0	0.0002973	1.232	0.68	0.737	0.69	8.323	2.6e-05	0.001
exm1404168	19	2425409	NA	G/C	TMPRSS9	NS	7979	0.00304959	0.01072	0	0	0	0	2.012	0.0038	1.595	0.17	3.786	3.1e-05	0.011
exm673141	7	151071225	NA	T/C	NUB1	NS	7986	0.000861498	0.002796	0	0.0002485	0	0	1.848	0.19	0.504	0.5	7.219	3.1e-05	0.0021
exm2063645	4	110384078	rs189098852	C/A	SEC24B	NS	7986	0.000397614	0	0	0	0.00192	0.0002973	2.164	0.18	0.676	0.72	8.9	3.4e-05	0.00071
exm267374	2	220038094	rs73074979	A/G	CNPPD1	NS	7986	0.000662691	0.002097	0	0	0	0.0002973	3.659	0.0018	2.38	0.14	7.506	3.7e-05	0.035
exm490276	5	141029036	rs116801073	A/G	FCHSD1	NS	7986	0.00205434	0.006757	0	0	0.000768	0	1.643	0.13	1.095	0.85	4.882	3.7e-05	0.006
exm1785790	1	27677375	rs187197622	A/G	SYTL1	NS	7986	0.000795229	0	0.002481	0.002485	0	0	2.974	0.0035	2.011	0.16	7.992	3.8e-05	0.038
exm553292	6	46996760	rs143669522	A/G	GPR110	NS	7986	0.00112657	0.001398	0	0	0.001536	0.002081	2.882	0.0012	2.481	0.026	5.911	3.8e-05	0.13
exm980648	12	7528404	rs150856487	T/C	CD163L1	NS	7986	0.00139165	0.000466	0	0	0.001152	0.004756	1.307	0.48	0.597	0.4	5.746	3.8e-05	0.00085
exm85597	1	114442885	rs141417436	G/A	AP4B1	NS	7986	0.00072896	0.000699	0	0	0	0.002378	1.173	0.77	0.378	0.34	8.112	4.1e-05	8.5e-05
exm1119983	14	89178711	NA	C/T	EML5	NS	7986	0.00132538	0.00466	0	0	0	0	1.367	0.44	<<	0.08	4.901	4.2e-05	0.00037
exm497836	5	151784533	rs139903210	A/C	NMUR2	NS	7986	0.000861498	0.002796	0	0	0.000384	0	1.752	0.21	0.514	0.52	5.612	4.2e-05	0.0068
exm983342	12	10277906	rs59819090	A/G	CLEC7A	NS	7986	0.0119284	0.03728	0.002481	0	0.005376	0.001189	1.322	0.053	1.042	0.84	2.396	4.2e-05	0.0016
exm373267	3	193332564	rs145565705	G/C	OPA1	NS	7986	0.000530152	0.001864	0	0	0	0	2.254	0.15	<<	0.29	9.371	4.5e-05	0.0012
exm1351609	17	72366770	rs150121973	A/G	GPR142	NS	7986	0.000463883	0	0.001241	0.001491	0	0	1.752	0.34	1.347	0.71	10.866	4.6e-05	0.021
exm907961	11	55563035	rs75255607	G/A	OR5D14	NS	7984	0.0054355	0.01911	0	0	0	0	1.54	0.036	0.725	0.37	3.147	4.7e-05	0.00046
exm1035689	12	109994870	rs9593	A/T	MMAB	NS	7984	0.480048	0.2859	0.3945	0.7042	0.5065	0.4599	1.133	0.00015	1.067	0.11	1.354	4.9e-05	0.0019
exm1499716	19	53057722	rs144870963	G/A	ZNF808	NS	7986	0.0010603	0.000699	0	0.003231	0	0	1.779	0.15	1.586	0.37	7.424	5e-05	0.036
exm2002174	22	23482658	rs74701880	T/C	RTDR1	SP	7986	0.0270378	0.08877	0	0	0.008065	0.001784	1.293	0.012	1.147	0.32	1.991	5.2e-05	0.022
exm2221874	13	95899303	rs11568689	C/G	ABCC4	NS	7986	0.000463883	0	0.003722	0.000994	0	0	2.84	0.039	1.732	0.43	11.218	5.2e-05	0.0052
exm702703	8	61654847	rs61995713	G/A	CHD7	NS	7986	0.00218688	0.00699	0	0	0.001152	0	1.394	0.32	0.417	0.22	4.391	5.2e-05	0.0011
exm787069	9	131762080	rs73624835	G/A	NUP188	NS	7985	0.00251856	0.008854	0	0	0	0	2.352	0.001	2.303	0.012	4.289	5.2e-05	0.19
exm1522239	20	3673557	NA	A/G	SIGLEC1	NS	7986	0.000530152	0	0	0.001988	0	0	1.827	0.26	0.53	0.54	9.722	5.4e-05	0.0015
exm1889119	17	43247151	NA	A/G	HEXIM2	NS	7986	0.000463883	0.001631	0	0	0	0	2.219	0.17	0.918	0.94	9.025	5.4e-05	0.016
exm1497144	19	51957493	rs140402033	C/T	SIGLEC8	NS	7986	0.00119284	0.003495	0	0	0.001152	0	1.507	0.34	0.676	0.6	5.81	5.6e-05	0.0062
exm1501219	19	53747024	rs116784215	G/C	ZNF677	NS	7986	0.0010603	0.003728	0	0	0	0	2.4	0.024	1.633	0.39	6.492	5.6e-05	0.059
exm1486441	19	48734262	rs150982505	A/C	CARD8	SP	7986	0.00072896	0.000932	0	0	0.000768	0.001486	2.307	0.053	1.673	0.38	6.906	5.7e-05	0.016
exm834117	10	75135891	rs73272348	G/C	ANXA7	NS	7984	0.00119316	0.003495	0	0	0.000768	0.0002973	2.104	0.051	1.729	0.28	5.831	5.7e-05	0.22
exm187327	2	37513340	rs141998414	T/C	PRKD3	NS	7986	0.000530152	0.000466	0	0	0.000384	0.001486	4.52	0.0002	2.545	0.095	8.453	5.8e-05	0.054
exm3243	1	1322654	rs151152085	T/C	CCNL2	NS	7986	0.000795229	0.001864	0	0	0.001152	0.0002973	2.644	0.02	2.439	0.089	6.826	6.1e-05	0.14
exm828396	10	69672479	rs116040871	A/G	SIRT1	NS	7986	0.00072896	0.000466	0.001241	0	0	0.002378	3.291	0.0017	2.16	0.12	7.682	6.1e-05	0.073
exm1163344	15	54305612	rs137929834	A/G	UNC13C	NS	7986	0.00198807	0.001631	0.001241	0	0.003072	0.004162	2.019	0.0095	1.733	0.11	4.529	6.2e-05	0.033
exm1536775	20	33872215	rs1802241	A/C	EIF6	NS	7986	0.00437376	0.003262	0.007444	0	0.005376	0.009512	1.373	0.13	1.274	0.35	3.302	6.4e-05	0.0098
exm744048	9	27009095	rs144847384	C/T	IFT74	NS	7982	0.00106087	0.003498	0	0	0	0.0002973	2.542	0.012	1.508	0.46	5.88	6.4e-05	0.042
exm749689	9	35740902	rs113785628	T/C	GBA2	NS	7986	0.00331345	0.003728	0.002481	0	0.00192	0.008026	1.36	0.21	1.06	0.86	3.81	6.6e-05	0.0021
exm-rs2743941	6	29755451	rs116385383	A/G	IFITM4P	other/HLA	7982	0.207372	0.2797	0.352	0.1104	0.159	0.2339	1.072	0.066	1.04	0.41	1.371	6.8e-05	0.00092
exm-rs7134594	12	110000193	rs7134594	C/T	MMAB	other/GWAS	7982	0.478982	0.2853	0.3958	0.6992	0.5069	0.4608	1.134	0.00013	1.07	0.099	1.344	6.9e-05	0.0026
exm1313219	17	34191290	rs141245415	T/C	C17orf66	NS	7986	0.00132538	0.004427	0.001241	0	0	0	1.802	0.13	1.419	0.53	5.683	6.9e-05	0.052
exm2273852	2	204111603	rs182035689	A/C	CYP20A1	NS	7986	0.000463883	0	0.001241	0.001491	0	0	2.586	0.059	2.38	0.16	10.337	7e-05	0.058
exm1550192	20	50048783	rs145231526	A/G	NFATC2	NS	7986	0.00258449	0.006757	0.001241	0.001988	0.000384	0	1.637	0.081	0.777	0.6	4.133	7.4e-05	0.003
exm772531	9	114508557	rs41306457	A/G	C9orf84	NS	7985	0.00682662	0.004194	0.001241	0	0.006533	0.01992	1.4	0.042	1.192	0.4	2.79	7.7e-05	0.0097
exm90540	1	144922638	rs141066291	A/T	PDE4DIP	SP	7985	0.000861612	0.002563	0	0	0.000768	0	1.932	0.14	0.484	0.48	6.565	7.9e-05	0.00018
exm505376	5	176013823	rs116138699	T/C	CDHR2	NS	7986	0.00251822	0.002097	0.003722	0	0.003072	0.005351	1.875	0.011	1.05	0.9	4.073	8e-05	0.0027
exm1291016	17	8046147	rs12937495	T/C	PER1	NS	7986	0.000795229	0.000233	0.001241	0	0.001536	0.001784	2.389	0.027	1.521	0.43	6.572	8.2e-05	0.029
exm2033363	3	111923150	NA	C/T	SLC9A10	NS	7965	0.000863902	0	0	0.00326	0	0	1.951	0.1	1.586	0.38	7.313	8.7e-05	0.022
exm259638	2	207172889	rs146428765	T/C	ZDBF2	NS	7986	0.00284957	0.009786	0	0	0	0.0002973	1.93	0.012	1.431	0.34	4.081	8.7e-05	0.057
exm1160054	15	49059638	NA	A/G	CEP152	NS	7986	0.000463883	0.001398	0	0	0	0.0002973	2.829	0.054	1.755	0.48	8.438	8.9e-05	0.092
exm575228	6	119399385	rs192266016	T/G	FAM184A	NS	7985	0.000994168	0.003497	0	0	0	0	3.907	6.2e-05	3.115	0.01	6.368	8.9e-05	0.21
exm1307567	17	27417925	rs115455253	T/C	MYO18A	NS	7984	0.00112687	0.003965	0	0	0	0	1.838	0.16	1.306	0.67	6.169	9.3e-05	0.018
exm91566	1	145562149	rs143087712	A/C	ANKRD35	NS	7986	0.00245195	0.007689	0	0	0.001536	0	2.004	0.01	1.691	0.15	4.101	9.3e-05	0.04
exm1190249	15	91428327	rs28510611	A/C	FES	NS	7986	0.00145792	0.004893	0	0	0.000384	0	1.596	0.22	0.594	0.48	5.352	9.4e-05	0.0062
exm1963890	20	33874600	rs78127944	T/C	FAM83C	NS	7985	0.0055666	0	0	0.02087	0	0	1.02	0.93	0.779	0.38	3.446	9.5e-05	0.00019
exm1326183	17	41106983	rs146878083	C/T	AARSD1	SP	7986	0.000596422	0.002097	0	0	0	0	1.94	0.23	0.711	0.75	8.168	0.0001	0.012
A1/A2: minor allele/major allele
MAF: minor allele frequency in controls
P_Het: p-value from case-only testing (ER+ vs ER-)
NS: non-synonymous; S: synonymous; SP: splice site
Adjusted for age and the first 10 eigenvectors
AA: African American; NH: Native Hawaiian; JA: Japanese American; LA: Latino; EA: European American
