# Supplementary material for: Genome-Wide Testing of Putative Functional Exonic Variants in Relationship with Breast and Prostate Cancer Risk in a Multiethnic Population
Source: PLoS Genet. 2013 Mar 28;9(3):e1003419. doi: 10.1371/journal.pgen.1003419 (PMC3610631; doi:10.1371/journal.pgen.1003419)
Supplement: Table S3 — One hundred most significant single SNP associations with prostate cancer; over all ethnic groups (S3.1) and by ethnic group (S3.2–6). (XLSX) [file pgen.1003419.s005.xlsx]

## Sheet: Sheet1
Supplemental Table S3: One Hundred Most Significant Single SNP Associations with Prostate Cancer; Over all Ethnic Groups (S3.1) and by Ethnic Group (S3.2-6)
S3.1 Overall
							Overall					African American				Native Hawaiian				Japanese American				Latino				European American
SNP	Chr	Position	SNP ID	A1/A2	Gene	Type	No. of samples	MAF	OR	P	P_Het	No. of samples	MAF	OR	P	No. of samples	MAF	OR	P	No. of samples	MAF	OR	P	No. of samples	MAF	OR	P	No. of samples	MAF	OR	P
exm-rs16901979	8	128124916	rs16901979	A/C	PCAT1	other/GWAS	11920	0.177999	1.473	6.2e-25	0.7	3263	0.3847	1.36	1.1e-08	571	0.1216	2.386	4.9e-07	3034	0.1774	1.516	4.1e-10	2492	0.03533	1.767	5.4e-05	2560	0.03894	1.303	0.065
exm-rs7837688	8	128539360	rs7837688	T/G	LOC727677	other/GWAS	11920	0.097283	1.51	6.8e-22	0.17	3263	0.05638	1.349	0.0043	571	0.1787	2.008	1.1e-05	3034	0.1461	1.564	5.5e-10	2492	0.06682	1.745	1e-07	2560	0.09512	1.264	0.012
exm-rs1456315	8	128103937	rs1456315	G/A	PCAT1	other/GWAS	11920	0.498343	0.762	8.6e-22	0.3	3263	0.4811	0.866	0.007	571	0.5161	0.586	0.00016	3034	0.341	0.613	4.4e-15	2492	0.5246	0.835	0.0017	2560	0.684	0.764	1.3e-05
exm-rs4242384	8	128518554	rs4242384	C/A	LOC727677	other/GWAS	11920	0.127104	1.436	6.8e-21	0.48	3263	0.1328	1.241	0.0034	571	0.1935	2.056	5.7e-06	3034	0.1638	1.526	8.6e-10	2492	0.07796	1.664	1.6e-07	2560	0.0981	1.258	0.013
exm-rs4242382	8	128517573	rs4242382	A/G	LOC727677	other/GWAS	11920	0.176342	1.349	1.3e-17	0.91	3263	0.2917	1.11	0.069	571	0.2035	1.976	1.5e-05	3034	0.1667	1.533	4.6e-10	2492	0.08986	1.651	3.9e-08	2560	0.1011	1.254	0.013
exm-rs1447295	8	128485038	rs1447295	A/C	LOC727677	other/GWAS	11920	0.17674	1.327	9.9e-16	0.88	3263	0.2912	1.141	0.02	571	0.1998	2.109	2.2e-06	3034	0.173	1.417	4e-07	2492	0.08525	1.566	1.9e-06	2560	0.1005	1.258	0.012
exm-rs1016343	8	128093297	rs1016343	T/C	PCAT1	other/GWAS	11916	0.203925	1.297	1.5e-15	0.85	3261	0.2114	1.057	0.38	571	0.1501	1.353	0.098	3033	0.2631	1.459	1.1e-10	2491	0.138	1.141	0.11	2560	0.1876	1.535	1.2e-09
exm-rs7130881	11	68995958	rs7130881	G/A	MYEOV	other/GWAS	11920	0.107422	1.26	9.4e-08	0.67	3263	0.1584	1.208	0.0065	571	0.05707	1.182	0.57	3034	0.004473	1.654	0.16	2492	0.111	1.162	0.094	2560	0.1748	1.352	5.1e-05
exm-rs10896449	11	68994667	rs10896449	G/A	MYEOV	other/GWAS	11920	0.396355	1.183	1.1e-07	0.73	3263	0.6687	1.089	0.13	571	0.3933	1.326	0.062	3034	0.04374	1.219	0.11	2492	0.3391	1.195	0.0034	2560	0.5158	1.235	0.00041
exm-rs13252298	8	128095156	rs13252298	G/A	PCAT1	other/GWAS	11920	0.266269	0.844	1.8e-07	0.78	3263	0.07968	0.939	0.54	571	0.4677	0.66	0.0031	3034	0.3611	0.723	4.3e-08	2492	0.3364	0.982	0.77	2560	0.2883	0.884	0.063
exm-rs1512268	8	23526463	rs1512268	A/G	NKX3-1	other/GWAS	11919	0.48277	1.155	2.4e-07	0.86	3263	0.6274	1.144	0.016	571	0.5409	1.065	0.66	3033	0.3765	1.25	7.9e-05	2492	0.4447	1.171	0.0066	2560	0.4408	1.108	0.083
exm-rs6983267	8	128413305	rs6983267	T/G	POU5F1B	other/GWAS	11920	0.436912	0.857	3.9e-07	0.87	3263	0.1493	0.807	0.0093	571	0.7072	0.545	5e-05	3034	0.6762	0.837	0.0019	2492	0.394	0.857	0.011	2560	0.486	0.954	0.42
exm-rs12653946	5	1895829	rs12653946	T/C	IRX4	other/GWAS	11919	0.433059	1.15	4.1e-07	0.9	3263	0.4	1.142	0.013	571	0.3772	1.73	5.8e-05	3034	0.4456	1.289	6.8e-06	2492	0.4858	1.046	0.45	2559	0.4328	1.072	0.24
exm-rs10505477	8	128407443	rs10505477	C/T	POU5F1B	other/GWAS	11919	0.460631	0.861	4.4e-07	0.85	3263	0.2104	0.86	0.028	571	0.7097	0.544	4.3e-05	3034	0.6814	0.84	0.0024	2492	0.4105	0.856	0.0089	2559	0.4949	0.942	0.31
exm-rs445114	8	128323181	rs445114	C/T	POU5F1B	other/GWAS	11920	0.490126	0.869	5.9e-07	0.61	3263	0.6475	0.935	0.23	571	0.361	0.748	0.055	3034	0.4814	0.873	0.013	2492	0.4078	0.873	0.023	2560	0.3945	0.794	0.0002
exm514211	6	6266854	rs140712764	T/C	F13A1	NS	11920	6.62691e-05	28.007	9.1e-07	0.66	3263	0.000233	6.751	0.049	571	0	NA	NA	3034	0	>999.999	5.5e-06	2492	0	NA	NA	2560	0	NA	NA
exm-rs6545977	2	63301164	rs6545977	A/G	OTX1	other/GWAS	11919	0.407952	0.877	6e-06	0.64	3263	0.5196	0.862	0.0052	571	0.3821	0.764	0.061	3034	0.1866	0.919	0.24	2492	0.4482	0.882	0.029	2559	0.5054	0.885	0.042
exm199465	2	70052624	rs146778617	T/G	ANXA4	NS	11920	0.00072896	4.523	6e-06	0.46	3263	0.002563	4.239	1.8e-05	571	0	NA	NA	3034	0	NA	NA	2492	0	>999.999	0.32	2560	0	NA	NA
exm-rs10486567	7	27976563	rs10486567	A/G	JAZF1	other/GWAS	11917	0.491383	0.865	7.7e-06	0.52	3262	0.2942	0.86	0.01	570	0.6281	0.824	0.19	3034	0.9003	0.853	0.077	2492	0.4478	0.955	0.43	2559	0.2548	0.77	0.00031
exm574153	6	117130704	rs2274911	G/A	GPRC6A	NS	11920	0.300199	0.875	1.3e-05	0.76	3263	0.2379	0.776	8.7e-05	571	0.2717	0.896	0.48	3034	0.4332	0.908	0.081	2492	0.2657	0.945	0.38	2560	0.2542	0.857	0.027
exm-rs339331	6	117210052	rs339331	C/T	RFX6	other/GWAS	11920	0.296554	0.879	2.1e-05	0.66	3263	0.2519	0.776	6e-05	571	0.2643	0.952	0.75	3034	0.3688	0.898	0.057	2492	0.2803	0.924	0.22	2560	0.2875	0.906	0.13
exm2255553	2	9637331	rs56237316	G/A	ADAM17	S	11920	0.00483764	1.951	2.3e-05	0.51	3263	0.00233	2.923	0.0074	571	0.002481	5.323	0.05	3034	0	>999.999	0.17	2492	0.007296	1.715	0.068	2560	0.01249	1.741	0.011
exm68152	1	70896038	rs145785987	C/T	CTH	NS	11920	0.000198807	9.011	3.1e-05	0.76	3263	0.000699	8.561	6e-05	571	0	NA	NA	3034	0	NA	NA	2492	0	NA	NA	2560	0	>999.999	0.18
exm971959	11	134128968	NA	G/A	ACAD8	NS	11920	0	>999.999	3.2e-05	0.23	3263	0	>999.999	0.17	571	0	NA	NA	3034	0	>999.999	0.00011	2492	0	NA	NA	2560	0	NA	NA
exm-rs7567607	2	43638185	rs7567607	C/T	THADA	other/AIMS	11916	0.425116	1.132	3.9e-05	0.4	3262	0.1848	1.092	0.18	570	0.6117	1.197	0.22	3033	0.6588	1.197	0.0024	2492	0.5311	1.083	0.19	2559	0.3255	1.103	0.12
exm-rs7629490	3	87241497	rs7629490	T/C	MIR4795	other/GWAS	11919	0.357436	1.125	4e-05	0.38	3263	0.2272	0.983	0.78	571	0.3375	1.207	0.18	3033	0.4451	1.175	0.0034	2492	0.4616	1.179	0.0045	2560	0.343	1.13	0.044
exm1105738	14	61180657	rs3742636	T/G	SIX4	NS	11906	0.368344	1.125	4e-05	0.44	3260	0.4256	1.086	0.12	571	0.2742	1.079	0.63	3027	0.4688	1.172	0.0039	2489	0.2479	1.113	0.1	2559	0.2912	1.115	0.087
exm1474666	19	43414890	rs116433230	A/C	PSG6	NS	11920	0.00377734	0.223	4.3e-05	0.37	3263	0.01235	0.243	0.00014	571	0	NA	NA	3034	0	NA	NA	2492	0.001536	<0.001	0.091	2560	0	NA	NA
exm-rs12621278	2	173311553	rs12621278	G/A	ITGA6	other/GWAS	11920	0.100928	0.816	5.4e-05	0.71	3263	0.01701	0.821	0.37	571	0.1042	0.695	0.14	3034	0.2331	0.874	0.045	2492	0.08065	0.804	0.053	2560	0.0648	0.639	0.0013
exm506442	5	176637576	rs28932178	C/T	NSD1	NS	11920	0.263552	0.871	6.1e-05	0.022	3263	0.1051	1.028	0.75	571	0.4243	0.937	0.65	3034	0.5249	0.87	0.01	2492	0.217	0.838	0.016	2560	0.1507	0.761	0.0021
exm-rs5945572	23	51229683	rs5945572	A/G	NOT_FOUND	other/GWAS	8351	0.20694	1.116	6.8e-05	0.66	2224	0.2656	1.147	0.0036	335	0.07784	1.34	0.15	2080	0.08412	1.084	0.29	1966	0.1583	1.137	0.039	1746	0.3502	1.064	0.21
exm1507288	19	55527081	rs2304167	C/T	GP6	NS	11919	0.280716	0.879	7e-05	0.87	3263	0.4653	0.82	0.00026	571	0.2903	0.938	0.68	3034	0.2239	0.937	0.33	2492	0.1889	0.836	0.019	2559	0.1819	0.962	0.62
exm1478994	19	45296806	rs3208856	T/C	CBLC	NS	11920	0.0273691	0.687	7.3e-05	0.31	3263	0.04613	0.686	0.0076	571	0.008685	0.97	0.97	3034	0.000497	1.083	0.95	2492	0.01882	0.823	0.39	2560	0.04667	0.626	0.0036
exm969917	11	129739816	NA	A/G	NFRKB	NS	11920	6.62691e-05	19.333	8e-05	0.91	3263	0.000233	18.724	0.00011	571	0	NA	NA	3034	0	NA	NA	2492	0	NA	NA	2560	0	NA	NA
exm-rs7501939	17	36101156	rs7501939	T/C	HNF1B	other/GWAS	11919	0.388587	0.894	8.6e-05	0.048	3263	0.5	0.972	0.58	571	0.2717	0.799	0.15	3033	0.3232	0.789	9.5e-05	2492	0.3326	0.912	0.14	2560	0.396	0.881	0.039
exm1228070	16	25255366	rs61746620	A/G	ZKSCAN2	NS	11918	0.000132556	11.133	8.9e-05	0.22	3262	0.0002331	6.68	0.058	571	0	>999.999	0.24	3034	0.0002485	14.054	0.0012	2491	0	NA	NA	2560	0	NA	NA
exm-rs4430796	17	36098040	rs4430796	G/A	HNF1B	other/GWAS	11920	0.480186	0.895	9e-05	0.0099	3263	0.6412	1.026	0.64	571	0.3127	0.79	0.13	3034	0.3683	0.837	0.0025	2492	0.4163	0.875	0.027	2560	0.4982	0.831	0.0018
exm506434	5	176637240	rs3733875	T/G	NSD1	NS	11920	0.24884	0.87	9.5e-05	0.04	3263	0.07875	1.04	0.68	571	0.4181	0.964	0.8	3034	0.5246	0.871	0.011	2492	0.2089	0.822	0.009	2560	0.1263	0.767	0.0055
exm-rs11228565	11	68978580	rs11228565	A/G	MYEOV	other/GWAS	11920	0.120742	1.177	9.6e-05	0.99	3263	0.1102	0.879	0.15	571	0.1638	1.37	0.076	3034	0.03653	1.102	0.48	2492	0.1321	1.186	0.04	2560	0.2158	1.386	2.9e-06
exm-rs17181170	3	87173324	rs17181170	A/G	MIR4795	other/GWAS	11920	0.342015	0.891	0.00011	0.41	3263	0.2199	0.937	0.33	571	0.361	0.94	0.67	3034	0.3303	0.86	0.011	2492	0.3802	0.871	0.021	2560	0.4777	0.89	0.048
exm-rs7014346	8	128424792	rs7014346	A/G	POU5F1B	other/GWAS	11920	0.313519	1.12	0.00011	0.47	3263	0.3898	1.133	0.02	571	0.2357	1.436	0.021	3034	0.2132	1.186	0.0092	2492	0.3095	1.084	0.2	2560	0.3579	1.057	0.37
exm579601	6	133105120	rs6926101	T/C	C6orf192	NS	11919	0.150716	1.184	0.00012	0.41	3263	0.4252	1.211	0.00042	571	0.03722	1.643	0.094	3033	0.02387	1.115	0.53	2492	0.05146	1.147	0.27	2560	0.05618	1.012	0.92
exm-rs975730	8	129316014	rs975730	C/T	MIR1208	other/GWAS	11918	0.450815	0.896	0.00012	0.96	3263	0.4098	0.847	0.0024	571	0.2878	1.151	0.37	3033	0.3083	0.85	0.0073	2492	0.5611	0.979	0.71	2559	0.6273	0.875	0.03
exm801087	9	139914819	rs140319041	A/G	ABCA2	NS	11916	6.62778e-05	18.91	0.00012	0.38	3260	0	>999.999	0.21	570	0	NA	NA	3034	0	NA	NA	2492	0	NA	NA	2560	0.0002973	16.418	0.00038
exm-rs6910232	6	10902439	rs6910232	G/A	SYCP2L	other/AIMS	11920	0.384626	1.122	0.00013	0.22	3263	0.1761	1.034	0.63	571	0.4603	0.928	0.59	3034	0.6113	1.116	0.058	2492	0.4904	1.244	0.00025	2560	0.2794	1.154	0.026
exm2272575	17	16322676	rs4792739	C/T	TRPV2	other/AIMS	11919	0.228363	1.154	0.00013	0.3	3262	0.5273	1.098	0.086	571	0.1191	1.04	0.85	3034	0.1909	1.224	0.0029	2492	0.06797	1.139	0.24	2560	0.04221	1.273	0.089
exm2270923	8	128491792	rs7836840	T/G	LOC727677	other	11920	0.485487	1.111	0.00014	0.14	3263	0.4369	1.074	0.17	571	0.6005	1.272	0.096	3034	0.5065	1.206	0.00088	2492	0.5077	1.038	0.53	2560	0.4777	1.113	0.068
exm794246	9	136599026	rs147006467	G/C	SARDH	NS	11919	0.000662691	3.946	0.00015	0.43	3263	0.00233	3.904	0.00016	570	0	NA	NA	3034	0	NA	NA	2492	0	NA	NA	2560	0	NA	NA
exm841657	10	93668692	NA	A/G	FGFBP3	NS	11914	0	>999.999	0.00015	0.33	3263	0	>999.999	0.0013	571	0	NA	NA	3034	0	>999.999	0.089	2487	0	NA	NA	2559	0	>999.999	0.19
exm1352239	17	72758167	rs41282065	A/G	SLC9A3R1	NS	11920	0.00212061	0.103	0.00015	0.59	3263	0.00233	<0.001	0.03	571	0	NA	NA	3034	0	NA	NA	2492	0.002304	0.212	0.12	2560	0.004756	0.115	0.012
exm-rs1465618	2	43553949	rs1465618	A/G	THADA	other/GWAS	11919	0.354805	1.128	0.00016	0.64	3262	0.1174	1.09	0.28	571	0.5099	1.192	0.21	3034	0.662	1.178	0.0055	2492	0.4036	1.061	0.33	2560	0.2152	1.125	0.1
exm1311040	17	32688826	rs138527286	C/T	CCL1	NS	11920	0.00304838	2.153	0.00016	0.44	3263	0.01072	2.063	0.00044	571	0	NA	NA	3034	0	NA	NA	2492	0	>999.999	0.093	2560	0	NA	NA
exm1617180	22	45767391	rs9614653	T/C	SMC1B	NS	11918	0.158823	0.859	0.00016	0.94	3263	0.04147	0.71	0.021	571	0.2333	0.715	0.05	3034	0.3168	0.855	0.009	2490	0.1438	0.904	0.24	2560	0.1133	0.941	0.52
exm1374044	18	7231881	rs144753731	G/A	LRRC30	NS	11920	0.00424122	0.369	0.00017	0.48	3263	0.002563	<0.001	0.022	571	0	NA	NA	3034	0	NA	NA	2492	0.009985	0.497	0.037	2560	0.008026	0.276	0.011
exm1508922	19	55897956	rs147614077	A/G	RPL28	NS	11920	0.000198807	7.824	0.00018	0.00046	3263	0.000699	7.605	0.00023	571	0	NA	NA	3034	0	NA	NA	2492	0	NA	NA	2560	0	NA	NA
exm552756	6	46684222	rs1805017	T/C	PLA2G7	NS	11920	0.280252	0.892	0.0002	0.84	3263	0.2903	0.902	0.075	571	0.2829	0.741	0.057	3034	0.2279	0.814	0.0025	2492	0.3587	0.946	0.36	2560	0.2687	0.907	0.15
exm882733	11	5411122	rs114517600	T/C	OR51M1	NS	11920	0.0104705	1.58	0.0002	0.49	3263	0.03495	1.611	0.00016	571	0.001241	<0.001	0.79	3034	0	NA	NA	2492	0.002304	0.861	0.81	2560	0.0002973	4.359	0.2
exm1419304	19	8564474	rs4239541	T/G	PRAM1	NS	11906	0.35919	1.123	0.0002	0.12	3253	0.6842	1.141	0.021	571	0.1563	1.029	0.88	3033	0.1499	1.066	0.4	2490	0.3263	1.111	0.087	2559	0.2701	1.196	0.0058
exm67632	1	68905294	rs114379164	C/G	RPE65	NS	11916	0.000928136	3.304	0.00021	0.36	3262	0.003263	3.251	0.00028	571	0	NA	NA	3034	0	NA	NA	2490	0	NA	NA	2559	0	>999.999	0.18
exm-rs9284813	3	87152169	rs9284813	G/A	VGLL3	other/GWAS	11920	0.235852	1.129	0.00021	0.11	3263	0.3949	0.925	0.16	571	0.1464	1.263	0.21	3034	0.1981	1.336	1e-05	2492	0.1671	1.316	0.00022	2560	0.1528	1.114	0.17
exm829805	10	70863698	rs146830092	T/C	SRGN	NS	11920	0.00159046	2.648	0.00021	0.19	3263	0.005592	2.422	0.00091	571	0	NA	NA	3034	0	NA	NA	2492	0	>999.999	0.081	2560	0	NA	NA
exm1608854	22	39138332	rs138708	A/G	SUN2	NS	11920	0.0587806	0.783	0.00022	0.99	3263	0.008388	0.578	0.12	571	0.04094	0.563	0.2	3034	0.1759	0.8	0.0035	2492	0.01421	1.091	0.71	2560	0.0217	0.652	0.061
exm513682	6	4074822	rs77132955	A/C	C6orf146	NS	11891	0.0241539	1.361	0.00024	0.85	3254	0.07714	1.316	0.0023	571	0.002481	1.397	0.79	3021	0	NA	NA	2489	0.008455	1.742	0.044	2556	0.002973	1.325	0.57
exm-rs366676	6	88717766	rs366676	T/C	SPACA1	other/GWAS	11919	0.474616	0.899	0.00024	0.97	3263	0.6356	0.857	0.0044	571	0.3275	0.715	0.039	3034	0.2532	0.929	0.25	2492	0.4758	0.918	0.15	2559	0.5684	0.936	0.26
exm2272092	14	61443539	rs2296926	C/T	TRMT5	other	11910	0.400477	1.108	0.00024	0.79	3258	0.4305	1.105	0.059	571	0.2792	1.077	0.64	3031	0.497	1.135	0.022	2490	0.3555	1.068	0.27	2560	0.3106	1.108	0.1
exm1250493	16	67919696	rs139776238	A/G	NRN1L	other	11920	0	>999.999	0.00024	0.81	3263	0	>999.999	0.00039	571	0	NA	NA	3034	0	NA	NA	2492	0	NA	NA	2560	0	NA	NA
exm2252911	17	26051702	rs4595846	T/G	NOS2	other	11910	0.47645	1.106	0.00025	0.55	3257	0.5009	1.129	0.023	571	0.3772	1.308	0.059	3033	0.5142	1.124	0.033	2491	0.4431	1.093	0.13	2558	0.4497	1.048	0.43
exm1507270	19	55526359	rs1654413	A/T	GP6	NS	11911	0.267206	0.887	0.00025	0.87	3262	0.428	0.85	0.0027	568	0.2868	0.924	0.62	3030	0.2157	0.92	0.22	2492	0.1866	0.834	0.018	2559	0.1813	0.97	0.69
exm-rs727957	21	35880072	rs727957	T/G	KCNE1	other/GWAS	11919	0.0801299	0.822	0.00025	0.97	3263	0.04986	0.837	0.17	571	0.05955	1.063	0.84	3033	0.0007459	1.876	0.44	2492	0.126	0.75	0.0021	2560	0.1831	0.852	0.043
exm-rs5759167	22	43500212	rs5759167	T/G	BIK	other/GWAS	11920	0.373625	0.899	0.00025	0.039	3263	0.267	0.914	0.14	571	0.5484	1.195	0.23	3034	0.3305	0.975	0.67	2492	0.404	0.868	0.016	2560	0.4958	0.829	0.0017
exm564726	6	88125542	rs61731441	A/G	C6orf165	NS	11920	0.110471	0.846	0.00026	0.51	3263	0.1214	0.908	0.23	571	0.2419	0.853	0.34	3034	0.08325	0.838	0.088	2492	0.08449	0.827	0.084	2560	0.1177	0.791	0.015
exm1261697	16	81198254	rs74029003	C/T	PKD1L2	NS	11920	0.00682571	1.688	0.00026	0.19	3263	0.02377	1.541	0.0035	571	0	NA	NA	3034	0	NA	NA	2492	0	>999.999	0.0021	2560	0.0002973	1.83	0.67
exm-rs4857855	3	128260550	rs4857855	T/C	C3orf27	other/GWAS	11919	0.211531	0.883	0.00027	0.73	3263	0.1438	0.858	0.051	571	0.2333	0.942	0.7	3034	0.2751	0.894	0.074	2492	0.2462	0.816	0.0028	2559	0.19	0.934	0.36
exm1787131	12	85623348	rs1395676	A/C	LRRIQ1	NS	11919	0.0157058	1.456	0.00028	0.66	3262	0.05429	1.42	0.00091	571	0	NA	NA	3034	0	NA	NA	2492	0.001152	3.278	0.069	2560	0.0002973	1.851	0.68
exm1616648	22	45258242	rs138849948	C/G	PRR5-ARHGAP8	NS	11919	0.000132538	10.015	0.00029	0.0086	3262	0.000466	9.108	0.0006	571	0	NA	NA	3034	0	NA	NA	2492	0	>999.999	0.29	2560	0	NA	NA
exm104817	1	154898899	rs16836525	T/C	PMVK	NS	11890	0.0585735	0.785	0.0003	0.45	3241	0.1953	0.782	0.00045	571	0.001241	<0.001	0.67	3032	0	NA	NA	2488	0.01384	0.992	0.97	2558	0.003571	<0.001	0.015
exm254330	2	196825573	rs192646926	A/G	DNAH7	NS	11920	0.000132538	10.035	0.0003	0.27	3263	0.000466	9.345	0.00054	571	0	NA	NA	3034	0	NA	NA	2492	0	NA	NA	2560	0	NA	NA
exm2266765	8	128920127	rs959409	G/A	PVT1	other/AIMS	11920	0.138966	1.176	0.00031	0.23	3263	0.3793	1.197	0.0011	571	0.03226	1.47	0.31	3034	0.09095	1.029	0.76	2492	0.02112	1.728	0.0022	2560	0.00654	0.763	0.51
exm-rs2735839	19	51364623	rs2735839	A/G	KLK3	other/GWAS	11918	0.297587	0.893	0.00031	0.054	3262	0.3013	1.087	0.14	571	0.5223	0.711	0.023	3034	0.3979	0.862	0.0086	2492	0.24	0.842	0.014	2559	0.1636	0.759	0.0013
exm293049	3	14755667	rs141714657	C/G	C3orf20	SP	11920	0.000397614	4.836	0.00032	0.057	3263	0.000699	9.454	1.6e-05	571	0	NA	NA	3034	0	NA	NA	2492	0.000384	0.81	0.88	2560	0.0005945	<0.001	0.35
exm-rs1983891	6	41536427	rs1983891	T/C	FOXP4	other/GWAS	11920	0.378595	1.107	0.00033	0.64	3263	0.4625	1.099	0.075	571	0.2097	1.023	0.89	3034	0.4078	1.087	0.13	2492	0.3756	1.13	0.039	2560	0.2794	1.116	0.088
exm708310	8	87162515	rs10094744	A/G	ATP6V0D2	NS	11920	0.0333333	0.728	0.00033	0.52	3263	0.11	0.756	0.0022	571	0.001241	<0.001	0.46	3034	0	NA	NA	2492	0.008833	0.534	0.076	2560	0.002081	0.273	0.2
exm-rs174583	11	61609750	rs174583	T/C	FADS2	other/GWAS	11920	0.418025	0.901	0.00033	0.37	3263	0.2959	0.889	0.047	571	0.6092	0.929	0.61	3034	0.4267	0.853	0.0044	2492	0.619	0.926	0.22	2560	0.3621	0.981	0.76
exm283174	2	241969887	rs185349960	A/G	SNED1	NS	11920	0.000331345	5.45	0.00035	0.72	3263	0.000466	1.991	0.49	571	0	NA	NA	3034	0.0007455	6.503	0.0014	2492	0	NA	NA	2560	0	>999.999	0.11
exm521078	6	25855404	rs116645668	A/G	SLC17A3	NS	11920	0.000463883	4.444	0.00036	0.44	3263	0.001631	4.275	0.00056	571	0	NA	NA	3034	0	NA	NA	2492	0	>999.999	0.16	2560	0	NA	NA
exm586855	6	151672914	NA	G/A	AKAP12	NS	11920	0.000265076	6.081	0.00036	0.16	3263	0.000466	6.717	0.0064	571	0	>999.999	0.1	3034	0	NA	NA	2492	0.000384	6.072	0.062	2560	0.0002973	2.072	0.6
exm506270	5	176520243	rs351855	A/G	FGFR4	NS	11915	0.329443	0.898	0.00037	0.68	3263	0.1484	1.001	0.99	571	0.4727	1.057	0.68	3030	0.4744	0.884	0.027	2491	0.3789	0.947	0.37	2560	0.3148	0.785	0.0002
exm1124969	14	95582086	rs114947750	A/C	DICER1	NS	11920	0.000994036	3.113	0.00037	0.35	3263	0.003262	3.256	0.00028	571	0	NA	NA	3034	0	NA	NA	2492	0.000384	0.987	0.99	2560	0	NA	NA
exm248478	2	179593761	rs72648951	C/T	TTN	NS	11920	0.0074884	1.649	0.00038	0.98	3263	0.02423	1.718	0.00021	571	0.001241	2.27	0.57	3034	0	NA	NA	2492	0.002688	0.672	0.51	2560	0.0002973	1.614	0.74
exm1125812	14	96781800	NA	C/T	ATG2B	NS	11920	0	>999.999	0.00038	0.76	3263	0	>999.999	0.14	571	0	>999.999	0.2	3034	0	NA	NA	2492	0	NA	NA	2560	0	>999.999	0.01
exm1207133	16	2296877	rs141206306	T/C	ECI1	NS	11920	0.00271703	2.117	0.00039	0.83	3263	0.00233	1.633	0.3	571	0	>999.999	0.03	3034	0.0002485	<0.001	0.45	2492	0.002688	1.192	0.74	2560	0.006837	2.623	0.00035
exm1412000	19	5687901	NA	C/G	HSD11B1L	NS	11864	0.000932215	3.131	0.00041	0.45	3241	0.003285	1.997	0.06	568	0	>999.999	0.15	3018	0	>999.999	0.087	2479	0	>999.999	0.0051	2558	0	>999.999	0.14
exm150017	1	220180562	rs148551457	C/T	EPRS,RNU5F-1	other	11910	6.63218e-05	16.515	0.00042	0.25	3261	0.000233	14.637	0.00098	571	0	NA	NA	3029	0	NA	NA	2491	0	NA	NA	2558	0	NA	NA
exm854616	10	106025864	rs116993524	T/C	GSTO1	NS	11920	0.000795229	3.397	0.00042	0.61	3263	0.000932	2.055	0.3	571	0	NA	NA	3034	0	NA	NA	2492	0	>999.999	0.011	2560	0.002378	2.995	0.012
exm1123817	14	94545604	rs148489393	T/C	DDX24	NS	11920	0.00662691	0.458	0.00042	0.37	3263	0.02213	0.485	0.0012	571	0	NA	NA	3034	0	NA	NA	2492	0.001536	<0.001	0.051	2560	0.0002973	<0.001	0.5
exm1594390	22	24717850	rs204710	A/G	SPECC1L	other	11919	6.62778e-05	16.088	0.00042	0.24	3263	0	NA	NA	571	0	NA	NA	3034	0.0002485	16.111	0.00044	2491	0	NA	NA	2560	0	NA	NA
exm1594455	22	24761467	rs204718	G/A	SPECC1L	NS	11920	6.62691e-05	16.088	0.00042	0.24	3263	0	NA	NA	571	0	NA	NA	3034	0.0002485	16.111	0.00044	2492	0	NA	NA	2560	0	NA	NA
exm2266384	7	25563961	rs11975146	A/G	NPVF	other	11920	0.474751	0.909	0.00044	0.55	3263	0.5408	0.865	0.0054	571	0.3921	0.635	0.0031	3034	0.4953	0.922	0.14	2492	0.3975	0.894	0.056	2560	0.4456	0.992	0.9
exm1413308	19	6147676	rs74980839	A/C	ACSBG2	NS	11920	0.00616302	1.716	0.00044	0.5	3263	0.02074	1.741	0.00039	571	0	NA	NA	3034	0	NA	NA	2492	0.001536	0.858	0.84	2560	0	NA	NA
exm621671	7	51096992	rs61737866	A/G	COBL	NS	11918	0.0248575	0.701	0.00045	0.64	3261	0.08256	0.684	0.00037	571	0	>999.999	0.15	3034	0	NA	NA	2492	0.006528	0.977	0.95	2560	0.001189	0.492	0.53
S3.2 African Americans
							Overall					African American				Native Hawaiian				Japanese American				Latino				European American
SNP	Chr	Position	SNP ID	A1/A2	Gene	Type	No. of samples	MAF	OR	P	P_Het	No. of samples	MAF	OR	P	No. of samples	MAF	OR	P	No. of samples	MAF	OR	P	No. of samples	MAF	OR	P	No. of samples	MAF	OR	P
exm-rs16901979	8	128124916	rs16901979	A/C	PCAT1	other/GWAS	11920	0.177999	1.473	6.2e-25	0.7	3263	0.3847	1.36	1.1e-08	571	0.1216	2.386	4.9e-07	3034	0.1774	1.516	4.1e-10	2492	0.03533	1.767	5.4e-05	2560	0.03894	1.303	0.065
exm1527971	20	19951534	rs3803981	A/T	RIN2	NS	11919	0.166137	1.068	0.066	0.087	3262	0.1382	1.366	1e-05	571	0.2444	0.934	0.66	3034	0.1973	0.988	0.86	2492	0.1502	1.015	0.85	2560	0.1581	0.963	0.64
exm293049	3	14755667	rs141714657	C/G	C3orf20	SP	11920	0.000397614	4.836	0.00032	0.057	3263	0.000699	9.454	1.6e-05	571	0	NA	NA	3034	0	NA	NA	2492	0.000384	0.81	0.88	2560	0.0005945	<0.001	0.35
exm199465	2	70052624	rs146778617	T/G	ANXA4	NS	11920	0.00072896	4.523	6e-06	0.46	3263	0.002563	4.239	1.8e-05	571	0	NA	NA	3034	0	NA	NA	2492	0	>999.999	0.32	2560	0	NA	NA
exm1173904	15	72057477	rs148016609	A/G	THSD4	NS	11920	0.00198807	1.569	0.096	0.61	3263	0.000466	12.652	3.1e-05	571	0.002481	<0.001	0.48	3034	0	NA	NA	2492	0.00192	1.305	0.68	2560	0.006243	0.884	0.75
exm121964	1	169519112	rs6020	T/C	F5	NS	11919	0.301166	0.894	0.002	0.64	3263	0.2812	0.78	4.7e-05	571	0.469	0.81	0.17	3033	0.6527	1	0.99	2492	0.09793	0.968	0.75	2560	0.02348	0.829	0.42
exm68152	1	70896038	rs145785987	C/T	CTH	NS	11920	0.000198807	9.011	3.1e-05	0.76	3263	0.000699	8.561	6e-05	571	0	NA	NA	3034	0	NA	NA	2492	0	NA	NA	2560	0	>999.999	0.18
exm-rs339331	6	117210052	rs339331	C/T	RFX6	other/GWAS	11920	0.296554	0.879	2.1e-05	0.66	3263	0.2519	0.776	6e-05	571	0.2643	0.952	0.75	3034	0.3688	0.898	0.057	2492	0.2803	0.924	0.22	2560	0.2875	0.906	0.13
exm-rs17645023	17	64917033	rs17645023	T/A	CACNG5	other/GWAS	11896	0.228183	1.053	0.11	0.056	3263	0.2006	1.29	6.7e-05	571	0.1526	1.198	0.33	3010	0.2504	0.933	0.28	2492	0.2704	0.937	0.33	2560	0.2224	1.067	0.35
exm574153	6	117130704	rs2274911	G/A	GPRC6A	NS	11920	0.300199	0.875	1.3e-05	0.76	3263	0.2379	0.776	8.7e-05	571	0.2717	0.896	0.48	3034	0.4332	0.908	0.081	2492	0.2657	0.945	0.38	2560	0.2542	0.857	0.027
exm574134	6	117128107	rs140603319	G/A	GPRC6A	NS	11918	0.000464006	3.979	0.0014	0.66	3262	0.0002331	18.952	9.5e-05	571	0	NA	NA	3034	0.001491	1.487	0.54	2491	0	NA	NA	2560	0	NA	NA
exm270363	2	223085955	rs2234675	T/G	PAX3	NS	11920	0.0143804	0.947	0.64	0.14	3263	0.005359	2.814	0.0001	571	0.01241	1.407	0.53	3034	0.000497	0.918	0.95	2492	0.01767	0.813	0.38	2560	0.04043	0.646	0.012
exm969917	11	129739816	NA	A/G	NFRKB	NS	11920	6.62691e-05	19.333	8e-05	0.91	3263	0.000233	18.724	0.00011	571	0	NA	NA	3034	0	NA	NA	2492	0	NA	NA	2560	0	NA	NA
exm1474666	19	43414890	rs116433230	A/C	PSG6	NS	11920	0.00377734	0.223	4.3e-05	0.37	3263	0.01235	0.243	0.00014	571	0	NA	NA	3034	0	NA	NA	2492	0.001536	<0.001	0.091	2560	0	NA	NA
exm2269432	3	35536237	rs7650296	C/T	ARPP21	other	11920	0.462624	0.92	0.0029	0.36	3263	0.6384	0.815	0.00016	571	0.2357	1.403	0.036	3034	0.3415	0.894	0.057	2492	0.4681	0.988	0.83	2560	0.4334	0.948	0.37
exm794246	9	136599026	rs147006467	G/C	SARDH	NS	11919	0.000662691	3.946	0.00015	0.43	3263	0.00233	3.904	0.00016	570	0	NA	NA	3034	0	NA	NA	2492	0	NA	NA	2560	0	NA	NA
exm882733	11	5411122	rs114517600	T/C	OR51M1	NS	11920	0.0104705	1.58	0.0002	0.49	3263	0.03495	1.611	0.00016	571	0.001241	<0.001	0.79	3034	0	NA	NA	2492	0.002304	0.861	0.81	2560	0.0002973	4.359	0.2
exm2257520	6	129980436	rs6569617	C/T	ARHGAP18	other	11918	0.440872	1.041	0.15	0.8	3263	0.5268	1.22	0.0002	571	0.469	0.884	0.37	3032	0.3418	0.958	0.46	2492	0.4439	0.918	0.14	2560	0.4405	1.08	0.19
exm248478	2	179593761	rs72648951	C/T	TTN	NS	11920	0.0074884	1.649	0.00038	0.98	3263	0.02423	1.718	0.00021	571	0.001241	2.27	0.57	3034	0	NA	NA	2492	0.002688	0.672	0.51	2560	0.0002973	1.614	0.74
exm1525601	20	11900442	rs141676257	A/G	BTBD3	NS	11920	0.0010603	1.371	0.4	0.68	3263	0	>999.999	0.00021	571	0	NA	NA	3034	0	NA	NA	2492	0.001536	0.478	0.39	2560	0.003567	0.757	0.6
exm240523	2	170139387	rs111704488	C/A	LRP2	NS	11920	0.0072896	1.628	0.00071	0.9	3263	0.0233	1.734	0.00022	571	0.002481	<0.001	0.33	3034	0	NA	NA	2492	0.002688	0.865	0.81	2560	0.0002973	1.185	0.91
exm1105396	14	60591199	rs3742642	T/A	C14orf135	NS	11920	0.0657389	1.044	0.48	0.11	3263	0.02237	1.752	0.00023	571	0.1439	1.083	0.7	3034	0.1911	0.924	0.28	2492	0.002688	1.038	0.94	2560	0.001189	3.368	0.031
exm1508922	19	55897956	rs147614077	A/G	RPL28	NS	11920	0.000198807	7.824	0.00018	0.00046	3263	0.000699	7.605	0.00023	571	0	NA	NA	3034	0	NA	NA	2492	0	NA	NA	2560	0	NA	NA
exm728655	8	144942477	rs138137510	T/C	EPPK1	NS	11919	0.000795229	2.898	0.0028	0.11	3263	0.001864	4.242	0.00024	571	0.001241	<0.001	0.63	3033	0.0002485	1.4	0.81	2492	0.000768	<0.001	0.28	2560	0	NA	NA
exm1076118	13	99449717	rs2282133	T/C	DOCK9	NS	11920	0.0385686	1.016	0.83	0.18	3263	0.000233	17.292	0.00024	571	0.01985	0.918	0.86	3034	0.1106	1.012	0.89	2492	0.04186	0.907	0.52	2560	0.00327	0.76	0.64
exm41357	1	33292008	rs61739743	A/G	S100PBP	NS	11920	0.00775348	1.303	0.064	0.98	3263	0.01212	2.048	0.00025	571	0.003722	<0.001	0.15	3034	0	NA	NA	2492	0.009985	0.842	0.57	2560	0.0107	0.86	0.61
exm183836	2	29497967	rs35228363	A/G	ALK	NS	11920	0.0101392	1.206	0.15	0.098	3263	0.003961	3.104	0.00025	571	0.006203	2.065	0.31	3034	0	NA	NA	2492	0.01382	1.211	0.43	2560	0.02824	0.854	0.4
exm1437477	19	15483942	rs61757556	T/C	AKAP8	NS	11920	0.00145792	1.706	0.066	0.99	3263	0.000932	6.33	0.00025	571	0	>999.999	0.16	3034	0	NA	NA	2492	0.005376	0.741	0.46	2560	0.001189	0.915	0.92
exm1507288	19	55527081	rs2304167	C/T	GP6	NS	11919	0.280716	0.879	7e-05	0.87	3263	0.4653	0.82	0.00026	571	0.2903	0.938	0.68	3034	0.2239	0.937	0.33	2492	0.1889	0.836	0.019	2559	0.1819	0.962	0.62
exm67632	1	68905294	rs114379164	C/G	RPE65	NS	11916	0.000928136	3.304	0.00021	0.36	3262	0.003263	3.251	0.00028	571	0	NA	NA	3034	0	NA	NA	2490	0	NA	NA	2559	0	>999.999	0.18
exm1124969	14	95582086	rs114947750	A/C	DICER1	NS	11920	0.000994036	3.113	0.00037	0.35	3263	0.003262	3.256	0.00028	571	0	NA	NA	3034	0	NA	NA	2492	0.000384	0.987	0.99	2560	0	NA	NA
exm2272456	16	84020685	rs68004739	T/G	NECAB2	other/AIMS	11920	0.293704	1.104	0.0092	0.67	3263	0.7069	1.258	0.00028	571	0.1526	1.02	0.92	3034	0.1151	1.209	0.023	2492	0.139	0.952	0.56	2560	0.1338	0.912	0.3
exm90616	1	144931387	rs61805374	G/T	PDE4DIP	NS	11919	0.002386	1.738	0.02	0.1	3263	0.000699	7.56	0.00031	571	0.002481	<0.001	0.44	3034	0	NA	NA	2492	0.002304	1.981	0.18	2559	0.007436	1.08	0.82
exm847519	10	100017453	rs1983864	G/T	LOXL4	NS	11918	0.35346	0.987	0.66	0.59	3263	0.13	0.731	0.00032	571	0.4082	1.31	0.052	3034	0.4804	1.065	0.25	2491	0.5061	1.02	0.73	2559	0.3554	0.957	0.48
exm2271790	12	107563247	rs4964527	T/C	CRY1	other	11919	0.500331	0.952	0.077	0.78	3263	0.3938	0.821	0.00033	571	0.3958	0.839	0.23	3033	0.6385	1.018	0.75	2492	0.4785	1.057	0.34	2560	0.5131	0.953	0.41
exm289371	3	10084828	rs35625434	A/G	FANCD2	NS	11920	0.00543406	1.122	0.5	0.72	3263	0	>999.999	0.00036	571	0.002481	<0.001	0.34	3034	0.00994	0.997	0.99	2492	0.01421	1.01	0.97	2560	0.0008918	0.606	0.67
exm621671	7	51096992	rs61737866	A/G	COBL	NS	11918	0.0248575	0.701	0.00045	0.64	3261	0.08256	0.684	0.00037	571	0	>999.999	0.15	3034	0	NA	NA	2492	0.006528	0.977	0.95	2560	0.001189	0.492	0.53
exm626925	7	73971995	rs149209759	G/A	GTF2IRD1	NS	11920	0.000795229	1.871	0.12	0.69	3263	0	>999.999	0.00037	571	0.001241	<0.001	0.59	3034	0	NA	NA	2492	0.00192	0.713	0.65	2560	0.001784	1.305	0.68
exm-rs7210100	17	47436749	rs7210100	A/G	ZNF652	other/GWAS	11920	0.0138502	1.472	0.00046	0.23	3263	0.0466	1.493	0.00037	571	0.001241	<0.001	0.58	3034	0	NA	NA	2492	0.003072	0.616	0.4	2560	0	>999.999	0.15
exm1250493	16	67919696	rs139776238	A/G	NRN1L	other	11920	0	>999.999	0.00024	0.81	3263	0	>999.999	0.00039	571	0	NA	NA	3034	0	NA	NA	2492	0	NA	NA	2560	0	NA	NA
exm1413308	19	6147676	rs74980839	A/C	ACSBG2	NS	11920	0.00616302	1.716	0.00044	0.5	3263	0.02074	1.741	0.00039	571	0	NA	NA	3034	0	NA	NA	2492	0.001536	0.858	0.84	2560	0	NA	NA
exm1443876	19	18054132	rs8104153	C/G	CCDC124	NS	11920	0.023393	0.698	0.00054	0.63	3263	0.08085	0.688	0.00039	571	0	NA	NA	3034	0	NA	NA	2492	0.00192	0.891	0.86	2560	0.0002973	1.6	0.74
exm164145	1	242159566	rs112610111	T/C	MAP1LC3C	NS	11920	0.000132538	7.189	0.004	0.83	3263	0.000233	16.394	0.00041	571	0	NA	NA	3034	0	NA	NA	2492	0.000384	<0.001	0.33	2560	0	NA	NA
exm579601	6	133105120	rs6926101	T/C	C6orf192	NS	11919	0.150716	1.184	0.00012	0.41	3263	0.4252	1.211	0.00042	571	0.03722	1.643	0.094	3033	0.02387	1.115	0.53	2492	0.05146	1.147	0.27	2560	0.05618	1.012	0.92
exm2260608	16	87394386	rs1834022	A/G	FBXO31	other/AIMS	11920	0.193042	1.18	0.00094	0.63	3263	0.6156	1.23	0.00044	571	0.02605	1.134	0.79	3034	0.000497	<0.001	0.21	2492	0.05952	1.012	0.92	2560	0.02765	1.211	0.28
exm1311040	17	32688826	rs138527286	C/T	CCL1	NS	11920	0.00304838	2.153	0.00016	0.44	3263	0.01072	2.063	0.00044	571	0	NA	NA	3034	0	NA	NA	2492	0	>999.999	0.093	2560	0	NA	NA
exm104817	1	154898899	rs16836525	T/C	PMVK	NS	11890	0.0585735	0.785	0.0003	0.45	3241	0.1953	0.782	0.00045	571	0.001241	<0.001	0.67	3032	0	NA	NA	2488	0.01384	0.992	0.97	2558	0.003571	<0.001	0.015
exm222061	2	113819725	rs28938777	G/A	IL36RN	NS	11920	0.00656064	1.253	0.16	0.048	3263	0	>999.999	0.00046	571	0.009926	1.071	0.92	3034	0.02212	1.087	0.64	2492	0	>999.999	0.048	2560	0.0005945	1.044	0.97
exm2271442	10	131200443	rs2792980	T/C	MGMT	other/AIMS	11918	0.302996	1.003	0.92	0.32	3263	0.6699	1.235	0.00047	570	0.2438	0.864	0.39	3033	0.1328	0.887	0.15	2492	0.1932	0.947	0.46	2560	0.1376	0.815	0.024
exm2272422	16	16018589	rs13335375	T/C	ABCC1	other/AIMS	11920	0.244135	1.13	0.003	0.073	3263	0.6507	1.232	0.0005	571	0.05335	0.793	0.48	3034	0.06362	1.107	0.35	2492	0.1087	0.956	0.63	2560	0.09185	1.087	0.42
exm1286004	17	7128292	rs148584617	A/G	ACADVL	NS	11917	0.001193	1.453	0.27	0.41	3263	0	>999.999	0.0005	571	0.001241	<0.001	0.077	3033	0	NA	NA	2492	0.002688	0.866	0.8	2558	0.002973	0.927	0.89
exm2254329	20	51722623	rs2800999	G/T	TSHZ2	other	11916	0.50179	0.98	0.46	0.1	3263	0.4839	0.831	0.0005	571	0.3524	1.345	0.04	3034	0.4998	0.989	0.84	2492	0.4378	1.136	0.031	2556	0.6125	0.982	0.77
exm-rs2043085	15	58680954	rs2043085	A/G	LIPC	other/GWAS	11918	0.509612	0.971	0.29	0.75	3263	0.6205	0.828	0.00051	570	0.4353	1.004	0.98	3033	0.6084	1.061	0.3	2492	0.3667	1.038	0.53	2560	0.3784	0.994	0.92
exm709373	8	92008044	rs73694351	A/C	TMEM55A	NS	11920	0.000397614	4.229	0.0018	0.73	3263	0.001165	5.182	0.00053	571	0	NA	NA	3034	0	NA	NA	2492	0.000384	<0.001	0.19	2560	0	NA	NA
exm254330	2	196825573	rs192646926	A/G	DNAH7	NS	11920	0.000132538	10.035	0.0003	0.27	3263	0.000466	9.345	0.00054	571	0	NA	NA	3034	0	NA	NA	2492	0	NA	NA	2560	0	NA	NA
exm387516	4	7435721	rs6850206	T/C	PSAPL1	NS	11914	0.116364	0.943	0.18	0.35	3262	0.1438	0.759	0.00054	571	0.07072	0.69	0.22	3029	0.02962	1.173	0.31	2492	0.134	0.987	0.88	2560	0.1822	1.084	0.29
exm413802	4	90856383	rs146236543	A/G	MMRN1	NS	11920	0.000795229	3.212	0.00081	0.88	3263	0.002563	3.44	0.00054	571	0	>999.999	0.043	3034	0	NA	NA	2492	0.000384	<0.001	0.32	2560	0	NA	NA
exm1021287	12	70949014	rs61758735	A/G	PTPRB	NS	11920	0.00550033	0.639	0.029	0.24	3263	0.000466	9.329	0.00054	571	0.006203	<0.001	0.24	3034	0	>999.999	0.37	2492	0.01382	0.415	0.005	2560	0.01189	0.54	0.069
exm521078	6	25855404	rs116645668	A/G	SLC17A3	NS	11920	0.000463883	4.444	0.00036	0.44	3263	0.001631	4.275	0.00056	571	0	NA	NA	3034	0	NA	NA	2492	0	>999.999	0.16	2560	0	NA	NA
exm1558338	20	61910270	rs2273499	A/G	ARFGAP1	NS	11920	0.00304838	1.205	0.4	0.78	3263	0	>999.999	0.00056	571	0	NA	NA	3034	0.001243	2.009	0.27	2492	0.01421	0.94	0.81	2560	0.001189	1.046	0.96
exm1264397	16	84270476	rs11646443	A/G	KCNG4	NS	11918	0.228297	1.098	0.0041	0.92	3262	0.2453	1.224	0.00057	571	0.2816	0.98	0.9	3034	0.07207	1.166	0.13	2491	0.2869	1.078	0.23	2560	0.3353	0.98	0.75
exm907554	11	55322500	rs141941152	T/C	OR4C15	NS	11920	0.00139165	1.627	0.11	0.3	3263	0.000233	15.883	0.0006	571	0	>999.999	0.18	3034	0	NA	NA	2492	0.003072	1.042	0.93	2560	0.003567	0.935	0.89
exm1616648	22	45258242	rs138849948	C/G	PRR5-ARHGAP8	NS	11919	0.000132538	10.015	0.00029	0.0086	3262	0.000466	9.108	0.0006	571	0	NA	NA	3034	0	NA	NA	2492	0	>999.999	0.29	2560	0	NA	NA
exm-rs6867265	5	130413981	rs6867265	G/A	HINT1	other/GWAS	11918	0.16565	0.9	0.014	0.48	3262	0.4366	0.827	0.00062	571	0.02357	1.447	0.36	3034	0.01665	0.983	0.94	2491	0.09301	0.895	0.27	2560	0.08859	1.151	0.18
exm1490685	19	49954807	rs2293012	T/G	PIH1D1	NS	11920	0.424983	0.957	0.14	0.25	3263	0.3751	0.828	0.00064	571	0.4504	1.213	0.18	3034	0.6923	0.939	0.29	2492	0.3379	1.05	0.43	2560	0.2301	1.028	0.69
exm703961	8	67505363	rs141575513	T/A	MYBL1	NS	11920	0.000662691	3.335	0.0016	0.88	3263	0.001864	3.989	0.00065	571	0	NA	NA	3034	0	NA	NA	2492	0.000384	<0.001	0.31	2560	0.0002973	2.058	0.61
exm19603	1	15871023	rs78309148	A/G	DNAJC16	NS	11920	0.000795229	2.675	0.0078	0.93	3263	0.001864	3.958	0.00067	571	0.001241	<0.001	0.58	3034	0	NA	NA	2492	0.000384	0.643	0.76	2560	0.0005945	<0.001	0.35
exm122981	1	170965700	rs139086068	A/G	C1orf129	NS	11920	0.00139165	2.403	0.0023	0.028	3263	0.004427	2.7	0.00067	571	0	NA	NA	3034	0	NA	NA	2492	0.000768	<0.001	0.17	2560	0	NA	NA
exm632250	7	87911975	NA	T/C	STEAP4	NS	11920	0.000861498	3.015	0.0011	0.58	3263	0.002796	3.225	0.00068	571	0	NA	NA	3034	0	NA	NA	2492	0.000384	<0.001	0.32	2560	0	NA	NA
exm-rs286913	11	34655363	rs286913	T/C	EHF	other/GWAS	11920	0.0577866	1.189	0.0022	0.42	3263	0.06104	1.407	0.00068	571	0.1216	1.001	1	3034	0.05691	1.214	0.082	2492	0.04071	0.873	0.36	2560	0.05262	1.171	0.21
exm283584	2	242065754	rs141663644	T/C	PASK	NS	11918	0.000331345	5.197	0.00048	0.55	3262	0.001165	4.98	0.00069	571	0	NA	NA	3034	0	NA	NA	2491	0	NA	NA	2560	0	NA	NA
exm495706	5	149900889	rs145198292	G/A	NDST1	NS	11920	0.000861498	3.065	0.001	0.56	3263	0.002563	3.364	0.00071	571	0	NA	NA	3034	0	NA	NA	2492	0.000384	<0.001	0.34	2560	0.0002973	1.771	0.68
exm998186	12	48538908	rs41291971	A/G	PFKM	NS	11920	0.00603048	1.072	0.68	0.65	3263	0.001398	4.632	0.00073	571	0.01117	0.241	0.15	3034	0.0002485	3.716	0.26	2492	0.008833	1.015	0.96	2560	0.01546	0.809	0.4
exm1114318	14	74535660	rs139579994	A/G	ALDH6A1	NS	11920	0.00178926	1.371	0.29	0.64	3263	0.000233	15.319	0.00073	571	0	>999.999	0.087	3034	0	NA	NA	2492	0.000384	2.712	0.37	2560	0.007432	0.615	0.23
exm1187389	15	89837098	rs150544323	G/A	FANCI	NS	11920	0.000132538	9.254	0.0006	0.31	3263	0.000466	9.056	0.00073	571	0	NA	NA	3034	0	NA	NA	2492	0	NA	NA	2560	0	NA	NA
exm397536	4	47427873	rs41311286	G/C	GABRB1	NS	11920	0.00145792	1.46	0.24	0.032	3263	0	>999.999	0.00077	571	0.004963	<0.001	0.19	3034	0	NA	NA	2492	0.001152	2.614	0.15	2560	0.004459	0.763	0.58
exm940835	11	74168361	rs17215437	T/C	KCNE3	NS	11920	0.00165673	0.83	0.6	0.62	3263	0	>999.999	0.00077	571	0.001241	1.673	0.72	3034	0	NA	NA	2492	0.001536	0.8	0.77	2560	0.005945	0.291	0.034
exm1272378	16	89986117	rs1805007	T/C	MC1R	NS	11919	0.0262425	0.965	0.69	0.78	3263	0.02493	0.483	0.00078	571	0.02357	1.464	0.38	3033	0.002982	0.358	0.13	2492	0.01152	1.454	0.12	2560	0.06778	1.103	0.39
exm1605181	22	37396024	rs146129761	C/G	C22orf33	SP	11920	0.00298211	1.933	0.0017	0.95	3263	0.009786	2.056	0.0008	571	0.001241	<0.001	0.51	3034	0	NA	NA	2492	0.000768	1.101	0.92	2560	0	NA	NA
exm1626423	23	3228966	rs148675322	G/C	MXRA5	NS	8351	0.00402313	1.328	0.066	0.85	2224	0	>999.999	0.0008	335	0.005988	0.002	0.49	2079	0	NA	NA	1967	0.002574	1.371	0.44	1746	0.01498	0.968	0.87
exm1361081	17	76497940	rs139273056	T/C	DNAH17	NS	11920	0.000596421	3.597	0.001	0.11	3263	0.001864	3.879	0.00083	571	0	NA	NA	3034	0	NA	NA	2492	0.000384	1.774	0.69	2560	0	NA	NA
exm1065740	13	42259195	rs78161810	G/T	KIAA0564	NS	11920	0.0105368	1.457	0.0023	0.16	3263	0.02842	1.595	0.00084	571	0.001241	3.995	0.33	3034	0	>999.999	0.18	2492	0.006528	0.968	0.93	2560	0.005648	1.006	0.99
exm582914	6	143074549	rs117019703	A/G	HIVEP2	NS	11920	0.00132538	1.277	0.48	0.85	3263	0	>999.999	0.00086	571	0.003722	0.235	0.19	3034	0	NA	NA	2492	0.001536	1.016	0.98	2560	0.003864	0.764	0.61
exm301851	3	39118649	rs144954527	T/C	WDR48	NS	11916	0	>999.999	0.001	0.42	3262	0	>999.999	0.00087	571	0	NA	NA	3031	0	NA	NA	2492	0	NA	NA	2560	0	NA	NA
exm681261	8	10466933	NA	T/C	RP1L1	NS	11920	0.000795229	3.245	0.00081	0.38	3263	0.002796	3.209	0.00087	571	0	NA	NA	3034	0	NA	NA	2492	0	NA	NA	2560	0	NA	NA
exm887134	11	6898587	rs112511001	A/C	OR10A4	NS	11911	0.000928259	2.878	0.0016	0.76	3255	0.002566	3.323	0.00087	571	0	NA	NA	3033	0	NA	NA	2492	0.000384	2.531	0.44	2560	0.0005945	<0.001	0.3
exm940369	11	73753106	rs142277857	G/A	C2CD3	NS	11920	0.000994036	2.404	0.012	0.92	3263	0	>999.999	0.00087	571	0.002481	<0.001	0.35	3034	0	NA	NA	2492	0.000768	0.667	0.74	2560	0.00327	2.027	0.094
exm1423104	19	9578028	rs141562027	T/C	ZNF560	NS	11920	0	>999.999	0.00051	0.65	3263	0	>999.999	0.00088	571	0	NA	NA	3034	0	NA	NA	2492	0	>999.999	0.34	2560	0	>999.999	0.2
exm2250844	1	228660501	rs10733022	C/A	MIR4666A	other	11920	0.495295	1.061	0.039	0.73	3263	0.3884	1.192	0.00089	571	0.4305	1.155	0.29	3034	0.7729	1.011	0.86	2492	0.4497	0.994	0.91	2560	0.3505	1.007	0.91
exm417763	4	108853107	rs147506864	T/C	CYP2U1	NS	11919	0.000927767	1.519	0.27	0.51	3263	0	>999.999	0.00091	571	0.001241	<0.001	0.62	3033	0	NA	NA	2492	0.00384	0.755	0.59	2560	0.0008918	2.033	0.38
exm829805	10	70863698	rs146830092	T/C	SRGN	NS	11920	0.00159046	2.648	0.00021	0.19	3263	0.005592	2.422	0.00091	571	0	NA	NA	3034	0	NA	NA	2492	0	>999.999	0.081	2560	0	NA	NA
exm887143	11	6898714	rs112941004	A/C	OR10A4	NS	11920	0.000927767	2.867	0.0016	0.76	3263	0.002563	3.307	0.00091	571	0	NA	NA	3034	0	NA	NA	2492	0.000384	2.531	0.44	2560	0.0005945	<0.001	0.3
exm887165	11	6913073	rs113406411	T/C	OR2D2	NS	11919	0.00092789	2.868	0.0016	0.76	3263	0.002563	3.307	0.00091	571	0	NA	NA	3034	0	NA	NA	2491	0.0003843	2.531	0.44	2560	0.0005945	<0.001	0.3
exm1787131	12	85623348	rs1395676	A/C	LRRIQ1	NS	11919	0.0157058	1.456	0.00028	0.66	3262	0.05429	1.42	0.00091	571	0	NA	NA	3034	0	NA	NA	2492	0.001152	3.278	0.069	2560	0.0002973	1.851	0.68
exm710089	8	95183191	rs111589116	A/G	CDH17	NS	11920	0.00185553	0.132	0.0012	0.084	3263	0.006524	0.128	0.00093	571	0	NA	NA	3034	0	NA	NA	2492	0	NA	NA	2560	0	NA	NA
exm894449	11	18303533	rs61884288	A/G	HPS5	NS	11920	0.0131213	1.337	0.0081	0.75	3263	0.007689	2.202	0.00093	571	0.01117	0.604	0.44	3034	0.0002485	1.574	0.77	2492	0.0192	1.008	0.97	2560	0.03121	1.272	0.12
exm252304	2	189940142	rs76148000	G/T	COL5A2	NS	11920	0.0105368	1.253	0.073	0.41	3263	0.005126	2.563	0.00095	571	0.008685	1.129	0.87	3034	0	NA	NA	2492	0.01421	1.014	0.95	2560	0.02765	1.095	0.61
exm1132187	14	105406024	rs56898675	C/G	AHNAK2	NS	11920	0.00198807	2.247	0.00093	0.6	3263	0.006524	2.3	0.00096	571	0	NA	NA	3034	0	NA	NA	2492	0.000384	1.04	0.97	2560	0.0002973	2.08	0.62
exm1611531	22	41257393	rs61756762	A/C	DNAJB7	NS	11920	0.00490391	1.56	0.01	0.54	3263	0.002563	3.387	0.00096	571	0.002481	<0.001	0.48	3034	0	>999.999	0.37	2492	0.004992	1.652	0.17	2560	0.01427	1.175	0.5
exm1214279	16	4790204	rs61731839	G/C	C16orf71	NS	11920	0.0152419	1.198	0.084	0.11	3263	0.008155	2.189	0.00097	571	0.01241	0.736	0.66	3034	0.000497	<0.001	0.26	2492	0.02266	1.161	0.43	2560	0.03686	1.004	0.98
S3.3 European Americans
							Overall					African American				Native Hawaiian				Japanese American				Latino				European American
SNP	Chr	Position	SNP ID	A1/A2	Gene	Type	No. of samples	MAF	OR	P	P_Het	No. of samples	MAF	OR	P	No. of samples	MAF	OR	P	No. of samples	MAF	OR	P	No. of samples	MAF	OR	P	No. of samples	MAF	OR	P
exm-rs1016343	8	128093297	rs1016343	T/C	PCAT1	other/GWAS	11916	0.203925	1.297	1.5e-15	0.85	3261	0.2114	1.057	0.38	571	0.1501	1.353	0.098	3033	0.2631	1.459	1.1e-10	2491	0.138	1.141	0.11	2560	0.1876	1.535	1.2e-09
exm-rs11228565	11	68978580	rs11228565	A/G	MYEOV	other/GWAS	11920	0.120742	1.177	9.6e-05	0.99	3263	0.1102	0.879	0.15	571	0.1638	1.37	0.076	3034	0.03653	1.102	0.48	2492	0.1321	1.186	0.04	2560	0.2158	1.386	2.9e-06
exm-rs1456315	8	128103937	rs1456315	G/A	PCAT1	other/GWAS	11920	0.498343	0.762	8.6e-22	0.3	3263	0.4811	0.866	0.007	571	0.5161	0.586	0.00016	3034	0.341	0.613	4.4e-15	2492	0.5246	0.835	0.0017	2560	0.684	0.764	1.3e-05
exm599346	7	2289636	rs35932242	T/C	NUDT1	SP	11907	0.00696379	1.293	0.092	0.44	3260	0.01586	0.729	0.17	571	0.001241	3.795	0.33	3027	0	>999.999	0.051	2490	0.006149	1.012	0.97	2559	0.005949	3.238	1.7e-05
exm-rs7130881	11	68995958	rs7130881	G/A	MYEOV	other/GWAS	11920	0.107422	1.26	9.4e-08	0.67	3263	0.1584	1.208	0.0065	571	0.05707	1.182	0.57	3034	0.004473	1.654	0.16	2492	0.111	1.162	0.094	2560	0.1748	1.352	5.1e-05
exm-rs9367532	6	53310839	rs9367532	A/G	GCLC	other/AIMS	11919	0.320875	0.963	0.26	0.5	3263	0.124	0.954	0.56	571	0.4677	0.838	0.21	3034	0.6364	1.044	0.45	2491	0.3506	1.065	0.33	2560	0.1364	0.681	8.1e-05
exm-rs12055786	6	153431125	rs12055786	C/T	RGS17	other/GWAS	11847	0.449027	1.075	0.012	0.82	3254	0.5035	1.025	0.63	571	0.4293	1.177	0.27	2980	0.2186	1.061	0.38	2482	0.5726	0.997	0.96	2560	0.5612	1.268	8.9e-05
exm389467	4	9943624	rs149454410	T/C	SLC2A9	NS	11920	0.000132538	7.395	0.0028	0.29	3263	0.000466	<0.001	0.25	571	0	NA	NA	3034	0	NA	NA	2492	0	>999.999	0.21	2560	0	>999.999	0.00014
exm1333807	17	46847364	rs2032844	A/C	TTLL6	NS	11920	0.249768	1.017	0.6	0.62	3263	0.2628	0.911	0.13	571	0.1774	0.868	0.45	3034	0.1727	0.982	0.81	2492	0.3767	0.97	0.6	2560	0.2444	1.283	0.00018
exm1334819	17	48068913	rs151180891	T/C	DLX3	NS	11920	0.000397614	3.047	0.026	0.37	3263	0.001165	0.392	0.38	571	0	NA	NA	3034	0	NA	NA	2492	0.000384	2.091	0.55	2560	0	>999.999	0.00019
exm1574340	21	44270229	rs6586250	T/C	WDR4	NS	11920	0.228098	0.977	0.51	0.95	3263	0.4245	1.032	0.56	571	0.08933	0.776	0.34	3034	0.1205	1.108	0.21	2492	0.1536	1.059	0.48	2560	0.1971	0.745	0.00019
exm506270	5	176520243	rs351855	A/G	FGFR4	NS	11915	0.329443	0.898	0.00037	0.68	3263	0.1484	1.001	0.99	571	0.4727	1.057	0.68	3030	0.4744	0.884	0.027	2491	0.3789	0.947	0.37	2560	0.3148	0.785	0.0002
exm-rs445114	8	128323181	rs445114	C/T	POU5F1B	other/GWAS	11920	0.490126	0.869	5.9e-07	0.61	3263	0.6475	0.935	0.23	571	0.361	0.748	0.055	3034	0.4814	0.873	0.013	2492	0.4078	0.873	0.023	2560	0.3945	0.794	0.0002
exm1333905	17	46894377	rs3959442	C/A	TTLL6	NS	11920	0.284228	1.015	0.63	0.51	3263	0.3483	0.869	0.011	571	0.1873	0.958	0.81	3034	0.1742	1.033	0.65	2492	0.3971	0.986	0.82	2560	0.2699	1.267	0.00023
exm164063	1	242030355	rs148510810	A/G	EXO1	NS	11920	0.000132538	5.787	0.014	0.76	3263	0	NA	NA	571	0	NA	NA	3034	0	NA	NA	2492	0.000768	<0.001	0.18	2560	0	>999.999	0.00028
exm271258	2	225670901	rs4674941	C/G	DOCK10	NS	11920	0.222531	1.067	0.087	0.093	3263	0.5501	0.992	0.88	571	0.07692	0.529	0.042	3034	0.04722	0.831	0.18	2492	0.1217	1.166	0.075	2560	0.1272	1.351	0.00029
exm1299742	17	17942293	rs149036879	T/C	ATPAF2	NS	11901	0.0102068	1.092	0.52	0.99	3256	0.000233	5.528	0.096	571	0.06328	0.69	0.23	3030	0.02461	1.094	0.6	2485	0.001152	2.008	0.34	2559	0	>999.999	0.00029
exm1440231	19	16908639	rs73008597	T/C	NWD1	NS	11920	0.000861498	1.85	0.12	0.68	3263	0.002097	0.444	0.29	571	0	>999.999	0.21	3034	0	NA	NA	2492	0.000768	<0.001	0.15	2560	0.0005945	9.955	0.0003
exm1555029	20	60768573	rs41284984	T/C	GTPBP5	NS	11912	0.0164456	1.367	0.0013	0.37	3260	0.007929	1.119	0.69	570	0.01244	1.379	0.57	3031	0	>999.999	0.37	2492	0.03034	1.081	0.64	2559	0.03718	1.638	0.0003
exm-rs10486567	7	27976563	rs10486567	A/G	JAZF1	other/GWAS	11917	0.491383	0.865	7.7e-06	0.52	3262	0.2942	0.86	0.01	570	0.6281	0.824	0.19	3034	0.9003	0.853	0.077	2492	0.4478	0.955	0.43	2559	0.2548	0.77	0.00031
exm1207133	16	2296877	rs141206306	T/C	ECI1	NS	11920	0.00271703	2.117	0.00039	0.83	3263	0.00233	1.633	0.3	571	0	>999.999	0.03	3034	0.0002485	<0.001	0.45	2492	0.002688	1.192	0.74	2560	0.006837	2.623	0.00035
exm801087	9	139914819	rs140319041	A/G	ABCA2	NS	11916	6.62778e-05	18.91	0.00012	0.38	3260	0	>999.999	0.21	570	0	NA	NA	3034	0	NA	NA	2492	0	NA	NA	2560	0.0002973	16.418	0.00038
exm2271531	11	81979892	rs611530	T/C	MIR4300	other	11920	0.495229	1.057	0.051	0.26	3263	0.6531	0.972	0.61	571	0.2543	1.155	0.36	3034	0.3482	1.015	0.8	2492	0.4439	1.023	0.69	2560	0.5672	1.237	0.00039
exm-rs10896449	11	68994667	rs10896449	G/A	MYEOV	other/GWAS	11920	0.396355	1.183	1.1e-07	0.73	3263	0.6687	1.089	0.13	571	0.3933	1.326	0.062	3034	0.04374	1.219	0.11	2492	0.3391	1.195	0.0034	2560	0.5158	1.235	0.00041
exm2265456	3	59475736	rs6780771	A/G	FHIT	other	11920	0.502253	0.958	0.12	0.62	3263	0.5615	0.933	0.19	571	0.5261	1.15	0.33	3034	0.5288	1.023	0.69	2492	0.4424	1.041	0.49	2560	0.4355	0.809	0.00043
exm216700	2	101591304	rs2305160	A/G	NPAS2	NS	11920	0.221471	0.981	0.56	0.49	3263	0.1074	1.224	0.015	571	0.1663	1.079	0.68	3034	0.1891	0.973	0.7	2492	0.2903	1.054	0.4	2560	0.3656	0.801	0.00044
exm640640	7	100014711	rs6465770	C/T	ZCWPW1	NS	11920	0.0280318	0.796	0.009	0.29	3263	0.01701	1.017	0.94	571	0.01489	2.018	0.15	3034	0.000497	<0.001	0.24	2492	0.03917	0.931	0.64	2560	0.06956	0.629	0.00046
exm1358937	17	74725812	NA	T/C	METTL23	NS	11920	0.000198807	4.191	0.029	0.79	3263	0.000699	<0.001	0.24	571	0	NA	NA	3034	0	NA	NA	2492	0	NA	NA	2560	0	>999.999	0.00051
exm1169673	15	65321780	rs188718836	T/A	MTFMT	NS	11917	0.0068929	0.711	0.056	0.15	3262	0.005361	0.904	0.79	571	0.002481	0.997	1	3034	0.0002485	<0.001	0.52	2491	0.008065	1.342	0.33	2559	0.01694	0.319	0.00052
exm1333967	17	46939658	rs10278	G/C	CALCOCO2	NS	11907	0.296274	1.001	0.99	0.93	3261	0.3374	0.885	0.029	570	0.196	0.895	0.54	3030	0.1847	0.996	0.95	2486	0.4319	0.948	0.36	2560	0.2964	1.245	0.00054
exm41465	1	33361287	rs10914632	A/G	TMEM54	NS	11920	0.010603	0.621	0.0022	0.1	3263	0.007689	0.623	0.19	571	0.007444	0.786	0.75	3034	0	>999.999	0.24	2492	0.00576	1.168	0.67	2560	0.03151	0.478	0.00055
exm2268423	22	43432826	rs5751416	A/G	TTLL1	other	11908	0.448322	1.101	0.00069	0.7	3263	0.5904	1.095	0.091	571	0.4677	1.164	0.28	3025	0.261	1.115	0.079	2491	0.4285	0.978	0.72	2558	0.5012	1.228	0.00057
exm874369	11	1081112	rs41345745	C/G	MUC2	NS	11919	0.35507	1.019	0.51	0.29	3262	0.4033	0.912	0.089	571	0.3672	0.995	0.97	3034	0.4391	1.019	0.73	2492	0.3564	1.04	0.52	2560	0.1891	1.281	0.00058
exm2256588	4	35653192	rs13145490	G/T	ARAP2	other	11919	0.491848	1.004	0.89	0.45	3263	0.555	0.984	0.76	571	0.4864	0.901	0.44	3033	0.3454	0.88	0.029	2492	0.563	1.001	0.98	2560	0.5327	1.228	0.00061
exm2271600	11	38306585	rs2045737	G/T	NOT_FOUND	other/AIMS	11920	0.273294	0.972	0.45	0.33	3263	0.6258	1.005	0.94	571	0.2382	0.833	0.29	3034	0.2018	1.069	0.32	2492	0.09524	0.957	0.66	2560	0.05529	0.59	0.00061
exm2262679	9	79300111	rs476612	G/T	PRUNE2	other/AIMS	11920	0.238966	1.078	0.046	0.63	3263	0.5867	1.078	0.18	571	0.1017	1.112	0.61	3034	0.1056	0.847	0.075	2492	0.1187	1.055	0.54	2560	0.08086	1.408	0.00062
exm1544907	20	44237357	rs139643257	A/G	WFDC9	NS	11920	0.00132538	1.475	0.24	0.46	3263	0.001864	<0.001	0.043	571	0.001241	<0.001	0.67	3034	0	NA	NA	2492	0.00192	0.621	0.52	2560	0.001784	4.622	0.00062
exm886665	11	6661352	rs150834672	T/C	DCHS1	NS	11920	0.000331345	4.956	0.00091	0.75	3263	0.000233	1.504	0.77	571	0	>999.999	0.23	3034	0	NA	NA	2492	0.000768	1.353	0.76	2560	0.0005945	9.035	0.00069
exm935911	11	68777323	rs11544721	C/T	MRGPRF	SP	11917	0.311307	1.036	0.23	0.22	3261	0.3271	0.981	0.73	571	0.366	1.187	0.23	3033	0.325	0.998	0.97	2492	0.2869	0.97	0.64	2560	0.2806	1.241	0.00072
exm123379	1	171486912	rs10913157	A/G	PRRC2C	NS	11918	0.127469	0.986	0.74	0.78	3262	0.07576	1.161	0.12	571	0.1799	1.158	0.39	3034	0.1687	1.071	0.35	2492	0.1129	0.935	0.46	2559	0.1428	0.734	0.00073
exm669247	7	149475056	NA	A/G	SSPO	NS	11920	0	>999.999	0.001	0.69	3263	0	NA	NA	571	0	NA	NA	3034	0	NA	NA	2492	0	NA	NA	2560	0	>999.999	0.00075
exm184129	2	30993308	NA	A/T	CAPN13	NS	11920	0.000132538	8.305	0.0013	0.93	3263	0.000233	2.357	0.53	571	0	NA	NA	3034	0	NA	NA	2492	0	NA	NA	2560	0.0002973	14.846	0.00076
exm2260416	15	32347464	rs35114543	C/T	CHRNA7	other/AIMS	11920	0.365408	1.082	0.015	0.9	3263	0.1985	1.082	0.26	571	0.4256	1.2	0.21	3034	0.1506	0.955	0.54	2492	0.5257	1.026	0.67	2560	0.6968	1.256	0.00076
exm345051	3	124462824	rs3772809	G/A	UMPS	NS	11918	0.0333333	0.985	0.84	0.073	3262	0.003495	0.713	0.52	571	0.01117	3.709	0.0064	3034	0.08151	0.88	0.22	2491	0.04416	0.892	0.43	2560	0.0107	2.151	0.00081
exm242062	2	172841213	rs73976541	T/C	HAT1	NS	11868	0.0196756	1.023	0.82	0.17	3229	0.06696	0.982	0.86	571	0.002481	<0.001	0.45	3029	0	>999.999	0.18	2487	0.003456	0.992	0.99	2552	0	>999.999	0.00082
exm2271863	12	100775956	rs7311096	T/C	SLC17A8	other/AIMS	11920	0.197946	0.923	0.041	0.89	3263	0.1158	0.955	0.61	571	0.1476	1.334	0.18	3034	0.003728	2.182	0.049	2492	0.2746	0.993	0.91	2560	0.4878	0.817	0.00086
exm1021377	12	70965009	rs149998223	A/G	PTPRB	NS	11920	0.00139165	1.197	0.58	0.38	3263	0.000932	<0.001	0.17	571	0.001241	<0.001	0.27	3034	0	NA	NA	2492	0.005376	0.74	0.48	2560	0.0005945	8.815	0.00087
exm1024239	12	81528625	rs61745251	T/C	ACSS3	NS	11920	0.0785288	0.94	0.25	0.28	3263	0.1358	1.025	0.75	571	0.01861	1.464	0.38	3034	0.1218	0.885	0.16	2492	0.02074	0.945	0.78	2560	0.01278	0.255	0.00087
exm674200	7	151874581	rs149373512	C/G	MLL3	NS	11918	0.00212089	1.715	0.039	0.24	3261	0.001632	0.297	0.23	571	0.006203	0.422	0.44	3034	0	NA	NA	2492	0.000768	0.44	0.51	2560	0.005351	2.724	0.00089
exm-rs7642134	3	86916882	rs7642134	A/G	VGLL3	other/GWAS	11920	0.490126	0.919	0.0025	0.17	3263	0.521	0.972	0.6	571	0.6166	0.898	0.44	3034	0.4684	0.943	0.29	2492	0.533	0.939	0.28	2560	0.4132	0.815	0.00092
exm1100639	14	50923249	rs12881869	T/C	MAP4K5	NS	11920	0.0251822	1.285	0.0022	0.73	3263	0.01631	1.327	0.15	571	0.01737	1.535	0.33	3034	0.004722	0.6	0.28	2492	0.03187	1.05	0.76	2560	0.05767	1.46	0.00093
exm2273403	5	9041935	rs786840	G/A	SEMA5A	uRnaTargets	11919	0.278264	1.053	0.12	0.47	3263	0.5375	0.951	0.35	571	0.2146	1.001	0.99	3034	0.0917	1.12	0.22	2492	0.1966	1.031	0.68	2559	0.2491	1.247	0.001
exm2272543	17	60440732	rs67568091	C/T	EFCAB3	other	11918	0.483031	0.955	0.091	0.47	3263	0.524	0.981	0.71	571	0.4231	0.908	0.47	3032	0.4863	1.083	0.14	2492	0.3909	0.916	0.14	2560	0.5125	0.823	0.001
exm1620622	22	50555686	rs760749	C/A	MOV10L1	NS	11917	0.160989	0.926	0.05	0.14	3262	0.0473	0.897	0.41	571	0.2767	1.03	0.84	3033	0.2838	0.988	0.84	2491	0.1018	1.016	0.87	2560	0.1772	0.764	0.001
exm265978	2	219530662	rs41272683	A/G	RNF25	NS	11920	0.000331345	4.981	0.00071	0.54	3263	0.000233	2.27	0.55	571	0	>999.999	0.1	3034	0	NA	NA	2492	0.000768	2.38	0.31	2560	0.0005945	8.465	0.0011
exm697239	8	39468128	rs73605945	T/A	ADAM18	NS	11873	0.0357759	0.81	0.0092	0.32	3263	0.1065	0.885	0.16	571	0.004963	<0.001	0.069	2988	0	NA	NA	2492	0.01613	0.675	0.11	2559	0.01071	0.205	0.0011
exm971721	11	134062648	rs151013524	A/C	NCAPD3	NS	11920	0.00218688	0.278	0.0022	0.86	3263	0.000233	2.168	0.58	571	0	>999.999	0.031	3034	0.0002485	<0.001	0.47	2492	0.004224	0.369	0.077	2560	0.005945	<0.001	0.0011
exm1305196	17	26686416	rs11538927	A/G	TMEM199	NS	11919	0.068465	0.87	0.02	0.28	3263	0.00466	1.136	0.73	571	0.2519	0.866	0.39	3033	0.1604	0.86	0.052	2492	0.03725	1.149	0.35	2560	0.02021	0.397	0.0011
exm2254433	2	103066858	rs11465730	G/A	IL18RAP	other	11920	0.485951	1.005	0.86	0.45	3263	0.527	0.939	0.24	571	0.598	1.035	0.8	3034	0.5482	1.024	0.67	2492	0.3472	0.895	0.067	2560	0.4397	1.209	0.0012
exm564113	6	86199233	rs2229523	A/G	NT5E	NS	11920	0.244665	0.948	0.11	0.17	3263	0.09366	1.061	0.52	571	0.3052	1.106	0.49	3034	0.377	0.974	0.64	2492	0.1655	0.969	0.69	2560	0.3258	0.811	0.0012
exm25490	1	19504062	rs35444108	C/T	UBR4	NS	11920	0.00444003	0.574	0.019	0.98	3263	0.00233	0.77	0.66	571	0.003722	0.722	0.78	3034	0	NA	NA	2492	0.00576	0.991	0.98	2560	0.01159	0.242	0.0013
exm-rs4949526	1	30432219	rs4949526	T/C	MATN1	other/GWAS	11914	0.433497	0.976	0.43	0.93	3263	0.7565	1.094	0.17	571	0.3275	1.037	0.82	3030	0.2124	1.026	0.7	2490	0.414	1.005	0.93	2560	0.3258	0.811	0.0013
exm171024	2	7137067	rs364891	A/G	RNF144A	NS	11919	0.184849	1.036	0.31	0.1	3263	0.1431	0.929	0.34	571	0.2221	1.141	0.41	3034	0.1851	0.945	0.43	2492	0.2104	1.013	0.85	2559	0.2091	1.249	0.0013
exm-rs12621278	2	173311553	rs12621278	G/A	ITGA6	other/GWAS	11920	0.100928	0.816	5.4e-05	0.71	3263	0.01701	0.821	0.37	571	0.1042	0.695	0.14	3034	0.2331	0.874	0.045	2492	0.08065	0.804	0.053	2560	0.0648	0.639	0.0013
exm364120	3	169999670	rs55683301	G/A	PRKCI	SP	11920	0.025116	1.181	0.054	0.5	3263	0.006291	0.885	0.72	571	0.04963	0.781	0.46	3034	0.05915	1.118	0.32	2492	0.009217	1.001	1	2560	0.01486	1.906	0.0013
exm533062	6	31864538	rs115884658	A/G	EHMT2	NS	11920	0.0047051	1.757	0.0011	0.15	3263	0.004893	1.325	0.42	571	0.004963	1.089	0.92	3034	0	NA	NA	2492	0.001536	1.287	0.72	2560	0.01249	1.999	0.0013
exm2262189	6	90899561	rs2501720	A/G	BACH2	other/AIMS	11919	0.506296	1.034	0.26	0.36	3263	0.757	1.042	0.53	570	0.5398	0.863	0.27	3034	0.4868	0.962	0.48	2492	0.4009	1.021	0.73	2560	0.2833	1.23	0.0013
exm594155	6	167343141	rs11159	A/G	RNASET2	NS	11911	0.0722244	0.829	0.00067	0.86	3260	0.1028	0.968	0.7	571	0.04467	1.074	0.82	3032	0.03506	0.85	0.3	2488	0.07242	0.721	0.0065	2560	0.08413	0.685	0.0013
exm619542	7	47436435	rs143025033	G/C	TNS3	NS	11920	0.00311465	1.467	0.076	0.63	3263	0.003029	1.062	0.9	571	0.001241	1.74	0.74	3034	0	NA	NA	2492	0.006144	0.669	0.32	2560	0.005054	2.69	0.0013
exm624028	7	66098373	rs149255570	C/T	KCTD7	NS	11920	0.000198807	3.865	0.041	0.7	3263	0.000699	0.562	0.61	571	0	NA	NA	3034	0	NA	NA	2492	0	NA	NA	2560	0	>999.999	0.0013
exm712678	8	100994172	rs34200563	C/T	RGS22	NS	11920	0.000994036	2.227	0.021	0.53	3263	0.001165	1.426	0.63	571	0.001241	<0.001	0.46	3034	0.0002485	<0.001	0.42	2492	0.001152	0.983	0.98	2560	0.001486	4.784	0.0013
exm2273532	15	90171613	rs147387691	T/C	KIF7	uRnaTargets	11920	0.00165673	1.307	0.4	0.93	3263	0.001398	0.282	0.21	571	0.002481	<0.001	0.53	3034	0.002485	0.397	0.22	2492	0.000384	1.072	0.96	2560	0.001784	4.335	0.0013
exm-rs2735839	19	51364623	rs2735839	A/G	KLK3	other/GWAS	11918	0.297587	0.893	0.00031	0.054	3262	0.3013	1.087	0.14	571	0.5223	0.711	0.023	3034	0.3979	0.862	0.0086	2492	0.24	0.842	0.014	2559	0.1636	0.759	0.0013
exm-rs7349332	2	219756383	rs7349332	T/C	WNT10A	other/GWAS	11920	0.14619	1.08	0.046	0.76	3263	0.08993	1.068	0.47	571	0.2283	0.927	0.64	3034	0.2169	1.04	0.55	2492	0.1279	0.991	0.92	2560	0.1278	1.306	0.0014
exm2270765	7	82084287	rs6965042	T/G	CACNA2D1	other/AIMS	11878	0.260011	0.908	0.013	0.11	3253	0.6356	0.924	0.17	565	0.07519	0.725	0.27	3026	0.00995	0.755	0.35	2481	0.1562	1.069	0.4	2553	0.2048	0.781	0.0014
exm671970	7	150732812	rs17545756	T/C	ABCB8	NS	11920	0.0307488	0.802	0.0084	0.039	3263	0.01771	0.772	0.24	571	0.02109	0.61	0.37	3034	0.01541	1.011	0.96	2492	0.03456	1.002	0.99	2560	0.0651	0.652	0.0014
exm835898	10	76854612	rs145951301	G/A	DUSP13	NS	11920	0.000530152	3.315	0.0039	0.49	3263	0.000699	3.378	0.079	571	0	NA	NA	3034	0	NA	NA	2492	0.001536	1.165	0.83	2560	0.0002973	13.792	0.0014
exm1345990	17	62291105	rs28605685	A/G	TEX2	NS	11920	0.0626243	0.995	0.93	0.49	3263	0.2097	0.982	0.78	571	0.001241	1.376	0.83	3034	0	NA	NA	2492	0.01613	0.846	0.48	2560	0.0005945	10.025	0.0014
exm1527074	20	17930836	rs146672356	C/T	SNX5	NS	11920	0.000463883	2.543	0.053	0.92	3263	0.001165	<0.001	0.12	571	0	NA	NA	3034	0	NA	NA	2492	0	>999.999	0.42	2560	0.0005945	8.266	0.0014
exm-rs2058660	2	103054449	rs2058660	C/T	IL18RAP	other/GWAS	11919	0.289634	0.997	0.93	0.82	3263	0.1037	1.164	0.07	571	0.2866	0.908	0.53	3033	0.4132	0.977	0.68	2492	0.4485	1.102	0.1	2560	0.2568	0.796	0.0015
exm351408	3	132247160	rs140537885	G/T	DNAJC13	NS	11920	0.000994036	2.717	0.0023	0.84	3263	0.000699	2.294	0.3	571	0.001241	2.203	0.57	3034	0	NA	NA	2492	0.001152	1.158	0.86	2560	0.002378	3.686	0.0015
exm901055	11	36614521	rs140682926	G/C	RAG2	NS	11920	0.000198807	6.203	0.0018	0.93	3263	0.000233	5.792	0.086	571	0	NA	NA	3034	0	NA	NA	2492	0.000384	<0.001	0.32	2560	0.0002973	13.516	0.0015
exm1023273	12	78400847	rs61754793	A/G	NAV3	NS	11866	0.000598723	2.996	0.008	0.78	3263	0	>999.999	0.21	571	0.002481	<0.001	0.53	3022	0	NA	NA	2450	0.0007782	0.494	0.57	2560	0.001486	4.69	0.0015
exm1077223	13	102220193	rs1140605	T/G	ITGBL1	NS	11920	0.108748	0.973	0.55	0.34	3263	0.1657	1.042	0.56	571	0.05335	0.909	0.77	3034	0.1382	0.999	0.99	2492	0.05069	1.058	0.66	2560	0.05916	0.633	0.0015
exm1162087	15	51975608	rs2305710	A/G	SCG3	NS	11919	0.0312127	1.145	0.066	0.05	3263	0.01002	0.802	0.45	571	0.01489	1.469	0.51	3034	0.03007	0.964	0.82	2491	0.07911	1.119	0.29	2560	0.02646	1.638	0.0015
exm1163805	15	55759193	rs600753	T/C	DYX1C1	NS	11919	0.457251	1.067	0.026	0.25	3263	0.6726	1.042	0.47	571	0.531	1.09	0.54	3033	0.2857	0.948	0.39	2492	0.3207	1.113	0.087	2560	0.4756	1.206	0.0015
exm1384792	18	43535154	NA	T/C	EPG5	NS	11920	0.000530152	1.859	0.2	0.31	3263	0.000699	<0.001	0.19	571	0.001241	<0.001	0.43	3034	0	NA	NA	2492	0.001152	0.759	0.77	2560	0.0002973	13.518	0.0015
exm1551060	20	52192637	rs34323943	C/T	ZNF217	NS	11920	0.0690524	0.911	0.095	0.34	3263	0.02633	0.882	0.48	571	0.2159	0.929	0.67	3034	0.02734	1.413	0.026	2492	0.08986	0.982	0.85	2560	0.1222	0.735	0.0015
exm1574445	21	44293744	rs2248490	G/C	WDR4	NS	11889	0.498671	0.937	0.023	0.11	3254	0.6952	0.973	0.63	568	0.3063	0.881	0.41	3022	0.4065	1.005	0.93	2488	0.3626	0.948	0.38	2557	0.5092	0.83	0.0015
exm-rs917997	2	103070568	rs917997	A/G	IL18RAP	other/GWAS	11920	0.289198	0.998	0.96	0.82	3263	0.1039	1.155	0.086	571	0.2866	0.924	0.61	3034	0.4125	0.98	0.72	2492	0.447	1.104	0.093	2560	0.2565	0.797	0.0016
exm337111	3	111799867	rs192110889	A/G	TMPRSS7	NS	11920	0.000795229	2.285	0.023	0.98	3263	0.000699	0.634	0.69	571	0.002481	1.822	0.64	3034	0	NA	NA	2492	0.001536	1.158	0.84	2560	0.0008918	5.678	0.0016
exm464357	5	79755260	rs138937288	G/A	ZFYVE16	NS	11920	0.000994036	1.92	0.062	0.99	3263	0.000466	4.214	0.073	571	0	NA	NA	3034	0	NA	NA	2492	0.003456	0.385	0.15	2560	0.001189	5.246	0.0016
exm645092	7	100692224	rs144403703	G/C	MUC17	NS	11920	0.000331345	3.293	0.023	0.28	3263	0.000466	0.92	0.95	571	0	NA	NA	3034	0	NA	NA	2492	0.000384	<0.001	0.19	2560	0.0005945	8.058	0.0016
exm749777	9	35752048	rs62620193	A/C	RGP1	NS	11917	0.00689381	1.261	0.13	0.1	3260	0.006063	1.026	0.94	571	0.007444	<0.001	0.072	3034	0.0002485	<0.001	0.47	2492	0.009985	0.821	0.52	2560	0.01338	1.957	0.0016
exm1506942	19	55451720	rs61746625	T/C	NLRP7	NS	11920	0.0055666	0.654	0.041	0.92	3263	0.004194	0.654	0.37	571	0.001241	<0.001	0.55	3034	0	>999.999	0.03	2492	0.004608	1.368	0.42	2560	0.01576	0.349	0.0016
exm1533958	20	31767470	rs1075435	C/G	C20orf70	NS	11919	0.0791252	0.978	0.7	0.31	3262	0.2365	0.976	0.69	571	0.008685	1.512	0.51	3034	0.02883	0.826	0.28	2492	0.01882	0.822	0.38	2560	0.002081	4.305	0.0016
exm33549	1	26299050	rs35020920	A/G	PAFAH2	SP	11920	0.0055666	1.578	0.0046	0.79	3263	0.00466	1.26	0.53	571	0.007444	1.292	0.73	3034	0	NA	NA	2492	0.008833	1.228	0.48	2560	0.0104	2.091	0.0017
exm-rs13015714	2	102971865	rs13015714	G/T	IL1RL1	other/GWAS	11916	0.294047	0.989	0.72	0.33	3263	0.141	1.034	0.66	571	0.2816	0.96	0.79	3032	0.3943	0.996	0.94	2492	0.4485	1.096	0.12	2558	0.2528	0.797	0.0017
exm606688	7	15430495	rs139972453	A/C	AGMO	NS	11918	0.000397667	2.542	0.08	0.83	3261	0.0004662	<0.001	0.36	571	0	NA	NA	3034	0.000497	<0.001	0.34	2492	0.000384	0.781	0.86	2560	0.0002973	13.394	0.0017
exm973596	12	1022569	rs4987208	C/A	RAD52	ST	11870	0.0240468	0.984	0.85	0.63	3261	0.007925	0.798	0.48	571	0.007444	1.001	1	3033	0.0002485	<0.001	0.51	2448	0.1019	0.871	0.16	2557	0.01755	1.827	0.0017
S3.4 Japanese Americans
							Overall					African American				Native Hawaiian				Japanese American				Latino				European American
SNP	Chr	Position	SNP ID	A1/A2	Gene	Type	No. of samples	MAF	OR	P	P_Het	No. of samples	MAF	OR	P	No. of samples	MAF	OR	P	No. of samples	MAF	OR	P	No. of samples	MAF	OR	P	No. of samples	MAF	OR	P
exm-rs1456315	8	128103937	rs1456315	G/A	PCAT1	other/GWAS	11920	0.498343	0.762	8.6e-22	0.3	3263	0.4811	0.866	0.007	571	0.5161	0.586	0.00016	3034	0.341	0.613	4.4e-15	2492	0.5246	0.835	0.0017	2560	0.684	0.764	1.3e-05
exm-rs1016343	8	128093297	rs1016343	T/C	PCAT1	other/GWAS	11916	0.203925	1.297	1.5e-15	0.85	3261	0.2114	1.057	0.38	571	0.1501	1.353	0.098	3033	0.2631	1.459	1.1e-10	2491	0.138	1.141	0.11	2560	0.1876	1.535	1.2e-09
exm-rs16901979	8	128124916	rs16901979	A/C	PCAT1	other/GWAS	11920	0.177999	1.473	6.2e-25	0.7	3263	0.3847	1.36	1.1e-08	571	0.1216	2.386	4.9e-07	3034	0.1774	1.516	4.1e-10	2492	0.03533	1.767	5.4e-05	2560	0.03894	1.303	0.065
exm-rs4242382	8	128517573	rs4242382	A/G	LOC727677	other/GWAS	11920	0.176342	1.349	1.3e-17	0.91	3263	0.2917	1.11	0.069	571	0.2035	1.976	1.5e-05	3034	0.1667	1.533	4.6e-10	2492	0.08986	1.651	3.9e-08	2560	0.1011	1.254	0.013
exm-rs7837688	8	128539360	rs7837688	T/G	LOC727677	other/GWAS	11920	0.097283	1.51	6.8e-22	0.17	3263	0.05638	1.349	0.0043	571	0.1787	2.008	1.1e-05	3034	0.1461	1.564	5.5e-10	2492	0.06682	1.745	1e-07	2560	0.09512	1.264	0.012
exm-rs4242384	8	128518554	rs4242384	C/A	LOC727677	other/GWAS	11920	0.127104	1.436	6.8e-21	0.48	3263	0.1328	1.241	0.0034	571	0.1935	2.056	5.7e-06	3034	0.1638	1.526	8.6e-10	2492	0.07796	1.664	1.6e-07	2560	0.0981	1.258	0.013
exm-rs13252298	8	128095156	rs13252298	G/A	PCAT1	other/GWAS	11920	0.266269	0.844	1.8e-07	0.78	3263	0.07968	0.939	0.54	571	0.4677	0.66	0.0031	3034	0.3611	0.723	4.3e-08	2492	0.3364	0.982	0.77	2560	0.2883	0.884	0.063
exm-rs1447295	8	128485038	rs1447295	A/C	LOC727677	other/GWAS	11920	0.17674	1.327	9.9e-16	0.88	3263	0.2912	1.141	0.02	571	0.1998	2.109	2.2e-06	3034	0.173	1.417	4e-07	2492	0.08525	1.566	1.9e-06	2560	0.1005	1.258	0.012
exm514211	6	6266854	rs140712764	T/C	F13A1	NS	11920	6.62691e-05	28.007	9.1e-07	0.66	3263	0.000233	6.751	0.049	571	0	NA	NA	3034	0	>999.999	5.5e-06	2492	0	NA	NA	2560	0	NA	NA
exm-rs12653946	5	1895829	rs12653946	T/C	IRX4	other/GWAS	11919	0.433059	1.15	4.1e-07	0.9	3263	0.4	1.142	0.013	571	0.3772	1.73	5.8e-05	3034	0.4456	1.289	6.8e-06	2492	0.4858	1.046	0.45	2559	0.4328	1.072	0.24
exm-rs9284813	3	87152169	rs9284813	G/A	VGLL3	other/GWAS	11920	0.235852	1.129	0.00021	0.11	3263	0.3949	0.925	0.16	571	0.1464	1.263	0.21	3034	0.1981	1.336	1e-05	2492	0.1671	1.316	0.00022	2560	0.1528	1.114	0.17
exm2273035	22	38898051	rs138457	T/C	DDX17	other	11919	0.46945	0.972	0.3	0.18	3263	0.5137	1.068	0.21	571	0.4777	0.887	0.37	3034	0.5897	0.791	3e-05	2491	0.3376	1.012	0.84	2560	0.3692	1.072	0.25
exm644488	7	100680521	rs73712043	A/G	MUC17	NS	11917	0.0298953	1.026	0.75	0.93	3260	0.07533	0.822	0.063	571	0.03474	1.595	0.17	3034	0.006213	2.749	6.9e-05	2492	0.01114	1.275	0.34	2560	0.01367	1.012	0.96
exm-rs1512268	8	23526463	rs1512268	A/G	NKX3-1	other/GWAS	11919	0.48277	1.155	2.4e-07	0.86	3263	0.6274	1.144	0.016	571	0.5409	1.065	0.66	3033	0.3765	1.25	7.9e-05	2492	0.4447	1.171	0.0066	2560	0.4408	1.108	0.083
exm-rs7501939	17	36101156	rs7501939	T/C	HNF1B	other/GWAS	11919	0.388587	0.894	8.6e-05	0.048	3263	0.5	0.972	0.58	571	0.2717	0.799	0.15	3033	0.3232	0.789	9.5e-05	2492	0.3326	0.912	0.14	2560	0.396	0.881	0.039
exm644623	7	100681751	rs73712044	G/A	MUC17	NS	11919	0.0275716	1.057	0.51	0.98	3263	0.06757	0.844	0.12	571	0.03474	1.595	0.17	3033	0.006464	2.646	0.00011	2492	0.01037	1.265	0.37	2560	0.01338	1.026	0.92
exm971959	11	134128968	NA	G/A	ACAD8	NS	11920	0	>999.999	3.2e-05	0.23	3263	0	>999.999	0.17	571	0	NA	NA	3034	0	>999.999	0.00011	2492	0	NA	NA	2560	0	NA	NA
exm709678	8	94738629	rs36117362	A/G	FAM92A1	NS	11900	0.0636943	1.079	0.16	0.82	3262	0.06104	1.295	0.011	571	0.0397	0.598	0.2	3024	0.0002491	19.057	0.00012	2490	0.09447	0.935	0.5	2553	0.1249	1.054	0.55
exm2273297	23	126962295	rs226644	C/T	NOT_FOUND	other/AIMS	8350	0.396127	1.08	0.0091	0.97	2224	0.8482	1.034	0.59	335	0.01796	2.379	0.0031	2078	0.04257	1.432	0.00015	1967	0.4981	1.026	0.58	1746	0.2316	1.042	0.48
exm370595	3	185986598	rs3213770	A/G	DGKG	NS	11920	0.00145792	2.266	0.0043	0.26	3263	0	NA	NA	571	0	NA	NA	3034	0.004225	3.133	0.00016	2492	0.001152	<0.001	0.069	2560	0.0005945	<0.001	0.28
exm-rs1265879	14	50877983	rs1265879	A/G	MAP4K5	other/GWAS	11920	0.248045	0.965	0.32	0.38	3263	0.5501	0.968	0.53	571	0.08189	1.233	0.39	3034	0.1021	0.681	0.00016	2492	0.1352	1.123	0.17	2560	0.1644	1.038	0.63
exm-rs6426749	1	22711473	rs6426749	C/G	ZBTB40	other/GWAS	11855	0.202757	1.067	0.06	0.62	3245	0.2657	1.032	0.59	563	0.1932	0.994	0.97	3002	0.2138	1.276	0.00018	2492	0.1229	0.876	0.14	2553	0.1738	1.055	0.49
exm323332	3	52861211	rs13072536	T/A	ITIH4	NS	11920	0.305765	0.908	0.0014	0.84	3263	0.212	0.953	0.46	571	0.3263	0.828	0.2	3034	0.379	0.806	0.00021	2492	0.4178	0.903	0.089	2560	0.2461	1.041	0.56
exm2268472	23	36501470	rs12009741	G/A	NOT_FOUND	other	8352	0.223284	0.916	0.0012	0.64	2224	0.2141	0.974	0.61	335	0.1976	0.766	0.086	2080	0.3006	0.831	0.00022	1967	0.1776	0.935	0.28	1746	0.1866	0.96	0.52
exm-rs10917468	1	19843354	rs10917468	C/T	CAPZB	other/GWAS	11918	0.327124	1.044	0.15	0.65	3263	0.4404	1.044	0.42	571	0.3474	1.118	0.45	3034	0.3042	1.239	0.00025	2491	0.2967	0.915	0.17	2559	0.2287	0.978	0.75
exm2273373	3	52874288	rs6445538	C/T	TMEM110,TMEM110-MUSTN1	uRnaTargets	11920	0.305169	0.909	0.0017	0.88	3263	0.2048	0.947	0.4	571	0.3288	0.832	0.21	3034	0.3787	0.808	0.00025	2492	0.4205	0.902	0.084	2560	0.2503	1.057	0.41
exm1551963	20	55108617	rs3209183	C/A	C20orf107	NS	11910	0.354216	1.047	0.12	0.19	3260	0.1056	1.008	0.93	571	0.531	1.211	0.16	3033	0.4577	1.22	0.00026	2487	0.51	0.94	0.29	2559	0.3847	0.982	0.76
exm-rs700651	2	198631714	rs700651	G/A	BOLL	other/GWAS	11918	0.347846	0.927	0.014	0.11	3263	0.1209	1.038	0.66	571	0.4504	0.995	0.97	3033	0.5224	0.819	0.00027	2492	0.4447	0.973	0.65	2559	0.3291	0.971	0.65
exm323211	3	52852538	rs4687657	T/G	ITIH4	NS	11914	0.318019	0.914	0.0028	0.8	3261	0.2162	0.959	0.52	570	0.3375	0.786	0.11	3033	0.3774	0.809	0.00027	2490	0.4374	0.913	0.12	2560	0.2797	1.052	0.44
exm1424151	19	10131999	rs1644731	T/C	RDH8	NS	11919	0.441808	0.961	0.15	0.2	3263	0.3973	1	0.99	571	0.495	0.994	0.96	3034	0.4205	0.813	0.00027	2492	0.4259	1.036	0.54	2559	0.5238	1.015	0.8
exm2268440	22	39100128	rs5757251	G/A	GTPBP1	other/AIMS	11898	0.488111	1.009	0.74	0.22	3249	0.2658	0.895	0.072	570	0.5286	1.139	0.35	3029	0.4856	1.223	0.00029	2490	0.6483	0.994	0.93	2560	0.6397	0.897	0.074
exm2272356	16	25753251	rs4268750	C/T	HS3ST4	other	11919	0.498012	0.977	0.41	0.36	3263	0.4974	1.017	0.75	571	0.6526	0.919	0.57	3033	0.3792	0.813	0.00031	2492	0.5315	1.008	0.89	2560	0.5779	1.121	0.056
exm2264497	12	85833160	rs1849384	C/A	ALX1	other/AIMS	11920	0.268787	1.12	0.0089	0.56	3263	0.7377	1.06	0.38	571	0.1241	1.332	0.15	3034	0.07505	1.409	0.00034	2492	0.08564	0.892	0.29	2560	0.07878	1.161	0.17
exm1767083	12	3039437	rs192385949	A/G	TULP3	NS	11920	0	>999.999	0.00055	0.36	3263	0	NA	NA	571	0	NA	NA	3034	0	>999.999	0.00036	2492	0	NA	NA	2560	0	NA	NA
exm-rs7524102	1	22698447	rs7524102	G/A	ZBTB40	other/GWAS	11920	0.214513	1.078	0.024	0.39	3263	0.3041	1.07	0.23	571	0.1923	1.028	0.88	3034	0.215	1.258	0.00038	2492	0.1252	0.894	0.2	2560	0.1742	1.045	0.56
exm-rs12032381	1	221617076	rs12032381	C/A	C1orf140	other/GWAS	11889	0.236828	0.938	0.053	0.93	3262	0.08322	0.913	0.37	569	0.3416	0.882	0.39	3007	0.3706	0.815	0.00041	2491	0.2577	1.058	0.39	2560	0.2322	1.036	0.61
exm375846	3	195594494	rs112384084	T/C	TNK2	NS	11920	0.0149768	1.307	0.012	0.17	3263	0.003728	1.144	0.75	571	0.009926	1.36	0.64	3034	0.0328	1.602	0.00041	2492	0.004224	0.563	0.26	2560	0.01754	0.94	0.79
exm2252000	14	92624111	rs117009742	G/A	CPSF2	S	11920	0.000331345	4.97	0.00093	0.71	3263	0	NA	NA	571	0.001241	<0.001	0.37	3034	0.000994	6.171	0.00041	2492	0	NA	NA	2560	0	NA	NA
exm1594390	22	24717850	rs204710	A/G	SPECC1L	other	11919	6.62778e-05	16.088	0.00042	0.24	3263	0	NA	NA	571	0	NA	NA	3034	0.0002485	16.111	0.00044	2491	0	NA	NA	2560	0	NA	NA
exm1594455	22	24761467	rs204718	G/A	SPECC1L	NS	11920	6.62691e-05	16.088	0.00042	0.24	3263	0	NA	NA	571	0	NA	NA	3034	0.0002485	16.111	0.00044	2492	0	NA	NA	2560	0	NA	NA
exm2272395	16	69547741	rs4783718	C/T	CYB5B	other	11919	0.45334	1.041	0.15	0.31	3263	0.3991	1.005	0.93	571	0.5993	1.011	0.94	3033	0.3762	1.215	0.00045	2492	0.4167	1.064	0.3	2560	0.6082	0.886	0.047
exm1106954	14	64519035	rs1890908	A/G	SYNE2	NS	11917	0.106854	1.099	0.035	0.48	3263	0.1233	0.999	0.99	571	0.3213	1.173	0.29	3032	0.1042	1.34	0.00047	2492	0.06644	0.833	0.13	2559	0.06897	1.22	0.074
exm2266991	10	49201964	rs3013936	A/G	FAM25B,FAM25C,FAM25G	other	11857	0.3386	1	0.99	0.78	3236	0.3207	1.036	0.53	567	0.4662	1.013	0.92	3028	0.3191	0.81	0.00048	2477	0.3974	1.114	0.07	2549	0.3088	1.09	0.17
exm599133	7	1976457	rs1801368	T/C	MAD1L1	NS	11916	0.317862	1.092	0.0034	0.65	3263	0.1244	0.942	0.47	571	0.4529	1.127	0.39	3030	0.3932	1.212	0.00055	2492	0.4236	1.099	0.1	2560	0.3606	1.025	0.69
exm1700892	11	130784838	rs185989409	A/G	SNX19	NS	11920	0.000530152	2.314	0.08	0.34	3263	0	NA	NA	571	0.007444	0.247	0.19	3034	0.0002485	15.988	0.00057	2492	0	NA	NA	2560	0.0002973	<0.001	0.47
exm-rs5762311	22	28090207	rs5762311	A/G	MN1	other/GWAS	11919	0.373492	0.965	0.26	0.26	3263	0.3103	1.023	0.69	571	0.567	1.235	0.21	3034	0.668	0.82	0.00058	2492	0.3145	1.032	0.62	2559	0.1011	1.042	0.69
exm1001508	12	50190667	rs3741554	T/A	NCKAP5L	NS	11910	0.252222	0.91	0.012	0.81	3263	0.01911	1.064	0.75	571	0.4268	0.962	0.79	3027	0.5779	0.827	0.00061	2489	0.3342	0.992	0.9	2560	0.05559	1.067	0.63
exm-rs6696981	1	22702858	rs6696981	T/G	ZBTB40	other/GWAS	11919	0.171328	1.063	0.097	0.33	3262	0.2347	1.05	0.43	571	0.1737	0.983	0.93	3034	0.2033	1.253	0.00063	2492	0.08602	0.9	0.31	2560	0.1177	0.96	0.66
exm1471025	19	41884327	rs77399851	C/T	TMEM91	NS	11920	0.0158383	1.139	0.22	0.55	3263	0.04846	1.037	0.76	571	0.003722	0.862	0.9	3034	0.003728	2.977	0.00063	2492	0.003072	0.99	0.98	2560	0.001486	0.814	0.81
exm605314	7	7412808	rs182575990	T/C	COL28A1	NS	11920	0.000662691	2.726	0.014	0.64	3263	0.000233	<0.001	0.51	571	0	NA	NA	3034	0.000994	5.879	0.00069	2492	0	>999.999	0.33	2560	0.001486	0.442	0.45
exm387571	4	7436486	rs11548325	A/C	PSAPL1	NS	11919	0.215602	1.05	0.15	0.34	3263	0.1507	0.999	0.98	570	0.4565	1.085	0.58	3034	0.2741	1.225	0.00072	2492	0.2746	0.936	0.31	2560	0.1251	1.028	0.76
exm2273192	23	126287039	rs1291954	T/C	NOT_FOUND	other	8344	0.437311	1.053	0.024	0.44	2223	0.5691	0.995	0.91	333	0.4788	0.976	0.83	2078	0.4337	1.162	0.00073	1965	0.4556	1.016	0.73	1745	0.2491	1.071	0.21
exm2157937	7	97875349	rs79382137	T/C	TECPR1	NS	11920	0.00298211	0.263	0.00095	0.63	3263	0	NA	NA	571	0.001241	<0.001	0.42	3034	0.01093	0.255	0.00078	2492	0	NA	NA	2560	0	NA	NA
exm1123367	14	94121728	rs2296687	G/A	KIAA1409	NS	11920	0.00159046	2.436	0.00099	0.81	3263	0	NA	NA	571	0	NA	NA	3034	0.005716	2.524	0.00078	2492	0	NA	NA	2560	0.0002973	<0.001	0.5
exm2245500	7	27159136	rs6969780	C/G	HOXA3	SP	11918	0.19112	0.982	0.61	0.11	3263	0.2796	1.044	0.45	571	0.165	1.481	0.028	3033	0.1725	0.772	0.00079	2491	0.2047	1.021	0.77	2560	0.09631	1.097	0.34
exm2269666	3	128127805	rs7612413	C/T	EEFSEC	other/AIMS	11918	0.356357	0.999	0.98	0.44	3263	0.6156	1.098	0.12	569	0.3279	1.392	0.035	3034	0.4093	0.826	0.00084	2492	0.2135	0.974	0.72	2560	0.07967	1.243	0.043
exm1384338	18	43307246	rs11877062	T/C	SLC14A1	NS	11918	0.431857	1.057	0.05	0.54	3263	0.2647	1.026	0.67	571	0.4132	0.792	0.11	3034	0.5393	1.204	0.00085	2491	0.4962	1.031	0.6	2559	0.4714	1.015	0.8
exm1972683	20	62364653	NA	T/G	ZGPAT	NS	11920	0.000662691	2.575	0.016	0.69	3263	0	NA	NA	571	0.003722	<0.001	0.15	3034	0.001491	4.331	0.00085	2492	0	NA	NA	2560	0.0002973	<0.001	0.45
exm2266390	7	33139147	rs17472556	A/G	RP9	other	11912	0.463978	0.945	0.043	0.83	3263	0.5473	1.121	0.031	564	0.5265	1.043	0.77	3033	0.3819	0.825	0.00086	2492	0.4178	0.872	0.02	2560	0.4768	0.925	0.19
exm42603	1	34238283	rs474474	C/T	CSMD2	NS	11911	0.339191	0.937	0.029	0.64	3258	0.5021	0.938	0.22	570	0.3433	0.996	0.98	3032	0.2709	0.807	0.00087	2492	0.2719	0.976	0.7	2559	0.2643	1.07	0.31
exm2270923	8	128491792	rs7836840	T/G	LOC727677	other	11920	0.485487	1.111	0.00014	0.14	3263	0.4369	1.074	0.17	571	0.6005	1.272	0.096	3034	0.5065	1.206	0.00088	2492	0.5077	1.038	0.53	2560	0.4777	1.113	0.068
exm881387	11	4791111	rs17324812	C/T	OR51F1	NS	11919	0.129423	0.89	0.0065	0.43	3263	0.06897	0.933	0.53	571	0.08561	0.975	0.92	3034	0.07107	0.676	0.00093	2491	0.1525	0.888	0.15	2560	0.269	0.94	0.36
exm-rs17122693	14	51084235	rs17122693	C/T	ATL1	other/GWAS	11920	0.154208	0.966	0.38	0.32	3263	0.301	0.924	0.17	571	0.04963	1.397	0.28	3034	0.07381	0.677	0.00097	2492	0.09985	1.189	0.063	2560	0.1302	1.065	0.46
exm2273328	1	95363001	rs3789699	C/T	CNN3	uRnaTargets	11908	0.0714096	1.012	0.82	0.68	3260	0.07456	0.873	0.2	571	0.04715	0.671	0.29	3029	0.04331	1.475	0.001	2490	0.06912	1.027	0.82	2558	0.1086	0.926	0.43
exm-rs2535629	3	52833219	rs2535629	T/C	ITIH3	other/GWAS	11918	0.498807	0.941	0.03	0.86	3262	0.6617	0.98	0.72	571	0.4057	0.807	0.13	3034	0.4645	0.832	0.001	2491	0.4916	0.911	0.11	2560	0.36	1.104	0.1
exm-rs931555	5	35803577	rs931555	A/G	SPEF2	other/GWAS	11920	0.200199	1.067	0.059	0.78	3263	0.0918	1.175	0.075	571	0.1749	1.03	0.87	3034	0.2097	1.24	0.001	2492	0.2162	1.07	0.34	2560	0.3207	0.899	0.096
exm2245367	7	15725995	rs145506452	C/G	MEOX2	NS	11920	0	>999.999	0.0011	0.62	3263	0	NA	NA	571	0	NA	NA	3034	0	>999.999	0.001	2492	0	NA	NA	2560	0	NA	NA
exm1105587	14	60923783	rs11625921	C/T	C14orf39	NS	11920	0.0609013	1.165	0.008	0.39	3263	0.03518	0.812	0.17	571	0.06452	1.062	0.83	3034	0.1419	1.278	0.001	2492	0.02803	1.194	0.29	2560	0.0214	1.028	0.89
exm1106893	14	64496749	rs4027402	C/T	SYNE2	NS	11902	0.299549	1.081	0.018	0.31	3256	0.5518	1.05	0.38	571	0.4355	1.281	0.094	3027	0.2143	1.236	0.0011	2488	0.185	0.919	0.26	2560	0.1361	1.112	0.21
exm1372021	18	2724930	rs633422	T/A	SMCHD1	NS	11920	0.249636	1.083	0.013	0.79	3263	0.1037	1.201	0.035	571	0.2382	1.115	0.49	3034	0.2197	1.232	0.0011	2492	0.3218	0.932	0.25	2560	0.4185	1.092	0.14
exm1737678	1	176145082	rs138668228	T/C	RFWD2	NS	11920	0.000132538	7.878	0.0021	0.17	3263	0	NA	NA	571	0	NA	NA	3034	0.000497	8.638	0.0012	2492	0	NA	NA	2560	0	NA	NA
exm140939	1	204394056	rs193298214	T/C	PIK3C2B	NS	11920	0.000331345	3.808	0.0082	0.96	3263	0	NA	NA	571	0.002481	<0.001	0.24	3034	0.000497	8.443	0.0012	2492	0.000384	1.345	0.83	2560	0	NA	NA
exm198914	2	69049941	rs10177248	C/T	ARHGAP25	NS	11918	0.389714	0.958	0.14	0.85	3262	0.3636	0.975	0.64	571	0.2605	0.805	0.19	3033	0.5534	0.836	0.0012	2492	0.3041	1.027	0.67	2560	0.3243	1.055	0.39
exm2254535	2	126455657	rs7563352	G/A	CNTNAP5	other	11920	0.400133	1.012	0.68	0.79	3263	0.5811	0.928	0.16	571	0.3275	0.939	0.68	3034	0.2229	1.225	0.0012	2492	0.3802	1.047	0.44	2560	0.4141	0.949	0.39
exm2269237	2	236021090	rs7587059	C/T	SH3BP4	other	11920	0.495825	1.038	0.18	0.61	3263	0.5972	0.978	0.67	571	0.5596	1.075	0.61	3034	0.4724	1.194	0.0012	2492	0.4186	0.991	0.87	2560	0.4391	1.001	0.99
exm2266338	6	122313558	rs2679672	G/A	HSF2	other/AIMS	11920	0.450895	0.952	0.1	0.96	3263	0.6952	0.989	0.85	571	0.4764	1.068	0.64	3034	0.4622	0.835	0.0012	2492	0.2454	1.045	0.51	2560	0.2785	0.97	0.65
exm2271221	9	120490389	rs6478322	T/C	TLR4	other/AIMS	11920	0.140292	1.051	0.3	0.72	3263	0.4308	0.983	0.76	571	0.02109	1.263	0.6	3034	0.02957	1.58	0.0012	2492	0.03379	1.109	0.51	2560	0.01308	1.087	0.76
exm1107115	14	64560092	rs2781377	A/G	SYNE2	ST	11916	0.101153	1.084	0.076	0.4	3263	0.1237	1.001	0.99	571	0.2345	1.102	0.55	3031	0.0997	1.322	0.0012	2492	0.06452	0.847	0.17	2559	0.07049	1.159	0.19
exm1228070	16	25255366	rs61746620	A/G	ZKSCAN2	NS	11918	0.000132556	11.133	8.9e-05	0.22	3262	0.0002331	6.68	0.058	571	0	>999.999	0.24	3034	0.0002485	14.054	0.0012	2491	0	NA	NA	2560	0	NA	NA
exm1393677	18	74155000	rs3752097	C/T	ZNF516	NS	11918	0.0731045	0.913	0.11	0.41	3263	0.1731	0.971	0.68	571	0.01737	1.908	0.15	3034	0.03255	0.539	0.0012	2490	0.03766	0.882	0.42	2560	0.03478	0.974	0.87
exm2265144	2	43783141	rs6725776	G/A	THADA	other	11920	0.356064	0.909	0.0011	0.87	3263	0.4821	0.955	0.38	571	0.3226	0.845	0.26	3034	0.3173	0.823	0.0013	2492	0.2312	0.951	0.48	2560	0.3463	0.938	0.3
exm2254828	2	181314519	rs7606036	T/G	CWC22	other	11894	0.481002	1.037	0.18	0.57	3259	0.5779	1.009	0.87	571	0.3797	1.101	0.5	3020	0.4446	1.194	0.0013	2487	0.4056	0.985	0.8	2557	0.4833	0.954	0.42
exm1994103	2	198570253	NA	A/G	MARS2	NS	11920	0.000331345	3.644	0.016	0.98	3263	0	NA	NA	571	0.002481	1.073	0.96	3034	0.000497	8.758	0.0013	2492	0.000384	<0.001	0.35	2560	0	NA	NA
exm982490	12	9258857	rs2229298	T/C	A2M	NS	11919	0.0213386	0.965	0.69	0.29	3263	0.002796	0.619	0.41	571	0.004963	0.537	0.59	3033	0.01665	0.388	0.0013	2492	0.08909	1.107	0.31	2560	0.002081	1.709	0.39
exm1055697	13	20763642	rs2274084	T/C	GJB2	NS	11920	0.128429	1.153	0.0013	0.98	3263	0.003728	0.713	0.51	571	0.09801	0.957	0.85	3034	0.3549	1.196	0.0013	2492	0.1486	1.108	0.21	2560	0.008323	1.075	0.83
exm2267708	14	51148070	rs3015476	A/G	SAV1	other/AIMS	11868	0.295219	0.973	0.46	0.96	3253	0.683	0.969	0.59	571	0.07196	0.96	0.88	3002	0.08558	0.703	0.0013	2486	0.1677	1.12	0.14	2556	0.2032	1.013	0.86
exm2253191	17	72351406	rs2271536	T/C	KIF19	S	11918	0.330528	0.997	0.91	0.47	3262	0.2584	1.077	0.22	571	0.3114	1.11	0.49	3033	0.3212	0.823	0.0013	2492	0.4309	1.012	0.85	2560	0.3606	1.092	0.14
exm283174	2	241969887	rs185349960	A/G	SNED1	NS	11920	0.000331345	5.45	0.00035	0.72	3263	0.000466	1.991	0.49	571	0	NA	NA	3034	0.0007455	6.503	0.0014	2492	0	NA	NA	2560	0	>999.999	0.11
exm2158537	7	99220196	NA	G/C	ZNF498	NS	11920	0.000397614	4.322	0.0014	0.14	3263	0	NA	NA	571	0	NA	NA	3034	0.001491	4.35	0.0014	2492	0	NA	NA	2560	0	NA	NA
exm1796454	1	3412567	rs78042623	T/C	MEGF6	NS	11919	0.00112672	2.511	0.0044	0.74	3262	0	NA	NA	571	0.002481	<0.001	0.3	3034	0.003728	2.881	0.0015	2492	0	NA	NA	2560	0	NA	NA
exm229703	2	136393658	rs961360	G/A	R3HDM1	SP	11920	0.302452	1.072	0.022	0.61	3263	0.209	0.923	0.22	571	0.5484	0.873	0.37	3034	0.4453	1.193	0.0015	2492	0.3107	1.066	0.3	2560	0.1855	1.146	0.064
exm991280	12	27648710	rs3751223	T/C	C12orf70	NS	11879	0.169105	0.894	0.0031	0.55	3227	0.1302	0.827	0.013	569	0.301	0.842	0.27	3034	0.3121	0.827	0.0015	2490	0.1123	1.052	0.57	2559	0.05945	1.086	0.49
exm1107023	14	64522843	rs8010699	A/G	SYNE2	NS	11884	0.295056	1.069	0.039	0.55	3260	0.5201	1.064	0.26	571	0.4429	1.225	0.16	3011	0.2115	1.228	0.0016	2489	0.1929	0.886	0.11	2553	0.1508	1.086	0.31
exm127137	1	179398726	rs150583143	G/A	AXDND1	NS	11919	0.0143141	1.09	0.4	0.61	3263	0.001864	0.233	0.15	571	0	NA	NA	3034	0.003728	2.872	0.0017	2491	0.07181	1.035	0.75	2560	0.001784	0.708	0.68
exm1384400	18	43319519	rs1058396	A/G	SLC14A1	NS	11920	0.437177	1.045	0.12	0.42	3263	0.2982	0.993	0.91	571	0.4094	0.791	0.11	3034	0.5348	1.19	0.0017	2492	0.4946	1.036	0.54	2560	0.4599	1.005	0.94
exm2255564	2	99520608	rs4851173	T/C	C2orf55	other	11919	0.463746	1.007	0.82	0.48	3263	0.3096	1.021	0.72	571	0.5087	0.816	0.15	3033	0.5942	1.192	0.0018	2492	0.3648	0.918	0.16	2560	0.5702	0.92	0.16
exm395127	4	39083586	rs151197814	A/G	KLHL5	NS	11920	0.00119284	1.982	0.036	0.11	3263	0.003262	1.216	0.65	571	0	NA	NA	3034	0.0007455	6.282	0.0018	2492	0	NA	NA	2560	0.0002973	<0.001	0.52
exm2261646	4	161064449	rs11725207	T/C	RAPGEF2	other/AIMS	11915	0.395637	0.924	0.017	0.077	3263	0.7908	0.882	0.071	571	0.1352	1.078	0.71	3033	0.2131	0.802	0.0018	2489	0.3091	0.98	0.75	2559	0.239	1.017	0.8
exm654133	7	123152019	rs10255061	T/C	IQUB	NS	11920	0.292048	0.913	0.0026	0.33	3263	0.2423	0.925	0.21	571	0.2754	0.951	0.75	3034	0.3626	0.835	0.0018	2492	0.2834	0.948	0.41	2560	0.2818	0.97	0.65
exm1678700	10	31137496	rs182928199	C/T	ZNF438	NS	11920	0.00781975	0.574	0.0039	0.63	3263	0	NA	NA	571	0.008685	1.632	0.5	3034	0.02709	0.528	0.0018	2492	0.000384	<0.001	0.26	2560	0.0002973	2.066	0.62
S3.5 Latinos
							Overall					African American				Native Hawaiian				Japanese American				Latino				European American
SNP	Chr	Position	SNP ID	A1/A2	Gene	Type	No. of samples	MAF	OR	P	P_Het	No. of samples	MAF	OR	P	No. of samples	MAF	OR	P	No. of samples	MAF	OR	P	No. of samples	MAF	OR	P	No. of samples	MAF	OR	P
exm-rs4242382	8	128517573	rs4242382	A/G	LOC727677	other/GWAS	11920	0.176342	1.349	1.3e-17	0.91	3263	0.2917	1.11	0.069	571	0.2035	1.976	1.5e-05	3034	0.1667	1.533	4.6e-10	2492	0.08986	1.651	3.9e-08	2560	0.1011	1.254	0.013
exm-rs7837688	8	128539360	rs7837688	T/G	LOC727677	other/GWAS	11920	0.097283	1.51	6.8e-22	0.17	3263	0.05638	1.349	0.0043	571	0.1787	2.008	1.1e-05	3034	0.1461	1.564	5.5e-10	2492	0.06682	1.745	1e-07	2560	0.09512	1.264	0.012
exm-rs4242384	8	128518554	rs4242384	C/A	LOC727677	other/GWAS	11920	0.127104	1.436	6.8e-21	0.48	3263	0.1328	1.241	0.0034	571	0.1935	2.056	5.7e-06	3034	0.1638	1.526	8.6e-10	2492	0.07796	1.664	1.6e-07	2560	0.0981	1.258	0.013
exm-rs1447295	8	128485038	rs1447295	A/C	LOC727677	other/GWAS	11920	0.17674	1.327	9.9e-16	0.88	3263	0.2912	1.141	0.02	571	0.1998	2.109	2.2e-06	3034	0.173	1.417	4e-07	2492	0.08525	1.566	1.9e-06	2560	0.1005	1.258	0.012
exm231469	2	144899559	rs3731958	C/A	GTDC1	NS	11919	0.298051	0.933	0.028	0.099	3263	0.2919	0.958	0.47	571	0.1923	1.037	0.85	3034	0.16	0.99	0.89	2491	0.3036	0.746	1.1e-05	2560	0.492	1.022	0.71
exm536759	6	32802938	rs140654840	T/C	TAP2	NS	11920	0.0153744	0.941	0.58	0.93	3263	0.02167	1.41	0.034	571	0.002481	6.109	0.027	3034	0	NA	NA	2492	0.03303	0.437	3.3e-05	2560	0.01516	1.136	0.58
exm-rs16901979	8	128124916	rs16901979	A/C	PCAT1	other/GWAS	11920	0.177999	1.473	6.2e-25	0.7	3263	0.3847	1.36	1.1e-08	571	0.1216	2.386	4.9e-07	3034	0.1774	1.516	4.1e-10	2492	0.03533	1.767	5.4e-05	2560	0.03894	1.303	0.065
exm604706	7	6476104	rs117103601	A/G	DAGLB	NS	11920	0.0147117	1.157	0.17	0.41	3263	0.008621	0.684	0.26	571	0.01613	0.473	0.27	3034	0.0002485	2.353	0.54	2492	0.01767	2.102	5.5e-05	2560	0.03716	0.873	0.4
exm-rs1859962	17	69108753	rs1859962	G/T	KCNJ2	other/GWAS	11909	0.392852	1.097	0.0011	0.61	3261	0.3026	1.059	0.3	571	0.5248	1.151	0.31	3027	0.2608	0.964	0.55	2491	0.5757	1.267	6.7e-05	2559	0.4929	1.124	0.047
exm1488544	19	49376683	rs45533432	G/A	PPP1R15A	NS	11916	0.00351273	1.935	0.00051	0.00093	3261	0.002097	1.466	0.47	571	0.002481	1.634	0.7	3032	0	NA	NA	2492	0.00384	3.834	0.0001	2560	0.009512	1.352	0.28
exm2257221	5	38264735	rs2006889	G/A	EGFLAM	other	11920	0.499669	0.95	0.069	0.57	3263	0.6223	1.068	0.22	571	0.3275	0.779	0.12	3034	0.3653	0.971	0.61	2492	0.5338	0.796	0.00011	2560	0.5187	0.992	0.89
exm-rs9296015	6	32218989	rs9296015	A/G	NOTCH4	other/GWAS	11920	0.262823	0.968	0.3	0.46	3263	0.2411	0.969	0.61	571	0.2444	0.973	0.86	3034	0.3601	1.103	0.085	2492	0.2308	0.756	0.00011	2560	0.2033	1.004	0.95
exm-rs4959089	6	32219725	rs4959089	G/A	NOTCH4	other/HLA	11920	0.262558	0.968	0.31	0.47	3263	0.2414	0.97	0.62	571	0.2444	0.973	0.86	3034	0.3588	1.107	0.074	2492	0.2308	0.756	0.00011	2560	0.2033	1.001	0.99
exm598221	7	1484418	rs61747084	C/T	MICALL2	NS	11910	0.0616875	0.926	0.23	0.059	3260	0.2069	0.857	0.021	569	0.004975	0.628	0.71	3031	0	NA	NA	2490	0.009615	2.544	0.00011	2560	0.004162	0.746	0.56
exm535225	6	32261153	rs16870005	T/C	C6orf10	NS	11913	0.0167087	0.835	0.099	0.63	3261	0.01841	1.05	0.8	571	0.004963	2.734	0.16	3034	0	NA	NA	2488	0.03888	0.519	0.00018	2559	0.02023	1.162	0.46
exm1490445	19	49899076	rs10405154	G/A	CCDC155	NS	11920	0.492644	0.979	0.43	0.63	3263	0.5107	1.128	0.021	571	0.5955	0.977	0.86	3034	0.4635	0.909	0.084	2492	0.5253	0.805	0.00018	2560	0.4545	1.09	0.14
exm-rs9284813	3	87152169	rs9284813	G/A	VGLL3	other/GWAS	11920	0.235852	1.129	0.00021	0.11	3263	0.3949	0.925	0.16	571	0.1464	1.263	0.21	3034	0.1981	1.336	1e-05	2492	0.1671	1.316	0.00022	2560	0.1528	1.114	0.17
exm630774	7	82785304	rs61738783	A/G	PCLO	NS	11920	0.00563287	1.2	0.29	0.89	3263	0.004427	0.769	0.56	571	0.001241	<0.001	0.65	3034	0.0002485	3.629	0.27	2492	0.002688	4.33	0.00024	2560	0.01694	0.796	0.35
exm451440	5	38527308	rs3729734	A/G	LIFR	NS	11920	0.0184228	1.184	0.078	0.95	3263	0.01491	0.917	0.7	571	0.009926	0.812	0.77	3034	0.000497	<0.001	0.31	2492	0.01843	1.96	0.00025	2560	0.04637	1.008	0.95
exm-rs6910232	6	10902439	rs6910232	G/A	SYCP2L	other/AIMS	11920	0.384626	1.122	0.00013	0.22	3263	0.1761	1.034	0.63	571	0.4603	0.928	0.59	3034	0.6113	1.116	0.058	2492	0.4904	1.244	0.00025	2560	0.2794	1.154	0.026
exm261334	2	210559865	rs35927101	A/G	MAP2	NS	11920	0.0122598	1.186	0.14	0.86	3263	0.006291	1.387	0.29	571	0.009926	0.678	0.64	3034	0	>999.999	0.32	2492	0.009985	2.371	0.00027	2560	0.03686	0.859	0.35
exm1017211	12	58017860	rs113207856	A/G	SLC26A10	ST	11920	0.00145792	1.936	0.024	0.49	3263	0.001631	0.63	0.56	571	0.001241	<0.001	0.63	3034	0	NA	NA	2492	0.000384	16.603	0.00027	2560	0.003864	1.311	0.54
exm1376510	18	13029986	rs116020861	A/G	CEP192	NS	11920	0.00331345	1.476	0.053	0.68	3263	0.001864	0.509	0.38	571	0.001241	2.315	0.6	3034	0	NA	NA	2492	0.004224	3.326	0.00029	2560	0.008918	0.867	0.66
exm1290313	17	7846713	rs35421969	A/G	CNTROB	NS	11894	0.0193227	1.206	0.053	0.018	3256	0.06495	1.136	0.21	571	0	NA	NA	3019	0.001496	0.363	0.33	2491	0.001153	7.098	0.00032	2557	0.00119	1.936	0.36
exm722252	8	134107312	rs73354644	A/G	TG	NS	11919	0.0365854	1.277	0.00085	0.6	3262	0.1203	1.216	0.012	571	0.002481	0.003	0.69	3034	0.0002485	<0.001	0.46	2492	0.009217	2.414	0.00033	2560	0.002675	1.004	0.99
exm2266737	8	67970243	rs6997490	A/G	COPS5	other/AIMS	11920	0.348575	1.073	0.023	0.36	3263	0.1286	0.927	0.42	571	0.6092	1.024	0.88	3034	0.3385	0.969	0.59	2492	0.4627	1.233	0.00035	2560	0.4905	1.107	0.095
exm2267067	10	133608237	rs4897783	G/A	FLJ46300	other	11918	0.47276	1.059	0.036	0.36	3262	0.4369	1.003	0.95	571	0.4702	0.869	0.3	3034	0.5564	1.022	0.7	2491	0.352	1.242	0.00035	2560	0.5125	1.065	0.28
exm573422	6	116574940	rs149060725	T/C	TSPYL4	NS	11920	0.00569914	0.682	0.067	0.066	3263	0.001165	2.195	0.21	571	0.02978	0.28	0.032	3034	0.005716	0.834	0.64	2492	0.006144	0.107	0.00036	2560	0.005351	1.292	0.5
exm1615375	22	43654278	rs73420094	A/G	SCUBE1	NS	11920	0.0229954	0.94	0.52	0.98	3263	0.07339	0.857	0.14	571	0.008685	<0.001	0.16	3034	0	NA	NA	2492	0.004992	3.102	0.00037	2560	0.003567	0.489	0.26
exm-rs4945452	11	80614777	rs4945452	A/G	MIR4300	other	11919	0.417418	1.002	0.93	0.5	3263	0.2978	1.203	0.0012	571	0.5199	1.056	0.69	3034	0.5032	1.071	0.21	2492	0.5626	0.813	0.00041	2559	0.3305	0.918	0.18
exm446468	5	16701796	rs112696559	G/A	MYO10	NS	11920	0.00258449	1.374	0.2	0.15	3263	0.001864	1.598	0.39	571	0.002481	<0.001	0.49	3034	0.0002485	<0.001	0.51	2492	0	>999.999	0.00042	2560	0.008323	0.814	0.55
exm1163929	15	55916703	rs148011047	G/T	PRTG	NS	11920	0.000994036	2.598	0.0034	0.56	3263	0.000932	2.543	0.15	571	0	NA	NA	3034	0	NA	NA	2492	0.000384	15.624	0.00048	2560	0.002973	0.809	0.72
exm2267316	12	6349328	rs2159521	G/A	CD9	other	11920	0.504904	0.957	0.11	0.43	3263	0.5774	1.002	0.97	571	0.3995	1.289	0.071	3034	0.4366	1.034	0.55	2492	0.4981	0.816	0.0005	2560	0.5247	0.922	0.17
exm536912	6	32816772	rs41550019	A/C	TAP1	NS	11920	0.0555335	0.979	0.73	0.3	3263	0.1244	1.097	0.23	571	0.01613	1.05	0.93	3034	0.000497	0.784	0.84	2492	0.06682	0.646	0.00053	2560	0.03419	1.179	0.29
exm694666	8	33246591	rs17855838	C/G	FUT10	NS	11919	0.241649	1.053	0.12	0.59	3263	0.1198	1.053	0.52	571	0.3077	1.142	0.38	3034	0.4212	0.98	0.72	2492	0.1855	1.282	0.00054	2559	0.21	0.931	0.34
exm1376652	18	13057655	rs61740922	T/C	CEP192	NS	11920	0.00762094	1.182	0.25	0.23	3263	0.005592	0.657	0.31	571	0.002481	2.707	0.34	3034	0	NA	NA	2492	0.008065	2.439	0.00054	2560	0.02021	0.827	0.4
exm2267806	15	92139237	rs4383118	G/A	SLCO3A1	other	11918	0.490456	0.98	0.46	0.54	3263	0.4702	0.968	0.54	571	0.3623	0.896	0.45	3032	0.6134	1.007	0.9	2492	0.5829	0.814	0.00058	2560	0.3285	1.159	0.017
exm-rs6029526	20	39672618	rs6029526	T/A	TOP1	other/GWAS	11919	0.339298	0.927	0.014	0.78	3262	0.2381	0.957	0.5	571	0.4591	0.884	0.39	3034	0.1484	0.97	0.7	2492	0.5142	0.819	0.00058	2560	0.5327	1	1
exm-rs4466137	5	82985739	rs4466137	T/G	HAPLN1	other/GWAS	11919	0.204533	0.923	0.018	0.66	3263	0.1836	0.928	0.27	571	0.1104	1.054	0.81	3034	0.174	0.99	0.89	2492	0.2796	0.797	0.00059	2559	0.2323	1.003	0.96
exm1236497	16	31391887	rs59889488	T/C	ITGAX	NS	11920	0.0110007	0.977	0.86	0.29	3263	0.03472	1.112	0.45	571	0	NA	NA	3034	0	NA	NA	2492	0.006144	0.113	0.0006	2560	0.0002973	1.167	0.93
exm536876	6	32814942	rs1057149	T/C	TAP1	NS	11920	0.0552021	0.985	0.81	0.3	3263	0.1235	1.106	0.19	571	0.01613	1.05	0.93	3034	0.000497	0.784	0.84	2492	0.06644	0.648	0.00061	2560	0.03419	1.179	0.29
exm1373735	18	7008591	rs662471	C/T	LAMA1	NS	11919	0.168743	1.02	0.6	0.59	3262	0.2455	0.947	0.38	571	0.1216	1.104	0.66	3034	0.001988	1.635	0.4	2492	0.1713	1.287	0.00065	2560	0.2797	0.906	0.14
exm1513688	19	58004563	rs7259303	A/G	ZNF419	NS	11920	0.00695825	1.504	0.0054	0.45	3263	0.004194	1.593	0.21	571	0.003722	0.943	0.96	3034	0.0002485	<0.001	0.58	2492	0.00768	2.511	0.00065	2560	0.01873	1.111	0.62
exm1063936	13	38156538	rs117103342	T/C	POSTN	NS	11920	0.00291584	0.56	0.044	0.95	3263	0.001631	0.901	0.88	571	0.001241	<0.001	0.69	3034	0	NA	NA	2492	0.006912	0.118	0.00066	2560	0.005351	1.157	0.71
exm157274	1	229594003	rs41307728	T/C	NUP133	NS	11920	0.0217362	1.186	0.041	0.34	3263	0.0226	0.787	0.2	571	0.004963	<0.001	0.18	3034	0	NA	NA	2492	0.07527	1.41	0.00068	2560	0.009215	0.799	0.52
exm372186	3	189607152	rs148076109	A/C	TP63	NS	11920	0.00145792	2.199	0.0046	0.8	3263	0.000233	4.592	0.18	571	0.001241	1.868	0.67	3034	0	NA	NA	2492	0.00192	4.8	0.00068	2560	0.004459	1.031	0.95
exm2272656	18	31328519	rs12957087	T/C	ASXL3	other	11920	0.498741	0.947	0.051	0.89	3263	0.3616	1.01	0.86	571	0.6687	1.052	0.74	3034	0.6508	0.974	0.65	2492	0.5595	0.821	0.00068	2560	0.404	0.972	0.64
exm207890	2	86260785	rs78239085	T/C	POLR1A	SP	11911	0.0415893	1.149	0.053	0.22	3263	0.003495	1.571	0.24	571	0.02854	0.784	0.61	3027	0.1423	1.069	0.39	2492	0.00192	4.978	0.00069	2558	0.003867	2.436	0.011
exm917262	11	61908440	rs2277283	C/T	INCENP	NS	11916	0.183506	1.083	0.024	0.5	3262	0.1876	0.932	0.31	571	0.263	0.933	0.68	3032	0.08657	1.094	0.34	2492	0.1478	1.301	0.00074	2559	0.3028	1.103	0.12
exm-rs314530	13	89921892	rs314530	C/A	MIR622	other/AIMS	11920	0.40285	0.973	0.42	0.11	3263	0.2943	1.124	0.042	571	0.5099	0.909	0.54	3034	0.8042	1.058	0.43	2492	0.3506	0.805	0.00076	2560	0.0761	0.876	0.28
exm446368	5	16676247	rs61744227	A/G	MYO10	NS	11919	0.00284995	1.554	0.052	0.44	3263	0.002097	1.43	0.5	571	0.002481	2.279	0.5	3034	0	>999.999	0.25	2492	0.000384	14.496	0.00078	2559	0.009221	0.979	0.95
exm62529	1	55464986	rs34561376	A/G	BSND	NS	11920	0.0831014	0.981	0.72	0.59	3263	0.1191	0.956	0.59	571	0.08313	0.647	0.11	3034	0.1556	1.092	0.24	2492	0.01075	0.272	0.0008	2560	0.00654	0.868	0.72
exm103395	1	153934820	rs61755890	T/C	SLC39A1	NS	11918	0.000132573	5.608	0.015	0.45	3263	0	NA	NA	571	0	NA	NA	3032	0	NA	NA	2492	0	>999.999	0.0008	2560	0.0005945	<0.001	0.3
exm-rs1697421	1	21823292	rs1697421	A/G	NBPF3	other/GWAS	11920	0.377999	0.982	0.53	0.32	3263	0.1568	1.121	0.12	571	0.3983	0.778	0.08	3034	0.4018	1.089	0.13	2492	0.5242	0.824	0.00082	2560	0.5137	0.982	0.77
exm1357313	17	74076415	rs2257020	G/A	ZACN	NS	11907	0.453521	1.009	0.76	0.92	3260	0.3794	0.943	0.28	571	0.4851	0.871	0.31	3029	0.5231	1.037	0.51	2490	0.505	1.217	0.00082	2557	0.4173	0.898	0.076
exm-rs2562456	19	21666210	rs2562456	G/A	LOC400680	other/GWAS	11910	0.265022	1.051	0.11	0.76	3256	0.1565	1.083	0.26	571	0.3462	1.083	0.58	3034	0.3683	0.946	0.33	2489	0.2633	1.243	0.00085	2560	0.2616	1.014	0.83
exm-rs7757648	6	30851933	rs7757648	A/G	DDR1	other/HLA	11920	0.0225977	0.794	0.016	0.52	3263	0.03075	0.874	0.4	571	0.004963	0.8	0.81	3034	0.0002485	1.401	0.82	2492	0.04762	0.6	0.00086	2560	0.02378	1.044	0.82
exm-rs926070	6	32257566	rs926070	C/T	C6orf10	other/HLA	11920	0.284095	0.978	0.47	0.73	3263	0.3239	1.016	0.78	571	0.2035	1.073	0.69	3034	0.2289	1.103	0.13	2492	0.2903	0.801	0.00088	2560	0.3139	1	1
exm2267553	13	85555284	rs1932917	G/A	SLITRK6	other	11825	0.442733	1.055	0.057	0.91	3258	0.4956	1.101	0.067	570	0.6452	0.875	0.39	2960	0.4421	0.986	0.81	2477	0.3571	1.221	0.00088	2560	0.3936	0.982	0.76
exm250297	2	182543455	rs1801262	T/C	NEUROD1	NS	11914	0.234019	0.957	0.18	0.92	3258	0.2603	1.109	0.076	571	0.1836	1.041	0.83	3034	0.0743	1.014	0.9	2491	0.2909	0.808	0.0009	2560	0.3597	0.932	0.27
exm825665	10	55581779	rs79854148	C/T	PCDH15	NS	11920	0.0338635	1.002	0.98	0.51	3263	0.1116	1.059	0.49	571	0	NA	NA	3034	0	NA	NA	2492	0.009985	0.257	0.0009	2560	0.001784	0.676	0.65
exm-rs3132959	6	32298942	rs3132959	G/A	C6orf10	other/HLA	11920	0.18224	0.937	0.077	0.52	3263	0.2903	0.985	0.8	571	0.1228	1.09	0.67	3034	0.01367	1.29	0.25	2492	0.2235	0.787	0.00092	2560	0.2283	0.995	0.94
exm1290319	17	7846836	rs78236778	T/A	CNTROB	NS	11920	0.0113983	0.811	0.11	0.31	3263	0.005825	1.492	0.21	571	0.01117	0.193	0.1	3034	0.0002485	<0.001	0.47	2492	0.02189	0.455	0.00092	2560	0.02378	1.059	0.76
exm1082461	13	114507886	rs139045071	T/C	FAM70B	NS	11920	0.00185553	1.624	0.078	0.64	3263	0.002796	0.332	0.13	571	0.002481	0.887	0.92	3034	0	NA	NA	2492	0	>999.999	0.00094	2560	0.004162	1.774	0.13
exm294714	3	17349498	rs79960281	C/T	TBC1D5	NS	11920	0.00808482	1.408	0.012	0.28	3263	0.005359	0.993	0.99	571	0.002481	3.169	0.21	3034	0.0002485	<0.001	0.35	2492	0.009217	2.29	0.00097	2560	0.0214	1.16	0.45
exm502920	5	169680139	rs34192428	C/G	LCP2	NS	11918	0.0083499	1.297	0.059	0.87	3262	0.006291	0.865	0.69	571	0.006203	2.165	0.23	3034	0.0002485	<0.001	0.47	2492	0.008833	2.32	0.00097	2559	0.02081	0.93	0.73
exm-rs3132958	6	32297901	rs3132958	A/G	C6orf10	other/HLA	11917	0.181493	0.934	0.065	0.46	3261	0.2882	0.979	0.72	570	0.1228	1.036	0.86	3034	0.01367	1.29	0.25	2492	0.2231	0.788	0.00099	2560	0.228	0.997	0.96
exm2267647	14	41855338	rs12434244	A/G	LRFN5	other	11920	0.487011	0.946	0.045	0.31	3263	0.4254	1.001	0.99	571	0.6563	1.181	0.27	3034	0.4505	0.968	0.55	2492	0.5649	0.822	0.001	2560	0.5083	0.962	0.51
exm1251094	16	68056703	rs145119741	A/G	DDX28	NS	11919	0.0110669	1.386	0.0027	0.9	3263	0.003728	0.833	0.68	571	0.001241	<0.001	0.66	3034	0	>999.999	0.091	2491	0.05607	1.463	0.001	2560	0.001189	2.246	0.27
exm154625	1	227946805	rs143092410	T/C	SNAP47	NS	11920	0.00165673	0.343	0.016	0.37	3263	0.001165	0.384	0.37	571	0.001241	1.594	0.76	3034	0	NA	NA	2492	0.004224	0.071	0.0011	2560	0.002378	0.735	0.65
exm-rs6904320	6	32312082	rs6904320	A/G	C6orf10	other/HLA	11920	0.228231	0.962	0.24	0.32	3263	0.2938	0.999	0.99	571	0.2233	1.073	0.66	3034	0.1441	1.087	0.28	2492	0.2439	0.797	0.0011	2560	0.2342	0.997	0.97
exm-rs3129931	6	32335516	rs3129931	C/T	C6orf10	other/HLA	11920	0.181577	0.937	0.075	0.43	3263	0.2884	0.978	0.71	571	0.1228	1.09	0.67	3034	0.01392	1.31	0.22	2492	0.2227	0.789	0.0011	2560	0.228	0.997	0.96
exm535341	6	32337686	rs3129941	A/G	C6orf10	NS	11920	0.181577	0.937	0.075	0.43	3263	0.2884	0.978	0.71	571	0.1228	1.09	0.67	3034	0.01392	1.31	0.22	2492	0.2227	0.789	0.0011	2560	0.228	0.997	0.96
exm547465	6	42858524	rs61732354	T/C	C6orf226	NS	11919	0.0151093	0.775	0.034	0.74	3263	0.01654	0.734	0.17	571	0.008685	0.731	0.7	3034	0	NA	NA	2491	0.01959	0.443	0.0011	2560	0.02943	1.06	0.74
exm2257495	6	123126138	rs61741159	C/T	SMPDL3A	S	11919	0.0568001	1.086	0.15	0.77	3263	0.02213	0.977	0.9	571	0.01365	1.747	0.27	3034	0.07977	0.832	0.089	2491	0.151	1.298	0.0011	2560	0.011	1.036	0.91
exm771338	9	113132221	rs17204533	A/G	SVEP1	NS	11918	0.159531	1.089	0.025	0.98	3263	0.04334	1.071	0.6	571	0.2419	0.976	0.87	3034	0.3022	1.045	0.46	2491	0.1172	1.322	0.0011	2559	0.1501	1.041	0.62
exm815198	10	25312895	rs34929144	A/C	THNSL1	NS	11919	0.0197482	1.246	0.013	0.036	3262	0.008621	1.014	0.96	571	0.009926	0.407	0.4	3034	0	>999.999	0.14	2492	0.04839	1.497	0.0011	2560	0.03775	1.024	0.88
exm831238	10	72298745	rs117244352	T/C	KIAA1274	NS	11920	0.00304838	1.483	0.072	0.1	3263	0.001631	1.262	0.72	571	0.002481	0.58	0.67	3034	0.0002485	<0.001	0.43	2492	0.00192	4.573	0.0011	2560	0.009215	0.981	0.95
exm2271545	11	99415903	rs12290702	G/T	CNTN5	other	11919	0.459305	0.964	0.19	0.82	3263	0.5895	1.055	0.32	570	0.2612	0.977	0.88	3034	0.3849	0.986	0.8	2492	0.3813	0.821	0.0011	2560	0.4899	0.971	0.62
exm1216698	16	9858173	rs61758995	T/G	GRIN2A	NS	11920	0.00258449	0.78	0.39	0.98	3263	0.001398	0.936	0.93	571	0.003722	1.708	0.59	3034	0	NA	NA	2492	0.004224	<0.001	0.0011	2560	0.005648	1.327	0.43
exm-rs6761	17	7417663	rs6761	C/T	POLR2A	other/GWAS	11920	0.470245	1.024	0.4	0.86	3263	0.555	0.946	0.29	571	0.5186	1.113	0.44	3034	0.5234	0.93	0.19	2492	0.3533	1.218	0.0011	2560	0.3775	1.067	0.29
exm1340054	17	56389516	rs144106922	T/C	BZRAP1	NS	11920	0.000463883	3.074	0.011	0.52	3263	0.000466	<0.001	0.23	571	0.001241	<0.001	0.61	3034	0	NA	NA	2492	0	>999.999	0.0011	2560	0.001189	2.212	0.23
exm1468238	19	40901011	rs3745202	C/G	PRX	NS	11901	0.0835765	0.952	0.34	0.5	3263	0.05126	1.288	0.029	571	0.16	0.771	0.19	3018	0.0132	1.069	0.78	2491	0.1015	0.712	0.0011	2558	0.1768	0.998	0.98
exm1541317	20	39797465	rs753381	T/C	PLCG1	NS	11920	0.265606	0.953	0.15	0.85	3263	0.1104	1.14	0.14	571	0.433	0.857	0.28	3034	0.1454	0.979	0.79	2492	0.4159	0.823	0.0011	2560	0.451	1.003	0.96
exm83510	1	111854895	rs41282494	A/G	CHIA	NS	11919	0.104573	0.96	0.37	0.16	3263	0.1932	1.016	0.81	571	0.04094	1.059	0.87	3034	0.001988	0.227	0.14	2492	0.1118	0.73	0.0012	2559	0.124	1.111	0.23
exm326819	3	58512353	NA	C/T	ACOX2	NS	11920	0.000994036	0.138	0.0022	0.64	3263	0	NA	NA	571	0	NA	NA	3034	0	NA	NA	2492	0.00576	0.125	0.0012	2560	0	NA	NA
exm338382	3	113165480	rs57006145	G/T	SPICE1	NS	11920	0.0363154	1.05	0.51	0.76	3263	0.03029	1.069	0.66	571	0.01365	1.702	0.32	3034	0.06958	0.927	0.49	2492	0.01229	2.052	0.0012	2560	0.02824	0.795	0.23
exm-rs3129904	6	32310396	rs3129904	A/G	C6orf10	other/HLA	11920	0.214579	0.952	0.15	0.36	3263	0.2887	0.977	0.7	571	0.1452	1.081	0.68	3034	0.1315	1.087	0.3	2492	0.2235	0.792	0.0012	2560	0.2292	0.99	0.88
exm561051	6	74491002	rs7742662	T/G	CD109	NS	11919	0.0269088	1.118	0.19	0.6	3262	0.08625	1.055	0.56	571	0.001241	<0.001	0.34	3034	0.00671	0.662	0.29	2492	0.003072	3.456	0.0012	2560	0	>999.999	0.01
exm580957	6	136683810	rs113337066	A/G	MAP7	NS	11917	0.0257192	1.158	0.073	0.34	3263	0.01072	0.902	0.69	571	0.01117	0.64	0.58	3032	0.05995	0.989	0.92	2491	0.03149	1.634	0.0012	2560	0.002973	1.684	0.28
exm712927	8	101196856	rs35305781	C/G	SPAG1	SP	11920	0.00682571	0.891	0.51	0.15	3263	0.0233	0.72	0.086	571	0.001241	<0.001	0.54	3034	0	NA	NA	2492	0.000384	14.1	0.0012	2560	0.0002973	2.067	0.61
exm1104204	14	58605734	rs61741497	C/T	C14orf37	NS	11920	0.00304838	0.925	0.76	0.24	3263	0.001864	0.545	0.44	571	0.003722	<0.001	0.25	3034	0	>999.999	0.18	2492	0.006144	0.161	0.0012	2560	0.005648	2.031	0.026
exm534983	6	32168996	rs8192573	G/C	NOTCH4	NS	11876	0.0189781	0.851	0.11	0.2	3263	0.0198	0.988	0.95	571	0.003722	4.118	0.056	2990	0.0002498	<0.001	0.43	2492	0.04647	0.61	0.0013	2560	0.02259	1.139	0.5
exm692013	8	27457479	rs9331938	T/C	CLU	NS	11859	0.0100452	0.958	0.76	0.88	3243	0.02998	1.123	0.44	571	0.002481	<0.001	0.44	3003	0	NA	NA	2489	0.005765	0.126	0.0013	2553	0.001788	0.951	0.95
exm769387	9	108234207	rs28503319	G/A	FSD1L	NS	11912	0.0153887	1.195	0.089	0.11	3263	0.009553	1.587	0.057	570	0.008706	3.02	0.044	3028	0.0004985	<0.001	0.16	2491	0.01613	1.885	0.0013	2560	0.04162	0.766	0.095
exm1017408	12	58112155	rs34764811	T/C	OS9	NS	11919	0.0183565	1.204	0.065	0.37	3263	0.06244	1.12	0.28	571	0	NA	NA	3033	0	NA	NA	2492	0.001536	5.13	0.0013	2560	0.001486	0.765	0.75
exm1406583	19	3624005	rs55862054	A/G	C19orf29	NS	11920	0.0377734	0.846	0.027	0.77	3263	0.02796	0.878	0.44	571	0.02854	0.637	0.34	3034	0.0007455	0.724	0.79	2492	0.05991	0.648	0.0013	2560	0.07967	0.995	0.97
exm1494815	19	51016200	rs116995433	T/C	ASPDH	NS	11920	0.00662691	1.044	0.8	0.063	3263	0.004194	0.473	0.17	571	0.006203	0.282	0.25	3034	0	NA	NA	2492	0.00192	4.552	0.0013	2560	0.0214	0.905	0.63
exm299513	3	37670679	rs61751189	A/G	ITGA9	SP	11919	0.00139183	1.622	0.13	0.78	3263	0.001165	0.459	0.47	571	0	NA	NA	3034	0	NA	NA	2491	0	>999.999	0.0014	2560	0.004756	1.06	0.89
exm580958	6	136683828	rs80342066	G/A	MAP7	NS	11920	0.0315441	1.159	0.048	0.56	3263	0.02982	1.052	0.74	571	0.01117	0.64	0.58	3034	0.06039	0.981	0.87	2492	0.03303	1.609	0.0014	2560	0.002973	2.111	0.096
S3.6 Native Hawaiians
							Overall					African American				Native Hawaiian				Japanese American				Latino				European American
SNP	Chr	Position	SNP ID	A1/A2	Gene	Type	No. of samples	MAF	OR	P	P_Het	No. of samples	MAF	OR	P	No. of samples	MAF	OR	P	No. of samples	MAF	OR	P	No. of samples	MAF	OR	P	No. of samples	MAF	OR	P
exm-rs16901979	8	128124916	rs16901979	A/C	PCAT1	other/GWAS	11920	0.177999	1.473	6.2e-25	0.7	3263	0.3847	1.36	1.1e-08	571	0.1216	2.386	4.9e-07	3034	0.1774	1.516	4.1e-10	2492	0.03533	1.767	5.4e-05	2560	0.03894	1.303	0.065
exm-rs1447295	8	128485038	rs1447295	A/C	LOC727677	other/GWAS	11920	0.17674	1.327	9.9e-16	0.88	3263	0.2912	1.141	0.02	571	0.1998	2.109	2.2e-06	3034	0.173	1.417	4e-07	2492	0.08525	1.566	1.9e-06	2560	0.1005	1.258	0.012
exm-rs4242384	8	128518554	rs4242384	C/A	LOC727677	other/GWAS	11920	0.127104	1.436	6.8e-21	0.48	3263	0.1328	1.241	0.0034	571	0.1935	2.056	5.7e-06	3034	0.1638	1.526	8.6e-10	2492	0.07796	1.664	1.6e-07	2560	0.0981	1.258	0.013
exm-rs2456449	8	128192981	rs2456449	G/A	PCAT1	other/GWAS	11920	0.319417	1.027	0.37	0.53	3263	0.2004	1.065	0.33	571	0.5645	0.522	8.1e-06	3034	0.3551	0.982	0.75	2492	0.3533	1.139	0.028	2560	0.3436	1.064	0.32
exm676252	7	157931144	rs1130499	T/C	PTPRN2	NS	11917	0.429291	1.012	0.68	0.32	3263	0.4362	1.015	0.77	571	0.4491	1.886	9.1e-06	3033	0.5087	1.003	0.95	2490	0.4439	1.003	0.96	2560	0.3095	0.903	0.12
exm-rs7837688	8	128539360	rs7837688	T/G	LOC727677	other/GWAS	11920	0.097283	1.51	6.8e-22	0.17	3263	0.05638	1.349	0.0043	571	0.1787	2.008	1.1e-05	3034	0.1461	1.564	5.5e-10	2492	0.06682	1.745	1e-07	2560	0.09512	1.264	0.012
exm-rs4242382	8	128517573	rs4242382	A/G	LOC727677	other/GWAS	11920	0.176342	1.349	1.3e-17	0.91	3263	0.2917	1.11	0.069	571	0.2035	1.976	1.5e-05	3034	0.1667	1.533	4.6e-10	2492	0.08986	1.651	3.9e-08	2560	0.1011	1.254	0.013
exm1411704	19	5590371	rs150472516	T/C	SAFB2	NS	11920	0.00178926	1.53	0.14	0.23	3263	0.000932	1.546	0.57	571	0	>999.999	2.5e-05	3034	0	NA	NA	2492	0.001536	1.41	0.61	2560	0.005648	0.917	0.83
exm-rs10505477	8	128407443	rs10505477	C/T	POU5F1B	other/GWAS	11919	0.460631	0.861	4.4e-07	0.85	3263	0.2104	0.86	0.028	571	0.7097	0.544	4.3e-05	3034	0.6814	0.84	0.0024	2492	0.4105	0.856	0.0089	2559	0.4949	0.942	0.31
exm973113	12	662873	rs148059237	T/C	B4GALNT3	NS	11920	0.0109344	1.049	0.71	0.9	3263	0.006058	1.433	0.24	571	0.002481	14.867	4.6e-05	3034	0	NA	NA	2492	0.01843	0.826	0.39	2560	0.02646	0.904	0.59
exm-rs6983267	8	128413305	rs6983267	T/G	POU5F1B	other/GWAS	11920	0.436912	0.857	3.9e-07	0.87	3263	0.1493	0.807	0.0093	571	0.7072	0.545	5e-05	3034	0.6762	0.837	0.0019	2492	0.394	0.857	0.011	2560	0.486	0.954	0.42
exm-rs12653946	5	1895829	rs12653946	T/C	IRX4	other/GWAS	11919	0.433059	1.15	4.1e-07	0.9	3263	0.4	1.142	0.013	571	0.3772	1.73	5.8e-05	3034	0.4456	1.289	6.8e-06	2492	0.4858	1.046	0.45	2559	0.4328	1.072	0.24
exm-rs13074924	3	174029045	rs13074924	A/G	NLGN1	other/GWAS	11920	0.280848	1.03	0.35	0.47	3263	0.4143	1.002	0.97	571	0.1489	1.975	0.0001	3034	0.1166	1.053	0.54	2492	0.2619	1.058	0.39	2560	0.3534	0.944	0.35
exm57602	1	47726087	rs13376679	C/T	STIL	NS	11920	0.170709	0.964	0.33	0.42	3263	0.2116	1.025	0.7	571	0.1501	0.386	0.00013	3034	0.00994	1.27	0.37	2492	0.1886	0.985	0.84	2560	0.302	0.915	0.18
exm2266689	8	124526607	rs2294088	A/G	FBXO32	other	11919	0.443141	0.997	0.93	0.48	3262	0.4562	0.912	0.082	571	0.3548	0.555	0.00014	3034	0.5957	1.049	0.39	2492	0.4455	1.115	0.062	2560	0.2634	1.018	0.79
exm2264565	15	75393720	rs8040061	A/C	PPCDC	other	11918	0.44876	0.979	0.45	0.49	3263	0.3984	1.019	0.72	571	0.5385	0.569	0.00014	3033	0.59	1.002	0.97	2492	0.3975	0.905	0.095	2559	0.3623	1.066	0.3
exm-rs1456315	8	128103937	rs1456315	G/A	PCAT1	other/GWAS	11920	0.498343	0.762	8.6e-22	0.3	3263	0.4811	0.866	0.007	571	0.5161	0.586	0.00016	3034	0.341	0.613	4.4e-15	2492	0.5246	0.835	0.0017	2560	0.684	0.764	1.3e-05
exm2269938	4	87924979	rs340639	T/C	AFF1	other/AIMS	11919	0.483961	1.043	0.18	0.39	3263	0.7961	1.034	0.67	571	0.2705	1.722	0.00021	3034	0.46	1.043	0.45	2492	0.3637	0.969	0.61	2559	0.2585	1.003	0.96
exm2254185	20	210061	rs13045643	A/G	DEFB129	S	11917	0.283139	1.02	0.52	0.27	3263	0.1137	0.944	0.52	571	0.366	1.701	0.00023	3032	0.267	1.006	0.92	2492	0.3829	1.031	0.6	2559	0.4215	0.995	0.94
exm441836	5	1225626	rs7728667	T/A	SLC6A18	NS	11920	0.249569	1.007	0.82	0.57	3263	0.1873	0.939	0.36	571	0.2407	1.755	0.00025	3034	0.3559	0.945	0.33	2492	0.2231	1.056	0.42	2560	0.2244	1.009	0.9
exm2255141	22	36537725	rs61731692	A/G	APOL3	S	11920	0.0774685	1.032	0.54	0.39	3263	0.08434	1.033	0.73	571	0.05707	2.401	0.00031	3034	0.003728	2.09	0.046	2492	0.09332	0.969	0.76	2560	0.1495	0.954	0.58
exm233166	2	152499355	rs76767949	C/T	NEB	NS	11918	0.0248542	0.806	0.033	0.84	3262	0.000233	<0.001	0.5	571	0.1774	0.455	0.00032	3033	0.04873	0.913	0.49	2492	0.01114	1.108	0.71	2560	0.001784	0.913	0.9
exm1221502	16	19041595	rs28583298	G/A	TMC7	NS	11919	0.430276	0.941	0.047	0.54	3263	0.7384	0.965	0.56	571	0.3127	0.56	0.00032	3033	0.2031	0.988	0.86	2492	0.3771	0.883	0.039	2560	0.3781	1.006	0.92
exm2252436	16	1260481	rs8063574	T/C	CACNA1H	S	11919	0.100477	0.999	0.98	0.17	3263	0.09856	0.943	0.51	571	0.05583	2.437	0.00033	3034	0.000994	0.79	0.8	2492	0.1578	0.97	0.71	2559	0.1883	0.974	0.73
exm2268923	1	108523670	rs12121990	G/T	VAV3	other/AIMS	11919	0.389515	0.939	0.044	0.22	3263	0.7139	0.933	0.25	571	0.3139	0.564	0.00035	3033	0.2345	0.948	0.42	2492	0.2577	1.008	0.91	2560	0.2812	0.957	0.51
exm2252228	1	56035952	rs6658576	C/T	MIR4422	other	11919	0.476143	0.993	0.8	0.74	3263	0.4247	0.98	0.71	571	0.5012	0.6	0.00039	3034	0.4583	1.071	0.21	2492	0.5595	1.02	0.74	2559	0.4926	0.967	0.56
exm608588	7	21765452	rs12536928	T/C	DNAH11	ST	11913	0.355001	0.989	0.71	0.53	3263	0.2943	0.981	0.75	571	0.2531	0.519	0.00039	3032	0.2507	1.063	0.33	2489	0.4438	1.033	0.57	2558	0.5131	0.938	0.27
exm1422498	19	9237457	rs118114660	T/G	OR7G3	NS	11910	0.0233453	1.145	0.15	0.62	3259	0.01307	0.674	0.13	570	0.09701	2.115	0.00045	3030	0.051	1.123	0.34	2492	0.001536	1.773	0.38	2559	0.002675	0.582	0.42
exm260073	2	207631446	rs147727753	C/G	FASTKD2	NS	11920	0.00271703	1.002	0.99	0.6	3263	0.00233	0.208	0.099	571	0	>999.999	0.00047	3034	0	NA	NA	2492	0.003456	0.53	0.25	2560	0.00654	1.458	0.25
exm1594803	22	25010855	rs186765281	G/A	GGT1	NS	11919	0.00715801	1.189	0.25	0.19	3263	0.004194	0.996	0.99	571	0.001241	21.553	0.00054	3034	0.0002485	2.392	0.54	2492	0.01152	1.216	0.46	2559	0.01725	1.038	0.87
exm840484	10	91066075	rs2070845	G/A	IFIT2	NS	11919	0.219777	1.022	0.51	0.093	3262	0.2648	1.009	0.87	571	0.09801	2.074	0.00055	3034	0.1817	0.994	0.93	2492	0.2055	1.033	0.65	2560	0.2482	0.994	0.93
exm436242	4	184930646	rs61730738	A/G	STOX2	NS	11920	0.020941	1.039	0.67	0.45	3263	0.01095	0.956	0.86	571	0.001241	19.119	0.00056	3034	0	NA	NA	2492	0.05492	1.054	0.68	2560	0.03716	0.972	0.86
exm1128005	14	102391577	rs3742424	C/G	PPP2R5C	NS	11915	0.211814	1.02	0.56	0.56	3262	0.2745	0.98	0.73	568	0.1608	1.765	0.00056	3033	0.314	0.96	0.49	2492	0.1271	1.039	0.66	2560	0.0874	1.088	0.41
exm66733	1	67109277	rs17490057	C/G	SGIP1	NS	11920	0.0212061	0.971	0.75	0.74	3263	0.01305	1.001	1	571	0.009926	5.097	0.0006	3034	0.0002485	<0.001	0.53	2492	0.02611	0.587	0.01	2560	0.05559	1.096	0.46
exm2272945	20	61391977	rs746192	G/T	NTSR1	other/AIMS	11920	0.300199	0.958	0.26	0.34	3263	0.7258	0.946	0.38	571	0.165	0.471	0.00064	3034	0.1138	0.984	0.85	2492	0.1229	1.15	0.11	2560	0.1498	0.871	0.11
exm223450	2	120125058	rs3731607	T/C	DBI	NS	11918	0.193863	1.008	0.82	0.58	3263	0.1363	1.035	0.65	571	0.1811	0.489	0.00068	3034	0.2674	1.075	0.24	2491	0.1782	0.978	0.76	2559	0.1945	1.018	0.81
exm-rs11018874	11	89875437	rs11018874	A/G	NAALAD2	other/GWAS	11918	0.159046	0.985	0.7	0.5	3262	0.03075	0.872	0.41	570	0.07692	2.314	0.00068	3034	0.2609	0.98	0.74	2492	0.3161	1.001	0.99	2560	0.09899	0.902	0.32
exm233298	2	152521983	rs117271684	G/A	NEB	NS	11920	0.0247184	0.811	0.038	0.95	3263	0.000233	<0.001	0.5	571	0.1749	0.476	0.00069	3034	0.04896	0.921	0.53	2492	0.01114	1.047	0.87	2560	0.001486	1.1	0.9
exm1986597	2	152534545	rs117048449	C/T	NEB	NS	11920	0.0247846	0.814	0.04	0.92	3263	0.000233	<0.001	0.5	571	0.1749	0.476	0.00069	3034	0.04896	0.921	0.53	2492	0.01152	1.069	0.8	2560	0.001486	1.1	0.9
exm-rs2833556	21	33285300	rs2833556	A/G	HUNK	other/GWAS	11919	0.346964	0.997	0.92	0.44	3263	0.5312	1.005	0.93	571	0.4814	0.614	0.0007	3034	0.3385	1.007	0.91	2492	0.197	1.081	0.28	2559	0.2058	1.038	0.61
exm2061282	3	93598157	rs76877671	G/A	PROS1	SP	11920	0.00324718	1.179	0.48	0.41	3263	0	NA	NA	571	0	>999.999	0.00073	3034	0.01218	1.005	0.98	2492	0	NA	NA	2560	0	NA	NA
exm741897	9	19290794	rs41269019	C/A	DENND4C	NS	11920	0.0121935	1.077	0.54	0.66	3263	0.007223	1.085	0.79	571	0.001241	17.902	0.00073	3034	0.0002485	<0.001	0.22	2492	0.01805	1.007	0.97	2560	0.03092	1.013	0.94
exm2267005	10	67894481	rs7895803	A/G	CTNNA3	other	11920	0.490855	0.989	0.68	0.12	3263	0.5524	0.966	0.51	571	0.4206	0.611	0.00076	3034	0.3981	1.022	0.69	2492	0.6022	1.027	0.65	2560	0.4539	1.052	0.39
exm2011320	22	39813759	rs35469986	C/T	TAB1	NS	11920	0.0296223	1.185	0.046	0.52	3263	0.007456	0.981	0.95	571	0.1551	1.842	0.00077	3034	0.06983	1.126	0.27	2492	0.000768	0.338	0.36	2560	0.002081	0.747	0.7
exm55110	1	45808863	rs9429157	A/G	TOE1	NS	11920	0.0129225	1.018	0.88	0.47	3263	0.009087	1.01	0.97	571	0.004963	7.668	0.00079	3034	0.0002485	<0.001	0.49	2492	0.01459	0.968	0.89	2560	0.03359	0.978	0.89
exm605950	7	11446658	rs61996269	G/A	THSD7A	NS	11920	0.000530152	0.785	0.72	0.36	3263	0.000466	<0.001	0.34	571	0	>999.999	0.00083	3034	0	NA	NA	2492	0.000384	1.773	0.69	2560	0.001486	<0.001	0.12
exm614489	7	36492159	rs141247770	G/A	ANLN	NS	11920	0.00152419	1.273	0.45	0.88	3263	0.002097	0.412	0.24	571	0	>999.999	0.00083	3034	0	NA	NA	2492	0.00192	1.828	0.29	2560	0.002675	1.287	0.63
exm767769	9	104171770	rs61755102	A/G	ZNF189	NS	11920	0.00159046	1.146	0.67	0.99	3263	0.000932	2.482	0.17	571	0	>999.999	0.00083	3034	0	NA	NA	2492	0.002688	0.592	0.4	2560	0.003864	0.872	0.78
exm1173686	15	71305225	rs150157186	A/G	LRRC49	NS	11920	0.00205434	1.207	0.5	0.67	3263	0.001165	0.401	0.39	571	0	>999.999	0.00086	3034	0	>999.999	0.23	2492	0.004224	1.189	0.69	2560	0.004459	0.769	0.59
exm2268108	18	53640779	rs1424401	G/A	LOC100505474	other	11920	0.456594	1.057	0.048	0.78	3263	0.5755	1.005	0.92	571	0.3114	1.679	0.00086	3034	0.544	1.032	0.56	2492	0.3299	1.07	0.28	2560	0.3332	1.082	0.21
exm-rs1490157	3	21719246	rs1490157	C/T	ZNF385D	other/GWAS	11858	0.303048	0.967	0.27	0.18	3256	0.3723	0.982	0.73	569	0.3504	0.596	0.00089	3006	0.2946	0.998	0.98	2481	0.2334	1.085	0.22	2546	0.2672	0.89	0.085
exm1336673	17	48628160	rs62621401	G/A	SPATA20	NS	11920	0.0722333	1.048	0.37	0.3	3263	0.08038	1.127	0.19	571	0.1017	2.003	0.00089	3034	0.02908	0.842	0.33	2492	0.1793	0.987	0.86	2560	0.02348	0.981	0.92
exm607933	7	20698270	rs2301641	G/A	ABCB5	NS	11918	0.356508	0.928	0.013	0.085	3263	0.5517	0.87	0.0093	571	0.1749	0.484	0.00096	3033	0.2321	0.976	0.71	2492	0.3326	0.978	0.72	2559	0.3183	0.954	0.47
exm572436	6	111901465	rs146226365	T/G	TRAF3IP2	NS	11919	0.000596421	1.579	0.35	0.26	3262	0	NA	NA	571	0	>999.999	0.00099	3034	0	NA	NA	2492	0.000768	<0.001	0.23	2560	0.002081	1.564	0.42
exm1280950	17	4541963	rs61119773	C/T	ALOX15	NS	11920	0.00165673	1.081	0.81	0.95	3263	0.003961	0.71	0.45	571	0	>999.999	0.00099	3034	0.0002485	<0.001	0.46	2492	0.00192	1.32	0.65	2560	0.0005945	1.759	0.57
exm2265645	3	186296304	rs2121752	A/G	DNAJB11	other/AIMS	11920	0.443804	1.057	0.079	0.17	3263	0.8353	0.958	0.57	571	0.2022	1.729	0.001	3034	0.2291	1.186	0.0078	2492	0.3441	0.991	0.88	2560	0.3362	1.017	0.78
exm505316	5	176011198	rs115353627	G/A	CDHR2	NS	11920	0.00318091	1.339	0.19	0.42	3263	0.003029	0.328	0.12	571	0.001241	16.928	0.001	3034	0	NA	NA	2492	0.003072	1.027	0.96	2560	0.007729	1.482	0.19
exm839952	10	90342837	rs2296545	G/C	RNLS	NS	11920	0.451491	1.01	0.73	0.5	3263	0.5033	0.996	0.94	571	0.3983	1.569	0.001	3034	0.4143	1.026	0.64	2492	0.462	0.961	0.5	2560	0.4346	0.988	0.84
exm977906	12	6649710	rs138380449	A/G	IFFO1	NS	11871	0.00464068	1.088	0.67	0.76	3252	0.002564	0.931	0.9	570	0	>999.999	0.001	3027	0.0007455	1.304	0.77	2466	0.005385	0.864	0.72	2556	0.01249	1.01	0.97
exm-rs7601713	2	157552860	rs7601713	A/C	GPD2	other/GWAS	11920	0.193307	1.042	0.23	0.63	3263	0.1561	1.09	0.22	571	0.2134	0.546	0.0011	3034	0.1986	0.992	0.91	2492	0.1621	1.069	0.38	2560	0.2539	1.118	0.098
exm2266277	6	160610124	rs791183	A/G	SLC22A2	other	11920	0.479589	0.956	0.11	0.14	3263	0.4182	1.011	0.83	571	0.5236	0.637	0.0011	3034	0.4575	0.964	0.51	2492	0.4416	0.918	0.15	2560	0.6032	1.022	0.73
exm2253338	18	11752462	rs78167172	T/G	GNAL	S	11920	0.00722333	1.336	0.06	0.68	3263	0	NA	NA	571	0	>999.999	0.0011	3034	0.02684	1.257	0.15	2492	0	NA	NA	2560	0.0002973	<0.001	0.51
exm1422481	19	9236969	rs61751875	A/G	OR7G3	ST	11920	0.0436713	1.161	0.028	0.41	3263	0.08015	1.084	0.4	571	0.1017	1.981	0.0011	3034	0.05094	1.142	0.27	2492	0.005376	1.384	0.37	2560	0.004162	0.769	0.6
exm1422506	19	9237622	rs115923170	C/T	OR7G3	NS	11920	0.043605	1.163	0.027	0.41	3263	0.07992	1.087	0.38	571	0.1017	1.981	0.0011	3034	0.05094	1.142	0.27	2492	0.005376	1.384	0.37	2560	0.004162	0.769	0.6
exm2259998	1	216655251	rs6604611	A/C	ESRRG	other/AIMS	11918	0.310288	0.918	0.015	0.65	3261	0.6523	0.913	0.12	571	0.2333	0.541	0.0012	3034	0.2639	0.981	0.75	2492	0.1352	0.939	0.46	2560	0.08383	0.888	0.28
exm306127	3	44871505	rs11710339	T/A	KIF15	NS	11918	0.0808697	0.937	0.21	0.71	3261	0.05177	0.96	0.74	571	0.06824	0.281	0.0012	3034	0.000994	<0.001	0.078	2492	0.1025	1.092	0.35	2560	0.1998	0.888	0.11
exm791142	9	135205006	rs882709	C/G	SETX	NS	11896	0.212151	1.023	0.54	0.59	3242	0.2096	0.912	0.16	571	0.3561	1.669	0.0012	3033	0.3866	1.085	0.15	2491	0.09185	0.966	0.73	2559	0.0654	0.978	0.86
exm2267256	11	24029671	rs2957778	A/G	LUZP2	other/AIMS	11913	0.467967	1.081	0.014	0.8	3263	0.2411	1.103	0.15	569	0.586	1.641	0.0012	3033	0.2826	1.053	0.39	2489	0.7521	1.05	0.48	2559	0.7317	1.025	0.71
exm1342783	17	59668229	rs140093645	G/C	NACA2	NS	11920	0.0010603	1.831	0.099	0.1	3263	0.000466	<0.001	0.27	571	0.002481	11.053	0.0012	3034	0.002485	1.55	0.36	2492	0	>999.999	0.19	2560	0.0005945	<0.001	0.32
exm1393283	18	72997677	rs3826609	T/C	TSHZ1	S	11920	0.200994	1.014	0.69	0.0074	3263	0.09599	0.965	0.7	571	0.1439	1.842	0.0012	3034	0.2073	0.949	0.44	2492	0.2523	0.983	0.8	2560	0.3014	1.076	0.25
exm2253546	18	72997677	rs3826609	T/C	TSHZ1	S	11920	0.200994	1.014	0.69	0.0074	3263	0.09599	0.965	0.7	571	0.1439	1.842	0.0012	3034	0.2073	0.949	0.44	2492	0.2523	0.983	0.8	2560	0.3014	1.076	0.25
exm40391	1	32669645	rs41263993	T/C	CCDC28B	SP	11920	0.00695825	1.039	0.81	0.061	3263	0.001864	3.258	0.0061	571	0	>999.999	0.0013	3034	0.0002485	<0.001	0.47	2492	0.01459	0.623	0.077	2560	0.01724	1.024	0.92
exm955998	11	113078035	rs17115154	T/C	NCAM1	NS	11920	0.00788602	1.113	0.47	0.73	3263	0.006058	1.745	0.06	571	0	>999.999	0.0013	3034	0.000497	<0.001	0.18	2492	0.01037	0.849	0.58	2560	0.01902	0.928	0.74
exm2272196	14	102183359	rs11626651	C/T	LINC00239	other/AIMS	11918	0.4886	0.972	0.34	0.27	3263	0.205	0.944	0.41	571	0.6266	0.635	0.0013	3033	0.5154	1.025	0.65	2491	0.6747	0.962	0.52	2560	0.6412	1.015	0.82
exm2272388	16	63717319	rs935813	C/T	NOT_FOUND	other	11918	0.439812	1	0.99	0.29	3263	0.5652	0.894	0.035	570	0.551	1.612	0.0013	3034	0.5209	1.034	0.54	2491	0.2237	0.98	0.77	2560	0.3234	1.028	0.66
exm1298405	17	16852261	rs72553876	C/T	TNFRSF13B	NS	11920	0.000198807	2.097	0.36	0.42	3263	0.000233	<0.001	0.5	571	0	>999.999	0.0013	3034	0	NA	NA	2492	0.000384	<0.001	0.27	2560	0.0002973	1.897	0.65
exm1382945	18	33694329	NA	C/T	SLC39A6	NS	11917	0.000463945	1.551	0.46	0.3	3262	0.000233	<0.001	0.43	571	0	>999.999	0.0013	3034	0	NA	NA	2490	0	NA	NA	2560	0.001784	0.981	0.98
exm2268297	20	40783392	rs6030011	G/A	PTPRT	other	11919	0.479785	1.038	0.18	0.3	3263	0.6431	0.934	0.21	571	0.4305	1.556	0.0013	3034	0.4409	1.069	0.23	2492	0.394	1.091	0.14	2559	0.3962	1.006	0.92
exm20381	1	16255644	rs848208	T/C	SPEN	NS	11920	0.169516	0.992	0.83	0.24	3263	0.04823	0.928	0.55	571	0.3127	1.626	0.0014	3034	0.2721	0.984	0.79	2492	0.2473	0.946	0.42	2560	0.107	0.972	0.77
exm2270096	5	99291077	rs2968260	G/T	LOC100133050	other	11918	0.474682	1.086	0.0032	0.98	3262	0.5632	1.163	0.0049	571	0.2444	1.741	0.0014	3034	0.3705	1.017	0.77	2491	0.4412	0.989	0.86	2560	0.5675	1.111	0.079
exm-rs1106766	12	57809456	rs1106766	T/C	INHBC	other/GWAS	11920	0.166733	0.99	0.8	0.96	3263	0.1158	1.008	0.92	571	0.06576	2.319	0.0014	3034	0.07704	1.068	0.51	2492	0.3483	0.98	0.75	2560	0.2227	0.918	0.24
exm1607317	22	38212624	rs17856459	T/C	GCAT	NS	11920	0.00477137	1.187	0.36	0.9	3263	0.003495	1.118	0.8	571	0	>999.999	0.0014	3034	0	NA	NA	2492	0.008833	0.903	0.75	2560	0.01011	1.209	0.5
exm1617749	22	46615880	rs1800234	C/T	PPARA	NS	11920	0.0204109	1.109	0.27	0.84	3263	0.000233	<0.001	0.54	571	0.004963	6.719	0.0014	3034	0.05641	0.981	0.87	2492	0.02765	1.218	0.24	2560	0.001189	1.747	0.48
exm55392	1	46049849	rs28365868	C/G	NASP	NS	11917	0.0192257	1.045	0.67	0.53	3263	0.000932	1.439	0.64	571	0.002481	9.623	0.0015	3031	0.06695	0.982	0.87	2492	0.002688	0.175	0.069	2560	0.002378	2.662	0.03
exm121977	1	169521853	rs6033	G/A	F5	NS	11920	0.0544069	1.105	0.087	0.59	3263	0.01608	1.128	0.57	571	0.02357	2.964	0.0015	3034	0.06759	0.99	0.93	2492	0.0818	1.131	0.24	2560	0.07372	1.075	0.51
exm637999	7	99032559	rs150504114	A/G	PTCD1	NS	11920	0.00722333	1.073	0.64	0.09	3263	0.003495	0.678	0.45	571	0.001241	18.082	0.0015	3034	0.000497	1.169	0.9	2492	0.01651	1.154	0.51	2560	0.01427	0.919	0.74
exm-rs3108919	8	101841546	rs3108919	C/T	YWHAZ	other/GWAS	11919	0.498807	1.009	0.78	0.65	3263	0.7863	0.95	0.48	571	0.3201	1.604	0.0015	3033	0.4893	0.995	0.93	2492	0.3786	0.98	0.74	2560	0.2791	1.036	0.59
exm822973	10	49400730	rs116034788	T/C	FRMPD2	NS	11920	0.00145792	1.038	0.91	0.94	3263	0.002097	0.684	0.57	571	0	>999.999	0.0015	3034	0.0002485	<0.001	0.3	2492	0.00192	1.657	0.39	2560	0.002081	0.263	0.18
exm2264439	11	121291294	rs297494	C/A	SORL1	other	11919	0.431875	1.016	0.57	0.47	3263	0.613	0.974	0.63	571	0.2754	1.56	0.0015	3033	0.3504	0.963	0.52	2492	0.3717	1.055	0.37	2560	0.3823	1.008	0.9
exm2225740	17	15341322	rs184570389	A/G	CDRT4	NS	11920	0.000795229	2.221	0.043	0.19	3263	0.000233	<0.001	0.47	571	0	>999.999	0.0015	3034	0.002485	1.927	0.14	2492	0	NA	NA	2560	0.0002973	1.981	0.62
exm2253576	18	8439366	rs12607406	G/A	PTPRM	other	11919	0.473953	1.025	0.38	0.59	3263	0.4091	1.022	0.68	571	0.4851	0.625	0.0015	3033	0.6335	1.031	0.59	2492	0.379	1.105	0.091	2560	0.4367	1.023	0.7
exm-rs11886868	2	60720246	rs11886868	T/C	BCL11A	other/GWAS	11918	0.445785	0.955	0.16	0.73	3263	0.7034	0.956	0.43	570	0.2878	0.537	0.0016	3033	0.02859	0.997	0.99	2492	0.4267	0.984	0.78	2560	0.6685	0.981	0.76
exm-rs10172646	2	60720757	rs10172646	A/G	BCL11A	other/AIMS	11918	0.443664	0.956	0.17	0.7	3263	0.6966	0.956	0.43	570	0.2878	0.537	0.0016	3033	0.02859	0.997	0.99	2492	0.4251	0.992	0.89	2560	0.6688	0.977	0.71
exm-rs2295663	6	31669295	rs2295663	C/T	ABHD16A	other/HLA	11918	0.0526176	1.116	0.081	0.66	3263	0.01351	0.86	0.54	571	0.1998	1.703	0.0016	3032	0.07778	1.058	0.58	2492	0.02995	1.132	0.45	2560	0.0547	0.992	0.95
exm721840	8	133899575	rs2069548	A/G	TG	NS	11920	0.00583168	0.992	0.96	0.42	3263	0.001631	2.478	0.065	571	0.002481	10.544	0.0016	3034	0	NA	NA	2492	0.007296	0.695	0.33	2560	0.01784	0.796	0.34
exm2248020	9	32424659	rs3814519	A/C	ACO1	NS	11920	0.02167	1.06	0.55	0.34	3263	0	>999.999	0.066	571	0.01365	4.02	0.0016	3034	0.07803	0.985	0.88	2492	0.000384	<0.001	0.34	2560	0.0002973	1.862	0.66
exm-rs2184898	10	119418104	rs2184898	A/G	EMX2	other/GWAS	11919	0.258218	1.013	0.68	0.97	3262	0.2207	0.922	0.21	571	0.2742	1.584	0.0016	3034	0.1978	1.004	0.96	2492	0.2527	1.064	0.34	2560	0.3787	0.99	0.87
exm1223893	16	20975817	rs146749118	G/A	DNAH3	NS	11920	0.0019218	0.882	0.71	0.18	3263	0	NA	NA	571	0	>999.999	0.0016	3034	0.007207	0.464	0.066	2492	0	>999.999	0.32	2560	0	>999.999	0.057
exm1245783	16	58552349	rs11865588	A/G	SETD6	NS	11920	0.00410868	0.917	0.7	0.82	3263	0.01421	0.845	0.47	571	0	>999.999	0.0016	3034	0	NA	NA	2492	0	NA	NA	2560	0.0002973	<0.001	0.46
exm1245887	16	58577467	rs149955130	G/C	CNOT1	NS	11920	0.00417495	0.899	0.64	0.82	3263	0.01445	0.829	0.42	571	0	>999.999	0.0016	3034	0	NA	NA	2492	0	NA	NA	2560	0.0002973	<0.001	0.46
A1/A2: minor allele/major allele
MAF: minor allele frequency in controls
P_Het: p-value from case-only testing (advanced vs non-advanced)
NS: non-synonymous; S: synonymous; SP: splice site
Adjusted for age and the first 10 eigenvectors
