# Supplementary material for: Genome-Wide Testing of Putative Functional Exonic Variants in Relationship with Breast and Prostate Cancer Risk in a Multiethnic Population
Source: PLoS Genet. 2013 Mar 28;9(3):e1003419. doi: 10.1371/journal.pgen.1003419 (PMC3610631; doi:10.1371/journal.pgen.1003419)
Supplement: Table S4 — One hundred most significant associations between single SNPs and (S4.1) advanced prostate cancer and (S4.2) localized prostate cancer. (XLSX) [file pgen.1003419.s006.xlsx]

## Sheet: Sheet1
Supplemental Table S4: One Hundred Most Significant Associations between Single SNPs and (S4.1) Advanced Prostate Cancer and (S4.2) Localized Prostate Cancer
S4.1 Advanced versus Controls
														Overall		Advanced		Non-advanced
SNP	Chr	Position	SNP ID	A1/A2	Gene	Type	No. of samples	MAF	AA_MAF	NH_MAF	JA_MAF	LA_MAF	EA_MAF	OR	P	OR	P	OR	P	P_Het
exm280349	2	239049718	NA	A/G	KLHL30	NS	11920	0.000463883	0	0	0	0	0.002081	3.067	0.015	13.991	1.7e-09	1.637	0.4	6.1e-06
exm1488544	19	49376683	rs45533432	G/A	PPP1R15A	NS	11916	0.00351273	0.002097	0.002481	0	0.00384	0.009512	1.935	0.00051	4.677	1.2e-08	1.665	0.014	0.00093
exm-rs7837688	8	128539360	rs7837688	T/G	LOC727677	other/GWAS	11920	0.097283	0.05638	0.1787	0.1461	0.06682	0.09512	1.51	6.8e-22	1.703	1.5e-08	1.466	4.5e-17	0.17
exm643590	7	100634145	rs143984295	A/G	MUC12	NS	11920	0.000397614	0	0	0	0.000384	0.001486	4.629	0.0006	14.425	1.5e-08	3.445	0.012	0.016
exm701486	8	55540418	rs114797722	C/G	RP1	NS	11920	0.000463883	0.001631	0	0	0	0	3.012	0.018	13.409	2e-08	1.692	0.37	0.00012
exm782688	9	130224593	rs150292099	G/A	LRSAM1	NS	11920	0.000596421	0.002097	0	0	0	0	3.181	0.0048	10.488	3.5e-07	2.351	0.065	0.0067
exm2275251	17	58235051	rs185658468	T/A	CA4	SP	11920	0.00119284	0	0.002481	0.003976	0	0	1.475	0.28	7.137	5.1e-07	0.87	0.76	2e-06
exm1321007	17	39520119	rs150620728	T/C	KRT33B	NS	11904	0.000996016	0.002816	0	0	0.001152	0	2.122	0.023	7.485	5.8e-07	1.469	0.32	0.00083
exm2258534	7	97860299	rs115819213	A/G	TECPR1	S	11899	0.00417994	0.01026	0	0	0.00384	0.002675	1.426	0.057	3.829	7.4e-07	1.088	0.69	6.1e-05
exm942022	11	75439894	rs141331999	G/A	MOGAT2	NS	11920	0.00072896	0.000932	0	0	0.000384	0.001784	1.847	0.15	8.489	9.4e-07	1.021	0.97	0.00018
exm594160	6	167343185	rs35716361	T/G	RNASET2	NS	11918	0.000861726	0.00303	0	0	0	0	2.458	0.013	8.129	1.1e-06	1.93	0.11	0.002
exm-rs16901979	8	128124916	rs16901979	A/C	PCAT1	other/GWAS	11920	0.177999	0.3847	0.1216	0.1774	0.03533	0.03894	1.473	6.2e-25	1.549	1.2e-06	1.463	1.1e-21	0.7
exm-rs4242384	8	128518554	rs4242384	C/A	LOC727677	other/GWAS	11920	0.127104	0.1328	0.1935	0.1638	0.07796	0.0981	1.436	6.8e-21	1.521	1.9e-06	1.405	1e-16	0.48
exm1607984	22	38483189	NA	G/A	BAIAP2L2	NS	11911	0.00126011	0.001865	0	0.001244	0.001923	0.0002973	1.98	0.029	6.084	2.4e-06	1.524	0.24	0.0003
exm865049	10	129901717	rs61729197	A/G	MKI67	NS	11893	0.00205734	0.00699	0	0	0.0003846	0	1.592	0.08	5.299	2.4e-06	1.173	0.6	7.7e-05
exm2091817	5	149219663	rs138772212	A/G	PPARGC1B	NS	11920	0.000596421	0	0.001241	0.00174	0	0.0002973	2.135	0.079	7.41	2.6e-06	1.001	1	0.00079
exm1358964	17	74729764	rs147321492	C/T	METTL23	NS	11920	0.00145792	0.001165	0.002481	0	0.001536	0.00327	1.594	0.14	5.704	4.2e-06	0.89	0.77	2.6e-06
exm594661	6	167754401	rs34740867	G/A	TTLL2	NS	11920	0.00271703	0.00932	0	0	0.000384	0	1.639	0.03	4.406	4.4e-06	1.279	0.35	0.0008
exm835133	10	75565704	rs150846687	T/C	NDST2	NS	11920	0.000662691	0.001864	0	0	0.000768	0	2.25	0.051	8.474	4.9e-06	1.481	0.43	0.00033
exm163248	1	240370313	rs140911005	A/G	FMN2	NS	11920	0.000463883	0	0	0.001491	0	0.0002973	3.623	0.0036	10.197	6e-06	2.643	0.053	0.021
exm796089	9	138516420	NA	T/G	GLT6D1	NS	11920	0.00072896	0.002563	0	0	0	0	2.095	0.069	8.248	6e-06	1.524	0.37	0.0012
exm911431	11	57428280	rs147951568	C/T	CLP1	NS	11920	0.00072896	0.000699	0	0	0.000768	0.001784	1.672	0.23	7.522	6.9e-06	1.039	0.94	6.6e-05
exm639504	7	99695787	rs139603502	C/T	MCM7	NS	11919	0.000463945	0.001398	0	0	0.000384	0	1.9	0.23	10.396	7.4e-06	NA	NA	4.6e-05
exm1263954	16	84212647	rs150717903	C/T	TAF1C	NS	11873	0.000465735	0.001635	0	0	0	0	1.871	0.24	10.118	8.3e-06	NA	NA	0.00021
exm783739	9	130580575	rs116330805	T/C	ENG	NS	11920	0.00291584	0.007689	0.001241	0	0.00192	0.001486	1.307	0.25	4.128	1e-05	0.995	0.98	0.00011
exm896129	11	20139768	rs144927008	A/T	NAV2	NS	11907	0.000464314	0.000233	0	0	0.001154	0.0008918	1.999	0.15	9.086	1.1e-05	1.007	0.99	0.00035
exm626113	7	73279484	NA	A/G	WBSCR28	ST	11904	0.000596817	0.002097	0	0	0	0	2.254	0.074	9.255	1.3e-05	1.554	0.41	0.0087
exm156461	1	228548255	rs147709306	C/G	OBSCN	NS	11920	0.000861498	0.003029	0	0	0	0	2.777	0.0036	7.387	1.5e-05	2.403	0.021	0.026
exm1232006	16	30004603	rs146278367	G/T	HIRIP3	NS	11918	0.000530223	0	0	0.00174	0	0.0002973	3.541	0.0023	9.067	1.7e-05	2.915	0.017	0.067
exm538457	6	33271971	rs138516982	T/C	TAPBP	NS	11920	0.00125911	0.004194	0	0	0	0.0002973	1.946	0.038	6.16	1.8e-05	1.531	0.24	0.003
exm809838	10	12215734	rs34863826	G/A	NUDT5	NS	11920	0.000927767	0.003262	0	0	0	0	1.278	0.55	7.154	1.8e-05	0.344	0.14	6.2e-07
exm1545441	20	44511697	rs142962530	G/A	ZSWIM1	NS	11920	0.000530152	0.001864	0	0	0	0	1.954	0.18	9.202	1.9e-05	1.168	0.8	0.00024
exm1255759	16	71509207	rs75731908	C/A	ZNF19	NS	11920	0.00603048	0.01957	0.001241	0	0.001536	0.0005945	1.186	0.31	3.079	1.9e-05	0.975	0.9	8.9e-05
exm118366	1	161681869	rs71634903	G/A	FCRLA	NS	11920	0.000861498	0	0	0.003231	0	0	1.402	0.44	7.146	1.9e-05	0.713	0.55	8e-05
exm1538066	20	34572607	rs138969375	T/C	C20orf152	NS	11918	0.00072896	0.00233	0	0	0.000384	0	1.383	0.48	7.643	2e-05	0.548	0.35	3.2e-06
exm608451	7	21659659	NA	T/C	DNAH11	NS	11919	0.00139183	0.00466	0	0	0.0003843	0	0.947	0.88	5.656	2.1e-05	0.38	0.068	1.4e-08
exm1039425	12	113565637	rs146551951	A/G	RASAL1	NS	11920	0.00444003	0.003728	0	0	0.008065	0.008918	1.355	0.097	3.126	2.2e-05	1.161	0.46	0.00022
exm653116	7	120971816	rs116350731	C/T	WNT16	NS	11920	0.000861498	0.00233	0	0	0.000768	0.0002973	1.869	0.11	7.126	2.2e-05	1.044	0.93	5.5e-05
exm1460974	19	38127024	rs147806327	C/T	ZFP30	NS	11919	0.001193	0.003963	0	0	0.000384	0	1.352	0.41	6.076	2.4e-05	0.791	0.62	2e-05
exm851540	10	103920344	rs11191224	T/G	NOLC1	NS	11920	0.00715706	0.0205	0.001241	0	0.004992	0.001784	1.39	0.029	2.956	2.6e-05	1.234	0.2	0.0017
exm935696	11	68701997	rs140221316	G/A	IGHMBP2	NS	11920	0.00132538	0.00466	0	0	0	0	1.077	0.84	5.876	2.8e-05	0.597	0.3	1.2e-06
exm779749	9	125589057	rs143503466	A/G	PDCL	NS	11920	0.001723	0.005592	0	0	0.000384	0.0002973	1.528	0.16	5.205	2.9e-05	1.14	0.7	0.0017
exm1769323	1	236389655	rs188136623	A/C	ERO1LB	NS	11906	0.00165826	0	0.007444	0.004729	0	0	1.492	0.2	5.191	2.9e-05	0.974	0.95	0.00013
exm1338485	17	54559801	rs139388119	A/G	ANKFN1	NS	11917	0.00125961	0.004427	0	0	0	0	1.448	0.29	5.88	3.2e-05	0.909	0.82	0.00019
exm688219	8	22267473	rs79856562	A/T	SLC39A14	NS	11886	0.000928751	0.003262	0	0	0	0	2.015	0.059	6.813	3.3e-05	1.495	0.35	0.003
exm2233759	1	67793935	rs191377276	A/T	IL12RB2	NS	11920	0.000596421	0	0	0.002237	0	0	2.308	0.064	8.314	3.3e-05	1.601	0.37	0.0071
exm2258715	8	144663466	rs2305493	A/G	EEF1D	S	11920	0.00603048	0	0.001241	0.02237	0	0	1.402	0.043	3.203	3.6e-05	1.104	0.6	0.00036
exm488139	5	140736146	rs115115119	G/A	PCDHGA4	NS	11920	0.00695825	0.02237	0.001241	0	0.003072	0	1.521	0.0043	2.817	3.7e-05	1.425	0.024	0.0075
exm149354	1	216373416	rs148135241	C/A	USH2A	NS	11920	0.00914513	0	0.01737	0.02957	0.000384	0.001189	1.235	0.14	2.665	3.8e-05	1.052	0.75	0.00039
exm871047	11	551741	rs139348192	T/C	LRRC56	NS	11920	0.00125911	0.001631	0.001241	0	0.001536	0.002081	1.89	0.04	5.301	3.9e-05	1.506	0.24	0.0066
exm1615423	22	43831058	rs182725627	C/G	MPPED1	NS	11914	0.000530434	0.001865	0	0	0	0	1.94	0.17	8.531	4.1e-05	1.244	0.7	0.0019
exm1584197	22	18609493	rs145621219	A/G	TUBA8	NS	11920	0.000463883	0	0	0	0	0.002081	1.449	0.51	8.816	4.6e-05	NA	NA	0.00012
exm487292	5	140604011	rs61734412	T/A	PCDHB14	NS	11920	0.00218688	0.007456	0	0	0.000384	0	1.769	0.024	4.565	4.9e-05	1.556	0.11	0.012
exm1132259	14	105407770	NA	A/T	AHNAK2	NS	11919	0.000596501	0.001166	0	0	0	0.001189	1.198	0.73	7.965	5.1e-05	0.466	0.32	8.5e-06
exm514521	6	7231754	NA	G/C	RREB1	NS	11920	0.00132538	0.001631	0.001241	0	0.001536	0.002378	1.346	0.38	5.136	5.4e-05	0.791	0.58	5.6e-05
exm107884	1	155912426	rs142470296	G/A	RXFP4	NS	11919	0.00139165	0.004893	0	0	0	0	1.606	0.15	5.518	5.8e-05	1.227	0.59	0.00081
exm2268881	1	41306571	rs12402583	T/C	KCNQ4	other/AIMS	11918	0.373956	0.6568	0.2122	0.2306	0.2815	0.2949	0.966	0.26	0.734	5.9e-05	1	1	0.00011
exm382860	4	2695585	rs139214890	T/C	FAM193A	NS	11913	0.000596738	0.000233	0	0	0.001152	0.001486	2.328	0.051	7.225	6.3e-05	1.789	0.24	0.0054
exm728835	8	144945012	NA	A/G	EPPK1	NS	11910	0.00139183	0.004429	0	0	0.000384	0.0002973	1.259	0.51	5.453	6.5e-05	0.742	0.5	0.00014
exm1196002	16	347063	rs117208012	T/C	AXIN1	NS	11919	0.00656064	0.00466	0.002481	0	0.006912	0.01754	1.1	0.56	2.733	6.6e-05	0.833	0.33	1.4e-05
exm956634	11	113629371	rs142759842	A/G	ZW10	NS	11920	0.00218688	0	0.001241	0.007952	0	0	1.777	0.024	4.125	6.7e-05	1.542	0.13	0.011
exm114755	1	159858278	rs145722573	T/G	CCDC19	NS	11915	0.00589873	0.02027	0	0	0.000768	0	1.181	0.33	2.903	6.7e-05	0.975	0.9	0.00022
exm484475	5	140230548	rs140013560	A/C	PCDHA9	NS	11848	0.00179928	0.005855	0	0	0.0007764	0	1.636	0.065	4.859	6.9e-05	0.981	0.95	0.00029
exm496397	5	150441761	rs147561136	C/T	TNIP1	NS	11920	0.000861498	0.003029	0	0	0	0	1.191	0.69	6.574	6.9e-05	0.702	0.54	7.5e-06
exm1078710	13	108922556	NA	A/G	TNFSF13B	NS	11902	0.00384717	0.0004666	0.001241	0.007708	0.008455	0.0005952	1.379	0.087	3.118	7.2e-05	1.211	0.35	0.0045
exm156126	1	228505275	rs113376653	T/C	OBSCN	NS	11920	0.00788602	0.0261	0	0	0.00192	0.0005945	1.218	0.19	2.767	7.2e-05	1.021	0.9	0.00059
exm1835513	15	58476204	rs143394617	C/T	AQP9	NS	11920	0.00218688	0	0.008685	0.006461	0	0	1.701	0.038	4.099	7.6e-05	1.285	0.4	0.0037
exm1569771	21	38390362	rs150799198	A/G	DSCR6	NS	11920	0.0010603	0.003728	0	0	0	0	1.502	0.28	6.165	7.7e-05	0.952	0.91	0.00024
exm1737981	11	76796077	rs185836777	A/G	CAPN5	NS	11920	0.00225315	0	0.002481	0.007952	0	0	2.099	0.0021	4.32	8e-05	1.822	0.022	0.052
exm255927	2	201337629	NA	T/G	SPATS2L	NS	11920	0.000596421	0.002097	0	0	0	0	1.26	0.66	7.849	8.2e-05	0.499	0.37	0.00013
exm1496059	19	51519225	rs78983379	T/C	KLK10	NS	11870	0.00139516	0.004904	0	0	0	0	1.02	0.96	5.337	8.2e-05	0.615	0.29	6.2e-06
exm1361081	17	76497940	rs139273056	T/C	DNAH17	NS	11920	0.000596421	0.001864	0	0	0.000384	0	3.597	0.001	7.749	8.5e-05	3.245	0.0045	0.11
exm1274771	17	1553040	NA	T/C	RILP	NS	11919	0.00072896	0.000466	0	0	0.000768	0.002081	1.816	0.15	6.621	8.5e-05	1.101	0.85	0.00086
exm572241	6	111695631	rs3218595	A/C	REV3L	NS	11920	0.0170974	0.05778	0.001241	0	0.002304	0.0008918	1.313	0.0069	2.193	8.6e-05	1.239	0.05	0.0053
exm1532204	20	30610508	rs140563493	T/A	C20orf160	NS	11920	0.00212061	0.005592	0	0	0.000768	0.001784	1.635	0.059	4.327	8.7e-05	1.179	0.59	0.0014
exm1311355	17	33313129	rs3744356	T/C	LIG3	NS	11920	0.001723	0	0	0.005964	0	0.0005945	1.261	0.44	4.352	8.9e-05	0.822	0.6	9.3e-05
exm1336525	17	48618243	rs145595403	G/C	EPN3	NS	11920	0.00331345	0.01165	0	0	0	0	1.513	0.049	3.598	9e-05	1.238	0.37	0.0014
exm109919	1	156641200	rs147070824	A/T	NES	NS	11855	0.000598007	0.002104	0	0	0	0	2.005	0.13	7.747	9e-05	1.435	0.49	0.0037
exm1536537	20	33711831	rs149260082	C/T	EDEM2	NS	11920	0.000530152	0.000233	0	0.0002485	0	0.001784	2.522	0.039	7.893	9.1e-05	2.087	0.14	0.02
exm1510417	19	56370608	rs140863186	G/A	NLRP4	NS	11920	0.000662691	0.00233	0	0	0	0	2.081	0.091	7.481	9.3e-05	1.077	0.89	0.0012
exm793912	9	136501728	rs77273740	T/C	DBH	NS	11920	0.000596421	0	0.001241	0	0	0.002378	1.697	0.28	7.594	9.3e-05	1.033	0.96	0.0007
exm543885	6	38800164	rs9357283	A/G	DNAH8	NS	11919	0.196978	0.1528	0.3201	0.2955	0.1507	0.1418	0.902	0.0039	0.693	9.6e-05	0.931	0.057	0.0042
exm607367	7	18631217	rs140585698	G/C	HDAC9	NS	11920	0.000662691	0.00233	0	0	0	0	2.337	0.043	7.457	9.8e-05	1.86	0.19	0.017
exm834170	10	75156284	rs148945182	T/G	ANXA7	NS	11920	0.00125911	0.003728	0	0	0.000768	0.0002973	1.383	0.35	4.795	9.9e-05	0.851	0.71	3.3e-05
exm758369	9	86617349	rs149512376	T/C	RMI1	NS	11920	0.00139165	0.004427	0	0	0.000768	0	1.522	0.2	5.292	0.0001	1.118	0.77	0.0011
exm640764	7	100033389	NA	T/C	C7orf47	SP	11920	0.000662691	0	0.001241	0	0	0.002675	3.295	0.0019	7.306	0.00011	2.719	0.017	0.16
exm1874792	17	10429123	rs187438258	A/G	MYH2	NS	11920	0.000662691	0	0	0.002237	0	0.0002973	2.747	0.013	7.323	0.00011	2.305	0.065	0.046
exm216539	2	101023110	rs150069978	T/C	CHST10	NS	11920	0.00377734	0.009553	0.01365	0	0.001536	0.0002973	1.586	0.023	3.473	0.00011	1.333	0.2	0.0063
exm114678	1	159842779	rs145923860	T/C	CCDC19	NS	11918	0.00318176	0.01072	0	0	0.000768	0	1.242	0.34	3.418	0.00011	0.941	0.82	0.00039
exm423181	4	125593261	rs145437766	C/T	ANKRD50	NS	11920	0.00185553	0.006524	0	0	0	0	2.053	0.0053	4.279	0.00012	1.893	0.024	0.031
exm1003723	12	52282460	rs150919589	T/C	ANKRD33	NS	11920	0.000662691	0.00233	0	0	0	0	1.662	0.27	7.286	0.00012	1.101	0.86	0.0019
exm1708769	11	36057654	NA	C/G	LDLRAD3	SP	11920	0.000662691	0	0	0.002485	0	0	1.389	0.51	7.254	0.00012	0.706	0.6	0.00011
exm823889	10	50532542	rs190417157	G/A	C10orf71	NS	11920	0.000795229	0.00233	0	0	0.000768	0	1.217	0.66	6.328	0.00012	0.672	0.49	2.9e-05
exm588860	6	154411240	rs34074916	A/T	OPRM1	NS	11920	0.000662691	0.00233	0	0	0	0	1.19	0.73	7.343	0.00012	0.564	0.38	0.00029
exm593686	6	165711487	rs145070973	A/G	C6orf118	NS	11908	0.000596738	0.002097	0	0	0	0	2.912	0.0098	7.502	0.00013	2.035	0.14	0.013
exm818292	10	31810679	rs141194628	G/A	ZEB1	NS	11920	0.00072896	0.000932	0.002481	0	0.000768	0.0008918	2.545	0.017	6.412	0.00013	2.202	0.068	0.031
exm908982	11	55945018	rs139773791	T/C	OR5J2	NS	11919	0.00271703	0	0	0.005219	0.00768	0	1.314	0.24	3.536	0.00013	0.871	0.62	4.9e-05
exm198617	2	68613681	rs140933780	T/C	PLEK	NS	11920	0.000596421	0	0	0	0	0.002675	1.142	0.81	7.418	0.00013	NA	NA	0.00011
exm1199657	16	847033	rs80165523	G/C	CHTF18	NS	11903	0.00059658	0.001632	0.001241	0	0.000384	0	2.987	0.0082	7.585	0.00014	2.724	0.025	0.021
exm2261568	3	98169442	rs75457563	G/A	OR5K1	other/AIMS	11919	0.107768	0.3615	0.002481	0.0002485	0.02304	0.003567	1.076	0.17	1.651	0.00014	1.015	0.8	0.00057
S4.2 Non-advanced versus Controls
														Overall		Advanced		Non-advanced
SNP	Chr	Position	SNP ID	A1/A2	Gene	Type	No. of samples	MAF	AA_MAF	NH_MAF	JA_MAF	LA_MAF	EA_MAF	OR	P	OR	P	OR	P	P_Het
exm-rs16901979	8	128124916	rs16901979	A/C	PCAT1	other/GWAS	11920	0.177999	0.3847	0.1216	0.1774	0.03533	0.03894	1.473	6.2e-25	1.549	1.2e-06	1.463	1.1e-21	0.7
exm-rs1456315	8	128103937	rs1456315	G/A	PCAT1	other/GWAS	11920	0.498343	0.4811	0.5161	0.341	0.5246	0.684	0.762	8.6e-22	0.809	0.0017	0.755	7.4e-21	0.3
exm-rs7837688	8	128539360	rs7837688	T/G	LOC727677	other/GWAS	11920	0.097283	0.05638	0.1787	0.1461	0.06682	0.09512	1.51	6.8e-22	1.703	1.5e-08	1.466	4.5e-17	0.17
exm-rs4242384	8	128518554	rs4242384	C/A	LOC727677	other/GWAS	11920	0.127104	0.1328	0.1935	0.1638	0.07796	0.0981	1.436	6.8e-21	1.521	1.9e-06	1.405	1e-16	0.48
exm-rs4242382	8	128517573	rs4242382	A/G	LOC727677	other/GWAS	11920	0.176342	0.2917	0.2035	0.1667	0.08986	0.1011	1.349	1.3e-17	1.349	0.00033	1.33	1.7e-14	0.91
exm-rs1016343	8	128093297	rs1016343	T/C	PCAT1	other/GWAS	11916	0.203925	0.2114	0.1501	0.2631	0.138	0.1876	1.297	1.5e-15	1.317	0.00037	1.293	1.1e-13	0.85
exm-rs1447295	8	128485038	rs1447295	A/C	LOC727677	other/GWAS	11920	0.17674	0.2912	0.1998	0.173	0.08525	0.1005	1.327	9.9e-16	1.344	0.00043	1.303	1.6e-12	0.88
exm-rs7130881	11	68995958	rs7130881	G/A	MYEOV	other/GWAS	11920	0.107422	0.1584	0.05707	0.004473	0.111	0.1748	1.26	9.4e-08	1.31	0.0065	1.271	1.4e-07	0.67
exm-rs10896449	11	68994667	rs10896449	G/A	MYEOV	other/GWAS	11920	0.396355	0.6687	0.3933	0.04374	0.3391	0.5158	1.183	1.1e-07	1.23	0.0063	1.19	2.6e-07	0.73
exm-rs1512268	8	23526463	rs1512268	A/G	NKX3-1	other/GWAS	11919	0.48277	0.6274	0.5409	0.3765	0.4447	0.4408	1.155	2.4e-07	1.146	0.042	1.157	7.6e-07	0.86
exm514211	6	6266854	rs140712764	T/C	F13A1	NS	11920	6.62691e-05	0.000233	0	0	0	0	28.007	9.1e-07	NA	NA	28.366	8.3e-07	0.66
exm-rs10505477	8	128407443	rs10505477	C/T	POU5F1B	other/GWAS	11919	0.460631	0.2104	0.7097	0.6814	0.4105	0.4949	0.861	4.4e-07	0.862	0.038	0.857	8.7e-07	0.85
exm-rs12653946	5	1895829	rs12653946	T/C	IRX4	other/GWAS	11919	0.433059	0.4	0.3772	0.4456	0.4858	0.4328	1.15	4.1e-07	1.14	0.048	1.154	9e-07	0.9
exm-rs6983267	8	128413305	rs6983267	T/G	POU5F1B	other/GWAS	11920	0.436912	0.1493	0.7072	0.6762	0.394	0.486	0.857	3.9e-07	0.841	0.018	0.855	1.3e-06	0.87
exm-rs13252298	8	128095156	rs13252298	G/A	PCAT1	other/GWAS	11920	0.266269	0.07968	0.4677	0.3611	0.3364	0.2883	0.844	1.8e-07	0.839	0.026	0.847	1.6e-06	0.78
exm-rs445114	8	128323181	rs445114	C/T	POU5F1B	other/GWAS	11920	0.490126	0.6475	0.361	0.4814	0.4078	0.3945	0.869	5.9e-07	0.89	0.086	0.867	1.8e-06	0.61
exm1228070	16	25255366	rs61746620	A/G	ZKSCAN2	NS	11918	0.000132556	0.0002331	0	0.0002485	0	0	11.133	8.9e-05	NA	NA	13.396	1.3e-05	0.22
exm-rs10486567	7	27976563	rs10486567	A/G	JAZF1	other/GWAS	11917	0.491383	0.2942	0.6281	0.9003	0.4478	0.2548	0.865	7.7e-06	0.917	0.26	0.862	1.5e-05	0.52
exm-rs4430796	17	36098040	rs4430796	G/A	HNF1B	other/GWAS	11920	0.480186	0.6412	0.3127	0.3683	0.4163	0.4982	0.895	9e-05	1.046	0.5	0.878	1.6e-05	0.0099
exm-rs6545977	2	63301164	rs6545977	A/G	OTX1	other/GWAS	11919	0.407952	0.5196	0.3821	0.1866	0.4482	0.5054	0.877	6e-06	0.908	0.17	0.876	1.7e-05	0.64
exm2255553	2	9637331	rs56237316	G/A	ADAM17	S	11920	0.00483764	0.00233	0.002481	0	0.007296	0.01249	1.951	2.3e-05	1.508	0.26	1.982	2.9e-05	0.51
exm199465	2	70052624	rs146778617	T/G	ANXA4	NS	11920	0.00072896	0.002563	0	0	0	0	4.523	6e-06	6.417	0.00038	4.275	3.4e-05	0.46
exm574153	6	117130704	rs2274911	G/A	GPRC6A	NS	11920	0.300199	0.2379	0.2717	0.4332	0.2657	0.2542	0.875	1.3e-05	0.9	0.15	0.876	4.1e-05	0.76
exm1311040	17	32688826	rs138527286	C/T	CCL1	NS	11920	0.00304838	0.01072	0	0	0	0	2.153	0.00016	1.642	0.35	2.343	4.1e-05	0.44
exm-rs7501939	17	36101156	rs7501939	T/C	HNF1B	other/GWAS	11919	0.388587	0.5	0.2717	0.3232	0.3326	0.396	0.894	8.6e-05	1.014	0.84	0.885	5.3e-05	0.048
exm-rs11228565	11	68978580	rs11228565	A/G	MYEOV	other/GWAS	11920	0.120742	0.1102	0.1638	0.03653	0.1321	0.2158	1.177	9.6e-05	1.194	0.068	1.194	5.6e-05	0.99
exm-rs2735839	19	51364623	rs2735839	A/G	KLK3	other/GWAS	11918	0.297587	0.3013	0.5223	0.3979	0.24	0.1636	0.893	0.00031	1.001	0.99	0.875	5.8e-05	0.054
exm-rs7629490	3	87241497	rs7629490	T/C	MIR4795	other/GWAS	11919	0.357436	0.2272	0.3375	0.4451	0.4616	0.343	1.125	4e-05	1.065	0.36	1.129	6.1e-05	0.38
exm2252911	17	26051702	rs4595846	T/G	NOS2	other	11910	0.47645	0.5009	0.3772	0.5142	0.4431	0.4497	1.106	0.00025	1.06	0.38	1.123	6.3e-05	0.55
exm68152	1	70896038	rs145785987	C/T	CTH	NS	11920	0.000198807	0.000699	0	0	0	0	9.011	3.1e-05	NA	NA	8.761	6.3e-05	0.76
exm1105738	14	61180657	rs3742636	T/G	SIX4	NS	11906	0.368344	0.4256	0.2742	0.4688	0.2479	0.2912	1.125	4e-05	1.073	0.31	1.127	8.6e-05	0.44
exm2266765	8	128920127	rs959409	G/A	PVT1	other/AIMS	11920	0.138966	0.3793	0.03226	0.09095	0.02112	0.00654	1.176	0.00031	1.062	0.59	1.203	0.0001	0.23
exm392074	4	22390167	rs9002	T/C	GPR125	NS	11909	0.223166	0.2823	0.134	0.1886	0.2342	0.202	1.108	0.0013	0.98	0.79	1.139	0.00012	0.051
exm1419304	19	8564474	rs4239541	T/G	PRAM1	NS	11906	0.35919	0.6842	0.1563	0.1499	0.3263	0.2701	1.123	0.0002	1.023	0.76	1.133	0.00015	0.12
exm854616	10	106025864	rs116993524	T/C	GSTO1	NS	11920	0.000795229	0.000932	0	0	0	0.002378	3.397	0.00042	2.773	0.17	3.756	0.00016	0.61
exm-rs7210100	17	47436749	rs7210100	A/G	ZNF652	other/GWAS	11920	0.0138502	0.0466	0.001241	0	0.003072	0	1.472	0.00046	1.076	0.8	1.538	0.00017	0.23
exm586855	6	151672914	NA	G/A	AKAP12	NS	11920	0.000265076	0.000466	0	0	0.000384	0.0002973	6.081	0.00036	NA	NA	6.666	0.00017	0.16
exm-rs7014346	8	128424792	rs7014346	A/G	POU5F1B	other/GWAS	11920	0.313519	0.3898	0.2357	0.2132	0.3095	0.3579	1.12	0.00011	1.064	0.39	1.124	0.00018	0.47
exm-rs339331	6	117210052	rs339331	C/T	RFX6	other/GWAS	11920	0.296554	0.2519	0.2643	0.3688	0.2803	0.2875	0.879	2.1e-05	0.861	0.043	0.887	0.00019	0.66
exm1507288	19	55527081	rs2304167	C/T	GP6	NS	11919	0.280716	0.4653	0.2903	0.2239	0.1889	0.1819	0.879	7e-05	0.891	0.15	0.879	0.00019	0.87
exm2272575	17	16322676	rs4792739	C/T	TRPV2	other/AIMS	11919	0.228363	0.5273	0.1191	0.1909	0.06797	0.04221	1.154	0.00013	1.038	0.69	1.16	0.00019	0.3
exm-rs12621278	2	173311553	rs12621278	G/A	ITGA6	other/GWAS	11920	0.100928	0.01701	0.1042	0.2331	0.08065	0.0648	0.816	5.4e-05	0.856	0.2	0.822	0.00022	0.71
exm1540765	20	37378721	rs34862565	A/G	ACTR5	NS	11920	0.00437376	0.001631	0	0	0.00576	0.01308	1.759	0.0011	1.286	0.56	1.915	0.00022	0.34
exm130537	1	183938537	rs149948023	A/G	GLT25D2	NS	11906	0.000198992	0.0006996	0	0	0	0	6.598	0.0011	NA	NA	7.906	0.00024	0.28
exm265978	2	219530662	rs41272683	A/G	RNF25	NS	11920	0.000331345	0.000233	0	0	0.000768	0.0005945	4.981	0.00071	NA	NA	5.629	0.00025	0.54
exm642186	7	100363155	NA	C/A	ZAN	NS	11920	0.000596421	0.000466	0	0	0.001152	0.001189	3.621	0.00096	NA	NA	4.141	0.00025	0.34
exm224195	2	121744056	rs149091975	A/G	GLI2	NS	11920	0.000198807	0.000699	0	0	0	0	6.661	0.0011	NA	NA	8.033	0.00025	0.2
exm1049448	12	124810911	NA	T/C	NCOR2	NS	11920	0.000397614	0.001398	0	0	0	0	4.113	0.0013	NA	NA	4.877	0.00025	0.2
exm2272092	14	61443539	rs2296926	C/T	TRMT5	other	11910	0.400477	0.4305	0.2792	0.497	0.3555	0.3106	1.108	0.00024	1.095	0.18	1.114	0.00026	0.79
exm2271798	12	113325629	rs4141253	T/C	RPH3A	other	11920	0.484162	0.4874	0.4839	0.4123	0.4555	0.5883	1.086	0.0026	0.968	0.63	1.112	0.00026	0.049
exm-rs5945572	23	51229683	rs5945572	A/G	NOT_FOUND	other/GWAS	8351	0.20694	0.2656	0.07784	0.08412	0.1583	0.3502	1.116	6.8e-05	1.161	0.0099	1.11	0.00027	0.66
exm2262293	7	26688808	rs1012803	T/C	C7orf71	other/AIMS	11919	0.343253	0.6831	0.3189	0.3237	0.1144	0.1159	0.887	0.00053	0.931	0.39	0.875	0.00027	0.48
exm928489	11	65649676	rs114953123	A/G	CTSW	NS	11920	0.000132538	0	0	0	0	0.0005945	8.401	0.0011	NA	NA	9.98	0.00027	0.25
exm975876	12	4737736	rs141858181	A/G	AKAP3	NS	11920	0.000596421	0.001864	0	0	0.000384	0	3.465	0.0019	NA	NA	4.183	0.00028	0.13
exm-rs975730	8	129316014	rs975730	C/T	MIR1208	other/GWAS	11918	0.450815	0.4098	0.2878	0.3083	0.5611	0.6273	0.896	0.00012	0.897	0.11	0.896	0.00029	0.96
exm1124969	14	95582086	rs114947750	A/C	DICER1	NS	11920	0.000994036	0.003262	0	0	0.000384	0	3.113	0.00037	1.214	0.85	3.269	0.00029	0.35
exm1568877	21	37518706	rs1056892	A/G	CBR3	NS	11919	0.370029	0.4555	0.3226	0.3509	0.2965	0.3522	1.103	0.00056	0.988	0.87	1.115	0.00029	0.11
exm13983	1	11097867	rs12142107	T/C	MASP2	SP	11920	0.0984758	0.1925	0.07692	0.08673	0.06452	0.02408	1.151	0.002	1.032	0.78	1.189	0.00031	0.22
exm2032174	3	101576143	rs76884309	G/A	NFKBIZ	NS	11920	0.000994036	0	0	0.003728	0	0	2.709	0.0024	<0.001	0.35	3.223	0.00031	0.091
exm681261	8	10466933	NA	T/C	RP1L1	NS	11920	0.000795229	0.002796	0	0	0	0	3.245	0.00081	1.48	0.71	3.587	0.00033	0.38
exm1151085	15	41810286	rs141055831	T/C	RPAP1	NS	11920	0.00119284	0.001864	0	0	0.00384	0	2.395	0.0027	0.657	0.68	2.814	0.00035	0.11
exm794246	9	136599026	rs147006467	G/C	SARDH	NS	11919	0.000662691	0.00233	0	0	0	0	3.946	0.00015	1.973	0.51	3.832	0.00037	0.43
exm1123817	14	94545604	rs148489393	T/C	DDX24	NS	11920	0.00662691	0.02213	0	0	0.001536	0.0002973	0.458	0.00042	0.7	0.49	0.417	0.00037	0.37
exm-rs6910232	6	10902439	rs6910232	G/A	SYCP2L	other/AIMS	11920	0.384626	0.1761	0.4603	0.6113	0.4904	0.2794	1.122	0.00013	1.027	0.71	1.12	0.00038	0.22
exm1374044	18	7231881	rs144753731	G/A	LRRC30	NS	11920	0.00424122	0.002563	0	0	0.009985	0.008026	0.369	0.00017	0.578	0.35	0.363	0.00039	0.48
exm533062	6	31864538	rs115884658	A/G	EHMT2	NS	11920	0.0047051	0.004893	0.004963	0	0.001536	0.01249	1.757	0.0011	0.927	0.88	1.876	0.0004	0.15
exm1822981	14	93685577	rs76828246	A/G	UBR7	NS	11920	0.000198807	0	0	0.0007455	0	0	6.435	0.0016	NA	NA	7.698	0.0004	0.24
exm1474666	19	43414890	rs116433230	A/C	PSG6	NS	11920	0.00377734	0.01235	0	0	0.001536	0	0.223	4.3e-05	<0.001	0.069	0.266	0.00041	0.37
exm1120452	14	90755014	rs149141901	T/C	C14orf102	NS	11920	0.00125911	0.004427	0	0	0	0	2.624	0.00085	2.586	0.089	2.88	0.00043	0.97
exm2162916	8	12943382	rs142253103	T/C	DLC1	NS	11920	0.000265076	0	0	0.000994	0	0	5.278	0.0019	NA	NA	6.303	0.00044	0.23
exm1207133	16	2296877	rs141206306	T/C	ECI1	NS	11920	0.00271703	0.00233	0	0.0002485	0.002688	0.006837	2.117	0.00039	2.317	0.052	2.155	0.00046	0.83
exm-rs838705	2	234273242	rs838705	G/A	DGKD	other/GWAS	11920	0.362492	0.3861	0.2084	0.2985	0.4389	0.3867	0.913	0.0014	0.962	0.57	0.899	0.00047	0.31
exm-rs4857855	3	128260550	rs4857855	T/C	C3orf27	other/GWAS	11919	0.211531	0.1438	0.2333	0.2751	0.2462	0.19	0.883	0.00027	0.911	0.25	0.881	0.00048	0.73
exm539757	6	33747892	rs111606296	C/T	LEMD2	NS	11919	0.00198834	0.006291	0	0	0.001152	0	2.002	0.0065	<0.001	0.17	2.42	0.00048	0.037
exm1658882	23	135310790	NA	A/C	MAP7D3	NS	8352	0	0	0	0	0	0	429.138	0.0015	NA	NA	778.409	0.00049	0.2
exm947922	11	92703085	rs61739452	C/T	MTNR1B	other	11919	0.000530223	0.001864	0	0	0	0	3.786	0.0013	NA	NA	4.219	0.00051	0.59
exm2252000	14	92624111	rs117009742	G/A	CPSF2	S	11920	0.000331345	0	0.001241	0.000994	0	0	4.97	0.00093	NA	NA	5.403	0.00052	0.71
exm-rs1983891	6	41536427	rs1983891	T/C	FOXP4	other/GWAS	11920	0.378595	0.4625	0.2097	0.4078	0.3756	0.2794	1.107	0.00033	1.15	0.038	1.109	0.00053	0.64
exm-rs1329650	10	93348120	rs1329650	A/C	LOC100188947	other/GWAS	11920	0.398211	0.1184	0.6203	0.7609	0.3829	0.28	0.904	0.0021	0.992	0.92	0.887	0.00053	0.13
exm1544252	20	43851523	rs144708311	A/G	SEMG2	NS	11892	0.00226034	0.007456	0	0.0004983	0	0	2.256	0.00046	1.098	0.9	2.304	0.00054	0.26
exm1787131	12	85623348	rs1395676	A/C	LRRIQ1	NS	11919	0.0157058	0.05429	0	0	0.001152	0.0002973	1.456	0.00028	1.277	0.35	1.458	0.00055	0.66
exm300519	3	38307398	rs72542450	A/G	SLC22A13	NS	11920	0.00218688	0.001165	0	0	0.00192	0.006837	2.1	0.0017	0.893	0.88	2.291	0.00055	0.21
exm-rs366676	6	88717766	rs366676	T/C	SPACA1	other/GWAS	11919	0.474616	0.6356	0.3275	0.2532	0.4758	0.5684	0.899	0.00024	0.911	0.18	0.9	0.00056	0.97
exm283174	2	241969887	rs185349960	A/G	SNED1	NS	11920	0.000331345	0.000466	0	0.0007455	0	0	5.45	0.00035	NA	NA	5.373	0.00056	0.72
exm621671	7	51096992	rs61737866	A/G	COBL	NS	11918	0.0248575	0.08256	0	0	0.006528	0.001189	0.701	0.00045	0.805	0.39	0.688	0.00057	0.64
exm784051	9	130687485	rs141670007	T/C	PIP5KL1	NS	11919	0.000729056	0.002564	0	0	0	0	3.136	0.0019	1.693	0.61	3.557	0.00058	0.38
exm960832	11	118531367	NA	G/A	TREH	NS	11919	0.00152439	0.001631	0.001241	0	0.001537	0.00327	2.25	0.0039	0.657	0.68	2.624	0.00058	0.15
exm1094158	14	24877699	rs74036628	G/A	NYNRIN	NS	11892	0.0650531	0.1055	0.03598	0.1031	0.02535	0.005648	1.199	0.001	1.086	0.55	1.222	0.00059	0.34
exm2269585	3	184816323	rs2132240	T/C	C3orf70	other	11887	0.453488	0.4812	0.572	0.5368	0.4143	0.3207	1.094	0.0013	1.03	0.66	1.106	0.00059	0.31
exm1608854	22	39138332	rs138708	A/G	SUN2	NS	11920	0.0587806	0.008388	0.04094	0.1759	0.01421	0.0217	0.783	0.00022	0.8	0.18	0.786	0.00061	0.99
exm104817	1	154898899	rs16836525	T/C	PMVK	NS	11890	0.0585735	0.1953	0.001241	0	0.01384	0.003571	0.785	0.0003	0.908	0.56	0.783	0.00061	0.45
exm911450	11	57428771	rs148451233	G/A	CLP1	NS	11920	0.000861498	0.003029	0	0	0	0	3.076	0.0011	2.851	0.15	3.313	0.00061	0.81
exm964493	11	121485599	rs62622819	A/T	SORL1	NS	11920	0.00497018	0.003029	0	0	0.004992	0.01457	0.456	0.0015	0.794	0.65	0.38	0.00061	0.17
exm-rs7567607	2	43638185	rs7567607	C/T	THADA	other/AIMS	11916	0.425116	0.1848	0.6117	0.6588	0.5311	0.3255	1.132	3.9e-05	1.189	0.016	1.115	0.00062	0.4
exm1038005	12	112330774	rs150495619	A/G	MAPKAPK5	NS	11920	0.00722333	0.000233	0.01117	0.02435	0.000384	0	1.563	0.0024	0.811	0.65	1.678	0.00062	0.093
exm-rs7642134	3	86916882	rs7642134	A/G	VGLL3	other/GWAS	11920	0.490126	0.521	0.6166	0.4684	0.533	0.4132	0.919	0.0025	0.992	0.9	0.904	0.00062	0.17
exm272485	2	228560632	rs145288025	T/C	SLC19A3	NS	11920	0.000530152	0.001864	0	0	0	0	3.583	0.0017	NA	NA	4.014	0.00062	0.55
exm1352239	17	72758167	rs41282065	A/G	SLC9A3R1	NS	11920	0.00212061	0.00233	0	0	0.002304	0.004756	0.103	0.00015	<0.001	0.14	0.122	0.00063	0.59
exm1051319	12	130897323	rs11060869	T/C	RIMBP2	NS	11920	0.0222001	0.000466	0.1166	0.05865	0	0.0008918	0.696	0.00096	0.711	0.22	0.666	0.00064	0.8
exm240523	2	170139387	rs111704488	C/A	LRP2	NS	11920	0.0072896	0.0233	0.002481	0	0.002688	0.0002973	1.628	0.00071	1.559	0.19	1.67	0.00065	0.9
