# Supplementary material for: Genome-Wide Testing of Putative Functional Exonic Variants in Relationship with Breast and Prostate Cancer Risk in a Multiethnic Population
Source: PLoS Genet. 2013 Mar 28;9(3):e1003419. doi: 10.1371/journal.pgen.1003419 (PMC3610631; doi:10.1371/journal.pgen.1003419)
Supplement: Table S5 — Gene burden analyses. One hundred strongest associations with (S5.1) Overall breast cancer, (S5.2) ER-positive breast cancer, (S5.3) ER-negative breast cancer, (S5.4) Overall prostate cancer, (S5.5) Advanced prostate cancer and (S5.6) Non-advanced prostate cancer. (XLSX) [file pgen.1003419.s007.xlsx]

## Sheet: Sheet1
Supplemental Table S5: Gene Burden Analyses. One hundred strongest associations with (S5.1) Overall Breast Cancer (S5.2) ER-positive Breast Cancer (S5.3) ER-negative Breast Cancer (S5.4) Overall Prostate Cancer (S5.5) Advanced Prostate Cancer (S5.6) Non-advanced Prostate Cancer
S5.1 Overall Breast Cancer
			All functional variants										Rare functional variants
			rare or common										(MAF < 0.01 overall)
Gene	Chr	No. of SNPs	OR	P	95% LowerCL	95% UpperCL	MAC			Gene	Chr	No. of SNPs	OR	P	95% LowerCL	95% UpperCL	MAC
MMAB	12	8	1.142	4.97e-05	1.071	1.217	10533			FGFBP3	10	5	26.637	8.71e-06	3.293	215.488	10
SLC16A6	17	6	1.098	5.41e-05	1.049	1.149	6045			LDLRAD1	1	10	1.632	2.09e-05	1.295	2.058	212
INS-IGF2	11	4	0.884	0.000124	0.83	0.941	8990			NAALADL1	11	36	0.538	0.000147	0.389	0.745	275
ST3GAL3	1	9	1.141	0.00016	1.066	1.222	5693			UCHL1	4	2	11.168	0.000162	2.343	53.242	10
SPDEF	6	14	1.107	0.000162	1.05	1.167	4024			TXN2	22	2	3.03	0.000182	1.649	5.568	43
UCHL1	4	2	11.168	0.000162	2.343	53.242	10			FAM193B	5	10	0.614	0.000264	0.47	0.8	359
TXN2	22	2	3.03	0.000182	1.649	5.568	43			CCDC27	1	35	1.298	0.000323	1.125	1.496	940
KLK6	19	4	0.701	0.000188	0.582	0.846	832			WNT9A	1	4	2.576	0.000335	1.462	4.539	39
SRRM5	19	14	0.943	0.00023	0.914	0.973	18386			SEC22B	1	5	1.674	0.000427	1.252	2.237	198
ZPLD1	3	14	0.936	0.000236	0.903	0.97	6276			DOK2	8	14	1.79	0.000472	1.286	2.49	166
FAM193B	5	10	0.614	0.000264	0.47	0.8	359			PRKAR2A	3	6	0.224	0.000477	0.09	0.561	64
ZNF142	2	40	0.953	0.000264	0.929	0.978	21980			SIPA1	11	17	0.543	0.00053	0.383	0.771	227
PIGM	1	6	0.843	0.000314	0.768	0.925	2854			APOC3	11	3	2.69	0.000571	1.491	4.856	44
WNT9A	1	4	2.576	0.000335	1.462	4.539	39			UBE2F	2	2	>999.999	0.000584	<0.001	>999.999	3
PRX	19	29	0.921	0.000347	0.88	0.963	9831			LTBP4	19	33	0.698	0.000585	0.568	0.858	604
MAP7D3	23	17	0.936	0.000357	0.902	0.97	11825			ARHGEF12	11	23	1.475	0.000612	1.179	1.845	373
UBE3B	12	18	1.122	0.000373	1.053	1.196	10697			F13A1	6	21	1.728	0.000692	1.255	2.379	168
SIPA1	11	17	0.764	0.0004	0.658	0.887	1147			TBC1D23	3	11	1.737	0.000749	1.255	2.404	159
TNR	1	39	1.073	0.000409	1.032	1.116	19538			LIN9	1	4	0.282	0.000797	0.128	0.62	65
C3orf20	3	31	1.041	0.000434	1.018	1.065	27525			DENND2A	7	26	0.5	0.000813	0.331	0.756	194
PRKAR2A	3	6	0.224	0.000477	0.09	0.561	64			SIRT3	11	11	1.583	0.000948	1.203	2.083	236
POLR3A	10	20	1.282	0.000554	1.113	1.477	1250			NOC2L	1	33	1.395	0.00124	1.138	1.709	371
APOC3	11	3	2.69	0.000571	1.491	4.856	44			CHRND	2	17	0.594	0.00134	0.43	0.819	274
UBE2F	2	2	>999.999	0.000584	<0.001	>999.999	3			MRO	18	13	0.356	0.00141	0.184	0.69	100
TMEM175	4	24	0.813	0.0006	0.722	0.915	1534			CCDC38	12	25	0.64	0.00143	0.485	0.844	376
ZC3H3	8	45	1.038	0.000605	1.016	1.061	34133			EBNA1BP2	1	4	0.536	0.00155	0.362	0.793	187
TRERF1	6	29	0.872	0.000622	0.805	0.943	2878			C10orf91	10	5	1.784	0.00162	1.238	2.57	133
C2orf51	2	9	0.69	0.000653	0.557	0.855	613			CRAMP1L	16	15	1.422	0.00164	1.141	1.771	371
TBC1D23	3	11	1.737	0.000749	1.255	2.404	159			GATM	15	6	5.028	0.00166	1.656	15.262	14
LIN9	1	4	0.282	0.000797	0.128	0.62	65			NOB1	16	9	1.778	0.00166	1.229	2.572	94
CDHR3	7	33	1.054	0.000822	1.022	1.088	13396			ZNF792	19	23	1.337	0.00169	1.114	1.604	527
C9orf11	9	13	1.149	0.000924	1.058	1.247	1938			NICN1	3	3	6.527	0.00171	1.708	24.942	11
SH2D4A	8	19	1.072	0.000927	1.029	1.117	8036			ADRA2C	4	2	3.428	0.00176	1.511	7.775	24
NRIP1	21	33	1.134	0.00096	1.052	1.223	4168			ZNF19	16	10	0.601	0.00185	0.435	0.831	256
PROK1	1	8	0.63	0.00108	0.477	0.833	377			TAS2R60	7	9	1.874	0.00195	1.249	2.814	99
MZF1	19	18	1.08	0.00111	1.031	1.132	13699			KIF4B	5	21	0.711	0.00204	0.572	0.884	537
EPS8L1	19	20	1.074	0.00116	1.029	1.121	12668			UQCRC2	16	7	0.192	0.00216	0.059	0.623	39
CASR	3	13	1.118	0.00121	1.045	1.195	6719			PROK2	3	4	1.924	0.00222	1.256	2.947	95
FBXO11	2	4	0.64	0.00137	0.486	0.843	402			CADM3	1	6	0.61	0.00234	0.442	0.841	236
SEC14L4	22	17	1.049	0.00152	1.018	1.08	9815			SCRN3	2	14	1.532	0.00242	1.16	2.022	235
TLL1	4	15	0.893	0.00153	0.833	0.958	5619			GPR128	3	29	1.29	0.00246	1.093	1.521	601
SNTN	3	3	1.464	0.00164	1.153	1.858	298			MMP2	16	14	0.686	0.00249	0.536	0.877	452
NOB1	16	9	1.778	0.00166	1.229	2.572	94			ACSBG2	19	33	1.256	0.00253	1.083	1.457	713
EPHX1	1	16	1.105	0.00168	1.038	1.175	7303			RSL1D1	16	15	1.373	0.00261	1.114	1.691	293
ERC2	3	10	1.176	0.00168	1.063	1.302	1997			ACVR1B	12	2	5.492	0.00263	1.588	18.999	11
NICN1	3	3	6.527	0.00171	1.708	24.942	11			GTF2F1	19	11	0.485	0.00263	0.3	0.785	138
ZNF404	19	12	0.933	0.00173	0.893	0.974	13103			LPPR3	19	11	0.514	0.00265	0.331	0.8	153
ADRA2C	4	2	3.428	0.00176	1.511	7.775	24			CHST15	10	14	2.064	0.00271	1.274	3.343	75
UBE2NL	23	4	0.891	0.0019	0.829	0.959	4783			TPP2	13	9	2.043	0.00278	1.266	3.297	73
MGAT4A	2	12	0.802	0.00194	0.698	0.922	1153			HDAC6	23	9	2.188	0.00283	1.293	3.702	62
PLEKHO2	15	21	0.891	0.00222	0.827	0.959	8536			FKSG83	6	5	2.256	0.00285	1.251	4.066	25
PROK2	3	4	1.924	0.00222	1.256	2.947	95			THEM5	1	7	1.492	0.00286	1.145	1.945	285
CD27	12	5	0.865	0.00231	0.789	0.95	2895			XAF1	17	12	0.726	0.00292	0.587	0.898	519
CADM3	1	6	0.61	0.00234	0.442	0.841	236			TNFSF10	3	7	2.577	0.00294	1.352	4.913	39
IMMT	2	9	0.803	0.00235	0.697	0.925	1194			MGAT4A	2	12	0.661	0.00301	0.502	0.871	319
MMP2	16	14	0.686	0.00249	0.536	0.877	452			TNFAIP3	6	15	0.484	0.00307	0.297	0.791	130
PDZD7	10	15	1.101	0.00252	1.034	1.173	6944			CNR1	6	2	7.875	0.00319	1.568	39.538	8
ACVR1B	12	2	5.492	0.00263	1.588	18.999	11			PARVG	22	8	0.486	0.00321	0.298	0.793	138
GTF2F1	19	11	0.485	0.00263	0.3	0.785	138			OR2J2	6	5	1.356	0.00341	1.105	1.664	464
LDLRAD1	1	10	1.277	0.00273	1.087	1.498	649			RPL8	8	3	>999.999	0.00349	<0.001	>999.999	3
KCTD11	17	3	0.612	0.00274	0.442	0.847	286			GRIN2B	12	9	3.475	0.00356	1.429	8.452	20
TPP2	13	9	2.043	0.00278	1.266	3.297	73			EML1	14	9	1.744	0.00361	1.194	2.548	124
LRIT3	4	19	0.946	0.00287	0.913	0.981	32534			LMF2	22	32	1.361	0.00369	1.104	1.676	418
FAM111A	11	17	1.229	0.00311	1.072	1.41	1002			ZNF300	5	6	1.788	0.00381	1.2	2.664	111
PCNXL2	1	54	0.953	0.00313	0.923	0.984	16756			LSMD1	17	4	0.384	0.00385	0.196	0.753	72
CNR1	6	2	7.875	0.00319	1.568	39.538	8			SH3RF3	2	15	0.594	0.00386	0.415	0.849	205
GINS1	20	3	1.126	0.00321	1.04	1.218	5098			KRT40	17	19	0.75	0.00397	0.616	0.913	623
PARVG	22	8	0.486	0.00321	0.298	0.793	138			PGM2L1	11	9	0.373	0.00406	0.185	0.75	81
TAT	16	7	0.865	0.00324	0.786	0.953	2676			ATAD3B	1	15	1.418	0.00417	1.115	1.802	303
OR6C2	12	9	1.125	0.00334	1.04	1.218	3829			PLCL2	3	19	1.28	0.00418	1.08	1.515	709
ZNF302	19	7	1.264	0.00347	1.08	1.479	772			GNL3L	23	9	0.527	0.00424	0.337	0.823	94
C9orf3	9	27	0.865	0.00349	0.785	0.954	2621			LONP2	16	9	0.356	0.00428	0.17	0.746	74
ASPRV1	2	11	1.103	0.00351	1.033	1.178	6892			VSTM4	10	13	1.604	0.00428	1.157	2.225	157
GRIN2B	12	9	3.475	0.00356	1.429	8.452	20			TNIK	3	8	2.024	0.00429	1.236	3.313	67
ZPBP2	17	9	1.091	0.00361	1.029	1.156	9110			STOX1	10	22	0.793	0.00435	0.675	0.93	861
SSH1	12	21	0.802	0.00362	0.692	0.931	1107			TKTL1	23	5	1.904	0.00453	1.212	2.991	82
LPPR3	19	11	0.738	0.00385	0.601	0.908	549			TFDP1	13	3	5.935	0.00468	1.469	23.989	9
SAMM50	22	12	0.913	0.00385	0.859	0.971	10982			C13orf40	13	90	0.867	0.00469	0.785	0.957	2046
IFLTD1	12	15	0.891	0.00408	0.823	0.965	1458			DCAF5	14	14	0.511	0.00469	0.318	0.821	130
C11orf24	11	17	0.901	0.00423	0.838	0.968	16047			STAP1	4	5	4.881	0.00476	1.452	16.41	12
GNL3L	23	9	0.527	0.00424	0.337	0.823	94			PLAGL2	20	4	5.092	0.00486	1.46	17.763	11
SERTAD1	19	4	0.905	0.00427	0.845	0.969	10253			ZCCHC17	1	2	2.736	0.00487	1.321	5.669	30
LONP2	16	9	0.356	0.00428	0.17	0.746	74			PTPN18	2	16	1.483	0.00494	1.125	1.956	229
LASP1	17	3	0.896	0.0043	0.831	0.966	5056			RPH3AL	17	8	0.476	0.00501	0.28	0.809	110
C22orf31	22	9	1.125	0.00451	1.037	1.22	3649			ZNF844	19	10	1.723	0.00506	1.172	2.532	116
ETFDH	4	7	0.884	0.00453	0.811	0.962	5947			HIF1A	14	13	0.676	0.00518	0.513	0.891	292
TKTL1	23	5	1.904	0.00453	1.212	2.991	82			SPATS2L	2	9	0.587	0.00524	0.402	0.857	209
MGP	12	6	0.911	0.00455	0.855	0.972	7312			ACYP2	2	3	3.058	0.00529	1.342	6.969	24
THEM5	1	7	1.107	0.00464	1.032	1.188	4805			DPP6	7	7	0.622	0.00531	0.444	0.871	245
TFDP1	13	3	5.935	0.00468	1.469	23.989	9			PLEKHO2	15	21	0.662	0.00531	0.494	0.886	288
DCAF5	14	14	0.511	0.00469	0.318	0.821	130			TULP1	6	21	0.547	0.00535	0.356	0.842	164
STAP1	4	5	4.881	0.00476	1.452	16.41	12			BCORL1	23	18	0.55	0.00536	0.358	0.844	94
MECOM	3	19	0.885	0.00485	0.813	0.964	3275			MDM4	1	12	1.516	0.00546	1.128	2.037	206
PLAGL2	20	4	5.092	0.00486	1.46	17.763	11			EPGN	4	4	3.348	0.00547	1.363	8.227	20
ZCCHC17	1	2	2.736	0.00487	1.321	5.669	30			TRERF1	6	29	0.809	0.00556	0.696	0.941	803
IDH3G	23	4	0.76	0.00507	0.627	0.922	504			SCAPER	15	24	1.25	0.00559	1.067	1.464	852
ZNF674	23	8	1.255	0.00511	1.069	1.474	482			CHMP6	17	4	2.536	0.0056	1.285	5.004	35
RSL1D1	16	15	1.274	0.00514	1.074	1.51	537			CCPG1	15	15	1.338	0.00563	1.088	1.645	455
ZNF45	19	18	0.937	0.00524	0.895	0.981	37319			AP3M1	10	4	2.698	0.00564	1.301	5.595	30
SENP3	17	7	1.41	0.00542	1.106	1.799	289			C1orf210	1	5	0.71	0.00564	0.556	0.906	443
S5.2 ER-postive Breast Cancer
			All functional variants										Rare functional variants
			rare or common										(MAF < 0.01 overall)
Gene	Chr	No. of SNPs	OR	P	95% LowerCL	95% UpperCL	MAC			Gene	Chr	No. of SNPs	OR	P	95% LowerCL	95% UpperCL	MAC
SNTN	3	3	1.758	3.25e-05	1.342	2.302	264			FGFBP3	10	5	35.35	6.21e-07	4.19	298.211	8
TXN2	22	2	3.741	3.73e-05	1.914	7.31	36			LTBP4	19	33	0.528	1.99e-05	0.392	0.712	536
SPATA16	3	20	0.93	5.05e-05	0.898	0.963	14642			TXN2	22	2	3.741	3.73e-05	1.914	7.31	36
APOC3	11	3	3.255	0.000257	1.669	6.346	36			OR6C65	12	4	2.439	8.71e-05	1.536	3.871	78
APOC4	19	6	0.847	0.000266	0.775	0.926	14618			PRC1	15	13	2.021	0.000202	1.384	2.952	130
C19orf50	19	5	0.868	0.000279	0.804	0.937	9262			CHRND	2	17	0.421	0.000246	0.262	0.678	246
ACVR1B	12	2	7.855	0.000351	2.075	29.733	9			APOC3	11	3	3.255	0.000257	1.669	6.346	36
SIPA1	11	17	0.705	0.000483	0.578	0.859	1029			SEC22B	1	5	1.842	0.000323	1.313	2.585	169
EMR3	19	19	1.127	0.000493	1.054	1.206	9547			ACVR1B	12	2	7.855	0.000351	2.075	29.733	9
STARD8	23	36	1.22	0.000521	1.09	1.365	1231			ZNF300	5	6	2.244	0.000421	1.414	3.561	98
CEP57	11	13	0.862	0.000532	0.792	0.937	5496			RPL8	8	3	>999.999	0.000461	<0.001	>999.999	2
GK2	4	18	1.845	0.000613	1.292	2.636	158			LPPR3	19	11	0.302	0.000548	0.147	0.62	137
NRD1	1	16	1.656	0.000678	1.234	2.221	258			TNFSF10	3	7	3.299	0.000607	1.605	6.781	34
KLK6	19	4	0.652	0.000764	0.507	0.838	757			GK2	4	18	1.845	0.000613	1.292	2.636	158
PCNX	14	43	0.648	0.000773	0.503	0.836	650			ACSBG2	19	33	1.364	0.000638	1.14	1.632	626
THEM5	1	7	1.16	0.000804	1.063	1.265	4217			NRD1	1	16	1.656	0.000678	1.234	2.221	258
ZNF142	2	40	0.947	0.000874	0.917	0.978	19398			ATP2A3	17	20	0.534	0.000755	0.368	0.774	337
OXER1	2	21	1.139	0.000885	1.055	1.23	7200			PCNX	14	43	0.648	0.000773	0.503	0.836	650
INS-IGF2	11	4	0.877	0.000975	0.811	0.948	7903			TULP1	6	21	0.314	0.000832	0.153	0.643	147
TAT	16	7	0.812	0.00098	0.718	0.919	2356			F13A1	6	21	1.884	0.000867	1.29	2.751	143
MAP7D3	23	17	0.93	0.00103	0.891	0.971	9581			PRDM16	1	29	1.639	0.000873	1.221	2.199	275
CNFN	19	2	5.318	0.00121	1.734	16.304	13			SIPA1	11	17	0.44	0.000876	0.267	0.724	206
GSDMA	17	10	0.918	0.00123	0.871	0.967	22288			CNFN	19	2	5.318	0.00121	1.734	16.304	13
GINS1	20	3	1.175	0.00125	1.065	1.295	4442			C11orf65	11	9	0.488	0.00129	0.312	0.763	240
C11orf65	11	9	0.488	0.00129	0.312	0.763	240			LIN9	1	4	0.139	0.00137	0.034	0.569	60
SPRR3	1	8	1.127	0.00134	1.048	1.213	8018			TEX12	11	2	2.009	0.00141	1.296	3.115	91
LIN9	1	4	0.139	0.00137	0.034	0.569	60			SPATA13	13	26	1.575	0.00151	1.187	2.091	291
TEX12	11	2	2.009	0.00141	1.296	3.115	91			PSG9	19	9	1.56	0.00176	1.178	2.066	278
AKR1E2	10	16	0.849	0.00162	0.767	0.94	3297			TBC1D23	3	11	1.834	0.00182	1.246	2.701	134
TBC1D23	3	11	1.834	0.00182	1.246	2.701	134			HLA-DRB5	6	2	>999.999	0.00186	<0.001	>999.999	1
HLA-DRB5	6	2	>999.999	0.00186	<0.001	>999.999	1			CFI	4	22	1.508	0.0019	1.161	1.959	314
UCHL1	4	2	9.604	0.0019	1.71	53.925	6			UCHL1	4	2	9.604	0.0019	1.71	53.925	6
OR1J2	9	12	1.151	0.00201	1.053	1.259	5024			WDR90	16	56	0.715	0.00203	0.578	0.886	777
ATF1	12	6	0.884	0.00202	0.817	0.956	7603			UBXN2A	2	9	1.94	0.00205	1.261	2.984	109
UBXN2A	2	9	1.94	0.00205	1.261	2.984	109			ZNF155	19	9	1.654	0.00221	1.194	2.29	192
LPPR3	19	11	0.656	0.00214	0.5	0.86	488			LCMT1	16	2	5.772	0.00238	1.611	20.681	10
SPINK6	5	2	1.162	0.00218	1.056	1.28	5456			CSMD1	8	72	1.323	0.00239	1.104	1.586	722
CATSPER2	15	11	0.858	0.0022	0.778	0.946	3726			SCRN3	2	14	1.68	0.00239	1.197	2.358	203
CHRNA10	11	21	1.279	0.00229	1.091	1.498	1009			GRID2	4	11	1.791	0.00245	1.22	2.628	144
SLC16A6	17	6	1.091	0.0023	1.032	1.154	5223			ZACN	17	29	1.556	0.00248	1.166	2.076	287
CDHR3	7	33	1.061	0.00238	1.021	1.103	11667			MRPS26	20	3	5.82	0.0025	1.61	21.046	10
LCMT1	16	2	5.772	0.00238	1.611	20.681	10			LPA	6	39	1.398	0.00262	1.123	1.741	481
GFAP	17	11	0.881	0.00241	0.811	0.956	5846			AMN	14	8	1.669	0.00263	1.191	2.337	192
MRPS26	20	3	5.82	0.0025	1.61	21.046	10			GEMIN5	5	41	0.747	0.00273	0.616	0.905	828
RPS6KB2	11	12	1.316	0.00257	1.1	1.574	714			BCAN	1	19	1.447	0.00279	1.134	1.846	352
ZC3H3	8	45	1.042	0.00258	1.014	1.07	29825			RALBP1	18	6	0.243	0.00281	0.089	0.664	95
PIGM	1	6	0.837	0.00259	0.745	0.94	2540			ASMTL	23	6	0.47	0.00284	0.284	0.78	102
ZNF674	23	8	1.338	0.0026	1.104	1.622	390			MRPL45	17	13	2.527	0.00287	1.336	4.779	44
MAGI1	3	32	1.278	0.00262	1.089	1.5	1212			ADRA2C	4	2	3.649	0.00292	1.468	9.066	19
AMN	14	8	1.669	0.00263	1.191	2.337	192			CA6	1	10	4.322	0.00294	1.515	12.336	15
OR10V1	11	14	1.172	0.00267	1.057	1.3	2729			TBX5	12	13	0.564	0.003	0.385	0.828	294
SLC39A6	18	9	1.392	0.00268	1.12	1.729	644			CBR4	4	7	1.744	0.00303	1.202	2.529	140
PROK1	1	8	0.559	0.0028	0.38	0.823	345			CEACAM16	19	10	2.044	0.00303	1.263	3.31	90
ADRA2C	4	2	3.649	0.00292	1.468	9.066	19			HIVEP3	1	60	1.311	0.00311	1.095	1.569	809
SLC36A4	11	19	0.728	0.00296	0.59	0.898	756			TSGA10IP	11	17	0.457	0.00315	0.268	0.779	196
TBX5	12	13	0.564	0.003	0.385	0.828	294			ACSM2A	16	4	8.862	0.00334	1.566	50.149	6
CEACAM16	19	10	2.044	0.00303	1.263	3.31	90			ZUFSP	6	10	1.98	0.00337	1.241	3.159	95
PLXDC1	17	15	1.197	0.00304	1.063	1.348	1820			ADSSL1	14	14	0.527	0.00342	0.341	0.815	293
POLDIP3	22	9	0.817	0.00307	0.715	0.934	2091			TKTL1	23	5	2.092	0.00342	1.263	3.463	63
ABCA7	19	81	1.049	0.00317	1.016	1.082	25226			SIPA1L2	1	31	0.624	0.00345	0.453	0.858	359
EFCAB6	22	64	1.058	0.0033	1.019	1.099	18649			ZNF677	19	14	1.648	0.00347	1.175	2.312	240
EMILIN3	20	20	1.128	0.00339	1.041	1.223	6053			VSTM4	10	13	1.751	0.00355	1.196	2.565	135
PDZD7	10	15	1.123	0.00341	1.039	1.214	6083			PLAGL2	20	4	6.278	0.00357	1.538	25.632	8
TKTL1	23	5	2.092	0.00342	1.263	3.463	63			MICALL2	7	46	0.744	0.00367	0.61	0.909	890
BDP1	5	76	0.971	0.0035	0.952	0.99	35632			CCDC27	1	35	1.297	0.00384	1.087	1.548	811
PLAGL2	20	4	6.278	0.00357	1.538	25.632	8			ZNF792	19	23	1.385	0.00388	1.108	1.73	459
YME1L1	10	5	1.312	0.00363	1.092	1.577	807			PHLDB2	3	32	1.337	0.00393	1.097	1.629	807
ADSL	22	10	1.546	0.00369	1.149	2.079	298			CD3EAP	19	16	1.642	0.00398	1.163	2.318	137
SPG20	13	10	1.827	0.00399	1.204	2.772	131			SPG20	13	10	1.827	0.00399	1.204	2.772	131
HADHA	2	16	1.897	0.00408	1.217	2.956	112			HADHA	2	16	1.897	0.00408	1.217	2.956	112
TLL1	4	15	0.879	0.00417	0.805	0.96	4983			CSTF2T	10	6	0.341	0.00421	0.157	0.738	96
GLI1	12	21	0.828	0.00419	0.727	0.942	15683			DOK2	8	14	1.811	0.00421	1.199	2.734	139
CSTF2T	10	6	0.341	0.00421	0.157	0.738	96			SAMD13	1	2	>999.999	0.00422	<0.001	>999.999	2
PLCH1	3	25	1.198	0.00426	1.058	1.356	1319			ACAD10	12	37	1.366	0.00424	1.101	1.694	364
PKD2	4	11	0.648	0.00428	0.48	0.874	404			USP20	9	24	0.603	0.00425	0.425	0.857	320
TFAP2A	6	2	>999.999	0.00433	<0.001	>999.999	1			RAB11FIP1	8	42	0.726	0.00427	0.583	0.905	789
ARHGEF4	2	19	0.838	0.00435	0.741	0.946	2076			SH3RF3	2	15	0.503	0.00429	0.311	0.813	186
TRIM67	1	5	0.4	0.00437	0.209	0.768	123			CHN2	7	9	2.74	0.0043	1.319	5.691	32
OR52B2	11	15	0.798	0.00442	0.683	0.933	1548			EBNA1BP2	1	4	0.465	0.00432	0.272	0.797	171
NICN1	3	3	6.257	0.00447	1.48	26.449	8			TFAP2A	6	2	>999.999	0.00433	<0.001	>999.999	1
LOC285033	2	4	1.616	0.00459	1.156	2.259	217			OR6K2	1	22	1.576	0.00436	1.15	2.162	257
FBRSL1	12	8	1.101	0.00471	1.03	1.176	2490			TRIM67	1	5	0.4	0.00437	0.209	0.768	123
SAMM50	22	12	0.895	0.00472	0.829	0.967	9626			TMEM161A	19	12	1.868	0.00442	1.205	2.897	98
ZPLD1	3	14	0.938	0.00472	0.897	0.981	5604			NICN1	3	3	6.257	0.00447	1.48	26.449	8
RNF144A	2	3	0.867	0.00473	0.786	0.957	3371			NHEDC2	4	19	1.43	0.0045	1.114	1.836	324
TLX1	10	4	2.111	0.00476	1.243	3.585	64			TGFB1	19	4	>999.999	0.00451	<0.001	>999.999	2
EDAR	2	9	0.865	0.00478	0.783	0.957	6344			CHRNA10	11	21	1.37	0.00454	1.101	1.704	520
LASP1	17	3	0.873	0.00479	0.795	0.96	4442			LOC285033	2	4	1.616	0.00459	1.156	2.259	217
BCKDK	16	3	>999.999	0.0048	<0.001	>999.999	2			CGRRF1	14	6	0.428	0.00463	0.234	0.783	119
EPHX1	1	16	1.117	0.00492	1.034	1.206	6358			ATP11A	13	27	0.6	0.00467	0.419	0.858	349
ACSM1	16	25	1.112	0.00505	1.032	1.197	6137			EPS8L1	19	20	1.497	0.0047	1.13	1.985	305
LRIT3	4	19	0.938	0.00506	0.896	0.981	28557			OXTR	3	12	1.632	0.00476	1.157	2.3	199
INSM1	20	2	14.599	0.00512	1.271	167.629	3			TLX1	10	4	2.111	0.00476	1.243	3.585	64
C18orf21	18	5	0.882	0.00525	0.808	0.963	4750			BCKDK	16	3	>999.999	0.0048	<0.001	>999.999	2
ASMT	23	9	1.941	0.00534	1.208	3.118	74			MC2R	18	9	2.165	0.00481	1.25	3.751	60
PYGB	20	21	0.933	0.00577	0.888	0.98	7723			KRTAP19-8	21	4	14.398	0.00484	1.276	162.504	3
C4orf27	4	5	0.861	0.00583	0.774	0.958	3255			HDAC6	23	9	2.294	0.00488	1.268	4.15	46
PAQR7	1	12	1.244	0.00592	1.064	1.453	1364			NEUROG3	10	3	4.076	0.00491	1.416	11.738	14
KIAA0494	1	9	0.6	0.00593	0.416	0.867	370			PLD1	3	28	1.264	0.005	1.072	1.49	699
MBD4	3	16	0.911	0.00594	0.853	0.974	5931			INSM1	20	2	14.599	0.00512	1.271	167.629	3
S5.3 ER-negative Breast Cancer
			All functional variants										Rare functional variants
			rare or common										(MAF < 0.01 overall)
Gene	Chr	No. of SNPs	OR	P	95% LowerCL	95% UpperCL	MAC			Gene	Chr	No. of SNPs	OR	P	95% LowerCL	95% UpperCL	MAC
EGR2	10	4	32.272	1.24e-11	6.905	150.826	7			EGR2	10	4	32.272	1.24e-11	6.905	150.826	7
CNR1	6	2	36.506	1.68e-10	6.439	206.982	6			CNR1	6	2	36.506	1.68e-10	6.439	206.982	6
MMAB	12	8	1.37	2.04e-05	1.185	1.585	7845			FKSG83	6	5	4.399	1.46e-08	2.242	8.63	21
ATP6V1H	8	11	3.236	2.09e-05	1.826	5.734	109			GATM	15	6	16.177	4.83e-07	3.767	69.475	8
UBE2F	2	2	>999.999	2.69e-05	<0.001	>999.999	1			ACSBG1	15	11	2.629	5.33e-07	1.774	3.895	252
MRPL20	1	3	5.648	6.36e-05	2.184	14.607	26			PRODH	22	14	3.724	1.88e-06	2.089	6.638	86
POP5	12	3	7.238	9.67e-05	2.287	22.912	18			TEX264	3	4	42.732	6.41e-06	3.253	561.374	3
FOXF2	6	2	26.512	0.00012	2.279	308.422	3			TSGA13	7	8	5.762	1.22e-05	2.384	13.928	28
SIRT1	10	8	2.675	0.000138	1.581	4.525	126			C10orf91	10	5	3.135	1.24e-05	1.817	5.408	104
PUS1	12	8	2.654	0.000149	1.571	4.482	148			BRP44L	6	3	38.69	1.64e-05	3.015	496.538	3
PEX11A	15	6	8.694	0.00025	2.21	34.194	12			ATP6V1H	8	11	3.236	2.09e-05	1.826	5.734	109
C10orf91	10	5	1.564	0.000303	1.221	2.003	619			UBE2F	2	2	>999.999	2.69e-05	<0.001	>999.999	1
SMAD1	4	3	16.573	0.000304	2.196	125.063	4			LDLRAD1	1	10	2.055	5.41e-05	1.421	2.972	156
DIMT1L	5	3	14.368	0.000328	2.214	93.228	5			MRPL20	1	3	5.648	6.36e-05	2.184	14.607	26
OTX2	14	3	28.193	0.000343	1.735	458.101	2			POP5	12	3	7.238	9.67e-05	2.287	22.912	18
LRRC26	9	3	4.192	0.000386	1.78	9.871	37			MS4A12	11	7	4.015	0.000119	1.874	8.603	44
POLR3A	10	20	1.616	0.000408	1.236	2.114	989			AGMAT	1	8	2.794	0.00012	1.619	4.824	119
SFN	1	3	3.359	0.000433	1.5	7.524	17			FOXF2	6	2	26.512	0.00012	2.279	308.422	3
UBE3B	12	18	1.295	0.000449	1.12	1.496	7956			SIRT1	10	8	2.675	0.000138	1.581	4.525	126
ACOT2	14	2	>999.999	0.00045	<0.001	>999.999	1			CARD8	19	18	2.147	0.000144	1.429	3.226	211
ANKRD49	11	2	5.27	0.000485	1.869	14.859	21			PUS1	12	8	2.654	0.000149	1.571	4.482	148
TUBGCP3	13	10	5.229	0.000498	1.863	14.676	22			AZI1	17	45	1.781	0.000169	1.31	2.421	417
MON1A	3	6	3.214	0.000552	1.599	6.461	66			DCDC1	11	10	2.831	0.000248	1.581	5.069	123
TMEM60	7	2	6.109	0.000553	1.899	19.646	15			PEX11A	15	6	8.694	0.00025	2.21	34.194	12
ZNF660	3	8	3.701	0.000623	1.645	8.328	40			AXIN1	16	15	2.097	0.000272	1.395	3.154	251
SERTAD3	19	2	27.452	0.000638	1.605	469.494	2			SMAD1	4	3	16.573	0.000304	2.196	125.063	4
PCDH12	5	43	1.154	0.000708	1.062	1.255	7900			CALHM1	10	15	3.786	0.000312	1.742	8.225	51
CPSF3L	1	11	3.066	0.00086	1.534	6.128	67			DIMT1L	5	3	14.368	0.000328	2.214	93.228	5
NTSR2	2	14	1.494	0.000875	1.178	1.894	1691			IGFL1	19	5	2.924	0.00033	1.585	5.395	83
DRD1	5	4	3.528	0.0009	1.599	7.785	44			OTX2	14	3	28.193	0.000343	1.735	458.101	2
HRH4	18	8	1.215	0.000909	1.082	1.365	2383			LRRC26	9	3	4.192	0.000386	1.78	9.871	37
CD247	1	5	4.068	0.000928	1.658	9.98	40			SEC22B	1	5	2.391	0.000395	1.451	3.937	139
SLC11A1	2	27	1.432	0.00096	1.156	1.774	1441			PTRH1	9	4	8.178	0.000432	2.041	32.767	10
FLT1	13	20	2.196	0.00102	1.351	3.569	147			SFN	1	3	3.359	0.000433	1.5	7.524	17
DYDC1	10	4	2.698	0.00103	1.449	5.023	84			ACOT2	14	2	>999.999	0.00045	<0.001	>999.999	1
RHBDD2	7	7	2.778	0.00108	1.465	5.266	93			PPP3CC	8	12	2.035	0.000479	1.353	3.061	246
PCDHGA7	5	17	1.282	0.00122	1.103	1.491	10113			ANKRD49	11	2	5.27	0.000485	1.869	14.859	21
ADAMTS1	21	21	1.217	0.00125	1.08	1.372	6345			TUBGCP3	13	10	5.229	0.000498	1.863	14.676	22
OR2D3	11	12	0.866	0.00127	0.793	0.945	14416			C16orf73	16	10	2.052	0.000523	1.355	3.109	257
HSPB2	11	5	3.08	0.00128	1.499	6.326	69			MON1A	3	6	3.214	0.000552	1.599	6.461	66
KLF14	7	3	0.551	0.0013	0.381	0.796	923			TMEM60	7	2	6.109	0.000553	1.899	19.646	15
STK17A	7	11	1.279	0.00135	1.1	1.488	3759			SLMAP	3	12	4.067	0.000565	1.721	9.606	36
TAS2R60	7	9	1.913	0.00138	1.276	2.869	245			ZNF660	3	8	3.701	0.000623	1.645	8.328	40
ZAP70	2	5	7.113	0.00141	1.766	28.646	10			SERTAD3	19	2	27.452	0.000638	1.605	469.494	2
OR8S1	12	17	1.112	0.00161	1.041	1.189	21442			TTC18	10	17	2.271	0.000676	1.397	3.691	162
ALOX5	10	9	1.668	0.00168	1.208	2.302	524			MATK	19	4	19.84	0.000677	1.751	224.853	3
WNT9A	1	4	3.035	0.00169	1.36	6.773	22			BAAT	9	11	2.114	0.000857	1.347	3.318	211
C3	19	24	1.362	0.0017	1.122	1.654	1676			CPSF3L	1	11	3.066	0.00086	1.534	6.128	67
PIK3C3	18	8	3.876	0.00174	1.558	9.644	32			NKAIN4	20	10	3.537	0.000883	1.602	7.806	47
C22orf24	22	5	1.294	0.00175	1.101	1.521	3237			DRD1	5	4	3.528	0.0009	1.599	7.785	44
CXorf23	23	6	2.135	0.00184	1.306	3.49	97			CD247	1	5	4.068	0.000928	1.658	9.98	40
METAP1	4	3	13.196	0.00184	1.686	103.278	4			FLT1	13	20	2.196	0.00102	1.351	3.569	147
TTBK1	6	11	1.255	0.00184	1.088	1.449	5596			DYDC1	10	4	2.698	0.00103	1.449	5.023	84
OR2J2	6	5	1.456	0.00185	1.148	1.848	1079			GPC4	23	4	>999.999	0.00104	<0.001	>999.999	2
DNASE2	19	5	2.36	0.00186	1.352	4.118	127			TMEM132E	17	12	3.513	0.00105	1.581	7.806	41
MAPK7	17	10	2.115	0.00191	1.305	3.429	186			RHBDD2	7	7	2.778	0.00108	1.465	5.266	93
CYP2U1	4	9	1.92	0.00195	1.261	2.922	315			ITGB3	17	16	2.099	0.00109	1.331	3.312	194
SERPINA11	14	8	1.278	0.00197	1.094	1.493	3943			MPEG1	11	17	1.788	0.00114	1.254	2.551	359
C21orf62	21	8	4.231	0.00211	1.56	11.477	26			ASIP	20	2	>999.999	0.00125	<0.001	>999.999	1
RNF14	5	7	2.673	0.00212	1.395	5.121	76			HSPB2	11	5	3.08	0.00128	1.499	6.326	69
SULT1E1	4	3	5.232	0.00225	1.611	16.986	15			CCDC27	1	35	1.555	0.00129	1.186	2.039	712
NDUFB4	3	2	11.556	0.0024	1.587	84.14	4			FLVCR1	1	10	3.422	0.00137	1.541	7.596	44
CRYBB1	22	8	2.754	0.00249	1.361	5.573	42			ZAP70	2	5	7.113	0.00141	1.766	28.646	10
PSMC3IP	17	5	1.456	0.00258	1.139	1.862	1090			SIX6	14	4	2.658	0.0015	1.42	4.976	91
MFF	2	10	0.768	0.00259	0.647	0.912	4097			UBR7	14	4	3.904	0.00157	1.575	9.68	34
SPATS2L	2	9	0.486	0.00264	0.301	0.787	601			EGFLAM	5	36	0.512	0.00162	0.334	0.782	698
HEXIM2	17	4	2.119	0.00265	1.284	3.499	188			KIAA0319	6	34	1.748	0.00165	1.228	2.487	418
HACE1	6	4	2.688	0.00273	1.37	5.275	74			WNT9A	1	4	3.035	0.00169	1.36	6.773	22
C20orf94	20	9	1.227	0.00276	1.072	1.403	2258			FES	15	17	2.036	0.00174	1.269	3.267	91
MPEG1	11	17	1.244	0.00277	1.078	1.436	6325			PIK3C3	18	8	3.876	0.00174	1.558	9.644	32
APOC3	11	3	3.816	0.00287	1.466	9.932	25			ARHGEF12	11	23	1.882	0.00178	1.258	2.816	280
BLVRA	7	12	1.289	0.0029	1.09	1.525	3207			ZNF577	19	19	1.877	0.00179	1.256	2.807	303
AQP3	9	2	19.909	0.00294	1.231	322.017	2			CXorf23	23	6	2.135	0.00184	1.306	3.49	97
RAB41	23	3	>999.999	0.00302	<0.001	>999.999	1			METAP1	4	3	13.196	0.00184	1.686	103.278	4
KIAA1530	4	39	0.832	0.00317	0.736	0.94	9026			OTOL1	3	10	2.022	0.00185	1.28	3.194	173
LPAR2	19	4	3.611	0.00321	1.452	8.982	33			DNASE2	19	5	2.36	0.00186	1.352	4.118	127
SPRY4	5	8	2.07	0.00321	1.263	3.393	167			ASPRV1	2	11	2.722	0.00188	1.412	5.248	81
BRI3	7	4	5.592	0.00325	1.543	20.264	16			NAPG	18	7	2.625	0.00189	1.393	4.946	108
ESD	13	5	1.296	0.00326	1.09	1.541	3168			MAPK7	17	10	2.115	0.00191	1.305	3.429	186
CSE1L	20	3	6.262	0.00335	1.553	25.246	10			LRP2	2	126	0.723	0.00192	0.588	0.888	2222
GNG11	7	2	5.004	0.00342	1.528	16.387	16			XIRP2	2	120	1.332	0.00207	1.109	1.6	1454
TNPO2	19	3	2.15	0.00344	1.269	3.642	137			C21orf62	21	8	4.231	0.00211	1.56	11.477	26
AACS	12	15	0.761	0.00346	0.633	0.914	3254			RNF14	5	7	2.673	0.00212	1.395	5.121	76
SYNGR4	19	10	0.625	0.00348	0.454	0.859	1253			CEP85	1	19	1.941	0.00216	1.261	2.986	249
DNAH14	1	59	1.045	0.00354	1.014	1.076	67315			CSRNP2	12	11	2.11	0.0022	1.295	3.437	199
PTK2B	8	30	1.264	0.00354	1.08	1.481	12182			SULT1E1	4	3	5.232	0.00225	1.611	16.986	15
LYSMD3	5	7	1.681	0.00357	1.181	2.392	416			ABCG4	11	10	3.591	0.00232	1.472	8.76	27
UMPS	3	10	1.258	0.00357	1.078	1.468	3943			KLK3	19	11	2.486	0.00237	1.356	4.558	109
ZPBP2	17	9	1.206	0.00358	1.063	1.368	6933			NDUFB4	3	2	11.556	0.0024	1.587	84.14	4
DOPEY2	21	65	0.873	0.0036	0.796	0.957	7686			CRYBB1	22	8	2.754	0.00249	1.361	5.573	42
TMEM62	15	10	3.214	0.00364	1.401	7.37	45			EPB42	15	18	2.071	0.00264	1.274	3.366	154
PCYOX1L	5	6	1.367	0.00369	1.106	1.691	1470			HEXIM2	17	4	2.119	0.00265	1.284	3.499	188
BOC	3	35	1.33	0.0037	1.096	1.614	1750			POLR1B	2	16	1.75	0.00267	1.209	2.535	393
ACVR2A	2	3	5.809	0.00372	1.527	22.088	13			KBTBD5	3	19	0.207	0.00271	0.066	0.646	263
TDG	12	8	0.769	0.0038	0.643	0.919	4316			HACE1	6	4	2.688	0.00273	1.37	5.275	74
TH	11	16	2.657	0.00386	1.335	5.285	78			C1orf51	1	9	3.636	0.00277	1.474	8.967	35
THEG	19	29	1.165	0.0039	1.05	1.293	8820			DNASE2B	1	8	2	0.0028	1.258	3.18	202
KRTAP13-4	21	11	0.819	0.00402	0.715	0.938	8285			APOC3	11	3	3.816	0.00287	1.466	9.932	25
MRPL9	1	9	1.253	0.00406	1.074	1.463	10855			AQP3	9	2	19.909	0.00294	1.231	322.017	2
PDHA1	23	5	1.554	0.0043	1.145	2.109	553			ZNF549	19	16	1.816	0.00296	1.217	2.709	281
S5.4 Overall Prostate Cancer
			All functional variants										Rare functional variants
			rare or common										(MAF < 0.01 overall)
Gene	Chr	No. of SNPs	OR	P	95% LowerCL	95% UpperCL	MAC			Gene	Chr	No. of SNPs	OR	P	95% LowerCL	95% UpperCL	MAC
C6orf165	6	26	0.863	5.73e-06	0.809	0.92	4085			C17orf53	17	24	0.44	5.33e-05	0.292	0.662	148
MANSC1	12	9	0.862	6.11e-05	0.801	0.927	3934			WDR54	2	8	1.936	0.000112	1.377	2.723	138
GP6	19	21	0.962	6.42e-05	0.945	0.981	21293			TYW1B	7	5	1.548	0.000138	1.234	1.942	306
SERPING1	11	7	1.513	9.63e-05	1.227	1.865	392			FGFBP3	10	5	18.04	0.000151	2.304	141.225	11
SIX4	14	13	1.096	0.00012	1.046	1.148	10458			SERPING1	11	7	3.134	0.000188	1.668	5.887	42
ATP6V0D2	8	17	0.77	0.000157	0.673	0.882	1211			ABCB4	7	21	1.358	0.000282	1.15	1.603	589
SUGP1	19	9	1.209	0.000173	1.095	1.336	1891			MRGPRF	11	6	2.121	0.000302	1.397	3.219	92
DDX24	14	29	0.851	0.000316	0.78	0.929	2352			ALCAM	3	12	0.574	0.000337	0.422	0.78	231
GJB2	13	18	1.118	0.000342	1.052	1.189	4856			ANKRD30A	10	26	0.663	0.000451	0.526	0.836	374
CIC	19	14	0.44	0.000487	0.274	0.706	111			MFSD1	3	7	1.448	0.000469	1.175	1.783	393
CCDC124	19	7	0.709	0.000665	0.581	0.865	518			DDX24	14	29	0.78	0.000473	0.678	0.897	835
CCL1	17	3	1.575	0.00074	1.206	2.056	219			CIC	19	14	0.44	0.000487	0.274	0.706	111
OR2T6	1	14	0.947	0.00082	0.917	0.978	18236			LOC100287718	6	9	1.34	0.000513	1.135	1.582	612
FZD2	17	2	0.405	0.000845	0.234	0.7	87			PRR16	5	9	0.577	0.000528	0.421	0.79	212
DEFA4	8	9	0.867	0.000916	0.797	0.944	1863			MYO5C	15	47	1.267	0.000552	1.107	1.45	887
ZNF292	6	48	0.921	0.000973	0.877	0.967	16520			SEMA4B	15	22	1.374	0.000626	1.144	1.65	494
TMEM45A	3	7	0.635	0.000978	0.484	0.834	284			NLRP5	19	56	0.771	0.000657	0.663	0.897	686
FBXO33	14	10	1.393	0.0011	1.141	1.702	420			CCL1	17	3	1.575	0.00074	1.206	2.056	219
OR2T1	1	13	1.096	0.00112	1.037	1.158	9547			CUL4A	13	10	1.965	0.000771	1.317	2.934	100
C14orf102	14	40	1.089	0.00119	1.034	1.147	10267			FZD2	17	2	0.405	0.000845	0.234	0.7	87
PDE7B	6	6	1.393	0.00122	1.138	1.704	429			CDC6	17	10	0.695	0.000885	0.56	0.862	426
SH2D4A	8	19	1.063	0.00128	1.024	1.104	9120			PBXIP1	1	15	0.641	0.00121	0.488	0.841	274
CCKAR	4	12	1.329	0.00129	1.117	1.582	563			CCKAR	4	12	1.329	0.00129	1.117	1.582	563
LRRC30	18	10	0.619	0.00129	0.461	0.831	227			LRRC30	18	10	0.619	0.00129	0.461	0.831	227
IGFL2	19	5	0.831	0.00143	0.742	0.931	1440			ACSBG2	19	33	1.23	0.00132	1.084	1.397	849
PRAM1	19	21	1.04	0.00144	1.015	1.066	22111			DNAJC28	21	14	0.423	0.00145	0.244	0.731	81
CALHM3	10	4	1.104	0.00161	1.038	1.174	6154			FAM166A	9	20	1.238	0.00155	1.084	1.413	956
CBR3	21	8	1.08	0.00161	1.03	1.133	9962			OR2AE1	7	16	1.568	0.00156	1.184	2.077	207
TMEM55A	8	3	4.229	0.00176	1.59	11.246	19			RILPL2	12	2	>999.999	0.00157	<0.001	>999.999	6
TTLL12	22	22	0.926	0.00176	0.882	0.972	7195			ODF3B	22	5	3.854	0.00158	1.575	9.43	24
RHBDD3	22	8	1.425	0.00183	1.139	1.783	333			TMEM55A	8	3	4.229	0.00176	1.59	11.246	19
ICT1	17	7	0.85	0.00188	0.767	0.942	2110			AKAP8	19	21	1.312	0.00178	1.105	1.557	483
ADCK3	1	23	1.189	0.00196	1.065	1.327	1200			CLDN16	3	9	1.427	0.00178	1.141	1.785	328
GPR125	4	37	1.084	0.00197	1.03	1.142	7968			RHBDD3	22	8	1.425	0.00183	1.139	1.783	333
FAM92B	16	13	1.297	0.002	1.099	1.53	643			ABHD12	20	10	1.552	0.00202	1.172	2.056	207
DNAAF1	16	40	0.98	0.00201	0.967	0.993	41332			FAM105A	5	10	1.499	0.00202	1.157	1.942	242
FAM105A	5	10	1.499	0.00202	1.157	1.942	242			TXNDC8	9	9	1.429	0.00204	1.138	1.796	316
HTATSF1	23	8	0.831	0.00203	0.738	0.935	628			EPSTI1	13	16	1.395	0.00206	1.128	1.725	362
CCNI2	5	5	1.729	0.00226	1.212	2.468	127			CES1	16	8	0.519	0.00212	0.339	0.794	120
ZNF90	19	2	0.91	0.00227	0.856	0.967	8086			PSG7	19	6	1.595	0.00217	1.181	2.155	181
HSD11B1L	19	3	2.359	0.00246	1.332	4.176	50			CCNI2	5	5	1.729	0.00226	1.212	2.468	127
LIF	22	4	1.242	0.00246	1.079	1.43	592			KIF15	3	43	0.766	0.00227	0.645	0.91	650
C16orf48	16	8	1.306	0.00259	1.097	1.554	550			OR10V1	11	14	1.734	0.00235	1.211	2.483	123
LOC646851	22	5	0.856	0.00262	0.774	0.947	1995			CHST10	2	17	1.354	0.00236	1.113	1.647	444
CLP1	11	5	2.062	0.00283	1.271	3.346	69			ERP29	12	7	1.617	0.00241	1.182	2.211	163
ZNF574	19	19	0.791	0.00288	0.678	0.923	823			HSD11B1L	19	3	2.359	0.00246	1.332	4.176	50
TRIM28	19	7	0.452	0.00289	0.264	0.772	86			TECPR1	7	24	0.715	0.00253	0.574	0.89	408
RNASET2	6	9	0.865	0.00307	0.786	0.952	1931			FAM184A	6	12	1.415	0.00276	1.126	1.778	317
ITIH4	3	26	0.958	0.00312	0.932	0.986	19675			CLP1	11	5	2.062	0.00283	1.271	3.346	69
PTGFR	1	10	0.703	0.00317	0.555	0.889	355			CDK18	1	17	0.607	0.00289	0.435	0.846	182
EML4	2	17	1.089	0.0032	1.029	1.152	12365			RNF215	22	10	0.682	0.00289	0.529	0.879	307
MAD1L1	7	15	1.091	0.00321	1.03	1.156	7976			TRIM28	19	7	0.452	0.00289	0.264	0.772	86
RAB3GAP1	2	18	1.1	0.00323	1.032	1.172	6118			PTGFR	1	10	0.703	0.00317	0.555	0.889	355
HERC4	10	8	0.367	0.00337	0.183	0.737	53			SLC16A10	6	5	0.147	0.00326	0.034	0.638	21
DDR2	1	12	0.715	0.00348	0.57	0.896	376			HERC4	10	8	0.367	0.00337	0.183	0.737	53
WNK3	23	12	0.773	0.0035	0.649	0.921	272			ANKRD28	3	14	0.584	0.00345	0.405	0.841	156
SH3BP5	3	8	0.78	0.00351	0.659	0.922	649			DDR2	1	12	0.715	0.00348	0.57	0.896	376
NUDT12	5	12	1.519	0.00356	1.145	2.017	201			WNK3	23	12	0.773	0.0035	0.649	0.921	272
PMVK	1	8	0.841	0.0036	0.748	0.945	1671			KCNK5	6	16	0.567	0.00353	0.386	0.835	140
SLC25A31	4	7	0.757	0.0036	0.627	0.914	563			NUDT12	5	12	1.519	0.00356	1.145	2.017	201
DAZL	3	6	0.641	0.00361	0.473	0.867	220			IL29	19	9	3.648	0.0036	1.441	9.24	20
CDHR3	7	33	1.042	0.00363	1.014	1.072	15108			DAZL	3	6	0.641	0.00361	0.473	0.867	220
KANK3	19	12	1.083	0.00376	1.026	1.144	12519			NARS2	11	14	2.028	0.00369	1.247	3.299	67
ATP10B	5	54	1.074	0.00381	1.023	1.128	8041			AIPL1	17	18	1.372	0.00372	1.106	1.701	310
TMEM59	1	5	0.595	0.00388	0.417	0.85	155			IL21R	16	10	0.686	0.00383	0.53	0.887	296
MUM1	19	20	1.086	0.004	1.027	1.149	8027			TMEM59	1	5	0.595	0.00388	0.417	0.85	155
SCRIB	8	32	0.895	0.00404	0.83	0.965	3440			ARHGAP30	1	25	1.278	0.00397	1.081	1.511	566
PPAPDC2	9	4	0.521	0.00407	0.331	0.82	101			CRTAC1	10	27	1.456	0.00399	1.126	1.882	247
CHRNA9	4	17	1.054	0.00416	1.017	1.093	10284			FAM111B	11	12	1.601	0.00402	1.158	2.213	153
PDCD4	10	4	0.839	0.0042	0.744	0.946	1400			PPAPDC2	9	4	0.521	0.00407	0.331	0.82	101
BSDC1	1	6	0.695	0.00424	0.541	0.893	304			TRIM69	15	15	2.073	0.0041	1.247	3.445	61
SEPSECS	4	9	0.881	0.00429	0.808	0.961	2696			TRPV5	7	18	0.66	0.00429	0.495	0.88	242
ABHD10	3	9	1.225	0.00435	1.065	1.408	888			FMN1	15	48	1.199	0.00437	1.058	1.358	993
COQ7	16	10	0.921	0.00455	0.871	0.975	9995			PDE8A	15	12	1.506	0.00438	1.134	1.999	202
IK	5	4	1.718	0.00459	1.177	2.509	113			DUOX2	15	53	1.195	0.00441	1.057	1.352	911
LPPR4	1	5	0.631	0.00459	0.457	0.87	230			OSCAR	19	5	1.568	0.00445	1.147	2.143	167
IDH2	15	6	1.778	0.00463	1.186	2.664	94			FSCN3	7	28	1.323	0.00446	1.09	1.606	447
EHMT2	6	13	1.533	0.00465	1.138	2.066	183			IK	5	4	1.718	0.00459	1.177	2.509	113
TEP1	14	98	1.026	0.00467	1.008	1.045	64003			LPPR4	1	5	0.631	0.00459	0.457	0.87	230
RPAIN	17	9	1.044	0.00483	1.013	1.076	21268			IDH2	15	6	1.778	0.00463	1.186	2.664	94
SLC25A40	7	8	0.786	0.00483	0.665	0.93	723			EHMT2	6	13	1.533	0.00465	1.138	2.066	183
SLC39A1	1	4	4.642	0.00484	1.449	14.869	15			AUP1	2	7	1.638	0.00474	1.16	2.314	137
SH3RF1	4	9	0.875	0.00497	0.797	0.96	2227			CAPN2	1	23	0.665	0.00477	0.5	0.885	237
DLG4	17	4	0.384	0.00498	0.192	0.768	52			SLC39A1	1	4	4.642	0.00484	1.449	14.869	15
TM4SF1	3	2	11.459	0.0051	1.334	98.429	6			ZNF600	19	9	1.596	0.00489	1.149	2.217	144
TNKS1BP1	11	47	0.929	0.00511	0.881	0.978	5259			MYH15	3	47	0.833	0.00495	0.734	0.947	1083
GALC	14	23	1.057	0.00518	1.017	1.1	17079			SEPP1	5	10	1.299	0.00497	1.081	1.56	425
VASN	16	13	1.087	0.00523	1.025	1.153	6855			DLG4	17	4	0.384	0.00498	0.192	0.768	52
RPRD2	1	16	1.159	0.00526	1.045	1.286	1644			TM4SF1	3	2	11.459	0.0051	1.334	98.429	6
FGFR4	5	19	0.907	0.00529	0.847	0.971	18896			XPO5	6	15	0.719	0.0051	0.569	0.908	310
NRIP1	21	33	1.1	0.00532	1.029	1.176	4640			L3MBTL1	20	22	0.787	0.0052	0.665	0.932	472
HES3	1	3	0.716	0.00537	0.566	0.907	344			MED16	19	25	0.753	0.00523	0.616	0.919	480
LYG2	2	8	0.681	0.00538	0.518	0.894	273			TRAK2	2	17	0.617	0.00529	0.438	0.869	181
OR1I1	19	15	0.978	0.00538	0.963	0.993	41484			HES3	1	3	0.716	0.00537	0.566	0.907	344
OR2AK2	1	15	0.935	0.00538	0.891	0.98	21974			LYG2	2	8	0.681	0.00538	0.518	0.894	273
MAPKAPK5	12	4	1.474	0.00541	1.119	1.94	216			MAPKAPK5	12	4	1.474	0.00541	1.119	1.94	216
TYRO3	15	21	1.097	0.00548	1.028	1.171	3788			PDGFB	22	9	1.495	0.00549	1.123	1.989	196
PDGFB	22	9	1.495	0.00549	1.123	1.989	196			TATDN1	8	9	0.641	0.00551	0.466	0.88	204
TATDN1	8	9	0.641	0.00551	0.466	0.88	204			CD3EAP	19	16	1.419	0.00559	1.105	1.823	193
MCPH1	8	42	0.968	0.00571	0.945	0.991	24426			KCNE1L	23	3	0.399	0.0056	0.189	0.84	30
S5.5 Advanced Prostate Cancer
			All functional variants										Rare functional variants
			rare or common										(MAF < 0.01 overall)
Gene	Chr	No. of SNPs	OR	P	95% LowerCL	95% UpperCL	MAC			Gene	Chr	No. of SNPs	OR	P	95% LowerCL	95% UpperCL	MAC
SAMD1	19	3	26.026	1.22e-07	4.294	157.734	5			CPA3	3	19	2.26	6.97e-08	1.66	3.078	340
FOXF2	6	2	42.258	5.13e-07	4.111	434.371	4			SAMD1	19	3	26.026	1.22e-07	4.294	157.734	5
NOL4	18	2	17.531	2.13e-06	3.477	88.396	6			FOXF2	6	2	42.258	5.13e-07	4.111	434.371	4
IDI1	10	3	13.409	1.24e-05	2.956	60.824	7			NOL4	18	2	17.531	2.13e-06	3.477	88.396	6
CYP11B1	8	5	>999.999	2.07e-05	<0.001	>999.999	1			IDI1	10	3	13.409	1.24e-05	2.956	60.824	7
ZKSCAN1	7	9	2.83	2.25e-05	1.685	4.753	85			TGFB1	19	4	>999.999	1.33e-05	<0.001	>999.999	1
EGR3	8	3	11.863	2.45e-05	2.769	50.818	8			RPL28	19	6	7.388	1.4e-05	2.568	21.256	17
CLP1	11	5	4.377	3.28e-05	2.05	9.346	41			PPP1R15A	19	25	2.088	1.53e-05	1.484	2.938	380
HNRNPC	14	5	>999.999	3.29e-05	<0.001	>999.999	1			ARPC5L	9	2	>999.999	1.77e-05	<0.001	>999.999	1
NUDT5	10	3	6.62	3.89e-05	2.35	18.648	20			CYP11B1	8	5	>999.999	2.07e-05	<0.001	>999.999	1
C20orf160	20	3	4.244	4.22e-05	2.003	8.992	45			ZKSCAN1	7	9	2.83	2.25e-05	1.685	4.753	85
KDM5C	23	6	>999.999	6.21e-05	<0.001	>999.999	4			EGR3	8	3	11.863	2.45e-05	2.769	50.818	8
BCKDK	16	3	>999.999	8.15e-05	<0.001	>999.999	1			IL29	19	9	9.156	2.74e-05	2.626	31.919	11
TNFSF13B	13	3	2.731	0.000103	1.61	4.634	105			CLP1	11	5	4.377	3.28e-05	2.05	9.346	41
LIN54	4	6	3.894	0.000108	1.857	8.166	47			HNRNPC	14	5	>999.999	3.29e-05	<0.001	>999.999	1
TMPRSS11D	4	6	7.389	0.000115	2.246	24.306	13			NUDT5	10	3	6.62	3.89e-05	2.35	18.648	20
NDUFS7	19	3	0.776	0.000143	0.681	0.885	7618			C20orf160	20	3	4.244	4.22e-05	2.003	8.992	45
TBX21	17	4	7.191	0.000157	2.183	23.688	13			PLAC1L	11	2	>999.999	4.24e-05	<0.001	>999.999	1
OR2T1	1	13	1.275	0.000234	1.12	1.452	6364			MST1	3	2	>999.999	6.14e-05	<0.001	>999.999	1
SOX4	6	2	6.901	0.000244	2.089	22.795	13			KDM5C	23	6	>999.999	6.21e-05	<0.001	>999.999	4
C15orf17	15	3	3.293	0.000399	1.639	6.619	57			FAM122C	23	4	3.957	6.85e-05	1.604	9.764	10
SLC2A3	12	5	4.115	0.000427	1.756	9.64	34			BCKDK	16	3	>999.999	8.15e-05	<0.001	>999.999	1
GPR107	9	10	2.668	0.000428	1.51	4.712	102			AUP1	2	7	3.239	8.18e-05	1.748	6.004	86
SLC6A14	23	5	2.446	0.000448	1.393	4.298	28			COL1A1	17	18	2.109	8.77e-05	1.439	3.09	289
GOLGA1	9	21	0.504	0.000497	0.34	0.747	914			TNFSF13B	13	3	2.731	0.000103	1.61	4.634	105
TRIB2	2	4	2.502	0.000499	1.468	4.267	121			LIN54	4	6	3.894	0.000108	1.857	8.166	47
C7orf31	7	28	1.105	0.000509	1.044	1.168	20845			TMPRSS11D	4	6	7.389	0.000115	2.246	24.306	13
FIP1L1	4	2	3.307	0.00067	1.595	6.86	60			PCMT1	6	3	16.757	0.000133	2.342	119.925	4
YBEY	21	6	1.795	0.000683	1.275	2.528	402			TYW1B	7	5	2.259	0.000136	1.467	3.48	186
SMARCA5	4	3	11.488	0.00077	1.903	69.335	5			TBX21	17	4	7.191	0.000157	2.183	23.688	13
ESPL1	12	43	1.123	0.000772	1.049	1.202	10920			PLEK	2	11	2.915	0.000224	1.603	5.299	89
SLC29A2	11	13	2.941	0.000787	1.521	5.688	70			SOX4	6	2	6.901	0.000244	2.089	22.795	13
CD79B	17	3	25.579	0.000801	1.539	425.025	2			ANXA4	2	9	2.769	0.000281	1.557	4.924	99
SRM	1	2	2.723	0.000927	1.457	5.09	77			COX4I2	20	5	4.218	0.00031	1.805	9.859	35
MRPL55	1	6	1.545	0.000935	1.192	2.003	1128			WBSCR28	7	11	2.889	0.000323	1.578	5.289	86
SEMA3D	7	17	1.258	0.0011	1.096	1.445	4756			ARGFX	3	6	12.743	0.000371	2.099	77.379	5
ARMC1	8	3	7.115	0.00112	1.803	28.078	10			C15orf17	15	3	3.293	0.000399	1.639	6.619	57
CCL28	5	5	2.846	0.00136	1.461	5.545	82			C7orf65	7	5	6.189	0.000409	1.955	19.592	16
C19orf18	19	5	2.309	0.00139	1.361	3.918	125			SLC2A3	12	5	4.115	0.000427	1.756	9.64	34
CARD9	9	14	0.315	0.00152	0.149	0.67	335			GPR107	9	10	2.668	0.000428	1.51	4.712	102
MRPL1	4	7	1.58	0.00153	1.188	2.102	660			SLC6A14	23	5	2.446	0.000448	1.393	4.298	28
POLR1A	2	29	1.168	0.00154	1.061	1.286	8265			TRIB2	2	4	2.502	0.000499	1.468	4.267	121
MCOLN3	1	14	2.795	0.00159	1.433	5.454	70			SCN7A	2	50	1.562	0.000508	1.212	2.012	841
OR1A1	17	10	0.798	0.00159	0.693	0.918	7240			RXFP4	1	17	2.765	0.000641	1.505	5.08	84
CDX2	13	4	1.268	0.0016	1.094	1.47	4262			FIP1L1	4	2	3.307	0.00067	1.595	6.86	60
SNX15	11	14	0.531	0.00161	0.356	0.792	807			PHKA2	23	19	1.587	0.000679	1.205	2.088	154
C12orf40	12	17	1.277	0.00166	1.096	1.488	2708			SMARCA5	4	3	11.488	0.00077	1.903	69.335	5
NAA40	11	4	2.65	0.00174	1.408	4.989	93			SLC29A2	11	13	2.941	0.000787	1.521	5.688	70
CCDC30	1	13	0.636	0.00179	0.477	0.847	1314			CD79B	17	3	25.579	0.000801	1.539	425.025	2
LRRC19	9	17	1.459	0.0018	1.149	1.852	1010			NBPF7	1	8	2.399	0.000815	1.412	4.077	120
TRIM59	3	14	1.772	0.00182	1.23	2.553	351			CHST10	2	17	1.943	0.000858	1.305	2.895	289
PPP1R2	3	3	2.575	0.00183	1.387	4.779	93			SRM	1	2	2.723	0.000927	1.457	5.09	77
KMO	1	11	0.702	0.00189	0.561	0.879	1928			BMS1	10	19	1.681	0.000946	1.231	2.295	524
KATNAL1	13	5	3.875	0.00199	1.54	9.753	28			RAB36	22	13	1.621	0.00096	1.205	2.18	269
AK8	9	20	1.279	0.00203	1.093	1.496	2065			CANT1	17	11	1.938	0.00103	1.296	2.897	282
MZF1	19	18	0.852	0.00206	0.77	0.944	10322			DGAT2	11	7	3.196	0.00107	1.533	6.662	52
SHD	19	6	0.823	0.00209	0.727	0.932	8966			ARMC1	8	3	7.115	0.00112	1.803	28.078	10
FBXO33	14	10	1.93	0.00212	1.259	2.96	265			KIAA0753	17	32	1.622	0.00112	1.209	2.177	551
SLC39A13	11	7	0.72	0.00212	0.584	0.889	2158			TAF2	8	12	2.889	0.00112	1.483	5.627	65
IL17B	5	6	6.109	0.00213	1.637	22.804	12			ZNF443	19	6	2.377	0.00119	1.385	4.078	140
METTL14	4	4	4.945	0.00219	1.595	15.337	18			ZNF630	23	15	0.501	0.00122	0.319	0.787	350
PANK3	5	3	3.394	0.00222	1.479	7.79	44			CCDC19	1	22	1.501	0.00124	1.167	1.931	457
BCL3	19	5	2.259	0.00224	1.32	3.868	143			CCNB1IP1	14	8	3.337	0.00126	1.536	7.248	51
GTF2A1	14	2	11.982	0.00224	1.614	88.964	4			PLCG1	20	14	3.658	0.00126	1.576	8.494	37
MAP1LC3C	1	3	2.489	0.00235	1.356	4.567	86			CCL28	5	5	2.846	0.00136	1.461	5.545	82
CPA3	3	19	1.351	0.00265	1.109	1.644	1840			CLMP	11	7	3.181	0.00137	1.492	6.783	43
RNF185	22	3	2.483	0.0028	1.332	4.628	83			C19orf18	19	5	2.309	0.00139	1.361	3.918	125
TMEM189	20	6	5.817	0.00283	1.572	21.518	13			FAM176A	2	3	6.855	0.00141	1.745	26.926	10
CDH6	5	7	1.982	0.00285	1.254	3.132	202			CARD9	9	14	0.315	0.00152	0.149	0.67	335
PRDX6	1	2	8.648	0.00291	1.57	47.638	6			CNGB3	8	33	0.476	0.00157	0.297	0.762	598
LMF2	22	32	1.274	0.00293	1.086	1.494	2576			MCOLN3	1	14	2.795	0.00159	1.433	5.454	70
PRSS38	1	20	1.197	0.00293	1.063	1.348	8259			NAA40	11	4	2.65	0.00174	1.408	4.989	93
AICDA	12	2	3.285	0.00298	1.435	7.521	48			CASP10	2	11	3.563	0.00177	1.525	8.321	36
PRKAG3	2	16	1.41	0.00301	1.122	1.77	1191			TRIM59	3	14	1.772	0.00182	1.23	2.553	351
KIAA0664	17	13	0.777	0.00302	0.658	0.919	3456			PPP1R2	3	3	2.575	0.00183	1.387	4.779	93
MCPH1	8	42	0.916	0.00309	0.864	0.971	16764			MC2R	18	9	3.215	0.00187	1.478	6.989	48
IKZF1	7	2	2.752	0.00318	1.344	5.632	54			KIAA1199	15	28	1.815	0.00189	1.239	2.66	282
PDCL	9	5	2.629	0.00319	1.35	5.119	68			KATNAL1	13	5	3.875	0.00199	1.54	9.753	28
METTL23	17	4	2.287	0.00321	1.3	4.023	105			NOL8	9	33	1.564	0.00203	1.172	2.087	468
ARHGEF37	5	29	0.874	0.00328	0.799	0.956	26395			IL17B	5	6	6.109	0.00213	1.637	22.804	12
SH2D4A	8	19	1.136	0.00331	1.043	1.237	6108			METTL14	4	4	4.945	0.00219	1.595	15.337	18
A4GALT	22	7	1.228	0.00333	1.07	1.408	5377			PANK3	5	3	3.394	0.00222	1.479	7.79	44
AKT2	19	6	3.527	0.00336	1.437	8.654	34			BCL3	19	5	2.259	0.00224	1.32	3.868	143
CDH8	16	13	2.799	0.00349	1.363	5.748	63			GTF2A1	14	2	11.982	0.00224	1.614	88.964	4
IDH2	15	6	2.859	0.0035	1.36	6.01	55			C1orf74	1	4	>999.999	0.00228	<0.001	>999.999	1
LTB4R	14	4	1.77	0.0035	1.2	2.61	303			MAP1LC3C	1	3	2.489	0.00235	1.356	4.567	86
PID1	2	4	5.47	0.00356	1.22	24.517	7			USP21	1	7	2.911	0.00236	1.397	6.066	50
DAZAP2	12	4	1.483	0.00364	1.135	1.938	897			TTLL2	6	27	1.541	0.0024	1.161	2.045	536
PLA1A	3	15	1.384	0.00366	1.111	1.725	1711			TSPAN32	11	14	0.33	0.00244	0.155	0.701	318
C6orf165	6	26	0.784	0.00369	0.664	0.924	2890			NAA16	13	14	2.819	0.00245	1.394	5.702	59
MPL	1	23	0.649	0.0037	0.484	0.871	1282			MLX	17	3	20.822	0.00263	1.26	344.03	2
CASC5	15	52	0.899	0.00374	0.836	0.966	28265			SLC39A14	8	5	3.666	0.00264	1.482	9.067	34
TMEM71	8	10	1.714	0.00379	1.185	2.479	362			ASCC1	10	12	2.037	0.0027	1.267	3.275	178
ZNF713	7	6	4.52	0.00386	1.474	13.858	19			RNF185	22	3	2.483	0.0028	1.332	4.628	83
C1orf31	1	3	2.385	0.00394	1.298	4.384	117			TMEM189	20	6	5.817	0.00283	1.572	21.518	13
CCKBR	11	8	0.588	0.004	0.407	0.848	863			CDH6	5	7	1.982	0.00285	1.254	3.132	202
EVPLL	17	2	0.82	0.00402	0.716	0.939	7704			PRDX6	1	2	8.648	0.00291	1.57	47.638	6
HSD11B1L	19	3	3.876	0.00403	1.435	10.47	26			AICDA	12	2	3.285	0.00298	1.435	7.521	48
ZDHHC3	3	5	0.345	0.00404	0.162	0.738	289			PCDHA9	5	9	1.969	0.00298	1.242	3.121	144
TM4SF1	3	2	19.18	0.00405	1.157	317.821	2			AGPHD1	15	11	0.093	0.00308	0.013	0.665	158
S5.6 Non-advanced Prostate Cancer
			All functional variants										Rare functional variants
			rare or common										(MAF < 0.01 overall)
Gene	Chr	No. of SNPs	OR	P	95% LowerCL	95% UpperCL	MAC			Gene	Chr	No. of SNPs	OR	P	95% LowerCL	95% UpperCL	MAC
ATP6V0D2	8	17	0.745	7.49e-05	0.644	0.862	1141			C17orf53	17	24	0.397	4.33e-05	0.251	0.628	141
C6orf165	6	26	0.874	9.13e-05	0.817	0.935	3884			SEMA4B	15	22	1.438	0.000172	1.188	1.739	466
MANSC1	12	9	0.859	0.000108	0.795	0.928	3723			FGFBP3	10	5	18.058	0.000181	2.247	145.111	9
GP6	19	21	0.962	0.000113	0.943	0.981	20088			SERPING1	11	7	3.169	0.000266	1.65	6.084	38
GPR125	4	37	1.111	0.000143	1.052	1.173	7525			WDR54	2	8	1.883	0.000454	1.315	2.696	125
SIX4	14	13	1.094	0.000372	1.041	1.149	9822			MRGPRF	11	6	2.133	0.000481	1.38	3.296	84
SHPRH	6	28	0.829	0.000483	0.747	0.921	2054			RILPL2	12	2	>999.999	0.000563	<0.001	>999.999	6
DEFA4	8	9	0.853	0.000544	0.779	0.934	1756			MFSD1	3	7	1.466	0.000597	1.177	1.825	367
SUGP1	19	9	1.201	0.000616	1.081	1.333	1759			DDX24	14	29	0.771	0.000629	0.663	0.895	792
PRAM1	19	21	1.046	0.000619	1.019	1.073	20792			LOC100287718	6	9	1.348	0.000786	1.132	1.606	569
GJB2	13	18	1.12	0.000627	1.049	1.195	4561			CES1	16	8	0.45	0.000852	0.278	0.728	112
CBR3	21	8	1.092	0.000652	1.038	1.148	9380			MYO5C	15	47	1.275	0.000853	1.105	1.471	831
DDX24	14	29	0.85	0.000655	0.775	0.934	2231			MAPKAPK5	12	4	1.599	0.00102	1.205	2.121	208
SERPING1	11	7	1.461	0.000765	1.17	1.824	362			ABCB4	7	21	1.339	0.00103	1.124	1.594	543
C14orf102	14	40	1.098	0.000766	1.04	1.16	9665			CRTAC1	10	27	1.548	0.00115	1.187	2.019	235
LIF	22	4	1.281	0.000821	1.107	1.482	561			PRR16	5	9	0.576	0.00115	0.411	0.806	203
MAPKAPK5	12	4	1.599	0.00102	1.205	2.121	208			TYW1B	7	5	1.491	0.00117	1.169	1.9	277
DLK2	6	7	0.742	0.00106	0.62	0.888	638			CCL1	17	3	1.582	0.00122	1.195	2.096	203
CCL1	17	3	1.582	0.00122	1.195	2.096	203			ACSBG2	19	33	1.244	0.00126	1.089	1.421	796
RPAIN	17	9	1.054	0.00129	1.021	1.088	20049			ANKRD30A	10	26	0.668	0.00126	0.522	0.855	358
RAB3GAP1	2	18	1.116	0.00132	1.044	1.194	5757			SLC22A18AS	11	6	1.807	0.00138	1.252	2.609	121
VKORC1	16	3	2.748	0.00139	1.442	5.237	38			VKORC1	16	3	2.748	0.00139	1.442	5.237	38
CIC	19	14	0.45	0.0014	0.272	0.743	108			CIC	19	14	0.45	0.0014	0.272	0.743	108
LYG2	2	8	0.613	0.00142	0.453	0.83	254			LYG2	2	8	0.613	0.00142	0.453	0.83	254
OR2T6	1	14	0.946	0.00144	0.914	0.979	17184			FZD2	17	2	0.393	0.00151	0.216	0.714	84
CCDC14	3	21	0.903	0.0015	0.848	0.962	7737			FAM184A	6	12	1.462	0.00164	1.153	1.854	296
FZD2	17	2	0.393	0.00151	0.216	0.714	84			ACTR5	20	8	1.343	0.00167	1.117	1.615	489
IGFL2	19	5	0.823	0.00159	0.729	0.929	1360			EHMT2	6	13	1.625	0.00176	1.195	2.21	175
MMP1	11	26	0.709	0.00168	0.571	0.879	496			CUL4A	13	10	1.915	0.00202	1.26	2.913	91
EHMT2	6	13	1.625	0.00176	1.195	2.21	175			HES3	1	3	0.671	0.00218	0.519	0.867	321
PDE7B	6	6	1.402	0.00179	1.133	1.735	399			WNT9A	1	4	2.179	0.0022	1.281	3.706	44
ZNF574	19	19	0.77	0.00198	0.652	0.909	777			PAPOLG	2	8	0.377	0.00232	0.197	0.723	71
FAM92B	16	13	1.312	0.00209	1.103	1.561	602			ODF3B	22	5	3.819	0.00241	1.516	9.622	21
HES3	1	3	0.671	0.00218	0.519	0.867	321			C5orf46	5	4	13.193	0.00246	1.529	113.845	6
WNT9A	1	4	2.179	0.0022	1.281	3.706	44			TMEM55A	8	3	4.208	0.00246	1.538	11.51	17
CALHM3	10	4	1.106	0.00225	1.037	1.181	5780			ERP29	12	7	1.646	0.00252	1.187	2.281	152
PAPOLG	2	8	0.377	0.00232	0.197	0.723	71			RHBDD3	22	8	1.435	0.00255	1.134	1.817	310
ZSCAN18	19	11	1.121	0.00235	1.041	1.206	3947			CDK18	1	17	0.578	0.00258	0.403	0.829	172
CPD	17	18	0.773	0.00246	0.653	0.913	785			ACSM2A	16	4	7.826	0.00265	1.631	37.549	10
TMEM55A	8	3	4.208	0.00246	1.538	11.51	17			PRKAB2	1	2	2.322	0.00277	1.318	4.091	50
RHBDD3	22	8	1.435	0.00255	1.134	1.817	310			DEPDC5	22	36	0.771	0.00278	0.651	0.915	686
ZNF292	6	48	0.924	0.00266	0.877	0.973	15580			NUDT12	5	12	1.562	0.00288	1.162	2.1	187
PRKAB2	1	2	2.322	0.00277	1.318	4.091	50			AKAP8	19	21	1.313	0.00293	1.096	1.572	449
C16orf48	16	8	1.322	0.00279	1.1	1.588	506			RNF8	6	2	>999.999	0.00295	<0.001	>999.999	4
NUDT12	5	12	1.562	0.00288	1.162	2.1	187			SLC2A5	1	19	0.765	0.00297	0.641	0.913	645
RNF8	6	2	>999.999	0.00295	<0.001	>999.999	4			UCN3	10	9	1.982	0.00306	1.25	3.141	76
SLC2A5	1	19	0.765	0.00297	0.641	0.913	645			CCKAR	4	12	1.318	0.00311	1.097	1.584	524
IL17REL	22	9	1.087	0.00308	1.029	1.149	7299			CDS2	20	3	7.944	0.00312	1.578	39.981	8
CCKAR	4	12	1.318	0.00311	1.097	1.584	524			FAM105A	5	10	1.502	0.00317	1.144	1.972	225
CDS2	20	3	7.944	0.00312	1.578	39.981	8			CCNI2	5	5	1.738	0.00326	1.197	2.524	117
POLA2	11	15	0.888	0.00313	0.821	0.961	3506			POGLUT1	3	9	0.56	0.00335	0.378	0.829	157
FAM105A	5	10	1.502	0.00317	1.144	1.972	225			FAM166A	9	20	1.232	0.00342	1.071	1.418	891
CCNI2	5	5	1.738	0.00326	1.197	2.524	117			EXTL3	8	11	0.432	0.00352	0.242	0.772	79
CCDC124	19	7	0.731	0.00333	0.592	0.902	498			CAST	5	31	1.259	0.00363	1.077	1.472	613
ICT1	17	7	0.849	0.00333	0.761	0.947	1993			LRRC30	18	10	0.632	0.0037	0.463	0.864	218
POGLUT1	3	9	0.56	0.00335	0.378	0.829	157			OSCAR	19	5	1.622	0.00373	1.166	2.254	155
PMVK	1	8	0.83	0.00339	0.732	0.94	1575			RCC1	1	5	0.516	0.00376	0.328	0.814	124
RTP1	3	8	0.919	0.00342	0.869	0.973	9672			ARHGAP30	1	25	1.294	0.00385	1.086	1.543	529
DNAAF1	16	40	0.98	0.00351	0.967	0.993	38904			NLRP5	19	56	0.793	0.00388	0.677	0.929	659
FN1	2	56	1.151	0.00352	1.047	1.266	2103			IL21R	16	10	0.667	0.00397	0.506	0.88	280
RNASET2	6	9	0.859	0.00355	0.776	0.952	1821			OR2AE1	7	16	1.537	0.00441	1.141	2.071	189
PDCD4	10	4	0.827	0.00357	0.727	0.94	1321			IK	5	4	1.758	0.00455	1.185	2.608	105
LRRC30	18	10	0.632	0.0037	0.463	0.864	218			TRIM28	19	7	0.443	0.00467	0.248	0.79	83
RCC1	1	5	0.516	0.00376	0.328	0.814	124			DNAJC28	21	14	0.446	0.00474	0.25	0.794	79
ATP6V0E2	7	6	0.728	0.0039	0.586	0.904	464			OR10V1	11	14	1.716	0.00474	1.175	2.506	112
FBXO33	14	10	1.365	0.0039	1.104	1.688	387			CLDN16	3	9	1.405	0.00475	1.109	1.781	300
ABHD10	3	9	1.24	0.00395	1.071	1.435	827			HSD11B1L	19	3	2.316	0.00501	1.268	4.229	44
CCDC77	12	18	1.065	0.00398	1.02	1.112	12528			ZNF883	9	7	2.125	0.00502	1.234	3.656	51
CHRNA9	4	17	1.058	0.00399	1.018	1.099	9652			SEC22C	3	6	1.526	0.00516	1.132	2.056	182
TTBK2	15	21	0.927	0.00402	0.881	0.976	12578			SLC10A4	4	3	11.501	0.00523	1.332	99.33	6
GPRIN3	4	41	1.059	0.0041	1.018	1.101	15599			C14orf37	14	21	0.735	0.00532	0.591	0.913	431
PRKCG	19	5	1.244	0.00412	1.071	1.444	875			PBXIP1	1	15	0.667	0.00533	0.501	0.888	264
TCF3	19	20	1.123	0.00418	1.037	1.217	3368			HTR3B	11	23	0.747	0.00536	0.608	0.918	439
FBXO15	18	9	0.79	0.0043	0.671	0.929	771			SH3D19	4	16	1.448	0.00538	1.114	1.882	236
ITIH4	3	26	0.957	0.00434	0.929	0.986	18509			FAM185A	7	2	4.732	0.00542	1.417	15.8	12
ADCK3	1	23	1.183	0.00443	1.053	1.329	1120			TMEM59	1	5	0.585	0.00543	0.399	0.857	147
GIGYF1	7	18	1.115	0.00443	1.035	1.202	5523			CCDC99	5	33	1.249	0.00557	1.067	1.462	636
GDF15	19	5	0.917	0.00445	0.863	0.973	6519			RNF141	11	2	0.491	0.00558	0.294	0.82	103
IK	5	4	1.758	0.00455	1.185	2.608	105			CASD1	7	15	1.753	0.0056	1.173	2.619	100
SEPSECS	4	9	0.875	0.00461	0.798	0.96	2546			C10orf116	10	3	5.577	0.00564	1.426	21.817	10
TRIM28	19	7	0.443	0.00467	0.248	0.79	83			ASTE1	3	19	1.378	0.00569	1.097	1.731	324
ATP13A3	3	17	1.166	0.00482	1.048	1.298	1676			CSRP3	11	4	0.284	0.00573	0.11	0.734	40
TYRO3	15	21	1.104	0.00484	1.031	1.183	3551			AZI1	17	45	1.219	0.00574	1.059	1.404	812
ALG2	9	6	1.105	0.00487	1.031	1.185	1895			SMARCA1	23	4	0.693	0.00578	0.532	0.904	134
LOC646851	22	5	0.857	0.0049	0.77	0.954	1896			LIF	22	4	1.505	0.00583	1.123	2.017	192
HSD11B1L	19	3	2.316	0.00501	1.268	4.229	44			BBS1	11	15	1.611	0.00593	1.143	2.27	139
ARHGEF17	11	41	1.109	0.00503	1.032	1.192	3929			SEPP1	5	10	1.31	0.00598	1.08	1.59	394
COQ7	16	10	0.918	0.00508	0.865	0.975	9405			KCNK6	19	7	1.696	0.00623	1.157	2.485	112
WDPCP	2	18	0.803	0.0051	0.688	0.936	853			DUSP1	5	4	3.595	0.00633	1.352	9.562	17
SEC22C	3	6	1.526	0.00516	1.132	2.056	182			DAZL	3	6	0.64	0.00634	0.463	0.884	210
SLC10A4	4	3	11.501	0.00523	1.332	99.33	6			TBC1D13	9	4	11.041	0.00634	1.28	95.242	6
TMEM45A	3	7	0.666	0.00523	0.5	0.887	275			FAM178B	2	8	0.541	0.00644	0.345	0.847	116
OR56A5	11	5	0.841	0.00534	0.744	0.95	1363			TRHR	8	4	0.321	0.00647	0.136	0.759	48
VPS8	3	26	1.045	0.00535	1.013	1.078	22091			PPM1N	19	6	1.449	0.00655	1.107	1.897	208
MUM1	19	20	1.088	0.0054	1.025	1.155	7547			LILRA1	19	10	0.679	0.00659	0.513	0.899	283
SEC24C	10	22	0.777	0.00543	0.65	0.929	582			GPR125	4	37	1.244	0.00664	1.062	1.458	616
TMEM59	1	5	0.585	0.00543	0.399	0.857	147			SH2D2A	1	7	1.506	0.00679	1.117	2.03	186
ATP10B	5	54	1.075	0.00548	1.022	1.132	7530			TECPR1	7	24	0.726	0.0068	0.576	0.916	390
DMP1	4	20	0.919	0.00548	0.866	0.976	8181			WNK3	23	12	0.778	0.00683	0.647	0.935	256
RNF141	11	2	0.491	0.00558	0.294	0.82	103			NFKBIZ	3	15	1.549	0.00684	1.125	2.133	160
No. of SNPs: number of ploymorphic SNPs
MAC: minor allele count
