# Supplementary material for: Genome-Wide Testing of Putative Functional Exonic Variants in Relationship with Breast and Prostate Cancer Risk in a Multiethnic Population
Source: PLoS Genet. 2013 Mar 28;9(3):e1003419. doi: 10.1371/journal.pgen.1003419 (PMC3610631; doi:10.1371/journal.pgen.1003419)
Supplement: Table S6 — Relationship between SNPs or genes known to be associated with breast cancer and coding SNPs on the exome array. Summary of nearest coding snps and gene burden analyses for (S6.1) GWAS associations and (S6.2) High risk genes. (XLSX) [file pgen.1003419.s008.xlsx]

## Sheet: Sheet1
Supplemental Table S6. Relationship between SNPs or Genes Known to be Associated with Breast Cancer and Coding SNPs on the Exome Array. Summary of Nearest coding SNPs and Gene Burden Analyses for (S6.1) GWAS associations and (S6.2) High Risk Genes
S6.1 Known GWAS Associations
																															Gene Sum Analysis
													Single Marker Analysis																		Overall				ER+				ER-
			+/-500kb		+/-100kb								Overall			African American			Native Hawaiian			Japanese American			Latino			European American			All Variants		Rare Variants		All Variants		Rare Variants		All Variants		Rare Variants
Hit	Chr	Location	No.of SNPs	No. of Genes	No.of SNPs	No. of Genes	SNP ID	rs ID	Distance(Kb)	R2	Gene	Type	OR	P	MAF	OR	P	MAF	OR	P	MAF	OR	P	MAF	OR	P	MAF	OR	P	MAF	OR	P	OR	P	OR	P	OR	P	OR	P	OR	P
rs616488	1	10566215	125	10	18	5	exm13714	rs183516103	159.198	NA	CASZ1	NS	1.425	0.022	0.00981823	1.502	0.013	0.03148	2.009	0.63	0.001241	NA	NA	0	0.591	0.41	0.00384	1.802	0.58	0.0005956	1.054	0.51	1.073	0.46	1.128	0.214	1.138	0.265	1.002	0.992	1.015	0.944
							exm13355	NA	-33.773	NA	DFFA	NS	>>	0.034	0	>>	0.089	0	NA	NA	0	NA	NA	0	NA	NA	0	>>	0.15	0	1.019	0.854	1.01	0.931	1.145	0.274	1.15	0.343	0.945	0.78	1.018	0.943
							exm13758	rs1281018	441.887	0.002	C1orf127	NS	1.139	0.054	0.0672631	1.12	0.18	0.1836	1.301	0.51	0.02109	0.913	0.94	0.000497	1.222	0.28	0.03149	1.231	0.18	0.03746	1.017	0.226	0.894	0.424	1.019	0.279	0.825	0.299	1.037	0.209	1.027	0.926
							exm13234	NA	-87.318	NA	PGD	NS	4.501	0.058	0.000132538	NA	NA	0	NA	NA	0	NA	NA	0	2.529	0.34	0.000768	>>	0.042	0	4.3	0.0318	4.3	0.0318	3.112	0.197	3.112	0.197	6.46	0.0658	6.46	0.0658
							exm12822	rs148471735	-386.605	NA	UBE4B	NS	6.809	0.073	6.62691e-05	7.346	0.06	0.000233	NA	NA	0	NA	NA	0	NA	NA	0	NA	NA	0	0.993	0.901	1.157	0.313	1.036	0.621	1.347	0.0789	0.781	0.0631	0.883	0.712
							exm12751	rs145618174	-497.954	NA	RBP7	NS	0.207	0.096	0.00072896	NA	NA	0	NA	NA	0	NA	NA	0	<<	0.13	0.00192	0.373	0.34	0.001784	0.306	0.043	0.306	0.043	0.345	0.134	0.345	0.134	<<	0.228	<<	0.228
							exm13013	rs142737643	-201.637	NA	KIF1B	NS	2.465	0.12	0.000463883	2.349	0.18	0.001398	NA	NA	0	NA	NA	0	2.299	0.55	0.000384	NA	NA	0	0.958	0.404	0.914	0.367	0.934	0.292	0.932	0.569	0.936	0.584	1.058	0.785
							exm13356	NA	-31.174	NA	PEX14	NS	<<	0.15	0.000265076	NA	NA	0	<<	0.48	0.001241	NA	NA	0	NA	NA	0	<<	0.23	0.0008918	0.989	0.887	1.034	0.803	0.997	0.978	1.131	0.461	0.879	0.454	0.919	0.767
							exm13304	rs145148065	-54.619	NA	APITD1-CORT	NS	<<	0.25	0.000198807	<<	0.56	0.000233	NA	NA	0	NA	NA	0	NA	NA	0	<<	0.32	0.0005945	<<	0.246	<<	0.246	<<	0.377	<<	0.377	<<	0.612	<<	0.612
							exm13283	rs146240548	-63.761	0.006	APITD1	NS	1.091	0.87	0.000795229	0.771	0.81	0.001165	NA	NA	0	NA	NA	0	1.367	0.63	0.002304	<<	0.41	0.0002973	1.091	0.872	1.091	0.872	0.805	0.779	0.805	0.779	1.27	0.82	1.27	0.82
rs11552449	1	114448389	104	11	67	7	exm85453	rs138092829	-67.503	NA	PTPN22	NS	6.143	0.0016	0.000265076	6.195	0.0015	0.000932	NA	NA	0	NA	NA	0	NA	NA	0	NA	NA	0	1.227	0.00244	1.085	0.605	1.292	0.00162	1.341	0.107	0.855	0.351	0.952	0.894
							exm85151	NA	-251.814	NA	MAGI3	NS	>>	0.0035	0	>>	0.0033	0	NA	NA	0	NA	NA	0	NA	NA	0	NA	NA	0	1.024	0.793	1.106	0.507	1.096	0.396	1.153	0.438	1.058	0.77	0.918	0.805
							exm85314	rs77659803	-147.103	NA	PHTF1	NS	0.499	0.0046	0.00854871	0.541	0.013	0.02889	NA	NA	0	NA	NA	0	<<	0.35	0.000768	<<	0.2	0.0008918	0.773	0.0492	0.773	0.0492	0.729	0.0652	0.729	0.0652	0.934	0.785	0.934	0.785
							exm86006	rs115112952	499.949	NA	TRIM33	NS	3.032	0.038	0.000463883	3.111	0.033	0.001631	NA	NA	0	NA	NA	0	NA	NA	0	NA	NA	0	1.008	0.853	1.714	0.0481	1.009	0.867	2.11	0.0178	0.999	0.99	0.736	0.668
							exm85679	NA	5.829	NA	DCLRE1B	NS	>>	0.044	0	NA	NA	0	NA	NA	0	NA	NA	0	NA	NA	0	>>	0.05	0	1.039	0.293	1.002	0.994	0.996	0.924	0.665	0.35	1.138	0.114	1.572	0.392
							exm85617	rs147043117	-3.932	NA	AP4B1	NS	4.09	0.052	0.000198807	6.855	0.012	0.000466	NA	NA	0	NA	NA	0	<<	0.46	0.000384	NA	NA	0	1.015	0.426	0.978	0.87	1.009	0.709	0.985	0.931	1.001	0.99	0.999	0.998
							exm85854	rs139529930	75.364	0.001	OLFML3	NS	4.559	0.06	0.000132538	<<	0.59	0.000233	<<	0.48	0.001241	NA	NA	0	>>	0.16	0	>>	0.021	0	1.537	0.0232	1.537	0.0232	1.448	0.127	1.448	0.127	1.938	0.0575	1.938	0.0575
							exm85826	rs140198710	67.689	NA	HIPK1	NS	>>	0.067	0	NA	NA	0	NA	NA	0	NA	NA	0	>>	0.058	0	NA	NA	0	1.123	0.513	1.123	0.513	1.178	0.451	1.178	0.451	1.726	0.113	1.726	0.113
							exm1701905	NA	-93.956	NA	RSBN1	NS	0.311	0.25	0.000463883	>>	0.068	0	NA	NA	0	NA	NA	0	<<	0.079	0.002304	<<	0.57	0.0002973	0.452	0.0956	0.452	0.0956	0.49	0.233	0.49	0.233	<<	0.168	<<	0.168
							exm2230842	NA	231.97	NA	SYT6	NS	<<	0.4	0.000132538	NA	NA	0	NA	NA	0	NA	NA	0	<<	0.48	0.000384	<<	0.6	0.0002973	1.024	0.585	0.89	0.689	1.034	0.536	0.791	0.546	0.842	0.0935	0.752	0.695
							exm2276895	NA	-19.228	NA	BCL2L15	ST	<<	0.51	6.62954e-05	NA	NA	0	NA	NA	0	NA	NA	0	NA	NA	0	<<	0.54	0.0002976	0.813	0.432	0.813	0.432	0.604	0.178	0.604	0.178	1.404	0.516	1.404	0.516
rs11249433	1	121280613	0	0	0	0	NA	NA	NA	NA	NA	NA	NA	NA	NA	NA	NA	NA	NA	NA	NA	NA	NA	NA	NA	NA	NA	NA	NA	NA	NA	NA	NA	NA	NA	NA	NA	NA	NA	NA	NA	NA
rs6678914	1	202187176	125	13	34	3	exm138299	rs140221360	-64.311	NA	PTPN7	NS	>>	0.0029	0	>>	0.0057	0	NA	NA	0	NA	NA	0	>>	0.35	0	NA	NA	0	1.038	0.372	1.348	0.0083	0.988	0.813	1.299	0.0624	1.08	0.402	1.394	0.149
							exm137989	rs145993045	-248.507	NA	TIMM17A	NS	8.382	0.034	6.62691e-05	>>	0.074	0	2.098	0.6	0.001241	NA	NA	0	NA	NA	0	>>	0.088	0	1.04	0.513	1.885	0.294	1.029	0.701	1.314	0.741	1.138	0.326	3.95	0.0793
							exm138478	rs6668765	92.288	0	LGR6	NS	0.828	0.036	0.0499669	0.809	0.027	0.1671	>>	0.025	0	NA	NA	0	1.075	0.83	0.01037	0.611	0.47	0.002973	0.922	0.061	0.971	0.723	0.915	0.104	0.948	0.607	0.937	0.493	0.923	0.662
							exm137923	NA	-317.715	NA	LMOD1	NS	0.247	0.042	0.00132538	>>	0.096	0	NA	NA	0	0.143	0.029	0.004225	<<	0.26	0.001152	NA	NA	0	1.04	0.287	1.006	0.975	1.038	0.423	0.863	0.565	1.035	0.669	1.41	0.327
							exm137754	rs147243092	-400.846	NA	NAV1	NS	4.788	0.049	0.000132538	3.206	0.38	0.000233	>>	0.18	0	NA	NA	0	NA	NA	0	4.169	0.21	0.0002973	1.032	0.372	0.882	0.272	1.026	0.556	0.796	0.137	1.079	0.324	1.349	0.138
							exm138651	rs145355178	216.632	NA	PPP1R12B	NS	>>	0.1	0	>>	0.077	0	NA	NA	0	NA	NA	0	NA	NA	0	NA	NA	0	0.85	0.318	0.85	0.318	0.893	0.574	0.893	0.574	0.786	0.496	0.786	0.496
							exm138176	NA	-94.883	NA	GPR37L1	NS	>>	0.12	0	>>	0.12	0	NA	NA	0	NA	NA	0	NA	NA	0	NA	NA	0	1.024	0.555	1.156	0.612	1.007	0.894	1.312	0.405	0.983	0.85	0.819	0.785
							exm138031	rs191005646	-220.634	0.001	RNPEP	NS	<<	0.16	0.000331345	<<	0.64	0.000233	NA	NA	0	NA	NA	0	NA	NA	0	<<	0.17	0.001189	0.978	0.459	0.983	0.923	0.97	0.434	0.864	0.512	0.942	0.384	1.286	0.449
							exm137881	rs2250377	-326.55	0.028338	SHISA4	NS	1.045	0.25	0.20835	1.085	0.3	0.2202	1.294	0.11	0.1712	1.032	0.75	0.09617	0.983	0.83	0.2542	1.012	0.87	0.3008	1.04	0.298	0.763	0.477	1.044	0.362	0.46	0.189	1.036	0.673	1.093	0.904
							exm138601	NA	117.601	NA	UBE2T	NS	<<	0.27	0.000198807	<<	0.67	0.000233	<<	0.46	0.001241	NA	NA	0	NA	NA	0	<<	0.49	0.0002973	0.83	0.783	0.83	0.783	0.988	0.988	0.988	0.988	<<	0.445	<<	0.445
							exm138151	NA	-204.121	NA	ELF3	NS	<<	0.34	0.000132538	NA	NA	0	NA	NA	0	NA	NA	0	<<	0.53	0.000384	<<	0.49	0.0002973	1.015	0.794	1	0.999	1.014	0.851	0.997	0.982	0.963	0.756	0.834	0.473
							exm137851	rs140642471	-343.207	NA	IPO9	NS	0.769	0.61	0.000994036	NA	NA	0	<<	0.46	0.001241	1.281	0.7	0.00174	<<	0.1	0.00192	1.405	0.78	0.0005945	0.882	0.712	0.882	0.712	1.039	0.924	1.039	0.924	<<	0.189	<<	0.189
							exm138802	rs147177966	386.553	NA	SYT2	NS	1.092	0.94	0.000132538	<<	0.57	0.000233	NA	NA	0	NA	NA	0	<<	0.54	0.000384	>>	0.22	0	1.092	0.943	1.092	0.943	<<	0.524	<<	0.524	<<	0.671	<<	0.671
rs4245739	1	204518842	147	10	44	3	exm141258	rs41299595	-0.385	0.001815	MDM4	NS	2.182	0.0098	0.00145792	0.517	0.54	0.001398	<<	0.36	0.002481	NA	NA	0	2.118	0.19	0.002304	3.92	0.0011	0.002378	1.144	0.201	1.516	0.00546	1.179	0.21	1.407	0.0796	0.952	0.826	1.468	0.199
							exm141591	rs7545613	447.56	0.001564	NFASC	NS	0.803	0.015	0.0485752	0.762	0.0046	0.1633	<<	0.38	0.001241	>>	0.84	0	1.598	0.14	0.009217	0.443	0.34	0.002081	0.974	0.384	0.773	0.203	0.998	0.95	0.632	0.106	0.999	0.982	1.046	0.904
							exm140657	NA	-320.667	NA	PLEKHA6	NS	>>	0.049	0	>>	0.048	0	NA	NA	0	NA	NA	0	NA	NA	0	NA	NA	0	1.028	0.354	1.012	0.93	1.066	0.0857	0.966	0.841	1.013	0.854	0.689	0.381
							exm141347	rs145298314	69.602	NA	LRRN2	NS	7.188	0.06	6.62691e-05	7.525	0.053	0.000233	NA	NA	0	NA	NA	0	NA	NA	0	NA	NA	0	0.987	0.522	1.032	0.836	0.982	0.457	1.089	0.649	0.966	0.463	0.815	0.572
							exm141119	rs61755372	-89.115	NA	PIK3C2B	NS	0.181	0.065	0.000795229	<<	0.56	0.000233	NA	NA	0	NA	NA	0	0.286	0.21	0.002688	<<	0.21	0.001189	1.037	0.548	1.084	0.254	1.029	0.703	1.099	0.284	1.031	0.806	1.128	0.393
							exm140906	rs137955986	-138.61	NA	PPP1R15B	NS	<<	0.078	0.000463883	<<	0.64	0.000233	<<	0.46	0.001241	NA	NA	0	<<	0.28	0.001152	<<	0.35	0.0005945	1.072	0.229	1.047	0.656	1.127	0.0897	1.101	0.455	0.943	0.661	0.847	0.512
							exm140408	NA	-426.755	NA	SOX13	NS	<<	0.085	0.000397773	<<	0.62	0.000233	NA	NA	0	NA	NA	0	<<	0.33	0.000768	<<	0.22	0.0008918	0.987	0.872	0.906	0.426	0.887	0.25	0.721	0.0561	0.943	0.723	0.941	0.821
							exm140456	rs140658518	-412.505	NA	ETNK2	NS	1.999	0.11	0.000795334	16.532	0.00089	0.0002331	>>	0.15	0	NA	NA	0	<<	0.37	0.000768	1.084	0.89	0.002675	0.986	0.685	1.388	0.354	1.005	0.9	1.448	0.375	1.012	0.884	0.728	0.757
							exm140581	rs192636495	-359.141	2e-06	KISS1	NS	0.764	0.18	0.00702545	3.009	0.45	0.000233	0.503	0.23	0.01737	0.78	0.26	0.02263	NA	NA	0	NA	NA	0	0.904	0.109	0.764	0.181	0.921	0.303	0.703	0.175	0.76	0.053	0.66	0.482
							exm140535	rs11571117	-390.275	0.014539	REN	NS	0.924	0.57	0.017495	0.901	0.48	0.05895	<<	0.49	0.001241	NA	NA	0	1.292	0.62	0.00384	>>	0.32	0	0.922	0.557	0.778	0.83	0.692	0.0677	<<	0.383	0.687	0.22	<<	0.599
rs12710696	2	19320803	2	1	0	0	exm174734	rs142934357	232.301	0	OSR1	NS	1.533	0.13	0.0027833	1.545	0.15	0.009087	NA	NA	0	NA	NA	0	0.825	0.85	0.001152	>>	0.21	0	1.417	0.18	1.417	0.18	1.073	0.848	1.073	0.848	1.647	0.294	1.647	0.294
rs4849887	2	121245122	27	4	0	0	exm224195	rs149091975	498.934	0	GLI2	NS	5.434	0.0089	0.000198807	2.414	0.32	0.000699	NA	NA	0	>>	0.84	0	>>	0.037	0	>>	0.22	0	1.013	0.441	0.853	0.0903	1.017	0.418	0.799	0.0708	0.985	0.687	0.748	0.196
							exm223935	rs114745805	-355.924	NA	EPB41L5	NS	0.746	0.18	0.00762397	0.802	0.34	0.02401	<<	0.28	0.002481	NA	NA	0	0.615	0.5	0.003072	<<	0.33	0.0005945	1.037	0.207	0.977	0.839	1.033	0.361	1.074	0.613	1.048	0.459	0.723	0.241
							exm224020	rs142763860	-138.271	NA	INHBB	NS	<<	0.35	0.000198807	<<	0.44	0.000466	NA	NA	0	NA	NA	0	NA	NA	0	<<	0.56	0.0002973	<<	0.35	<<	0.35	<<	0.489	<<	0.489	<<	0.698	<<	0.698
							exm2273819	rs11550347	-264.694	0.001	TMEM185B	NS	1.01	0.76	0.398012	0.956	0.51	0.5685	1.205	0.15	0.3213	0.975	0.7	0.3293	1.029	0.7	0.3537	1.043	0.52	0.3154	1.01	0.763	NA	NA	0.989	0.792	NA	NA	1.017	0.821	NA	NA
rs2016394	2	172972971	42	7	10	2	exm241919	NA	-401.098	NA	DYNC1I2	NS	>>	0.016	0	NA	NA	0	NA	NA	0	>>	0.036	0	NA	NA	0	>>	0.25	0	1.246	0.654	1.246	0.654	1.502	0.475	1.502	0.475	2.743	0.172	2.743	0.172
							exm242109	rs61996337	-37.33	0.001	METAP1D	NS	<<	0.023	0.00072896	NA	NA	0	<<	0.44	0.001241	NA	NA	0	<<	0.36	0.000768	<<	0.061	0.002378	0.955	0.378	0.707	0.277	0.931	0.27	0.478	0.113	1.293	0.0457	1.077	0.902
							exm242341	rs35661499	454.038	NA	PDK1	NS	1.506	0.06	0.00490586	1.479	0.078	0.01725	NA	NA	0	NA	NA	0	>>	0.24	0	NA	NA	0	1.393	0.0876	1.393	0.0876	1.405	0.171	1.405	0.171	1.629	0.169	1.629	0.169
							exm242288	rs61757096	381.387	NA	ITGA6	NS	<<	0.11	0.000331653	NA	NA	0	NA	NA	0	NA	NA	0	<<	0.33	0.000768	<<	0.22	0.0008918	1.024	0.504	0.712	0.117	1.026	0.557	0.381	0.00653	1.049	0.53	1.164	0.683
							exm241999	rs35881803	-281.711	0.003	SLC25A12	NS	0.74	0.19	0.00543406	1.257	0.63	0.003961	<<	0.21	0.003722	<<	0.32	0.0002485	0.975	0.96	0.005376	0.657	0.17	0.01397	0.949	0.61	0.848	0.395	1.049	0.693	1.042	0.854	0.907	0.673	0.58	0.284
							exm242056	rs143140616	-131.86	NA	HAT1	NS	0.596	0.34	0.00159046	0.671	0.46	0.005359	NA	NA	0	NA	NA	0	<<	0.51	0.000384	NA	NA	0	1.057	0.637	0.678	0.289	1.056	0.721	0.682	0.42	0.999	0.997	0.385	0.328
							exm242185	rs142362355	-6.019	NA	DLX2	NS	0.547	0.59	0.000265147	<<	0.57	0.000233	NA	NA	0	NA	NA	0	2.117	0.59	0.000384	<<	0.35	0.0005945	0.657	0.512	0.657	0.512	0.817	0.791	0.817	0.791	<<	0.383	<<	0.383
rs1550623	2	174212894	36	3	14	2	exm242666	rs80325830	-81.672	NA	ZAK	NS	1.985	0.0083	0.00258449	2.238	0.0028	0.008155	<<	0.42	0.001241	>>	0.65	0	1.243	0.89	0.000384	<<	0.37	0.0005945	0.999	0.97	1.091	0.534	1.047	0.25	1.028	0.883	0.889	0.0984	1.052	0.86
							exm242525	NA	-321.039	NA	RAPGEF4	NS	>>	0.094	0	NA	NA	0	NA	NA	0	NA	NA	0	NA	NA	0	>>	0.088	0	0.822	0.282	0.822	0.282	0.794	0.333	0.794	0.333	1.032	0.929	1.032	0.929
							exm242692	rs139109928	11.321	NA	CDCA7	NS	3.98	0.29	6.62691e-05	4.009	0.29	0.000233	NA	NA	0	NA	NA	0	NA	NA	0	NA	NA	0	0.838	0.826	0.838	0.826	0.759	0.797	0.759	0.797	<<	0.599	<<	0.599
rs1045485	2	202149589	147	17	30	4	exm256840	rs3769823	-26.594	0.06314	CASP8	NS	1.108	0.0015	0.358714	1.129	0.072	0.4115	1.143	0.33	0.2432	1.202	0.0032	0.3228	0.985	0.83	0.4305	1.101	0.15	0.3065	1.075	0.0231	1.398	0.256	1.07	0.0902	1.341	0.435	1.123	0.105	1.798	0.269
							exm257381	rs190854787	365.26	0	MPP4	NS	>>	0.0039	0	>>	0.0035	0	NA	NA	0	NA	NA	0	NA	NA	0	NA	NA	0	1.043	0.269	1.001	0.995	1.054	0.269	1.07	0.786	1.039	0.657	0.699	0.544
							exm256641	rs139161817	-296.452	NA	FAM126B	NS	>>	0.0083	0	>>	0.11	0	NA	NA	0	NA	NA	0	>>	0.14	0	NA	NA	0	1.54	0.16	1.54	0.16	1.302	0.53	1.302	0.53	2.009	0.189	2.009	0.189
							exm257204	rs6743951	208.806	0.003297	ALS2CR11	NS	0.82	0.0091	0.0553567	0.745	0.0083	0.1175	0.774	0.59	0.02233	<<	0.57	0.0002485	1.084	0.64	0.04035	0.823	0.16	0.06153	0.959	0.0598	0.936	0.393	0.96	0.139	0.881	0.207	0.929	0.134	0.779	0.166
							exm257034	rs2244438	102.95	0.15336	TRAK2	NS	1.089	0.01	0.298741	1.21	0.0095	0.2372	1.208	0.19	0.2208	1.176	0.01	0.3074	0.968	0.65	0.3906	1.002	0.98	0.3145	1.02	0.271	0.989	0.952	1.03	0.18	1.149	0.523	1.043	0.299	1.219	0.56
							exm256948	rs147899975	45.611	NA	ALS2CR12	NS	2.145	0.038	0.000994036	NA	NA	0	2.172	0.039	0.01737	NA	NA	0	NA	NA	0	<<	0.64	0.0002973	1.389	0.139	1.389	0.139	1.359	0.274	1.359	0.274	1.322	0.557	1.322	0.557
							exm256561	rs150650400	-364.632	NA	ORC2	NS	4.306	0.043	0.000198807	2.571	0.29	0.000699	NA	NA	0	NA	NA	0	>>	0.052	0	NA	NA	0	1.943	0.051	1.943	0.051	2.255	0.0386	2.255	0.0386	0.672	0.699	0.672	0.699
							exm257599	rs3219156	476.026	0.002651	ALS2	NS	1.11	0.064	0.091385	1.226	0.011	0.189	0.516	0.11	0.03598	0.823	0.82	0.000994	1.002	0.98	0.07911	1.069	0.52	0.0978	1.079	0.0998	1.059	0.641	1.038	0.524	0.91	0.563	1.202	0.052	0.941	0.817
							exm257335	NA	347.299	NA	TMEM237	NS	<<	0.09	0.000397614	NA	NA	0	NA	NA	0	NA	NA	0	<<	0.25	0.001152	<<	0.19	0.0008918	0.924	0.258	1.176	0.474	0.887	0.182	1.455	0.159	1.001	0.994	1.196	0.679
							exm256810	rs80358239	-75.503	NA	CASP10	NS	1.783	0.12	0.00112657	0.562	0.6	0.001165	NA	NA	0	NA	NA	0	5.888	0.017	0.000768	1.531	0.39	0.002973	1.134	0.0807	1.521	0.159	1.102	0.28	1.135	0.754	1.335	0.0495	1.088	0.909
							exm256473	rs7562391	-413.423	0.051557	PPIL3	NS	0.924	0.12	0.15328	0.973	0.7	0.3588	0.378	0.0025	0.07196	0.929	0.93	0.001243	1.039	0.74	0.09716	0.85	0.092	0.1359	0.92	0.0968	0.813	0.527	0.918	0.179	1.017	0.965	0.892	0.286	1.402	0.524
							exm256709	rs10190751	-143.493	0.032136	CFLAR	SP	0.934	0.12	0.19537	0.859	0.024	0.4098	0.76	0.18	0.1191	1.2	0.5	0.01097	1.088	0.4	0.1364	0.968	0.68	0.2057	0.933	0.0946	0.756	0.497	0.959	0.422	0.616	0.412	0.861	0.0945	<<	0.168
							exm256543	rs190698962	-385.417	NA	NIF3L1	NS	<<	0.13	0.000463883	<<	0.2	0.001398	NA	NA	0	NA	NA	0	<<	0.47	0.000384	NA	NA	0	0.946	0.188	0.876	0.444	0.984	0.765	1.058	0.778	0.891	0.214	0.647	0.391
							exm256464	rs140874256	-420.731	0.001909	CLK1	NS	3.123	0.19	0.000132538	NA	NA	0	NA	NA	0	NA	NA	0	2.005	0.48	0.000768	>>	0.16	0	0.802	0.35	0.802	0.35	1.163	0.565	1.163	0.565	0.56	0.321	0.56	0.321
							exm257110	rs111941783	185.099	NA	STRADB	NS	<<	0.24	0.000331477	<<	0.26	0.001166	NA	NA	0	NA	NA	0	NA	NA	0	NA	NA	0	<<	0.236	<<	0.236	<<	0.375	<<	0.375	<<	0.614	<<	0.614
							exm256675	rs144513268	-205.965	NA	NDUFB3	NS	<<	0.47	6.62691e-05	NA	NA	0	NA	NA	0	NA	NA	0	NA	NA	0	<<	0.44	0.0002973	<<	0.471	<<	0.471	<<	0.576	<<	0.576	<<	0.787	<<	0.787
							exm256379	NA	-469.178	NA	BZW1	NS	1.059	0.95	0.000265076	<<	0.57	0.000233	<<	0.52	0.001241	NA	NA	0	NA	NA	0	2.017	0.48	0.0005945	1.059	0.947	1.059	0.947	1.83	0.482	1.83	0.482	<<	0.594	<<	0.594
rs13387042	2	217905832	9	3	0	0	exm264052	NA	-181.187	NA	TNP1	NS	>>	0.15	0	NA	NA	0	NA	NA	0	NA	NA	0	NA	NA	0	>>	0.18	0	2.262	0.117	2.262	0.117	1.434	0.645	1.434	0.645	1.698	0.617	1.698	0.617
							exm264030	rs11575194	-362.104	0.001	IGFBP5	NS	1.085	0.5	0.0153744	0.967	0.91	0.01142	0.164	0.052	0.01489	3.148	0.42	0.0002485	1.157	0.53	0.02151	1.161	0.37	0.03389	1.067	0.575	0.887	0.772	1.128	0.389	1.006	0.99	1.369	0.166	<<	0.247
							exm263987	NA	-380.333	NA	IGFBP2	NS	1.925	0.51	0.000132538	NA	NA	0	NA	NA	0	NA	NA	0	NA	NA	0	2.137	0.44	0.0005945	0.999	0.999	0.999	0.999	1.153	0.823	1.153	0.823	<<	0.357	<<	0.357
rs16857609	2	218296508	54	1	0	0	exm264179	rs112371945	390.135	0	TNS1	NS	5.967	0.018	0.000132538	>>	0.056	0	<<	0.52	0.001241	NA	NA	0	>>	0.17	0	7.543	0.04	0.0002973	0.985	0.292	0.94	0.327	0.993	0.687	0.952	0.535	0.963	0.248	1.003	0.984
rs6762644	3	4742276	44	6	18	1	exm286354	rs142644220	-387.695	NA	SETMAR	SP	>>	0.0014	0	>>	0.0011	0	NA	NA	0	NA	NA	0	NA	NA	0	NA	NA	0	1	0.994	1.539	0.277	1.058	0.289	1.355	0.551	0.884	0.213	1.823	0.425
							exm286604	NA	-25.391	NA	ITPR1	NS	<<	0.1	0.000397614	<<	0.57	0.000233	NA	NA	0	NA	NA	0	<<	0.53	0.000384	<<	0.16	0.001189	0.991	0.762	0.928	0.456	1.019	0.619	0.825	0.14	0.917	0.224	0.858	0.523
							exm286883	rs140778954	487.223	NA	EDEM1	NS	5.19	0.14	6.62691e-05	>>	0.049	0	NA	NA	0	NA	NA	0	NA	NA	0	2.499	0.5	0.0002973	1.066	0.606	1.066	0.606	0.975	0.875	0.975	0.875	1.439	0.134	1.439	0.134
							exm286813	rs115754733	282.458	NA	BHLHE40	NS	0.544	0.16	0.00245195	0.629	0.28	0.007922	NA	NA	0	NA	NA	0	<<	0.24	0.001152	NA	NA	0	0.653	0.237	0.653	0.237	0.668	0.386	0.668	0.386	0.347	0.271	0.347	0.271
							exm286486	rs143616931	-280.529	NA	SUMF1	SP	4.233	0.27	6.62691e-05	4.172	0.27	0.000233	NA	NA	0	NA	NA	0	NA	NA	0	NA	NA	0	0.94	0.665	1.064	0.828	0.771	0.191	0.616	0.266	1.57	0.0576	2.589	0.0182
							exm286874	rs142243427	473.796	0	ARL8B	NS	1.463	0.4	0.000861498	<<	0.62	0.000233	<<	0.55	0.001241	NA	NA	0	3.245	0.18	0.000768	1.298	0.64	0.002675	1.463	0.399	1.463	0.399	1.897	0.192	1.897	0.192	1.565	0.667	1.565	0.667
rs4973768	3	27416013	29	3	27	2	exm296276	rs142072563	74.146	0.001	SLC4A7	NS	>>	0.041	0	NA	NA	0	NA	NA	0	NA	NA	0	>>	0.042	0	NA	NA	0	1.027	0.458	0.988	0.925	1.01	0.828	0.901	0.542	0.965	0.664	1.179	0.537
							exm296103	rs10510592	-83.193	0.387	NEK10	NS	1.057	0.17	0.191518	1.084	0.36	0.1626	1.053	0.78	0.1266	1.027	0.81	0.07306	1.056	0.46	0.3583	1.049	0.51	0.2565	1.029	0.148	0.97	0.773	1.036	0.151	0.919	0.533	1.049	0.274	0.92	0.716
							exm296327	NA	343.195	NA	EOMES	NS	2.061	0.6	6.62691e-05	NA	NA	0	NA	NA	0	NA	NA	0	<<	0.46	0.000384	>>	0.094	0	1.06	0.823	1.06	0.823	0.808	0.539	0.808	0.539	1.241	0.678	1.241	0.678
rs12493607	3	30682939	18	2	10	2	exm296600	rs35766612	30.895	0.001	TGFBR2	NS	0.288	0.078	0.0010603	1.888	0.6	0.000466	<<	0.5	0.001241	NA	NA	0	<<	0.53	0.000384	0.176	0.061	0.003567	1.149	0.37	1.149	0.37	1.389	0.0633	1.389	0.0633	0.453	0.166	0.453	0.166
							exm296663	rs148768763	192.435	NA	GADL1	NS	<<	0.13	0.000397614	<<	0.53	0.000466	<<	0.5	0.001241	NA	NA	0	NA	NA	0	<<	0.3	0.0008918	0.981	0.851	1.001	0.995	1.009	0.94	1.064	0.708	1.048	0.826	1.204	0.478
rs9790517	4	106084778	45	3	22	1	exm417157	rs140625801	425.765	NA	ARHGEF38	NS	3.274	0.013	0.000530152	2.97	0.029	0.001864	NA	NA	0	NA	NA	0	NA	NA	0	>>	0.18	0	0.986	0.781	1.346	0.04	0.975	0.698	1.278	0.19	1.137	0.244	1.5	0.123
							exm417006	rs75056899	73.572	0.02	TET2	NS	2.076	0.021	0.00145792	0.386	0.35	0.002097	>>	0.031	0	NA	NA	0	3.327	0.054	0.001536	2.149	0.1	0.002675	0.978	0.349	0.982	0.778	0.991	0.747	1.011	0.888	0.907	0.0692	0.796	0.159
							exm417133	rs35571699	310.366	0.007	PPA2	NS	0.765	0.068	0.0127916	0.432	0.099	0.007922	0.702	0.51	0.01737	<<	0.15	0.000497	0.964	0.89	0.01843	0.792	0.26	0.02826	1.018	0.596	1.024	0.864	1.018	0.68	0.932	0.696	1.044	0.576	0.963	0.905
rs6828523	4	175846426	25	3	12	2	exm434716	NA	51.293	NA	ADAM29	NS	>>	0.014	0	>>	0.039	0	NA	NA	0	NA	NA	0	NA	NA	0	>>	0.13	0	0.988	0.861	0.963	0.867	0.913	0.309	1.033	0.905	0.701	0.0865	0.226	0.108
							exm434651	rs138454135	-196.628	NA	GLRA3	NS	<<	0.14	0.000397614	NA	NA	0	NA	NA	0	<<	0.16	0.001491	NA	NA	0	NA	NA	0	0.968	0.91	0.968	0.91	1.335	0.361	1.335	0.361	0.346	0.271	0.346	0.271
							exm434584	NA	-431.982	NA	HPGD	NS	4.205	0.27	6.62691e-05	4.154	0.28	0.000233	NA	NA	0	NA	NA	0	NA	NA	0	NA	NA	0	0.852	0.422	0.852	0.422	0.712	0.197	0.712	0.197	0.671	0.435	0.671	0.435
rs10069690	5	1279790	154	11	72	4	exm441548	rs148501261	-201.817	NA	SLC12A7	NS	1.948	0.0025	0.00331609	1.586	0.085	0.01027	>>	0.11	0	6.056	0.1	0.0002485	2.715	0.12	0.001154	2.971	0.23	0.0005945	0.992	0.64	1.09	0.298	0.995	0.817	1.118	0.279	0.952	0.224	0.872	0.482
							exm441836	rs7728667	-54.164	0.016	SLC6A18	NS	1.1	0.0066	0.249569	1.083	0.34	0.1873	1.535	0.0014	0.2407	1.058	0.37	0.3559	1.12	0.16	0.2231	1.034	0.65	0.2244	1.043	0.00903	0.96	0.542	1.028	0.164	1.095	0.239	1.037	0.308	0.698	0.0636
							exm2084992	rs139235771	-60.143	NA	SLC6A19	NS	>>	0.018	0	NA	NA	0	>>	0.11	0	>>	0.086	0	NA	NA	0	NA	NA	0	1.023	0.552	0.964	0.793	0.983	0.718	0.773	0.18	0.965	0.669	1.654	0.054
							exm442267	NA	65.037	NA	CLPTM1L	ST	>>	0.049	0	>>	0.071	0	NA	NA	0	NA	NA	0	NA	NA	0	NA	NA	0	0.911	0.343	0.889	0.381	0.902	0.402	0.892	0.498	0.83	0.414	1.012	0.965
							exm442293	rs28364997	123.338	NA	SLC6A3	NS	7.098	0.049	6.62691e-05	NA	NA	0	>>	0.17	0	NA	NA	0	NA	NA	0	4.723	0.16	0.0002973	1.063	0.692	1.063	0.692	1.065	0.743	1.065	0.743	1.953	0.0159	1.953	0.0159
							exm442408	rs144081179	184.142	0	LPCAT1	NS	3.193	0.061	0.000265076	NA	NA	0	2.123	0.59	0.001241	NA	NA	0	>>	0.016	0	1.594	0.61	0.0008918	0.87	0.389	0.87	0.389	0.808	0.325	0.808	0.325	1.007	0.982	1.007	0.982
							exm441282	rs139374291	-247.472	0	NKD2	NS	>>	0.075	0	NA	NA	0	NA	NA	0	NA	NA	0	>>	0.11	0	NA	NA	0	1.179	0.148	1.179	0.148	1.118	0.449	1.118	0.449	1.426	0.0899	1.426	0.0899
							exm442133	rs61748181	14.376	0.033	TERT	NS	1.278	0.081	0.010008	1.051	0.89	0.007922	2.083	0.3	0.004963	0.434	0.51	0.000497	1.359	0.36	0.008449	1.295	0.15	0.02647	1.246	0.05	1.193	0.345	1.287	0.065	1.213	0.396	1.192	0.496	0.596	0.376
							exm2106301	NA	-362.577	NA	TRIP13	NS	<<	0.25	0.000265076	<<	0.53	0.000233	NA	NA	0	<<	0.3	0.0007455	NA	NA	0	NA	NA	0	1.002	0.994	1.002	0.994	0.945	0.847	0.945	0.847	1.119	0.774	1.119	0.774
							exm441185	rs34292369	-393.046	0.003	BRD9	NS	0.934	0.5	0.0351889	0.924	0.46	0.1165	0.697	0.78	0.002481	NA	NA	0	1.144	0.71	0.008065	1.255	0.71	0.002378	0.929	0.457	0.766	0.646	0.892	0.376	1.333	0.622	0.901	0.593	<<	0.388
							exm440987	NA	-460.118	NA	ZDHHC11	NS	0.008	0.53	0.000132626	0.005	0.56	0.0004662	NA	NA	0	NA	NA	0	NA	NA	0	NA	NA	0	0.997	0.974	1.076	0.812	0.916	0.494	0.7	0.449	1.183	0.464	1.934	0.105
rs10941679	5	44706498	13	2	0	0	exm2101010	rs145293565	102.91	NA	MRPS30	NS	2.62	0.031	0.000596422	NA	NA	0	>>	0.021	0	1.923	0.19	0.002237	NA	NA	0	NA	NA	0	1.088	0.537	1.088	0.537	0.975	0.886	0.975	0.886	1.223	0.49	1.223	0.49
							exm453796	rs145373611	-317.81	NA	FGF10	NS	0.554	0.27	0.001723	0.551	0.26	0.006058	NA	NA	0	NA	NA	0	NA	NA	0	NA	NA	0	0.774	0.52	0.774	0.52	0.915	0.855	0.915	0.855	1.506	0.502	1.506	0.502
rs889312	5	56031884	29	4	0	0	exm455921	rs56069227	123.788	0.084	MAP3K1	NS	0.721	0.013	0.0175613	0.563	0.023	0.02586	1.481	0.52	0.008685	NA	NA	0	0.531	0.051	0.01805	0.892	0.54	0.02973	0.971	0.385	0.98	0.927	0.908	0.0237	1.029	0.914	0.957	0.568	0.726	0.587
							exm456095	NA	177.836	NA	C5orf35	ST	>>	0.1	0	NA	NA	0	NA	NA	0	>>	0.08	0	NA	NA	0	NA	NA	0	1.004	0.914	0.57	0.315	1.068	0.11	0.516	0.374	0.943	0.426	<<	0.284
							exm456194	rs144985456	494.911	NA	GPBP1	SP	4.97	0.15	6.62691e-05	NA	NA	0	NA	NA	0	NA	NA	0	>>	0.13	0	3.063	0.41	0.0002973	0.891	0.415	0.891	0.415	0.732	0.106	0.732	0.106	0.683	0.269	0.683	0.269
							exm456134	rs150526244	187.505	0.001	MIER3	NS	<<	0.16	0.000265076	NA	NA	0	NA	NA	0	NA	NA	0	NA	NA	0	<<	0.16	0.001189	1.097	0.828	1.097	0.828	1.132	0.808	1.132	0.808	2.554	0.129	2.554	0.129
rs10472076	5	58184061	12	4	3	1	exm2102108	NA	-432.127	NA	PLK2	NS	<<	0.028	0.00079565	NA	NA	0	NA	NA	0	<<	0.031	0.002985	NA	NA	0	NA	NA	0	0.928	0.739	0.928	0.739	0.961	0.886	0.961	0.886	0.539	0.282	0.539	0.282
							exm456423	rs147191680	-393.368	0.00555	GAPT	NS	0.68	0.26	0.00238569	0.583	0.62	0.001165	>>	0.22	0	NA	NA	0	0.788	0.73	0.003072	0.566	0.21	0.006837	0.805	0.394	0.805	0.394	0.944	0.849	0.944	0.849	0.44	0.244	0.44	0.244
							exm456437	rs150626053	-270.447	NA	RAB3C	NS	<<	0.26	0.000198833	NA	NA	0	NA	NA	0	NA	NA	0	<<	0.3	0.001152	NA	NA	0	0.905	0.88	0.905	0.88	1.115	0.888	1.115	0.888	1.516	0.691	1.516	0.691
							exm456503	rs16889108	150.861	0.001114	PDE4D	NS	0.831	0.41	0.00524917	0.612	0.52	0.002564	1.304	0.78	0.003722	>>	0.23	0	0.554	0.29	0.005765	0.836	0.52	0.0149	0.827	0.367	0.827	0.367	0.893	0.656	0.893	0.656	1.222	0.638	1.222	0.638
rs1353747	5	58337481	5	2	1	1	exm456437	rs150626053	-423.867	NA	RAB3C	NS	<<	0.26	0.000198833	NA	NA	0	NA	NA	0	NA	NA	0	<<	0.3	0.001152	NA	NA	0	0.905	0.88	0.905	0.88	1.115	0.888	1.115	0.888	1.516	0.691	1.516	0.691
							exm456503	rs16889108	-2.559	0	PDE4D	NS	0.831	0.41	0.00524917	0.612	0.52	0.002564	1.304	0.78	0.003722	>>	0.23	0	0.554	0.29	0.005765	0.836	0.52	0.0149	0.827	0.367	0.827	0.367	0.893	0.656	0.893	0.656	1.222	0.638	1.222	0.638
rs1432679	5	158244083	6	4	0	0	exm500105	NA	386.559	NA	RNF145	NS	<<	0.29	0.000198807	NA	NA	0	NA	NA	0	<<	0.31	0.0007455	NA	NA	0	NA	NA	0	0.43	0.257	0.43	0.257	0.747	0.702	0.747	0.702	<<	0.49	<<	0.49
							exm500148	NA	499.636	NA	IL12B	NS	<<	0.58	6.62691e-05	NA	NA	0	NA	NA	0	NA	NA	0	NA	NA	0	<<	0.61	0.0002973	0.973	0.754	0.888	0.538	1.059	0.589	1.048	0.838	0.543	0.0171	0.385	0.093
							exm500141	rs143930026	458.171	NA	UBLCP1	SP	0.552	0.59	0.000265076	NA	NA	0	NA	NA	0	NA	NA	0	<<	0.31	0.000768	1.365	0.8	0.0005945	0.552	0.592	0.552	0.592	0.917	0.939	0.917	0.939	<<	0.661	<<	0.661
							exm499983	rs146847386	-104.855	NA	EBF1	NS	0.938	0.85	0.00251822	1.074	0.85	0.007689	NA	NA	0	NA	NA	0	0.385	0.37	0.00192	NA	NA	0	0.938	0.854	0.938	0.854	0.939	0.887	0.939	0.887	<<	0.0987	<<	0.0987
rs11242675	6	1318878	2	2	2	2	exm512480	rs142547284	76.184	NA	FOXF2	NS	8.869	0.019	6.62778e-05	NA	NA	0	NA	NA	0	NA	NA	0	>>	0.011	0	4.107	0.31	0.0002973	8.868	0.0194	8.868	0.0194	4.179	0.272	4.179	0.272	26.512	0.00012	26.512	0.00012
							exm512413	NA	-5.148	NA	FOXQ1	NS	0.333	0.29	0.000397667	<<	0.57	0.000233	NA	NA	0	NA	NA	0	0.509	0.54	0.001537	<<	0.42	0.0002973	0.333	0.288	0.333	0.288	<<	0.194	<<	0.194	<<	0.481	<<	0.481
rs204247	6	13722523	39	8	6	2	exm517372	rs145972102	-126.758	NA	SIRT5	NS	2.278	0.016	0.00132538	2.181	0.026	0.00466	NA	NA	0	NA	NA	0	>>	0.16	0	NA	NA	0	0.987	0.711	0.894	0.422	0.967	0.442	0.854	0.384	1.023	0.774	0.953	0.871
							exm517512	rs144473823	-11.242	NA	RANBP9	NS	0.334	0.033	0.00172345	<<	0.46	0.0004662	NA	NA	0	NA	NA	0	0.84	0.84	0.00192	0.221	0.027	0.005651	0.75	0.119	0.75	0.119	0.853	0.48	0.853	0.48	0.507	0.131	0.507	0.131
							exm517563	rs141658121	84.697	NA	CCDC90A	NS	0.162	0.045	0.000927767	<<	0.62	0.000233	<<	0.58	0.001241	NA	NA	0	0.273	0.19	0.003072	<<	0.25	0.001189	0.997	0.938	0.162	0.045	0.992	0.881	0.293	0.209	0.94	0.571	<<	0.311
							exm517428	rs150690716	-105.813	NA	NOL7	NS	0.332	0.063	0.00132538	<<	0.26	0.000932	NA	NA	0	NA	NA	0	<<	0.096	0.002304	0.639	0.5	0.002973	0.915	0.618	0.915	0.618	1.033	0.881	1.033	0.881	0.861	0.706	0.861	0.706
							exm517233	rs144743739	-401.243	0.001	TBC1D7	NS	>>	0.13	0	>>	0.11	0	NA	NA	0	NA	NA	0	NA	NA	0	NA	NA	0	1.003	0.977	1.144	0.351	0.992	0.949	1.162	0.393	1.106	0.629	1.525	0.167
							exm517666	rs77596175	409.379	NA	CD83	NS	1.519	0.21	0.00198834	1.483	0.25	0.00699	NA	NA	0	NA	NA	0	>>	0.5	0	NA	NA	0	1.007	0.912	1.261	0.441	0.94	0.436	1.221	0.604	0.945	0.672	0.825	0.789
							exm2111509	rs117125202	-356.76	NA	GFOD1	NS	1.903	0.28	0.000397614	NA	NA	0	NA	NA	0	1.746	0.36	0.001491	NA	NA	0	NA	NA	0	1.898	0.284	1.898	0.284	2.506	0.144	2.506	0.144	<<	0.591	<<	0.591
							exm517591	rs145040153	254.946	NA	RNF182	NS	0.553	0.34	0.00119284	0.397	0.2	0.004194	NA	NA	0	>>	0.84	0	NA	NA	0	NA	NA	0	0.518	0.284	0.518	0.284	0.671	0.592	0.671	0.592	0.686	0.715	0.686	0.715
rs17529111	6	82128386	4	1	0	0	exm562832	rs140052179	333.337	NA	FAM46A	NS	1.508	0.29	0.00145792	1.603	0.24	0.00466	NA	NA	0	NA	NA	0	1.056	0.96	0.000768	NA	NA	0	0.99	0.95	0.99	0.95	1.111	0.574	1.111	0.574	0.36	0.0372	0.36	0.0372
rs9485372	6	149608874	59	9	4	1	exm585196	rs143622120	-400.729	NA	UST	NS	12.822	0.0045	6.62691e-05	13.543	0.0036	0.000233	NA	NA	0	NA	NA	0	NA	NA	0	NA	NA	0	1.358	0.0486	1.358	0.0486	1.255	0.239	1.255	0.239	1.381	0.34	1.381	0.34
							exm585682	rs150329472	443.904	NA	NUP43	NS	3.504	0.062	0.000265076	3.731	0.048	0.000932	NA	NA	0	NA	NA	0	NA	NA	0	NA	NA	0	0.936	0.613	1.551	0.183	0.797	0.208	1.013	0.978	0.816	0.456	1.429	0.588
							exm585608	rs150904756	395.742	NA	LATS1	NS	<<	0.069	0.000795229	<<	0.073	0.002563	NA	NA	0	NA	NA	0	<<	0.59	0.000384	NA	NA	0	1.096	0.256	1.139	0.223	1.038	0.721	1.095	0.506	0.959	0.815	0.97	0.902
							exm585394	rs116340837	186.597	NA	ZC3H12D	NS	1.591	0.097	0.00284957	1.673	0.073	0.009553	NA	NA	0	NA	NA	0	1.096	0.94	0.000768	NA	NA	0	0.991	0.886	1.022	0.869	0.981	0.809	1.024	0.89	0.961	0.759	1.021	0.935
							exm585493	rs1137086	294.723	0.002	C6orf72	NS	1.201	0.12	0.0153082	1.183	0.56	0.01212	1.196	0.78	0.008685	0.389	0.57	0.0002485	1.41	0.13	0.01843	1.098	0.57	0.03656	1.165	0.101	1.106	0.503	1.129	0.306	0.97	0.882	1.248	0.247	1.204	0.512
							exm585518	rs116762085	309.874	NA	KATNA1	NS	1.445	0.17	0.00318091	1.525	0.13	0.01048	NA	NA	0	NA	NA	0	0.267	0.33	0.001152	>>	0.092	0	1.255	0.193	1.255	0.193	1.371	0.143	1.371	0.143	1.113	0.757	1.113	0.757
							exm585324	NA	112.941	NA	SUMO4	ST	3.494	0.19	0.000132538	3.558	0.18	0.000466	NA	NA	0	NA	NA	0	NA	NA	0	NA	NA	0	0.976	0.455	1.005	0.981	0.978	0.573	0.944	0.85	0.992	0.915	1.064	0.895
							exm585422	rs149512214	224.444	NA	PPIL4	NS	0.315	0.25	0.000463883	NA	NA	0	NA	NA	0	NA	NA	0	1.149	0.91	0.000768	<<	0.14	0.001486	0.984	0.954	0.984	0.954	0.914	0.813	0.914	0.813	0.977	0.969	0.977	0.969
							exm585269	rs113049462	91.051	NA	TAB2	NS	2.259	0.25	0.000331433	2.147	0.29	0.001165	NA	NA	0	NA	NA	0	NA	NA	0	NA	NA	0	1.259	0.696	1.259	0.696	1.126	0.879	1.126	0.879	1.592	0.659	1.592	0.659
rs3757318	6	151914113	111	6	31	1	exm586880	rs9478198	-240.7	8e-06	AKAP12	NS	0.42	0.0071	0.00390987	<<	0.14	0.001864	<<	0.15	0.004963	NA	NA	0	0.232	0.13	0.003456	0.58	0.13	0.0113	0.994	0.53	1.094	0.292	0.999	0.928	1.128	0.251	0.964	0.101	0.947	0.782
							exm587183	NA	-6.986	NA	C6orf97	NS	8.461	0.023	6.62691e-05	NA	NA	0	NA	NA	0	NA	NA	0	>>	0.1	0	6.186	0.073	0.0002973	0.971	0.278	1.185	0.106	1.022	0.51	1.166	0.243	0.936	0.274	1.357	0.124
							exm587288	rs77797873	351.33	0	ESR1	NS	<<	0.073	0.000530152	<<	0.46	0.000466	<<	0.49	0.001241	NA	NA	0	<<	0.47	0.000384	<<	0.2	0.001189	0.998	0.992	0.998	0.992	1.085	0.707	1.085	0.707	0.819	0.613	0.819	0.613
							exm2113929	rs190485049	-175.597	NA	RMND1	NS	<<	0.1	0.000397614	NA	NA	0	NA	NA	0	<<	0.094	0.001491	NA	NA	0	NA	NA	0	1.106	0.484	1.412	0.236	1.213	0.279	1.647	0.131	0.856	0.62	0.942	0.935
							exm586999	rs142563728	-226.109	0.004649	ZBTB2	NS	<<	0.1	0.000397614	<<	0.53	0.000233	NA	NA	0	NA	NA	0	NA	NA	0	<<	0.13	0.001486	<<	0.0837	<<	0.0837	<<	0.182	<<	0.182	<<	0.526	<<	0.526
							exm587097	rs34596084	-124.515	0.000498	C6orf211	NS	0.715	0.13	0.00775348	0.752	0.23	0.02493	>>	0.13	0	NA	NA	0	0.77	0.79	0.001536	<<	0.065	0.001784	1.019	0.674	0.669	0.0565	0.996	0.937	0.495	0.0237	0.863	0.161	0.954	0.899
rs2046210	6	151948366	117	7	31	1	exm586880	rs9478198	-274.953	0	AKAP12	NS	0.42	0.0071	0.00390987	<<	0.14	0.001864	<<	0.15	0.004963	NA	NA	0	0.232	0.13	0.003456	0.58	0.13	0.0113	0.994	0.53	1.094	0.292	0.999	0.928	1.128	0.251	0.964	0.101	0.947	0.782
							exm587183	NA	-41.239	NA	C6orf97	NS	8.461	0.023	6.62691e-05	NA	NA	0	NA	NA	0	NA	NA	0	>>	0.1	0	6.186	0.073	0.0002973	0.971	0.278	1.185	0.106	1.022	0.51	1.166	0.243	0.936	0.274	1.357	0.124
							exm587288	rs77797873	317.077	0.001	ESR1	NS	<<	0.073	0.000530152	<<	0.46	0.000466	<<	0.49	0.001241	NA	NA	0	<<	0.47	0.000384	<<	0.2	0.001189	0.998	0.992	0.998	0.992	1.085	0.707	1.085	0.707	0.819	0.613	0.819	0.613
							exm2113929	rs190485049	-209.85	NA	RMND1	NS	<<	0.1	0.000397614	NA	NA	0	NA	NA	0	<<	0.094	0.001491	NA	NA	0	NA	NA	0	1.106	0.484	1.412	0.236	1.213	0.279	1.647	0.131	0.856	0.62	0.942	0.935
							exm586999	rs142563728	-260.362	0	ZBTB2	NS	<<	0.1	0.000397614	<<	0.53	0.000233	NA	NA	0	NA	NA	0	NA	NA	0	<<	0.13	0.001486	<<	0.0837	<<	0.0837	<<	0.182	<<	0.182	<<	0.526	<<	0.526
							exm587097	rs34596084	-158.768	0.003	C6orf211	NS	0.715	0.13	0.00775348	0.752	0.23	0.02493	>>	0.13	0	NA	NA	0	0.77	0.79	0.001536	<<	0.065	0.001784	1.019	0.674	0.669	0.0565	0.996	0.937	0.495	0.0237	0.863	0.161	0.954	0.899
							exm587339	rs144206837	495.387	NA	SYNE1	NS	5.123	0.14	6.62691e-05	>>	0.07	0	NA	NA	0	NA	NA	0	NA	NA	0	2.158	0.58	0.0002973	0.999	0.867	1.003	0.934	0.995	0.674	0.977	0.584	1.009	0.634	1.059	0.397
rs720475	7	144074929	85	10	14	1	exm666866	NA	-373.389	NA	OR6B1	NS	>>	0.0025	0	>>	0.091	0	NA	NA	0	NA	NA	0	NA	NA	0	>>	0.01	0	0.992	0.814	0.977	0.913	0.999	0.984	0.885	0.661	0.915	0.24	1.065	0.894
							exm666901	rs184798997	-327.262	NA	OR2A5	NS	9.006	0.027	6.62778e-05	7	0.067	0.0002331	NA	NA	0	NA	NA	0	>>	0.17	0	NA	NA	0	0.997	0.864	1.086	0.622	0.987	0.6	0.995	0.983	1.033	0.436	1.018	0.957
							exm667034	rs80128486	-281.894	NA	OR2A12	NS	0.616	0.032	0.00841617	0.659	0.071	0.02842	NA	NA	0	NA	NA	0	0.487	0.51	0.001536	<<	0.47	0.0002973	1.012	0.801	0.927	0.546	1.014	0.814	1.048	0.758	1.002	0.985	0.729	0.279
							exm667119	rs77933816	-248.251	NA	OR2A14	NS	0.618	0.034	0.0083499	0.662	0.076	0.02819	NA	NA	0	NA	NA	0	0.487	0.51	0.001536	<<	0.47	0.0002973	1.009	0.777	0.738	0.0169	0.99	0.814	0.757	0.0875	1.001	0.991	0.947	0.813
							exm666998	rs150935125	-302.724	NA	OR2A25	NS	1.699	0.04	0.00304838	1.842	0.019	0.01025	NA	NA	0	NA	NA	0	<<	0.5	0.000384	<<	0.37	0.0002973	1.007	0.695	1.272	0.208	0.992	0.699	0.978	0.934	1.034	0.398	1.499	0.247
							exm666783	rs61746066	-441.946	NA	OR2F2	NS	0.539	0.072	0.00344645	0.438	0.17	0.005825	<<	0.45	0.001241	0.502	0.16	0.006216	>>	0.16	0	2.871	0.46	0.0002973	0.964	0.152	0.72	0.216	0.948	0.0979	0.782	0.453	1.008	0.883	0.471	0.285
							exm666820	rs116583353	-417.382	NA	OR2F1	NS	1.655	0.081	0.00258484	1.86	0.032	0.008621	NA	NA	0	NA	NA	0	<<	0.52	0.000384	<<	0.39	0.0002973	0.993	0.754	1.265	0.203	0.984	0.562	0.843	0.541	0.972	0.574	2.29	0.00334
							exm667392	rs1208216	19.684	0.075	NOBOX	NS	1.088	0.13	0.0800742	1.087	0.55	0.05638	1.162	0.57	0.05459	1.278	0.33	0.01193	1.144	0.18	0.1349	1.027	0.76	0.1556	1.03	0.24	1.007	0.957	1.046	0.147	1.049	0.777	1.032	0.568	1.069	0.794
							exm667074	rs10252253	-267.625	0.008	OR2A2	NS	1.043	0.36	0.170335	0.992	0.9	0.3716	0.816	0.47	0.06484	2.602	0.15	0.001243	1.118	0.3	0.1087	1.062	0.45	0.1888	1.021	0.34	1.07	0.734	1.019	0.507	1.323	0.232	1.047	0.31	0.782	0.588
							exm667511	rs77358162	388.061	0.002	TPK1	NS	1.15	0.59	0.00311465	1.748	0.31	0.00233	1.036	0.98	0.002481	NA	NA	0	0.547	0.47	0.002304	1.121	0.73	0.008621	1.15	0.594	1.15	0.594	1.173	0.617	1.173	0.617	2.704	0.013	2.704	0.013
rs9693444	8	29509616	22	5	0	0	exm693567	rs16876563	480.459	NA	MBOAT4	NS	1.173	0.09	0.0345924	1.205	0.055	0.1179	<<	0.55	0.001241	NA	NA	0	1.161	0.76	0.004224	1.045	0.95	0.001189	1.004	0.922	0.868	0.358	0.939	0.223	0.913	0.647	1.003	0.973	1.087	0.764
							exm693392	NA	-470.126	NA	KIF13B	NS	>>	0.18	0	NA	NA	0	NA	NA	0	NA	NA	0	NA	NA	0	>>	0.18	0	0.94	0.482	0.976	0.822	0.907	0.38	0.873	0.334	0.991	0.959	1.103	0.645
							exm693514	NA	417.742	NA	TMEM66	NS	3.792	0.31	6.62691e-05	3.55	0.34	0.000233	NA	NA	0	NA	NA	0	NA	NA	0	NA	NA	0	1.03	0.878	1.03	0.878	0.998	0.995	0.998	0.995	1.35	0.366	1.35	0.366
							exm693575	rs77053651	485.307	NA	LEPROTL1	NS	1.136	0.35	0.0151756	1.167	0.28	0.05126	>>	0.16	0	>>	0.84	0	0.759	0.68	0.003072	<<	0.52	0.0002973	1.028	0.657	NA	NA	0.977	0.784	NA	NA	1.092	0.445	NA	NA
							exm693455	rs147487823	-306.657	NA	DUSP4	ST	<<	0.4	0.000132538	<<	0.43	0.000466	NA	NA	0	NA	NA	0	NA	NA	0	NA	NA	0	0.863	0.718	0.863	0.718	0.797	0.675	0.797	0.675	1.077	0.921	1.077	0.921
rs6472903	8	76230301	17	3	0	0	exm2176412	NA	-301.447	NA	CRISPLD1	NS	0.25	0.045	0.00119284	NA	NA	0	0.65	0.71	0.003722	0.151	0.036	0.003728	NA	NA	0	NA	NA	0	0.912	0.633	0.912	0.633	0.84	0.481	0.84	0.481	1.203	0.643	1.203	0.643
							exm706494	rs144221690	-472.909	0.001	PI15	NS	7.69	0.053	6.62691e-05	4.487	0.25	0.000233	NA	NA	0	NA	NA	0	>>	0.14	0	NA	NA	0	0.971	0.892	0.971	0.892	1.14	0.615	1.14	0.615	0.574	0.339	0.574	0.339
							exm706586	rs2943549	222.012	0.004	HNF4G	NS	0.981	0.58	0.370775	0.97	0.78	0.1319	1.059	0.65	0.5261	0.968	0.6	0.4456	0.984	0.82	0.5319	0.983	0.79	0.4242	0.993	0.686	0.971	0.934	0.983	0.418	0.554	0.32	1.049	0.227	2.394	0.0426
rs2943559	8	76417937	11	2	5	1	exm2176412	NA	-489.083	NA	CRISPLD1	NS	0.25	0.045	0.00119284	NA	NA	0	0.65	0.71	0.003722	0.151	0.036	0.003728	NA	NA	0	NA	NA	0	0.912	0.633	0.912	0.633	0.84	0.481	0.84	0.481	1.203	0.643	1.203	0.643
							exm706586	rs2943549	34.376	0.043475	HNF4G	NS	0.981	0.58	0.370775	0.97	0.78	0.1319	1.059	0.65	0.5261	0.968	0.6	0.4456	0.984	0.82	0.5319	0.983	0.79	0.4242	0.993	0.686	0.971	0.934	0.983	0.418	0.554	0.32	1.049	0.227	2.394	0.0426
rs13281615	8	128355618	6	1	0	0	exm720616	rs139697494	397.127	NA	MYC	NS	<<	0.21	0.000198807	NA	NA	0	NA	NA	0	NA	NA	0	<<	0.33	0.000768	<<	0.52	0.0002973	1	0.998	1.035	0.832	1.056	0.644	1.332	0.129	0.903	0.634	0.587	0.198
rs11780156	8	129194641	6	1	0	0	exm720616	rs139697494	-441.896	NA	MYC	NS	<<	0.21	0.000198807	NA	NA	0	NA	NA	0	NA	NA	0	<<	0.33	0.000768	<<	0.52	0.0002973	1	0.998	1.035	0.832	1.056	0.644	1.332	0.129	0.903	0.634	0.587	0.198
rs1011970	9	22062134	17	4	4	2	exm743684	rs150007803	389.552	NA	DMRTA1	NS	>>	0.049	0	>>	0.071	0	NA	NA	0	NA	NA	0	NA	NA	0	NA	NA	0	1.077	0.462	1.077	0.462	1.07	0.6	1.07	0.6	1	0.998	1	0.998
							exm743602	NA	-53.404	NA	CDKN2B	NS	<<	0.087	0.00072896	<<	0.092	0.002563	NA	NA	0	NA	NA	0	NA	NA	0	NA	NA	0	<<	0.0866	<<	0.0866	<<	0.227	<<	0.227	<<	0.401	<<	0.401
							exm743529	rs3731249	-91.218	0.064	CDKN2A	NS	0.917	0.5	0.014049	1.022	0.96	0.006757	3.054	0.078	0.004963	6.377	0.082	0.0002485	0.924	0.74	0.02343	0.779	0.17	0.03478	0.932	0.55	1.002	0.993	0.895	0.454	0.762	0.476	1.266	0.298	0.518	0.355
							exm2193552	rs147028761	-207.395	NA	MTAP	NS	1.248	0.74	0.000596896	1.361	0.65	0.002098	NA	NA	0	NA	NA	0	NA	NA	0	NA	NA	0	0.996	0.904	1.248	0.741	0.96	0.298	2.396	0.18	1.206	0.00742	<<	0.465
rs10759243	9	110306115	7	2	5	1	exm769847	rs111972101	-237.313	NA	RAD23B	NS	<<	0.29	0.000198833	<<	0.45	0.000466	NA	NA	0	NA	NA	0	NA	NA	0	<<	0.46	0.0002973	<<	0.15	<<	0.15	<<	0.281	<<	0.281	<<	0.541	<<	0.541
							exm769912	rs139364854	-56.525	NA	KLF4	NS	1.751	0.54	0.000198807	1.587	0.71	0.000466	NA	NA	0	NA	NA	0	<<	0.42	0.000384	>>	0.23	0	0.999	0.997	0.999	0.997	0.741	0.409	0.741	0.409	2.026	0.0795	2.026	0.0795
rs865686	9	110888478	0	0	0	0	NA	NA	NA	NA	NA	NA	NA	NA	NA	NA	NA	NA	NA	NA	NA	NA	NA	NA	NA	NA	NA	NA	NA	NA	NA	NA	NA	NA	NA	NA	NA	NA	NA	NA	NA	NA
rs2380205	10	5886734	160	13	62	4	exm807338	rs61731328	-104.424	0.009	C10orf18	NS	2.344	0.01	0.00119284	2.157	0.29	0.001165	NA	NA	0	NA	NA	0	2.755	0.12	0.001536	2.263	0.08	0.002675	1.003	0.791	1.055	0.26	0.995	0.68	1.039	0.528	0.994	0.819	0.972	0.794
							exm807157	rs75808734	-319.487	NA	CALML3	NS	0.25	0.042	0.00172826	0.25	0.042	0.00608	NA	NA	0	NA	NA	0	NA	NA	0	NA	NA	0	0.953	0.701	0.25	0.0422	1.003	0.987	0.229	0.116	0.831	0.538	<<	0.159
							exm806941	rs149030047	-451.051	0.001	TUBAL3	NS	>>	0.058	0	>>	0.043	0	NA	NA	0	NA	NA	0	NA	NA	0	NA	NA	0	0.922	0.158	0.878	0.178	0.933	0.336	0.9	0.385	0.915	0.498	0.923	0.704
							exm807114	rs142260154	-387.878	NA	NET1	NS	4.519	0.071	0.000132556	4.01	0.29	0.000233	NA	NA	0	NA	NA	0	NA	NA	0	6.711	0.075	0.0002973	0.977	0.742	1.056	0.647	0.945	0.532	1.023	0.876	1.205	0.219	1.458	0.0988
							exm807135	rs144222183	-345.457	0.001	CALML5	NS	1.736	0.076	0.00165673	3.328	0.079	0.000932	NA	NA	0	NA	NA	0	NA	NA	0	1.445	0.29	0.006243	1.02	0.562	0.948	0.794	1.038	0.382	1.02	0.936	0.799	0.00593	0.991	0.981
							exm806894	rs143074510	-470.936	0.002	UCN3	NS	2.384	0.11	0.000397614	NA	NA	0	0.912	0.92	0.004963	10.57	0.0091	0.0002485	>>	0.47	0	<<	0.59	0.0002973	1.004	0.902	1.116	0.721	1.012	0.763	1.379	0.371	1.072	0.329	0.76	0.708
							exm807628	rs138654100	33.461	NA	ANKRD16	NS	5.479	0.12	6.62691e-05	2.917	0.43	0.000233	NA	NA	0	NA	NA	0	NA	NA	0	>>	0.21	0	1.004	0.883	0.991	0.958	1.031	0.419	1.007	0.976	0.929	0.273	0.993	0.983
							exm807894	rs148133619	119.065	NA	IL15RA	NS	3.733	0.12	0.000132556	NA	NA	0	NA	NA	0	NA	NA	0	NA	NA	0	3.718	0.13	0.0005945	1.033	0.29	1.081	0.601	1.03	0.432	1.147	0.451	1.041	0.563	1.101	0.78
							exm807585	rs146005160	-76.393	NA	GDI2	NS	2.4	0.13	0.000463883	2.218	0.21	0.001398	NA	NA	0	NA	NA	0	NA	NA	0	2.191	0.58	0.0002973	1.01	0.977	1.01	0.977	1.593	0.213	1.593	0.213	<<	0.135	<<	0.135
							exm807197	NA	-202.825	NA	ASB13	NS	>>	0.18	0	NA	NA	0	NA	NA	0	NA	NA	0	NA	NA	0	>>	0.23	0	0.941	0.679	0.941	0.679	0.787	0.236	0.787	0.236	1.128	0.659	1.128	0.659
							exm808024	rs142603218	368.89	NA	PFKFB3	NS	<<	0.23	0.000265076	<<	0.33	0.000699	NA	NA	0	NA	NA	0	<<	0.51	0.000384	NA	NA	0	0.798	0.421	0.798	0.421	0.907	0.771	0.907	0.771	0.928	0.901	0.928	0.901
							exm807817	NA	78.886	NA	FBXO18	NS	<<	0.34	0.000132556	NA	NA	0	NA	NA	0	NA	NA	0	NA	NA	0	<<	0.35	0.0005945	0.951	0.789	0.951	0.789	1.04	0.864	1.04	0.864	1.018	0.964	1.018	0.964
							exm807955	rs72650666	179.568	0.003	IL2RA	NS	0.498	0.36	0.000596422	NA	NA	0	>>	0.17	0	NA	NA	0	<<	0.27	0.001152	0.358	0.32	0.001784	0.705	0.422	0.705	0.422	0.707	0.525	0.707	0.525	1.868	0.311	1.868	0.311
rs7072776	10	22032942	27	5	9	2	exm813949	rs145605101	-17.736	NA	MLLT10	NS	2.971	0.02	0.0005965	3.138	0.022	0.001864	NA	NA	0	NA	NA	0	1.825	0.67	0.0003843	NA	NA	0	1.151	0.523	1.151	0.523	0.84	0.569	0.84	0.569	1.154	0.761	1.154	0.761
							exm814060	rs149825372	176.943	NA	DNAJC1	NS	2.388	0.042	0.000662691	NA	NA	0	2.132	0.59	0.001241	>>	0.21	0	2.724	0.12	0.001536	1.841	0.36	0.001486	2.231	0.00817	2.231	0.00817	2.019	0.063	2.019	0.063	0.709	0.737	0.709	0.737
							exm813749	rs143363975	-248.295	0.000267	C10orf114	NS	1.407	0.054	0.00583168	1.193	0.76	0.002796	2.536	0.51	0.001241	3.031	0.36	0.0002485	1.454	0.23	0.01037	1.367	0.2	0.01397	1.354	0.0454	1.354	0.0454	1.437	0.045	1.437	0.045	0.914	0.808	0.914	0.808
							exm813792	NA	-227.946	NA	C10orf140	NS	2.489	0.055	0.00072896	2.198	0.12	0.002563	NA	NA	0	>>	0.089	0	NA	NA	0	NA	NA	0	1.026	0.902	1.026	0.902	1.021	0.938	1.021	0.938	0.978	0.963	0.978	0.963
							exm814073	rs2243897	465.267	NA	EBLN1	NS	1.045	0.21	0.300875	1.022	0.75	0.4867	1.078	0.56	0.294	1.056	0.51	0.1481	1.031	0.69	0.2803	1.05	0.49	0.2643	1.021	0.26	NA	NA	1.012	0.596	NA	NA	1.011	0.8	NA	NA
rs11814448	10	22315843	25	5	0	0	exm813949	rs145605101	-300.637	NA	MLLT10	NS	2.971	0.02	0.0005965	3.138	0.022	0.001864	NA	NA	0	NA	NA	0	1.825	0.67	0.0003843	NA	NA	0	1.151	0.523	1.151	0.523	0.84	0.569	0.84	0.569	1.154	0.761	1.154	0.761
							exm814060	rs149825372	-105.958	NA	DNAJC1	NS	2.388	0.042	0.000662691	NA	NA	0	2.132	0.59	0.001241	>>	0.21	0	2.724	0.12	0.001536	1.841	0.36	0.001486	2.231	0.00817	2.231	0.00817	2.019	0.063	2.019	0.063	0.709	0.737	0.709	0.737
							exm814202	rs145098244	364.944	NA	SPAG6	NS	>>	0.071	0	>>	0.068	0	NA	NA	0	NA	NA	0	NA	NA	0	NA	NA	0	0.925	0.157	0.867	0.482	0.865	0.0412	0.93	0.773	0.97	0.781	0.525	0.265
							exm814073	rs2243897	182.366	NA	EBLN1	NS	1.045	0.21	0.300875	1.022	0.75	0.4867	1.078	0.56	0.294	1.056	0.51	0.1481	1.031	0.69	0.2803	1.05	0.49	0.2643	1.021	0.26	NA	NA	1.012	0.596	NA	NA	1.011	0.8	NA	NA
							exm814114	rs148388360	292.058	NA	COMMD3-BMI1	NS	<<	0.26	0.000331345	<<	0.27	0.001165	NA	NA	0	NA	NA	0	NA	NA	0	NA	NA	0	1.014	0.815	0.647	0.388	0.956	0.551	0.915	0.873	1.154	0.208	<<	0.316
rs10995190	10	64278682	49	5	1	1	exm827491	rs143267694	-320.902	NA	RTKN2	NS	>>	0.0062	0	>>	0.075	0	NA	NA	0	NA	NA	0	NA	NA	0	>>	0.059	0	1.016	0.537	1.253	0.265	1.042	0.189	1.398	0.165	1.032	0.592	1.457	0.38
							exm827666	rs116590827	136.547	NA	ZNF365	NS	1.657	0.0082	0.00622929	1.695	0.0069	0.0212	NA	NA	0	NA	NA	0	0.826	0.87	0.001152	>>	0.16	0	0.985	0.577	1.097	0.265	0.978	0.505	1.214	0.0623	0.891	0.0576	1.002	0.991
							exm827401	rs140096631	-433.099	NA	ARID5B	NS	>>	0.027	0	NA	NA	0	NA	NA	0	NA	NA	0	NA	NA	0	>>	0.025	0	0.93	0.565	0.93	0.565	0.901	0.528	0.901	0.528	1.106	0.662	1.106	0.662
							exm827753	rs147604283	295.274	NA	EGR2	NS	>>	0.03	0	>>	0.05	0	NA	NA	0	NA	NA	0	NA	NA	0	NA	NA	0	3.657	0.0735	3.657	0.0735	<<	0.458	<<	0.458	32.272	1.24e-11	32.272	1.24e-11
							exm827716	NA	286.673	NA	ADO	NS	0.386	0.2	0.000729056	<<	0.31	0.0009324	0.555	0.47	0.007444	NA	NA	0	<<	0.48	0.000384	NA	NA	0	1.001	0.962	0.386	0.204	0.993	0.749	0.703	0.649	1.051	0.243	<<	0.408
rs704010	10	80841148	15	4	0	0	exm836998	rs146374216	217.188	NA	ZMIZ1	SP	<<	0.12	0.000331345	<<	0.62	0.000233	<<	0.45	0.001241	NA	NA	0	<<	0.51	0.000384	<<	0.24	0.0005945	0.855	0.719	0.855	0.719	1.246	0.63	1.246	0.63	<<	0.258	<<	0.258
							exm837127	rs147377368	272.367	NA	PPIF	NS	0.245	0.14	0.000861498	0.32	0.25	0.002563	NA	NA	0	NA	NA	0	NA	NA	0	<<	0.36	0.0005945	0.946	0.852	0.946	0.852	1.061	0.867	1.061	0.867	0.904	0.89	0.904	0.89
							exm837142	rs140605224	305.011	NA	ZCCHC24	NS	<<	0.41	0.000132538	<<	0.65	0.000233	NA	NA	0	NA	NA	0	NA	NA	0	<<	0.5	0.0002973	1.141	0.827	1.141	0.827	2.064	0.222	2.064	0.222	<<	0.433	<<	0.433
							exm837232	rs147533125	477.532	0.002	SFTPA2	NS	1.016	0.95	0.00503645	0.918	0.75	0.01608	>>	0.12	0	<<	0.41	0.0002485	>>	0.51	0	1.382	0.62	0.001784	1.016	0.947	1.016	0.947	0.924	0.801	0.924	0.801	0.833	0.724	0.833	0.724
rs7904519	10	114773927	13	2	3	1	exm856354	rs147841431	151.748	NA	TCF7L2	NS	1.322	0.085	0.00974155	1.317	0.11	0.03192	<<	0.23	0.002481	>>	0.65	0	1.596	0.43	0.002688	2.368	0.54	0.0002973	0.995	0.921	1.179	0.155	1.079	0.235	1.225	0.154	0.752	0.0386	0.808	0.453
							exm856232	rs151163330	-475.894	NA	VTI1A	NS	<<	0.3	0.000265076	<<	0.31	0.000932	NA	NA	0	NA	NA	0	NA	NA	0	NA	NA	0	0.891	0.376	0.517	0.225	0.837	0.285	0.226	0.114	0.628	0.175	<<	0.298
rs11199914	10	123093901	24	3	0	0	exm860524	rs61761620	-444.418	0.001	WDR11	NS	0.175	0.057	0.000861498	<<	0.28	0.000699	NA	NA	0	NA	NA	0	1.551	0.76	0.000384	<<	0.054	0.002675	0.794	0.234	0.794	0.234	0.858	0.522	0.858	0.522	0.789	0.571	0.789	0.571
							exm860736	rs137975321	409.371	NA	ATE1	NS	5.078	0.15	6.62691e-05	3.4	0.36	0.000233	NA	NA	0	NA	NA	0	>>	0.54	0	NA	NA	0	1.059	0.742	1.059	0.742	1.03	0.889	1.03	0.889	0.879	0.763	0.879	0.763
							exm860642	rs141929882	162.234	NA	FGFR2	NS	4.43	0.19	6.62691e-05	NA	NA	0	NA	NA	0	NA	NA	0	4.233	0.2	0.000384	NA	NA	0	1.072	0.197	1.147	0.594	1.133	0.0665	1.235	0.503	1.018	0.877	0.927	0.899
rs2981579	10	123337335	21	3	8	1	exm860842	rs139294636	393.119	0.005	NSMCE4A	SP	0.347	0.041	0.00165673	<<	0.23	0.000932	0.975	0.98	0.002481	NA	NA	0	0.406	0.4	0.00192	0.299	0.092	0.004162	0.949	0.605	0.636	0.0988	0.961	0.756	0.513	0.0728	1.298	0.168	1.676	0.232
							exm860736	rs137975321	165.937	NA	ATE1	NS	5.078	0.15	6.62691e-05	3.4	0.36	0.000233	NA	NA	0	NA	NA	0	>>	0.54	0	NA	NA	0	1.059	0.742	1.059	0.742	1.03	0.889	1.03	0.889	0.879	0.763	0.879	0.763
							exm860642	rs141929882	-81.2	NA	FGFR2	NS	4.43	0.19	6.62691e-05	NA	NA	0	NA	NA	0	NA	NA	0	4.233	0.2	0.000384	NA	NA	0	1.072	0.197	1.147	0.594	1.133	0.0665	1.235	0.503	1.018	0.877	0.927	0.899
rs3817198	11	1909006	92	18	40	5	exm878082	rs10770125	260.008	0	INS-IGF2	NS	0.882	0.00011	0.425305	1.011	0.9	0.2109	0.827	0.14	0.3933	0.914	0.14	0.5171	0.872	0.052	0.5714	0.798	0.00037	0.4836	0.884	0.000124	0.933	0.784	0.877	0.000975	0.837	0.584	0.87	0.0628	1.156	0.8
							exm877740	NA	-3.833	NA	LSP1	NS	7.181	0.0051	0.000132538	NA	NA	0	NA	NA	0	NA	NA	0	7.226	0.0054	0.000768	NA	NA	0	1.021	0.649	1.098	0.638	1.007	0.908	1.002	0.995	1.014	0.893	0.909	0.826
							exm878237	rs147416823	283.921	NA	TH	SP	>>	0.011	0	>>	0.012	0	NA	NA	0	NA	NA	0	NA	NA	0	NA	NA	0	1.432	0.0926	1.432	0.0926	1.336	0.284	1.336	0.284	2.657	0.00386	2.657	0.00386
							exm877581	rs140659236	-51.492	0.003	SYT8	SP	0.603	0.029	0.00583168	0.634	0.47	0.003728	0.712	0.77	0.003722	NA	NA	0	0.903	0.78	0.009601	0.407	0.017	0.01308	0.978	0.456	0.928	0.438	1.033	0.373	0.926	0.52	0.973	0.671	0.985	0.942
							exm877454	rs147278302	-133.654	0.003	CTSD	NS	0.525	0.054	0.00304918	0.832	0.87	0.0009328	<<	0.17	0.004963	<<	0.2	0.000497	0.291	0.083	0.00576	0.817	0.63	0.006243	0.976	0.721	0.678	0.0392	0.932	0.418	0.573	0.0251	1.231	0.144	0.978	0.954
							exm1706282	rs140477675	430.105	NA	TSPAN32	NS	>>	0.067	0	>>	0.051	0	NA	NA	0	NA	NA	0	NA	NA	0	NA	NA	0	0.946	0.505	0.982	0.869	0.995	0.96	1.098	0.482	1.098	0.612	1.167	0.481
							exm878042	rs149483638	252.524	NA	IGF2	SP	0.841	0.068	0.0309517	0.776	0.75	0.00233	<<	0.024	0.01241	0.839	0.49	0.01541	0.835	0.094	0.1422	1.372	0.46	0.004459	0.874	0.11	1.005	0.977	0.807	0.0504	1.002	0.993	0.834	0.305	0.646	0.299
							exm876879	NA	-441.98	NA	BRSK2	NS	5.138	0.15	6.62691e-05	>>	0.076	0	NA	NA	0	NA	NA	0	>>	0.17	0	<<	0.62	0.0002973	1.013	0.954	1.013	0.954	0.863	0.619	0.863	0.619	1.701	0.178	1.701	0.178
							exm877928	rs12812	68.546	0.024	MRPL23	NS	0.937	0.15	0.133466	0.938	0.68	0.05033	1.052	0.8	0.103	0.986	0.86	0.163	0.97	0.72	0.202	0.845	0.055	0.1584	0.952	0.195	1.985	0.213	0.974	0.575	2.397	0.154	0.967	0.699	5.98	0.0147
							exm878106	rs144093133	272.185	NA	INS	NS	2.303	0.19	0.000397614	2.318	0.18	0.001398	NA	NA	0	NA	NA	0	NA	NA	0	NA	NA	0	1.737	0.233	1.737	0.233	3.308	0.00727	3.308	0.00727	<<	0.319	<<	0.319
							exm877654	NA	-47.245	NA	TNNI2	NS	>>	0.19	0	NA	NA	0	NA	NA	0	NA	NA	0	NA	NA	0	>>	0.17	0	>>	0.19	>>	0.19	>>	0.0988	>>	0.0988	NA	NA	NA	NA
							exm878264	rs74048215	412.823	NA	C11orf21	ST	0.853	0.32	0.0139828	0.761	0.11	0.04753	>>	0.16	0	NA	NA	0	1.784	0.31	0.002688	>>	0.034	0	0.99	0.787	1.167	0.411	0.98	0.664	1.472	0.0647	1.088	0.306	0.72	0.516
							exm877407	rs146098833	-190.292	NA	KRTAP5-6	NS	<<	0.33	0.000132538	NA	NA	0	NA	NA	0	NA	NA	0	NA	NA	0	<<	0.3	0.0005945	0.672	0.722	0.672	0.722	<<	0.359	<<	0.359	<<	0.623	<<	0.623
							exm877019	rs1881503	-401.275	0	MOB2	NS	0.951	0.47	0.0530815	1.103	0.62	0.02796	1.628	0.13	0.03598	1.535	0.64	0.0007455	0.992	0.94	0.0937	0.851	0.1	0.1204	0.95	0.425	0.848	0.568	0.897	0.178	1.062	0.857	0.965	0.8	0.812	0.73
							exm877384	NA	-257.24	NA	KRTAP5-5	NS	<<	0.47	6.62691e-05	NA	NA	0	NA	NA	0	NA	NA	0	NA	NA	0	<<	0.42	0.0002973	<<	0.468	<<	0.468	<<	0.572	<<	0.572	<<	0.785	<<	0.785
							exm877844	rs144957238	46.194	NA	TNNT3	NS	<<	0.49	6.62691e-05	NA	NA	0	NA	NA	0	NA	NA	0	NA	NA	0	<<	0.47	0.0002973	<<	0.486	<<	0.486	<<	0.589	<<	0.589	<<	0.803	<<	0.803
							exm877423	rs190833491	-139.921	0	IFITM10	NS	0.855	0.51	0.0045063	0.629	0.55	0.002563	<<	0.48	0.001241	NA	NA	0	0.416	0.068	0.009217	1.286	0.4	0.009512	0.855	0.511	0.855	0.511	0.9	0.716	0.9	0.716	0.927	0.885	0.927	0.885
							exm877274	rs7129160	-279.313	0	KRTAP5-3	SP	0.989	0.84	0.08612	1.137	0.29	0.07346	1.056	0.75	0.1352	0.849	0.1	0.1056	1.134	0.38	0.06221	0.94	0.58	0.08577	0.989	0.836	NA	NA	1.034	0.619	NA	NA	0.841	0.202	NA	NA
rs3903072	11	65583066	288	34	68	9	exm928470	rs116206676	64.671	NA	CTSW	NS	10.45	0.00042	0.000132538	11.661	0.00017	0.000466	NA	NA	0	NA	NA	0	NA	NA	0	NA	NA	0	1.018	0.809	1.268	0.0989	0.914	0.351	1.2	0.324	1.217	0.154	1.134	0.689
							exm929694	NA	472.029	NA	YIF1A	NS	15.215	0.0011	6.62691e-05	<<	0.58	0.000233	NA	NA	0	NA	NA	0	>>	0.002	0	>>	0.17	0	1.024	0.809	1.084	0.622	0.886	0.34	1.089	0.681	1.02	0.927	1.264	0.475
							exm1729475	rs188442678	-174.192	NA	SIPA1	NS	0.308	0.0044	0.00304838	<<	0.64	0.000233	>>	0.2	0	0.254	0.0021	0.01093	NA	NA	0	<<	0.61	0.0002973	0.764	0.0004	0.543	0.00053	0.705	0.000483	0.44	0.000876	0.967	0.83	0.848	0.613
							exm926696	NA	-279.461	NA	SCYL1	NS	<<	0.0054	0.00132538	<<	0.61	0.000233	NA	NA	0	<<	0.0066	0.004722	NA	NA	0	NA	NA	0	1.024	0.853	1.024	0.853	0.906	0.559	0.906	0.559	1.031	0.913	1.031	0.913
							exm928787	rs117506262	132.137	0.003	TSGA10IP	ST	0.182	0.0087	0.001723	<<	0.29	0.000932	NA	NA	0	NA	NA	0	0.414	0.24	0.00384	<<	0.031	0.003567	0.977	0.302	0.687	0.0324	0.96	0.141	0.457	0.00315	0.979	0.665	1.191	0.538
							exm928861	rs149700997	150.17	NA	SART1	NS	10.739	0.011	6.62691e-05	12.111	0.0063	0.000233	NA	NA	0	NA	NA	0	NA	NA	0	NA	NA	0	0.894	0.422	0.894	0.422	0.929	0.672	0.929	0.672	0.996	0.989	0.996	0.989
							exm929237	rs35285455	227.546	0.015	GAL3ST3	NS	1.395	0.015	0.0110065	1.028	0.9	0.02123	2.21	0.34	0.003722	1.409	0.82	0.0002485	2.021	0.013	0.009992	1.401	0.16	0.01338	1.395	0.00833	1.407	0.295	1.478	0.00999	1.425	0.363	1.155	0.612	0.888	0.908
							exm927296	NA	-202.197	NA	MAP3K11	NS	>>	0.024	0	>>	0.022	0	NA	NA	0	NA	NA	0	NA	NA	0	NA	NA	0	0.943	0.624	0.943	0.624	0.943	0.698	0.943	0.698	0.9	0.706	0.9	0.706
							exm928393	rs148410446	52.74	NA	EFEMP2	NS	>>	0.05	0	NA	NA	0	>>	0.17	0	NA	NA	0	NA	NA	0	>>	0.15	0	1.037	0.6	0.627	0.211	0.966	0.705	0.611	0.302	1.073	0.605	0.446	0.416
							exm925997	rs143788676	-494.558	NA	CDC42EP2	NS	>>	0.051	0	NA	NA	0	NA	NA	0	NA	NA	0	>>	0.13	0	>>	0.19	0	0.916	0.615	0.916	0.615	0.803	0.357	0.803	0.357	0.861	0.672	0.861	0.672
							exm927333	NA	-199.154	NA	PCNXL3	NS	>>	0.054	0	NA	NA	0	NA	NA	0	NA	NA	0	NA	NA	0	>>	0.072	0	1.034	0.328	0.95	0.583	1.022	0.616	0.921	0.491	1.115	0.144	1.151	0.435
							exm928085	NA	-35.754	NA	DKFZp761E198	NS	<<	0.073	0.000662691	<<	0.17	0.001631	NA	NA	0	NA	NA	0	<<	0.31	0.001152	NA	NA	0	0.961	0.229	0.908	0.587	0.978	0.591	0.896	0.625	0.992	0.917	0.919	0.831
							exm926249	rs139960411	-415.834	NA	FRMD8	NS	2.971	0.094	0.000331345	3.073	0.084	0.001165	NA	NA	0	NA	NA	0	NA	NA	0	NA	NA	0	1.629	0.198	1.629	0.198	2.005	0.0914	2.005	0.0914	1.063	0.954	1.063	0.954
							exm928347	rs115472389	49.01	NA	MUS81	NS	0.781	0.095	0.0175613	0.769	0.092	0.05895	NA	NA	0	NA	NA	0	0.788	0.7	0.003456	0.582	0.65	0.0008918	0.996	0.797	1.21	0.0755	1.001	0.978	1.305	0.0364	0.954	0.19	1.239	0.393
							exm926753	rs150273175	-276.018	NA	LTBP3	NS	0.32	0.1	0.00145792	0.32	0.11	0.005126	NA	NA	0	NA	NA	0	NA	NA	0	NA	NA	0	1.036	0.503	0.643	0.0711	0.966	0.61	0.72	0.275	1.091	0.478	0.382	0.164
							exm929584	rs2276036	450.364	0.007	KLC2	NS	1.065	0.1	0.19715	1.084	0.33	0.1934	0.996	0.98	0.2233	1.028	0.69	0.2555	1.305	0.0051	0.1336	0.967	0.69	0.1751	1.064	0.104	1.037	0.889	1.04	0.409	1.117	0.726	1.056	0.534	1.799	0.258
							exm929315	rs140538228	242.459	NA	SF3B2	SP	<<	0.13	0.000331345	NA	NA	0	NA	NA	0	NA	NA	0	<<	0.51	0.000384	<<	0.17	0.001189	0.877	0.557	0.877	0.557	0.66	0.181	0.66	0.181	0.907	0.85	0.907	0.85
							exm927948	rs148186114	-95.297	NA	RNASEH2C	NS	<<	0.13	0.000331433	<<	0.57	0.000233	NA	NA	0	NA	NA	0	<<	0.34	0.0007686	<<	0.31	0.0005949	1.098	0.253	0.992	0.976	0.991	0.933	1.189	0.588	0.926	0.731	<<	0.0764
							exm928584	rs146124046	69.57	NA	FIBP	NS	<<	0.14	0.000331345	<<	0.55	0.000233	NA	NA	0	NA	NA	0	NA	NA	0	<<	0.2	0.001189	0.92	0.499	0.604	0.0983	0.914	0.561	0.787	0.507	1.08	0.789	0.433	0.235
							exm926965	NA	-236.22	NA	EHBP1L1	NS	<<	0.14	0.000331389	NA	NA	0	NA	NA	0	NA	NA	0	<<	0.24	0.001152	<<	0.35	0.0005945	0.998	0.931	0.967	0.8	0.956	0.194	1.032	0.849	1.088	0.155	1.126	0.626
							exm929398	rs142653069	395.641	NA	PACS1	NS	4.937	0.15	6.62691e-05	NA	NA	0	NA	NA	0	NA	NA	0	NA	NA	0	5.529	0.12	0.0002973	0.9	0.696	0.9	0.696	0.932	0.838	0.932	0.838	1.039	0.941	1.039	0.941
							exm929783	rs141194977	499.362	NA	CD248	NS	1.369	0.18	0.0047051	1.355	0.21	0.01584	NA	NA	0	NA	NA	0	2.292	0.3	0.001152	NA	NA	0	1.125	0.132	1.125	0.132	1.154	0.146	1.154	0.146	0.933	0.691	0.933	0.691
							exm926108	rs61978625	-459.312	0	TIGD3	NS	0.831	0.18	0.0142478	0.656	0.28	0.01002	0.647	0.6	0.007444	NA	NA	0	1.06	0.82	0.01882	0.793	0.21	0.03478	0.962	0.472	1.473	0.548	1.028	0.686	1.922	0.35	0.746	0.0161	<<	0.567
							exm927149	rs149170823	-222.141	NA	KCNK7	NS	0.383	0.2	0.000795229	<<	0.51	0.000466	NA	NA	0	NA	NA	0	0.457	0.31	0.003456	<<	0.49	0.0002973	1.05	0.647	0.894	0.658	1.044	0.75	1.167	0.596	0.815	0.464	0.232	0.115
							exm929168	rs142151431	210.277	NA	CATSPER1	NS	2.376	0.2	0.000331345	2.869	0.23	0.000699	NA	NA	0	NA	NA	0	2.249	0.41	0.000768	NA	NA	0	0.969	0.216	0.964	0.743	0.97	0.343	0.933	0.631	0.903	0.0913	0.558	0.0827
							exm926185	rs74531249	-435.693	NA	SLC25A45	NS	1.398	0.21	0.00337972	1.412	0.21	0.01188	NA	NA	0	NA	NA	0	>>	0.82	0	NA	NA	0	1.053	0.356	0.969	0.771	1.034	0.647	0.935	0.642	1.111	0.353	1.128	0.576
							exm927776	NA	-161.174	NA	RELA	NS	<<	0.29	0.000198807	NA	NA	0	NA	NA	0	NA	NA	0	NA	NA	0	<<	0.3	0.0008918	1.16	0.602	1.16	0.602	1.369	0.335	1.369	0.335	0.457	0.43	0.457	0.43
							exm928233	rs138424932	37.302	NA	SNX32	NS	2.233	0.32	0.000198807	>>	0.04	0	NA	NA	0	0.988	0.99	0.000497	NA	NA	0	1.624	0.73	0.0002973	1.084	0.76	1.084	0.76	0.832	0.627	0.832	0.627	1.623	0.29	1.623	0.29
							exm928149	rs142294960	-20.373	NA	OVOL1	NS	2.11	0.41	0.000198807	1.297	0.82	0.000699	NA	NA	0	NA	NA	0	NA	NA	0	>>	0.19	0	1.044	0.855	1.044	0.855	1.067	0.819	1.067	0.819	1.611	0.271	1.611	0.271
							exm928689	rs7947504	102.159	0.005	C11orf68	NS	0.947	0.42	0.0925116	0.891	0.13	0.2915	0.949	0.94	0.007444	4.243	0.19	0.0002485	1.167	0.4	0.03418	1.094	0.71	0.01457	0.963	0.513	1.025	0.883	0.962	0.606	1.032	0.885	1.003	0.979	0.903	0.769
							exm926913	rs35971725	-244.949	0.001	SSSCA1	NS	0.878	0.46	0.0110669	0.877	0.48	0.03751	1.743	0.72	0.001241	NA	NA	0	0.339	0.4	0.001152	0.619	0.72	0.0005945	0.867	0.413	0.867	0.413	0.823	0.402	0.823	0.402	1.183	0.575	1.183	0.575
							exm929756	rs139685357	479.48	0.008	TMEM151A	NS	0.713	0.51	0.00106045	1.28	0.83	0.0006993	NA	NA	0	NA	NA	0	0.571	0.63	0.001152	0.629	0.48	0.002973	0.713	0.512	0.713	0.512	1.238	0.681	1.238	0.681	<<	0.273	<<	0.273
							exm929009	rs35497370	184.512	NA	EIF1AD	NS	1.214	0.52	0.00284957	1.091	0.8	0.008854	NA	NA	0	NA	NA	0	2.372	0.28	0.001152	1.232	0.87	0.0005945	0.966	0.559	1.018	0.924	0.98	0.786	1.095	0.704	1.135	0.329	1.287	0.448
							exm928654	rs144760068	77.534	NA	FOSL1	NS	0.998	0.99	0.00357853	1.094	0.76	0.01212	NA	NA	0	NA	NA	0	<<	0.38	0.000768	NA	NA	0	0.998	0.994	0.998	0.994	1.126	0.744	1.126	0.744	0.565	0.426	0.565	0.426
rs614367	11	69328764	47	7	0	0	exm936063	rs144905179	-475.567	NA	TPCN2	NS	11.832	0.0038	6.62691e-05	NA	NA	0	NA	NA	0	NA	NA	0	NA	NA	0	12.041	0.0037	0.0002973	1.028	0.522	0.898	0.407	1.032	0.563	0.778	0.147	1.112	0.249	0.961	0.89
							exm936235	rs150074947	259.411	0	FGF4	NS	2.84	0.032	0.000530152	3.298	0.079	0.000932	NA	NA	0	NA	NA	0	NA	NA	0	2.433	0.2	0.001189	2.17	0.0595	2.17	0.0595	1.537	0.452	1.537	0.452	3.311	0.0553	3.311	0.0553
							exm936104	NA	-265.587	NA	MYEOV	NS	>>	0.1	0	NA	NA	0	NA	NA	0	NA	NA	0	>>	0.13	0	NA	NA	0	0.984	0.213	0.893	0.42	0.994	0.727	0.957	0.805	1.004	0.894	1.037	0.898
							exm936196	rs56107468	161.237	NA	ORAOV1	NS	1.134	0.32	0.0196819	1.122	0.39	0.06431	1.401	0.83	0.001241	NA	NA	0	1.011	0.98	0.006144	2.493	0.19	0.001189	1.134	0.317	NA	NA	1.135	0.436	NA	NA	1.036	0.89	NA	NA
							exm936199	rs138132534	185.292	NA	FGF19	NS	<<	0.42	0.000132591	<<	0.44	0.000466	NA	NA	0	NA	NA	0	NA	NA	0	NA	NA	0	1.119	0.699	1.119	0.699	1.369	0.374	1.369	0.374	0.301	0.211	0.301	0.211
							exm936291	rs61623544	302.345	NA	FGF3	NS	0.824	0.56	0.00304878	0.86	0.65	0.01072	NA	NA	0	NA	NA	0	NA	NA	0	NA	NA	0	0.824	0.563	0.824	0.563	1.113	0.779	1.113	0.779	0.68	0.588	0.68	0.588
							exm936168	rs9344	134.146	0.039	CCND1	SP	1.011	0.72	0.405819	1.041	0.61	0.2428	1.05	0.68	0.5409	0.963	0.52	0.4906	0.986	0.85	0.4094	1.054	0.41	0.4774	1.012	0.714	NA	NA	1.05	0.22	NA	NA	1.002	0.973	NA	NA
rs11820646	11	129461171	50	5	0	0	exm969752	rs142822705	-154.523	0	BARX2	NS	1.562	0.015	0.00536779	1.29	0.54	0.005592	3.055	0.21	0.002481	NA	NA	0	1.43	0.45	0.004224	1.627	0.041	0.01308	1.592	0.00934	1.592	0.00934	1.579	0.0355	1.579	0.0355	1.887	0.0741	1.887	0.0741
							exm969729	NA	-467.827	NA	ARHGAP32	NS	7.459	0.041	6.62691e-05	NA	NA	0	NA	NA	0	NA	NA	0	>>	0.035	0	2.865	0.44	0.0002973	0.949	0.294	0.895	0.308	0.933	0.269	0.979	0.874	0.847	0.14	0.833	0.413
							exm970019	rs116056970	291.223	NA	NFRKB	NS	2.492	0.045	0.00072896	3.279	0.011	0.002097	NA	NA	0	NA	NA	0	<<	0.49	0.000384	<<	0.45	0.0002973	0.948	0.689	0.948	0.689	0.899	0.531	0.899	0.531	0.46	0.0676	0.46	0.0676
							exm970107	rs139189234	320.871	NA	PRDM10	NS	>>	0.052	0	>>	0.051	0	NA	NA	0	NA	NA	0	NA	NA	0	NA	NA	0	1	0.99	0.945	0.581	0.96	0.198	0.87	0.3	1.069	0.233	0.859	0.501
							exm969822	rs150180062	263.371	NA	TMEM45B	NS	<<	0.15	0.000530152	<<	0.14	0.001864	NA	NA	0	NA	NA	0	NA	NA	0	NA	NA	0	0.974	0.496	1.012	0.945	0.966	0.483	1.045	0.836	0.909	0.268	0.91	0.786
rs12422552	12	14413931	46	3	0	0	exm986830	rs2287541	250.319	0.003614	PLBD1	NS	1.138	0.029	0.06945	1.18	0.47	0.01911	0.631	0.041	0.1005	0.883	0.55	0.02286	1.239	0.0092	0.2224	1.231	0.081	0.06361	0.993	0.744	1.11	0.433	0.992	0.784	1.301	0.0957	0.981	0.698	1.049	0.864
							exm1760914	rs191777682	364.917	0	GUCY2C	SP	0.437	0.04	0.00238885	NA	NA	0	NA	NA	0	NA	NA	0	0.462	0.057	0.01347	<<	0.58	0.0002976	0.786	0.127	0.786	0.127	0.735	0.136	0.735	0.136	0.872	0.675	0.872	0.675
							exm986690	rs111490805	164.423	0.000357	ATF7IP	NS	1.586	0.11	0.00198807	1.721	0.53	0.000932	>>	0.15	0	NA	NA	0	1.799	0.22	0.00384	1.251	0.6	0.004756	1.031	0.432	1.08	0.518	1.07	0.166	1.309	0.0513	0.874	0.105	0.864	0.613
rs10771399	12	28155080	49	7	3	1	exm991649	rs10771427	450.346	0.002	CCDC91	NS	1.128	0.00047	0.327038	1.165	0.073	0.1726	1.211	0.2	0.2308	1.144	0.026	0.589	1.018	0.81	0.3337	1.193	0.014	0.2286	1.029	0.328	0.897	0.449	1.019	0.611	0.71	0.0901	0.973	0.679	1.428	0.132
							exm991497	rs149243938	-264.572	NA	MRPS35	NS	<<	0.063	0.00072896	<<	0.076	0.002563	NA	NA	0	NA	NA	0	NA	NA	0	NA	NA	0	0.97	0.478	0.575	0.117	0.963	0.482	0.564	0.207	1.054	0.588	0.821	0.77
							exm991398	rs138941072	-313.82	0	PPFIBP1	NS	1.9	0.081	0.00112657	4.075	0.13	0.000466	NA	NA	0	NA	NA	0	1.153	0.84	0.002304	2.222	0.099	0.002675	1.015	0.819	0.937	0.601	1.086	0.292	1.153	0.324	0.91	0.544	0.518	0.0838
							exm991437	rs79280249	-305.414	NA	REP15	NS	1.187	0.19	0.0133201	3.058	0.21	0.000699	0.85	0.85	0.004963	0.71	0.22	0.01441	1.443	0.019	0.04954	0.663	0.62	0.002081	0.973	0.543	<<	0.564	0.983	0.762	<<	0.661	0.909	0.366	<<	0.872
							exm991523	rs142140635	-238.76	NA	MANSC4	NS	2.341	0.22	0.000265076	NA	NA	0	NA	NA	0	NA	NA	0	NA	NA	0	2.547	0.17	0.001189	0.991	0.569	1.122	0.753	0.991	0.627	0.876	0.789	1.009	0.797	1.394	0.654
							exm1765856	NA	-38.722	NA	PTHLH	NS	0.601	0.36	0.00112672	NA	NA	0	>>	0.21	0	0.503	0.27	0.003976	NA	NA	0	<<	0.47	0.0002973	1.015	0.667	0.582	0.325	0.976	0.566	0.498	0.343	1.014	0.852	<<	0.376
							exm1765751	NA	-221.329	NA	KLHDC5	NS	1.273	0.63	0.000795334	NA	NA	0	>>	0.19	0	1.1	0.86	0.002984	NA	NA	0	NA	NA	0	1.274	0.631	1.274	0.631	1.486	0.495	1.486	0.495	2.169	0.454	2.169	0.454
rs17356907	12	96027759	144	9	8	2	exm1027565	rs138854457	233.164	NA	CCDC38	NS	0.102	0.0054	0.00225315	0.11	0.0084	0.007456	NA	NA	0	NA	NA	0	<<	0.39	0.000768	NA	NA	0	1.004	0.874	0.64	0.00143	1.011	0.736	0.746	0.0882	0.927	0.204	0.602	0.0989
							exm1027743	rs143935341	342.488	NA	HAL	NS	>>	0.016	0	NA	NA	0	NA	NA	0	NA	NA	0	NA	NA	0	>>	0.015	0	1.038	0.434	1.107	0.408	1.052	0.39	1.176	0.282	1.033	0.77	0.878	0.652
							exm1027113	rs150155970	-425.055	NA	FGD6	NS	>>	0.027	0	>>	0.04	0	NA	NA	0	NA	NA	0	NA	NA	0	NA	NA	0	0.983	0.643	0.988	0.892	0.966	0.441	0.888	0.336	1.176	0.0426	1.028	0.885
							exm1027723	rs151279149	332.526	NA	AMDHD1	ST	>>	0.054	0	>>	0.05	0	NA	NA	0	NA	NA	0	NA	NA	0	NA	NA	0	0.971	0.396	0.932	0.628	0.936	0.131	0.906	0.603	0.96	0.588	0.597	0.132
							exm1027270	NA	-346.267	NA	VEZT	NS	2.313	0.065	0.000662691	1.538	0.62	0.000932	NA	NA	0	>>	0.26	0	<<	0.55	0.000384	2.696	0.092	0.001486	1.003	0.9	0.891	0.368	0.997	0.937	0.871	0.408	0.937	0.272	1.056	0.823
							exm1027483	rs151087404	49.551	0.001	NTN4	NS	>>	0.11	0	NA	NA	0	NA	NA	0	NA	NA	0	NA	NA	0	>>	0.097	0	1.023	0.673	0.923	0.555	1.044	0.524	0.784	0.186	1.012	0.919	1.037	0.896
							exm1027923	rs143721623	395.084	0.002	LTA4H	NS	0.644	0.18	0.00284957	0.95	0.95	0.001631	<<	0.45	0.001241	<<	0.19	0.001243	0.344	0.3	0.002304	0.824	0.62	0.007134	0.601	0.0533	0.601	0.0533	0.576	0.102	0.576	0.102	0.416	0.21	0.416	0.21
							exm1027388	rs144760209	-112.797	NA	USP44	NS	<<	0.31	0.000132538	<<	0.56	0.000233	NA	NA	0	NA	NA	0	NA	NA	0	<<	0.44	0.0002973	0.989	0.716	0.978	0.872	1.003	0.933	0.841	0.335	0.984	0.799	0.822	0.534
							exm1027339	rs143687752	-148.072	NA	METAP2	NS	<<	0.35	0.000132538	NA	NA	0	NA	NA	0	NA	NA	0	<<	0.5	0.000384	<<	0.5	0.0002973	0.978	0.898	0.978	0.898	0.8	0.339	0.8	0.339	1.089	0.843	1.089	0.843
rs1292011	12	115836522	0	0	0	0	NA	NA	NA	NA	NA	NA	NA	NA	NA	NA	NA	NA	NA	NA	NA	NA	NA	NA	NA	NA	NA	NA	NA	NA	NA	NA	NA	NA	NA	NA	NA	NA	NA	NA	NA	NA
rs11571833	13	32972626	137	5	96	3	exm1795036	NA	43.979	NA	N4BP2L2	NS	5.927	0.004	0.000198807	>>	0.034	0	NA	NA	0	NA	NA	0	4.594	0.02	0.001152	NA	NA	0	1.008	0.726	1.264	0.0218	0.967	0.234	1.185	0.204	1.033	0.482	1.411	0.0608
							exm1061516	NA	-220.087	NA	FRY	NS	>>	0.0045	0	NA	NA	0	NA	NA	0	NA	NA	0	NA	NA	0	>>	0.004	0	0.962	0.225	0.935	0.534	0.943	0.136	0.964	0.782	1.084	0.248	1.001	0.995
							exm1061931	rs1799944	-61.163	0	BRCA2	NS	0.833	0.0046	0.070851	1.249	0.16	0.04031	0.672	0.2	0.04839	0.788	0.012	0.1327	0.824	0.2	0.06989	0.763	0.12	0.04194	0.988	0.619	0.946	0.21	0.999	0.973	0.938	0.262	0.922	0.131	0.912	0.328
							exm1062427	rs187975521	359.718	0	PDS5B	NS	2.869	0.074	0.000331345	1.691	0.67	0.000466	NA	NA	0	NA	NA	0	5.288	0.11	0.000384	2.261	0.41	0.0005945	0.822	0.378	0.822	0.378	1.033	0.899	1.033	0.899	0.421	0.214	0.421	0.214
							exm1062208	rs149135496	4.473	0.027	N4BP2L1	NS	0.601	0.52	0.000530152	<<	0.6	0.000233	NA	NA	0	NA	NA	0	>>	0.093	0	0.327	0.27	0.002081	0.601	0.517	0.601	0.517	0.51	0.52	0.51	0.52	<<	0.533	<<	0.533
rs2236007	14	37132769	28	6	16	3	exm2275395	NA	21.342	NA	SLC25A21	ST	3.698	0.0086	0.000397614	NA	NA	0	<<	0.52	0.001241	4.48	0.0042	0.001243	NA	NA	0	NA	NA	0	1.184	0.0687	1.196	0.282	1.171	0.182	1.086	0.704	1.114	0.568	0.91	0.809
							exm1097293	rs149685675	-349.031	NA	MBIP	NS	3.089	0.067	0.000265076	NA	NA	0	NA	NA	0	NA	NA	0	2.041	0.38	0.001152	6.616	0.063	0.0002973	0.989	0.825	2.097	0.194	0.943	0.359	1.76	0.422	1.093	0.39	2.07	0.497
							exm1097430	rs7158653	-81.185	NA	NKX2-8	NS	<<	0.085	0.00072896	<<	0.091	0.002563	NA	NA	0	NA	NA	0	NA	NA	0	NA	NA	0	0.888	0.378	0.888	0.378	0.773	0.155	0.773	0.155	0.801	0.458	0.801	0.458
							exm1097340	rs117932795	-186.487	0.011	SFTA3	NS	1.248	0.1	0.0104705	1.271	0.5	0.00699	0.521	0.41	0.009926	1.33	0.84	0.0002485	1.173	0.6	0.01152	1.333	0.098	0.02646	1.269	0.074	1.877	0.344	1.059	0.738	0.8	0.84	1.126	0.706	<<	0.548
							exm1097377	NA	-144.306	NA	NKX2-1	NS	0.508	0.35	0.000928751	0.283	0.18	0.003262	NA	NA	0	NA	NA	0	>>	0.33	0	NA	NA	0	0.509	0.347	0.509	0.347	0.903	0.888	0.903	0.888	<<	0.361	<<	0.361
							exm1097458	rs143020311	-0.161	NA	PAX9	NS	0.436	0.43	0.000397614	>>	0.074	0	NA	NA	0	NA	NA	0	<<	0.19	0.001536	<<	0.4	0.0005945	1.068	0.735	1.068	0.735	1.196	0.457	1.196	0.457	1.268	0.501	1.268	0.501
rs2588809	14	68660428	62	3	0	0	exm1110082	rs140756827	-410.281	0.018	ZFYVE26	NS	3.023	0.00079	0.000994036	1.928	0.47	0.000699	>>	0.045	0	>>	0.42	0	2.361	0.13	0.002304	3.525	0.012	0.001784	0.973	0.183	1.032	0.621	0.974	0.298	0.978	0.781	0.958	0.364	1.225	0.109
							exm1110291	rs142567687	-328.665	NA	RAD51B	NS	8.552	0.027	6.62691e-05	>>	0.051	0	NA	NA	0	NA	NA	0	>>	0.11	0	2.358	0.53	0.0002973	1.046	0.61	0.926	0.535	1.099	0.391	0.959	0.787	0.999	0.997	1.012	0.962
							exm1109854	rs17852293	-466.697	0.024	RDH12	NS	0.949	0.28	0.118306	0.92	0.45	0.1058	1.507	0.064	0.06203	1.025	0.8	0.1064	0.86	0.14	0.1448	0.939	0.5	0.1415	0.952	0.304	1.412	0.571	0.947	0.369	0.582	0.608	1.053	0.622	4.202	0.052
rs999737	14	69034682	13	3	0	0	exm1110581	rs145517654	486.955	0.001	DCAF5	NS	0.374	0.013	0.00291584	<<	0.16	0.001631	<<	0.31	0.002481	0.849	0.78	0.002982	<<	0.33	0.000768	0.312	0.048	0.006243	0.511	0.00469	0.511	0.00469	0.539	0.0381	0.539	0.0381	0.319	0.0859	0.319	0.0859
							exm1110404	rs147023729	306.968	NA	ACTN1	NS	<<	0.48	6.62691e-05	NA	NA	0	NA	NA	0	NA	NA	0	NA	NA	0	<<	0.46	0.0002973	1.101	0.538	1.101	0.538	1.342	0.099	1.342	0.099	0.432	0.0921	0.432	0.0921
							exm1110367	rs35162541	222.437	NA	ZFP36L1	NS	1.214	0.61	0.00159046	0.68	0.61	0.002563	1.851	0.66	0.001241	1.612	0.36	0.002485	1.177	0.89	0.000768	NA	NA	0	1.214	0.61	1.214	0.61	1.761	0.165	1.761	0.165	0.934	0.947	0.934	0.947
rs941764	14	91841069	119	9	41	2	exm1121384	NA	-34.807	NA	CCDC88C	NS	2.916	0.011	0.000662691	2.4	0.33	0.000699	>>	0.18	0	2.73	0.056	0.00174	NA	NA	0	>>	0.17	0	0.999	0.961	0.863	0.02	0.991	0.8	0.865	0.0721	0.985	0.815	0.724	0.0317
							exm1120915	NA	-185.735	NA	C14orf159	NS	4.568	0.019	0.000198807	2.985	0.42	0.000233	>>	0.2	0	NA	NA	0	>>	0.057	0	2.276	0.4	0.0005945	0.967	0.196	0.993	0.926	0.995	0.876	0.995	0.959	0.945	0.317	0.821	0.245
							exm1121013	rs61745750	-140.664	0.005	GPR68	NS	3.004	0.06	0.000331829	<<	0.47	0.0004671	<<	0.54	0.001256	NA	NA	0	NA	NA	0	6.769	0.0073	0.0005945	1.224	0.593	1.224	0.593	1.702	0.186	1.702	0.186	0.934	0.948	0.934	0.948
							exm1121714	rs142907552	495.605	NA	FBLN5	NS	>>	0.098	0	NA	NA	0	NA	NA	0	NA	NA	0	NA	NA	0	>>	0.11	0	1.156	0.425	1.156	0.425	1.072	0.758	1.072	0.758	1.57	0.246	1.57	0.246
							exm1121701	rs79795065	437.76	NA	TC2N	NS	0.668	0.12	0.00622929	0.644	0.11	0.0212	NA	NA	0	NA	NA	0	0.94	0.95	0.001152	NA	NA	0	1.072	0.433	0.827	0.34	1.141	0.234	0.757	0.303	1.098	0.606	0.907	0.805
							exm1120803	rs141570904	-474.506	NA	RPS6KA5	NS	0.411	0.13	0.00165673	0.283	0.068	0.005825	NA	NA	0	NA	NA	0	>>	0.12	0	NA	NA	0	0.817	0.179	0.817	0.179	0.956	0.801	0.956	0.801	0.682	0.283	0.682	0.283
							exm1121590	NA	298.173	NA	CATSPERB	NS	170.77	0.18	0	NA	NA	0	NA	NA	0	392.417	0.26	0	NA	NA	0	NA	NA	0	1.019	0.712	1.026	0.873	1.026	0.684	1.027	0.898	0.807	0.0814	1.166	0.608
							exm1121424	rs139686419	86.697	NA	SMEK1	NS	1.158	0.84	0.000397614	<<	0.27	0.000932	NA	NA	0	>>	0.13	0	2.238	0.41	0.000768	NA	NA	0	1.158	0.837	1.158	0.837	1.428	0.664	1.428	0.664	<<	0.445	<<	0.445
							exm1121497	rs12323881	199.724	0.014	C14orf184	NS	0.996	0.92	0.168633	0.875	0.22	0.1142	1.026	0.85	0.3945	1.019	0.75	0.3654	0.97	0.84	0.0576	0.984	0.93	0.03478	0.996	0.92	NA	NA	0.985	0.782	NA	NA	1.048	0.659	NA	NA
rs3803662	16	52586341	7	1	1	1	exm1240354	NA	-88.472	NA	TOX3	NS	2.293	0.06	0.000662691	3.446	0.36	0.000233	>>	0.17	0	NA	NA	0	2.003	0.32	0.001536	1.768	0.39	0.001486	1.012	0.931	1.224	0.321	0.849	0.378	1.026	0.926	1.238	0.386	1.583	0.223
rs17817449	16	53813367	56	5	11	2	exm1240977	rs150450891	46.886	NA	FTO	NS	7.678	0.033	6.62691e-05	NA	NA	0	NA	NA	0	NA	NA	0	>>	0.19	0	5.818	0.091	0.0002973	1.011	0.931	1.011	0.931	1.009	0.956	1.009	0.956	0.784	0.437	0.784	0.437
							exm1240833	rs142349647	-130.427	NA	RPGRIP1L	NS	2.941	0.044	0.000397614	>>	0.068	0	>>	0.18	0	>>	0.071	0	>>	0.11	0	1.247	0.76	0.001784	0.988	0.612	0.927	0.402	0.97	0.304	0.953	0.669	0.924	0.175	0.723	0.154
							exm1240753	rs118126947	-285.31	0.006	AKTIP	NS	2.219	0.054	0.000795229	<<	0.47	0.000466	1.913	0.65	0.001241	NA	NA	0	NA	NA	0	2.613	0.033	0.002675	2.219	0.0537	2.219	0.0537	2.36	0.0679	2.36	0.0679	2.172	0.449	2.172	0.449
							exm1240702	rs61747629	-308.831	0.002	RBL2	NS	0.707	0.12	0.00563287	0.945	0.93	0.00233	<<	0.34	0.002481	NA	NA	0	0.631	0.29	0.008449	0.749	0.31	0.01516	0.981	0.82	0.86	0.178	0.893	0.282	0.782	0.0871	0.913	0.646	0.905	0.68
							exm1240531	NA	-482.326	NA	CHD9	NS	<<	0.17	0.000331345	<<	0.34	0.000699	NA	NA	0	NA	NA	0	<<	0.39	0.000768	NA	NA	0	1.002	0.953	0.952	0.784	0.988	0.77	0.896	0.632	1.023	0.755	0.86	0.7
rs11075995	16	53855291	51	6	9	1	exm1240977	rs150450891	4.962	NA	FTO	NS	7.678	0.033	6.62691e-05	NA	NA	0	NA	NA	0	NA	NA	0	>>	0.19	0	5.818	0.091	0.0002973	1.011	0.931	1.011	0.931	1.009	0.956	1.009	0.956	0.784	0.437	0.784	0.437
							exm1240833	rs142349647	-172.351	NA	RPGRIP1L	NS	2.941	0.044	0.000397614	>>	0.068	0	>>	0.18	0	>>	0.071	0	>>	0.11	0	1.247	0.76	0.001784	0.988	0.612	0.927	0.402	0.97	0.304	0.953	0.669	0.924	0.175	0.723	0.154
							exm1240753	rs118126947	-327.234	0.009755	AKTIP	NS	2.219	0.054	0.000795229	<<	0.47	0.000466	1.913	0.65	0.001241	NA	NA	0	NA	NA	0	2.613	0.033	0.002675	2.219	0.0537	2.219	0.0537	2.36	0.0679	2.36	0.0679	2.172	0.449	2.172	0.449
							exm1240702	rs61747629	-350.755	2.3e-05	RBL2	NS	0.707	0.12	0.00563287	0.945	0.93	0.00233	<<	0.34	0.002481	NA	NA	0	0.631	0.29	0.008449	0.749	0.31	0.01516	0.981	0.82	0.86	0.178	0.893	0.282	0.782	0.0871	0.913	0.646	0.905	0.68
							exm1241040	rs1126960	462.881	0.002752	IRX3	NS	1.058	0.21	0.147051	1.056	0.5	0.2025	1.215	0.42	0.06948	1.373	0.38	0.005219	0.931	0.44	0.1866	1.125	0.1	0.2339	1.057	0.219	<<	0.532	1.066	0.26	<<	0.655	1.093	0.355	<<	0.782
							exm1240600	rs3743771	-496.852	0.020708	CHD9	NS	0.96	0.29	0.202386	0.923	0.38	0.1629	0.929	0.62	0.2159	0.966	0.64	0.1976	0.901	0.28	0.1713	1.03	0.68	0.2794	1.002	0.953	0.952	0.784	0.988	0.77	0.896	0.632	1.023	0.755	0.86	0.7
rs13329835	16	80650805	74	8	15	2	exm1261324	rs145595395	444.68	NA	C16orf46	ST	18.027	0.00028	6.62691e-05	>>	0.0053	0	>>	0.15	0	6.417	0.069	0.0002485	>>	0.13	0	NA	NA	0	1.011	0.684	0.959	0.74	1.006	0.855	0.985	0.925	0.875	0.0383	0.674	0.23
							exm1261070	rs187504367	380.188	NA	C16orf61	NS	3.183	0.025	0.000397614	NA	NA	0	>>	0.045	0	2.33	0.14	0.001491	NA	NA	0	NA	NA	0	1.017	0.604	1.048	0.829	0.982	0.662	1.067	0.808	0.978	0.76	0.691	0.607
							exm1261187	rs147897268	426.154	NA	ATMIN	NS	<<	0.035	0.00072896	NA	NA	0	NA	NA	0	<<	0.029	0.002734	NA	NA	0	NA	NA	0	1.017	0.667	1.073	0.695	1.003	0.959	1.166	0.471	0.928	0.435	0.863	0.773
							exm1261399	rs113616489	492.082	NA	PKD1L2	NS	0.609	0.042	0.00743001	0.549	0.022	0.02563	NA	NA	0	>>	0.66	0	1.951	0.5	0.000768	NA	NA	0	1.006	0.131	1.047	0.255	1.009	0.0759	1.056	0.285	1.003	0.719	1.107	0.2
							exm1260941	rs148875027	-8.811	NA	CDYL2	NS	5.437	0.14	6.62691e-05	<<	0.63	0.000233	NA	NA	0	NA	NA	0	NA	NA	0	>>	0.061	0	0.915	0.636	0.915	0.636	0.758	0.273	0.758	0.273	0.999	0.998	0.999	0.998
							exm1261087	rs935939	400.16	NA	CENPN	NS	1.214	0.19	0.0125249	1.216	0.19	0.0431	NA	NA	0	NA	NA	0	1.327	0.72	0.001536	NA	NA	0	1.019	0.356	0.911	0.401	1.003	0.899	0.947	0.69	0.984	0.739	0.828	0.457
							exm1261362	rs8177877	473.411	0	GCSH	NS	0.915	0.33	0.0384361	0.907	0.38	0.1058	0.454	0.31	0.009926	1.034	0.87	0.02038	0.891	0.77	0.008833	0.861	0.76	0.003864	0.915	0.333	NA	NA	0.929	0.535	NA	NA	0.773	0.207	NA	NA
							exm1260913	rs13332289	-73.595	NA	DYNLRB2	NS	0.735	0.34	0.00371107	0.775	0.45	0.01235	<<	0.42	0.001241	NA	NA	0	1.073	0.95	0.000768	NA	NA	0	0.71	0.267	0.71	0.267	1.142	0.692	1.142	0.692	<<	0.0507	<<	0.0507
rs6504950	17	53056471	16	5	13	3	exm1338209	rs1156287	20.328	0.86	STXBP4	NS	0.902	0.021	0.155024	0.888	0.3	0.1009	0.849	0.24	0.3102	0.783	0.082	0.05318	0.84	0.064	0.1782	0.987	0.86	0.2907	0.924	0.0623	1.123	0.324	0.913	0.0817	0.99	0.95	0.93	0.45	1.182	0.487
							exm1338304	NA	415.415	NA	MMD	NS	>>	0.13	0	NA	NA	0	NA	NA	0	NA	NA	0	NA	NA	0	>>	0.097	0	>>	0.132	>>	0.132	>>	0.0507	>>	0.0507	NA	NA	NA	NA
							exm1338297	rs151123188	341.675	NA	HLF	NS	<<	0.39	0.000132556	<<	0.55	0.000233	NA	NA	0	NA	NA	0	NA	NA	0	<<	0.56	0.0002974	<<	0.39	<<	0.39	<<	0.504	<<	0.504	<<	0.73	<<	0.73
							exm1338138	NA	-42.462	NA	TOM1L1	SP	3.134	0.4	6.62691e-05	<<	0.62	0.000233	NA	NA	0	NA	NA	0	NA	NA	0	>>	0.14	0	1.19	0.303	1.19	0.303	1.152	0.511	1.152	0.511	0.903	0.798	0.903	0.798
							exm1338190	rs73990239	-10.524	NA	COX11	NS	0.924	0.89	0.000994036	0.951	0.93	0.003495	NA	NA	0	NA	NA	0	NA	NA	0	NA	NA	0	0.924	0.89	0.924	0.89	0.452	0.431	0.452	0.431	<<	0.316	<<	0.316
rs527616	18	24337424	35	4	1	1	exm1380000	NA	159.19	NA	CHST9	NS	5.483	0.041	0.000132538	7.816	0.049	0.000233	NA	NA	0	<<	0.55	0.0002485	>>	0.24	0	NA	NA	0	1.021	0.874	0.803	0.502	1.015	0.926	0.874	0.732	0.94	0.84	0.422	0.382
							exm1379948	rs151292719	103.739	NA	AQP4	NS	7.523	0.058	6.62691e-05	6.627	0.082	0.000233	NA	NA	0	NA	NA	0	NA	NA	0	NA	NA	0	1.202	0.205	1.202	0.205	1.425	0.0416	1.425	0.0416	1.13	0.681	1.13	0.681
							exm1379855	rs115443182	-436.265	NA	TAF4B	NS	1.571	0.1	0.00278367	1.533	0.14	0.009557	NA	NA	0	NA	NA	0	2.124	0.58	0.000384	NA	NA	0	1.041	0.311	1.008	0.945	1.002	0.971	1.082	0.564	0.938	0.464	0.832	0.46
							exm1379898	NA	-256.307	NA	KCTD1	NS	2.741	0.31	0.000132538	3.935	0.3	0.000233	NA	NA	0	NA	NA	0	2.241	0.56	0.000384	NA	NA	0	1.207	0.689	1.207	0.689	1.223	0.727	1.223	0.727	0.712	0.743	0.712	0.743
rs1436904	18	24570667	17	3	9	1	exm1380000	NA	-74.053	NA	CHST9	NS	5.483	0.041	0.000132538	7.816	0.049	0.000233	NA	NA	0	<<	0.55	0.0002485	>>	0.24	0	NA	NA	0	1.021	0.874	0.803	0.502	1.015	0.926	0.874	0.732	0.94	0.84	0.422	0.382
							exm1379948	rs151292719	-129.504	NA	AQP4	NS	7.523	0.058	6.62691e-05	6.627	0.082	0.000233	NA	NA	0	NA	NA	0	NA	NA	0	NA	NA	0	1.202	0.205	1.202	0.205	1.425	0.0416	1.425	0.0416	1.13	0.681	1.13	0.681
							exm1379898	NA	-489.55	NA	KCTD1	NS	2.741	0.31	0.000132538	3.935	0.3	0.000233	NA	NA	0	NA	NA	0	2.241	0.56	0.000384	NA	NA	0	1.207	0.689	1.207	0.689	1.223	0.727	1.223	0.727	0.712	0.743	0.712	0.743
rs8170	19	17389704	378	28	141	12	exm1443029	NA	377.24	NA	UNC13A	NS	9.741	0.00057	0.000132538	<<	0.64	0.000233	2.284	0.55	0.001241	NA	NA	0	>>	0.0063	0	>>	0.0034	0	1.034	0.287	1.365	0.137	1.046	0.25	1.583	0.0544	1.023	0.749	0.522	0.357
							exm1441939	NA	27.407	NA	MRPL34	NS	>>	0.0048	0	>>	0.028	0	NA	NA	0	NA	NA	0	NA	NA	0	>>	0.038	0	1.136	0.744	1.136	0.744	1.555	0.294	1.555	0.294	1.64	0.506	1.64	0.506
							exm1442184	rs149578279	62.349	NA	GTPBP3	NS	2.255	0.0077	0.00185578	2.077	0.022	0.006524	NA	NA	0	NA	NA	0	>>	0.37	0	>>	0.086	0	0.989	0.664	1.072	0.649	0.984	0.616	0.958	0.834	1.047	0.428	1.238	0.496
							exm1441175	NA	-90.867	NA	MYO9B	NS	>>	0.013	0	>>	0.068	0	NA	NA	0	NA	NA	0	>>	0.14	0	NA	NA	0	0.994	0.698	1.038	0.638	0.976	0.231	1.051	0.621	1.025	0.499	1.356	0.0394
							exm1926374	rs183538371	-19.295	NA	USHBP1	NS	2.608	0.016	0.000729733	NA	NA	0	1.796	0.41	0.004963	2.651	0.073	0.001495	>>	0.14	0	<<	0.55	0.0002973	0.97	0.271	1.063	0.643	0.976	0.475	1.117	0.5	0.894	0.077	0.843	0.575
							exm1440258	rs148020552	-471.244	NA	NWD1	NS	3.593	0.02	0.000397614	3.132	0.05	0.001398	NA	NA	0	NA	NA	0	NA	NA	0	>>	0.16	0	0.992	0.531	1.029	0.589	1.007	0.695	1.08	0.25	0.975	0.361	0.889	0.319
							exm1441044	rs1130222	-218.819	0.018	HAUS8	NS	0.93	0.02	0.451731	0.98	0.76	0.4341	0.894	0.37	0.4328	1.016	0.8	0.4244	0.749	6.6e-05	0.5546	0.959	0.51	0.4319	0.94	0.0307	0.905	0.785	0.937	0.067	0.57	0.336	0.892	0.0807	1.407	0.55
							exm1443144	rs116083435	447.265	0.001	MAP1S	NS	1.755	0.03	0.00231942	11.696	0.0082	0.000233	<<	0.47	0.001241	1.85	0.12	0.003728	1.848	0.21	0.003456	0.951	0.93	0.002675	1.069	0.0547	1.236	0.124	1.066	0.14	1.219	0.245	1.143	0.0589	0.771	0.479
							exm1440803	rs9305083	-307.997	0.001	CPAMD8	NS	0.863	0.032	0.0917164	0.838	0.023	0.2859	1.302	0.66	0.009926	>>	0.53	0	0.938	0.77	0.02803	0.892	0.61	0.02259	0.979	0.228	0.985	0.802	0.998	0.933	0.98	0.789	0.954	0.229	0.961	0.752
							exm1442615	rs138735905	248.417	0	FAM129C	NS	0.76	0.037	0.0161696	0.582	0.16	0.01072	2.714	0.047	0.008685	>>	0.15	0	0.482	0.0086	0.02611	0.838	0.32	0.03656	0.984	0.447	0.903	0.304	1.002	0.932	0.964	0.769	0.955	0.348	0.686	0.0936
							exm1440363	rs149533205	-416.48	NA	SIN3B	NS	>>	0.04	0	NA	NA	0	NA	NA	0	NA	NA	0	NA	NA	0	>>	0.037	0	1.209	0.27	1.209	0.27	1	0.999	1	0.999	1.502	0.245	1.502	0.245
							exm1441781	rs145003500	4.819	NA	ANKLE1	NS	<<	0.041	0.000596422	NA	NA	0	<<	0.41	0.001241	NA	NA	0	<<	0.21	0.001536	<<	0.2	0.001189	0.983	0.276	0.986	0.865	0.99	0.598	0.912	0.395	0.933	0.0403	0.905	0.56
							exm2275051	NA	-388.744	NA	F2RL3	NS	3.898	0.047	0.000199521	NA	NA	0	>>	0.19	0	3.282	0.11	0.0007478	NA	NA	0	NA	NA	0	1.017	0.634	1.075	0.659	1.024	0.595	1.113	0.592	0.949	0.503	1.305	0.428
							exm1442781	rs142311552	281.544	0.001	GLT25D1	NS	4.537	0.052	0.000132538	>>	0.08	0	NA	NA	0	NA	NA	0	7.049	0.046	0.000384	<<	0.47	0.0002973	0.896	0.625	0.896	0.625	0.56	0.0851	0.56	0.0851	1.018	0.97	1.018	0.97
							exm1926629	rs184098931	144.856	NA	FAM125A	NS	0.508	0.08	0.00245195	>>	0.063	0	0.82	0.87	0.002481	0.395	0.032	0.008698	NA	NA	0	NA	NA	0	0.851	0.0684	0.873	0.281	0.823	0.0853	0.892	0.47	0.929	0.698	0.94	0.813
							exm1442579	rs141353536	238.423	0	PGLS	NS	0.299	0.092	0.000927767	<<	0.58	0.000233	NA	NA	0	NA	NA	0	0.182	0.069	0.00384	0.774	0.83	0.0008918	0.913	0.642	0.913	0.642	0.812	0.42	0.812	0.42	1.032	0.937	1.032	0.937
							exm1442530	rs149049260	221.859	NA	SLC27A1	NS	3.218	0.11	0.000198807	3.062	0.41	0.000233	NA	NA	0	NA	NA	0	NA	NA	0	2.852	0.23	0.0005945	0.839	0.223	0.839	0.223	0.886	0.498	0.886	0.498	0.7	0.298	0.7	0.298
							exm1441487	rs142863081	-50.008	NA	OCEL1	NS	0.477	0.12	0.00238569	0.501	0.14	0.008155	NA	NA	0	NA	NA	0	<<	0.48	0.000384	NA	NA	0	0.96	0.274	1.013	0.911	0.946	0.23	0.992	0.959	0.822	0.021	0.953	0.855
							exm1441396	NA	-60.517	NA	USE1	NS	<<	0.14	0.000265076	NA	NA	0	<<	0.44	0.001241	NA	NA	0	NA	NA	0	<<	0.22	0.0008918	1.037	0.624	0.895	0.541	0.976	0.794	0.747	0.228	1.216	0.28	1.085	0.85
							exm1442008	rs149426492	48.865	0.001	ANO8	NS	2.912	0.17	0.000198807	3.69	0.33	0.000233	NA	NA	0	NA	NA	0	NA	NA	0	2.678	0.31	0.0005945	1.231	0.196	1.231	0.196	1.286	0.213	1.286	0.213	0.738	0.439	0.738	0.439
							exm1442403	rs56248314	176.93	0	NXNL1	NS	1.071	0.17	0.10399	1.125	0.49	0.03518	1.106	0.55	0.1526	1.014	0.88	0.1335	1.08	0.48	0.1137	1.131	0.16	0.1373	1.033	0.451	0.902	0.433	0.996	0.945	0.851	0.349	1.134	0.175	0.847	0.551
							exm1442216	rs142500391	86.449	0	PLVAP	NS	1.76	0.17	0.000861498	4.327	0.26	0.000233	<<	0.44	0.001241	NA	NA	0	1.019	0.98	0.00192	2.397	0.11	0.001784	1.089	0.397	1.144	0.309	1.237	0.0744	1.263	0.137	0.932	0.762	1.094	0.758
							exm1441919	rs147808769	22.661	NA	ABHD8	NS	0.516	0.18	0.00139165	<<	0.32	0.000932	0.948	0.97	0.002481	<<	0.44	0.0002485	1.038	0.98	0.000768	0.528	0.32	0.003567	1.032	0.515	0.715	0.328	1.067	0.27	0.92	0.831	0.945	0.606	1.191	0.773
							exm1441704	NA	-2.335	NA	BABAM1	NS	>>	0.19	0	NA	NA	0	NA	NA	0	NA	NA	0	>>	0.13	0	NA	NA	0	0.807	0.41	0.807	0.41	0.823	0.567	0.823	0.567	1.427	0.375	1.427	0.375
							exm1926937	rs189833366	496.591	NA	FCHO1	NS	1.833	0.2	0.000596422	<<	0.49	0.000466	5.114	0.12	0.001241	2.132	0.24	0.000994	NA	NA	0	1.725	0.68	0.0005945	1.145	0.258	1.145	0.258	1.014	0.927	1.014	0.927	1.175	0.52	1.175	0.52
							exm1441529	NA	-38.137	NA	NR2F6	NS	<<	0.24	0.000198807	NA	NA	0	NA	NA	0	NA	NA	0	<<	0.3	0.000768	<<	0.47	0.0002973	<<	0.235	<<	0.235	<<	0.366	<<	0.366	<<	0.653	<<	0.653
							exm1442300	NA	124.907	NA	BST2	NS	<<	0.38	0.000198807	<<	0.39	0.000699	NA	NA	0	NA	NA	0	NA	NA	0	NA	NA	0	0.757	0.671	0.757	0.671	0.894	0.885	0.894	0.885	<<	0.472	<<	0.472
							exm1442378	rs4808641	157.588	0	TMEM221	NS	0.968	0.54	0.0972296	0.795	0.23	0.03705	0.781	0.13	0.1873	0.97	0.68	0.2092	1.017	0.91	0.0576	1.201	0.19	0.04908	0.965	0.509	0.822	0.657	0.979	0.747	1.025	0.96	0.939	0.63	1.677	0.489
rs4808801	19	18571141	237	30	33	7	exm1444032	rs146799670	-450.453	NA	ARRDC2	NS	>>	0.0081	0	NA	NA	0	NA	NA	0	NA	NA	0	>>	0.0053	0	NA	NA	0	0.98	0.545	0.968	0.821	1.008	0.85	1.08	0.659	0.966	0.642	0.818	0.527
							exm1444777	rs112108230	-202.729	NA	KIAA1683	NS	4.961	0.0088	0.000265252	4.785	0.011	0.0009337	NA	NA	0	NA	NA	0	NA	NA	0	NA	NA	0	1.009	0.089	1.003	0.954	1.005	0.42	1.018	0.789	1.003	0.831	1.071	0.512
							exm1445457	rs148006079	1.287	0.003	ELL	NS	10.136	0.011	6.62691e-05	>>	0.069	0	>>	0.12	0	NA	NA	0	>>	0.046	0	<<	0.54	0.0002973	1.047	0.749	1.047	0.749	0.983	0.924	0.983	0.924	0.955	0.888	0.955	0.888
							exm1444431	rs143873873	-299.377	NA	PIK3R2	NS	0.732	0.019	0.0158404	<<	0.094	0.002563	0.414	0.26	0.009926	0.631	0.14	0.01267	0.809	0.17	0.06303	1.55	0.57	0.001486	0.883	0.0835	0.92	0.551	0.883	0.163	1.001	0.997	0.88	0.437	0.532	0.156
							exm1445599	rs58878398	108.295	NA	C19orf50	NS	0.545	0.034	0.00610241	0.587	0.064	0.02056	NA	NA	0	NA	NA	0	<<	0.17	0.001536	NA	NA	0	0.929	0.0187	0.692	0.0363	0.868	0.000279	0.673	0.0897	0.991	0.9	0.831	0.577
							exm1445542	rs139527778	79.332	NA	FKBP8	NS	7.709	0.04	6.62691e-05	>>	0.061	0	NA	NA	0	NA	NA	0	NA	NA	0	3.541	0.27	0.0002973	1.022	0.749	2.335	0.106	0.998	0.984	1.6	0.497	1.059	0.675	2.6	0.36
							exm1446164	rs140671518	405.343	0.004	UPF1	NS	1.434	0.058	0.00497018	1.059	0.93	0.00233	>>	0.23	0	1.769	0.69	0.0002485	1.016	0.96	0.009985	1.703	0.035	0.0113	1.434	0.0582	1.434	0.0582	1.339	0.215	1.339	0.215	1.522	0.295	1.522	0.295
							exm1927959	rs142907452	208.099	NA	KLHL26	NS	2.322	0.061	0.000795861	2.096	0.12	0.002799	NA	NA	0	NA	NA	0	>>	0.18	0	NA	NA	0	1.152	0.505	1.152	0.505	1.197	0.487	1.197	0.487	1.18	0.752	1.18	0.752
							exm1445690	rs143326783	139.365	NA	CRLF1	NS	<<	0.074	0.000530152	<<	0.45	0.000466	NA	NA	0	NA	NA	0	<<	0.13	0.00192	<<	0.51	0.0002973	1.047	0.825	1.047	0.825	0.835	0.527	0.835	0.527	0.799	0.705	0.799	0.705
							exm1445983	rs144170209	324.585	NA	COMP	NS	>>	0.076	0	NA	NA	0	>>	0.16	0	NA	NA	0	NA	NA	0	>>	0.23	0	0.997	0.951	1.021	0.961	1.041	0.553	0.515	0.362	0.881	0.264	1.984	0.267
							exm2276622	rs140768810	-25.016	NA	ISYNA1	NS	>>	0.08	0	>>	0.068	0	NA	NA	0	NA	NA	0	NA	NA	0	NA	NA	0	0.865	0.262	0.865	0.262	0.892	0.479	0.892	0.479	0.722	0.316	0.722	0.316
							exm1444560	rs61730355	-282.601	NA	IFI30	NS	3.711	0.089	0.000198807	3.543	0.1	0.000699	NA	NA	0	NA	NA	0	NA	NA	0	NA	NA	0	1.028	0.478	0.834	0.478	0.985	0.754	1.135	0.658	0.943	0.505	0.225	0.107
							exm1444093	NA	-399.188	NA	IL12RB1	NS	>>	0.091	0	>>	0.07	0	NA	NA	0	NA	NA	0	NA	NA	0	NA	NA	0	1.008	0.503	0.938	0.589	1.015	0.276	1.042	0.773	1.006	0.817	1.19	0.458
							exm1444733	NA	-227.311	NA	PDE4C	NS	0.218	0.11	0.0010603	0.264	0.17	0.003262	NA	NA	0	NA	NA	0	<<	0.38	0.000768	NA	NA	0	0.917	0.294	0.914	0.447	0.905	0.353	0.868	0.369	0.953	0.766	1.025	0.914
							exm1444566	rs186786292	-267.018	0.003	MPV17L2	NS	1.743	0.16	0.000994036	3.164	0.39	0.000233	NA	NA	0	<<	0.45	0.0002485	3.638	0.0096	0.002304	0.324	0.27	0.002081	1.054	0.194	1.743	0.16	1.019	0.707	2.02	0.12	0.965	0.698	2.742	0.167
							exm1444354	NA	-315.2	NA	MAST3	NS	4.521	0.18	6.62691e-05	NA	NA	0	NA	NA	0	>>	0.1	0	2.202	0.57	0.000384	NA	NA	0	1.008	0.795	0.981	0.942	1.022	0.541	0.696	0.34	0.907	0.141	1.366	0.511
							exm1445143	rs146900068	-72.022	NA	GDF15	NS	0.262	0.18	0.000530152	<<	0.65	0.000233	NA	NA	0	NA	NA	0	0.7	0.76	0.001152	<<	0.14	0.001189	0.995	0.878	0.262	0.176	0.979	0.601	0.444	0.435	1.009	0.903	<<	0.429
							exm1445892	rs150056965	293.22	NA	CRTC1	NS	<<	0.2	0.000265076	<<	0.59	0.000233	NA	NA	0	NA	NA	0	<<	0.49	0.000384	<<	0.37	0.0005945	1.025	0.742	0.728	0.577	0.974	0.784	0.294	0.209	1.416	0.0255	1.135	0.903
							exm1446333	rs139869066	459.47	0.005	DDX49	NS	1.305	0.2	0.00437376	0.496	0.35	0.003029	1.1	0.94	0.002481	NA	NA	0	1.149	0.68	0.009985	1.751	0.065	0.007432	1.023	0.769	1.065	0.673	1.029	0.779	0.831	0.375	1.047	0.764	1.185	0.565
							exm1446304	rs145639224	446.758	0.001	COPE	NS	0.402	0.23	0.000662691	<<	0.51	0.000233	<<	0.49	0.001241	NA	NA	0	1.171	0.86	0.001536	<<	0.12	0.001189	0.966	0.418	0.93	0.697	1.002	0.963	0.971	0.904	0.9	0.251	0.829	0.636
							exm1445219	rs138085460	-63.426	NA	LRRC25	NS	1.685	0.28	0.000927767	1.684	0.29	0.003262	NA	NA	0	NA	NA	0	NA	NA	0	NA	NA	0	1.009	0.773	1.132	0.444	1.037	0.345	1.15	0.479	0.968	0.655	0.366	0.0751
							exm1445711	rs117674834	153.554	0.009	TMEM59L	NS	1.215	0.3	0.00596975	0.742	0.55	0.0056	0.51	0.55	0.004988	>>	0.14	0	2.656	0.029	0.003456	1.141	0.59	0.01576	1.11	0.427	1.11	0.427	1.301	0.083	1.301	0.083	0.477	0.0974	0.477	0.0974
							exm1445089	rs143326827	-102.911	0.003	PGPEP1	NS	<<	0.3	0.000132538	NA	NA	0	NA	NA	0	NA	NA	0	NA	NA	0	<<	0.32	0.0005945	0.532	0.324	0.532	0.324	0.628	0.543	0.628	0.543	<<	0.327	<<	0.327
							exm1446455	rs142700713	471.256	NA	HOMER3	NS	<<	0.31	0.000132538	NA	NA	0	<<	0.55	0.001241	NA	NA	0	NA	NA	0	<<	0.39	0.0002973	0.904	0.652	0.904	0.652	1	1	1	1	0.576	0.348	0.576	0.348
							exm1443956	NA	-462.171	NA	KCNN1	NS	3.2	0.39	6.62691e-05	3.333	0.37	0.000233	NA	NA	0	NA	NA	0	NA	NA	0	NA	NA	0	3.2	0.386	3.2	0.386	5.784	0.161	5.784	0.161	<<	0.826	<<	0.826
							exm1445025	rs142576035	-179.751	NA	JUND	NS	<<	0.39	0.000132556	<<	0.53	0.0002331	NA	NA	0	NA	NA	0	<<	0.5	0.000384	NA	NA	0	<<	0.394	<<	0.394	<<	0.514	<<	0.514	<<	0.74	<<	0.74
							exm1445629	NA	129.176	NA	C19orf60	NS	1.656	0.51	0.000265076	NA	NA	0	NA	NA	0	NA	NA	0	<<	0.31	0.000768	3.141	0.19	0.0005945	0.966	0.882	0.966	0.882	1.124	0.67	1.124	0.67	0.676	0.507	0.676	0.507
							exm1445291	NA	-27.31	NA	SSBP4	NS	2.195	0.58	6.62691e-05	<<	0.53	0.000233	NA	NA	0	NA	NA	0	NA	NA	0	>>	0.27	0	1.003	0.988	1.003	0.988	1.012	0.963	1.012	0.963	0.952	0.907	0.952	0.907
							exm1446189	rs4808863	409.031	0.009	GDF1	NS	1.01	0.78	0.279	0.954	0.67	0.1079	1.138	0.44	0.1787	0.98	0.77	0.2466	0.98	0.78	0.49	1.054	0.41	0.3966	1.01	0.778	NA	NA	1.015	0.734	NA	NA	0.997	0.972	NA	NA
							exm1446217	NA	419.022	NA	CERS1	NS	1.027	0.97	0.000397614	NA	NA	0	>>	0.16	0	NA	NA	0	1.954	0.63	0.000384	0.456	0.47	0.001486	1.027	0.97	1.027	0.97	0.568	0.597	0.568	0.597	2.154	0.475	2.154	0.475
rs3760982	19	44286513	349	32	51	6	exm1477448	rs144032518	325.143	NA	ZNF224	NS	6.173	0.0032	0.000198807	<<	0.65	0.000233	NA	NA	0	>>	0.0024	0	3.361	0.16	0.000768	>>	0.11	0	1.019	0.319	1.036	0.675	1.033	0.172	1.108	0.317	0.979	0.632	0.804	0.284
							exm1476270	rs2302421	-168.16	0.005	SRRM5	NS	0.896	0.0061	0.189596	1.148	0.15	0.1219	0.782	0.2	0.1303	0.872	0.045	0.2731	0.916	0.3	0.2293	0.778	0.0054	0.1596	0.943	0.00023	0.893	0.473	0.962	0.0483	0.898	0.594	0.921	0.0232	0.833	0.597
							exm1941364	rs117617972	350.062	NA	ZNF225	NS	2.566	0.0096	0.000928013	NA	NA	0	1.234	0.82	0.003731	2.927	0.0074	0.002734	NA	NA	0	NA	NA	0	1.026	0.567	1.118	0.258	1.037	0.524	1.124	0.355	1.143	0.162	1.268	0.212
							exm1477599	rs142253299	374.011	0.001	ZNF234	NS	<<	0.012	0.000994036	<<	0.33	0.000699	NA	NA	0	NA	NA	0	<<	0.06	0.003072	<<	0.19	0.001189	0.942	0.0598	0.932	0.512	0.948	0.173	0.951	0.705	0.916	0.225	0.859	0.549
							exm1476773	rs12977303	91.156	0.42	ZNF404	NS	0.925	0.018	0.445652	0.976	0.79	0.1729	0.845	0.19	0.433	0.951	0.41	0.6119	0.944	0.43	0.5599	0.897	0.083	0.5095	0.933	0.00173	0.897	0.335	0.93	0.0105	0.886	0.395	0.932	0.13	0.705	0.206
							exm1476869	rs399098	132.311	0.405	ZNF45	NS	0.928	0.021	0.466927	1.045	0.57	0.2399	0.826	0.14	0.433	0.951	0.41	0.6136	0.902	0.15	0.5703	0.894	0.075	0.5092	0.937	0.00524	0.858	0.6	0.933	0.0181	0.794	0.556	0.92	0.112	0.618	0.49
							exm1476126	rs150547865	-187.528	NA	IRGQ	NS	<<	0.022	0.000994036	<<	0.11	0.002563	NA	NA	0	NA	NA	0	<<	0.064	0.000768	<<	0.091	0.0005945	0.779	0.231	0.779	0.231	0.733	0.249	0.733	0.249	0.785	0.635	0.785	0.635
							exm1477923	rs116197330	491.349	NA	ZNF233	NS	1.545	0.022	0.00603048	1.582	0.024	0.01934	>>	0.2	0	NA	NA	0	1.449	0.57	0.002304	0.7	0.79	0.0005945	0.94	0.0756	0.908	0.498	0.93	0.0918	0.839	0.351	0.951	0.515	1.29	0.313
							exm1477300	NA	299.656	NA	ZNF284	NS	1.752	0.034	0.00291584	1.839	0.034	0.008854	<<	0.38	0.001241	NA	NA	0	2.216	0.25	0.001536	<<	0.5	0.0002973	1.017	0.912	1.017	0.912	1.024	0.906	1.024	0.906	1.009	0.979	1.009	0.979
							exm1477856	rs139979975	453.928	NA	ZNF227	NS	1.742	0.038	0.00218688	NA	NA	0	<<	0.44	0.001241	1.832	0.026	0.007952	NA	NA	0	NA	NA	0	1.315	0.0221	1.582	0.0334	1.248	0.148	1.628	0.0564	1.236	0.396	2.227	0.0556
							exm1475558	NA	-428.393	NA	CD177	NS	3.255	0.043	0.000331345	7.766	0.049	0.000233	<<	0.51	0.001241	NA	NA	0	0.992	1	0.000768	7.815	0.037	0.0002973	0.989	0.698	0.911	0.695	0.991	0.793	0.936	0.82	0.905	0.13	0.461	0.272
							exm2229479	rs1105561	383.447	0.003	ZNF226	SP	1.066	0.047	0.428032	1.218	0.012	0.2104	1.087	0.51	0.4578	1.016	0.79	0.5142	1.043	0.55	0.4942	1.039	0.54	0.5443	1.057	0.0804	0.909	0.431	1.088	0.0319	0.954	0.753	1.003	0.964	0.83	0.481
							exm1475826	rs76853904	-280.171	0.001	PHLDB3	NS	0.457	0.054	0.00231942	<<	0.29	0.000932	2.058	0.61	0.001241	>>	0.25	0	0.25	0.048	0.006144	0.492	0.26	0.004162	0.954	0.282	0.894	0.336	0.929	0.179	0.77	0.092	0.928	0.453	0.711	0.235
							exm1477077	rs146361192	214.968	NA	ZNF155	NS	1.786	0.063	0.00198807	2.042	0.027	0.006291	NA	NA	0	NA	NA	0	2.224	0.56	0.000384	<<	0.22	0.0005945	1.015	0.748	1.432	0.0116	1.015	0.796	1.654	0.00221	1.024	0.808	1.262	0.458
							exm1476003	rs25490	-230.172	0.002	XRCC1	NS	0.794	0.065	0.0235286	0.821	0.14	0.07409	0.469	0.5	0.004963	NA	NA	0	0.717	0.4	0.009601	0.606	0.53	0.002378	1.037	0.232	0.845	0.265	1.021	0.585	0.844	0.377	1.026	0.71	0.595	0.173
							exm1477276	rs151210184	284.787	NA	ZNF223	NS	0.196	0.075	0.00132538	0.198	0.077	0.00466	NA	NA	0	NA	NA	0	NA	NA	0	NA	NA	0	0.969	0.33	0.675	0.0463	0.945	0.159	0.613	0.0592	1.021	0.778	0.763	0.52
							exm1475881	NA	-255.735	NA	ETHE1	NS	>>	0.078	0	NA	NA	0	NA	NA	0	NA	NA	0	NA	NA	0	>>	0.07	0	1.656	0.24	1.656	0.24	1.039	0.953	1.039	0.953	2.13	0.316	2.13	0.316
							exm1476642	rs116523509	17.398	NA	LYPD5	NS	2.041	0.08	0.0010603	2.259	0.062	0.003262	NA	NA	0	NA	NA	0	0.597	0.78	0.000384	<<	0.53	0.0002973	0.987	0.706	1.345	0.441	0.982	0.676	1.299	0.6	1.002	0.978	0.659	0.684
							exm1476726	rs1061768	66.126	0.157	ZNF283	NS	0.925	0.082	0.142762	0.993	0.94	0.1365	0.654	0.061	0.103	0.993	0.95	0.09145	0.932	0.46	0.1595	0.874	0.087	0.2087	0.913	0.0158	0.855	0.345	0.91	0.0465	1.032	0.874	1.07	0.403	1.01	0.977
							exm1476351	rs140011964	-126.791	0.005	PLAUR	NS	2.759	0.084	0.000331345	<<	0.61	0.000233	NA	NA	0	NA	NA	0	NA	NA	0	3.283	0.054	0.001189	0.957	0.201	1.172	0.234	0.946	0.204	1.248	0.171	0.944	0.448	1.171	0.577
							exm1475650	rs148052365	-365.949	NA	TEX101	NS	4.351	0.086	0.000132538	<<	0.67	0.000233	NA	NA	0	7.393	0.049	0.0002485	NA	NA	0	NA	NA	0	0.993	0.917	0.578	0.256	0.974	0.773	0.461	0.279	0.971	0.855	1.793	0.339
							exm1476912	rs144209644	182.874	NA	ZNF221	NS	<<	0.088	0.000663042	<<	0.091	0.00233	NA	NA	0	NA	NA	0	NA	NA	0	NA	NA	0	0.988	0.46	0.921	0.564	0.985	0.493	0.978	0.899	0.935	0.0602	0.366	0.0221
							exm1476285	rs148068996	-158.209	NA	CADM4	NS	>>	0.093	0	NA	NA	0	NA	NA	0	NA	NA	0	>>	0.11	0	NA	NA	0	0.872	0.501	0.872	0.501	0.828	0.476	0.828	0.476	0.895	0.793	0.895	0.793
							exm1477177	rs73933984	249.679	NA	ZNF222	NS	0.728	0.094	0.0109344	0.703	0.072	0.03798	NA	NA	0	NA	NA	0	4.954	0.14	0.000384	<<	0.41	0.0002973	0.971	0.269	0.971	0.692	0.958	0.205	1.045	0.627	1.038	0.512	0.977	0.872
							exm1476435	NA	-62.787	NA	IRGC	NS	>>	0.13	0	NA	NA	0	NA	NA	0	NA	NA	0	NA	NA	0	>>	0.15	0	1.03	0.646	1.092	0.475	1.039	0.624	1.235	0.161	0.952	0.747	0.643	0.145
							exm1477112	rs73933979	228.315	NA	ZNF230	NS	0.752	0.14	0.0105368	0.726	0.11	0.03658	NA	NA	0	NA	NA	0	4.954	0.14	0.000384	<<	0.41	0.0002973	0.944	0.103	0.963	0.783	0.942	0.176	0.971	0.865	0.999	0.988	1.132	0.616
							exm1476168	rs137898797	-183.225	NA	ZNF576	NS	5.114	0.14	6.63042e-05	NA	NA	0	NA	NA	0	NA	NA	0	NA	NA	0	5.338	0.13	0.0002973	1.067	0.484	1.171	0.258	1.184	0.137	1.253	0.177	1.078	0.704	1.339	0.364
							exm1476478	NA	-48.649	NA	SMG9	NS	>>	0.18	0	NA	NA	0	NA	NA	0	NA	NA	0	NA	NA	0	>>	0.18	0	1.098	0.641	1.098	0.641	1.112	0.675	1.112	0.675	1.335	0.437	1.335	0.437
							exm1475927	rs145264344	-246.859	NA	ZNF575	NS	0.31	0.24	0.000662691	0.346	0.29	0.00233	NA	NA	0	NA	NA	0	NA	NA	0	NA	NA	0	0.31	0.239	0.31	0.239	<<	0.197	<<	0.197	1.137	0.905	1.137	0.905
							exm1476067	rs2682585	-205.225	0.002	LOC390940	NS	0.956	0.3	0.160194	0.916	0.31	0.1836	0.708	0.016	0.3022	0.981	0.85	0.09667	1.04	0.71	0.1206	1.002	0.98	0.203	0.956	0.298	NA	NA	0.982	0.739	NA	NA	0.976	0.799	NA	NA
							exm1475685	NA	-320.694	NA	LYPD3	NS	2.355	0.38	0.000132538	NA	NA	0	NA	NA	0	NA	NA	0	>>	0.13	0	1.403	0.79	0.0005945	0.921	0.759	0.921	0.759	0.79	0.513	0.79	0.513	1.267	0.618	1.267	0.618
							exm1476589	NA	-5.798	NA	KCNN4	NS	1.924	0.51	0.000132538	NA	NA	0	<<	0.46	0.001241	NA	NA	0	>>	0.025	0	<<	0.52	0.0002973	1.079	0.795	1.079	0.795	0.774	0.559	0.774	0.559	2.545	0.0211	2.545	0.0211
rs2284378	20	32588095	63	12	6	2	exm1535013	rs150066229	285.318	NA	AHCY	NS	4.608	0.014	0.000265076	3.239	0.11	0.000932	NA	NA	0	>>	0.84	0	NA	NA	0	>>	0.11	0	0.904	0.639	0.904	0.639	1.162	0.533	1.162	0.533	0.599	0.382	0.599	0.382
							exm1534368	rs146826289	-426.058	NA	CBFA2T2	NS	4.595	0.024	0.000198807	13.652	0.0028	0.000233	NA	NA	0	NA	NA	0	<<	0.33	0.000768	>>	0.14	0	0.862	0.3	0.862	0.3	0.797	0.222	0.797	0.222	1.155	0.6	1.155	0.6
							exm1534572	rs41301829	-330.891	NA	NECAB3	NS	4.595	0.024	0.000198807	13.652	0.0028	0.000233	NA	NA	0	NA	NA	0	<<	0.33	0.000768	>>	0.14	0	1.303	0.0782	1.303	0.0782	1.133	0.526	1.133	0.526	1.287	0.413	1.287	0.413
							exm1534531	rs7260921	-336.699	NA	C20orf144	NS	0.907	0.058	0.148018	0.891	0.11	0.3478	1.134	0.77	0.01985	1.004	0.98	0.03207	0.902	0.25	0.2127	1.107	0.75	0.01249	0.908	0.061	3.383	0.361	0.968	0.615	<<	0.679	0.836	0.0944	<<	0.792
							exm1534694	rs144533858	-255.085	NA	ZNF341	NS	3.65	0.06	0.000198807	NA	NA	0	NA	NA	0	>>	0.15	0	>>	0.14	0	2.053	0.37	0.0008918	0.956	0.671	0.956	0.671	0.797	0.134	0.797	0.134	1.222	0.293	1.222	0.293
							exm1534991	rs150347576	260.214	NA	ASIP	NS	>>	0.067	0	>>	0.057	0	NA	NA	0	NA	NA	0	NA	NA	0	NA	NA	0	1.045	0.652	>>	0.0665	0.949	0.673	NA	NA	0.966	0.898	>>	0.00125
							exm1534609	rs3213173	-322.849	NA	E2F1	NS	0.588	0.068	0.00550033	0.585	0.075	0.01887	NA	NA	0	NA	NA	0	2.325	0.54	0.000384	<<	0.28	0.0002973	0.894	0.316	0.728	0.105	0.877	0.348	0.87	0.554	0.76	0.29	0.547	0.187
							exm1534667	rs144374358	-285.584	NA	PXMP4	NS	0.548	0.14	0.00291584	0.496	0.1	0.01025	NA	NA	0	NA	NA	0	>>	0.15	0	NA	NA	0	0.96	0.199	0.781	0.161	0.995	0.904	0.717	0.151	0.914	0.22	0.699	0.396
							exm1534551	rs147746551	-332.654	0.002	C20orf134	NS	0.522	0.23	0.00119284	1.185	0.88	0.000699	NA	NA	0	NA	NA	0	0.44	0.44	0.00192	0.487	0.35	0.002973	1.092	0.677	1.092	0.677	1.038	0.893	1.038	0.893	1.264	0.56	1.264	0.56
							exm1535104	rs144293716	408.464	NA	ITCH	NS	1.848	0.31	0.000530152	1.872	0.3	0.001864	NA	NA	0	NA	NA	0	NA	NA	0	NA	NA	0	1.59	0.439	1.59	0.439	2.201	0.23	2.201	0.23	2.038	0.495	2.038	0.495
							exm1963235	rs114047864	73.339	NA	RALY	NS	0.547	0.34	0.000861498	NA	NA	0	NA	NA	0	0.547	0.35	0.003231	NA	NA	0	NA	NA	0	0.973	0.695	0.906	0.538	1.057	0.507	0.915	0.664	1.071	0.66	0.976	0.942
							exm1534974	rs17856024	97.13	NA	EIF2S2	NS	1.002	0.99	0.00742213	0.947	0.8	0.02493	3.399	0.31	0.001241	NA	NA	0	0.735	0.76	0.001152	1.403	0.82	0.0002973	1.002	0.994	1.002	0.994	1.078	0.768	1.078	0.768	0.984	0.968	0.984	0.968
rs2823093	21	16520832	33	1	0	0	exm1562686	rs143359165	-182.869	NA	NRIP1	NS	12.236	0.00013	0.000132538	10.196	0.00067	0.000466	NA	NA	0	NA	NA	0	>>	0.18	0	NA	NA	0	1.134	0.00096	1.056	0.464	1.084	0.0929	1.096	0.312	1.182	0.0512	0.995	0.978
rs132390	22	29621477	106	17	41	5	exm1597604	NA	-87.982	NA	KREMEN1	NS	>>	0.0015	0	>>	0.0025	0	NA	NA	0	NA	NA	0	NA	NA	0	NA	NA	0	0.989	0.784	1.017	0.909	0.941	0.245	1.078	0.685	1.04	0.673	0.883	0.717
							exm1598252	rs148653339	260.32	NA	NEFH	NS	>>	0.0066	0	NA	NA	0	NA	NA	0	NA	NA	0	>>	0.14	0	>>	0.022	0	0.924	0.13	0.791	0.367	0.911	0.156	0.801	0.514	0.901	0.37	1.122	0.823
							exm1597553	rs41281607	-165.01	NA	C22orf31	NS	1.762	0.0079	0.00344599	7.71	0.0001	0.000932	0.918	0.95	0.002481	>>	0.28	0	1.389	0.4	0.006528	1.437	0.23	0.008621	1.125	0.00451	1.381	0.0184	1.116	0.0333	1.232	0.226	1.296	0.00455	1.343	0.324
							exm1597681	rs76367973	6.783	0	EMID1	NS	1.372	0.06	0.00636183	1.623	0.25	0.004427	2.371	0.29	0.003722	NA	NA	0	1.521	0.13	0.01114	1.159	0.57	0.01338	0.988	0.663	1.207	0.147	0.988	0.717	1.233	0.19	0.975	0.68	1.42	0.161
							exm1597977	rs9613860	86.478	0.008	GAS2L1	NS	0.922	0.071	0.143776	0.872	0.4	0.04706	0.764	0.12	0.1617	0.87	0.077	0.1924	0.89	0.18	0.2158	1.093	0.31	0.1489	0.926	0.0689	0.949	0.731	0.904	0.0544	1.005	0.977	0.881	0.194	0.701	0.304
							exm1598397	rs35832657	291.801	0	THOC5	NS	0.468	0.086	0.00185553	0.864	0.9	0.000932	<<	0.33	0.002481	NA	NA	0	1.915	0.51	0.000768	0.296	0.038	0.005945	0.974	0.432	0.897	0.467	0.972	0.489	0.95	0.777	0.902	0.176	0.562	0.166
							exm1598050	rs145640648	113.579	0	AP1B1	NS	<<	0.095	0.000463883	<<	0.28	0.000699	NA	NA	0	NA	NA	0	<<	0.32	0.000768	<<	0.35	0.0005945	0.792	0.235	0.792	0.235	0.765	0.281	0.765	0.281	0.645	0.386	0.645	0.386
							exm1597520	NA	-174.574	NA	ZNRF3	NS	3.103	0.099	0.000265111	3.962	0.14	0.0004662	NA	NA	0	NA	NA	0	<<	0.56	0.000384	4.01	0.22	0.0002973	1.024	0.944	1.024	0.944	1.03	0.945	1.03	0.945	1.092	0.905	1.092	0.905
							exm1598563	rs141538143	452.712	NA	NF2	NS	0.234	0.13	0.000994036	0.243	0.14	0.003495	NA	NA	0	NA	NA	0	NA	NA	0	NA	NA	0	0.956	0.879	0.956	0.879	0.746	0.47	0.746	0.47	1.674	0.327	1.674	0.327
							exm1597750	NA	35.055	NA	RHBDD3	NS	>>	0.18	0	NA	NA	0	NA	NA	0	NA	NA	0	NA	NA	0	>>	0.2	0	0.973	0.853	0.973	0.853	1.044	0.815	1.044	0.815	0.835	0.585	0.835	0.585
							exm1598175	rs142648482	213.664	NA	RFPL1	NS	1.862	0.25	0.000662691	1.488	0.5	0.00233	NA	NA	0	NA	NA	0	>>	0.11	0	NA	NA	0	0.994	0.969	1.257	0.586	0.858	0.44	1.2	0.741	1.337	0.251	0.83	0.856
							exm1598478	NA	335.33	NA	NIPSNAP1	NS	<<	0.25	0.000198807	<<	0.59	0.000233	NA	NA	0	NA	NA	0	NA	NA	0	<<	0.31	0.0005945	<<	0.252	<<	0.252	<<	0.385	<<	0.385	<<	0.643	<<	0.643
							exm1597265	rs17883862	-491.021	NA	CHEK2	NS	0.671	0.34	0.0023879	0.738	0.47	0.007922	NA	NA	0	NA	NA	0	<<	0.52	0.000384	<<	0.49	0.0002976	0.983	0.945	0.983	0.945	1.253	0.426	1.253	0.426	0.795	0.699	0.795	0.699
							exm1597321	rs142089992	-451.748	0	CCDC117	NS	1.457	0.43	0.000795229	3.483	0.19	0.000466	NA	NA	0	NA	NA	0	1.15	0.87	0.001536	1.13	0.86	0.001784	1.081	0.728	1.081	0.728	1.057	0.841	1.057	0.841	0.725	0.589	0.725	0.589
							exm1597302	rs150518681	-479.571	NA	HSCB	NS	<<	0.5	0.000132538	<<	0.47	0.000466	NA	NA	0	NA	NA	0	NA	NA	0	NA	NA	0	1.03	0.816	0.971	0.966	0.948	0.751	1.734	0.418	0.967	0.895	<<	0.477
							exm1597878	rs41311143	72.438	0	EWSR1	NS	1.115	0.57	0.00583168	1.031	0.94	0.005126	2.804	0.17	0.003722	1.451	0.8	0.0002485	1.278	0.52	0.006912	0.919	0.77	0.01308	1.082	0.665	1.082	0.665	0.967	0.887	0.967	0.887	1.021	0.958	1.021	0.958
							exm1597393	rs5762809	-424.983	0.001	XBP1	NS	0.987	0.79	0.113543	1.28	0.17	0.03075	0.83	0.37	0.1055	0.975	0.73	0.2089	0.841	0.18	0.08993	1.081	0.4	0.1255	0.987	0.789	NA	NA	0.984	0.786	NA	NA	1.271	0.0292	NA	NA
rs6001930	22	40876234	117	10	34	2	exm1610597	rs115365592	-460.911	NA	FAM83F	NS	4.471	0.0059	0.000331345	3.61	0.032	0.001165	NA	NA	0	NA	NA	0	>>	0.066	0	NA	NA	0	0.945	0.153	1.018	0.904	0.949	0.293	1.121	0.529	0.916	0.32	1.085	0.782
							exm1611195	rs115175354	-61.692	0.012	MKL1	NS	0.532	0.014	0.00722333	0.498	0.015	0.0233	<<	0.47	0.001241	NA	NA	0	0.638	0.53	0.002688	1.608	0.75	0.0002973	0.979	0.513	0.81	0.0496	0.98	0.62	0.728	0.0285	0.955	0.528	1.015	0.943
							exm1610898	rs11089991	-125.945	NA	ADSL	NS	1.342	0.038	0.012326	1.353	0.039	0.04194	NA	NA	0	NA	NA	0	1.959	0.33	0.001536	<<	0.3	0.0005945	1.379	0.0088	1.462	0.108	1.546	0.00369	1.664	0.0707	1.405	0.136	1.775	0.16
							exm1611393	rs149604804	201.661	0.035	MCHR1	NS	1.665	0.073	0.0019218	3.449	0.067	0.000932	1.899	0.65	0.001241	NA	NA	0	1.51	0.42	0.003456	1.483	0.34	0.004459	1.068	0.343	1.047	0.634	1.023	0.796	0.954	0.703	1.003	0.986	1.274	0.213
							exm1611015	NA	-74.119	NA	SGSM3	NS	>>	0.079	0	NA	NA	0	NA	NA	0	>>	0.055	0	NA	NA	0	NA	NA	0	0.978	0.875	0.978	0.875	1.057	0.748	1.057	0.748	1.207	0.552	1.207	0.552
							exm1610722	NA	-215.129	NA	TNRC6B	NS	1.92	0.13	0.000795229	NA	NA	0	NA	NA	0	2.066	0.12	0.002485	<<	0.45	0.000384	2.801	0.45	0.0002973	0.953	0.465	0.923	0.518	1.011	0.893	0.946	0.722	0.875	0.381	0.847	0.539
							exm1611535	rs140925863	381.235	NA	DNAJB7	NS	2.648	0.14	0.000331345	2.694	0.13	0.001165	NA	NA	0	NA	NA	0	NA	NA	0	NA	NA	0	1.027	0.727	0.984	0.903	1.042	0.665	0.924	0.65	1.02	0.914	1.111	0.694
							exm2012110	rs140879743	290.621	NA	SLC25A17	NS	0.539	0.26	0.00112657	NA	NA	0	NA	NA	0	0.539	0.27	0.004225	NA	NA	0	NA	NA	0	0.899	0.596	0.899	0.596	0.897	0.674	0.897	0.674	1.194	0.632	1.194	0.632
							exm1611573	NA	401.746	NA	XPNPEP3	NS	<<	0.48	6.62691e-05	NA	NA	0	NA	NA	0	NA	NA	0	NA	NA	0	<<	0.49	0.0002973	1.033	0.936	1.033	0.936	0.793	0.673	0.793	0.673	1.331	0.701	1.331	0.701
							exm1611462	rs144283288	346.972	NA	ST13	NS	0.896	0.59	0.00822281	0.852	0.47	0.02709	<<	0.45	0.001241	NA	NA	0	1.804	0.36	0.00192	<<	0.24	0.0005945	0.885	0.542	0.885	0.542	0.7	0.214	0.7	0.214	1.322	0.414	1.322	0.414
S6.2 High Risk Genes Breast
		Gene Sum Analysis
		Overall				ER+				ER-									Single Marker Analysis
		All Variants		Rare Variants		All Variants		Rare Variants		All Variants		Rare Variants							Overall			African American			Native Hawaiian			Japanese American			Latino			European American
Gene	No. of SNPs	OR	P	OR	P	OR	P	OR	P	OR	P	OR	P	SNP ID	rs ID	Chr	Location	Type	OR	P	MAF	OR	P	MAF	OR	P	MAF	OR	P	MAF	OR	P	MAF	OR	P	MAF
ATM	62	0.955	0.153	0.935	0.198	0.955	0.25	0.965	0.582	0.943	0.381	0.848	0.152	exm953837	rs56009889	11	108196896	NS:L2307F	4.133	0.0065	0.000331345	<<	0.64	0.000233	NA	NA	0	NA	NA	0	<<	0.37	0.000768	9.805	0.00041	0.0005945
														exm1693690	NA	11	108098555	NS:H42R	5.905	0.017	0.000132538	NA	NA	0	NA	NA	0	5.685	0.021	0.000497	NA	NA	0	NA	NA	0
														exm953535	rs150143957	11	108098561	NS:D44G	>>	0.048	0	>>	0.06	0	NA	NA	0	NA	NA	0	NA	NA	0	NA	NA	0
														exm953608	rs2227924	11	108122592	NS:L546V	1.326	0.051	0.0117959	1.367	0.04	0.03868	NA	NA	0	NA	NA	0	0.901	0.85	0.004224	<<	0.53	0.0002973
														exm953633	rs147934285	11	108124738	NS:E699G	3.065	0.067	0.000331609	3.43	0.068	0.000932	NA	NA	0	NA	NA	0	2.306	0.54	0.000384	NA	NA	0
														exm953548	rs2234997	11	108106443	NS:D126E	0.861	0.071	0.0573303	0.882	0.15	0.1893	1.771	0.58	0.002481	>>	0.62	0	0.524	0.068	0.01536	1.029	0.96	0.00327
														exm953721	rs141921797	11	108158415	NS:Q1361R	<<	0.12	0.000597055	<<	0.12	0.0021	NA	NA	0	NA	NA	0	NA	NA	0	NA	NA	0
														exm953829	rs138828590	11	108192118	NS:E2181D	<<	0.12	0.000662691	<<	0.11	0.00233	NA	NA	0	NA	NA	0	NA	NA	0	NA	NA	0
														exm953620	rs2227922	11	108123551	NS:P604S	0.645	0.13	0.00397614	0.909	0.82	0.006291	<<	0.5	0.001241	<<	0.32	0.0002485	0.532	0.19	0.00768	0.59	0.42	0.00327
														exm953912	rs139379666	11	108235879	NS:P2974L	0.445	0.13	0.00145792	NA	NA	0	NA	NA	0	0.456	0.15	0.005219	<<	0.18	0.000384	NA	NA	0
														exm953581	rs28904919	11	108117787	NS:S333F	1.949	0.14	0.000729056	<<	0.39	0.000699	>>	0.16	0	NA	NA	0	1.475	0.51	0.002688	8.555	0.028	0.0002973
														exm953816	rs1800060	11	108188136	NS:V2079I	0.695	0.15	0.00616302	0.737	0.26	0.01957	NA	NA	0	<<	0.53	0.0002485	<<	0.3	0.001152	0.836	0.83	0.001486
														exm953634	rs4986761	11	108124761	NS:S707P	0.733	0.17	0.0055666	0.558	0.44	0.002796	0.809	0.86	0.003722	<<	0.13	0.000497	0.819	0.62	0.008833	0.803	0.47	0.01308
														exm953822	rs56815840	11	108190770	NS:S2146T	0.675	0.2	0.0045756	0.694	0.23	0.01586	NA	NA	0	NA	NA	0	<<	0.55	0.000384	NA	NA	0
														exm953841	rs4988111	11	108198391	NS:L2332P	0.74	0.2	0.00656064	0.796	0.37	0.0205	NA	NA	0	NA	NA	0	0.544	0.37	0.00384	<<	0.53	0.0002973
														exm953731	rs1800058	11	108160350	NS:L1420F	1.25	0.21	0.00624004	1.49	0.3	0.005128	4.708	0.17	0.001241	NA	NA	0	2.003	0.11	0.004231	1.001	1	0.01784
														exm953591	rs56128736	11	108119823	NS:V410A	0.612	0.22	0.00178926	<<	0.4	0.000699	1.045	0.97	0.002481	<<	0.23	0.0002485	0.558	0.38	0.00384	0.781	0.68	0.00327
														exm953582	rs138398778	11	108117798	NS:R337C	3.827	0.24	6.62778e-05	NA	NA	0	NA	NA	0	NA	NA	0	NA	NA	0	4.096	0.22	0.0002973
														exm953574	rs56123940	11	108115601	NS:R250Q	<<	0.25	0.000198807	NA	NA	0	NA	NA	0	<<	0.41	0.0002485	NA	NA	0	<<	0.4	0.0005945
														exm953809	rs145847315	11	108186631	NS:I2030V	1.308	0.26	0.00457256	1.286	0.3	0.01561	NA	NA	0	NA	NA	0	1.165	0.9	0.000768	>>	0.24	0
														exm953757	rs140856217	11	108164137	NS:V1570A	2.615	0.28	0.000198886	1.154	0.9	0.0006996	NA	NA	0	NA	NA	0	NA	NA	0	>>	0.063	0
														exm953828	rs146243469	11	108192112	NS:I2179M	<<	0.28	0.000265076	<<	0.26	0.000932	NA	NA	0	NA	NA	0	NA	NA	0	NA	NA	0
														exm953770	rs55870064	11	108168053	NS:N1650S	1.484	0.3	0.00119284	2.868	0.44	0.000233	6.334	0.073	0.001241	1.212	0.68	0.003728	NA	NA	0	<<	0.44	0.0002973
														exm953733	NA	11	108160416	NS:Y1442H	<<	0.31	0.000198833	<<	0.65	0.000233	NA	NA	0	NA	NA	0	NA	NA	0	<<	0.37	0.0005945
														exm953859	rs55801750	11	108201023	NS:C2464R	<<	0.31	0.000132785	NA	NA	0	NA	NA	0	NA	NA	0	NA	NA	0	<<	0.32	0.0005959
														exm953802	NA	11	108181014	NS:K1964E	<<	0.34	0.000132538	NA	NA	0	NA	NA	0	NA	NA	0	<<	0.4	0.000768	NA	NA	0
														exm953712	rs149711770	11	108155132	NS:A1309T	0.499	0.37	0.000596422	1.65	0.68	0.000466	<<	0.32	0.002481	NA	NA	0	<<	0.42	0.000384	0.431	0.44	0.001189
														exm953724	rs3092856	11	108159732	NS:H1380Y	0.913	0.37	0.0298211	0.985	0.91	0.06594	<<	0.054	0.006203	0.9	0.53	0.03479	0.435	0.13	0.007296	1.569	0.61	0.0008918
														exm953898	NA	11	108216611	NS:R2854C	2.413	0.37	0.000132538	NA	NA	0	NA	NA	0	NA	NA	0	<<	0.33	0.000768	>>	0.013	0
														exm953808	rs11212587	11	108186610	NS:G2023R	0.585	0.41	0.00072896	NA	NA	0	NA	NA	0	NA	NA	0	0.383	0.37	0.00192	0.717	0.68	0.001784
														exm953843	rs3092831	11	108198400	NS:T2335I	2.074	0.42	0.00019886	1.152	0.9	0.0006996	NA	NA	0	NA	NA	0	>>	0.37	0	NA	NA	0
														exm953849	rs149827260	11	108199832	NS:R2392W	2.08	0.42	0.000198833	1.158	0.9	0.000699	NA	NA	0	NA	NA	0	>>	0.37	0	NA	NA	0
														exm953684	rs1800057	11	108143456	NS:P1054R	0.897	0.48	0.0107356	1.324	0.44	0.006524	0.51	0.54	0.004963	0.275	0.24	0.000994	0.495	0.044	0.01613	1.046	0.82	0.02497
														exm953740	rs138327406	11	108160480	NS:F1463C	1.514	0.48	0.000464129	NA	NA	0	NA	NA	0	NA	NA	0	2.019	0.38	0.001153	1.193	0.84	0.00119
														exm953813	rs144761622	11	108186818	NS:T2059I	0.727	0.48	0.0019218	0.807	0.64	0.006291	NA	NA	0	NA	NA	0	<<	0.35	0.000768	NA	NA	0
														exm953657	rs61734354	11	108138039	NS:N870D	0.594	0.49	0.000927767	0.594	0.49	0.003262	NA	NA	0	NA	NA	0	NA	NA	0	NA	NA	0
														exm953799	rs147187700	11	108180945	NS:V1941L	<<	0.49	6.62691e-05	NA	NA	0	NA	NA	0	NA	NA	0	NA	NA	0	<<	0.47	0.0002973
														exm953645	rs34231402	11	108128246	NS:F763L	0.73	0.5	0.00132538	1.528	0.61	0.001165	NA	NA	0	NA	NA	0	0.436	0.27	0.00384	0.923	0.92	0.001486
														exm953583	NA	11	108117799	NS:R337H	2.359	0.53	6.62691e-05	NA	NA	0	NA	NA	0	NA	NA	0	NA	NA	0	2.227	0.56	0.0002973
														exm953673	rs146145357	11	108141983	NS:V976A	<<	0.53	6.62691e-05	<<	0.58	0.000233	NA	NA	0	NA	NA	0	NA	NA	0	NA	NA	0
														exm953605	rs2235000	11	108121733	NS:G514D	0.924	0.56	0.0180252	0.98	0.89	0.05895	NA	NA	0	>>	0.65	0	0.235	0.038	0.006528	2.441	0.35	0.0005945
														exm953790	rs1801673	11	108175463	NS:D1853V	0.859	0.56	0.0029968	<<	0.22	0.001167	1.33	0.68	0.004988	NA	NA	0	1.152	0.77	0.004241	0.747	0.43	0.007553
														exm953921	NA	11	108236150	NS:G3029D	2.123	0.59	6.62691e-05	NA	NA	0	NA	NA	0	NA	NA	0	NA	NA	0	2.25	0.56	0.0002973
														exm953542	rs142358238	11	108100039	NS:C107Y	0.725	0.61	0.000927767	0.794	0.72	0.003029	NA	NA	0	NA	NA	0	<<	0.44	0.000384	NA	NA	0
														exm953789	rs1801516	11	108175462	NS:D1853N	1.034	0.62	0.0548045	0.91	0.62	0.03332	1.161	0.63	0.03598	1.064	0.95	0.0007455	1.036	0.79	0.07604	1.066	0.48	0.135
														exm953650	rs3218695	11	108129778	NS:D814E	0.902	0.64	0.00662691	0.9	0.67	0.02097	1.182	0.92	0.001241	NA	NA	0	0.685	0.6	0.003072	1.367	0.83	0.0002973
														exm953647	rs641252	11	108128319	NS:S788R	1.14	0.7	0.00245195	1.196	0.6	0.008388	NA	NA	0	NA	NA	0	<<	0.5	0.000384	NA	NA	0
														exm953694	rs56398245	11	108150316	NS:Q1128R	0.922	0.7	0.00689198	0.984	0.94	0.02167	<<	0.42	0.001241	NA	NA	0	0.376	0.21	0.003456	3.849	0.25	0.0002973
														exm953545	rs146382972	11	108106399	NS:A112T	0.824	0.73	0.00112687	0.893	0.84	0.003731	NA	NA	0	NA	NA	0	<<	0.44	0.000384	NA	NA	0
														exm953656	rs1800056	11	108138003	NS:F858L	0.926	0.73	0.00510272	1.612	0.34	0.003029	<<	0.32	0.002481	1.205	0.9	0.0002485	0.672	0.44	0.006144	0.895	0.7	0.01338
														exm953775	rs1800059	11	108170506	NS:S1691R	0.817	0.73	0.000795229	2.004	0.57	0.000466	NA	NA	0	NA	NA	0	NA	NA	0	0.694	0.58	0.002973
														exm953840	rs148432863	11	108198384	NS:L2330V	0.766	0.74	0.000530152	0.947	0.95	0.001631	NA	NA	0	NA	NA	0	<<	0.49	0.000384	NA	NA	0
														exm2274528	NA	11	108192078	NS:S2168L	0.69	0.75	0.000198807	NA	NA	0	<<	0.47	0.001241	1.187	0.89	0.000497	NA	NA	0	NA	NA	0
														exm953546	rs148590073	11	108106435	NS:I124V	1.107	0.79	0.00198834	0.929	0.86	0.00676	NA	NA	0	NA	NA	0	5.222	0.14	0.000384	NA	NA	0
														exm953676	rs146531614	11	108142070	NS:N1005S	1.396	0.79	0.000132538	<<	0.64	0.000233	NA	NA	0	NA	NA	0	NA	NA	0	2.691	0.47	0.0002973
														exm953674	rs139552233	11	108141988	NS:S978P	1.285	0.84	0.000132556	NA	NA	0	NA	NA	0	NA	NA	0	2.022	0.61	0.000384	<<	0.59	0.0002973
														exm953745	rs34640941	11	108160516	NS:Y1475C	1.269	0.85	0.000132538	<<	0.6	0.000233	NA	NA	0	NA	NA	0	NA	NA	0	1.91	0.64	0.0002973
														exm953855	rs147604227	11	108200946	NS:T2438I	0.925	0.91	0.00072896	1.037	0.96	0.00233	NA	NA	0	NA	NA	0	<<	0.44	0.000384	NA	NA	0
														exm953537	rs1800054	11	108098576	NS:S49C	1.022	0.92	0.0045063	1.769	0.31	0.002097	0.706	0.76	0.003722	>>	0.092	0	1.992	0.18	0.003072	0.731	0.29	0.01427
														exm953559	rs3218707	11	108114727	NS:V182L	1.017	0.93	0.00722524	0.829	0.45	0.02146	<<	0.43	0.001241	NA	NA	0	1.914	0.12	0.004608	1.888	0.41	0.001189
														exm953679	rs3092857	11	108143299	NS:M1040V	1.012	0.94	0.0111347	1.019	0.91	0.0366	2.22	0.58	0.001241	>>	0.62	0	1.504	0.56	0.002304	<<	0.15	0.001189
														exm953614	rs2235006	11	108122700	NS:F582L	1.029	0.96	0.00072896	<<	0.43	0.000466	NA	NA	0	NA	NA	0	0.98	0.98	0.001536	1.217	0.79	0.001486
BRCA1	42	1.012	0.16	0.927	0.298	1.008	0.418	0.893	0.222	1.048	0.0139	0.969	0.841	exm1326706	rs80357090	17	41249283	NS:V191I	>>	0.018	0	>>	0.069	0	>>	0.16	0	NA	NA	0	NA	NA	0	NA	NA	0
														exm1326708	rs55688530	17	41249297	NS:S186Y	0.339	0.031	0.00271703	0.274	0.021	0.009087	NA	NA	0	NA	NA	0	2.505	0.53	0.000384	<<	0.47	0.0002973
														exm1326503	rs56195342	17	41215385	NS:T616A	<<	0.1	0.000331389	NA	NA	0	NA	NA	0	NA	NA	0	<<	0.14	0.00192	NA	NA	0
														exm1326601	rs16941	17	41244435	NS:E991G	1.055	0.11	0.290423	1.072	0.41	0.1842	1.015	0.91	0.3853	1.041	0.52	0.336	1.039	0.6	0.3176	1.081	0.25	0.3277
														exm1326663	rs55906931	17	41246092	NS:F439L	<<	0.12	0.000331345	<<	0.44	0.000466	NA	NA	0	NA	NA	0	<<	0.13	0.000768	<<	0.46	0.0002973
														exm1326638	rs4986850	17	41245471	NS:D646N	1.131	0.13	0.0335366	1.269	0.19	0.02703	1.739	0.17	0.01861	0.235	0.19	0.000994	1.185	0.32	0.03843	1.044	0.7	0.08056
														exm1326620	rs28897682	17	41245120	NS:N763Y	5.225	0.14	6.63746e-05	>>	0.044	0	NA	NA	0	NA	NA	0	>>	0.14	0	<<	0.45	0.0002973
														exm1326567	rs28897686	17	41243800	NS:E1203K	4.916	0.15	6.62691e-05	NA	NA	0	NA	NA	0	NA	NA	0	<<	0.46	0.000384	>>	0.029	0
														exm1326652	rs56012641	17	41245900	NS:N503H	<<	0.15	0.000265076	<<	0.63	0.000233	NA	NA	0	NA	NA	0	<<	0.13	0.000768	<<	0.46	0.0002973
														exm1326710	rs56187033	17	41251803	NS:Y179C	<<	0.15	0.000265111	<<	0.63	0.0002331	NA	NA	0	NA	NA	0	<<	0.13	0.000768	<<	0.46	0.0002973
														exm1326521	rs1799966	17	41223094	NS:S509G	1.047	0.17	0.308391	1.045	0.57	0.2386	1.015	0.91	0.3871	1.048	0.46	0.3365	1.033	0.66	0.3257	1.068	0.33	0.3316
														exm1326586	rs16942	17	41244000	NS:K1136R	1.047	0.17	0.306933	1.048	0.54	0.2339	1.029	0.82	0.3883	1.041	0.52	0.336	1.035	0.64	0.326	1.067	0.33	0.3311
														exm1326554	rs28897689	17	41243509	NS:R1300G	0.65	0.2	0.0027833	<<	0.074	0.002796	2.164	0.6	0.001241	NA	NA	0	0.684	0.74	0.001152	0.781	0.53	0.007729
														exm1326613	rs799917	17	41244936	NS:P824L	1.044	0.2	0.471438	1.057	0.51	0.7726	1.027	0.83	0.397	1.042	0.51	0.3362	1.026	0.73	0.3675	1.052	0.44	0.3472
														exm1326662	rs28897676	17	41246062	NS:R449C	4.4	0.2	6.62691e-05	NA	NA	0	NA	NA	0	NA	NA	0	1.873	0.65	0.000384	>>	0.052	0
														exm1326602	rs1800704	17	41244524	NS:M961I	0.615	0.28	0.00139165	<<	0.46	0.000466	NA	NA	0	NA	NA	0	1.192	0.74	0.003456	0.218	0.11	0.002973
														exm1326619	rs56082113	17	41245090	NS:K773E	1.183	0.34	0.00874751	1.192	0.35	0.02936	>>	0.2	0	NA	NA	0	1.299	0.72	0.00192	<<	0.44	0.0002973
														exm1326610	rs4986847	17	41244775	NS:I878L	<<	0.35	0.000198807	<<	0.34	0.000699	NA	NA	0	NA	NA	0	NA	NA	0	NA	NA	0
														exm1326661	rs28897677	17	41246061	NS:R449H	<<	0.42	6.62691e-05	NA	NA	0	NA	NA	0	NA	NA	0	NA	NA	0	<<	0.41	0.0002973
														exm1326698	rs28897675	17	41246812	NS:L246V	2.711	0.46	6.62691e-05	NA	NA	0	NA	NA	0	NA	NA	0	NA	NA	0	3.438	0.35	0.0002973
														exm1326595	rs80357815	17	41244252	NS:P1052L	2.764	0.47	6.62691e-05	<<	0.62	0.000233	NA	NA	0	NA	NA	0	NA	NA	0	>>	0.17	0
														exm1326514	rs1799967	17	41222975	NS:M548I	0.863	0.49	0.00550033	1.416	0.51	0.003029	2.143	0.59	0.001241	NA	NA	0	0.224	0.029	0.006528	0.99	0.97	0.01546
														exm1326520	rs70953660	17	41223091	NS:P510S	1.597	0.5	0.000463945	1.54	0.53	0.001631	NA	NA	0	NA	NA	0	NA	NA	0	NA	NA	0
														exm1326626	rs80357467	17	41245233	NS:V725A	<<	0.5	6.62691e-05	NA	NA	0	NA	NA	0	NA	NA	0	NA	NA	0	<<	0.53	0.0002973
														exm1326516	rs4986854	17	41223048	NS:M524T	0.871	0.52	0.0055666	NA	NA	0	<<	0.44	0.001241	0.883	0.58	0.02038	NA	NA	0	2.826	0.45	0.0002973
														exm1326621	rs55746541	17	41245136	NS:Q757H	<<	0.57	6.62691e-05	NA	NA	0	NA	NA	0	NA	NA	0	NA	NA	0	<<	0.58	0.0002973
														exm1326623	rs41286298	17	41245180	NS:T743A	1.897	0.6	0.000132538	1.885	0.6	0.000466	NA	NA	0	NA	NA	0	NA	NA	0	NA	NA	0
														exm1326676	rs56128296	17	41246411	NS:I332M	0.786	0.6	0.00165673	0.6	0.34	0.005592	NA	NA	0	NA	NA	0	0.434	0.69	0.000384	>>	0.27	0
														exm1326534	rs1800744	17	41226488	NS:S408I	1.203	0.61	0.00152419	6.186	0.097	0.000233	<<	0.51	0.001241	>>	0.25	0	1.544	0.63	0.001152	0.917	0.85	0.005351
														exm1326603	rs56321129	17	41244526	NS:M961V	1.32	0.61	0.000795334	1.326	0.63	0.002563	NA	NA	0	NA	NA	0	0.582	0.72	0.0003843	NA	NA	0
														exm1326507	rs55770810	17	41215948	NS:R595W	<<	0.63	6.62691e-05	<<	0.64	0.000233	NA	NA	0	NA	NA	0	NA	NA	0	NA	NA	0
														exm1887836	rs80357459	17	41244465	NS:R981H	0.716	0.77	0.000265076	>>	0.048	0	NA	NA	0	NA	NA	0	<<	0.21	0.001536	NA	NA	0
														exm1326680	rs80357796	17	41246481	NS:Q309R	0.973	0.78	0.0269715	0.999	1	0.01678	1.063	0.9	0.01613	0.711	0.79	0.000497	1.187	0.36	0.03303	0.863	0.25	0.06956
														exm1326631	rs4986845	17	41245381	NS:N676D	0.898	0.82	0.00145792	0.972	0.95	0.004893	NA	NA	0	NA	NA	0	<<	0.47	0.000384	NA	NA	0
														exm1326532	rs55815649	17	41226423	NS:V430M	0.911	0.83	0.001723	0.78	0.62	0.005592	NA	NA	0	NA	NA	0	2.081	0.6	0.000384	2.635	0.48	0.0002973
														exm1326600	rs4986852	17	41244429	NS:S993N	1.014	0.93	0.00848244	0.873	0.77	0.005359	0.213	0.12	0.009926	<<	0.29	0.0002485	1.134	0.68	0.01229	1.11	0.63	0.01902
														exm1887833	rs80357272	17	41244100	NS:P1103S	0.913	0.94	0.000198807	NA	NA	0	NA	NA	0	0.93	0.95	0.0007455	NA	NA	0	NA	NA	0
														exm1326594	rs41293447	17	41244246	NS:S1054N	1.082	0.95	0.000132538	NA	NA	0	NA	NA	0	NA	NA	0	<<	0.43	0.000384	2.784	0.45	0.0002973
														exm1326571	rs28897687	17	41243840	NS:N1189K	1.037	0.97	0.000265076	NA	NA	0	NA	NA	0	NA	NA	0	>>	0.038	0	<<	0.14	0.001189
														exm1326666	rs55720177	17	41246121	NS:H429R	1.017	0.98	0.000662691	0.706	0.65	0.00233	NA	NA	0	NA	NA	0	>>	0.13	0	NA	NA	0
														exm1326526	rs56119278	17	41223240	NS:L460P	0.979	0.99	0.000265076	1.009	0.99	0.000932	NA	NA	0	NA	NA	0	NA	NA	0	NA	NA	0
														exm1326617	rs1800709	17	41245027	NS:R794W	0.994	0.99	0.00072896	>>	0.012	0	NA	NA	0	NA	NA	0	0.762	0.81	0.001152	0.5	0.37	0.002378
BRCA2	80	0.988	0.619	0.946	0.21	0.999	0.973	0.938	0.262	0.922	0.131	0.912	0.328	exm1061931	rs1799944	13	32911463	NS:N991D	0.833	0.0046	0.070851	1.249	0.16	0.04031	0.672	0.2	0.04839	0.788	0.012	0.1327	0.824	0.2	0.06989	0.763	0.12	0.04194
														exm1062203	rs1801426	13	32972884	NS:I3412V	1.21	0.011	0.0451292	1.28	0.024	0.0925	1.573	0.22	0.01861	1.251	0.23	0.02063	1.094	0.52	0.06528	0.838	0.7	0.004756
														exm1062024	rs79538375	13	32914277	NS:I1929V	0.487	0.035	0.00344782	NA	NA	0	0.933	0.96	0.002481	0.447	0.033	0.01195	<<	0.14	0.000384	2.654	0.48	0.0002973
														exm1062037	rs34309943	13	32914712	NS:H2074N	0.424	0.098	0.00218688	0.344	0.066	0.007456	NA	NA	0	NA	NA	0	0.5	0.68	0.000384	NA	NA	0
														exm1061960	rs56248502	13	32912582	NS:I1364L	0.613	0.11	0.00483828	0.654	0.16	0.01678	<<	0.52	0.001241	NA	NA	0	NA	NA	0	NA	NA	0
														exm1062132	rs11571747	13	32945172	NS:E2856A	0.326	0.12	0.00092789	<<	0.37	0.000699	NA	NA	0	NA	NA	0	NA	NA	0	0.382	0.2	0.00327
														exm1061881	rs28897708	13	32907129	NS:I505T	<<	0.13	0.000331389	NA	NA	0	NA	NA	0	NA	NA	0	<<	0.49	0.000384	<<	0.15	0.001189
														exm1062047	rs11571659	13	32914904	NS:V2138F	1.575	0.14	0.00231942	1.955	0.034	0.00699	NA	NA	0	NA	NA	0	0.53	0.57	0.001536	<<	0.56	0.0002973
														exm1061962	rs55969723	13	32912679	NS:Q1396R	1.809	0.15	0.00112657	1.921	0.11	0.003961	NA	NA	0	NA	NA	0	NA	NA	0	NA	NA	0
														exm1061859	rs55800493	13	32906655	NS:Q347R	0.357	0.16	0.0010603	0.482	0.33	0.003262	NA	NA	0	NA	NA	0	<<	0.037	0.000768	NA	NA	0
														exm1061898	rs11571652	13	32910403	SP	0.357	0.16	0.0010603	0.481	0.33	0.003262	NA	NA	0	NA	NA	0	<<	0.037	0.000768	NA	NA	0
														exm1061935	rs55638633	13	32911547	NS:L1019V	>>	0.17	0	NA	NA	0	NA	NA	0	NA	NA	0	NA	NA	0	>>	0.18	0
														exm1062092	rs28897744	13	32930673	NS:T2515I	4.726	0.17	6.62778e-05	<<	0.58	0.0002331	NA	NA	0	NA	NA	0	NA	NA	0	>>	0.067	0
														exm1062141	rs11571769	13	32953550	NS:A2951T	0.775	0.2	0.00649437	<<	0.19	0.001631	0.721	0.78	0.003722	NA	NA	0	0.785	0.31	0.02573	0.97	0.94	0.006243
														exm1062093	rs80358981	13	32930687	ST:R2520X	>>	0.21	0	NA	NA	0	>>	0.2	0	NA	NA	0	NA	NA	0	NA	NA	0
														exm1061956	rs41293485	13	32912361	NS:C1290Y	1.401	0.22	0.00304918	1.202	0.54	0.01048	>>	0.16	0	NA	NA	0	4.742	0.17	0.0003843	>>	0.34	0
														exm1061975	rs2219594	13	32913173	NS:H1561N	1.539	0.22	0.00178926	1.927	0.064	0.005592	NA	NA	0	NA	NA	0	<<	0.3	0.000768	<<	0.56	0.0002973
														exm2221593	rs79456940	13	32914817	NS:V2109I	0.624	0.23	0.00212061	NA	NA	0	<<	0.43	0.001241	0.636	0.25	0.007704	NA	NA	0	NA	NA	0
														exm2221592	rs56191579	13	32914623	NS:G2044V	1.431	0.24	0.00198834	NA	NA	0	<<	0.44	0.001241	1.517	0.18	0.00721	NA	NA	0	NA	NA	0
														exm1062042	rs55794205	13	32914814	NS:R2108C	0.304	0.24	0.000463883	NA	NA	0	<<	0.19	0.003722	1.509	0.74	0.000497	<<	0.38	0.000384	<<	0.38	0.0002973
														exm1062120	rs80359065	13	32937526	NS:K2729N	1.319	0.24	0.00344599	NA	NA	0	<<	0.44	0.001241	1.386	0.17	0.01243	NA	NA	0	<<	0.4	0.0002973
														exm1061889	rs56328701	13	32907401	NS:D596H	<<	0.25	0.000198807	<<	0.59	0.000233	NA	NA	0	NA	NA	0	NA	NA	0	<<	0.28	0.0005945
														exm1061891	rs28897710	13	32907407	NS:T598A	0.428	0.26	0.00072896	3.162	0.39	0.000233	NA	NA	0	NA	NA	0	0.629	0.69	0.001152	<<	0.086	0.002081
														exm1062034	rs1799954	13	32914592	NS:R2034C	1.365	0.26	0.00231942	0.586	0.63	0.001165	<<	0.36	0.002481	NA	NA	0	1.127	0.79	0.00576	2.23	0.039	0.003864
														exm1062084	rs169547	13	32929387	NS:V2466V	1.153	0.26	0.0180276	1.16	0.26	0.06104	NA	NA	0	>>	0.65	0	1.74	0.36	0.002306	<<	0.11	0.001189
														exm1061863	rs41293475	13	32906766	NS:S384F	0.467	0.32	0.000662691	>>	0.1	0	NA	NA	0	NA	NA	0	<<	0.28	0.000768	0.297	0.23	0.002378
														exm1061963	rs70953664	13	32912733	NS:T1414M	1.347	0.32	0.00265076	1.129	0.72	0.008854	NA	NA	0	<<	0.5	0.0002485	8.234	0.025	0.000384	NA	NA	0
														exm1062041	rs56172926	13	32914809	NS:L2106P	<<	0.33	0.000132538	NA	NA	0	NA	NA	0	NA	NA	0	<<	0.49	0.000384	<<	0.45	0.0002973
														exm1062152	rs28897755	13	32953971	NS:T3013I	0.366	0.33	0.000397614	<<	0.59	0.000233	NA	NA	0	<<	0.31	0.0002485	NA	NA	0	0.553	0.59	0.001189
														exm1794978	rs74047012	13	32930730	NS:A2534V	<<	0.35	0.000132538	<<	0.58	0.000233	<<	0.49	0.001241	NA	NA	0	NA	NA	0	NA	NA	0
														exm1061947	rs80358600	13	32912007	NS:S1172L	<<	0.39	0.000132556	NA	NA	0	NA	NA	0	NA	NA	0	<<	0.5	0.000384	<<	0.55	0.0002973
														exm1062179	rs55775473	13	32971167	NS:G3212R	0.634	0.39	0.00152419	0.524	0.28	0.005359	NA	NA	0	NA	NA	0	>>	0.77	0	NA	NA	0
														exm1061946	rs80358589	13	32911937	NS:M1149V	<<	0.41	0.000132538	<<	0.45	0.000466	NA	NA	0	NA	NA	0	NA	NA	0	NA	NA	0
														exm1062021	rs4987117	13	32914236	NS:T1915M	1.127	0.41	0.010603	0.609	0.2	0.01095	3.125	0.074	0.004963	NA	NA	0	2.439	0.004	0.006912	0.934	0.73	0.02705
														exm1062023	rs45491005	13	32914260	NS:D1923A	0.43	0.41	0.000530152	0.449	0.44	0.001864	NA	NA	0	NA	NA	0	NA	NA	0	NA	NA	0
														exm1061913	rs55968715	13	32910812	NS:T774A	<<	0.43	6.62691e-05	NA	NA	0	NA	NA	0	NA	NA	0	NA	NA	0	<<	0.41	0.0002973
														exm1062201	rs55853199	13	32972852	NS:T3401M	<<	0.43	6.62691e-05	NA	NA	0	NA	NA	0	NA	NA	0	<<	0.49	0.000384	NA	NA	0
														exm1061996	rs80358755	13	32913804	NS:G1771D	2.857	0.44	6.64187e-05	<<	0.57	0.0002331	NA	NA	0	NA	NA	0	NA	NA	0	>>	0.089	0
														exm1062181	rs55847618	13	32972420	NS:K3257R	0.462	0.47	0.000397614	0.634	0.68	0.001165	NA	NA	0	NA	NA	0	<<	0.49	0.000384	NA	NA	0
														exm1061993	rs55639415	13	32913690	NS:S1733F	0.587	0.48	0.000795334	0.595	0.49	0.002797	NA	NA	0	NA	NA	0	NA	NA	0	NA	NA	0
														exm1062045	rs55953736	13	32914839	NS:H2116R	0.793	0.48	0.00291622	0.765	0.52	0.007689	<<	0.43	0.001241	NA	NA	0	0.646	0.51	0.003459	1.545	0.77	0.0002973
														exm1062013	rs55996097	13	32914127	NS:E1879K	<<	0.49	6.62691e-05	NA	NA	0	NA	NA	0	NA	NA	0	NA	NA	0	<<	0.48	0.0002973
														exm1061853	rs28897706	13	32906593	NS:S326R	0.494	0.52	0.000265076	NA	NA	0	<<	0.28	0.002481	NA	NA	0	NA	NA	0	0.978	0.99	0.0005945
														exm1062166	rs56204128	13	32968922	NS:M3118T	<<	0.52	6.62691e-05	<<	0.55	0.000233	NA	NA	0	NA	NA	0	NA	NA	0	NA	NA	0
														exm1062140	rs28897754	13	32953549	NS:K2950N	0.714	0.56	0.00072896	NA	NA	0	<<	0.38	0.001241	NA	NA	0	0.611	0.54	0.002688	1.295	0.78	0.0008918
														exm1062065	rs55712212	13	32915313	NS:G2274V	<<	0.57	6.62691e-05	NA	NA	0	NA	NA	0	NA	NA	0	NA	NA	0	<<	0.59	0.0002973
														exm1062109	rs28897745	13	32937333	NS:D2665G	2.192	0.57	6.62691e-05	NA	NA	0	NA	NA	0	NA	NA	0	>>	0.19	0	<<	0.57	0.0002973
														exm1061972	rs28897728	13	32913077	NS:G1529R	0.64	0.58	0.000463945	<<	0.63	0.000233	NA	NA	0	<<	0.51	0.0002486	<<	0.24	0.001152	2.27	0.4	0.0005945
														exm2221587	rs11571653	13	32910842	NS:M784V	1.047	0.62	0.0286945	NA	NA	0	0.56	0.48	0.007444	1.054	0.58	0.1059	NA	NA	0	1.588	0.76	0.0002973
														exm1795019	rs11571831	13	32972380	NS:V3244I	0.891	0.62	0.00616302	0.612	0.078	0.0212	>>	0.031	0	>>	0.11	0	8.488	0.024	0.000384	4.063	0.23	0.0002973
														exm1062014	rs11571657	13	32914132	NS:N1880K	0.853	0.63	0.00311465	1.057	0.87	0.009553	NA	NA	0	NA	NA	0	<<	0.19	0.001536	<<	0.37	0.0005945
														exm1062026	rs56157628	13	32914371	NS:C1960Y	1.809	0.63	0.000132538	1.851	0.61	0.000466	NA	NA	0	NA	NA	0	NA	NA	0	NA	NA	0
														exm1061873	rs56403624	13	32907000	NS:E462G	1.926	0.64	6.62691e-05	NA	NA	0	NA	NA	0	NA	NA	0	NA	NA	0	2.135	0.58	0.0002973
														exm2276291	rs28897716	13	32911295	NS:D935N	0.733	0.64	0.000662691	<<	0.27	0.000932	NA	NA	0	NA	NA	0	<<	0.41	0.000768	1.716	0.48	0.001189
														exm1062071	rs45574331	13	32929007	NS:K2339N	0.899	0.65	0.00616384	0.605	0.072	0.02144	>>	0.031	0	>>	0.11	0	8.489	0.024	0.0003843	>>	0.036	0
														exm1794923	rs80358457	13	32907359	NS:T582P	1.217	0.67	0.000994036	NA	NA	0	NA	NA	0	1.093	0.86	0.003728	NA	NA	0	>>	0.22	0
														exm1062116	rs28897747	13	32937488	NS:A2717S	0.724	0.68	0.000530152	3.656	0.17	0.000466	NA	NA	0	NA	NA	0	NA	NA	0	<<	0.1	0.001784
														exm1062160	rs55933907	13	32954261	NS:V3079I	0.731	0.69	0.000662691	0.744	0.7	0.00233	NA	NA	0	NA	NA	0	NA	NA	0	NA	NA	0
														exm1061808	rs4987046	13	32893271	NS:Y42C	0.822	0.74	0.000662691	<<	0.45	0.000466	NA	NA	0	NA	NA	0	1.064	0.95	0.000768	0.696	0.66	0.001784
														exm1062018	rs4987048	13	32914196	NS:D1902N	1.08	0.74	0.00563362	1.008	0.97	0.01957	NA	NA	0	NA	NA	0	6.317	0.068	0.000384	NA	NA	0
														exm1061922	rs80359347	13	32911278	NS:L929S	1.091	0.76	0.00344599	1.124	0.7	0.01165	NA	NA	0	NA	NA	0	<<	0.38	0.000768	>>	0.11	0
														exm1062195	rs56309455	13	32972771	NS:T3374I	1.204	0.76	0.000662691	0.953	0.94	0.00233	NA	NA	0	NA	NA	0	>>	0.13	0	NA	NA	0
														exm1061900	rs28897712	13	32910456	NS:P655R	0.744	0.8	0.000198807	NA	NA	0	NA	NA	0	NA	NA	0	NA	NA	0	0.748	0.8	0.0008918
														exm1062119	rs28897749	13	32937521	NS:V2728I	0.902	0.84	0.000927767	<<	0.39	0.000699	<<	0.42	0.001241	NA	NA	0	<<	0.49	0.000384	1.291	0.65	0.002675
														exm1062043	rs35029074	13	32914815	NS:R2108H	0.946	0.87	0.00258449	1.228	0.6	0.006524	>>	0.15	0	>>	0.62	0	<<	0.093	0.002304	0.489	0.51	0.001486
														exm1062144	rs59004709	13	32953604	NS:V2969M	1.227	0.87	0.000132538	<<	0.45	0.000466	NA	NA	0	NA	NA	0	>>	0.22	0	NA	NA	0
														exm1062077	rs55977008	13	32929140	NS:Q2384K	0.932	0.88	0.00152419	0.972	0.95	0.005359	NA	NA	0	NA	NA	0	NA	NA	0	NA	NA	0
														exm1062081	rs4986860	13	32929309	NS:H2440R	1.03	0.88	0.00788602	0.758	0.22	0.02749	>>	0.0093	0	>>	0.11	0	8.488	0.024	0.000384	>>	0.036	0
														exm1794920	rs79483201	13	32906558	NS:C315S	0.848	0.89	0.000198807	NA	NA	0	NA	NA	0	0.846	0.89	0.0007455	NA	NA	0	NA	NA	0
														exm1061809	rs56091799	13	32893321	NS:P59A	0.93	0.9	0.00106157	0.775	0.69	0.003495	NA	NA	0	NA	NA	0	2.114	0.59	0.0003849	NA	NA	0
														exm1061892	rs75419644	13	32907413	NS:Y600H	0.945	0.9	0.00178926	0.996	0.99	0.006058	NA	NA	0	NA	NA	0	<<	0.54	0.000384	NA	NA	0
														exm1062089	rs11571707	13	32930598	NS:I2490T	1.013	0.92	0.0168323	1.481	0.51	0.002563	<<	0.17	0.003722	0.837	0.88	0.0007455	0.992	0.95	0.08679	1.347	0.6	0.00327
														exm1062165	rs41293521	13	32968861	NS:Y3098H	1.119	0.93	0.000132538	NA	NA	0	NA	NA	0	NA	NA	0	1.337	0.81	0.000768	NA	NA	0
														exm1062139	rs4987047	13	32953529	NS:I2944F	0.989	0.94	0.0119427	0.876	0.46	0.04033	2.458	0.47	0.001241	0.527	0.78	0.0002495	3.504	0.075	0.001152	<<	0.29	0.0005945
														exm1061930	rs2227944	13	32911452	NS:N987I	1.019	0.95	0.00344599	1.048	0.88	0.01165	NA	NA	0	NA	NA	0	<<	0.38	0.000768	>>	0.11	0
														exm1062090	rs55716624	13	32930633	NS:R2502C	1.029	0.96	0.0010603	1.3	0.62	0.003262	<<	0.32	0.002481	NA	NA	0	NA	NA	0	NA	NA	0
														exm1062190	rs11571833	13	32972626	ST:K3326X	1.008	0.98	0.0031163	<<	0.24	0.001165	0.68	0.74	0.003722	NA	NA	0	1.572	0.33	0.00384	0.944	0.87	0.008621
														exm1061964	rs28897727	13	32912750	NS:D1420Y	1.005	0.99	0.00231942	1.374	0.64	0.002097	<<	0.5	0.001241	NA	NA	0	4.428	0.066	0.000768	0.676	0.37	0.006837
														exm1062064	rs80358906	13	32915295	NS:R2268K	0.984	0.99	0.000265076	0.989	0.99	0.000932	NA	NA	0	NA	NA	0	NA	NA	0	NA	NA	0
														exm1061861	rs144848	13	32906729	NS:N372H	1	1	0.227821	0.955	0.64	0.1421	0.978	0.86	0.3491	1.05	0.51	0.2007	0.998	0.98	0.2922	0.979	0.75	0.2907
BRIP1	16	0.965	0.289	0.879	0.338	0.94	0.137	0.897	0.518	0.941	0.423	0.959	0.881	exm1342897	rs28997570	17	59885856	NS:K297R	0.392	0.2	0.000994036	0.502	0.51	0.001631	NA	NA	0	NA	NA	0	2.79	0.45	0.000384	<<	0.086	0.002081
														exm1342846	rs137852986	17	59793412	ST:R798X	<<	0.23	0.000265076	<<	0.48	0.000466	NA	NA	0	NA	NA	0	<<	0.35	0.000768	NA	NA	0
														exm1342815	rs145855459	17	59761029	NS:E1126D	0.501	0.36	0.000861498	0.628	0.54	0.002563	NA	NA	0	NA	NA	0	<<	0.37	0.000768	NA	NA	0
														exm1342920	rs116952709	17	59926567	NS:A144T	0.693	0.36	0.00185553	2.709	0.47	0.000233	0.926	0.93	0.004963	0.529	0.2	0.005716	NA	NA	0	NA	NA	0
														exm1342832	rs4986764	17	59763347	NS:S919S	0.972	0.4	0.313453	1.001	0.99	0.3255	0.919	0.51	0.3598	0.889	0.095	0.2502	1.029	0.73	0.2392	0.986	0.83	0.42
														exm1342890	rs150624408	17	59876546	NS:R419W	<<	0.44	0.000132538	<<	0.6	0.000233	NA	NA	0	NA	NA	0	NA	NA	0	<<	0.56	0.0002973
														exm1342856	rs45589637	17	59821830	NS:Q740H	0.638	0.49	0.000662691	NA	NA	0	NA	NA	0	NA	NA	0	0.275	0.19	0.003072	2.383	0.38	0.0005945
														exm1342915	rs4988346	17	59924512	NS:V193I	1.204	0.5	0.00251822	0.893	0.92	0.000932	NA	NA	0	NA	NA	0	1.263	0.56	0.006528	1.243	0.59	0.005054
														exm1342812	rs28997573	17	59760963	NS:D1148E	<<	0.56	6.62691e-05	NA	NA	0	NA	NA	0	NA	NA	0	NA	NA	0	<<	0.58	0.0002973
														exm1342917	rs4988345	17	59924572	NS:R173C	1.221	0.58	0.00165673	1.982	0.27	0.001631	0.789	0.84	0.003722	NA	NA	0	0.888	0.89	0.00192	1.15	0.8	0.002973
														exm1342855	rs111536363	17	59821814	NS:I746V	0.866	0.6	0.0045063	0.88	0.65	0.01538	NA	NA	0	NA	NA	0	1.828	0.67	0.000384	<<	0.53	0.0002973
														exm1342913	rs4988347	17	59924505	NS:L195P	0.755	0.62	0.000862183	<<	0.32	0.0006993	<<	0.49	0.001241	NA	NA	0	<<	0.46	0.000384	1.209	0.76	0.00238
														exm1342903	rs28997569	17	59885956	NS:R264W	1.224	0.74	0.000596422	1.378	0.7	0.001165	NA	NA	0	NA	NA	0	2.378	0.53	0.000384	0.578	0.63	0.0008918
														exm1342929	rs137852984	17	59937223	NS:P47A	1.191	0.89	0.000132538	NA	NA	0	NA	NA	0	NA	NA	0	>>	0.15	0	<<	0.33	0.0005945
														exm1342923	rs143615668	17	59934481	NS:R106H	1.07	0.94	0.000331345	0.912	0.93	0.000932	NA	NA	0	NA	NA	0	0.575	0.75	0.000384	NA	NA	0
														exm1342843	NA	17	59793364	NS:R814C	1.058	0.96	0.000132538	NA	NA	0	<<	0.43	0.001241	2.115	0.59	0.0002485	NA	NA	0	NA	NA	0
CHEK2	8	0.983	0.945	0.983	0.945	1.253	0.426	1.253	0.426	0.795	0.699	0.795	0.699	exm1597261	rs28909982	22	29121326	NS:R160G	5.94	0.08	6.62691e-05	NA	NA	0	NA	NA	0	NA	NA	0	>>	0.016	0	<<	0.45	0.0002973
														exm1597265	rs17883862	22	29130456	NS:P85L	0.671	0.34	0.0023879	0.738	0.47	0.007922	NA	NA	0	NA	NA	0	<<	0.52	0.000384	<<	0.49	0.0002976
														exm1597255	rs17879961	22	29121087	NS:I200T	1.565	0.37	0.000662691	4.723	0.23	0.000233	NA	NA	0	>>	0.13	0	<<	0.47	0.000384	1.28	0.67	0.002378
														exm1597277	NA	22	29130703	NS:R3W	<<	0.45	0.000132538	<<	0.61	0.000233	NA	NA	0	NA	NA	0	NA	NA	0	<<	0.56	0.0002973
														exm1597276	NA	22	29130696	NS:S5L	<<	0.53	6.62691e-05	NA	NA	0	NA	NA	0	NA	NA	0	NA	NA	0	<<	0.54	0.0002973
														exm1597269	rs141568342	22	29130520	NS:E64K	2.203	0.57	6.62691e-05	NA	NA	0	NA	NA	0	NA	NA	0	NA	NA	0	2.06	0.6	0.0002973
														exm1597252	rs77130927	22	29121019	NS:R223C	0.743	0.6	0.0010603	0.943	0.94	0.001864	NA	NA	0	<<	0.12	0.00174	>>	0.44	0	2.348	0.54	0.0002973
														exm1597220	rs143611747	22	29095881	NS:R97H	1.976	0.63	6.63658e-05	NA	NA	0	NA	NA	0	NA	NA	0	NA	NA	0	1.985	0.63	0.0002978
NBN	17	0.987	0.679	0.907	0.311	0.991	0.82	1.005	0.967	0.943	0.4	0.736	0.144	exm709113	rs115321485	8	90960084	NS:E628K	0.41	0.0067	0.00550763	0.368	0.0057	0.01841	NA	NA	0	NA	NA	0	2.278	0.4	0.000768	<<	0.18	0.0005952
														exm709116	rs146989944	8	90965540	NS:P593A	3.479	0.038	0.000331345	3.198	0.07	0.001165	NA	NA	0	NA	NA	0	>>	0.14	0	NA	NA	0
														exm709155	rs147626427	8	90982700	NS:F263S	3.479	0.038	0.000331345	3.198	0.07	0.001165	NA	NA	0	NA	NA	0	>>	0.14	0	NA	NA	0
														exm709126	rs141137543	8	90967554	NS:T452P	1.685	0.26	0.000927767	2.454	0.062	0.00233	NA	NA	0	NA	NA	0	<<	0.24	0.001152	<<	0.54	0.0002973
														exm709169	rs61754966	8	90990521	NS:I171V	0.71	0.34	0.00238569	3.435	0.19	0.000466	NA	NA	0	0.772	0.55	0.006213	<<	0.23	0.001152	0.337	0.29	0.001784
														exm2177409	NA	8	90971041	NS:V346M	<<	0.38	0.000132538	NA	NA	0	NA	NA	0	<<	0.39	0.000497	NA	NA	0	NA	NA	0
														exm709121	rs3026268	8	90965828	NS:T497A	0.858	0.51	0.00636183	0.839	0.48	0.0212	NA	NA	0	NA	NA	0	1.17	0.83	0.00192	NA	NA	0
														exm2177401	rs192236678	8	90965508	NS:F603L	1.459	0.55	0.000463883	NA	NA	0	<<	0.43	0.001241	1.845	0.34	0.001491	NA	NA	0	NA	NA	0
														exm709129	rs28538230	8	90967591	NS:I439M	0.722	0.56	0.00119284	0.661	0.51	0.003961	NA	NA	0	NA	NA	0	0.608	0.78	0.000384	NA	NA	0
														exm709102	rs72563785	8	90955519	NS:N716D	0.948	0.79	0.00722333	0.958	0.84	0.02353	2.089	0.6	0.001241	NA	NA	0	0.696	0.66	0.002304	2.471	0.51	0.0002973
														exm709130	rs104895032	8	90967646	NS:L421S	1.224	0.87	0.000132538	<<	0.62	0.000233	>>	0.16	0	NA	NA	0	NA	NA	0	<<	0.45	0.0002973
														exm709118	rs142334798	8	90965597	NS:L574I	1.12	0.92	0.000198807	1.965	0.58	0.000466	NA	NA	0	NA	NA	0	NA	NA	0	<<	0.45	0.0002973
														exm709167	rs1805794	8	90990479	NS:E185Q	0.997	0.93	0.35613	0.921	0.3	0.2351	0.813	0.11	0.3784	1.011	0.85	0.5219	1.1	0.19	0.3418	1.022	0.75	0.3181
														exm709172	NA	8	90992986	NS:M152I	1.026	0.98	0.000199045	<<	0.47	0.000466	NA	NA	0	>>	0.17	0	NA	NA	0	<<	0.5	0.0002974
														exm709154	rs769420	8	90982691	NS:P266L	0.997	0.99	0.00914513	0.967	0.86	0.03145	NA	NA	0	NA	NA	0	1.532	0.62	0.001152	>>	0.21	0
														exm709164	rs61754796	8	90983475	NS:V210F	1.012	0.99	0.000331521	<<	0.45	0.000466	NA	NA	0	NA	NA	0	NA	NA	0	1.546	0.63	0.0008923
														exm709185	rs61753720	8	90993640	NS:D95N	1.007	0.99	0.000994036	1.062	0.96	0.000699	NA	NA	0	NA	NA	0	2.119	0.59	0.000384	0.899	0.86	0.00327
PALB2	26	0.987	0.645	1.063	0.492	1.004	0.919	1.077	0.504	1.008	0.901	1.059	0.762	exm1226655	rs138789658	16	23649446	NS:K18R	1.687	0.027	0.0038436	1.652	0.044	0.01281	>>	0.12	0	NA	NA	0	2.04	0.59	0.000384	<<	0.28	0.0005945
														exm1226638	rs139555085	16	23647467	NS:D134N	0.496	0.25	0.00132538	0.431	0.25	0.004194	NA	NA	0	NA	NA	0	0.925	0.95	0.000768	NA	NA	0
														exm1226658	rs150390726	16	23652456	NS:P8L	<<	0.3	0.000265182	<<	0.31	0.0009333	NA	NA	0	NA	NA	0	NA	NA	0	NA	NA	0
														exm1226521	rs146377793	16	23619278	NS:R1086Q	<<	0.32	0.000198833	<<	0.46	0.000466	NA	NA	0	<<	0.54	0.0002486	NA	NA	0	NA	NA	0
														exm1226589	rs152451	16	23646191	NS:Q559R	0.961	0.36	0.165142	0.979	0.8	0.1994	0.906	0.47	0.34	0.863	0.063	0.1991	1.072	0.55	0.09178	1.063	0.56	0.09572
														exm1226538	rs149522412	16	23634435	NS:S951P	1.73	0.37	0.000530223	1.092	0.91	0.001631	NA	NA	0	NA	NA	0	1.299	0.86	0.000384	>>	0.068	0
														exm1226649	NA	16	23649272	SP	<<	0.43	0.000132538	<<	0.61	0.000233	NA	NA	0	<<	0.44	0.0002485	NA	NA	0	NA	NA	0
														exm1226507	NA	16	23614833	NS:H1170Y	<<	0.44	6.62691e-05	NA	NA	0	NA	NA	0	NA	NA	0	NA	NA	0	<<	0.4	0.0002973
														exm1226571	rs141458731	16	23641340	NS:A712V	0.439	0.44	0.000331345	NA	NA	0	>>	0.15	0	NA	NA	0	<<	0.35	0.000768	<<	0.28	0.0008918
														exm1226640	rs61756147	16	23647569	NS:L100F	<<	0.45	6.62691e-05	NA	NA	0	NA	NA	0	NA	NA	0	NA	NA	0	<<	0.48	0.0002973
														exm1226608	rs45510998	16	23646617	NS:S417Y	<<	0.5	6.62691e-05	NA	NA	0	NA	NA	0	NA	NA	0	NA	NA	0	<<	0.52	0.0002973
														exm1226624	rs3809683	16	23646942	NS:I309V	1.124	0.51	0.00868125	1.265	0.22	0.0261	NA	NA	0	0.563	0.36	0.003479	1.089	0.92	0.001536	<<	0.55	0.0002973
														exm1226548	rs45568339	16	23637715	NS:P864S	0.809	0.55	0.00225494	1.084	0.92	0.001636	<<	0.49	0.001241	NA	NA	0	0.783	0.68	0.004224	0.809	0.68	0.004459
														exm1226632	rs45594034	16	23647211	NS:D219G	2.179	0.57	6.62691e-05	NA	NA	0	NA	NA	0	NA	NA	0	>>	0.13	0	<<	0.55	0.0002973
														exm1226616	rs45494092	16	23646857	NS:L337S	1.096	0.58	0.00788602	1.377	0.42	0.005825	0.482	0.51	0.004963	>>	0.28	0	1.146	0.67	0.01075	0.989	0.96	0.01843
														exm1852112	rs75023630	16	23646375	NS:D498Y	1.299	0.64	0.000662691	NA	NA	0	NA	NA	0	1.313	0.62	0.002485	NA	NA	0	NA	NA	0
														exm1226604	rs146434474	16	23646530	NS:D446V	<<	0.64	6.62691e-05	<<	0.66	0.000233	NA	NA	0	NA	NA	0	NA	NA	0	NA	NA	0
														exm1226631	rs150517167	16	23647199	NS:I223T	<<	0.64	6.62691e-05	<<	0.66	0.000233	NA	NA	0	NA	NA	0	NA	NA	0	NA	NA	0
														exm1852106	NA	16	23641448	NS:I676T	0.807	0.75	0.000596422	NA	NA	0	NA	NA	0	NA	NA	0	0.796	0.73	0.003456	NA	NA	0
														exm1226540	rs45478192	16	23635348	NS:L939W	1.137	0.78	0.000927767	<<	0.35	0.000699	NA	NA	0	NA	NA	0	1.051	0.95	0.001536	1.555	0.45	0.002081
														exm1226542	rs45624036	16	23635370	NS:V932M	0.919	0.79	0.00231942	1.237	0.85	0.000699	>>	0.13	0	NA	NA	0	0.702	0.52	0.004992	0.938	0.88	0.005648
														exm1226533	rs45551636	16	23634293	NS:G998E	0.965	0.81	0.0104042	0.893	0.81	0.005359	1.16	0.84	0.006203	<<	0.29	0.0002485	0.955	0.87	0.01536	0.985	0.94	0.02616
														exm1226630	rs113217267	16	23647146	NS:N241D	0.918	0.84	0.00165695	0.989	0.98	0.005128	NA	NA	0	NA	NA	0	0.415	0.48	0.001152	NA	NA	0
														exm1226531	rs183489969	16	23632742	NS:E1018D	0.918	0.87	0.000795229	NA	NA	0	<<	0.29	0.002481	1.261	0.68	0.002237	<<	0.4	0.000384	NA	NA	0
														exm1226576	rs45532440	16	23641461	NS:E672Q	0.982	0.89	0.0131213	0.802	0.6	0.00699	0.828	0.79	0.008685	<<	0.29	0.0002485	1.008	0.97	0.01843	1.016	0.93	0.03329
														exm1226633	rs57605939	16	23647238	NS:P210L	1.002	0.99	0.0187541	0.983	0.9	0.06314	<<	0.44	0.001241	>>	0.84	0	1.482	0.47	0.003072	0.365	0.42	0.0008918
PTEN	1	<<	0.506	<<	0.506	<<	0.636	<<	0.636	<<	0.765	<<	0.765	exm839882	NA	10	89690828	NS:A79T	<<	0.51	6.62866e-05	NA	NA	0	NA	NA	0	NA	NA	0	<<	0.49	0.0003843	NA	NA	0
RAD50	24	1.005	0.971	1.005	0.971	1.084	0.608	1.084	0.608	0.55	0.0956	0.55	0.0956	exm476921	rs2230017	5	131915574	NS:T191I	0.44	0.0069	0.00576541	0.443	0.014	0.01817	NA	NA	0	NA	NA	0	0.995	1	0.00192	<<	0.18	0.001189
														exm476941	rs146370443	5	131924421	NS:R365Q	5.215	0.036	0.000132538	<<	0.62	0.000233	NA	NA	0	6.465	0.081	0.0002485	>>	0.035	0	NA	NA	0
														exm476976	rs149201802	5	131930642	ST:Y625X	>>	0.043	0	NA	NA	0	NA	NA	0	NA	NA	0	>>	0.033	0	NA	NA	0
														exm476925	rs28903088	5	131915673	NS:R224H	3.729	0.059	0.000198807	<<	0.56	0.000233	NA	NA	0	NA	NA	0	<<	0.45	0.000384	10.844	0.0075	0.0002973
														exm476964	NA	5	131927596	NS:I555V	>>	0.13	0	NA	NA	0	NA	NA	0	NA	NA	0	NA	NA	0	>>	0.084	0
														exm476951	rs149217423	5	131925413	NS:K446E	3.491	0.15	0.000132538	<<	0.61	0.000233	NA	NA	0	NA	NA	0	NA	NA	0	6.267	0.071	0.0002973
														exm477007	rs138749920	5	131940620	NS:R883C	2.259	0.15	0.000397614	NA	NA	0	NA	NA	0	1.397	0.78	0.000497	1.131	0.92	0.000768	4.382	0.064	0.0005945
														exm476950	rs145428112	5	131925354	NS:Q426R	<<	0.21	0.000198807	NA	NA	0	<<	0.49	0.001241	NA	NA	0	NA	NA	0	<<	0.33	0.0005945
														exm477026	rs143189763	5	131953850	NS:I1085V	1.739	0.24	0.000861498	1.404	0.52	0.003029	NA	NA	0	NA	NA	0	>>	0.054	0	NA	NA	0
														exm476977	rs144749616	5	131930678	NS:D637E	3.573	0.27	6.62778e-05	NA	NA	0	NA	NA	0	NA	NA	0	NA	NA	0	3.638	0.26	0.0002974
														exm477018	rs149577978	5	131951780	NS:H1041R	1.975	0.27	0.000463883	1.597	0.5	0.001631	NA	NA	0	NA	NA	0	NA	NA	0	>>	0.2	0
														exm476944	rs150030986	5	131924481	NS:R385H	<<	0.28	0.000265076	<<	0.4	0.000699	NA	NA	0	NA	NA	0	NA	NA	0	<<	0.5	0.0002973
														exm476947	NA	5	131924538	NS:Q404R	0.629	0.35	0.00132538	NA	NA	0	NA	NA	0	0.589	0.34	0.004722	NA	NA	0	2.01	0.62	0.0002973
														exm476956	rs147366706	5	131926997	NS:A512S	0.41	0.38	0.000596422	0.428	0.41	0.002097	NA	NA	0	NA	NA	0	NA	NA	0	NA	NA	0
														exm476908	rs151109830	5	131911520	NS:V89I	2.35	0.39	0.000132538	>>	0.045	0	<<	0.5	0.001241	NA	NA	0	NA	NA	0	2.36	0.54	0.0002973
														exm476923	NA	5	131915612	NS:K204E	<<	0.42	6.62691e-05	NA	NA	0	<<	0.45	0.001241	NA	NA	0	NA	NA	0	NA	NA	0
														exm476952	rs145031602	5	131925479	NS:E468K	2.726	0.46	6.62691e-05	2.786	0.45	0.000233	NA	NA	0	NA	NA	0	NA	NA	0	NA	NA	0
														exm476909	rs28903085	5	131911535	NS:I94L	1.182	0.61	0.0019218	<<	0.24	0.001165	4.386	0.2	0.001241	<<	0.45	0.0002485	1.356	0.68	0.00192	1.212	0.65	0.005054
														exm476914	rs28903086	5	131915022	NS:V127I	0.764	0.69	0.000596422	NA	NA	0	NA	NA	0	NA	NA	0	<<	0.35	0.000768	1.014	0.98	0.002081
														exm476998	rs61749630	5	131939181	SP	1.396	0.79	0.000132538	<<	0.63	0.000233	NA	NA	0	NA	NA	0	NA	NA	0	2.352	0.54	0.0002973
														exm476935	rs28903091	5	131923710	NS:R327H	0.905	0.8	0.00139165	<<	0.43	0.000466	<<	0.3	0.002481	NA	NA	0	5.291	0.027	0.000768	0.574	0.32	0.004459
														exm477035	rs144253015	5	131972872	NS:R1152Q	1.055	0.95	0.000463883	1.071	0.93	0.001631	NA	NA	0	NA	NA	0	NA	NA	0	NA	NA	0
														exm2086331	NA	5	131977907	NS:L1264F	0.926	0.95	0.000198807	NA	NA	0	NA	NA	0	0.934	0.95	0.0007455	NA	NA	0	NA	NA	0
														exm476993	rs141989813	5	131939072	NS:R763H	1.029	0.98	0.000132556	NA	NA	0	NA	NA	0	NA	NA	0	1.177	0.89	0.0007686	NA	NA	0
STK11	4	1.061	0.571	1.417	0.154	1.056	0.67	1.523	0.147	1.319	0.23	0.954	0.947	exm1399861	NA	19	1221979	NS:F298L	2.641	0.05	0.000596422	2.143	0.17	0.002097	NA	NA	0	NA	NA	0	>>	0.14	0	NA	NA	0
														exm1399885	NA	19	1226555	NS:S404F	2.143	0.34	0.000198807	NA	NA	0	NA	NA	0	NA	NA	0	<<	0.47	0.000384	3.429	0.16	0.0005945
														exm1921881	rs121913322	19	1221319	NS:P281L	1.107	0.74	0.00225315	NA	NA	0	NA	NA	0	1.112	0.73	0.008449	NA	NA	0	NA	NA	0
														exm1399876	rs59912467	19	1223125	NS:F354L	0.999	0.99	0.0129887	1.977	0.34	0.001398	1.721	0.41	0.006203	0.885	0.43	0.0415	0.752	0.74	0.00192	1.766	0.18	0.003864
TP53	4	1.052	0.896	1.052	0.896	0.561	0.343	0.561	0.343	1.686	0.48	1.686	0.48	exm1288597	rs144340710	17	7577577	NS:N103S	<<	0.48	6.62691e-05	NA	NA	0	NA	NA	0	NA	NA	0	<<	0.48	0.000384	NA	NA	0
														exm1288594	rs149633775	17	7577091	NS:R151C	<<	0.53	6.62691e-05	NA	NA	0	NA	NA	0	NA	NA	0	NA	NA	0	<<	0.51	0.0002973
														exm1903161	rs150293825	17	7574013	NS:F206F	1.223	0.78	0.000331345	NA	NA	0	>>	0.2	0	NA	NA	0	1.543	0.63	0.001152	<<	0.31	0.0005945
														exm1903177	NA	17	7579705	NS:V31I	1.138	0.78	0.000994036	NA	NA	0	<<	0.48	0.001241	1.199	0.7	0.003479	NA	NA	0	NA	NA	0
