# Supplementary material for: Genome-Wide Testing of Putative Functional Exonic Variants in Relationship with Breast and Prostate Cancer Risk in a Multiethnic Population
Source: PLoS Genet. 2013 Mar 28;9(3):e1003419. doi: 10.1371/journal.pgen.1003419 (PMC3610631; doi:10.1371/journal.pgen.1003419)
Supplement: Table S7 — Relationship between SNPs or genes known to be associated with prostate cancer and coding snps on the exome array. Summary of nearest coding snps and gene burden analyses for (S7.1) GWAS associations and (S7.2) High risk genes. (XLSX) [file pgen.1003419.s009.xlsx]

## Sheet: Sheet1
Supplemental Table S7. Relationship between SNPs or Genes Known to be Associated with Prostate Cancer and Coding SNPs on the Exome Array. Summary of Nearest coding SNPs and Gene Burden Analyses for (S7.1) GWAS associations and (S7.2) High Risk Genes
S7.1 Known GWAS Associations
																															Gene Sum Analysis
													Single Marker Analysis																		Overall				Advanced				Non-advanced
			+/-500kb		+/-100kb								Overall			African American			Native Hawaiian			Japanese American			Latino			European American			All Variants		Rare Variants		All Variants		Rare Variants		All Variants		Rare Variants
Hit	Chr	Location	No.of SNPs	No. of Genes	No.of SNPs	No. of Genes	SNP ID	rs ID	Distance(Kb)	R2	Gene	Type	OR	P	MAF	OR	P	MAF	OR	P	MAF	OR	P	MAF	OR	P	MAF	OR	P	MAF	OR	P	OR	P	OR	P	OR	P	OR	P	OR	P
rs1218582	1	154834183	301	36	25	4	exm104817	rs16836525	64.716	NA	PMVK	NS	0.785	0.0003	0.0585735	0.782	0.00045	0.1953	<0.001	0.67	0.001241	NA	NA	0	0.992	0.97	0.01384	<0.001	0.015	0.003571	0.841	0.0036	1.126	0.502	0.899	0.475	0.941	0.897	0.83	0.00339	1.074	0.706
							exm105694	rs143886639	205.258	NA	EFNA4	NS	10.813	0.0073	6.62691e-05	1.751	0.69	0.000233	NA	NA	0	NA	NA	0	NA	NA	0	>999.999	0.0045	0	0.861	0.512	0.861	0.512	0.508	0.338	0.508	0.338	0.953	0.838	0.953	0.838
							exm105343	NA	168.738	NA	DCST2	NS	>999.999	0.0095	0	NA	NA	0	NA	NA	0	NA	NA	0	>999.999	0.0091	0	NA	NA	0	0.971	0.709	1.06	0.59	0.841	0.408	0.983	0.95	0.991	0.91	1.084	0.48
							exm106534	rs146290600	421.428	NA	HCN3	NS	>999.999	0.01	0	NA	NA	0	NA	NA	0	NA	NA	0	NA	NA	0	>999.999	0.0071	0	1.039	0.579	0.997	0.969	1.062	0.711	1.334	0.112	1.028	0.705	0.951	0.574
							exm104923	rs139930056	86.639	NA	PBXIP1	NS	0.471	0.015	0.00318091	0.405	0.0082	0.01048	NA	NA	0	NA	NA	0	1.66	0.58	0.000768	<0.001	0.52	0.0002973	0.938	0.0315	0.641	0.00121	0.97	0.67	0.384	0.0291	0.931	0.0221	0.667	0.00533
							exm105101	rs145054820	126.665	NA	FLAD1	NS	3.467	0.017	0.000331345	3.503	0.03	0.000932	NA	NA	0	NA	NA	0	<0.001	0.26	0.000384	>999.999	0.048	0	0.914	0.554	0.914	0.554	0.513	0.182	0.513	0.182	0.946	0.728	0.946	0.728
							exm104734	NA	-153.547	NA	KCNN3	NS	>999.999	0.025	0	NA	NA	0	>999.999	0.16	0	NA	NA	0	NA	NA	0	>999.999	0.14	0	1.446	0.187	1.446	0.187	1.774	0.344	1.774	0.344	1.514	0.154	1.514	0.154
							exm105168	rs146522403	131.91	NA	LENEP	NS	0.577	0.026	0.00438422	0.537	0.02	0.01447	NA	NA	0	NA	NA	0	1.279	0.75	0.001158	<0.001	0.53	0.0002974	0.642	0.0513	0.642	0.0513	0.877	0.802	0.877	0.802	0.572	0.0275	0.572	0.0275
							exm106334	rs147288480	389.286	NA	FAM189B	NS	4.206	0.027	0.000198807	NA	NA	0	NA	NA	0	NA	NA	0	0.684	0.79	0.000384	6.025	0.013	0.0005945	0.921	0.189	0.978	0.836	1.213	0.178	1.417	0.124	0.891	0.0869	0.919	0.472
							exm105049	rs8191981	107.08	NA	SHC1	NS	1.312	0.036	0.0109344	<0.001	0.33	0.000233	1.575	0.43	0.01117	1.279	0.068	0.03827	NA	NA	0	2.153	0.61	0.0002973	1.175	0.138	0.914	0.646	1.353	0.221	1.202	0.668	1.124	0.313	0.889	0.576
							exm1716791	rs186517730	172.982	NA	DCST1	NS	1.727	0.039	0.00198807	NA	NA	0	<0.001	0.23	0.003722	1.843	0.026	0.00671	NA	NA	0	NA	NA	0	0.991	0.9	1.173	0.135	0.846	0.393	0.932	0.807	1.004	0.959	1.193	0.118
							exm104962	rs141722381	97.574	NA	PYGO2	NS	1.493	0.043	0.00424122	2.585	0.28	0.000466	2.03	0.061	0.02357	1.255	0.39	0.009692	2.94	0.38	0.000384	0.577	0.64	0.0008918	1.493	0.0426	1.493	0.0426	1.33	0.546	1.33	0.546	1.536	0.0385	1.536	0.0385
							exm105208	rs141845046	153.521	NA	ZBTB7B	NS	0.745	0.046	0.00994036	0.875	0.74	0.004893	0.455	0.47	0.007444	NA	NA	0	0.771	0.33	0.01344	0.737	0.13	0.02616	0.79	0.0897	0.79	0.0897	1.132	0.669	1.132	0.669	0.748	0.0538	0.748	0.0538
							exm106132	rs144786490	341.861	0.002	THBS3	NS	>999.999	0.052	0	>999.999	0.19	0	NA	NA	0	NA	NA	0	NA	NA	0	>999.999	0.17	0	1.032	0.434	1.062	0.653	1.001	0.988	0.976	0.941	1.037	0.402	1.082	0.578
							exm1716442	rs146616270	-317.2	NA	TDRD10	NS	0.183	0.069	0.000662691	<0.001	0.34	0.000466	NA	NA	0	NA	NA	0	NA	NA	0	0.221	0.12	0.002378	0.97	0.305	0.628	0.101	0.925	0.277	0.325	0.241	0.979	0.492	0.704	0.229
							exm106652	NA	431.047	NA	PKLR	NS	<0.001	0.072	0.000397614	<0.001	0.18	0.000699	NA	NA	0	NA	NA	0	NA	NA	0	<0.001	0.2	0.0008918	0.832	0.154	0.832	0.154	1.165	0.576	1.165	0.576	0.771	0.0635	0.771	0.0635
							exm105739	NA	224.774	NA	EFNA3	NS	<0.001	0.089	0.000198807	NA	NA	0	NA	NA	0	NA	NA	0	<0.001	0.091	0.001152	NA	NA	0	0.994	0.9	0.409	0.431	1.062	0.582	3.494	0.254	0.978	0.664	<0.001	0.12
							exm106372	rs76089501	392.388	NA	SCAMP3	NS	1.659	0.096	0.00159109	NA	NA	0	5.665	0.16	0.001241	1.435	0.26	0.005721	NA	NA	0	>999.999	0.11	0	1.101	0.415	1.101	0.415	0.429	0.0378	0.429	0.0378	1.173	0.194	1.173	0.194
							exm105541	rs76268440	191.762	NA	ADAM15	NS	0.631	0.11	0.00298211	0.652	0.16	0.01002	NA	NA	0	NA	NA	0	0.486	0.55	0.000768	NA	NA	0	1.01	0.705	0.798	0.158	0.909	0.125	0.995	0.989	1.023	0.384	0.803	0.194
							exm106213	rs149171124	371.398	0.002	GBA	NS	>999.999	0.11	0	NA	NA	0	NA	NA	0	NA	NA	0	NA	NA	0	>999.999	0.14	0	0.841	0.0643	0.792	0.192	0.89	0.614	0.708	0.453	0.838	0.0758	0.849	0.379
							exm1717397	NA	453.878	NA	FDPS	NS	>999.999	0.11	0	NA	NA	0	NA	NA	0	NA	NA	0	>999.999	0.088	0	NA	NA	0	1.012	0.898	0.915	0.515	0.653	0.12	0.272	0.0177	1.08	0.434	1.016	0.91
							exm104278	rs78133617	-432.403	NA	IL6R	NS	0.494	0.12	0.00139165	0.403	0.089	0.004427	NA	NA	0	NA	NA	0	1.165	0.88	0.000768	NA	NA	0	0.938	0.318	0.601	0.044	0.957	0.783	1.321	0.555	0.936	0.337	0.547	0.0312
							exm1716946	rs138253207	269.659	NA	EFNA1	NS	<0.001	0.12	0.000265111	<0.001	0.12	0.0009324	NA	NA	0	NA	NA	0	NA	NA	0	NA	NA	0	0.971	0.361	0.787	0.19	0.943	0.449	0.81	0.649	0.972	0.394	0.778	0.199
							exm105968	rs145108039	327.867	NA	MUC1	NS	0.215	0.12	0.000463883	0.296	0.23	0.001398	NA	NA	0	NA	NA	0	<0.001	0.21	0.000384	NA	NA	0	0.929	0.384	0.929	0.384	1.222	0.272	1.222	0.272	0.911	0.301	0.911	0.301
							exm106755	NA	457.589	NA	RUSC1	NS	>999.999	0.12	0	>999.999	0.13	0	NA	NA	0	NA	NA	0	NA	NA	0	NA	NA	0	0.912	0.264	0.956	0.744	0.826	0.381	0.761	0.455	0.912	0.292	0.974	0.859
							exm104356	rs138245443	-375.686	NA	SHE	NS	4.724	0.14	6.62691e-05	3.507	0.28	0.000233	NA	NA	0	NA	NA	0	>999.999	0.27	0	NA	NA	0	1.229	0.415	1.229	0.415	1.23	0.733	1.23	0.733	1.251	0.399	1.251	0.399
							exm1717035	NA	314.279	NA	TRIM46	NS	<0.001	0.14	0.000132538	NA	NA	0	NA	NA	0	NA	NA	0	<0.001	0.13	0.000768	NA	NA	0	1.019	0.85	0.944	0.703	1.121	0.629	1.439	0.25	0.983	0.878	0.855	0.351
							exm104667	rs192121167	-260.465	0.001	ADAR	NS	>999.999	0.15	0	>999.999	0.17	0	NA	NA	0	NA	NA	0	NA	NA	0	NA	NA	0	1.03	0.797	1.377	0.133	1.197	0.509	1.307	0.61	1.03	0.81	1.299	0.255
							exm107025	rs13373934	614.232	NA	ASH1L	NS	0.784	0.1	0.0102717	0.804	0.15	0.03448	NA	NA	0	NA	NA	0	0.623	0.57	0.00192	1.089	0.95	0.0005945	0.899	0.0324	0.855	0.0629	0.964	0.765	0.884	0.563	0.901	0.0491	0.854	0.0789
							exm105809	rs150295746	310.914	NA	KRTCAP2	NS	>999.999	0.21	0	>999.999	0.19	0	NA	NA	0	NA	NA	0	NA	NA	0	NA	NA	0	>999.999	0.212	>999.999	0.212		NA		NA	>999.999	0.169	>999.999	0.169
							exm106424	rs138254335	399.58	0.001	CLK2	NS	0.495	0.21	0.000927767	0.509	0.23	0.003262	NA	NA	0	NA	NA	0	NA	NA	0	NA	NA	0	0.961	0.881	0.961	0.881	0.88	0.861	0.88	0.861	0.892	0.699	0.892	0.699
							exm106720	rs16836822	456.404	NA	RUSC1-AS1	NS	0.87	0.21	0.0175613	0.868	0.22	0.05965	NA	NA	0	NA	NA	0	0.914	0.88	0.002688	2.239	0.42	0.0005945	0.953	0.539	1.23	0.401	1.152	0.448	1.496	0.444	0.928	0.372	1.149	0.6
							exm104580	rs79137415	-285.852	NA	CHRNB2	NS	0.762	0.22	0.00351226	<0.001	0.55	0.000233	NA	NA	0	NA	NA	0	0.828	0.41	0.01882	<0.001	0.22	0.0008918	0.788	0.264	0.788	0.264	1.231	0.606	1.231	0.606	0.746	0.208	0.746	0.208
							exm106159	rs144334421	345.995	NA	MTX1	NS	0.356	0.33	0.000331345	0.467	0.48	0.000932	NA	NA	0	NA	NA	0	<0.001	0.48	0.000384	NA	NA	0	0.744	0.67	0.744	0.67	<0.001	0.502	<0.001	0.502	0.633	0.567	0.633	0.567
							exm105792	rs139227744	276.517	NA	SLC50A1	NS	0.743	0.72	0.000331565	>999.999	0.23	0	<0.001	0.23	0.001241	NA	NA	0	NA	NA	0	0.487	0.51	0.00119	0.743	0.724	0.743	0.724	3.346	0.246	3.346	0.246	0.464	0.475	0.464	0.475
							exm104505	NA	-303.437	NA	UBE2Q1	NS	0.991	0.99	6.6313e-05	NA	NA	0	NA	NA	0	NA	NA	0	0.943	0.97	0.000384	NA	NA	0	0.991	0.994	0.991	0.994	<0.001	0.721	<0.001	0.721	1.199	0.898	1.199	0.898
rs4245739	1	204518842	154	11	47	3	exm141262	NA	-0.34	NA	MDM4	NS	>999.999	0.006	0	>999.999	0.01	0	NA	NA	0	NA	NA	0	>999.999	0.31	0	NA	NA	0	1.097	0.293	1.082	0.571	1.232	0.27	1.296	0.409	1.066	0.498	1.069	0.652
							exm140939	rs193298214	-124.786	NA	PIK3C2B	NS	3.808	0.0082	0.000331345	NA	NA	0	<0.001	0.24	0.002481	8.443	0.0012	0.000497	1.345	0.83	0.000384	NA	NA	0	0.981	0.716	0.94	0.321	1.058	0.645	1.19	0.207	0.965	0.517	0.904	0.132
							exm140880	rs149427705	-139.084	NA	PPP1R15B	NS	1.994	0.0087	0.00185553	2.014	0.0099	0.006058	<0.001	0.48	0.001241	NA	NA	0	>999.999	0.27	0	2.679	0.52	0.0002973	1.05	0.339	1.01	0.914	1.173	0.176	1.029	0.897	1.03	0.592	0.991	0.927
							exm141619	rs151292398	459.861	NA	NFASC	NS	<0.001	0.07	0.000463883	<0.001	0.078	0.001398	<0.001	0.4	0.001241	NA	NA	0	NA	NA	0	NA	NA	0	0.971	0.256	0.646	0.0156	0.973	0.671	0.626	0.337	0.973	0.323	0.653	0.0269
							exm140604	rs142460801	-348.041	NA	GOLT1A	NS	>999.999	0.077	0	NA	NA	0	NA	NA	0	NA	NA	0	NA	NA	0	>999.999	0.11	0	>999.999	0.0573	>999.999	0.0573		NA		NA	>999.999	0.0393	>999.999	0.0393
							exm140396	NA	-427.432	NA	SOX13	NS	5.836	0.081	6.62691e-05	NA	NA	0	NA	NA	0	NA	NA	0	>999.999	0.071	0	2.002	0.62	0.0002973	1.044	0.502	1.314	0.0825	0.882	0.461	1.473	0.265	1.052	0.456	1.337	0.079
							exm1747703	rs76468836	68.747	NA	LRRN2	NS	1.416	0.086	0.00384361	1.367	0.17	0.01118	>999.999	0.055	0	NA	NA	0	1.287	0.68	0.00192	1.163	0.84	0.001486	0.986	0.43	1.128	0.339	0.999	0.987	0.935	0.838	0.98	0.292	1.172	0.23
							exm140691	NA	-304.767	NA	PLEKHA6	NS	5.28	0.11	6.62866e-05	NA	NA	0	NA	NA	0	NA	NA	0	NA	NA	0	5.426	0.1	0.0002973	1.008	0.753	1.13	0.298	0.919	0.192	0.887	0.716	1.025	0.385	1.187	0.157
							exm140456	rs140658518	-412.505	NA	ETNK2	NS	1.899	0.12	0.000795334	5.025	0.12	0.0002331	NA	NA	0	NA	NA	0	<0.001	0.15	0.000768	2.019	0.13	0.002675	1.018	0.561	1.218	0.555	1.072	0.327	<0.001	0.2	1.015	0.635	1.447	0.267
							exm140569	rs11571098	-383.517	NA	REN	SP	4.576	0.17	6.62691e-05	4.057	0.22	0.000233	NA	NA	0	NA	NA	0	NA	NA	0	NA	NA	0	0.891	0.296	1.493	0.661	0.432	0.0266	<0.001	0.646	0.961	0.727	1.818	0.51
							exm140581	rs192636495	-359.141	NA	KISS1	NS	1.066	0.71	0.00702545	<0.001	0.47	0.000233	1.312	0.61	0.01737	1.003	0.99	0.02263	>999.999	0.32	0	>999.999	0.14	0	1.017	0.746	1.066	0.707	0.981	0.882	1.698	0.114	1.017	0.759	0.968	0.859
rs11902236	2	10117868	69	9	37	3	exm171992	rs35927125	68.551	0.001	KLF11	NS	1.136	0.021	0.059841	0.929	0.53	0.05568	1.41	0.28	0.03846	1.708	0.71	0.0002485	1.34	0.0023	0.08564	1.091	0.32	0.1216	1.077	0.123	0.877	0.36	1.103	0.398	1.065	0.847	1.099	0.0622	0.853	0.301
							exm171855	rs75930871	-64.527	NA	TAF1B	NS	0.354	0.025	0.00178926	0.352	0.024	0.006291	NA	NA	0	NA	NA	0	NA	NA	0	NA	NA	0	0.997	0.879	0.884	0.222	1.032	0.441	0.721	0.231	0.997	0.874	0.898	0.313
							exm171672	rs79932015	-487.33	NA	ADAM17	NS	1.448	0.041	0.00457256	1.496	0.032	0.01491	NA	NA	0	NA	NA	0	0.873	0.86	0.001536	1.253	0.88	0.0002973	1.054	0.269	1.167	0.0441	1.119	0.32	1.309	0.113	1.041	0.427	1.159	0.0682
							exm171933	NA	-13.417	NA	GRHL1	NS	>999.999	0.12	0	>999.999	0.15	0	NA	NA	0	NA	NA	0	NA	NA	0	NA	NA	0	0.998	0.933	1.394	0.165	0.988	0.815	0.788	0.743	0.997	0.898	1.511	0.0935
							exm172212	rs149756895	449.069	NA	HPCAL1	NS	2.573	0.13	0.000265076	2.656	0.12	0.000932	NA	NA	0	NA	NA	0	NA	NA	0	NA	NA	0	2.573	0.132	2.573	0.132	<0.001	0.624	<0.001	0.624	3.086	0.0686	3.086	0.0686
							exm172099	rs1130609	145.052	0	RRM2	NS	0.962	0.22	0.356528	1.027	0.75	0.1137	0.808	0.16	0.3908	0.945	0.32	0.6481	0.868	0.017	0.409	1.111	0.11	0.2687	0.961	0.206	<0.001	0.52	0.98	0.785	<0.001	0.842	0.961	0.23	<0.001	0.553
							exm172173	rs111598217	232.811	NA	C2orf48	NS	0.72	0.24	0.00298211	0.71	0.25	0.009786	NA	NA	0	NA	NA	0	1.011	0.99	0.000384	0.978	0.99	0.0005945	0.886	0.545	0.886	0.545	0.466	0.276	0.466	0.276	0.888	0.578	0.888	0.578
							exm171636	NA	-496.452	NA	IAH1	SP	0.318	0.27	0.000331345	<0.001	0.19	0.000699	NA	NA	0	NA	NA	0	>999.999	0.34	0	<0.001	0.31	0.0005945	0.62	0.174	0.62	0.174	<0.001	0.164	<0.001	0.164	0.665	0.265	0.665	0.265
							exm172241	rs141844180	464.175	NA	ODC1	NS	<0.001	0.37	0.000132538	<0.001	0.53	0.000233	NA	NA	0	NA	NA	0	NA	NA	0	<0.001	0.52	0.0002973	1.206	0.342	1.206	0.342	1.782	0.132	1.782	0.132	1.164	0.471	1.164	0.471
rs13385191	2	20888265	171	7	26	3	exm175549	rs143710616	340.121	NA	APOB	NS	>999.999	0.0072	0	NA	NA	0	NA	NA	0	NA	NA	0	NA	NA	0	>999.999	0.015	0	0.997	0.945	1.047	0.473	0.902	0.343	0.881	0.452	1.001	0.979	1.068	0.332
							exm175329	rs148722602	-43.082	NA	HS1BP3	NS	>999.999	0.012	0	NA	NA	0	NA	NA	0	NA	NA	0	NA	NA	0	>999.999	0.012	0	0.973	0.153	1.027	0.844	1.056	0.223	1.319	0.362	0.963	0.0651	1.006	0.965
							exm1996235	rs144676974	112.895	NA	C2orf43	NS	1.923	0.016	0.00185775	NA	NA	0	1.612	0.61	0.003722	2.015	0.015	0.006241	NA	NA	0	NA	NA	0	1.179	0.141	1.179	0.141	1.121	0.674	1.121	0.674	1.217	0.095	1.217	0.095
							exm175064	rs146257745	-485.639	NA	SDC1	NS	<0.001	0.15	0.000265076	<0.001	0.15	0.000932	NA	NA	0	NA	NA	0	NA	NA	0	NA	NA	0	0.986	0.818	0.918	0.316	1.034	0.824	1.197	0.344	0.976	0.715	0.877	0.15
							exm175189	rs139677788	-376.249	NA	PUM2	NS	0.241	0.16	0.000397614	<0.001	0.52	0.000233	<0.001	0.58	0.001241	<0.001	0.47	0.0002485	0.464	0.52	0.000768	<0.001	0.47	0.0002973	0.539	0.0752	0.539	0.0752	1.272	0.693	1.272	0.693	0.465	0.0497	0.465	0.0497
							exm175346	NA	-18.039	NA	GDF7	NS	>999.999	0.17	0	NA	NA	0	NA	NA	0	NA	NA	0	NA	NA	0	>999.999	0.15	0	1.208	0.13	1.387	0.481	0.939	0.855	1.326	0.789	1.242	0.0996	1.087	0.874
							exm175214	rs137856773	-240.661	0.008	RHOB	NS	1.711	0.42	0.000265076	>999.999	0.043	0	NA	NA	0	NA	NA	0	2.011	0.56	0.000384	0.598	0.65	0.0008918	1.71	0.424	1.71	0.424	<0.001	0.58	<0.001	0.58	2.018	0.292	2.018	0.292
rs1465618	2	43553949	106	6	16	1	exm189663	rs17031056	243.67	0.062	THADA	NS	0.905	0.0038	0.212591	0.852	0.025	0.1794	0.869	0.38	0.263	0.829	0.0023	0.3029	1.065	0.46	0.1302	1.008	0.91	0.1986	0.957	0.0605	0.924	0.0953	0.972	0.622	0.948	0.653	0.959	0.0871	0.937	0.195
							exm190111	rs34651474	467.727	NA	DYNC2LI1	NS	1.441	0.043	0.00483764	1.43	0.055	0.01608	NA	NA	0	NA	NA	0	1.262	0.77	0.001152	2.013	0.61	0.0002973	1.014	0.239	1.083	0.322	1.013	0.653	0.779	0.28	1.014	0.29	1.115	0.195
							exm189936	rs139341843	383.444	NA	PLEKHH2	NS	3.356	0.044	0.000265076	4.073	0.032	0.000699	NA	NA	0	NA	NA	0	0.888	0.93	0.000384	NA	NA	0	1.004	0.909	1.024	0.766	1.056	0.451	1.326	0.104	1.001	0.969	0.995	0.95
							exm190226	rs140111105	499.595	NA	ABCG5	ST	>999.999	0.11	0	NA	NA	0	>999.999	0.073	0	NA	NA	0	NA	NA	0	NA	NA	0	1.029	0.339	0.822	0.0863	0.98	0.777	0.678	0.209	1.027	0.388	0.85	0.176
							exm189780	rs73923830	348.899	NA	LOC728819	NS	0.913	0.23	0.0409543	0.916	0.26	0.1377	<0.001	0.69	0.001241	NA	NA	0	0.912	0.77	0.008449	0.373	0.38	0.001189	0.925	0.14	1.012	0.934	1.151	0.245	1.043	0.9	0.898	0.0554	0.972	0.851
							exm189469	rs11675632	-101.331	0.017	ZFP36L2	NS	0.934	0.35	0.0385227	0.978	0.86	0.04618	0.799	0.63	0.02109	0.506	0.044	0.01044	0.836	0.25	0.04	1.033	0.79	0.0654	0.963	0.553	1.068	0.619	0.907	0.538	1.439	0.192	0.975	0.707	1.034	0.812
rs721048	2	63131731	38	3	22	1	exm197373	NA	499.572	NA	WDPCP	NS	<0.001	0.056	0.000530152	<0.001	0.37	0.000466	NA	NA	0	NA	NA	0	NA	NA	0	<0.001	0.076	0.001784	0.822	0.0078	0.814	0.0594	0.888	0.504	0.575	0.084	0.803	0.0051	0.82	0.086
							exm197123	NA	-402.11	NA	TMEM17	NS	>999.999	0.077	0	>999.999	0.16	0	NA	NA	0	NA	NA	0	NA	NA	0	>999.999	0.21	0	0.98	0.469	1.267	0.137	0.914	0.199	1.067	0.878	0.998	0.953	1.345	0.0748
							exm197234	rs148417895	44.226	NA	EHBP1	NS	2.182	0.078	0.000596501	2.018	0.12	0.002097	NA	NA	0	NA	NA	0	>999.999	0.3	0	NA	NA	0	1.078	0.439	1.078	0.439	1.132	0.591	1.132	0.591	1.102	0.337	1.102	0.337
rs2028898	2	85777270	124	19	27	8	exm207700	rs146680370	145.236	NA	GNLY	NS	7.991	0.0017	0.000132538	8.318	0.0013	0.000466	NA	NA	0	NA	NA	0	NA	NA	0	NA	NA	0	0.963	0.183	1.27	0.14	0.971	0.672	1.785	0.0804	0.958	0.153	1.259	0.18
							exm207964	rs34302587	499.045	NA	POLR1A	NS	1.358	0.016	0.010338	1.379	0.013	0.03541	<0.001	0.48	0.001241	NA	NA	0	0.709	0.68	0.001152	>999.999	0.25	0	1.032	0.129	1.124	0.196	1.168	0.00154	1.122	0.604	1.012	0.599	1.068	0.499
							exm206978	rs116432107	-204.082	NA	RETSAT	NS	0.663	0.034	0.00676034	0.646	0.028	0.0233	<0.001	0.34	0.001241	NA	NA	0	3.033	0.32	0.000384	NA	NA	0	0.957	0.672	0.957	0.672	1.283	0.272	1.283	0.272	0.912	0.411	0.912	0.411
							exm206789	rs41288837	-246.154	0.002	TCF7L1	NS	0.746	0.049	0.00980782	0.936	0.84	0.00699	0.594	0.66	0.004963	NA	NA	0	0.735	0.24	0.01459	0.7	0.11	0.02259	1.019	0.783	0.889	0.227	1.057	0.727	1.115	0.618	0.975	0.721	0.846	0.113
							exm207094	rs146572548	-159.816	NA	ELMOD3	NS	>999.999	0.058	0	NA	NA	0	NA	NA	0	NA	NA	0	>999.999	0.21	0	>999.999	0.15	0	0.983	0.645	0.814	0.124	0.975	0.782	0.442	0.0654	0.982	0.651	0.903	0.46
							exm207496	rs184488528	58.856	0.001	C2orf68	NS	0.381	0.063	0.00139165	0.614	0.54	0.001631	NA	NA	0	NA	NA	0	>999.999	0.3	0	0.149	0.03	0.004162	0.844	0.207	0.844	0.207	0.852	0.643	0.852	0.643	0.81	0.149	0.81	0.149
							exm207737	rs138682636	204.119	NA	ATOH8	NS	>999.999	0.082	0	>999.999	0.087	0	NA	NA	0	NA	NA	0	NA	NA	0	NA	NA	0	0.62	0.121	0.62	0.121	0.807	0.764	0.807	0.764	0.627	0.153	0.627	0.153
							exm206835	rs4240199	-227.402	0.028	TGOLN2	ST	0.946	0.11	0.212061	0.93	0.26	0.2274	1.078	0.74	0.1328	0.751	0.028	0.05666	0.957	0.53	0.2277	1.001	0.99	0.3853	0.955	0.0329	0.844	0.174	0.939	0.224	0.771	0.424	0.963	0.0932	0.879	0.321
							exm207817	rs3731824	311.041	0	ST3GAL5	NS	0.943	0.11	0.177005	1.05	0.61	0.08201	1.418	0.044	0.1663	0.875	0.038	0.2584	0.955	0.56	0.1617	0.894	0.13	0.2152	0.942	0.105	0.673	0.559	0.823	0.0348	<0.001	0.464	0.967	0.379	0.522	0.407
							exm207243	rs1078004	-7.559	0.496	MAT2A	NS	0.961	0.15	0.486479	0.962	0.49	0.665	0.896	0.42	0.5074	0.986	0.81	0.3779	0.903	0.096	0.3798	0.993	0.9	0.4661	0.96	0.151	<0.001	0.553	0.837	0.00935	<0.001	0.832	0.977	0.424	<0.001	0.588
							exm207189	rs139067996	-115.026	NA	SH2D6	NS	<0.001	0.16	0.000265851	<0.001	0.41	0.0004666	NA	NA	0	<0.001	0.49	0.0002508	NA	NA	0	<0.001	0.45	0.0002973	0.835	0.221	0.835	0.221	0.481	0.14	0.481	0.14	0.89	0.445	0.89	0.445
							exm207263	NA	-0.19	NA	GGCX	NS	2.985	0.18	0.000132538	NA	NA	0	NA	NA	0	NA	NA	0	5.126	0.1	0.000384	<0.001	0.46	0.0002973	0.98	0.474	1.114	0.512	0.864	0.0378	0.958	0.918	0.997	0.933	1.181	0.33
							exm207589	rs137957308	90.863	NA	USP39	NS	<0.001	0.18	0.000198807	<0.001	0.5	0.000233	NA	NA	0	NA	NA	0	<0.001	0.34	0.000384	<0.001	0.48	0.0002973	0.666	0.13	0.666	0.13	0.302	0.209	0.302	0.209	0.754	0.304	0.754	0.304
							exm207654	rs35373464	115.638	NA	SFTPB	NS	0.599	0.19	0.00165673	0.839	0.72	0.003029	<0.001	0.34	0.002481	NA	NA	0	0.396	0.44	0.000768	0.466	0.32	0.002378	1	0.984	1.01	0.933	1.022	0.649	1.224	0.459	0.996	0.836	0.99	0.938
							exm207168	rs142150224	-148.27	NA	CAPG	NS	2.455	0.23	0.000198807	3.79	0.1	0.000466	NA	NA	0	NA	NA	0	NA	NA	0	<0.001	0.46	0.0002973	1.028	0.302	1.082	0.424	1.137	0.0472	1.211	0.389	1.017	0.541	1.102	0.344
							exm207455	rs149659522	47.322	NA	RNF181	ST	1.936	0.34	0.000265076	1.308	0.77	0.000699	NA	NA	0	4.87	0.17	0.0002485	NA	NA	0	NA	NA	0	1	0.99	1.464	0.327	0.964	0.674	4.605	0.00353	0.993	0.853	1.146	0.758
							exm207407	rs143955435	31.476	NA	VAMP8	NS	0.563	0.39	0.000596421	1.915	0.64	0.000233	2.091	0.61	0.001241	NA	NA	0	0.334	0.33	0.001152	<0.001	0.16	0.001189	0.563	0.391	0.563	0.391	<0.001	0.412	<0.001	0.412	0.675	0.561	0.675	0.561
							exm207419	rs143719255	42.799	NA	VAMP5	SP	<0.001	0.49	6.62691e-05	NA	NA	0	NA	NA	0	NA	NA	0	NA	NA	0	<0.001	0.47	0.0002973	<0.001	0.49	<0.001	0.49	<0.001	0.809	<0.001	0.809	<0.001	0.523	<0.001	0.523
							exm2028859	rs190809517	48.94	NA	TMEM150A	NS	1.418	0.52	0.000530152	1.413	0.56	0.001631	NA	NA	0	<0.001	0.59	0.0002485	>999.999	0.28	0	NA	NA	0	1.418	0.52	1.418	0.52	1.882	0.549	1.882	0.549	1.479	0.493	1.479	0.493
rs10187424	2	85794297	130	19	35	9	exm207700	rs146680370	128.209	NA	GNLY	NS	7.991	0.0017	0.000132538	8.318	0.0013	0.000466	NA	NA	0	NA	NA	0	NA	NA	0	NA	NA	0	0.963	0.183	1.27	0.14	0.971	0.672	1.785	0.0804	0.958	0.153	1.259	0.18
							exm207964	rs34302587	482.018	NA	POLR1A	NS	1.358	0.016	0.010338	1.379	0.013	0.03541	<0.001	0.48	0.001241	NA	NA	0	0.709	0.68	0.001152	>999.999	0.25	0	1.032	0.129	1.124	0.196	1.168	0.00154	1.122	0.604	1.012	0.599	1.068	0.499
							exm206978	rs116432107	-221.109	NA	RETSAT	NS	0.663	0.034	0.00676034	0.646	0.028	0.0233	<0.001	0.34	0.001241	NA	NA	0	3.033	0.32	0.000384	NA	NA	0	0.957	0.672	0.957	0.672	1.283	0.272	1.283	0.272	0.912	0.411	0.912	0.411
							exm206789	rs41288837	-263.181	0.004	TCF7L1	NS	0.746	0.049	0.00980782	0.936	0.84	0.00699	0.594	0.66	0.004963	NA	NA	0	0.735	0.24	0.01459	0.7	0.11	0.02259	1.019	0.783	0.889	0.227	1.057	0.727	1.115	0.618	0.975	0.721	0.846	0.113
							exm207094	rs146572548	-176.843	NA	ELMOD3	NS	>999.999	0.058	0	NA	NA	0	NA	NA	0	NA	NA	0	>999.999	0.21	0	>999.999	0.15	0	0.983	0.645	0.814	0.124	0.975	0.782	0.442	0.0654	0.982	0.651	0.903	0.46
							exm207496	rs184488528	41.829	0.001	C2orf68	NS	0.381	0.063	0.00139165	0.614	0.54	0.001631	NA	NA	0	NA	NA	0	>999.999	0.3	0	0.149	0.03	0.004162	0.844	0.207	0.844	0.207	0.852	0.643	0.852	0.643	0.81	0.149	0.81	0.149
							exm207737	rs138682636	187.092	NA	ATOH8	NS	>999.999	0.082	0	>999.999	0.087	0	NA	NA	0	NA	NA	0	NA	NA	0	NA	NA	0	0.62	0.121	0.62	0.121	0.807	0.764	0.807	0.764	0.627	0.153	0.627	0.153
							exm206835	rs4240199	-244.429	0.008	TGOLN2	ST	0.946	0.11	0.212061	0.93	0.26	0.2274	1.078	0.74	0.1328	0.751	0.028	0.05666	0.957	0.53	0.2277	1.001	0.99	0.3853	0.955	0.0329	0.844	0.174	0.939	0.224	0.771	0.424	0.963	0.0932	0.879	0.321
							exm207817	rs3731824	294.014	0.003	ST3GAL5	NS	0.943	0.11	0.177005	1.05	0.61	0.08201	1.418	0.044	0.1663	0.875	0.038	0.2584	0.955	0.56	0.1617	0.894	0.13	0.2152	0.942	0.105	0.673	0.559	0.823	0.0348	<0.001	0.464	0.967	0.379	0.522	0.407
							exm207243	rs1078004	-24.586	0.853	MAT2A	NS	0.961	0.15	0.486479	0.962	0.49	0.665	0.896	0.42	0.5074	0.986	0.81	0.3779	0.903	0.096	0.3798	0.993	0.9	0.4661	0.96	0.151	<0.001	0.553	0.837	0.00935	<0.001	0.832	0.977	0.424	<0.001	0.588
							exm207189	rs139067996	-132.053	NA	SH2D6	NS	<0.001	0.16	0.000265851	<0.001	0.41	0.0004666	NA	NA	0	<0.001	0.49	0.0002508	NA	NA	0	<0.001	0.45	0.0002973	0.835	0.221	0.835	0.221	0.481	0.14	0.481	0.14	0.89	0.445	0.89	0.445
							exm207263	NA	-17.217	NA	GGCX	NS	2.985	0.18	0.000132538	NA	NA	0	NA	NA	0	NA	NA	0	5.126	0.1	0.000384	<0.001	0.46	0.0002973	0.98	0.474	1.114	0.512	0.864	0.0378	0.958	0.918	0.997	0.933	1.181	0.33
							exm207589	rs137957308	73.836	NA	USP39	NS	<0.001	0.18	0.000198807	<0.001	0.5	0.000233	NA	NA	0	NA	NA	0	<0.001	0.34	0.000384	<0.001	0.48	0.0002973	0.666	0.13	0.666	0.13	0.302	0.209	0.302	0.209	0.754	0.304	0.754	0.304
							exm207654	rs35373464	98.611	NA	SFTPB	NS	0.599	0.19	0.00165673	0.839	0.72	0.003029	<0.001	0.34	0.002481	NA	NA	0	0.396	0.44	0.000768	0.466	0.32	0.002378	1	0.984	1.01	0.933	1.022	0.649	1.224	0.459	0.996	0.836	0.99	0.938
							exm207168	rs142150224	-165.297	NA	CAPG	NS	2.455	0.23	0.000198807	3.79	0.1	0.000466	NA	NA	0	NA	NA	0	NA	NA	0	<0.001	0.46	0.0002973	1.028	0.302	1.082	0.424	1.137	0.0472	1.211	0.389	1.017	0.541	1.102	0.344
							exm207455	rs149659522	30.295	NA	RNF181	ST	1.936	0.34	0.000265076	1.308	0.77	0.000699	NA	NA	0	4.87	0.17	0.0002485	NA	NA	0	NA	NA	0	1	0.99	1.464	0.327	0.964	0.674	4.605	0.00353	0.993	0.853	1.146	0.758
							exm207407	rs143955435	14.449	NA	VAMP8	NS	0.563	0.39	0.000596421	1.915	0.64	0.000233	2.091	0.61	0.001241	NA	NA	0	0.334	0.33	0.001152	<0.001	0.16	0.001189	0.563	0.391	0.563	0.391	<0.001	0.412	<0.001	0.412	0.675	0.561	0.675	0.561
							exm207419	rs143719255	25.772	NA	VAMP5	SP	<0.001	0.49	6.62691e-05	NA	NA	0	NA	NA	0	NA	NA	0	NA	NA	0	<0.001	0.47	0.0002973	<0.001	0.49	<0.001	0.49	<0.001	0.809	<0.001	0.809	<0.001	0.523	<0.001	0.523
							exm2028859	rs190809517	31.913	NA	TMEM150A	NS	1.418	0.52	0.000530152	1.413	0.56	0.001631	NA	NA	0	<0.001	0.59	0.0002485	>999.999	0.28	0	NA	NA	0	1.418	0.52	1.418	0.52	1.882	0.549	1.882	0.549	1.479	0.493	1.479	0.493
rs12621278	2	173311553	36	6	15	1	exm242236	rs11895564	28.255	0.014	ITGA6	NS	1.092	0.0054	0.241516	1.064	0.26	0.3304	1.148	0.53	0.1017	1.153	0.079	0.1208	1.03	0.64	0.269	1.15	0.03	0.2848	1.075	0.017	0.961	0.799	1.067	0.371	1.35	0.369	1.079	0.0173	0.942	0.723
							exm242103	rs138869820	-380.545	NA	METAP1D	NS	2.876	0.08	0.000265076	3.17	0.32	0.000233	NA	NA	0	NA	NA	0	4.904	0.13	0.000384	1.969	0.49	0.0005945	1.031	0.524	0.799	0.404	1.025	0.831	0.635	0.529	1.02	0.695	0.814	0.47
							exm242360	rs146257365	120.073	NA	PDK1	NS	<0.001	0.096	0.000331345	<0.001	0.091	0.001165	NA	NA	0	NA	NA	0	NA	NA	0	NA	NA	0	1.041	0.816	1.041	0.816	1.103	0.818	1.103	0.818	1.077	0.68	1.077	0.68
							exm242054	rs141219661	-488.145	NA	HAT1	NS	<0.001	0.11	0.000331345	<0.001	0.1	0.001165	NA	NA	0	NA	NA	0	NA	NA	0	NA	NA	0	0.941	0.527	0.483	0.0232	1.133	0.586	<0.001	0.0985	0.898	0.298	0.535	0.0611
							exm242167	NA	-346.127	NA	DLX2	NS	<0.001	0.12	0.000265393	<0.001	0.25	0.0006996	NA	NA	0	NA	NA	0	<0.001	0.33	0.000384	NA	NA	0	0.437	0.188	0.437	0.188	1.218	0.85	1.218	0.85	0.348	0.15	0.348	0.15
							exm242525	NA	580.302	NA	RAPGEF4	NS	>999.999	0.11	0	NA	NA	0	NA	NA	0	NA	NA	0	NA	NA	0	>999.999	0.15	0	1.039	0.785	1.039	0.785	0.646	0.296	0.646	0.296	1.084	0.578	1.084	0.578
rs7584330	2	238387228	178	9	59	4	exm279472	rs2292884	55.998	0.631	MLPH	NS	1.093	0.003	0.339231	1.121	0.034	0.5389	1.07	0.69	0.2196	1.092	0.16	0.2582	1.082	0.23	0.2834	1.078	0.26	0.2533	1.014	0.234	1.031	0.7	1.041	0.132	0.935	0.738	1.011	0.36	1.037	0.666
							exm279291	rs139498556	-97.311	NA	COL6A3	NS	>999.999	0.0047	0	>999.999	0.074	0	NA	NA	0	NA	NA	0	NA	NA	0	>999.999	0.046	0	1.015	0.316	1.055	0.23	1.034	0.351	0.993	0.949	1.009	0.576	1.074	0.125
							exm279971	rs149063837	494.589	NA	UBE2F	NS	>999.999	0.023	0	>999.999	0.16	0	NA	NA	0	NA	NA	0	>999.999	0.36	0	>999.999	0.14	0	>999.999	0.0103	>999.999	0.0103		NA		NA	>999.999	0.025	>999.999	0.025
							exm279773	rs115185043	285.295	NA	LRRFIP1	NS	>999.999	0.028	0	>999.999	0.073	0	NA	NA	0	>999.999	0.2	0	NA	NA	0	NA	NA	0	0.994	0.678	1.119	0.333	0.984	0.644	1.408	0.178	0.994	0.664	1.101	0.435
							exm279818	rs73086770	338.605	0.005	RBM44	NS	0.841	0.04	0.0327499	0.843	0.052	0.1075	NA	NA	0	NA	NA	0	0.969	0.92	0.008455	0.365	0.18	0.00327	0.95	0.18	0.971	0.795	1.048	0.611	1.343	0.224	0.931	0.0805	0.939	0.607
							exm279596	rs141367631	107.491	NA	RAB17	NS	>999.999	0.056	0	>999.999	0.062	0	NA	NA	0	NA	NA	0	NA	NA	0	NA	NA	0	0.988	0.471	1.243	0.2	0.996	0.912	0.364	0.138	0.984	0.352	1.373	0.0681
							exm2237356	NA	88.05	NA	PRLH	NS	2.501	0.16	0.000265076	NA	NA	0	>999.999	0.21	0	2.036	0.31	0.000994	NA	NA	0	NA	NA	0	1.15	0.742	1.15	0.742	2.189	0.289	2.189	0.289	1.042	0.93	1.042	0.93
							exm279929	rs61758799	433.151	NA	RAMP1	NS	2.168	0.18	0.000331345	2.329	0.26	0.000699	NA	NA	0	NA	NA	0	0.821	0.89	0.000384	3.529	0.27	0.0002973	1.629	0.177	1.629	0.177	2.038	0.336	2.038	0.336	1.539	0.262	1.539	0.262
							exm278691	rs115111928	-389.94	NA	COPS8	NS	0.871	0.66	0.00205434	0.853	0.64	0.006524	NA	NA	0	1.803	0.55	0.000497	<0.001	0.35	0.000384	NA	NA	0	0.837	0.549	0.837	0.549	<0.001	0.137	<0.001	0.137	0.949	0.864	0.949	0.864
rs2292884	2	238443226	178	9	33	3	exm279472	rs2292884	0	NA	MLPH	NS	1.093	0.003	0.339231	1.121	0.034	0.5389	1.07	0.69	0.2196	1.092	0.16	0.2582	1.082	0.23	0.2834	1.078	0.26	0.2533	1.014	0.234	1.031	0.7	1.041	0.132	0.935	0.738	1.011	0.36	1.037	0.666
							exm279291	rs139498556	-153.309	NA	COL6A3	NS	>999.999	0.0047	0	>999.999	0.074	0	NA	NA	0	NA	NA	0	NA	NA	0	>999.999	0.046	0	1.015	0.316	1.055	0.23	1.034	0.351	0.993	0.949	1.009	0.576	1.074	0.125
							exm279971	rs149063837	438.591	NA	UBE2F	NS	>999.999	0.023	0	>999.999	0.16	0	NA	NA	0	NA	NA	0	>999.999	0.36	0	>999.999	0.14	0	>999.999	0.0103	>999.999	0.0103		NA		NA	>999.999	0.025	>999.999	0.025
							exm279773	rs115185043	229.297	NA	LRRFIP1	NS	>999.999	0.028	0	>999.999	0.073	0	NA	NA	0	>999.999	0.2	0	NA	NA	0	NA	NA	0	0.994	0.678	1.119	0.333	0.984	0.644	1.408	0.178	0.994	0.664	1.101	0.435
							exm279818	rs73086770	282.607	0.005	RBM44	NS	0.841	0.04	0.0327499	0.843	0.052	0.1075	NA	NA	0	NA	NA	0	0.969	0.92	0.008455	0.365	0.18	0.00327	0.95	0.18	0.971	0.795	1.048	0.611	1.343	0.224	0.931	0.0805	0.939	0.607
							exm279596	rs141367631	51.493	NA	RAB17	NS	>999.999	0.056	0	>999.999	0.062	0	NA	NA	0	NA	NA	0	NA	NA	0	NA	NA	0	0.988	0.471	1.243	0.2	0.996	0.912	0.364	0.138	0.984	0.352	1.373	0.0681
							exm2237356	NA	32.052	NA	PRLH	NS	2.501	0.16	0.000265076	NA	NA	0	>999.999	0.21	0	2.036	0.31	0.000994	NA	NA	0	NA	NA	0	1.15	0.742	1.15	0.742	2.189	0.289	2.189	0.289	1.042	0.93	1.042	0.93
							exm279929	rs61758799	377.153	NA	RAMP1	NS	2.168	0.18	0.000331345	2.329	0.26	0.000699	NA	NA	0	NA	NA	0	0.821	0.89	0.000384	3.529	0.27	0.0002973	1.629	0.177	1.629	0.177	2.038	0.336	2.038	0.336	1.539	0.262	1.539	0.262
							exm278691	rs115111928	-445.938	NA	COPS8	NS	0.871	0.66	0.00205434	0.853	0.64	0.006524	NA	NA	0	1.803	0.55	0.000497	<0.001	0.35	0.000384	NA	NA	0	0.837	0.549	0.837	0.549	<0.001	0.137	<0.001	0.137	0.949	0.864	0.949	0.864
rs3771570	2	242382864	271	19	36	3	exm283174	rs185349960	-412.977	NA	SNED1	NS	5.45	0.00035	0.000331345	1.991	0.49	0.000466	NA	NA	0	6.503	0.0014	0.0007455	NA	NA	0	>999.999	0.11	0	1.034	0.121	1.249	0.0219	1.034	0.535	1.613	0.0198	1.036	0.122	1.186	0.101
							exm283584	rs141663644	-317.11	NA	PASK	NS	5.197	0.00048	0.000331345	4.98	0.00069	0.001165	NA	NA	0	NA	NA	0	NA	NA	0	NA	NA	0	1.001	0.934	1.061	0.398	0.981	0.563	1.181	0.299	1.007	0.64	1.031	0.682
							exm284006	rs146605967	-232.885	NA	ANO7	ST	>999.999	0.0064	0	>999.999	0.084	0	NA	NA	0	NA	NA	0	NA	NA	0	>999.999	0.047	0	1.007	0.741	1.065	0.346	0.961	0.465	1.141	0.4	1.013	0.594	1.058	0.427
							exm284521	rs189711563	46.562	NA	FARP2	NS	6.168	0.011	0.000132538	>999.999	0.15	0	NA	NA	0	NA	NA	0	5.814	0.076	0.000384	3.993	0.22	0.0002973	1.032	0.388	1.285	0.0114	1.112	0.218	1.598	0.0254	1.017	0.657	1.258	0.0293
							exm283454	rs35437554	-343.879	NA	MTERFD2	NS	0.319	0.018	0.00125911	NA	NA	0	<0.001	0.18	0.002481	NA	NA	0	0.305	0.03	0.004992	0.529	0.56	0.001189	0.999	0.962	0.822	0.153	0.949	0.32	0.936	0.841	1.007	0.749	0.795	0.119
							exm284853	rs7601000	227.909	0.021	ATG4B	NS	0.92	0.023	0.177847	1.034	0.74	0.08178	0.969	0.87	0.1608	0.911	0.15	0.2475	0.92	0.28	0.172	0.869	0.054	0.2256	0.942	0.0643	0.93	0.606	0.979	0.788	0.752	0.438	0.928	0.0292	0.941	0.682
							exm284279	rs144379709	-178.849	0.054	HDLBP	NS	1.625	0.026	0.00311465	1.377	0.55	0.002097	4.094	0.12	0.002481	NA	NA	0	1.209	0.77	0.00192	1.636	0.066	0.009215	0.97	0.427	1.173	0.124	1.07	0.452	1.679	0.0173	0.949	0.193	1.095	0.416
							exm285006	rs142624021	307.838	NA	D2HGDH	NS	>999.999	0.038	0	NA	NA	0	>999.999	0.03	0	NA	NA	0	>999.999	0.34	0	NA	NA	0	0.968	0.0734	0.88	0.378	0.933	0.118	1.007	0.985	0.975	0.185	0.869	0.365
							exm284780	NA	190.406	NA	THAP4	NS	4.934	0.045	0.000132538	NA	NA	0	NA	NA	0	6.061	0.022	0.000497	NA	NA	0	NA	NA	0	0.992	0.79	1.091	0.659	0.955	0.514	0.883	0.811	0.994	0.85	1.179	0.419
							exm285359	rs28378061	431.496	0.004	C2orf85	NS	1.067	0.051	0.322651	1.16	0.025	0.1829	0.912	0.53	0.4305	1.064	0.29	0.6663	1.025	0.71	0.2723	1.031	0.76	0.1033	1.016	0.24	0.925	0.326	1.019	0.558	0.823	0.343	1.014	0.341	0.942	0.476
							exm285162	rs143024300	372.87	NA	NEU4	NS	0.274	0.068	0.00092789	0.295	0.089	0.003029	<0.001	0.58	0.001241	NA	NA	0	NA	NA	0	NA	NA	0	1.091	0.575	1.091	0.575	1.19	0.639	1.19	0.639	1.07	0.681	1.07	0.681
							exm283820	rs116243166	-273.658	0	PPP1R7	NS	<0.001	0.082	0.000397614	<0.001	0.31	0.000466	NA	NA	0	NA	NA	0	NA	NA	0	<0.001	0.17	0.001189	1.216	0.497	1.216	0.497	0.527	0.523	0.527	0.523	1.378	0.273	1.378	0.273
							exm285299	rs56124337	412.038	NA	PDCD1	NS	<0.001	0.17	0.000198807	NA	NA	0	NA	NA	0	NA	NA	0	<0.001	0.28	0.000384	<0.001	0.3	0.0005945	1.025	0.544	1.035	0.912	1.077	0.439	1.804	0.331	1.023	0.601	1.023	0.947
							exm285072	rs117755329	333.523	NA	GAL3ST2	NS	0.829	0.2	0.0107356	NA	NA	0	0.455	0.24	0.01613	0.885	0.43	0.03579	1.285	0.86	0.000384	<0.001	0.12	0.001189	0.986	0.572	0.898	0.271	1.037	0.549	1.012	0.96	0.983	0.51	0.884	0.237
							exm284683	rs149999244	126.7	NA	BOK	NS	<0.001	0.26	0.000198807	<0.001	0.34	0.000466	NA	NA	0	NA	NA	0	NA	NA	0	<0.001	0.48	0.0002973	1.02	0.648	0.981	0.886	0.966	0.743	0.927	0.811	1.027	0.555	0.974	0.855
							exm284919	rs150199953	268.595	NA	ING5	NS	<0.001	0.31	0.000132538	NA	NA	0	NA	NA	0	NA	NA	0	NA	NA	0	<0.001	0.3	0.0005945	0.532	0.563	0.532	0.563	<0.001	0.64	<0.001	0.64	0.631	0.679	0.631	0.679
							exm284332	rs149773653	-93.28	0.002	SEPT2	NS	1.272	0.45	0.001723	0.857	0.85	0.001165	NA	NA	0	2.257	0.56	0.0002485	0.598	0.67	0.000768	1.386	0.37	0.005351	1.191	0.566	1.191	0.566	1.709	0.377	1.709	0.377	1.182	0.603	1.182	0.603
							exm284578	NA	52.217	NA	STK25	NS	<0.001	0.45	6.62954e-05	NA	NA	0	NA	NA	0	NA	NA	0	NA	NA	0	<0.001	0.47	0.0002973	0.765	0.533	0.765	0.533	0.996	0.997	0.996	0.997	0.791	0.602	0.791	0.602
							exm284869	rs149298120	232.771	NA	DTYMK	NS	1.453	0.71	0.000132538	0.88	0.92	0.000466	NA	NA	0	NA	NA	0	>999.999	0.36	0	NA	NA	0	1.453	0.712	1.453	0.712	<0.001	0.731	<0.001	0.731	1.756	0.576	1.756	0.576
rs2660753	3	87110674	14	3	3	1	exm331412	rs79345443	-92.575	0.008	VGLL3	NS	0.643	0.037	0.00530152	0.883	0.8	0.003262	<0.001	0.34	0.001241	>999.999	0.19	0	0.458	0.086	0.006144	0.653	0.13	0.01457	0.639	0.02	0.639	0.02	0.568	0.264	0.568	0.264	0.681	0.0555	0.681	0.0555
							exm331451	rs192188850	184.281	NA	CHMP2B	NS	>999.999	0.053	0	NA	NA	0	NA	NA	0	NA	NA	0	>999.999	0.056	0	NA	NA	0	1.473	0.0125	1.473	0.0125	1.404	0.367	1.404	0.367	1.513	0.0108	1.513	0.0108
							exm331490	rs138356138	202.866	NA	POU1F1	NS	4.392	0.074	0.000132538	NA	NA	0	1.531	0.74	0.002481	NA	NA	0	>999.999	0.089	0	>999.999	0.19	0	1.32	0.2	1.32	0.2	1.34	0.576	1.34	0.576	1.282	0.281	1.282	0.281
rs7611694	3	113275624	196	10	53	3	exm338609	NA	51.319	NA	SIDT1	NS	>999.999	0.0075	0	NA	NA	0	NA	NA	0	NA	NA	0	>999.999	0.01	0	NA	NA	0	1.072	0.068	1.174	0.0582	1.066	0.483	1.052	0.813	1.071	0.0887	1.194	0.0468
							exm339192	rs143587881	445.693	NA	KIAA1407	NS	5.063	0.0084	0.000198807	4.418	0.02	0.000699	NA	NA	0	NA	NA	0	>999.999	0.24	0	NA	NA	0	1.024	0.699	1.143	0.0761	0.994	0.969	1.029	0.879	1.038	0.567	1.17	0.0472
							exm338061	rs145076589	-283.484	NA	BOC	NS	4.459	0.018	0.000198886	1.055	0.97	0.0004664	NA	NA	0	NA	NA	0	>999.999	0.069	0	7.46	0.036	0.0002973	0.961	0.372	0.996	0.959	1.015	0.89	1.105	0.559	0.949	0.262	0.971	0.702
							exm339110	rs72954683	397.255	NA	ZDHHC23	NS	1.348	0.02	0.0100729	1.322	0.035	0.03425	1.973	0.65	0.001241	NA	NA	0	1.613	0.46	0.001536	NA	NA	0	1.058	0.0403	0.745	0.359	0.983	0.795	0.497	0.483	1.073	0.0152	0.759	0.416
							exm2238348	rs3204024	390.396	0.001	GRAMD1C	SP	0.945	0.045	0.371073	0.892	0.04	0.3555	0.982	0.9	0.3846	0.934	0.23	0.3767	0.993	0.91	0.3783	0.98	0.74	0.3754	0.941	0.0203	0.873	0.124	0.893	0.0811	1.271	0.215	0.942	0.0319	0.855	0.0956
							exm338728	rs75025102	99.453	0.001	KIAA2018	NS	1.167	0.055	0.0257787	1.099	0.55	0.02796	0.363	0.18	0.01737	NA	NA	0	1.294	0.063	0.03955	1.133	0.35	0.04518	0.999	0.979	1.064	0.441	0.923	0.258	0.931	0.735	1.004	0.902	1.076	0.384
							exm338269	rs150147481	-190.635	NA	WDR52	NS	>999.999	0.085	0	>999.999	0.13	0	NA	NA	0	NA	NA	0	NA	NA	0	NA	NA	0	1.005	0.711	1.09	0.231	1.042	0.154	1.112	0.545	0.999	0.931	1.088	0.268
							exm338437	rs139574129	-96.127	NA	SPICE1	NS	>999.999	0.09	0	>999.999	0.17	0	NA	NA	0	NA	NA	0	>999.999	0.39	0	NA	NA	0	1.004	0.922	0.845	0.104	1.073	0.45	0.943	0.81	0.995	0.911	0.834	0.103
							exm338945	rs142398138	227.645	NA	ATP6V1A	NS	4.074	0.2	6.62691e-05	NA	NA	0	NA	NA	0	NA	NA	0	2.516	0.46	0.000384	>999.999	0.17	0	1.575	0.525	1.575	0.525	4.214	0.166	4.214	0.166	1.358	0.693	1.358	0.693
							exm338917	rs139872941	165.029	NA	NAA50	NS	2.103	0.6	6.62691e-05	NA	NA	0	NA	NA	0	NA	NA	0	NA	NA	0	2.006	0.62	0.0002973	0.985	0.907	2.103	0.595	0.863	0.656	<0.001	0.813	0.966	0.805	2.485	0.511
rs10934853	3	128038373	53	7	10	1	exm348233	rs145019605	253.961	NA	C3orf27	NS	3.202	0.019	0.000397614	NA	NA	0	<0.001	0.18	0.002481	NA	NA	0	>999.999	0.29	0	4.327	0.0081	0.001189	0.969	0.878	0.969	0.878	0.899	0.837	0.899	0.837	0.975	0.906	0.975	0.906
							exm348035	NA	21.835	NA	EEFSEC	NS	>999.999	0.038	0	NA	NA	0	NA	NA	0	NA	NA	0	NA	NA	0	>999.999	0.05	0	1.001	0.987	1.126	0.393	0.954	0.845	1.062	0.862	1.011	0.908	1.111	0.475
							exm348217	rs143590990	167.381	NA	GATA2	NS	<0.001	0.055	0.000463883	<0.001	0.28	0.000466	NA	NA	0	NA	NA	0	<0.001	0.45	0.000384	<0.001	0.16	0.001189	1.023	0.847	0.276	0.2	0.997	0.992	<0.001	0.512	1.006	0.962	0.328	0.275
							exm347874	rs189713971	-391.6	0.003	KBTBD12	NS	6.573	0.057	6.62691e-05	NA	NA	0	NA	NA	0	NA	NA	0	>999.999	0.19	0	3.783	0.24	0.0002973	0.993	0.796	1.18	0.146	1.035	0.612	1.093	0.748	0.991	0.768	1.178	0.174
							exm348102	NA	143.118	NA	DNAJB8	NS	<0.001	0.057	0.000397614	<0.001	0.45	0.000233	<0.001	0.31	0.001241	<0.001	0.11	0.000994	NA	NA	0	NA	NA	0	0.982	0.82	0.847	0.196	0.915	0.677	0.701	0.322	0.988	0.89	0.854	0.248
							exm348333	rs144093169	331.224	NA	RPN1	NS	1.246	0.14	0.0074884	1.29	0.11	0.02377	<0.001	0.45	0.001241	NA	NA	0	0.881	0.82	0.003072	2.635	0.27	0.0005945	1.008	0.936	1.008	0.936	0.599	0.0985	0.599	0.0985	1.061	0.572	1.061	0.572
							exm347821	rs140105585	-597.02	NA	MGLL	NS	1.908	0.22	0.000463883	1.948	0.21	0.001631	NA	NA	0	NA	NA	0	NA	NA	0	NA	NA	0	1.116	0.424	1.116	0.424	1.131	0.698	1.131	0.698	1.156	0.314	1.156	0.314
rs6763931	3	141102833	48	6	17	2	exm355570	rs33928105	432.775	0	GRK7	NS	0.904	0.058	0.0761936	0.887	0.21	0.09487	0.832	0.58	0.04591	0.958	0.9	0.00721	0.966	0.74	0.08109	0.869	0.11	0.1384	0.963	0.134	1.053	0.653	1.01	0.863	1.026	0.926	0.953	0.0725	1.047	0.702
							exm355264	rs34512847	-90.974	NA	ACPL2	NS	1.587	0.062	0.00251822	1.54	0.085	0.008621	NA	NA	0	NA	NA	0	1.755	0.69	0.000384	NA	NA	0	1.084	0.596	1.084	0.596	1.26	0.513	1.26	0.513	1.11	0.512	1.11	0.512
							exm355383	NA	61.596	NA	ZBTB38	NS	0.178	0.063	0.000662691	<0.001	0.037	0.001864	NA	NA	0	<0.001	0.35	0.000497	>999.999	0.27	0	NA	NA	0	1.008	0.689	0.955	0.622	1.021	0.643	0.973	0.906	1.011	0.572	0.952	0.619
							exm355128	rs144878842	-427.333	NA	SLC25A36	NS	>999.999	0.11	0	NA	NA	0	NA	NA	0	NA	NA	0	NA	NA	0	>999.999	0.15	0	1.032	0.909	1.032	0.909	1.935	0.207	1.935	0.207	0.922	0.794	0.922	0.794
							exm355471	rs141310259	225.51	NA	RASA2	NS	2.115	0.45	0.000132538	1.054	0.97	0.000466	>999.999	0.041	0	NA	NA	0	NA	NA	0	NA	NA	0	1.009	0.724	1.189	0.526	1.083	0.204	0.413	0.37	1	0.988	1.366	0.257
							exm2039784	rs139284721	-317.705	NA	SPSB4	NS	1.272	0.46	0.00145792	1.126	0.73	0.004893	NA	NA	0	NA	NA	0	3.542	0.24	0.000384	NA	NA	0	1.013	0.941	1.013	0.941	0.348	0.125	0.348	0.125	1.123	0.514	1.123	0.514
rs10936632	3	170130102	66	9	24	3	exm364308	rs114883808	68.84	0	SLC7A14	NS	0.565	0.0092	0.00550033	0.138	0.025	0.003495	<0.001	0.22	0.004963	>999.999	0.32	0	0.431	0.076	0.00576	0.766	0.32	0.01457	1.014	0.797	0.855	0.0852	0.948	0.706	0.566	0.0352	1.009	0.875	0.852	0.0969
							exm363878	rs145189663	-485.199	NA	SAMD7	NS	2.202	0.051	0.00072896	2.91	0.015	0.001864	NA	NA	0	NA	NA	0	0.5	0.57	0.000768	<0.001	0.45	0.0002973	0.956	0.236	1.133	0.394	0.821	0.041	0.781	0.559	0.984	0.69	1.165	0.323
							exm364120	rs55683301	-130.432	0.018	PRKCI	SP	1.181	0.054	0.025116	0.885	0.72	0.006291	0.781	0.46	0.04963	1.118	0.32	0.05915	1.001	1	0.009217	1.906	0.0013	0.01486	1.196	0.035	2.078	0.184	1.253	0.253	<0.001	0.522	1.159	0.103	2.507	0.0912
							exm364172	NA	-51.21	NA	SKIL	NS	6.32	0.065	6.62691e-05	>999.999	0.16	0	<0.001	0.48	0.001241	NA	NA	0	>999.999	0.19	0	>999.999	0.18	0	0.957	0.177	1.125	0.512	0.981	0.803	0.899	0.82	0.951	0.142	1.151	0.459
							exm363952	rs150302517	-328.244	NA	GPR160	NS	>999.999	0.12	0	>999.999	0.11	0	NA	NA	0	NA	NA	0	NA	NA	0	NA	NA	0	1.243	0.0606	1.243	0.0606	1.246	0.43	1.246	0.43	1.246	0.072	1.246	0.072
							exm364046	NA	-282.977	NA	PHC3	NS	0.391	0.13	0.000928013	0.401	0.14	0.003263	NA	NA	0	NA	NA	0	NA	NA	0	NA	NA	0	1.049	0.569	1.074	0.531	0.754	0.248	0.666	0.233	1.065	0.478	1.129	0.305
							exm364226	rs146493095	20.258	0.003	CLDN11	NS	0.359	0.34	0.000265076	<0.001	0.48	0.000233	NA	NA	0	NA	NA	0	<0.001	0.15	0.000768	1.914	0.64	0.0002973	0.359	0.343	0.359	0.343	<0.001	0.567	<0.001	0.567	0.428	0.441	0.428	0.441
							exm2043781	rs139790884	455.725	NA	RPL22L1	NS	1.514	0.49	0.000331345	NA	NA	0	NA	NA	0	1.558	0.47	0.001243	NA	NA	0	NA	NA	0	0.962	0.776	1.294	0.612	1.166	0.612	1.877	0.549	0.914	0.539	1.291	0.633
							exm363906	rs78992980	-436.651	0.001	SEC62	NS	<0.001	0.57	6.62691e-05	NA	NA	0	NA	NA	0	NA	NA	0	NA	NA	0	<0.001	0.52	0.0002973	0.944	0.639	0.944	0.639	1.048	0.87	1.048	0.87	0.89	0.382	0.89	0.382
rs1894292	4	74349158	85	10	52	4	exm405961	rs139503118	258.17	NA	IL8	NS	0.216	0.027	0.00092789	0.331	0.14	0.002331	NA	NA	0	NA	NA	0	<0.001	0.071	0.001536	NA	NA	0	0.377	0.0424	0.377	0.0424	<0.001	0.224	<0.001	0.224	0.449	0.1	0.449	0.1
							exm406017	rs140256823	370.446	NA	PF4V1	NS	>999.999	0.054	0	>999.999	0.17	0	>999.999	0.036	0	NA	NA	0	NA	NA	0	NA	NA	0	0.965	0.902	0.965	0.902	0.824	0.793	0.824	0.793	1.032	0.917	1.032	0.917
							exm405901	rs72649118	98.772	0.014	RASSF6	NS	0.751	0.057	0.00960901	0.565	0.11	0.008388	0.251	0.17	0.009926	NA	NA	0	0.826	0.48	0.01229	0.827	0.39	0.02051	0.999	0.968	0.88	0.213	0.951	0.401	0.818	0.45	1.01	0.702	0.872	0.213
							exm405717	rs35765619	-41.069	0.009	AFP	NS	0.715	0.072	0.00616302	0.746	0.62	0.002563	0.964	0.98	0.003722	<0.001	0.45	0.0002485	0.608	0.12	0.01037	0.801	0.39	0.01516	0.957	0.428	0.903	0.35	0.917	0.535	1	0.999	0.951	0.401	0.883	0.286
							exm405844	NA	8.614	NA	AFM	ST	<0.001	0.077	0.000463883	<0.001	0.57	0.000233	NA	NA	0	<0.001	0.27	0.000497	NA	NA	0	<0.001	0.17	0.001189	1.016	0.74	0.955	0.635	0.98	0.861	0.868	0.583	1.019	0.699	0.964	0.725
							exm405651	rs77514449	-67.182	NA	ALB	NS	<0.001	0.1	0.000331345	<0.001	0.15	0.000932	NA	NA	0	<0.001	0.46	0.0002485	NA	NA	0	NA	NA	0	0.926	0.694	0.926	0.694	0.38	0.162	0.38	0.162	0.964	0.859	0.964	0.859
							exm405525	rs149821540	-343.56	NA	ANKRD17	NS	>999.999	0.18	0	NA	NA	0	NA	NA	0	NA	NA	0	NA	NA	0	>999.999	0.16	0	1.137	0.629	1.137	0.629	2.69	0.0221	2.69	0.0221	1.026	0.929	1.026	0.929
							exm405342	rs137890258	-425.157	NA	COX18	NS	<0.001	0.22	0.000132538	<0.001	0.47	0.000233	NA	NA	0	NA	NA	0	<0.001	0.31	0.000384	NA	NA	0	0.977	0.867	0.977	0.867	1.101	0.766	1.101	0.766	0.933	0.639	0.933	0.639
							exm2078920	rs116796864	498.44	NA	PF4	NS	0.634	0.49	0.000596421	NA	NA	0	NA	NA	0	0.78	0.72	0.00174	NA	NA	0	<0.001	0.27	0.0005945	0.634	0.493	0.634	0.493	2	0.505	2	0.505	0.486	0.349	0.486	0.349
							exm405990	rs140549348	353.793	NA	CXCL6	NS	1.001	0.99	0.00205434	1.039	0.9	0.00699	NA	NA	0	NA	NA	0	<0.001	0.5	0.000384	NA	NA	0	1.001	0.995	1.001	0.995	1.699	0.359	1.699	0.359	0.997	0.994	0.997	0.994
rs12500426	4	95514609	40	3	15	1	exm414316	rs2452600	-17.727	0.378	PDLIM5	NS	0.93	0.019	0.301976	0.944	0.45	0.1545	0.788	0.093	0.3524	0.895	0.044	0.4609	1.004	0.95	0.2596	0.904	0.12	0.3209	0.986	0.549	1.102	0.26	1.055	0.36	1.173	0.424	0.983	0.493	1.107	0.261
							exm414279	rs118137678	-284.816	NA	HPGDS	NS	6.573	0.062	6.62691e-05	>999.999	0.24	0	>999.999	0.3	0	1.821	0.67	0.0002485	NA	NA	0	NA	NA	0	0.987	0.815	0.971	0.729	0.864	0.35	0.748	0.254	1.002	0.976	0.987	0.885
							exm414180	rs149019191	-359.461	0.002	SMARCAD1	NS	2.01	0.099	0.00072896	1.989	0.1	0.002563	NA	NA	0	NA	NA	0	NA	NA	0	NA	NA	0	0.982	0.291	0.861	0.261	1.011	0.782	0.881	0.701	0.978	0.213	0.9	0.448
rs17021918	4	95562877	50	4	14	1	exm414316	rs2452600	-65.995	0.698	PDLIM5	NS	0.93	0.019	0.301976	0.944	0.45	0.1545	0.788	0.093	0.3524	0.895	0.044	0.4609	1.004	0.95	0.2596	0.904	0.12	0.3209	0.986	0.549	1.102	0.26	1.055	0.36	1.173	0.424	0.983	0.493	1.107	0.261
							exm414447	NA	489.611	NA	BMPR1B	NS	>999.999	0.04	0	>999.999	0.21	0	NA	NA	0	>999.999	0.23	0	>999.999	0.28	0	NA	NA	0	1.059	0.769	1.059	0.769	0.682	0.516	0.682	0.516	1.151	0.489	1.151	0.489
							exm414279	rs118137678	-333.084	NA	HPGDS	NS	6.573	0.062	6.62691e-05	>999.999	0.24	0	>999.999	0.3	0	1.821	0.67	0.0002485	NA	NA	0	NA	NA	0	0.987	0.815	0.971	0.729	0.864	0.35	0.748	0.254	1.002	0.976	0.987	0.885
							exm414180	rs149019191	-407.729	0.002	SMARCAD1	NS	2.01	0.099	0.00072896	1.989	0.1	0.002563	NA	NA	0	NA	NA	0	NA	NA	0	NA	NA	0	0.982	0.291	0.861	0.261	1.011	0.782	0.881	0.701	0.978	0.213	0.9	0.448
rs7679673	4	106061534	46	3	22	1	exm417038	rs62623390	135.236	0.002	TET2	NS	0.462	0.023	0.00245195	1.101	0.9	0.001165	0.692	0.76	0.003722	NA	NA	0	0.74	0.61	0.002688	0.169	0.0066	0.00654	0.995	0.794	0.936	0.244	0.992	0.877	0.954	0.734	0.995	0.808	0.934	0.255
							exm417151	rs148016102	412.563	NA	ARHGEF38	ST	2.391	0.038	0.000596421	<0.001	0.5	0.000233	<0.001	0.63	0.001241	NA	NA	0	2.077	0.24	0.001536	4.688	0.015	0.0008918	0.975	0.583	1.298	0.0261	1.076	0.496	1.093	0.778	0.96	0.393	1.342	0.016
							exm417073	rs148492084	258.716	NA	PPA2	NS	1.356	0.085	0.0053742	1.356	0.09	0.01843	NA	NA	0	NA	NA	0	1.08	0.94	0.0007686	NA	NA	0	0.99	0.736	1.067	0.589	0.92	0.247	1.401	0.195	1.004	0.907	1.019	0.886
rs2242652	5	1280028	152	11	70	4	exm441088	rs147991614	-429.333	NA	ZDHHC11	NS	>999.999	0.015	0	>999.999	0.014	0	NA	NA	0	NA	NA	0	NA	NA	0	NA	NA	0	1.083	0.377	1.135	0.629	1.13	0.573	1.234	0.722	1.09	0.372	1.058	0.845
							exm441900	NA	-40.451	NA	SLC6A18	ST	>999.999	0.015	0	NA	NA	0	>999.999	0.28	0	NA	NA	0	NA	NA	0	>999.999	0.053	0	1.01	0.459	0.923	0.16	1.027	0.433	1.009	0.95	1.006	0.709	0.919	0.163
							exm441316	rs76030494	-244.473	NA	NKD2	NS	1.374	0.032	0.00768823	1.433	0.02	0.02448	NA	NA	0	NA	NA	0	1.118	0.83	0.003072	<0.001	0.2	0.0008918	1.083	0.413	1.083	0.413	1.179	0.468	1.179	0.468	1.041	0.702	1.041	0.702
							exm441466	rs737154	-214.629	0.008	SLC12A7	SP	0.945	0.042	0.43837	0.986	0.79	0.4888	0.761	0.051	0.5459	0.917	0.14	0.3417	0.961	0.5	0.4124	0.943	0.32	0.4839	0.969	0.0448	1.022	0.763	0.998	0.968	1.117	0.505	0.965	0.0338	0.998	0.974
							exm442293	rs28364997	123.1	NA	SLC6A3	NS	7.04	0.047	6.62691e-05	NA	NA	0	NA	NA	0	>999.999	0.05	0	>999.999	0.49	0	3.692	0.25	0.0002973	0.854	0.3	0.854	0.3	0.601	0.257	0.601	0.257	0.886	0.448	0.886	0.448
							exm442270	rs140467714	64.82	NA	CLPTM1L	NS	6.397	0.064	6.62691e-05	NA	NA	0	NA	NA	0	NA	NA	0	>999.999	0.19	0	3.908	0.23	0.0002973	0.882	0.151	0.881	0.272	1.219	0.285	1.224	0.409	0.846	0.075	0.835	0.147
							exm441685	rs147458082	-78.222	NA	SLC6A19	NS	1.328	0.075	0.0069601	1.082	0.89	0.002097	4.588	0.03	0.003722	1.223	0.25	0.02261	>999.999	0.39	0	1.083	0.95	0.0005949	1.029	0.382	1.137	0.296	1.141	0.0872	1.08	0.799	1.002	0.946	1.127	0.356
							exm442026	rs34528119	-15.441	NA	TERT	NS	0.485	0.11	0.00152419	NA	NA	0	NA	NA	0	0.747	0.55	0.003728	NA	NA	0	<0.001	0.035	0.002378	0.912	0.414	0.912	0.414	0.956	0.869	0.956	0.869	0.897	0.369	0.897	0.369
							exm2242824	NA	-393.318	NA	BRD9	NS	>999.999	0.13	0	NA	NA	0	NA	NA	0	>999.999	0.078	0	NA	NA	0	NA	NA	0	1.007	0.929	1.382	0.425	1.018	0.927	1.044	0.967	1.009	0.917	1.417	0.413
							exm442408	rs144081179	183.904	0	LPCAT1	NS	2.484	0.14	0.000265076	NA	NA	0	<0.001	0.66	0.001241	NA	NA	0	>999.999	0.0018	0	<0.001	0.2	0.0008918	0.907	0.446	0.907	0.446	0.969	0.921	0.969	0.921	0.914	0.51	0.914	0.51
							exm441220	rs144634558	-383.23	NA	TRIP13	NS	1.178	0.5	0.00298211	1.239	0.41	0.009087	NA	NA	0	NA	NA	0	0.318	0.16	0.00192	3.67	0.26	0.0002973	1.104	0.575	1.104	0.575	0.369	0.238	0.369	0.238	1.11	0.57	1.11	0.57
rs401681	5	1322087	147	12	58	4	exm441088	rs147991614	-471.392	NA	ZDHHC11	NS	>999.999	0.015	0	>999.999	0.014	0	NA	NA	0	NA	NA	0	NA	NA	0	NA	NA	0	1.083	0.377	1.135	0.629	1.13	0.573	1.234	0.722	1.09	0.372	1.058	0.845
							exm441900	NA	-82.51	NA	SLC6A18	ST	>999.999	0.015	0	NA	NA	0	>999.999	0.28	0	NA	NA	0	NA	NA	0	>999.999	0.053	0	1.01	0.459	0.923	0.16	1.027	0.433	1.009	0.95	1.006	0.709	0.919	0.163
							exm441316	rs76030494	-286.532	NA	NKD2	NS	1.374	0.032	0.00768823	1.433	0.02	0.02448	NA	NA	0	NA	NA	0	1.118	0.83	0.003072	<0.001	0.2	0.0008918	1.083	0.413	1.083	0.413	1.179	0.468	1.179	0.468	1.041	0.702	1.041	0.702
							exm441466	rs737154	-256.688	0.001	SLC12A7	SP	0.945	0.042	0.43837	0.986	0.79	0.4888	0.761	0.051	0.5459	0.917	0.14	0.3417	0.961	0.5	0.4124	0.943	0.32	0.4839	0.969	0.0448	1.022	0.763	0.998	0.968	1.117	0.505	0.965	0.0338	0.998	0.974
							exm442293	rs28364997	81.041	NA	SLC6A3	NS	7.04	0.047	6.62691e-05	NA	NA	0	NA	NA	0	>999.999	0.05	0	>999.999	0.49	0	3.692	0.25	0.0002973	0.854	0.3	0.854	0.3	0.601	0.257	0.601	0.257	0.886	0.448	0.886	0.448
							exm442270	rs140467714	22.761	NA	CLPTM1L	NS	6.397	0.064	6.62691e-05	NA	NA	0	NA	NA	0	NA	NA	0	>999.999	0.19	0	3.908	0.23	0.0002973	0.882	0.151	0.881	0.272	1.219	0.285	1.224	0.409	0.846	0.075	0.835	0.147
							exm441685	rs147458082	-120.281	NA	SLC6A19	NS	1.328	0.075	0.0069601	1.082	0.89	0.002097	4.588	0.03	0.003722	1.223	0.25	0.02261	>999.999	0.39	0	1.083	0.95	0.0005949	1.029	0.382	1.137	0.296	1.141	0.0872	1.08	0.799	1.002	0.946	1.127	0.356
							exm442026	rs34528119	-57.5	NA	TERT	NS	0.485	0.11	0.00152419	NA	NA	0	NA	NA	0	0.747	0.55	0.003728	NA	NA	0	<0.001	0.035	0.002378	0.912	0.414	0.912	0.414	0.956	0.869	0.956	0.869	0.897	0.369	0.897	0.369
							exm2242824	NA	-435.377	NA	BRD9	NS	>999.999	0.13	0	NA	NA	0	NA	NA	0	>999.999	0.078	0	NA	NA	0	NA	NA	0	1.007	0.929	1.382	0.425	1.018	0.927	1.044	0.967	1.009	0.917	1.417	0.413
							exm442408	rs144081179	141.845	0.003	LPCAT1	NS	2.484	0.14	0.000265076	NA	NA	0	<0.001	0.66	0.001241	NA	NA	0	>999.999	0.0018	0	<0.001	0.2	0.0008918	0.907	0.446	0.907	0.446	0.969	0.921	0.969	0.921	0.914	0.51	0.914	0.51
							exm442557	rs192286856	492.436	0.003	NDUFS6	NS	0.641	0.38	0.00072896	1.642	0.48	0.000932	NA	NA	0	NA	NA	0	0.239	0.057	0.002688	NA	NA	0	0.641	0.385	0.641	0.385	0.988	0.991	0.988	0.991	0.499	0.232	0.499	0.232
							exm441220	rs144634558	-425.289	NA	TRIP13	NS	1.178	0.5	0.00298211	1.239	0.41	0.009087	NA	NA	0	NA	NA	0	0.318	0.16	0.00192	3.67	0.26	0.0002973	1.104	0.575	1.104	0.575	0.369	0.238	0.369	0.238	1.11	0.57	1.11	0.57
rs12653946	5	1895829	32	4	6	2	exm442293	rs28364997	-492.701	NA	SLC6A3	NS	7.04	0.047	6.62691e-05	NA	NA	0	NA	NA	0	>999.999	0.05	0	>999.999	0.49	0	3.692	0.25	0.0002973	0.854	0.3	0.854	0.3	0.601	0.257	0.601	0.257	0.886	0.448	0.886	0.448
							exm442626	rs2232376	-14.938	0.076	IRX4	NS	1.064	0.12	0.136315	1.095	0.14	0.2202	0.991	0.98	0.06203	1.347	0.32	0.007207	1.026	0.76	0.1325	1.028	0.71	0.2045	1.055	0.167	0.948	0.716	1.201	0.0416	1.206	0.543	1.044	0.295	0.932	0.654
							exm442408	rs144081179	-431.897	0.003	LPCAT1	NS	2.484	0.14	0.000265076	NA	NA	0	<0.001	0.66	0.001241	NA	NA	0	>999.999	0.0018	0	<0.001	0.2	0.0008918	0.907	0.446	0.907	0.446	0.969	0.921	0.969	0.921	0.914	0.51	0.914	0.51
							exm442557	rs192286856	-81.306	0.002	NDUFS6	NS	0.641	0.38	0.00072896	1.642	0.48	0.000932	NA	NA	0	NA	NA	0	0.239	0.057	0.002688	NA	NA	0	0.641	0.385	0.641	0.385	0.988	0.991	0.988	0.991	0.499	0.232	0.499	0.232
rs2121875	5	44365545	13	2	2	1	exm453849	rs75089600	447.723	NA	MRPS30	NS	2.538	0.044	0.000463883	2.129	0.14	0.001631	NA	NA	0	NA	NA	0	318.34	0.24	0	NA	NA	0	1.213	0.1	1.213	0.1	1.193	0.528	1.193	0.528	1.218	0.113	1.218	0.113
							exm453776	rs147715509	-60.441	NA	FGF10	NS	0.552	0.45	0.000463883	<0.001	0.47	0.000233	NA	NA	0	NA	NA	0	NA	NA	0	0.639	0.58	0.001784	1.073	0.812	1.073	0.812	1.101	0.896	1.101	0.896	1	0.999	1	0.999
rs6869841	5	172939426	26	7	1	1	exm504141	NA	-403.746	NA	C5orf41	NS	>999.999	0.0031	0	>999.999	0.093	0	NA	NA	0	NA	NA	0	NA	NA	0	>999.999	0.016	0	1.046	0.326	1.287	0.565	1.09	0.429	<0.001	0.344	1.051	0.3	1.551	0.316
							exm504249	rs148037199	-194.544	NA	STC2	NS	0.412	0.032	0.0019218	0.47	0.093	0.005592	NA	NA	0	NA	NA	0	0.323	0.29	0.001536	<0.001	0.43	0.0002973	0.739	0.0465	0.739	0.0465	0.939	0.855	0.939	0.855	0.721	0.0448	0.721	0.0448
							exm504359	rs141459322	378.4	NA	CPEB4	NS	1.511	0.052	0.00318091	1.477	0.08	0.01072	NA	NA	0	NA	NA	0	2.015	0.34	0.000768	NA	NA	0	1.587	0.0209	1.587	0.0209	1.824	0.141	1.824	0.141	1.637	0.0198	1.637	0.0198
							exm504238	NA	-279.052	NA	NKX2-5	NS	0.58	0.2	0.00125911	0.628	0.69	0.000699	NA	NA	0	NA	NA	0	0.641	0.44	0.003072	0.49	0.36	0.002378	0.947	0.684	0.947	0.684	0.87	0.689	0.87	0.689	0.967	0.811	0.967	0.811
							exm504162	rs5745100	-367.836	NA	BNIP1	NS	0.687	0.25	0.00231942	0.686	0.25	0.008155	NA	NA	0	NA	NA	0	NA	NA	0	NA	NA	0	0.762	0.265	0.762	0.265	0.573	0.438	0.573	0.438	0.77	0.314	0.77	0.314
							exm504409	rs56138314	487.283	0	C5orf47	NS	1.095	0.3	0.0229954	0.838	0.24	0.03658	1.832	0.24	0.009926	1.465	0.62	0.000994	1.256	0.19	0.02458	1.253	0.14	0.03389	1.087	0.344	0.6	0.534	0.964	0.868	<0.001	0.532	1.108	0.27	0.708	0.677
							exm2242224	rs258857	94.723	0.018	BOD1	SP	1.009	0.76	0.467714	1.002	0.97	0.4594	0.968	0.82	0.5571	0.935	0.26	0.6966	1.094	0.14	0.3232	1.026	0.69	0.2949	1.009	0.76	NA	NA	0.866	0.0391	NA	NA	1.027	0.391	NA	NA
rs130067	6	31118511	354	35	80	6	exm531492	rs3132453	485.533	NA	PRRC2A	NS	1.272	0.0066	0.021546	1.242	0.25	0.0175	1.145	0.81	0.01861	NA	NA	0	1.26	0.2	0.02343	1.314	0.028	0.05172	0.983	0.482	0.964	0.463	1.107	0.0769	1.01	0.935	0.959	0.11	0.956	0.401
							exm529235	rs11969476	-199.37	NA	DPCR1	NS	1.297	0.0092	0.0169671	1.258	0.039	0.05079	0.535	0.62	0.003722	<0.001	0.46	0.0002485	1.829	0.036	0.007302	1.077	0.87	0.004459	1.059	0.199	1.043	0.656	0.951	0.65	1.047	0.838	1.082	0.0948	1.035	0.734
							exm530981	rs3130062	407.401	NA	NFKBIL1	NS	1.224	0.016	0.0243207	1.11	0.58	0.01911	0.801	0.69	0.01861	>999.999	0.24	0	1.242	0.2	0.02727	1.28	0.034	0.05916	2.643	0.172	2.643	0.172	<0.001	0.671	<0.001	0.671	3.134	0.104	3.134	0.104
							exm531639	rs140624556	495.775	NA	BAG6	NS	1.688	0.024	0.00265076	1.807	0.022	0.007456	NA	NA	0	NA	NA	0	2.645	0.15	0.001152	<0.001	0.12	0.001486	0.977	0.406	1.329	0.163	0.898	0.103	1.096	0.86	0.986	0.632	1.333	0.181
							exm531208	NA	465.608	NA	AIF1	SP	0.133	0.026	0.00059658	NA	NA	0	NA	NA	0	NA	NA	0	<0.001	0.01	0.003072	1.855	0.66	0.0002973	0.46	0.0976	0.46	0.0976	0.642	0.666	0.642	0.666	0.445	0.107	0.445	0.107
							exm529088	rs144628280	-228.516	NA	VARS2	NS	>999.999	0.028	0	NA	NA	0	NA	NA	0	NA	NA	0	NA	NA	0	>999.999	0.035	0	0.952	0.0965	0.998	0.982	0.969	0.659	1.081	0.747	0.937	0.0356	0.979	0.845
							exm528719	rs139987312	-410.236	NA	FLOT1	NS	<0.001	0.033	0.000530152	<0.001	0.05	0.001631	NA	NA	0	NA	NA	0	<0.001	0.32	0.000384	NA	NA	0	0.537	0.278	0.537	0.278	<0.001	0.352	<0.001	0.352	0.644	0.448	0.644	0.448
							exm529679	NA	-38.757	NA	C6orf15	NS	>999.999	0.036	0	NA	NA	0	NA	NA	0	NA	NA	0	>999.999	0.023	0	NA	NA	0	1.04	0.0811	1.299	0.231	1.09	0.109	1.703	0.257	1.03	0.215	1.275	0.297
							exm529869	rs9263726	-12.012	NA	PSORS1C1	NS	0.906	0.036	0.100795	0.813	0.005	0.1701	0.634	0.11	0.08065	0.578	0.12	0.008698	1.116	0.25	0.09754	0.954	0.6	0.1299	0.953	0.185	0.923	0.438	1.042	0.63	1.181	0.496	0.943	0.128	0.85	0.154
							exm530458	rs41548215	204.394	NA	HLA-B	NS	1.995	0.045	0.000995091	3.337	0.084	0.0006993	<0.001	0.48	0.001241	NA	NA	0	2.925	0.062	0.001537	1.138	0.84	0.002082	0.996	0.718	1.718	0.108	1.006	0.825	3.083	0.0364	0.995	0.663	1.556	0.226
							exm530706	rs41560824	260.532	NA	MICA	NS	0.846	0.047	0.0266649	0.786	0.16	0.02822	1.788	0.37	0.007444	0.685	0.76	0.000497	0.724	0.015	0.05508	1.058	0.71	0.03867	0.998	0.873	1.268	0.185	1.018	0.501	1.452	0.307	0.996	0.728	1.176	0.396
							exm528886	rs187982887	-253.363	NA	DDR1	NS	0.618	0.052	0.00483764	NA	NA	0	0.872	0.72	0.03598	0.466	0.029	0.01069	NA	NA	0	1.633	0.74	0.0002973	1.027	0.47	0.814	0.0593	1.012	0.898	0.632	0.132	1.039	0.336	0.815	0.0765
							exm529161	rs2286656	-218.94	NA	SFTA2	SP	0.939	0.053	0.272601	0.838	0.026	0.1387	0.826	0.21	0.3015	1.024	0.67	0.4555	0.95	0.42	0.3276	0.897	0.18	0.1751	0.939	0.0531	NA	NA	0.917	0.266	NA	NA	0.927	0.0268	NA	NA
							exm529999	rs151116980	0.333	NA	CCHCR1	NS	2.333	0.055	0.000596421	2.321	0.056	0.002097	NA	NA	0	NA	NA	0	NA	NA	0	NA	NA	0	0.999	0.973	0.927	0.397	1.078	0.0782	1.038	0.863	0.994	0.734	0.905	0.297
							exm529802	rs144847588	-33.225	NA	CDSN	NS	0.448	0.057	0.001723	0.558	0.25	0.003728	<0.001	0.66	0.001241	<0.001	0.56	0.0002485	0.155	0.046	0.002688	2.138	0.58	0.0002973	1.012	0.53	1.032	0.811	0.919	0.0665	1.257	0.406	1.022	0.29	0.997	0.983
							exm530081	rs2073721	11.105	NA	TCF19	NS	1.062	0.061	0.252618	1.062	0.4	0.1559	1.171	0.3	0.3598	1.044	0.44	0.3787	1.149	0.046	0.2075	0.974	0.7	0.2345	1.026	0.813	1.026	0.813	0.781	0.41	0.781	0.41	1.037	0.752	1.037	0.752
							exm530865	rs78957773	378.438	NA	MCCD1	NS	0.854	0.076	0.0247184	0.851	0.33	0.02866	1.274	0.73	0.007444	1.401	0.82	0.0002485	0.713	0.019	0.04877	1.039	0.81	0.03448	0.978	0.541	1.477	0.524	0.991	0.92	2.302	0.442	0.973	0.479	1.503	0.524
							exm529511	rs78457009	-124.876	NA	PBMUCL1	NS	1.157	0.077	0.0259112	1.543	0.31	0.003029	1.03	0.95	0.01985	1.051	0.65	0.06536	1.481	0.017	0.0265	0.842	0.61	0.008918	0.997	0.656	0.982	0.667	1.005	0.757	0.906	0.384	0.998	0.757	0.998	0.962
							exm531082	rs3093554	430.896	NA	LTB	SP	0.665	0.089	0.00457256	0.656	0.09	0.01514	<0.001	0.46	0.001241	NA	NA	0	0.77	0.78	0.001152	NA	NA	0	0.979	0.835	0.907	0.513	1.188	0.455	1.055	0.878	0.958	0.696	0.882	0.436
							exm528557	rs61744913	-442.681	NA	MDC1	NS	0.802	0.12	0.0102717	0.871	0.59	0.01165	1.536	0.78	0.001241	NA	NA	0	0.567	0.012	0.02189	1.118	0.65	0.01397	0.992	0.466	0.982	0.567	0.95	0.0816	0.779	0.0317	0.998	0.859	1.011	0.732
							exm528754	rs3094124	-406.706	NA	IER3	NS	1.127	0.12	0.0316766	1.415	0.052	0.01887	1.665	0.24	0.02109	2.8	0.44	0.0002485	1.035	0.81	0.04147	1.046	0.68	0.08056	1.061	0.275	1.81	0.436	1.15	0.268	3.775	0.222	1.051	0.385	1.611	0.56
							exm530805	NA	355.532	NA	MICB	NS	>999.999	0.12	0	NA	NA	0	NA	NA	0	NA	NA	0	NA	NA	0	>999.999	0.13	0	1.01	0.778	1.272	0.328	1.082	0.346	1.188	0.776	0.999	0.973	1.252	0.389
							exm530179	rs1130838	118.613	NA	HLA-C	NS	1.052	0.13	0.21242	1.138	0.05	0.185	0.939	0.71	0.2184	0.995	0.95	0.1499	1.047	0.5	0.2224	1.045	0.49	0.3132	0.999	0.932	<0.001	0.189	1.005	0.851	<0.001	0.649	1	0.974	<0.001	0.229
							exm528220	rs149882569	-485.125	NA	DHX16	NS	3.195	0.14	0.000132556	NA	NA	0	NA	NA	0	NA	NA	0	3.563	0.11	0.000768	NA	NA	0	0.99	0.912	1.033	0.773	1.126	0.548	0.972	0.914	0.985	0.873	1.048	0.686
							exm528285	NA	-465.931	NA	KIAA1949	NS	<0.001	0.17	0.000265076	NA	NA	0	NA	NA	0	NA	NA	0	NA	NA	0	<0.001	0.15	0.001189	1.022	0.717	1.024	0.811	1.068	0.641	1.042	0.865	1.022	0.725	1.034	0.745
							exm529832	rs2233952	-12.62	NA	PSORS1C2	NS	1.075	0.18	0.0643472	1.279	0.11	0.02749	0.68	0.29	0.05211	0.928	0.52	0.06362	1.219	0.049	0.07988	1.047	0.63	0.1032	1.034	0.612	1.162	0.337	1.02	0.897	1.212	0.569	1.035	0.622	1.12	0.497
							exm528976	rs3218820	-238.355	NA	GTF2H4	NS	0.809	0.26	0.00609675	0.624	0.31	0.00466	<0.001	0.11	0.003722	<0.001	0.24	0.000497	0.981	0.96	0.005376	0.886	0.62	0.01576	0.809	0.257	0.809	0.257	0.824	0.677	0.824	0.677	0.799	0.258	0.799	0.258
							exm529412	rs141846588	-163.674	NA	MUC21	NS	1.685	0.26	0.000662778	1.649	0.28	0.00233	NA	NA	0	NA	NA	0	NA	NA	0	NA	NA	0	1.039	0.88	1.039	0.88	0.802	0.757	0.802	0.757	1.078	0.778	1.078	0.778
							exm531166	rs149339643	439.185	NA	NCR3	NS	0.531	0.28	0.00072896	<0.001	0.33	0.000466	NA	NA	0	NA	NA	0	0.594	0.57	0.001152	0.63	0.57	0.001784	0.964	0.881	0.964	0.881	1.879	0.146	1.879	0.146	0.891	0.661	0.891	0.661
							exm530951	rs146579549	394.688	NA	ATP6V1G2	NS	2.478	0.32	0.000132538	1.054	0.97	0.000466	NA	NA	0	NA	NA	0	>999.999	0.18	0	NA	NA	0	2.478	0.316	2.478	0.316	<0.001	0.737	<0.001	0.737	2.985	0.221	2.985	0.221
							exm531009	rs2229094	422.045	NA	LTA	NS	0.972	0.37	0.250762	0.985	0.8	0.2763	0.827	0.22	0.3251	1.133	0.07	0.1844	0.87	0.045	0.2462	0.959	0.52	0.2833	0.999	0.974		NA	1.014	0.842		NA	1.007	0.823		NA
							exm531059	rs11574936	426.682	NA	TNF	NS	0.553	0.6	0.000198807	<0.001	0.44	0.000233	NA	NA	0	NA	NA	0	NA	NA	0	0.903	0.93	0.0005945	0.553	0.603	0.553	0.603	<0.001	0.672	<0.001	0.672	0.651	0.708	0.651	0.708
							exm528347	rs61572689	-462.002	NA	NRM	NS	1.042	0.66	0.019947	2.241	0.17	0.001398	0.991	0.98	0.02109	1.102	0.54	0.02783	1.008	0.95	0.05991	0.637	0.47	0.002973	1.05	0.593	1.232	0.62	1.117	0.589	1.351	0.772	1.048	0.625	1.288	0.559
							exm531132	rs184203129	437.784	NA	LST1	SP	1.423	0.67	0.000199097	2.032	0.47	0.0004664	NA	NA	0	NA	NA	0	0.814	0.88	0.0003846	NA	NA	0	1.423	0.67	1.423	0.67	4.81	0.141	4.81	0.141	1.234	0.82	1.234	0.82
							exm528097	NA	-500.851	NA	C6orf136	NS	<0.001	0.17	0.000132538	<0.001	0.51	0.000233	NA	NA	0	NA	NA	0	<0.001	0.19	0.000384	NA	NA	0	1.012	0.938	1.012	0.938	0.999	0.997	0.999	0.997	0.968	0.844	0.968	0.844
rs3096702	6	32192331	396	38	85	12	exm533062	rs115884658	-327.793	NA	EHMT2	NS	1.757	0.0011	0.0047051	1.325	0.42	0.004893	1.089	0.92	0.004963	NA	NA	0	1.287	0.72	0.001536	1.999	0.0013	0.01249	1.533	0.00465	1.533	0.00465	0.804	0.637	0.804	0.637	1.625	0.00176	1.625	0.00176
							exm533718	NA	-228.487	NA	C4A	NS	4.917	0.0031	0.000265146	4.866	0.0033	0.000932	NA	NA	0	NA	NA	0	NA	NA	0	NA	NA	0	4.917	0.0031	4.917	0.0031	13.905	9.29e-06	13.905	9.29e-06	4.112	0.0154	4.112	0.0154
							exm533505	rs3911893	-256.764	NA	SKIV2L	NS	0.857	0.0088	0.061829	0.921	0.41	0.07922	1.019	0.96	0.03226	0.909	0.46	0.05144	0.795	0.061	0.06528	0.733	0.026	0.05648	0.909	0.0522	1.004	0.968	0.901	0.387	1.238	0.369	0.9	0.0431	0.984	0.888
							exm534674	rs2071289	-57.195	NA	EGFL8	NS	1.435	0.011	0.00781975	1.423	0.2	0.006757	2.388	0.11	0.01117	1.517	0.021	0.01839	0.327	0.3	0.001536	<0.001	0.3	0.0005945	0.679	0.147	0.679	0.147	0.608	0.488	0.608	0.488	0.727	0.252	0.727	0.252
							exm535000	rs61729677	-22.322	NA	NOTCH4	NS	4.651	0.012	0.00019886	NA	NA	0	NA	NA	0	NA	NA	0	8.273	0.023	0.0003846	2.847	0.23	0.0005945	1.001	0.925	0.907	0.218	1.006	0.874	0.82	0.335	1.006	0.704	0.933	0.403
							exm533191	rs36221133	-279.808	NA	C2	NS	0.774	0.015	0.0179589	0.637	0.14	0.01025	2.441	0.21	0.004963	1.401	0.82	0.0002485	0.641	0.0029	0.04839	0.998	0.99	0.02854	0.832	0.00943	0.883	0.345	0.936	0.69	1.082	0.795	0.83	0.0129	0.897	0.437
							exm532255	rs145957272	-461.033	NA	C6orf26	NS	>999.999	0.027	0	NA	NA	0	>999.999	0.22	0	NA	NA	0	>999.999	0.091	0	NA	NA	0	1.088	0.256	1.062	0.499	1.146	0.414	1.193	0.349	1.058	0.475	1.033	0.736
							exm532488	rs147295435	-441.799	NA	VARS	NS	7.65	0.032	6.62691e-05	1.969	0.63	0.000233	NA	NA	0	NA	NA	0	NA	NA	0	>999.999	0.019	0	0.989	0.807	0.996	0.97	1.083	0.45	1.077	0.784	0.98	0.673	0.968	0.795
							exm2121838	rs138178120	-42.245	NA	AGER	NS	0.44	0.033	0.00159046	NA	NA	0	NA	NA	0	NA	NA	0	0.462	0.065	0.007296	0.353	0.32	0.001486	1.002	0.98	1.002	0.98	1.092	0.671	1.092	0.671	1.006	0.949	1.006	0.949
							exm534302	rs185207099	-142.27	NA	TNXB	NS	0.166	0.053	0.000662691	<0.001	0.16	0.000932	<0.001	0.76	0.001241	NA	NA	0	<0.001	0.15	0.000768	0.63	0.69	0.0008918	0.985	0.0956	1.03	0.566	1.017	0.45	0.826	0.162	0.981	0.0498	1.062	0.256
							exm535318	rs146912123	125.186	NA	C6orf10	SP	2.846	0.061	0.000331345	4.432	0.019	0.000699	NA	NA	0	NA	NA	0	0.765	0.85	0.000384	<0.001	0.49	0.0002973	0.975	0.24	0.93	0.655	0.979	0.686	0.901	0.791	0.968	0.157	0.914	0.604
							exm532587	rs139969031	-414.136	NA	HSPA1L	NS	6.302	0.065	6.62691e-05	NA	NA	0	NA	NA	0	NA	NA	0	>999.999	0.046	0	2.248	0.56	0.0002973	1.242	0.16	1.242	0.16	1.435	0.305	1.435	0.305	1.11	0.538	1.11	0.538
							exm532815	NA	-358.656	NA	SLC44A4	NS	>999.999	0.065	0	NA	NA	0	NA	NA	0	NA	NA	0	>999.999	0.18	0	>999.999	0.18	0	0.992	0.786	0.965	0.526	0.904	0.151	0.858	0.312	1.015	0.612	0.997	0.957
							exm532379	rs139468471	-448.372	NA	C6orf27	NS	<0.001	0.082	0.000397614	<0.001	0.08	0.001398	NA	NA	0	NA	NA	0	NA	NA	0	NA	NA	0	0.993	0.874	1.023	0.725	1.078	0.472	0.863	0.385	0.979	0.652	1.05	0.477
							exm536044	rs12722039	412.953	NA	HLA-DQA1	NS	1.105	0.09	0.0546419	1.124	0.24	0.0695	0.623	0.051	0.1141	1.083	0.48	0.05973	1.135	0.42	0.03303	1.417	0.021	0.0321	1.001	0.922	NA	NA	1.02	0.584	NA	NA	1.001	0.931	NA	NA
							exm532135	NA	-484.026	NA	MSH5	NS	<0.001	0.095	0.000331345	<0.001	0.097	0.001165	NA	NA	0	NA	NA	0	NA	NA	0	NA	NA	0	0.965	0.295	1.042	0.696	0.884	0.151	1.201	0.428	0.973	0.438	1.043	0.702
							exm532087	NA	-496.94	NA	DDAH2	NS	2.355	0.13	0.000331345	>999.999	0.016	0	<0.001	0.79	0.001241	NA	NA	0	0.846	0.84	0.001152	4.029	0.22	0.0002973	1.958	0.185	1.958	0.185	1.846	0.565	1.846	0.565	2.062	0.164	2.062	0.164
							exm2121470	rs117314762	-278.025	NA	CFB	NS	0.753	0.13	0.00702452	NA	NA	0	NA	NA	0	0.786	0.21	0.02634	NA	NA	0	NA	NA	0	0.99	0.788	0.94	0.531	1.121	0.208	1.06	0.796	0.984	0.693	0.916	0.403
							exm533582	NA	-254.144	NA	DOM3Z	NS	<0.001	0.13	0.000132538	NA	NA	0	NA	NA	0	NA	NA	0	<0.001	0.12	0.000768	NA	NA	0	0.938	0.174	0.907	0.344	1.073	0.52	0.742	0.297	0.915	0.0774	0.936	0.542
							exm534571	rs117160266	-94.856	NA	FKBPL	NS	0.754	0.14	0.00589795	0.792	0.52	0.006291	0.197	0.11	0.009926	0.713	0.39	0.005716	0.813	0.58	0.006144	0.878	0.78	0.004459	0.972	0.554	0.881	0.327	1.122	0.299	1.071	0.811	0.966	0.49	0.876	0.336
							exm536297	rs1130399	437.424	NA	HLA-DQB1	NS	1.046	0.14	0.293903	1.01	0.88	0.2181	0.911	0.56	0.2692	1.075	0.19	0.4334	1.078	0.22	0.346	1.029	0.7	0.1894	1.003	0.792	NA	NA	1.007	0.775	NA	NA	1.003	0.787	NA	NA
							exm2121508	rs150281579	-269.861	NA	RDBP	NS	1.714	0.15	0.000861498	1.586	0.37	0.001864	NA	NA	0	NA	NA	0	1.419	0.54	0.00192	>999.999	0.17	0	1.714	0.154	1.714	0.154	0.951	0.962	0.951	0.962	1.674	0.196	1.674	0.196
							exm534716	NA	-53.244	NA	AGPAT1	NS	0.256	0.17	0.000463883	0.309	0.25	0.001398	NA	NA	0	NA	NA	0	NA	NA	0	<0.001	0.46	0.0002973	0.834	0.533	0.834	0.533	0.477	0.449	0.477	0.449	0.827	0.541	0.827	0.541
							exm534467	rs148987710	-107.846	NA	ATF6B	NS	>999.999	0.18	0	>999.999	0.16	0	NA	NA	0	NA	NA	0	NA	NA	0	NA	NA	0	1.031	0.82	1.031	0.82	0.992	0.981	0.992	0.981	1.036	0.806	1.036	0.806
							exm535402	rs116715584	171.761	NA	BTNL2	NS	0.648	0.18	0.00238569	0.7	0.28	0.007922	NA	NA	0	NA	NA	0	<0.001	0.14	0.000768	NA	NA	0	0.999	0.908	0.997	0.919	0.98	0.141	0.997	0.956	1.001	0.874	1.004	0.87
							exm535823	rs35445101	354.548	NA	HLA-DRB1	NS	1.04	0.19	0.29486	1.046	0.5	0.1888	0.979	0.89	0.294	1.081	0.16	0.374	1.021	0.73	0.3283	1.023	0.71	0.3103	1.009	0.674	1.075	0.685	0.988	0.814	1.323	0.486	1.008	0.738	1.082	0.677
							exm532108	rs144365219	-493.617	NA	CLIC1	NS	>999.999	0.22	0	NA	NA	0	NA	NA	0	NA	NA	0	NA	NA	0	>999.999	0.2	0	1.096	0.881	1.096	0.881	1.748	0.605	1.748	0.605	0.832	0.797	0.832	0.797
							exm535503	rs58547911	219.315	NA	HLA-DRA	NS	0.968	0.24	0.382092	1.066	0.24	0.4031	0.902	0.47	0.3313	0.917	0.13	0.3749	1.038	0.54	0.3714	0.841	0.0051	0.3844	1.222	0.686	1.222	0.686	<0.001	0.404	<0.001	0.404	1.466	0.438	1.466	0.438
							exm2121830	rs151021379	-44.64	NA	RNF5	NS	0.854	0.28	0.00974284	0.595	0.65	0.000699	0.818	0.53	0.05707	0.666	0.13	0.01367	0.962	0.87	0.01499	3.246	0.062	0.001189	0.854	0.28	0.854	0.28	1.057	0.863	1.057	0.863	0.861	0.336	0.861	0.336
							exm534616	rs143092169	-68.837	NA	PPT2	NS	1.945	0.29	0.000331345	2.018	0.26	0.001165	NA	NA	0	NA	NA	0	NA	NA	0	NA	NA	0	1.017	0.623	1.247	0.626	1.101	0.233	1.416	0.737	1.001	0.988	1.286	0.594
							exm532037	rs141914091	-500.823	NA	C6orf25	NS	4.265	0.064	0.000132538	3.077	0.2	0.000466	NA	NA	0	NA	NA	0	>999.999	0.12	0	NA	NA	0	1.017	0.927	1.017	0.927	1.355	0.416	1.355	0.416	0.972	0.884	0.972	0.884
							exm2121341	NA	-364.317	NA	NEU1	NS	<0.001	0.4	6.62691e-05	NA	NA	0	NA	NA	0	<0.001	0.37	0.0002485	NA	NA	0	NA	NA	0	1.014	0.888	0.864	0.787	1.094	0.717	<0.001	0.425	1.02	0.855	0.841	0.768
							exm534866	rs149461273	-36.414	NA	PBX2	NS	<0.001	0.42	6.62778e-05	NA	NA	0	NA	NA	0	NA	NA	0	NA	NA	0	<0.001	0.45	0.0002973	1.275	0.791	1.275	0.791	5.245	0.11	5.245	0.11	0.713	0.769	0.713	0.769
							exm533627	rs34548063	-252.508	NA	STK19	ST	1.064	0.66	0.00954274	1.035	0.81	0.03192	NA	NA	0	NA	NA	0	1.913	0.25	0.00192	<0.001	0.35	0.0005945	1.069	0.635	1.069	0.635	1.093	0.799	1.093	0.799	1.031	0.837	1.031	0.837
							exm533093	rs145694508	-323.924	NA	ZBTB12	NS	1.091	0.74	0.00245195	1.255	0.42	0.007456	NA	NA	0	NA	NA	0	0.327	0.31	0.001152	0.815	0.88	0.0005945	1.091	0.743	1.091	0.743	1.751	0.29	1.751	0.29	0.963	0.898	0.963	0.898
							exm532734	rs3130679	-384.791	NA	C6orf48	SP	1.02	0.79	0.0370444	0.953	0.79	0.0233	1.407	0.37	0.02605	>999.999	0.049	0	1.021	0.9	0.03072	0.994	0.95	0.1064	1.023	0.738	1.04	0.829	1.371	0.0307	1.403	0.387	0.973	0.714	0.987	0.947
							exm534582	rs143664192	-74.875	NA	PRRT1	NS	1.176	0.82	0.000331521	0.776	0.76	0.001166	NA	NA	0	NA	NA	0	>999.999	0.17	0	NA	NA	0	1.174	0.827	1.174	0.827	<0.001	0.601	<0.001	0.601	1.427	0.627	1.427	0.627
							exm534899	rs141537386	-32.657	NA	GPSM3	NS	1.048	0.96	0.00019886	<0.001	0.46	0.000233	NA	NA	0	NA	NA	0	1.207	0.89	0.000384	1.932	0.64	0.0002974	1.048	0.959	1.048	0.959	4.102	0.193	4.102	0.193	0.673	0.732	0.673	0.732
rs1983891	6	41536427	138	19	12	2	exm545724	rs9471577	-232.432	0.002	NCR2	NS	0.922	0.025	0.201259	0.848	0.012	0.2162	0.73	0.049	0.304	0.977	0.69	0.329	0.942	0.53	0.106	0.99	0.93	0.07848	1	0.97	1.056	0.313	0.996	0.903	0.92	0.563	0.998	0.903	1.08	0.175
							exm545704	rs2234237	-285.961	0	TREM1	NS	0.926	0.036	0.184981	0.927	0.31	0.1421	0.939	0.68	0.3412	0.91	0.12	0.2944	0.978	0.78	0.1548	0.902	0.31	0.09483	0.924	0.0215	1.216	0.19	1.001	0.988	0.639	0.369	0.907	0.00753	1.235	0.177
							exm545524	rs142232675	-407.294	NA	TREM2	NS	<0.001	0.043	0.000530152	<0.001	0.3	0.000466	<0.001	0.41	0.002481	NA	NA	0	<0.001	0.25	0.000768	<0.001	0.33	0.0005945	1.02	0.755	0.902	0.406	1.271	0.0818	1.077	0.78	0.975	0.71	0.845	0.208
							exm545477	rs35929443	-418.427	0.002	TREML1	SP	0.614	0.057	0.00377734	0.406	0.4	0.001165	>999.999	0.031	0	0.403	0.038	0.007455	0.628	0.33	0.004992	1.062	0.91	0.002675	0.894	0.178	0.882	0.417	0.95	0.803	0.377	0.081	0.914	0.306	0.955	0.774
							exm545415	rs144679838	-498.595	0.002	C6orf130	ST	2.257	0.058	0.000596421	4.745	0.16	0.000233	NA	NA	0	NA	NA	0	1.003	1	0.001536	3.328	0.043	0.001189	1.239	0.556	1.239	0.556	<0.001	0.216	<0.001	0.216	1.482	0.279	1.482	0.279
							exm546175	NA	206.817	NA	FRS3	NS	4.427	0.062	0.000132538	>999.999	0.14	0	NA	NA	0	7.785	0.042	0.0002485	NA	NA	0	<0.001	0.47	0.0002973	1.009	0.883	0.989	0.932	0.964	0.814	0.845	0.624	1.018	0.784	1.008	0.953
							exm546256	rs151216099	229.998	NA	USP49	NS	0.522	0.067	0.00238632	0.495	0.057	0.008159	NA	NA	0	NA	NA	0	<0.001	0.28	0.000384	>999.999	0.18	0	0.958	0.619	0.871	0.305	1.071	0.737	0.761	0.455	0.939	0.489	0.885	0.392
							exm546017	rs146485859	168.308	NA	PGC	NS	0.279	0.081	0.00072896	NA	NA	0	>999.999	0.071	0	NA	NA	0	<0.001	0.024	0.00192	0.331	0.28	0.001784	0.862	0.275	0.862	0.275	0.573	0.18	0.573	0.18	0.905	0.485	0.905	0.485
							exm545835	rs142575732	18.813	NA	FOXP4	NS	<0.001	0.11	0.000331345	<0.001	0.37	0.000466	NA	NA	0	NA	NA	0	NA	NA	0	<0.001	0.21	0.0008918	1.061	0.694	1.061	0.694	1.506	0.197	1.506	0.197	0.994	0.969	0.994	0.969
							exm546460	rs33966734	367.371	0	CCND3	NS	0.77	0.11	0.00735586	1.024	0.96	0.003262	1.538	0.6	0.004963	NA	NA	0	0.655	0.1	0.01536	0.806	0.4	0.01576	0.844	0.144	0.844	0.144	1.179	0.51	1.179	0.51	0.789	0.0607	0.789	0.0607
							exm545619	rs112680060	-340.258	0.006	TREML4	NS	1.299	0.15	0.00483764	2.486	0.22	0.000699	1.472	0.33	0.02481	>999.999	0.23	0	1.596	0.096	0.008833	0.737	0.41	0.008026	1.016	0.361	1.098	0.396	0.978	0.595	1.106	0.702	1.021	0.259	1.105	0.392
							exm545565	rs115024549	-373.861	NA	TREML2	NS	0.722	0.18	0.00404295	0.718	0.19	0.01329	NA	NA	0	NA	NA	0	0.446	0.34	0.001536	>999.999	0.15	0	1.033	0.223	0.841	0.259	0.96	0.525	0.562	0.205	1.047	0.104	0.893	0.48
							exm545951	rs61756225	116.139	NA	TFEB	NS	>999.999	0.18	0	NA	NA	0	NA	NA	0	NA	NA	0	NA	NA	0	>999.999	0.18	0	1.101	0.604	1.101	0.604	1.11	0.824	1.11	0.824	1.163	0.435	1.163	0.435
							exm2125673	rs147741170	216.279	0.001	PRICKLE4	NS	1.205	0.2	0.00862183	NA	NA	0	1.871	0.38	0.00625	1.163	0.32	0.03082	>999.999	0.27	0	1.746	0.7	0.0002974	1.079	0.292	1.124	0.212	1.106	0.57	1.006	0.982	1.085	0.286	1.16	0.129
							exm546402	rs142676892	353.126	NA	BYSL	NS	1.747	0.2	0.000662691	0.937	0.96	0.000466	<0.001	0.44	0.001241	NA	NA	0	2.223	0.24	0.001152	1.893	0.36	0.001189	1.02	0.619	1.114	0.488	0.927	0.447	1.492	0.227	1.04	0.343	1.123	0.481
							exm545909	rs140878125	80.975	NA	MDFI	NS	0.451	0.21	0.000795229	0.603	0.44	0.00233	NA	NA	0	NA	NA	0	<0.001	0.23	0.000768	NA	NA	0	1.038	0.822	1.038	0.822	1.581	0.191	1.581	0.191	0.974	0.883	0.974	0.883
							exm546533	NA	488.783	NA	TAF8	NS	<0.001	0.3	0.000132538	NA	NA	0	NA	NA	0	NA	NA	0	NA	NA	0	<0.001	0.31	0.0005945	<0.001	0.173	<0.001	0.173	<0.001	0.618	<0.001	0.618	<0.001	0.212	<0.001	0.212
							exm2275887	rs140526856	348.117	NA	MED20	NS	0.723	0.59	0.000596421	1.125	0.93	0.000466	>999.999	0.25	0	NA	NA	0	<0.001	0.27	0.000384	0.599	0.53	0.001784	0.723	0.593	0.723	0.593	1.739	0.598	1.739	0.598	0.413	0.248	0.413	0.248
							exm545445	rs143219175	-478.477	NA	NFYA	NS	0.71	0.61	0.000530293	0.491	0.36	0.001864	NA	NA	0	NA	NA	0	>999.999	0.19	0	NA	NA	0	1.001	0.996	1.001	0.996	<0.001	0.315	<0.001	0.315	1.059	0.893	1.059	0.893
rs2273669	6	109285189	99	8	19	2	exm570355	rs145013219	9.401	NA	ARMC2	NS	9.94	0.012	6.62691e-05	8.511	0.023	0.000233	NA	NA	0	NA	NA	0	NA	NA	0	>999.999	0.1	0	0.982	0.656	1.097	0.597	1.022	0.826	1.613	0.176	0.977	0.602	1.015	0.937
							exm570868	rs140293205	487.633	NA	MICAL1	NS	3.321	0.025	0.000331345	2.794	0.069	0.001165	NA	NA	0	NA	NA	0	>999.999	0.19	0	NA	NA	0	0.994	0.809	1.078	0.45	0.978	0.688	1.128	0.615	0.995	0.824	1.062	0.569
							exm570475	rs138417096	195.052	NA	CEP57L1	NS	4.663	0.039	0.000132538	3.411	0.13	0.000466	NA	NA	0	NA	NA	0	>999.999	0.1	0	NA	NA	0	1.139	0.131	1.217	0.0933	0.841	0.467	0.831	0.576	1.216	0.0287	1.327	0.0191
							exm570100	rs147480760	-616.979	NA	LACE1	NS	2.798	0.065	0.000331345	<0.001	0.23	0.000699	NA	NA	0	NA	NA	0	>999.999	0.1	0	4.901	0.036	0.0005945	1.075	0.316	1.369	0.0294	1.238	0.188	1.69	0.0739	1.031	0.697	1.35	0.0505
							exm570565	rs145357332	415.658	NA	CD164	NS	<0.001	0.08	0.000331345	<0.001	0.31	0.000466	NA	NA	0	NA	NA	0	<0.001	0.16	0.001152	NA	NA	0	0.729	0.193	0.729	0.193	1.105	0.848	1.105	0.848	0.647	0.105	0.647	0.105
							exm570668	rs145532915	479.052	NA	SMPD2	NS	2.785	0.16	0.000199045	2.92	0.14	0.000699	NA	NA	0	NA	NA	0	NA	NA	0	NA	NA	0	1.014	0.618	0.896	0.495	1.002	0.972	0.54	0.218	1.018	0.555	0.909	0.577
							exm570406	rs140062020	36.615	NA	SESN1	NS	0.251	0.17	0.000397614	0.349	0.32	0.001165	NA	NA	0	NA	NA	0	<0.001	0.28	0.000384	NA	NA	0	0.967	0.555	0.979	0.958	0.919	0.536	1.683	0.486	0.986	0.816	0.829	0.68
							exm570595	rs143614248	462.893	NA	PPIL6	NS	0.254	0.17	0.000463883	<0.001	0.53	0.000233	NA	NA	0	NA	NA	0	<0.001	0.4	0.000384	0.376	0.35	0.001486	1.011	0.839	0.793	0.554	0.813	0.136	0.716	0.745	1.041	0.473	0.855	0.701
rs339331	6	117210052	167	13	43	2	exm574153	rs2274911	-79.348	0.781	GPRC6A	NS	0.875	1.3e-05	0.300199	0.776	8.7e-05	0.2379	0.896	0.48	0.2717	0.908	0.081	0.4332	0.945	0.38	0.2657	0.857	0.027	0.2542	0.981	0.329	1.063	0.437	1.06	0.212	0.93	0.715	0.974	0.208	1.071	0.41
							exm574533	rs139467403	476.729	NA	ROS1	NS	>999.999	0.013	0	NA	NA	0	NA	NA	0	NA	NA	0	>999.999	0.16	0	>999.999	0.036	0	1.021	0.0365	0.938	0.319	1.045	0.0634	1.003	0.985	1.018	0.103	0.947	0.427
							exm573693	NA	-348.461	NA	BET3L	NS	7.253	0.042	6.62691e-05	7.196	0.043	0.000233	NA	NA	0	NA	NA	0	NA	NA	0	NA	NA	0	1.035	0.811	1.035	0.811	1.172	0.601	1.172	0.601	1.07	0.653	1.07	0.653
							exm573789	rs149463940	-261.181	NA	RSPH4A	NS	2.792	0.049	0.000397614	2.708	0.056	0.001398	NA	NA	0	NA	NA	0	NA	NA	0	NA	NA	0	1.019	0.516	1.171	0.209	0.91	0.165	0.58	0.185	1.033	0.28	1.304	0.0381
							exm573936	rs148338986	-196.738	NA	KPNA5	NS	2.792	0.049	0.000397614	2.708	0.056	0.001398	NA	NA	0	NA	NA	0	NA	NA	0	NA	NA	0	0.953	0.7	0.953	0.7	1.021	0.94	1.021	0.94	0.983	0.895	0.983	0.895
							exm573571	rs140975523	-452.301	NA	DSE	NS	1.879	0.066	0.00112657	2.122	0.029	0.003728	NA	NA	0	NA	NA	0	<0.001	0.23	0.000384	NA	NA	0	0.994	0.833	1.409	0.062	0.994	0.938	1.304	0.56	0.996	0.898	1.424	0.066
							exm573714	rs145628712	-330.83	NA	FAM26D	NS	0.176	0.066	0.000596421	<0.001	0.48	0.000233	NA	NA	0	NA	NA	0	0.854	0.91	0.000384	<0.001	0.061	0.002081	0.526	0.258	0.526	0.258	<0.001	0.363	<0.001	0.363	0.624	0.411	0.624	0.411
							exm573657	rs140516625	-376.999	0.003	FAM26E	NS	1.401	0.076	0.00417716	1.472	0.31	0.004202	5.974	0.13	0.001241	NA	NA	0	1.024	0.96	0.004992	1.524	0.11	0.009215	1.168	0.0596	1.168	0.0596	1.182	0.396	1.182	0.396	1.141	0.133	1.141	0.133
							exm573602	rs61742007	-426.95	NA	FAM26F	NS	1.447	0.11	0.00284995	1.459	0.1	0.01002	NA	NA	0	NA	NA	0	NA	NA	0	NA	NA	0	0.992	0.769	1.006	0.958	0.986	0.835	0.934	0.796	1.002	0.957	1.048	0.674
							exm573898	rs145364204	-228.144	NA	ZUFSP	NS	>999.999	0.17	0	NA	NA	0	NA	NA	0	NA	NA	0	NA	NA	0	>999.999	0.15	0	1.004	0.877	1.255	0.226	0.987	0.844	0.941	0.907	1.016	0.578	1.302	0.178
							exm574168	rs9489056	-11.564	0.006	RFX6	NS	1.131	0.19	0.0222001	1.099	0.32	0.07665	NA	NA	0	NA	NA	0	1.585	0.4	0.002304	>999.999	0.042	0	1.038	0.455	0.913	0.368	1.228	0.0608	0.943	0.806	1.022	0.684	0.941	0.565
							exm574293	rs147909337	379.411	NA	VGLL2	NS	0.291	0.23	0.000397614	0.299	0.24	0.001398	NA	NA	0	NA	NA	0	NA	NA	0	NA	NA	0	1.007	0.966	1.007	0.966	1.457	0.263	1.457	0.263	0.959	0.813	0.959	0.813
							exm573993	NA	-123.743	NA	FAM162B	SP	1.422	0.48	0.000662691	1.333	0.56	0.00233	NA	NA	0	NA	NA	0	NA	NA	0	NA	NA	0	1.037	0.787	1.037	0.787	1.088	0.79	1.088	0.79	1.028	0.847	1.028	0.847
rs1933488	6	153441079	21	5	2	1	exm588633	rs17710008	-398.044	0.002	MYCT1	NS	1.089	0.033	0.132074	1.034	0.79	0.05103	0.981	0.9	0.2953	0.992	0.93	0.1128	1.145	0.052	0.2143	1.215	0.012	0.1558	1.089	0.0297	1.083	0.698	1.128	0.184	1.006	0.991	1.094	0.0298	1.097	0.67
							exm587769	rs147998933	-825.961	NA	SYNE1	NS	11.824	0.0039	6.62691e-05	>999.999	0.059	0	NA	NA	0	NA	NA	0	NA	NA	0	7.802	0.03	0.0002973	0.997	0.721	0.98	0.491	1.014	0.441	0.984	0.827	0.993	0.424	0.967	0.274
							exm588767	rs148961474	-117.509	0.001	MTRF1L	NS	0.371	0.2	0.000530152	<0.001	0.44	0.000233	NA	NA	0	NA	NA	0	0.412	0.43	0.001152	0.476	0.5	0.001189	0.426	0.179	0.426	0.179	<0.001	0.356	<0.001	0.356	0.507	0.293	0.507	0.293
							exm588708	rs41302051	-144.607	0.002	FBXO5	NS	0.811	0.29	0.00497018	1.576	0.37	0.002097	2.16	0.59	0.001241	<0.001	0.35	0.0002485	1.059	0.87	0.006912	0.561	0.055	0.01367	0.976	0.398	0.814	0.284	1.003	0.964	1.378	0.377	0.974	0.396	0.718	0.119
							exm588785	rs140067731	-108.219	NA	RGS17	NS	<0.001	0.52	6.64187e-05	<0.001	0.53	0.0002334	NA	NA	0	NA	NA	0	NA	NA	0	NA	NA	0	0.507	0.343	0.507	0.343	<0.001	0.503	<0.001	0.503	0.59	0.466	0.59	0.466
rs9364554	6	160833664	165	6	3	1	exm2275925	rs78899680	-256.601	NA	SLC22A1	NS	1.72	0.003	0.00437376	1.708	0.0048	0.01421	NA	NA	0	NA	NA	0	>999.999	0.2	0	1.228	0.78	0.001486	1.022	0.207	1.084	0.141	1.108	0.00911	0.988	0.931	1.008	0.658	1.104	0.0834
							exm592131	rs150809922	-385.349	NA	IGF2R	NS	1.578	0.028	0.00338062	1.6	0.031	0.01096	NA	NA	0	NA	NA	0	1.513	0.58	0.001153	<0.001	0.45	0.0002973	0.999	0.979	0.977	0.585	0.992	0.872	0.92	0.449	1.002	0.934	0.977	0.604
							exm592834	rs41267807	119.152	0.046	LPA	NS	1.501	0.031	0.00417495	1.748	0.24	0.00233	4.742	0.16	0.001241	>999.999	0.11	0	1.84	0.17	0.003072	1.242	0.37	0.01308	1.021	0.303	1.156	0.0804	0.983	0.72	1.004	0.986	1.027	0.207	1.204	0.031
							exm592719	rs145369394	-154.074	NA	SLC22A2	NS	3.113	0.037	0.000331345	2.979	0.046	0.001165	NA	NA	0	NA	NA	0	NA	NA	0	NA	NA	0	0.996	0.913	0.955	0.626	0.895	0.284	0.951	0.836	1.002	0.968	0.957	0.665
							exm593135	rs138242513	304.116	NA	PLG	NS	4.608	0.042	0.000132556	4.882	0.032	0.000466	NA	NA	0	NA	NA	0	NA	NA	0	NA	NA	0	0.961	0.559	0.962	0.718	0.997	0.985	1.148	0.559	0.954	0.514	0.913	0.423
							exm592779	rs149424049	30.132	NA	SLC22A3	NS	<0.001	0.26	0.000198807	NA	NA	0	NA	NA	0	NA	NA	0	NA	NA	0	<0.001	0.23	0.0008918	0.993	0.991	0.993	0.991	2.128	0.468	2.128	0.468	0.882	0.854	0.882	0.854
rs12155172	7	20994491	71	3	0	0	exm607905	rs193255587	-303.45	0.005	ABCB5	SP	>999.999	0.0024	0	>999.999	0.13	0	NA	NA	0	NA	NA	0	NA	NA	0	>999.999	0.0067	0	0.992	0.558	1.058	0.321	0.995	0.87	0.903	0.496	0.991	0.535	1.06	0.328
							exm2146093	rs138646408	475.189	NA	SP4	NS	4.246	0.067	0.000132538	2.508	0.5	0.000233	NA	NA	0	>999.999	0.21	0	>999.999	0.21	0	1.826	0.67	0.0002973	0.938	0.484	0.924	0.748	0.806	0.325	1.527	0.357	0.972	0.766	0.859	0.57
							exm608116	rs139917829	-169.276	NA	SP8	NS	1.528	0.76	6.63042e-05	NA	NA	0	NA	NA	0	NA	NA	0	NA	NA	0	1.71	0.7	0.0002973	1.023	0.902	1.023	0.902	0.836	0.731	0.836	0.731	1.045	0.824	1.045	0.824
rs10486567	7	27976563	15	3	0	0	exm2147531	NA	-144.832	NA	TAX1BP1	NS	<0.001	0.1	0.000265076	<0.001	0.19	0.000699	NA	NA	0	NA	NA	0	<0.001	0.36	0.000384	NA	NA	0	1.041	0.47	0.993	0.959	0.761	0.0644	0.7	0.359	1.083	0.175	1.067	0.643
							exm611277	rs147879630	-405.657	NA	HIBADH	NS	0.666	0.36	0.00125911	0.588	0.25	0.004427	NA	NA	0	NA	NA	0	>999.999	0.36	0	NA	NA	0	0.678	0.3	0.678	0.3	1.307	0.717	1.307	0.717	0.65	0.288	0.65	0.288
							exm611404	rs143697346	-104.097	NA	JAZF1	NS	0.99	0.98	0.00072896	<0.001	0.28	0.000699	NA	NA	0	NA	NA	0	4.621	0.14	0.000384	0.571	0.48	0.002081	NA	NA	NA	NA	NA	NA	NA	NA	NA	NA	NA	NA
rs6465657	7	97816327	79	8	54	3	exm2157937	rs79382137	59.022	NA	TECPR1	NS	0.263	0.00095	0.00298211	NA	NA	0	<0.001	0.42	0.001241	0.255	0.00078	0.01093	NA	NA	0	NA	NA	0	1.024	0.425	0.715	0.00253	1.013	0.863	0.61	0.109	1.027	0.393	0.726	0.0068
							exm636388	rs150039146	5.554	NA	LMTK2	NS	0.225	0.03	0.0010603	0.233	0.035	0.003728	NA	NA	0	NA	NA	0	NA	NA	0	NA	NA	0	0.981	0.484	0.91	0.239	1.114	0.0998	0.993	0.969	0.966	0.243	0.921	0.329
							exm636216	rs61733327	-333.843	NA	ASNS	NS	0.369	0.041	0.00132538	<0.001	0.29	0.000466	NA	NA	0	NA	NA	0	0.573	0.45	0.00192	0.287	0.081	0.003864	0.987	0.735	0.875	0.343	0.982	0.841	0.538	0.166	0.978	0.59	0.886	0.416
							exm636273	rs145989167	-198.499	NA	OCM2	ST	0.376	0.041	0.00159046	0.388	0.047	0.005592	NA	NA	0	NA	NA	0	NA	NA	0	NA	NA	0	0.376	0.0406	0.376	0.0406	0.764	0.792	0.764	0.792	0.356	0.0475	0.356	0.0475
							exm636812	rs144083350	117.188	NA	BAIAP2L1	NS	<0.001	0.081	0.000331433	<0.001	0.2	0.0006993	NA	NA	0	<0.001	0.5	0.0002486	<0.001	0.4	0.000384	NA	NA	0	1.034	0.689	0.931	0.632	0.784	0.296	0.45	0.11	1.067	0.465	0.981	0.904
							exm2157940	rs183180327	95.39	NA	BRI3	NS	1.899	0.14	0.00072896	NA	NA	0	>999.999	0.12	0	1.708	0.24	0.002734	NA	NA	0	NA	NA	0	1.884	0.112	1.884	0.112	4.217	0.0155	4.217	0.0155	1.454	0.406	1.454	0.406
							exm636912	rs115375965	430.631	0.008	NPTX2	NS	1.237	0.27	0.00444062	1.396	0.27	0.006061	3.707	0.27	0.001241	NA	NA	0	1.409	0.4	0.004224	0.856	0.64	0.008621	1.118	0.495	1.118	0.495	0.925	0.854	0.925	0.854	1.183	0.319	1.183	0.319
							exm636206	rs147325765	-447.099	NA	TAC1	NS	<0.001	0.53	6.62691e-05	<0.001	0.49	0.000233	NA	NA	0	NA	NA	0	NA	NA	0	NA	NA	0	<0.001	0.53	<0.001	0.53	<0.001	0.862	<0.001	0.862	<0.001	0.554	<0.001	0.554
rs2928679	8	23438975	94	9	1	1	exm689441	rs34737614	-356.432	NA	TNFRSF10A	NS	<0.001	0.012	0.000861498	NA	NA	0	NA	NA	0	<0.001	0.014	0.003231	NA	NA	0	NA	NA	0	1.005	0.832	0.594	0.0107	0.945	0.332	0.629	0.363	1.013	0.617	0.581	0.0142
							exm2169807	rs142252012	-213.243	NA	LOXL2	NS	0.29	0.014	0.00178926	NA	NA	0	0.366	0.37	0.006203	0.248	0.015	0.005467	NA	NA	0	NA	NA	0	0.955	0.14	0.91	0.559	0.955	0.544	1.142	0.718	0.958	0.185	0.886	0.482
							exm689755	rs142298900	-144.33	NA	ENTPD4	NS	<0.001	0.02	0.000596421	<0.001	0.086	0.001398	NA	NA	0	NA	NA	0	<0.001	0.3	0.000384	<0.001	0.28	0.0005945	1.052	0.14	1.12	0.249	1.115	0.183	1.146	0.569	1.042	0.261	1.118	0.282
							exm689524	rs2272761	-290.035	0.001	R3HCC1	NS	1.064	0.032	0.421925	1.123	0.03	0.5387	0.958	0.81	0.1973	1.063	0.35	0.2376	1.131	0.039	0.5568	0.955	0.44	0.4429	1.028	0.058	NA	NA	0.982	0.601	NA	NA	1.035	0.0281	NA	NA
							exm689306	rs61755333	-435.578	NA	TNFRSF10D	NS	0.391	0.05	0.00159046	0.423	0.26	0.002097	0.305	0.11	0.01613	NA	NA	0	<0.001	0.33	0.000384	1.826	0.67	0.0002973	0.969	0.0311	0.956	0.155	0.938	0.121	0.851	0.119	0.975	0.101	0.973	0.404
							exm689453	NA	-334.562	NA	CHMP7	NS	6.184	0.081	6.62691e-05	NA	NA	0	NA	NA	0	NA	NA	0	>999.999	0.38	0	4.244	0.2	0.0002973	0.984	0.895	1.111	0.745	1.029	0.923	0.589	0.601	0.967	0.795	1.159	0.662
							exm689215	rs144392720	-466.693	NA	TNFRSF10C	SP	0.752	0.11	0.0074884	0.784	0.21	0.0219	0.305	0.11	0.01613	NA	NA	0	0.956	0.94	0.00192	1.826	0.67	0.0002973	1.041	0.55	0.858	0.204	1.038	0.823	0.789	0.453	1.031	0.67	0.864	0.252
							exm689911	rs150986463	269.912	NA	STC1	NS	<0.001	0.44	6.62691e-05	<0.001	0.47	0.000233	NA	NA	0	NA	NA	0	NA	NA	0	NA	NA	0	<0.001	0.44	<0.001	0.44	<0.001	0.827	<0.001	0.827	<0.001	0.474	<0.001	0.474
							exm689825	rs3736032	-15.278	0.074	SLC25A37	NS	1.032	0.46	0.128429	0.999	0.98	0.1918	1.305	0.24	0.1005	0.977	0.76	0.1732	1.1	0.5	0.04301	1.168	0.17	0.06688	1.032	0.458	NA	NA	0.826	0.0858	NA	NA	1.052	0.253	NA	NA
rs1512268	8	23526463	65	7	0	0	exm689441	rs34737614	-443.92	NA	TNFRSF10A	NS	<0.001	0.012	0.000861498	NA	NA	0	NA	NA	0	<0.001	0.014	0.003231	NA	NA	0	NA	NA	0	1.005	0.832	0.594	0.0107	0.945	0.332	0.629	0.363	1.013	0.617	0.581	0.0142
							exm2169807	rs142252012	-300.731	NA	LOXL2	NS	0.29	0.014	0.00178926	NA	NA	0	0.366	0.37	0.006203	0.248	0.015	0.005467	NA	NA	0	NA	NA	0	0.955	0.14	0.91	0.559	0.955	0.544	1.142	0.718	0.958	0.185	0.886	0.482
							exm689755	rs142298900	-231.818	NA	ENTPD4	NS	<0.001	0.02	0.000596421	<0.001	0.086	0.001398	NA	NA	0	NA	NA	0	<0.001	0.3	0.000384	<0.001	0.28	0.0005945	1.052	0.14	1.12	0.249	1.115	0.183	1.146	0.569	1.042	0.261	1.118	0.282
							exm689524	rs2272761	-377.523	0.003	R3HCC1	NS	1.064	0.032	0.421925	1.123	0.03	0.5387	0.958	0.81	0.1973	1.063	0.35	0.2376	1.131	0.039	0.5568	0.955	0.44	0.4429	1.028	0.058	NA	NA	0.982	0.601	NA	NA	1.035	0.0281	NA	NA
							exm689453	NA	-422.05	NA	CHMP7	NS	6.184	0.081	6.62691e-05	NA	NA	0	NA	NA	0	NA	NA	0	>999.999	0.38	0	4.244	0.2	0.0002973	0.984	0.895	1.111	0.745	1.029	0.923	0.589	0.601	0.967	0.795	1.159	0.662
							exm689911	rs150986463	182.424	NA	STC1	NS	<0.001	0.44	6.62691e-05	<0.001	0.47	0.000233	NA	NA	0	NA	NA	0	NA	NA	0	NA	NA	0	<0.001	0.44	<0.001	0.44	<0.001	0.827	<0.001	0.827	<0.001	0.474	<0.001	0.474
							exm689825	rs3736032	-102.766	0.019	SLC25A37	NS	1.032	0.46	0.128429	0.999	0.98	0.1918	1.305	0.24	0.1005	0.977	0.76	0.1732	1.1	0.5	0.04301	1.168	0.17	0.06688	1.032	0.458	NA	NA	0.826	0.0858	NA	NA	1.052	0.253	NA	NA
rs11135910	8	25892142	10	3	0	0	exm691177	NA	473.551	NA	PNMA2	NS	>999.999	0.0045	0	NA	NA	0	>999.999	0.071	0	NA	NA	0	NA	NA	0	>999.999	0.017	0	0.99	0.792	1.327	0.202	1.027	0.77	1.034	0.956	0.989	0.781	1.369	0.178
							exm691142	rs140691550	373.662	NA	BNIP3L	NS	<0.001	0.27	0.000132538	<0.001	0.47	0.000233	NA	NA	0	NA	NA	0	NA	NA	0	<0.001	0.46	0.0002973	<0.001	0.268	<0.001	0.268	<0.001	0.749	<0.001	0.749	<0.001	0.304	<0.001	0.304
							exm691008	rs17054477	-184.011	NA	EBF2	NS	1.039	0.65	0.0308855	1.023	0.79	0.09977	0.709	0.77	0.004963	2.743	0.11	0.000994	1.047	0.89	0.007296	0.851	0.77	0.00327	1.039	0.648	NA	NA	0.739	0.197	NA	NA	1.072	0.429	NA	NA
rs7008482	8	126267630	40	5	2	1	exm720404	rs150026441	-176.556	NA	KIAA0196	NS	2.139	0.0066	0.00152419	2.121	0.011	0.004893	NA	NA	0	NA	NA	0	2.545	0.4	0.000384	1.9	0.65	0.0002973	1.29	0.117	1.29	0.117	1.541	0.222	1.541	0.222	1.297	0.128	1.297	0.128
							exm720191	rs10104558	-278.17	0.001	ZNF572	NS	0.823	0.096	0.0150431	0.724	0.3	0.009553	2.004	0.23	0.009926	>999.999	0.03	0	1.172	0.41	0.02112	0.567	0.0026	0.03656	0.996	0.847	1.018	0.898	0.938	0.253	0.539	0.202	1.001	0.979	1.05	0.742
							exm720442	NA	-104.158	NA	NSMCE2	NS	0.615	0.14	0.00245195	NA	NA	0	<0.001	0.67	0.001241	0.627	0.17	0.008698	NA	NA	0	<0.001	0.49	0.0002973	0.879	0.501	0.879	0.501	1.575	0.223	1.575	0.223	0.773	0.229	0.773	0.229
							exm720255	rs141216229	-243.815	NA	SQLE	NS	1.461	0.21	0.00165673	1.47	0.2	0.005825	NA	NA	0	NA	NA	0	NA	NA	0	NA	NA	0	1.258	0.274	1.258	0.274	2.016	0.0802	2.016	0.0802	1.139	0.568	1.139	0.568
							exm720518	rs16900603	181.044	NA	TRIB1	NS	1.07	0.49	0.0210736	1.077	0.46	0.0713	<0.001	0.34	0.002481	NA	NA	0	1.004	0.99	0.00384	>999.999	0.15	0	1.11	0.705	1.11	0.705	1.173	0.793	1.173	0.793	1.06	0.843	1.06	0.843
rs12543663	8	127924659	1	1	0	0	exm720546	rs74942061	-355.235	NA	FAM84B	NS	1.509	0.091	0.00245195	1.481	0.12	0.008155	NA	NA	0	NA	NA	0	2.67	0.38	0.000384	<0.001	0.52	0.0002973	1.509	0.0907	1.509	0.0907	0.46	0.435	0.46	0.435	1.381	0.231	1.381	0.231
rs10086908	8	128011937	1	1	0	0	exm720546	rs74942061	-442.513	NA	FAM84B	NS	1.509	0.091	0.00245195	1.481	0.12	0.008155	NA	NA	0	NA	NA	0	2.67	0.38	0.000384	<0.001	0.52	0.0002973	1.509	0.0907	1.509	0.0907	0.46	0.435	0.46	0.435	1.381	0.231	1.381	0.231
rs16902094	8	128320346	6	1	0	0	exm720584	rs114570780	430.256	NA	MYC	NS	2.553	0.1	0.000331345	2.544	0.1	0.001165	NA	NA	0	NA	NA	0	NA	NA	0	NA	NA	0	0.986	0.867	1.115	0.407	0.898	0.602	1.098	0.767	1.005	0.952	1.144	0.33
rs445114	8	128323181	6	1	0	0	exm720584	rs114570780	427.421	NA	MYC	NS	2.553	0.1	0.000331345	2.544	0.1	0.001165	NA	NA	0	NA	NA	0	NA	NA	0	NA	NA	0	0.986	0.867	1.115	0.407	0.898	0.602	1.098	0.767	1.005	0.952	1.144	0.33
rs620861	8	128335673	6	1	0	0	exm720584	rs114570780	414.929	NA	MYC	NS	2.553	0.1	0.000331345	2.544	0.1	0.001165	NA	NA	0	NA	NA	0	NA	NA	0	NA	NA	0	0.986	0.867	1.115	0.407	0.898	0.602	1.098	0.767	1.005	0.952	1.144	0.33
rs6983267	8	128413305	6	1	0	0	exm720584	rs114570780	337.297	NA	MYC	NS	2.553	0.1	0.000331345	2.544	0.1	0.001165	NA	NA	0	NA	NA	0	NA	NA	0	NA	NA	0	0.986	0.867	1.115	0.407	0.898	0.602	1.098	0.767	1.005	0.952	1.144	0.33
rs7000448	8	128441170	6	1	0	0	exm720584	rs114570780	309.432	NA	MYC	NS	2.553	0.1	0.000331345	2.544	0.1	0.001165	NA	NA	0	NA	NA	0	NA	NA	0	NA	NA	0	0.986	0.867	1.115	0.407	0.898	0.602	1.098	0.767	1.005	0.952	1.144	0.33
rs1447295	8	128485038	6	1	0	0	exm720584	rs114570780	265.564	NA	MYC	NS	2.553	0.1	0.000331345	2.544	0.1	0.001165	NA	NA	0	NA	NA	0	NA	NA	0	NA	NA	0	0.986	0.867	1.115	0.407	0.898	0.602	1.098	0.767	1.005	0.952	1.144	0.33
rs10090154	8	128532137	6	1	0	0	exm720584	rs114570780	218.465	NA	MYC	NS	2.553	0.1	0.000331345	2.544	0.1	0.001165	NA	NA	0	NA	NA	0	NA	NA	0	NA	NA	0	0.986	0.867	1.115	0.407	0.898	0.602	1.098	0.767	1.005	0.952	1.144	0.33
rs1571801	9	124427373	61	6	4	1	exm778231	rs139028645	-346.629	NA	GSN	NS	>999.999	0.012	0	>999.999	0.016	0	NA	NA	0	NA	NA	0	>999.999	0.28	0	NA	NA	0	1.053	0.104	1.022	0.793	1.01	0.9	0.912	0.668	1.062	0.0738	1.053	0.554
							exm2183077	rs190678946	487.298	NA	NDUFA8	NS	>999.999	0.042	0	NA	NA	0	NA	NA	0	NA	NA	0	>999.999	0.054	0	NA	NA	0	1.751	0.215	1.751	0.215	1.653	0.633	1.653	0.633	1.857	0.179	1.857	0.179
							exm778510	rs143836788	109.188	NA	DAB2IP	NS	0.173	0.066	0.000463883	NA	NA	0	NA	NA	0	NA	NA	0	0.193	0.1	0.00192	<0.001	0.32	0.0005945	0.906	0.356	0.906	0.356	1.088	0.731	1.088	0.731	0.856	0.178	0.856	0.178
							exm778613	rs74775599	427.686	NA	TTLL11	NS	1.799	0.075	0.00125945	1.906	0.052	0.004196	NA	NA	0	NA	NA	0	<0.001	0.18	0.000384	NA	NA	0	0.986	0.839	1.202	0.22	0.882	0.446	0.862	0.728	0.989	0.877	1.26	0.14
							exm777861	rs138015820	-552.57	NA	CNTRL	NS	>999.999	0.005	0	NA	NA	0	NA	NA	0	NA	NA	0	>999.999	0.04	0	>999.999	0.057	0	1.015	0.574	0.982	0.744	1.041	0.52	0.903	0.48	1.006	0.827	0.971	0.622
							exm2182993	rs115867734	-310.465	NA	STOM	NS	0.756	0.32	0.0031163	NA	NA	0	<0.001	0.37	0.001241	0.803	0.44	0.01121	<0.001	0.35	0.000384	NA	NA	0	1.046	0.653	0.766	0.331	1.221	0.372	0.701	0.623	1.018	0.865	0.757	0.341
rs10993994	10	51549496	16	4	11	3	exm1681184	rs141659397	35.186	NA	NCOA4	NS	1.612	0.08	0.00198807	NA	NA	0	0.577	0.68	0.002481	1.624	0.085	0.006958	NA	NA	0	NA	NA	0	0.979	0.425	0.939	0.553	0.866	0.0313	0.474	0.0343	0.994	0.821	1.007	0.952
							exm825023	rs146563481	43.09	NA	TIMM23	NS	<0.001	0.28	0.000132538	<0.001	0.31	0.000466	NA	NA	0	NA	NA	0	NA	NA	0	NA	NA	0	0.844	0.811	0.844	0.811	<0.001	0.548	<0.001	0.548	0.996	0.995	0.996	0.995
							exm825187	rs114893748	455.544	NA	ASAH2	NS	1.649	0.32	0.000530152	2.1	0.17	0.001398	NA	NA	0	NA	NA	0	1.254	0.87	0.000384	<0.001	0.37	0.0002973	0.91	0.441	0.91	0.441	1.063	0.836	1.063	0.836	0.889	0.368	0.889	0.368
							exm824928	rs147134999	7.335	NA	MSMB	NS	1.5	0.47	0.000463883	1.215	0.76	0.001398	NA	NA	0	1.682	0.71	0.0002485	>999.999	0.32	0	NA	NA	0	1.5	0.468	1.5	0.468	<0.001	0.519	<0.001	0.519	1.799	0.29	1.799	0.29
rs3850699	10	104414221	107	18	18	4	exm1669803	rs116066839	444.498	NA	NT5C2	NS	4.469	0.027	0.000132538	NA	NA	0	>999.999	0.41	0	3.485	0.083	0.000497	NA	NA	0	NA	NA	0	1.008	0.875	1.122	0.736	1.117	0.327	2.928	0.0275	1.007	0.893	0.811	0.614
							exm851540	rs11191224	-493.877	NA	NOLC1	NS	1.39	0.029	0.00715706	1.48	0.019	0.0205	2.524	0.53	0.001241	NA	NA	0	0.946	0.9	0.004992	1.518	0.49	0.001784	1.069	0.107	1.277	0.0414	1.173	0.111	1.872	0.00987	1.056	0.221	1.211	0.135
							exm852037	rs145677127	-240.548	0	PSD	NS	4.509	0.038	0.000132538	NA	NA	0	NA	NA	0	NA	NA	0	4.417	0.045	0.000768	NA	NA	0	1.026	0.806	1.247	0.239	0.989	0.965	1.459	0.348	1.057	0.617	1.256	0.248
							exm851765	rs141975394	-284.689	NA	GBF1	SP	>999.999	0.047	0	>999.999	0.047	0	NA	NA	0	NA	NA	0	NA	NA	0	NA	NA	0	0.957	0.377	0.949	0.589	0.86	0.229	1.001	0.997	0.973	0.605	0.938	0.538
							exm851602	rs144698667	-425.609	NA	ELOVL3	NS	>999.999	0.054	0	NA	NA	0	NA	NA	0	NA	NA	0	>999.999	0.13	0	>999.999	0.2	0	0.921	0.473	1.211	0.635	1.05	0.852	1.01	0.993	0.892	0.354	1.183	0.695
							exm852739	NA	224.046	NA	AS3MT	SP	>999.999	0.077	0	NA	NA	0	NA	NA	0	NA	NA	0	>999.999	0.24	0	>999.999	0.16	0	0.992	0.869	0.912	0.622	1.086	0.468	1.149	0.746	0.971	0.577	0.84	0.391
							exm852612	rs146098584	158.461	NA	C10orf26	NS	2.103	0.086	0.000662691	1.93	0.14	0.00233	NA	NA	0	NA	NA	0	>999.999	0.3	0	NA	NA	0	1.011	0.703	0.926	0.767	1.103	0.164	0.739	0.678	0.998	0.954	0.96	0.882
							exm852528	rs187318251	73.978	NA	SFXN2	NS	1.684	0.097	0.00139165	1.622	0.13	0.004893	NA	NA	0	NA	NA	0	NA	NA	0	>999.999	0.17	0	1.054	0.642	1.286	0.212	1.437	0.134	1.788	0.14	1.013	0.912	1.232	0.334
							exm851915	NA	-254.035	NA	NFKB2	NS	>999.999	0.12	0	NA	NA	0	NA	NA	0	NA	NA	0	>999.999	0.42	0	>999.999	0.16	0	1.197	0.313	1.197	0.313	1.065	0.891	1.065	0.891	1.254	0.223	1.254	0.223
							exm852294	rs147686008	-178.542	NA	TMEM180	NS	>999.999	0.2	0	>999.999	0.2	0	NA	NA	0	NA	NA	0	NA	NA	0	NA	NA	0	0.977	0.883	0.977	0.883	1.203	0.596	1.203	0.596	0.915	0.597	0.915	0.597
							exm852461	rs61758111	2.426	NA	TRIM8	NS	<0.001	0.2	0.000198807	NA	NA	0	NA	NA	0	NA	NA	0	<0.001	0.48	0.000384	<0.001	0.3	0.0005945	0.953	0.689	1.039	0.943	1.144	0.628	1.629	0.645	0.91	0.472	1.058	0.923
							exm852148	rs190809867	-230.617	NA	CUEDC2	NS	0.498	0.21	0.000928259	0.556	0.3	0.003029	NA	NA	0	NA	NA	0	NA	NA	0	<0.001	0.47	0.0002973	0.594	0.0995	0.594	0.0995	1.557	0.403	1.557	0.403	0.442	0.0265	0.442	0.0265
							exm852389	rs148160011	-55.017	NA	SUFU	NS	<0.001	0.21	0.000132538	NA	NA	0	NA	NA	0	NA	NA	0	<0.001	0.33	0.000384	<0.001	0.44	0.0002973	0.773	0.191	0.773	0.191	0.18	0.0552	0.18	0.0552	0.871	0.492	0.871	0.492
							exm852682	rs61754263	182.836	0.002	CYP17A1	NS	0.448	0.3	0.000596421	<0.001	0.46	0.000233	NA	NA	0	NA	NA	0	1.315	0.85	0.000384	0.301	0.24	0.002081	0.408	0.149	0.408	0.149	1.113	0.918	1.113	0.918	0.171	0.054	0.171	0.054
							exm2274436	NA	31.449	NA	ARL3	NS	0.676	0.45	0.000927767	NA	NA	0	NA	NA	0	0.706	0.51	0.003479	NA	NA	0	NA	NA	0	0.676	0.453	0.676	0.453	<0.001	0.374	<0.001	0.374	0.801	0.672	0.801	0.672
							exm852706	NA	208.423	NA	C10orf32	NS	<0.001	0.45	6.62691e-05	NA	NA	0	NA	NA	0	<0.001	0.42	0.0002485	NA	NA	0	NA	NA	0	<0.001	0.447	<0.001	0.447	<0.001	0.812	<0.001	0.812	<0.001	0.483	<0.001	0.483
							exm852834	NA	422.681	NA	CNNM2	NS	<0.001	0.54	6.62691e-05	NA	NA	0	NA	NA	0	NA	NA	0	NA	NA	0	<0.001	0.51	0.0002973	0.96	0.81	0.96	0.81	0.637	0.373	0.637	0.373	1.03	0.866	1.03	0.866
							exm852190	rs73349055	-203.36	NA	C10orf95	NS	1.01	0.88	0.0499669	0.997	0.96	0.1657	>999.999	0.017	0	NA	NA	0	1.101	0.7	0.01229	0.974	0.96	0.00327	1.01	0.882	NA	NA	0.981	0.914	NA	NA	1.026	0.723	NA	NA
rs4962416	10	126696872	45	6	27	2	exm863447	rs148643707	18.426	NA	CTBP2	NS	0.305	0.1	0.00072896	<0.001	0.5	0.000233	NA	NA	0	NA	NA	0	<0.001	0.1	0.001536	0.626	0.56	0.001784	1.02	0.495	0.974	0.836	0.934	0.34	1.073	0.815	1.036	0.253	0.954	0.727
							exm863026	rs140442850	-384.945	NA	FAM53B	NS	>999.999	0.11	0	>999.999	0.12	0	NA	NA	0	NA	NA	0	NA	NA	0	NA	NA	0	0.908	0.632	0.908	0.632	1.25	0.599	1.25	0.599	0.827	0.389	0.827	0.389
							exm863129	rs138061690	-218.003	NA	METTL10	NS	1.457	0.19	0.001723	1.549	0.14	0.005592	NA	NA	0	NA	NA	0	0.792	0.87	0.000384	<0.001	0.55	0.0002973	1.03	0.888	1.03	0.888	1.684	0.221	1.684	0.221	0.979	0.926	0.979	0.926
							exm863193	rs143568810	-65.665	NA	ZRANB1	NS	0.829	0.23	0.00881378	0.813	0.2	0.03006	NA	NA	0	NA	NA	0	1.693	0.47	0.001152	<0.001	0.54	0.0002973	0.893	0.425	0.893	0.425	0.654	0.31	0.654	0.31	0.954	0.748	0.954	0.748
							exm863183	NA	-173.46	NA	FAM175B	NS	<0.001	0.24	0.000132538	NA	NA	0	NA	NA	0	<0.001	0.4	0.0002485	NA	NA	0	<0.001	0.45	0.0002973	0.812	0.624	0.812	0.624	0.74	0.77	0.74	0.77	0.89	0.79	0.89	0.79
							exm862968	rs147232465	-524	NA	LHPP	NS	<0.001	0.22	0.000132538	NA	NA	0	NA	NA	0	<0.001	0.43	0.0002485	<0.001	0.32	0.000384	NA	NA	0	0.975	0.608	0.904	0.529	1.091	0.442	0.954	0.904	0.951	0.346	0.807	0.222
rs7127900	11	2233574	154	16	28	6	exm878315	rs142056890	102.175	NA	TSPAN32	NS	0.305	0.0054	0.00212061	0.292	0.22	0.001631	<0.001	0.19	0.002481	NA	NA	0	0.331	0.16	0.002304	0.328	0.062	0.005054	0.917	0.253	0.774	0.0137	0.598	0.021	0.33	0.00244	0.956	0.571	0.835	0.0936
							exm877597	rs143303623	-375.585	0	SYT8	ST	10.926	0.0059	6.62691e-05	NA	NA	0	NA	NA	0	NA	NA	0	>999.999	0.18	0	8.857	0.017	0.0002973	0.969	0.211	0.968	0.697	1.017	0.785	1.32	0.095	0.952	0.071	0.895	0.22
							exm878447	rs148256948	190.516	NA	TSSC4	NS	<0.001	0.011	0.000596421	NA	NA	0	NA	NA	0	NA	NA	0	<0.001	0.041	0.001536	<0.001	0.097	0.001486	0.988	0.714	0.799	0.00902	1.038	0.624	0.815	0.346	0.983	0.606	0.793	0.0111
							exm878526	rs147507650	193.219	NA	TRPM5	NS	0.14	0.028	0.000795229	0.148	0.035	0.002796	NA	NA	0	NA	NA	0	NA	NA	0	NA	NA	0	1.016	0.335	0.949	0.563	0.984	0.691	0.675	0.129	1.017	0.346	0.996	0.966
							exm878938	rs1800172	635.555	NA	KCNQ1	NS	1.234	0.036	0.0182903	1.615	0.0081	0.01608	1.542	0.51	0.009926	1.1	0.45	0.04747	1.229	0.74	0.00192	0.707	0.77	0.0008918	1.065	0.321	0.88	0.482	1.085	0.594	0.803	0.633	1.045	0.517	0.779	0.222
							exm878273	rs188839109	89.515	0.001	C11orf21	NS	1.345	0.068	0.00569914	1.127	0.77	0.003961	0.674	0.73	0.004963	NA	NA	0	1.708	0.073	0.007296	1.254	0.33	0.01367	0.97	0.357	1.345	0.0677	0.964	0.648	1.625	0.144	0.973	0.445	1.343	0.0842
							exm877435	NA	-458.764	NA	CTSD	NS	<0.001	0.071	0.000198807	NA	NA	0	NA	NA	0	NA	NA	0	<0.001	0.051	0.001152	NA	NA	0	1.035	0.581	0.91	0.574	1.027	0.852	1.026	0.944	1.041	0.54	0.921	0.646
							exm877731	rs11545725	-330.781	0.003	LSP1	NS	1.066	0.11	0.144803	1.103	0.092	0.274	1.31	0.14	0.1538	0.981	0.85	0.08751	0.961	0.71	0.07565	1.098	0.33	0.09935	1.058	0.152	1.006	0.969	1.142	0.157	1.542	0.202	1.052	0.224	0.974	0.88
							exm878087	NA	-63.215	NA	INS-IGF2	NS	5.335	0.11	6.62691e-05	5.197	0.11	0.000233	NA	NA	0	NA	NA	0	NA	NA	0	NA	NA	0	0.968	0.261	1.048	0.838	0.887	0.083	1.252	0.656	0.979	0.492	1.031	0.9
							exm878134	rs138291013	-47.966	NA	TH	NS	>999.999	0.14	0	NA	NA	0	NA	NA	0	>999.999	0.15	0	NA	NA	0	NA	NA	0	0.987	0.947	0.987	0.947	0.744	0.617	0.744	0.617	1.043	0.843	1.043	0.843
							exm878037	NA	-72.144	NA	IGF2	ST	0.494	0.29	0.000596421	<0.001	0.41	0.000466	<0.001	0.5	0.001241	NA	NA	0	0.24	0.17	0.00192	3.651	0.26	0.0002973	0.958	0.532	1.064	0.66	0.816	0.214	0.231	0.0253	0.97	0.675	1.175	0.27
							exm878105	rs139264769	-52.386	NA	INS	NS	0.457	0.31	0.000530152	0.447	0.3	0.001864	NA	NA	0	NA	NA	0	NA	NA	0	NA	NA	0	0.775	0.605	0.775	0.605	<0.001	0.38	<0.001	0.38	0.757	0.597	0.757	0.597
							exm877659	rs141603884	-371.722	NA	TNNI2	NS	>999.999	0.32	0	NA	NA	0	NA	NA	0	NA	NA	0	>999.999	0.39	0	NA	NA	0	>999.999	0.167	>999.999	0.167		NA		NA	>999.999	0.128	>999.999	0.128
							exm877897	rs34134444	-261.431	0.004	MRPL23	NS	0.965	0.5	0.07833	0.968	0.74	0.08178	1.185	0.36	0.17	0.878	0.13	0.1252	1.076	0.63	0.03495	1.002	0.99	0.02943	0.982	0.584	0.657	0.545	0.912	0.263	1.728	0.609	0.974	0.462	0.5	0.384
							exm877844	rs144957238	-278.374	NA	TNNT3	NS	<0.001	0.51	6.62691e-05	NA	NA	0	NA	NA	0	NA	NA	0	NA	NA	0	<0.001	0.48	0.0002973	<0.001	0.508	<0.001	0.508	<0.001	0.809	<0.001	0.809	<0.001	0.542	<0.001	0.542
							exm877423	rs190833491	-464.489	0.002	IFITM10	NS	1.083	0.68	0.0045063	0.987	0.98	0.002563	2.067	0.62	0.001241	>999.999	0.25	0	0.878	0.67	0.009217	1.254	0.43	0.009512	1.083	0.679	1.083	0.679	1.374	0.43	1.374	0.43	1.059	0.778	1.059	0.778
rs12418451	11	68935419	133	9	16	1	exm935900	rs145545074	-161.864	NA	MRGPRF	NS	2.003	0.0026	0.00238569	1.807	0.013	0.008388	NA	NA	0	NA	NA	0	>999.999	0.063	0	>999.999	0.17	0	1.05	0.0956	2.121	0.000302	1.116	0.114	1.245	0.717	1.042	0.189	2.133	0.000481
							exm936070	rs147476406	-82.03	NA	TPCN2	NS	1.754	0.023	0.00231942	1.882	0.011	0.007689	NA	NA	0	NA	NA	0	<0.001	0.14	0.000768	NA	NA	0	1.034	0.204	1.23	0.0424	1.044	0.501	1.151	0.581	1.032	0.25	1.24	0.0463
							exm935718	rs149577588	-231.445	NA	IGHMBP2	NS	7.893	0.027	6.62691e-05	8.848	0.018	0.000233	NA	NA	0	NA	NA	0	NA	NA	0	NA	NA	0	0.986	0.717	0.934	0.358	1.162	0.134	1.353	0.0577	0.96	0.342	0.88	0.111
							exm936140	rs12274095	128.348	0.017	MYEOV	NS	1.174	0.027	0.0334351	1.152	0.35	0.03102	1.397	0.47	0.01861	1.299	0.63	0.00249	1.023	0.85	0.05188	1.279	0.031	0.06276	1.013	0.288	0.921	0.475	0.968	0.262	0.744	0.345	1.02	0.108	0.924	0.517
							exm935565	rs148535951	-271.351	0.003	MRPL21	NS	2.477	0.04	0.000530152	<0.001	0.22	0.000699	NA	NA	0	NA	NA	0	2.006	0.32	0.001152	6.937	0.0052	0.0005945	0.95	0.486	1.176	0.215	0.876	0.495	1.247	0.486	0.976	0.754	1.169	0.263
							exm935365	rs144447314	-454.562	NA	MTL5	NS	2.976	0.043	0.000331345	3.62	0.026	0.000932	NA	NA	0	NA	NA	0	0.839	0.9	0.000384	NA	NA	0	0.991	0.866	0.953	0.724	1.024	0.843	1.262	0.412	0.998	0.972	0.931	0.621
							exm1733364	rs117897496	-186.994	NA	MRGPRD	NS	0.214	0.11	0.000596421	NA	NA	0	NA	NA	0	0.229	0.13	0.002237	NA	NA	0	NA	NA	0	0.981	0.859	0.981	0.859	1.065	0.816	1.065	0.816	0.977	0.842	0.977	0.842
							exm935493	rs144866081	-373.119	NA	CPT1A	NS	>999.999	0.13	0	NA	NA	0	NA	NA	0	NA	NA	0	>999.999	0.13	0	NA	NA	0	0.987	0.849	0.921	0.493	1.089	0.603	0.752	0.381	0.972	0.709	0.925	0.537
							exm935343	rs139127322	-476.975	NA	GAL	NS	<0.001	0.4	6.62778e-05	NA	NA	0	NA	NA	0	NA	NA	0	<0.001	0.48	0.000384	NA	NA	0	1.082	0.577	1.082	0.577	1.453	0.225	1.453	0.225	1.009	0.955	1.009	0.955
rs11228565	11	68978580	128	9	19	1	exm935900	rs145545074	-205.025	NA	MRGPRF	NS	2.003	0.0026	0.00238569	1.807	0.013	0.008388	NA	NA	0	NA	NA	0	>999.999	0.063	0	>999.999	0.17	0	1.05	0.0956	2.121	0.000302	1.116	0.114	1.245	0.717	1.042	0.189	2.133	0.000481
							exm936151	rs2220247	477.589	NA	CCND1	NS	>999.999	0.017	0	>999.999	0.039	0	>999.999	0.036	0	NA	NA	0	NA	NA	0	NA	NA	0	0.954	0.101	>999.999	0.0173	0.974	0.695		NA	0.953	0.115	>999.999	0.00865
							exm936070	rs147476406	-125.191	NA	TPCN2	NS	1.754	0.023	0.00231942	1.882	0.011	0.007689	NA	NA	0	NA	NA	0	<0.001	0.14	0.000768	NA	NA	0	1.034	0.204	1.23	0.0424	1.044	0.501	1.151	0.581	1.032	0.25	1.24	0.0463
							exm935718	rs149577588	-274.606	NA	IGHMBP2	NS	7.893	0.027	6.62691e-05	8.848	0.018	0.000233	NA	NA	0	NA	NA	0	NA	NA	0	NA	NA	0	0.986	0.717	0.934	0.358	1.162	0.134	1.353	0.0577	0.96	0.342	0.88	0.111
							exm936140	rs12274095	85.187	0.081	MYEOV	NS	1.174	0.027	0.0334351	1.152	0.35	0.03102	1.397	0.47	0.01861	1.299	0.63	0.00249	1.023	0.85	0.05188	1.279	0.031	0.06276	1.013	0.288	0.921	0.475	0.968	0.262	0.744	0.345	1.02	0.108	0.924	0.517
							exm935565	rs148535951	-314.512	0.005	MRPL21	NS	2.477	0.04	0.000530152	<0.001	0.22	0.000699	NA	NA	0	NA	NA	0	2.006	0.32	0.001152	6.937	0.0052	0.0005945	0.95	0.486	1.176	0.215	0.876	0.495	1.247	0.486	0.976	0.754	1.169	0.263
							exm935365	rs144447314	-497.723	NA	MTL5	NS	2.976	0.043	0.000331345	3.62	0.026	0.000932	NA	NA	0	NA	NA	0	0.839	0.9	0.000384	NA	NA	0	0.991	0.866	0.953	0.724	1.024	0.843	1.262	0.412	0.998	0.972	0.931	0.621
							exm1733364	rs117897496	-230.155	NA	MRGPRD	NS	0.214	0.11	0.000596421	NA	NA	0	NA	NA	0	0.229	0.13	0.002237	NA	NA	0	NA	NA	0	0.981	0.859	0.981	0.859	1.065	0.816	1.065	0.816	0.977	0.842	0.977	0.842
							exm935493	rs144866081	-416.28	NA	CPT1A	NS	>999.999	0.13	0	NA	NA	0	NA	NA	0	NA	NA	0	>999.999	0.13	0	NA	NA	0	0.987	0.849	0.921	0.493	1.089	0.603	0.752	0.381	0.972	0.709	0.925	0.537
rs7931342	11	68994497	127	10	19	1	exm935900	rs145545074	-220.942	NA	MRGPRF	NS	2.003	0.0026	0.00238569	1.807	0.013	0.008388	NA	NA	0	NA	NA	0	>999.999	0.063	0	>999.999	0.17	0	1.05	0.0956	2.121	0.000302	1.116	0.114	1.245	0.717	1.042	0.189	2.133	0.000481
							exm936151	rs2220247	461.672	NA	CCND1	NS	>999.999	0.017	0	>999.999	0.039	0	>999.999	0.036	0	NA	NA	0	NA	NA	0	NA	NA	0	0.954	0.101	>999.999	0.0173	0.974	0.695		NA	0.953	0.115	>999.999	0.00865
							exm936070	rs147476406	-141.108	NA	TPCN2	NS	1.754	0.023	0.00231942	1.882	0.011	0.007689	NA	NA	0	NA	NA	0	<0.001	0.14	0.000768	NA	NA	0	1.034	0.204	1.23	0.0424	1.044	0.501	1.151	0.581	1.032	0.25	1.24	0.0463
							exm935718	rs149577588	-290.523	NA	IGHMBP2	NS	7.893	0.027	6.62691e-05	8.848	0.018	0.000233	NA	NA	0	NA	NA	0	NA	NA	0	NA	NA	0	0.986	0.717	0.934	0.358	1.162	0.134	1.353	0.0577	0.96	0.342	0.88	0.111
							exm936140	rs12274095	69.27	0.025	MYEOV	NS	1.174	0.027	0.0334351	1.152	0.35	0.03102	1.397	0.47	0.01861	1.299	0.63	0.00249	1.023	0.85	0.05188	1.279	0.031	0.06276	1.013	0.288	0.921	0.475	0.968	0.262	0.744	0.345	1.02	0.108	0.924	0.517
							exm935565	rs148535951	-330.429	0.001	MRPL21	NS	2.477	0.04	0.000530152	<0.001	0.22	0.000699	NA	NA	0	NA	NA	0	2.006	0.32	0.001152	6.937	0.0052	0.0005945	0.95	0.486	1.176	0.215	0.876	0.495	1.247	0.486	0.976	0.754	1.169	0.263
							exm935365	rs144447314	-513.64	NA	MTL5	NS	2.976	0.043	0.000331345	3.62	0.026	0.000932	NA	NA	0	NA	NA	0	0.839	0.9	0.000384	NA	NA	0	0.991	0.866	0.953	0.724	1.024	0.843	1.262	0.412	0.998	0.972	0.931	0.621
							exm1733364	rs117897496	-246.072	NA	MRGPRD	NS	0.214	0.11	0.000596421	NA	NA	0	NA	NA	0	0.229	0.13	0.002237	NA	NA	0	NA	NA	0	0.981	0.859	0.981	0.859	1.065	0.816	1.065	0.816	0.977	0.842	0.977	0.842
							exm935493	rs144866081	-432.197	NA	CPT1A	NS	>999.999	0.13	0	NA	NA	0	NA	NA	0	NA	NA	0	>999.999	0.13	0	NA	NA	0	0.987	0.849	0.921	0.493	1.089	0.603	0.752	0.381	0.972	0.709	0.925	0.537
							exm936196	rs56107468	495.504	NA	ORAOV1	NS	0.989	0.91	0.0196819	0.985	0.89	0.06431	4.814	0.34	0.001241	NA	NA	0	1.018	0.96	0.006144	0.298	0.29	0.001189	0.989	0.913		NA	0.917	0.751		NA	1.015	0.889		NA
rs10896449	11	68994667	127	10	19	1	exm935900	rs145545074	-221.112	NA	MRGPRF	NS	2.003	0.0026	0.00238569	1.807	0.013	0.008388	NA	NA	0	NA	NA	0	>999.999	0.063	0	>999.999	0.17	0	1.05	0.0956	2.121	0.000302	1.116	0.114	1.245	0.717	1.042	0.189	2.133	0.000481
							exm936151	rs2220247	461.502	NA	CCND1	NS	>999.999	0.017	0	>999.999	0.039	0	>999.999	0.036	0	NA	NA	0	NA	NA	0	NA	NA	0	0.954	0.101	>999.999	0.0173	0.974	0.695		NA	0.953	0.115	>999.999	0.00865
							exm936070	rs147476406	-141.278	NA	TPCN2	NS	1.754	0.023	0.00231942	1.882	0.011	0.007689	NA	NA	0	NA	NA	0	<0.001	0.14	0.000768	NA	NA	0	1.034	0.204	1.23	0.0424	1.044	0.501	1.151	0.581	1.032	0.25	1.24	0.0463
							exm935718	rs149577588	-290.693	NA	IGHMBP2	NS	7.893	0.027	6.62691e-05	8.848	0.018	0.000233	NA	NA	0	NA	NA	0	NA	NA	0	NA	NA	0	0.986	0.717	0.934	0.358	1.162	0.134	1.353	0.0577	0.96	0.342	0.88	0.111
							exm936140	rs12274095	69.1	0.026	MYEOV	NS	1.174	0.027	0.0334351	1.152	0.35	0.03102	1.397	0.47	0.01861	1.299	0.63	0.00249	1.023	0.85	0.05188	1.279	0.031	0.06276	1.013	0.288	0.921	0.475	0.968	0.262	0.744	0.345	1.02	0.108	0.924	0.517
							exm935565	rs148535951	-330.599	0.001	MRPL21	NS	2.477	0.04	0.000530152	<0.001	0.22	0.000699	NA	NA	0	NA	NA	0	2.006	0.32	0.001152	6.937	0.0052	0.0005945	0.95	0.486	1.176	0.215	0.876	0.495	1.247	0.486	0.976	0.754	1.169	0.263
							exm935365	rs144447314	-513.81	NA	MTL5	NS	2.976	0.043	0.000331345	3.62	0.026	0.000932	NA	NA	0	NA	NA	0	0.839	0.9	0.000384	NA	NA	0	0.991	0.866	0.953	0.724	1.024	0.843	1.262	0.412	0.998	0.972	0.931	0.621
							exm1733364	rs117897496	-246.242	NA	MRGPRD	NS	0.214	0.11	0.000596421	NA	NA	0	NA	NA	0	0.229	0.13	0.002237	NA	NA	0	NA	NA	0	0.981	0.859	0.981	0.859	1.065	0.816	1.065	0.816	0.977	0.842	0.977	0.842
							exm935493	rs144866081	-432.367	NA	CPT1A	NS	>999.999	0.13	0	NA	NA	0	NA	NA	0	NA	NA	0	>999.999	0.13	0	NA	NA	0	0.987	0.849	0.921	0.493	1.089	0.603	0.752	0.381	0.972	0.709	0.925	0.537
							exm936196	rs56107468	495.334	NA	ORAOV1	NS	0.989	0.91	0.0196819	0.985	0.89	0.06431	4.814	0.34	0.001241	NA	NA	0	1.018	0.96	0.006144	0.298	0.29	0.001189	0.989	0.913		NA	0.917	0.751		NA	1.015	0.889		NA
rs11568818	11	102401661	172	14	28	2	exm951034	rs61730847	94.298	0.014	MMP20	NS	0.471	0.0039	0.00410868	0.738	0.65	0.00233	2.028	0.62	0.001241	NA	NA	0	0.62	0.25	0.006144	0.321	0.0073	0.0104	0.999	0.942	1.022	0.796	0.932	0.0673	1.109	0.592	1.004	0.808	0.994	0.949
							exm951151	rs138686754	183.627	NA	MMP8	SP	3.589	0.0088	0.000397614	2.314	0.39	0.000466	NA	NA	0	NA	NA	0	0.869	0.89	0.000768	7.181	0.0044	0.0005945	1.003	0.82	1.067	0.38	1.001	0.966	1.308	0.111	1.002	0.893	1.048	0.548
							exm950869	rs12288849	-129.261	NA	TMEM123	NS	0.566	0.032	0.00384361	0.591	0.048	0.01328	NA	NA	0	NA	NA	0	<0.001	0.29	0.000384	NA	NA	0	1.018	0.678	1.071	0.604	1.175	0.0985	1.265	0.438	0.982	0.697	1.058	0.69
							exm951353	rs59142365	260.479	NA	MMP1	NS	0.497	0.04	0.00258449	0.481	0.037	0.008854	NA	NA	0	NA	NA	0	0.719	0.82	0.000384	NA	NA	0	0.777	0.0117	0.754	0.0329	1.014	0.951	0.724	0.351	0.709	0.00168	0.723	0.0231
							exm951046	rs61995943	160.963	NA	MMP27	ST	0.609	0.05	0.00424122	0.554	0.024	0.01491	NA	NA	0	NA	NA	0	>999.999	0.11	0	NA	NA	0	1.019	0.14	0.934	0.441	0.999	0.985	0.849	0.468	1.019	0.165	0.923	0.398
							exm950660	rs181449558	-447.845	0.001	C11orf70	NS	>999.999	0.061	0	NA	NA	0	NA	NA	0	NA	NA	0	NA	NA	0	>999.999	0.055	0	0.925	0.916	0.925	0.916	<0.001	0.555	<0.001	0.555	1.087	0.91	1.087	0.91
							exm1692408	rs143174783	311.899	NA	MMP3	ST	>999.999	0.061	0	>999.999	0.11	0	NA	NA	0	NA	NA	0	>999.999	0.28	0	NA	NA	0	1.013	0.646	0.937	0.713	0.961	0.556	0.457	0.175	1.025	0.403	0.999	0.998
							exm950688	rs61746398	-325.008	NA	YAP1	NS	0.4	0.069	0.000994036	2.327	0.54	0.000233	NA	NA	0	NA	NA	0	0.242	0.018	0.004992	1.868	0.66	0.0002973	0.859	0.384	0.859	0.384	1.053	0.897	1.053	0.897	0.87	0.454	0.87	0.454
							exm951527	rs652438	334.981	0.011	MMP12	NS	0.92	0.091	0.0927767	0.93	0.3	0.1729	0.607	0.026	0.1464	0.94	0.64	0.04672	0.953	0.72	0.04916	0.946	0.65	0.06659	0.942	0.122	0.97	0.822	1.085	0.371	0.889	0.738	0.919	0.0404	0.981	0.891
							exm951573	rs190896822	414.815	0.001	MMP13	NS	<0.001	0.13	0.000265111	<0.001	0.44	0.000233	NA	NA	0	NA	NA	0	<0.001	0.24	0.000384	<0.001	0.33	0.0005945	1.024	0.842	1.024	0.842	1.223	0.435	1.223	0.435	1.035	0.78	1.035	0.78
							exm950928	rs17884789	-3.332	0.002	MMP7	NS	0.892	0.17	0.0339547	2.294	0.39	0.0004669	0.944	0.85	0.05707	0.898	0.23	0.1137	<0.001	0.13	0.001154	0.339	0.31	0.001498	0.962	0.249	0.996	0.965	0.92	0.298	1.231	0.362	0.957	0.206	0.976	0.826
							exm950778	rs138752976	-194.796	NA	BIRC3	NS	<0.001	0.22	0.000198834	<0.001	0.33	0.000466	NA	NA	0	NA	NA	0	NA	NA	0	<0.001	0.46	0.0002973	0.924	0.314	0.75	0.355	0.61	0.0216	0.922	0.912	0.973	0.735	0.775	0.437
							exm951266	rs139185475	245.396	NA	MMP10	NS	2.926	0.22	0.000132538	>999.999	0.06	0	NA	NA	0	0.953	0.97	0.000497	NA	NA	0	NA	NA	0	1.016	0.622	0.879	0.27	1.048	0.532	1.077	0.785	1.027	0.426	0.897	0.378
							exm950795	rs143071976	-180.972	NA	BIRC2	NS	2.615	0.28	0.000132538	2.67	0.27	0.000466	NA	NA	0	NA	NA	0	NA	NA	0	NA	NA	0	0.925	0.709	0.925	0.709	0.732	0.596	0.732	0.596	0.911	0.673	0.911	0.673
rs10875943	12	49676010	218	25	32	4	exm1000922	rs78475684	316.682	NA	FAM186B	NS	1.256	0.038	0.0145129	1.224	0.079	0.048	NA	NA	0	NA	NA	0	1.062	0.89	0.004224	5.198	0.032	0.0005945	1	0.994	0.964	0.604	0.988	0.864	0.946	0.75	1.009	0.76	0.963	0.607
							exm999426	rs1126930	-276.878	0.03	PRKAG1	NS	1.294	0.042	0.010008	1.046	0.89	0.00676	0.642	0.58	0.01117	NA	NA	0	1.436	0.18	0.009217	1.374	0.054	0.02646	1.29	0.0333	1.246	0.542	1.341	0.283	1.725	0.461	1.291	0.0424	1.267	0.534
							exm1000786	rs148051821	274.21	0.003	KCNH3	NS	0.239	0.043	0.000861612	>999.999	0.25	0	<0.001	0.43	0.001241	NA	NA	0	<0.001	0.052	0.001536	0.239	0.14	0.002378	1.018	0.736	0.751	0.189	1.063	0.629	0.228	0.11	1.012	0.83	0.75	0.214
							exm1000437	rs140223921	43.574	NA	TROAP	NS	0.507	0.045	0.00265076	0.496	0.046	0.008854	NA	NA	0	NA	NA	0	0.561	0.63	0.000768	NA	NA	0	0.938	0.429	0.851	0.224	0.773	0.23	0.514	0.106	0.975	0.769	0.917	0.528
							exm999397	rs142718707	-283.13	NA	DDN	NS	0.485	0.049	0.00231942	0.49	0.051	0.008155	NA	NA	0	NA	NA	0	NA	NA	0	NA	NA	0	0.991	0.752	0.817	0.442	0.942	0.379	0.384	0.324	1.007	0.812	0.928	0.78
							exm1774944	rs146176618	212.653	NA	SPATS2	NS	2.078	0.051	0.000927767	NA	NA	0	2.929	0.38	0.001241	1.959	0.094	0.003231	NA	NA	0	NA	NA	0	1.047	0.621	0.967	0.813	0.768	0.313	0.422	0.0808	1.069	0.495	1.039	0.795
							exm999459	NA	-255.955	NA	MLL2	NS	>999.999	0.062	0	NA	NA	0	>999.999	0.1	0	NA	NA	0	>999.999	0.34	0	NA	NA	0	0.986	0.696	0.997	0.964	0.926	0.383	0.853	0.35	0.999	0.976	1.017	0.804
							exm1001365	rs144057087	476.182	NA	TMBIM6	NS	>999.999	0.066	0	>999.999	0.08	0	NA	NA	0	NA	NA	0	>999.999	0.24	0	NA	NA	0	1.038	0.818	1.038	0.818	0.74	0.511	0.74	0.511	1.069	0.693	1.069	0.693
							exm1000608	rs142137387	69.108	NA	DNAJC22	NS	0.301	0.097	0.000795229	0.307	0.1	0.002796	NA	NA	0	NA	NA	0	NA	NA	0	NA	NA	0	0.858	0.244	0.858	0.244	0.744	0.389	0.744	0.389	0.902	0.45	0.902	0.45
							exm999131	rs140228766	-365.179	NA	CCDC65	NS	0.413	0.099	0.00125911	0.291	0.035	0.004427	NA	NA	0	NA	NA	0	NA	NA	0	>999.999	0.13	0	0.981	0.186	0.912	0.439	1.019	0.583	0.809	0.499	0.975	0.0986	0.939	0.618
							exm999332	rs148154047	-300.693	NA	WNT1	NS	0.638	0.11	0.00331389	0.686	0.18	0.01095	NA	NA	0	NA	NA	0	<0.001	0.14	0.001153	NA	NA	0	0.804	0.257	0.804	0.257	0.931	0.877	0.931	0.877	0.819	0.329	0.819	0.329
							exm998923	rs141786339	-457.879	NA	CACNB3	NS	>999.999	0.13	0	NA	NA	0	NA	NA	0	NA	NA	0	NA	NA	0	>999.999	0.16	0	1.312	0.0706	1.312	0.0706	1.888	0.0384	1.888	0.0384	1.256	0.154	1.256	0.154
							exm1001074	rs183616314	350.653	NA	PRPF40B	SP	>999.999	0.13	0	NA	NA	0	NA	NA	0	NA	NA	0	NA	NA	0	>999.999	0.12	0	1.102	0.625	1.102	0.625	1.533	0.31	1.533	0.31	1.112	0.613	1.112	0.613
							exm2220579	NA	13.325	NA	PRPH	NS	3.474	0.15	0.000132538	NA	NA	0	<0.001	0.34	0.002481	>999.999	0.11	0	>999.999	0.23	0	>999.999	0.12	0	1.034	0.653	1.193	0.586	0.936	0.714	1.312	0.713	1.068	0.391	1.242	0.521
							exm999279	rs140227583	-314.085	NA	WNT10B	NS	>999.999	0.19	0	NA	NA	0	NA	NA	0	NA	NA	0	NA	NA	0	>999.999	0.19	0	0.926	0.62	0.926	0.62	0.379	0.0839	0.379	0.0839	1.03	0.854	1.03	0.854
							exm998789	rs3730071	-507.212	NA	ADCY6	NS	1.206	0.18	0.00888005	1.463	0.26	0.005126	0.448	0.48	0.004963	NA	NA	0	1.066	0.83	0.009601	1.243	0.23	0.02467	1.007	0.924	1.089	0.421	0.974	0.877	0.903	0.709	1.018	0.804	1.099	0.397
							exm1000886	rs148437866	284.205	NA	MCRS1	NS	4.044	0.22	6.62691e-05	3.974	0.22	0.000233	NA	NA	0	NA	NA	0	NA	NA	0	NA	NA	0	1.009	0.975	1.009	0.975	2.19	0.138	2.19	0.138	0.866	0.664	0.866	0.664
							exm1774383	rs145288407	-420.181	NA	RND1	NS	0.31	0.26	0.000331345	<0.001	0.45	0.000233	NA	NA	0	NA	NA	0	<0.001	0.4	0.000384	0.621	0.68	0.0008918	0.67	0.138	0.67	0.138	0.956	0.94	0.956	0.94	0.673	0.167	0.673	0.167
							exm1001254	rs149056505	368.482	NA	FMNL3	NS	1.924	0.31	0.000331345	1.699	0.49	0.000932	NA	NA	0	NA	NA	0	1.5	0.74	0.000384	NA	NA	0	0.958	0.737	0.958	0.737	0.658	0.245	0.658	0.245	0.998	0.986	0.998	0.986
							exm1000113	NA	-187.941	NA	DHH	NS	1.649	0.41	0.000397614	1.648	0.41	0.001398	NA	NA	0	NA	NA	0	NA	NA	0	NA	NA	0	1.649	0.407	1.649	0.407	<0.001	0.567	<0.001	0.567	1.976	0.255	1.976	0.255
							exm1000169	rs35343771	-177.726	0	LMBR1L	NS	0.833	0.44	0.00331345	1.371	0.68	0.000932	<0.001	0.44	0.002481	0.858	0.9	0.000497	1.052	0.9	0.004992	0.684	0.29	0.008621	0.878	0.525	0.878	0.525	1.229	0.624	1.229	0.624	0.859	0.486	0.859	0.486
							exm999027	rs141431927	-445.447	NA	DDX23	NS	1.789	0.56	0.000132538	>999.999	0.21	0	NA	NA	0	<0.001	0.41	0.0002485	<0.001	0.47	0.000384	>999.999	0.15	0	1.789	0.557	1.789	0.557	<0.001	0.698	<0.001	0.698	2.121	0.444	2.121	0.444
							exm999207	rs139881670	-357.619	NA	FKBP11	NS	0.551	0.62	0.000132538	NA	NA	0	NA	NA	0	NA	NA	0	1.057	0.97	0.000384	<0.001	0.42	0.0002973	0.788	0.738	0.788	0.738	<0.001	0.538	<0.001	0.538	0.937	0.927	0.937	0.927
							exm1000543	rs144219849	50.841	NA	C1QL4	NS	1.132	0.88	0.000198886	NA	NA	0	NA	NA	0	NA	NA	0	1.496	0.66	0.000768	<0.001	0.47	0.0002973	1.132	0.88	1.132	0.88	<0.001	0.607	<0.001	0.607	1.362	0.706	1.362	0.706
							exm1000068	rs61751607	-215.56	NA	RHEBL1	NS	1.003	0.99	0.000927767	0.841	0.72	0.003262	NA	NA	0	NA	NA	0	NA	NA	0	>999.999	0.17	0	1.003	0.993	1.003	0.993	<0.001	0.389	<0.001	0.389	1.204	0.691	1.204	0.691
rs902774	12	53273904	472	33	78	4	exm1005051	rs148227046	-449.479	NA	KRT75	NS	2.563	0.0045	0.000994036	2.624	0.0049	0.003262	NA	NA	0	NA	NA	0	0.87	0.92	0.000384	>999.999	0.13	0	0.98	0.4	1.065	0.39	0.984	0.775	1.034	0.858	0.979	0.392	1.121	0.137
							exm1005630	rs2292506	-335.584	0.015	KRT71	NS	0.9	0.0054	0.165142	0.922	0.21	0.2057	0.688	0.054	0.1898	0.879	0.068	0.1996	0.923	0.31	0.1667	0.948	0.66	0.0651	1	0.993	1.011	0.875	0.996	0.921	1.049	0.786	1.001	0.943	1.008	0.912
							exm1006887	rs140032117	-48.665	NA	KRT79	NS	2.743	0.0072	0.00072896	2.266	0.052	0.00233	NA	NA	0	NA	NA	0	6.24	0.065	0.000384	>999.999	0.17	0	1.012	0.733	1.002	0.977	0.947	0.531	0.708	0.0874	1.023	0.538	1.047	0.517
							exm1006173	rs144222539	-229.748	NA	KRT2	NS	5.856	0.014	0.000132538	<0.001	0.55	0.000233	NA	NA	0	NA	NA	0	>999.999	0.069	0	7.671	0.032	0.0002973	0.997	0.903	0.82	0.0269	0.961	0.556	0.904	0.632	1.001	0.967	0.809	0.0269
							exm1008458	rs142953883	426.949	0.002	C12orf10	NS	1.961	0.015	0.00159046	0.695	0.65	0.001631	NA	NA	0	NA	NA	0	2.384	0.072	0.002304	2.306	0.037	0.00327	0.998	0.945	1.13	0.364	1.124	0.0461	1.665	0.061	0.989	0.685	1.054	0.719
							exm1007505	NA	180.859	NA	TENC1	NS	>999.999	0.019	0	>999.999	0.17	0	NA	NA	0	NA	NA	0	NA	NA	0	>999.999	0.048	0	0.968	0.486	1.012	0.907	0.991	0.939	1.029	0.907	0.96	0.413	0.999	0.99
							exm1005753	rs148173615	-312.987	0	KRT74	NS	0.434	0.024	0.00232126	0.419	0.11	0.004196	<0.001	0.65	0.001241	NA	NA	0	0.747	0.65	0.00269	0.216	0.11	0.002675	1.033	0.239	0.981	0.833	0.945	0.396	0.797	0.345	1.045	0.132	1.037	0.697
							exm1004918	NA	-480.098	NA	KRT82	NS	>999.999	0.031	0	>999.999	0.099	0	NA	NA	0	NA	NA	0	NA	NA	0	>999.999	0.17	0	0.995	0.87	0.913	0.242	1.028	0.686	0.863	0.458	0.99	0.737	0.947	0.502
							exm1007068	rs114041054	-31.209	NA	KRT78	NS	0.725	0.036	0.0101392	0.741	0.06	0.03332	4.726	0.27	0.001241	NA	NA	0	0.533	0.3	0.003072	<0.001	0.3	0.0002973	0.991	0.571	0.936	0.449	0.989	0.777	1.087	0.677	0.994	0.703	0.919	0.361
							exm1007699	rs148425254	236.044	NA	SOAT2	NS	>999.999	0.037	0	>999.999	0.09	0	NA	NA	0	NA	NA	0	NA	NA	0	>999.999	0.17	0	0.986	0.509	1.267	0.143	1.069	0.181	1.852	0.0427	0.982	0.425	1.217	0.258
							exm2220742	rs7487904	351.05	0	RARG	SP	0.932	0.039	0.253778	0.875	0.012	0.4678	0.773	0.1	0.3089	0.94	0.35	0.2217	1.016	0.85	0.1367	1.087	0.4	0.09661	0.943	0.0338	1.641	0.189	0.94	0.365	<0.001	0.341	0.943	0.0447	1.94	0.0772
							exm1008111	NA	373.808	NA	MFSD5	NS	>999.999	0.044	0	>999.999	0.13	0	NA	NA	0	NA	NA	0	>999.999	0.13	0	NA	NA	0	1.052	0.892	1.052	0.892	1.682	0.486	1.682	0.486	1.066	0.874	1.066	0.874
							exm1004836	rs79539700	-494.896	0.001	KRT84	NS	1.583	0.051	0.00225315	2.664	0.32	0.000466	<0.001	0.45	0.002481	<0.001	0.34	0.0002485	2.126	0.019	0.00576	1.194	0.67	0.004162	1	0.983	1.037	0.702	1.026	0.484	1.285	0.209	0.995	0.756	1.009	0.93
							exm1005452	NA	-388.588	NA	KRT6A	NS	1.091	0.055	0.197292	1.024	0.95	0.004433	1.134	0.5	0.1824	1.08	0.17	0.6222	1.126	0.2	0.1082	1.135	0.72	0.008918	1.063	0.159	0.888	0.468	0.95	0.625	1.189	0.646	1.082	0.0876	0.86	0.392
							exm1008302	rs143177748	408.203	NA	ESPL1	NS	0.437	0.063	0.001723	0.381	0.041	0.006058	NA	NA	0	NA	NA	0	>999.999	0.41	0	NA	NA	0	1.015	0.325	0.92	0.135	1.123	0.000772	1.21	0.103	1.006	0.695	0.888	0.0483
							exm1776875	rs146851850	-278.806	NA	KRT72	NS	0.762	0.08	0.0101513	<0.001	0.52	0.0002331	2.763	0.17	0.004988	0.726	0.051	0.03611	NA	NA	0	1.28	0.79	0.0008929	0.992	0.507	0.858	0.133	1.025	0.37	0.822	0.45	0.99	0.417	0.867	0.187
							exm1006401	rs146379141	-185.429	NA	KRT77	NS	0.194	0.082	0.000662691	0.19	0.077	0.00233	NA	NA	0	NA	NA	0	NA	NA	0	NA	NA	0	0.955	0.0855	0.948	0.638	0.873	0.0345	0.8	0.46	0.971	0.304	0.969	0.791
							exm1007918	rs149573967	312.781	NA	ITGB7	NS	>999.999	0.093	0	>999.999	0.15	0	NA	NA	0	NA	NA	0	>999.999	0.5	0	NA	NA	0	1.125	0.263	1.125	0.263	1.049	0.847	1.049	0.847	1.133	0.262	1.133	0.262
							exm1008485	rs140950308	428.177	NA	AAAS	NS	>999.999	0.098	0	>999.999	0.1	0	NA	NA	0	NA	NA	0	NA	NA	0	NA	NA	0	1.053	0.705	1.053	0.705	1.668	0.0578	1.668	0.0578	0.982	0.904	0.982	0.904
							exm1006330	rs116444444	-199.964	NA	KRT1	NS	0.374	0.11	0.0010603	0.418	0.16	0.003262	NA	NA	0	NA	NA	0	NA	NA	0	<0.001	0.34	0.0005945	0.987	0.693	0.897	0.687	0.944	0.454	0.685	0.602	1.001	0.967	0.976	0.931
							exm1006773	NA	-68.228	NA	KRT4	NS	<0.001	0.11	0.000265076	<0.001	0.49	0.000233	NA	NA	0	NA	NA	0	<0.001	0.29	0.000384	<0.001	0.31	0.0005945	1.007	0.714	0.826	0.363	0.955	0.335	0.399	0.187	1.019	0.365	0.907	0.65
							exm1006553	rs149868801	-106.488	0.045	KRT76	ST	1.378	0.14	0.00318091	1.974	0.26	0.001398	4.733	0.13	0.002481	NA	NA	0	1.938	0.17	0.002688	1.094	0.75	0.00981	1.012	0.461	1.071	0.54	1.025	0.526	0.79	0.449	1.011	0.508	1.083	0.502
							exm1006085	rs143333287	-261.875	NA	KRT73	NS	<0.001	0.15	0.000198834	NA	NA	0	NA	NA	0	<0.001	0.24	0.0004973	NA	NA	0	<0.001	0.44	0.0002973	1.014	0.678	1.073	0.462	1.01	0.904	1.221	0.37	1.013	0.706	1.028	0.786
							exm1007794	NA	280.644	NA	CSAD	SP	<0.001	0.16	0.000132538	NA	NA	0	NA	NA	0	NA	NA	0	<0.001	0.21	0.000384	<0.001	0.46	0.0002973	0.997	0.985	0.997	0.985	1.607	0.124	1.607	0.124	0.943	0.738	0.943	0.738
							exm1007855	rs183395364	305.274	NA	ZNF740	NS	1.644	0.16	0.00119284	1.585	0.19	0.004194	NA	NA	0	NA	NA	0	NA	NA	0	NA	NA	0	1.446	0.0689	1.446	0.0689	0.539	0.385	0.539	0.385	1.59	0.0256	1.59	0.0256
							exm1006653	NA	-86.919	NA	KRT3	NS	>999.999	0.19	0	>999.999	0.18	0	NA	NA	0	NA	NA	0	NA	NA	0	NA	NA	0	1.025	0.301	0.89	0.444	0.97	0.599	0.58	0.233	1.026	0.309	0.828	0.251
							exm1005604	rs61747188	-360.082	NA	KRT5	NS	1.145	0.22	0.0154407	1.156	0.2	0.05242	NA	NA	0	NA	NA	0	0.639	0.44	0.003072	>999.999	0.13	0	1.016	0.43	0.948	0.797	1.029	0.559	1.268	0.614	1.016	0.48	0.958	0.848
							exm1008382	NA	417.766	NA	PFDN5	NS	2.504	0.28	0.000132538	>999.999	0.15	0	NA	NA	0	NA	NA	0	1.175	0.87	0.000768	>999.999	0.2	0	0.903	0.744	0.903	0.744	2.077	0.166	2.077	0.166	0.797	0.508	0.797	0.508
							exm1007304	rs8916	159.582	0	EIF4B	SP	0.962	0.31	0.204506	1.015	0.78	0.4452	0.638	0.06	0.1104	0.897	0.15	0.1628	1.176	0.16	0.06144	0.733	0.0088	0.08056	0.962	0.304	0.665	0.637	0.962	0.682	<0.001	0.536	0.966	0.388	0.785	0.781
							exm1007612	rs112479506	217.607	NA	IGFBP6	NS	<0.001	0.46	6.63042e-05	<0.001	0.5	0.000233	NA	NA	0	NA	NA	0	NA	NA	0	NA	NA	0	1.016	0.919	1.016	0.919	0.849	0.701	0.849	0.701	1.051	0.77	1.051	0.77
							exm1005337	rs185887786	-408.387	NA	KRT6C	SP	<0.001	0.51	6.62778e-05	NA	NA	0	NA	NA	0	NA	NA	0	NA	NA	0	<0.001	0.48	0.0002973	<0.001	0.513	<0.001	0.513	<0.001	0.814	<0.001	0.814	<0.001	0.545	<0.001	0.545
							exm1005117	rs143946299	-432.829	NA	KRT6B	NS	2.037	0.61	6.62691e-05	1.968	0.63	0.000233	NA	NA	0	NA	NA	0	NA	NA	0	NA	NA	0	2.036	0.61	2.036	0.61	<0.001	0.825	<0.001	0.825	2.413	0.524	2.413	0.524
							exm1008614	rs188929035	449.254	NA	SP7	NS	1.216	0.7	0.00072896	NA	NA	0	<0.001	0.5	0.001241	1.175	0.77	0.002485	NA	NA	0	>999.999	0.13	0	1.069	0.77	1.069	0.77	1.285	0.633	1.285	0.633	1.063	0.801	1.063	0.801
rs10778826	12	82102854	9	2	1	1	exm1024329	rs56241008	-441.032	NA	PPFIA2	NS	0.84	0.15	0.0151756	0.843	0.17	0.05079	<0.001	0.65	0.001241	NA	NA	0	1.153	0.79	0.002688	<0.001	0.22	0.0008918	0.868	0.173	0.954	0.815	0.716	0.245	0.838	0.73	0.867	0.197	0.987	0.951
							exm1024239	rs61745251	-574.229	NA	ACSS3	NS	0.94	0.25	0.0785288	1.025	0.75	0.1358	1.464	0.38	0.01861	0.885	0.16	0.1218	0.945	0.78	0.02074	0.255	0.00087	0.01278	0.952	0.348	1.28	0.338	0.814	0.14	0.874	0.854	0.97	0.586	1.407	0.195
rs1270884	12	114685571	45	3	0	0	exm1040433	rs138369177	-289.893	NA	RBM19	NS	0.246	0.047	0.000861612	0.314	0.11	0.002564	NA	NA	0	NA	NA	0	<0.001	0.17	0.000768	NA	NA	0	1.005	0.606	1.087	0.511	1.023	0.293	0.846	0.624	1	0.978	1.082	0.559
							exm1040611	rs78115331	426.983	0.001	TBX3	NS	0.842	0.049	0.0294897	0.869	0.12	0.09623	<0.001	0.4	0.002481	NA	NA	0	0.732	0.36	0.008449	0.44	0.33	0.002378	0.894	0.134	1.042	0.748	1.036	0.844	1.472	0.122	0.873	0.0906	1.009	0.95
							exm1040569	NA	156.078	NA	TBX5	NS	0.346	0.15	0.000729056	0.415	0.25	0.002097	NA	NA	0	NA	NA	0	<0.001	0.42	0.000384	<0.001	0.47	0.0002974	1.078	0.463	1.078	0.463	0.563	0.0736	0.563	0.0736	1.137	0.224	1.137	0.224
rs9600079	13	73728139	62	5	7	1	exm1071965	rs35288597	-381.234	0.002	DIS3	NS	0.623	0.0064	0.00808482	0.678	0.38	0.00466	<0.001	0.011	0.01241	NA	NA	0	0.563	0.073	0.01152	0.741	0.21	0.01843	1.034	0.273	0.957	0.561	0.96	0.576	0.722	0.114	1.041	0.214	0.972	0.725
							exm1072078	rs61999297	-326.902	0.002	PIBF1	NS	0.621	0.0067	0.00795229	0.722	0.46	0.004427	<0.001	0.011	0.01241	NA	NA	0	0.541	0.062	0.01114	0.74	0.21	0.01843	1.01	0.696	0.913	0.219	0.986	0.827	0.749	0.155	1.014	0.622	0.94	0.426
							exm1071798	rs138140778	-434.934	NA	MZT1	NS	>999.999	0.17	0	NA	NA	0	NA	NA	0	NA	NA	0	NA	NA	0	>999.999	0.16	0	>999.999	0.174	>999.999	0.174		NA		NA	>999.999	0.14	>999.999	0.14
							exm1071840	rs182782800	-409	0.001	C13orf34	NS	0.55	0.2	0.00132538	0.338	0.29	0.001398	<0.001	0.53	0.002481	<0.001	0.51	0.0002485	0.792	0.8	0.001152	0.751	0.67	0.002378	0.875	0.274	0.875	0.274	0.846	0.577	0.846	0.577	0.858	0.24	0.858	0.24
							exm1072168	rs150794367	-91.558	NA	KLF5	NS	0.421	0.27	0.000463883	<0.001	0.32	0.000466	NA	NA	0	NA	NA	0	1.046	0.96	0.000768	<0.001	0.2	0.0008918	1.029	0.842	1.029	0.842	1.319	0.382	1.319	0.382	0.996	0.981	0.996	0.981
rs8008270	14	53372330	60	8	7	1	exm1102430	rs146006539	246.754	NA	DDHD1	NS	0.281	0.03	0.00132591	0.282	0.03	0.004662	NA	NA	0	NA	NA	0	NA	NA	0	NA	NA	0	0.635	0.0336	0.635	0.0336	0.404	0.192	0.404	0.192	0.704	0.112	0.704	0.112
							exm1102050	rs141268117	-390.683	0.024	TXNDC16	NS	2.331	0.053	0.000596421	0.684	0.74	0.000699	<0.001	0.51	0.001241	NA	NA	0	3.834	0.2	0.000384	3.373	0.04	0.001189	0.993	0.772	1.196	0.146	1.026	0.665	0.937	0.841	0.989	0.676	1.21	0.141
							exm1102319	rs146421425	-24.329	NA	FERMT2	NS	<0.001	0.091	0.000397614	<0.001	0.46	0.000233	NA	NA	0	NA	NA	0	<0.001	0.5	0.000384	<0.001	0.17	0.001189	0.801	0.366	0.801	0.366	1.17	0.759	1.17	0.759	0.786	0.358	0.786	0.358
							exm1102106	rs61995759	-305.371	NA	GPR137C	NS	1.888	0.16	0.000662691	1.851	0.18	0.00233	NA	NA	0	NA	NA	0	NA	NA	0	NA	NA	0	1.013	0.649	1.788	0.0822	0.885	0.0715	<0.001	0.3	1.029	0.335	2.085	0.0291
							exm1102245	rs147738274	-136.679	NA	STYX	SP	4.283	0.2	6.62691e-05	NA	NA	0	NA	NA	0	NA	NA	0	NA	NA	0	4.077	0.21	0.0002973	1.507	0.543	1.507	0.543	<0.001	0.559	<0.001	0.559	1.803	0.379	1.803	0.379
							exm1102187	rs140545868	-198.41	NA	PSMC6	ST	0.633	0.21	0.0019218	0.649	0.24	0.006524	NA	NA	0	NA	NA	0	<0.001	0.27	0.000384	NA	NA	0	0.628	0.187	0.628	0.187	0.512	0.504	0.512	0.504	0.618	0.205	0.618	0.205
							exm2274688	rs192453247	-127.248	NA	GNPNAT1	NS	2.563	0.24	0.000198807	NA	NA	0	<0.001	0.68	0.001241	3.997	0.11	0.000497	NA	NA	0	NA	NA	0	2.563	0.238	2.563	0.238	6.298	0.0694	6.298	0.0694	1.943	0.464	1.943	0.464
							exm1102152	rs62639686	-247.463	NA	ERO1L	SP	0.746	0.34	0.00245228	0.801	0.48	0.008159	NA	NA	0	NA	NA	0	<0.001	0.27	0.000384	<0.001	0.42	0.0002973	0.919	0.7	0.919	0.7	0.272	0.165	0.272	0.165	0.992	0.971	0.992	0.971
rs7141529	14	69126744	16	3	0	0	exm1110367	rs35162541	130.375	NA	ZFP36L1	NS	1.839	0.037	0.00159046	1.996	0.1	0.002563	<0.001	0.6	0.001241	2.341	0.045	0.002485	<0.001	0.082	0.000768	NA	NA	0	1.839	0.037	1.839	0.037	2.079	0.227	2.079	0.227	1.819	0.052	1.819	0.052
							exm1110541	NA	393.999	NA	DCAF5	NS	>999.999	0.1	0	NA	NA	0	NA	NA	0	NA	NA	0	NA	NA	0	>999.999	0.13	0	0.756	0.109	0.756	0.109	0.762	0.542	0.762	0.542	0.779	0.176	0.779	0.176
							exm1110501	rs145918825	249.305	NA	ACTN1	NS	3.174	0.32	6.62691e-05	NA	NA	0	NA	NA	0	NA	NA	0	NA	NA	0	3.444	0.29	0.0002973	1.058	0.686	1.058	0.686	1.129	0.693	1.129	0.693	1.065	0.666	1.065	0.666
rs684232	17	618965	87	11	60	5	exm1273474	rs3744741	30.267	0.294	GEMIN4	NS	1.099	0.0035	0.230815	1.141	0.021	0.2996	1.173	0.26	0.3337	1.056	0.42	0.1988	1.125	0.073	0.2565	1.012	0.89	0.1367	1.018	0.236	0.999	0.99	1.015	0.686	0.953	0.779	1.017	0.294	1	0.999
							exm1273677	rs2273454	66.675	0.359	RNMTL1	NS	1.075	0.024	0.240888	1.22	0.013	0.1137	1.194	0.18	0.4082	1.01	0.87	0.3387	1.123	0.064	0.2922	0.979	0.78	0.2063	1.046	0.113	0.962	0.876	0.957	0.513	0.651	0.545	1.048	0.119	0.919	0.752
							exm1273789	NA	103.809	NA	NXN	NS	<0.001	0.03	0.000463883	NA	NA	0	<0.001	0.65	0.001241	NA	NA	0	<0.001	0.12	0.001152	<0.001	0.19	0.0008918	<0.001	0.0114	<0.001	0.0114	<0.001	0.381	<0.001	0.381	<0.001	0.0199	<0.001	0.0199
							exm1273983	NA	409.581	NA	ABR	NS	>999.999	0.12	0	>999.999	0.14	0	NA	NA	0	NA	NA	0	NA	NA	0	NA	NA	0	0.921	0.157	0.777	0.215	1.078	0.564	1.633	0.172	0.895	0.0759	0.685	0.0937
							exm1273311	rs79657649	-113.86	0.012	VPS53	NS	0.785	0.13	0.00908368	0.397	0.38	0.001167	1.608	0.43	0.009926	0.769	0.15	0.02758	1.217	0.89	0.000384	0.648	0.45	0.003567	1.006	0.855	0.819	0.107	0.997	0.968	0.944	0.844	1.012	0.714	0.813	0.115
							exm1273241	NA	-323.316	NA	FAM101B	NS	0.254	0.17	0.000463883	0.256	0.17	0.001631	NA	NA	0	NA	NA	0	NA	NA	0	NA	NA	0	1.028	0.469	1.059	0.697	1.172	0.0586	1.943	0.0222	1.022	0.591	0.981	0.903
							exm1273101	rs4581766	-358.666	0.004	C17orf97	NS	1.042	0.24	0.181451	1.006	0.92	0.2569	1.192	0.37	0.1278	0.944	0.4	0.1945	1.15	0.071	0.1517	1.143	0.15	0.1055	1.045	0.217	2.465	0.169	1.087	0.326	4.173	0.168	1.055	0.154	2.351	0.218
							exm1273624	rs116072465	54.365	NA	GLOD4	NS	1.824	0.26	0.000463883	3.881	0.24	0.000233	NA	NA	0	NA	NA	0	>999.999	0.12	0	0.945	0.94	0.001784	1.224	0.42	1.224	0.42	1.297	0.666	1.297	0.666	1.183	0.529	1.183	0.529
							exm1273007	rs117190076	-555.282	NA	RPH3AL	NS	1.109	0.22	0.0257192	1.54	0.026	0.01493	1.343	0.56	0.01613	<0.001	0.056	0.001243	1.089	0.59	0.03379	1.004	0.98	0.0648	0.997	0.947	1.015	0.932	0.98	0.84	1.667	0.117	0.985	0.74	0.902	0.579
							exm1273844	rs148113882	283.242	NA	TIMM22	NS	<0.001	0.4	6.62691e-05	NA	NA	0	NA	NA	0	NA	NA	0	<0.001	0.44	0.000384	NA	NA	0	1.017	0.97	1.017	0.97	1.034	0.975	1.034	0.975	1.094	0.852	1.094	0.852
							exm1273387	rs143392294	22.166	NA	FAM57A	NS	<0.001	0.54	6.62691e-05	<0.001	0.52	0.000233	NA	NA	0	NA	NA	0	NA	NA	0	NA	NA	0	1.1	0.858	1.1	0.858	3.465	0.095	3.465	0.095	0.864	0.81	0.864	0.81
rs11649743	17	36074979	155	10	28	2	exm1315156	rs188307315	411.328	NA	GPR179	NS	>999.999	0.0022	0	>999.999	0.024	0	>999.999	0.48	0	NA	NA	0	>999.999	0.13	0	NA	NA	0	1.014	0.446	1.04	0.363	1.014	0.762	1.082	0.443	1.014	0.484	1.03	0.521
							exm1314676	rs148948026	-130.178	0.003	SYNRG	NS	2.072	0.0024	0.00218688	4.839	0.012	0.000699	1.11	0.9	0.006203	NA	NA	0	3.758	0.034	0.001152	1.564	0.16	0.00654	1	0.994	1.025	0.799	0.962	0.557	0.716	0.224	1.01	0.741	1.057	0.584
							exm1314440	rs7211875	-303.511	0	TADA2A	NS	1.098	0.013	0.160194	1.036	0.72	0.07596	0.924	0.65	0.2345	1.069	0.28	0.2708	1.176	0.054	0.1302	1.204	0.025	0.1409	1.085	0.0251	0.942	0.63	1.111	0.227	1.305	0.332	1.087	0.0298	0.87	0.299
							exm1314706	NA	-95.108	NA	DDX52	NS	4.742	0.039	0.000132556	<0.001	0.5	0.000233	NA	NA	0	NA	NA	0	1.993	0.58	0.000384	>999.999	0.0067	0	1.003	0.921	1.135	0.195	1.037	0.584	1.16	0.52	1.002	0.955	1.114	0.301
							exm1314402	rs117782053	-341.907	NA	C17orf78	NS	1.255	0.042	0.0146455	<0.001	0.46	0.000233	0.844	0.75	0.01861	1.303	0.023	0.0507	<0.001	0.35	0.000384	NA	NA	0	1.008	0.784	0.856	0.638	1.105	0.169	0.597	0.61	0.992	0.791	0.936	0.847
							exm1314973	rs138951204	403.049	NA	MRPL45	NS	>999.999	0.077	0	NA	NA	0	NA	NA	0	>999.999	0.083	0	NA	NA	0	NA	NA	0	0.985	0.826	1.187	0.54	1.255	0.131	1.902	0.209	0.947	0.474	0.883	0.701
							exm1314335	rs2287351	-473.356	0.005	ACACA	NS	1.672	0.12	0.0013922	NA	NA	0	>999.999	0.16	0	1.636	0.14	0.005226	NA	NA	0	NA	NA	0	1.013	0.901	1.039	0.813	0.996	0.986	0.937	0.878	1.007	0.951	1.043	0.806
							exm1314808	rs141193981	-15.838	NA	HNF1B	NS	<0.001	0.16	0.000265111	<0.001	0.52	0.000233	<0.001	0.38	0.001241	NA	NA	0	NA	NA	0	<0.001	0.32	0.0005945	0.725	0.252	0.725	0.252	1.668	0.281	1.668	0.281	0.59	0.0983	0.59	0.0983
							exm1314500	rs139010598	-202.57	NA	DUSP14	NS	0.393	0.23	0.000530152	NA	NA	0	NA	NA	0	NA	NA	0	0.316	0.28	0.001536	0.524	0.56	0.001189	1.047	0.718	0.393	0.228	0.652	0.269	<0.001	0.401	1.103	0.464	0.471	0.336
							exm1315360	rs55687042	477.211	0.01	SOCS7	NS	1.099	0.39	0.0152439	1.077	0.77	0.01049	1.31	0.73	0.006203	NA	NA	0	1.003	0.99	0.01805	1.154	0.33	0.03954	1.099	0.387		NA	0.877	0.641		NA	1.12	0.318		NA
rs4430796	17	36098040	154	10	9	2	exm1315156	rs188307315	388.267	NA	GPR179	NS	>999.999	0.0022	0	>999.999	0.024	0	>999.999	0.48	0	NA	NA	0	>999.999	0.13	0	NA	NA	0	1.014	0.446	1.04	0.363	1.014	0.762	1.082	0.443	1.014	0.484	1.03	0.521
							exm1314676	rs148948026	-153.239	0	SYNRG	NS	2.072	0.0024	0.00218688	4.839	0.012	0.000699	1.11	0.9	0.006203	NA	NA	0	3.758	0.034	0.001152	1.564	0.16	0.00654	1	0.994	1.025	0.799	0.962	0.557	0.716	0.224	1.01	0.741	1.057	0.584
							exm1314440	rs7211875	-326.572	0.002	TADA2A	NS	1.098	0.013	0.160194	1.036	0.72	0.07596	0.924	0.65	0.2345	1.069	0.28	0.2708	1.176	0.054	0.1302	1.204	0.025	0.1409	1.085	0.0251	0.942	0.63	1.111	0.227	1.305	0.332	1.087	0.0298	0.87	0.299
							exm1314706	NA	-118.169	NA	DDX52	NS	4.742	0.039	0.000132556	<0.001	0.5	0.000233	NA	NA	0	NA	NA	0	1.993	0.58	0.000384	>999.999	0.0067	0	1.003	0.921	1.135	0.195	1.037	0.584	1.16	0.52	1.002	0.955	1.114	0.301
							exm1314402	rs117782053	-364.968	NA	C17orf78	NS	1.255	0.042	0.0146455	<0.001	0.46	0.000233	0.844	0.75	0.01861	1.303	0.023	0.0507	<0.001	0.35	0.000384	NA	NA	0	1.008	0.784	0.856	0.638	1.105	0.169	0.597	0.61	0.992	0.791	0.936	0.847
							exm1314973	rs138951204	379.988	NA	MRPL45	NS	>999.999	0.077	0	NA	NA	0	NA	NA	0	>999.999	0.083	0	NA	NA	0	NA	NA	0	0.985	0.826	1.187	0.54	1.255	0.131	1.902	0.209	0.947	0.474	0.883	0.701
							exm1314335	rs2287351	-496.417	0.002	ACACA	NS	1.672	0.12	0.0013922	NA	NA	0	>999.999	0.16	0	1.636	0.14	0.005226	NA	NA	0	NA	NA	0	1.013	0.901	1.039	0.813	0.996	0.986	0.937	0.878	1.007	0.951	1.043	0.806
							exm1314808	rs141193981	-38.899	NA	HNF1B	NS	<0.001	0.16	0.000265111	<0.001	0.52	0.000233	<0.001	0.38	0.001241	NA	NA	0	NA	NA	0	<0.001	0.32	0.0005945	0.725	0.252	0.725	0.252	1.668	0.281	1.668	0.281	0.59	0.0983	0.59	0.0983
							exm1314500	rs139010598	-225.631	NA	DUSP14	NS	0.393	0.23	0.000530152	NA	NA	0	NA	NA	0	NA	NA	0	0.316	0.28	0.001536	0.524	0.56	0.001189	1.047	0.718	0.393	0.228	0.652	0.269	<0.001	0.401	1.103	0.464	0.471	0.336
							exm1315360	rs55687042	454.15	0.009	SOCS7	NS	1.099	0.39	0.0152439	1.077	0.77	0.01049	1.31	0.73	0.006203	NA	NA	0	1.003	0.99	0.01805	1.154	0.33	0.03954	1.099	0.387		NA	0.877	0.641		NA	1.12	0.318		NA
rs11650494	17	47345186	101	14	31	5	exm1333892	NA	-463.922	NA	TTLL6	NS	<0.001	0.0085	0.00072896	<0.001	0.42	0.000233	NA	NA	0	NA	NA	0	<0.001	0.19	0.000768	<0.001	0.035	0.002378	1.006	0.712	0.94	0.576	1.003	0.943	0.635	0.161	1.007	0.683	0.998	0.986
							exm1334232	rs140270910	-101.578	NA	B4GALNT2	NS	0.209	0.02	0.00125911	0.231	0.033	0.003961	<0.001	0.41	0.001241	NA	NA	0	NA	NA	0	<0.001	0.49	0.0002973	1.038	0.122	0.975	0.774	1.049	0.403	1.34	0.114	1.031	0.226	0.905	0.298
							exm1334697	rs75086164	452.572	NA	FAM117A	NS	0.685	0.024	0.00881378	0.699	0.036	0.02982	<0.001	0.67	0.001241	NA	NA	0	0.266	0.21	0.001536	>999.999	0.21	0	0.749	0.0253	0.749	0.0253	0.669	0.239	0.669	0.239	0.752	0.0387	0.752	0.0387
							exm1334325	rs146244763	-45.732	NA	ABI3	SP	0.178	0.063	0.00072896	0.17	0.055	0.002563	NA	NA	0	NA	NA	0	NA	NA	0	NA	NA	0	1.035	0.456	1.152	0.309	0.972	0.795	1.118	0.738	1.043	0.386	1.141	0.371
							exm1334357	rs144781092	-43.103	NA	PHOSPHO1	NS	1.632	0.067	0.00198807	1.605	0.085	0.006757	NA	NA	0	NA	NA	0	0.911	0.95	0.000384	>999.999	0.17	0	1.54	0.0774	1.54	0.0774	1.744	0.293	1.744	0.293	1.578	0.0749	1.578	0.0749
							exm1333942	rs2303015	-415.278	0.006	CALCOCO2	NS	1.078	0.11	0.104175	1.086	0.17	0.2493	1.349	0.17	0.103	1.236	0.19	0.02609	1.144	0.25	0.05991	0.755	0.063	0.04697	1.008	0.799	0.923	0.669	1.026	0.736	0.586	0.357	0.994	0.846	0.869	0.492
							exm1891268	rs114337127	234.245	NA	NGFR	NS	0.568	0.18	0.00165673	NA	NA	0	<0.001	0.68	0.001241	0.553	0.17	0.005964	NA	NA	0	NA	NA	0	1.017	0.76	0.963	0.814	0.92	0.542	0.581	0.28	1.04	0.491	1.012	0.944
							exm1334081	rs2291725	-306.054	0.009	GIP	NS	0.961	0.19	0.469777	1.036	0.62	0.1708	1.189	0.22	0.6092	0.979	0.73	0.7348	0.994	0.91	0.4382	0.858	0.0096	0.5253	0.96	0.171	0.937	0.658	0.967	0.645	1.225	0.546	0.954	0.134	0.903	0.518
							exm1334538	rs138163222	310.814	NA	NXPH3	NS	>999.999	0.2	0	>999.999	0.19	0	NA	NA	0	NA	NA	0	NA	NA	0	NA	NA	0	0.899	0.707	0.899	0.707	1.204	0.759	1.204	0.759	0.909	0.748	0.909	0.748
							exm1334434	rs181916483	49.639	0	ZNF652	NS	1.6	0.22	0.000861498	<0.001	0.43	0.000233	<0.001	0.57	0.002481	NA	NA	0	2.151	0.12	0.002304	1.48	0.61	0.001189	1.1	0.577	1.1	0.577	2.342	0.00452	2.342	0.00452	0.936	0.73	0.936	0.73
							exm1334102	rs143509742	-270.051	NA	IGF2BP1	NS	<0.001	0.28	0.000132556	<0.001	0.3	0.000466	NA	NA	0	NA	NA	0	NA	NA	0	NA	NA	0	0.766	0.238	0.766	0.238	1.131	0.793	1.131	0.793	0.713	0.168	0.713	0.168
							exm1334272	rs9895097	-60.434	NA	GNGT2	NS	1.142	0.34	0.00934394	1.092	0.54	0.03122	NA	NA	0	NA	NA	0	2.212	0.12	0.002304	<0.001	0.44	0.0002973	1.009	0.904	1.143	0.334	1.213	0.271	1.444	0.219	0.959	0.618	1.08	0.608
							exm1334638	NA	438.447	NA	SLC35B1	NS	0.483	0.37	0.000397614	<0.001	0.23	0.000699	NA	NA	0	NA	NA	0	1.204	0.85	0.000768	<0.001	0.42	0.0002973	0.941	0.751	0.941	0.751	0.381	0.161	0.381	0.161	1.006	0.975	1.006	0.975
							exm1334030	rs147268784	-337.314	NA	SNF8	NS	0.904	0.91	0.000265076	0.931	0.93	0.000932	NA	NA	0	NA	NA	0	NA	NA	0	NA	NA	0	0.904	0.908	0.904	0.908	<0.001	0.617	<0.001	0.617	1.11	0.905	1.11	0.905
rs7210100	17	47436749	78	15	6	1	exm1334232	rs140270910	-193.141	NA	B4GALNT2	NS	0.209	0.02	0.00125911	0.231	0.033	0.003961	<0.001	0.41	0.001241	NA	NA	0	NA	NA	0	<0.001	0.49	0.0002973	1.038	0.122	0.975	0.774	1.049	0.403	1.34	0.114	1.031	0.226	0.905	0.298
							exm1334697	rs75086164	361.009	NA	FAM117A	NS	0.685	0.024	0.00881378	0.699	0.036	0.02982	<0.001	0.67	0.001241	NA	NA	0	0.266	0.21	0.001536	>999.999	0.21	0	0.749	0.0253	0.749	0.0253	0.669	0.239	0.669	0.239	0.752	0.0387	0.752	0.0387
							exm1334325	rs146244763	-137.295	NA	ABI3	SP	0.178	0.063	0.00072896	0.17	0.055	0.002563	NA	NA	0	NA	NA	0	NA	NA	0	NA	NA	0	1.035	0.456	1.152	0.309	0.972	0.795	1.118	0.738	1.043	0.386	1.141	0.371
							exm1334357	rs144781092	-134.666	NA	PHOSPHO1	NS	1.632	0.067	0.00198807	1.605	0.085	0.006757	NA	NA	0	NA	NA	0	0.911	0.95	0.000384	>999.999	0.17	0	1.54	0.0774	1.54	0.0774	1.744	0.293	1.744	0.293	1.578	0.0749	1.578	0.0749
							exm1334770	rs59624095	484.685	NA	TAC4	NS	<0.001	0.084	0.000331345	<0.001	0.25	0.000699	NA	NA	0	<0.001	0.47	0.0002485	<0.001	0.28	0.000384	NA	NA	0	0.82	0.213	0.82	0.213	0.4	0.106	0.4	0.106	0.908	0.559	0.908	0.559
							exm1891268	rs114337127	142.682	NA	NGFR	NS	0.568	0.18	0.00165673	NA	NA	0	<0.001	0.68	0.001241	0.553	0.17	0.005964	NA	NA	0	NA	NA	0	1.017	0.76	0.963	0.814	0.92	0.542	0.581	0.28	1.04	0.491	1.012	0.944
							exm1334081	rs2291725	-397.617	0.002	GIP	NS	0.961	0.19	0.469777	1.036	0.62	0.1708	1.189	0.22	0.6092	0.979	0.73	0.7348	0.994	0.91	0.4382	0.858	0.0096	0.5253	0.96	0.171	0.937	0.658	0.967	0.645	1.225	0.546	0.954	0.134	0.903	0.518
							exm1334538	rs138163222	219.251	NA	NXPH3	NS	>999.999	0.2	0	>999.999	0.19	0	NA	NA	0	NA	NA	0	NA	NA	0	NA	NA	0	0.899	0.707	0.899	0.707	1.204	0.759	1.204	0.759	0.909	0.748	0.909	0.748
							exm1334434	rs181916483	-41.924	0	ZNF652	NS	1.6	0.22	0.000861498	<0.001	0.43	0.000233	<0.001	0.57	0.002481	NA	NA	0	2.151	0.12	0.002304	1.48	0.61	0.001189	1.1	0.577	1.1	0.577	2.342	0.00452	2.342	0.00452	0.936	0.73	0.936	0.73
							exm1334102	rs143509742	-361.614	NA	IGF2BP1	NS	<0.001	0.28	0.000132556	<0.001	0.3	0.000466	NA	NA	0	NA	NA	0	NA	NA	0	NA	NA	0	0.766	0.238	0.766	0.238	1.131	0.793	1.131	0.793	0.713	0.168	0.713	0.168
							exm1334741	NA	452.096	NA	MYST2	NS	>999.999	0.33	0	NA	NA	0	NA	NA	0	NA	NA	0	>999.999	0.37	0	NA	NA	0	1.243	0.418	1.243	0.418	0.506	0.496	0.506	0.496	1.367	0.255	1.367	0.255
							exm1334272	rs9895097	-151.997	NA	GNGT2	NS	1.142	0.34	0.00934394	1.092	0.54	0.03122	NA	NA	0	NA	NA	0	2.212	0.12	0.002304	<0.001	0.44	0.0002973	1.009	0.904	1.143	0.334	1.213	0.271	1.444	0.219	0.959	0.618	1.08	0.608
							exm1334638	NA	346.884	NA	SLC35B1	NS	0.483	0.37	0.000397614	<0.001	0.23	0.000699	NA	NA	0	NA	NA	0	1.204	0.85	0.000768	<0.001	0.42	0.0002973	0.941	0.751	0.941	0.751	0.381	0.161	0.381	0.161	1.006	0.975	1.006	0.975
							exm1334030	rs147268784	-428.877	NA	SNF8	NS	0.904	0.91	0.000265076	0.931	0.93	0.000932	NA	NA	0	NA	NA	0	NA	NA	0	NA	NA	0	0.904	0.908	0.904	0.908	<0.001	0.617	<0.001	0.617	1.11	0.905	1.11	0.905
							exm1333942	rs2303015	-506.841	NA	CALCOCO2	NS	1.078	0.11	0.104175	1.086	0.17	0.2493	1.349	0.17	0.103	1.236	0.19	0.02609	1.144	0.25	0.05991	0.755	0.063	0.04697	1.008	0.799	0.923	0.669	1.026	0.736	0.586	0.357	0.994	0.846	0.869	0.492
rs7241993	18	76773973	62	3	22	2	exm1394477	rs147249454	359.972	NA	ATP9B	NS	0.521	0.037	0.00304838	0.467	0.022	0.01048	NA	NA	0	NA	NA	0	2.183	0.53	0.000384	NA	NA	0	0.95	0.364	0.959	0.545	0.744	0.063	0.67	0.052	0.971	0.63	0.991	0.904
							exm1394254	NA	-16.745	NA	SALL3	NS	4.498	0.049	0.000132538	NA	NA	0	NA	NA	0	4.51	0.052	0.000497	NA	NA	0	NA	NA	0	0.986	0.637	1.057	0.677	0.936	0.356	0.282	0.0213	0.991	0.779	1.161	0.278
							exm1394598	rs141310123	397.417	NA	NFATC1	NS	2.082	0.081	0.000662691	4.567	0.17	0.000233	<0.001	0.41	0.002481	<0.001	0.49	0.0002485	2.003	0.33	0.001152	3.155	0.098	0.0008918	1.046	0.102	1.06	0.573	1.083	0.222	0.564	0.0758	1.04	0.175	1.124	0.273
rs8102476	19	38735613	281	19	37	8	exm1462037	rs35496032	82.015	0.006	KCNK6	SP	1.633	0.017	0.00337972	1.038	0.95	0.00233	0.685	0.74	0.004963	NA	NA	0	2.37	0.044	0.003072	1.702	0.053	0.008621	1.016	0.562	1.562	0.0179	1.089	0.181	0.968	0.95	1.01	0.748	1.696	0.00623
							exm1463810	rs141070964	489.873	NA	CAPN12	NS	>999.999	0.017	0	>999.999	0.15	0	NA	NA	0	NA	NA	0	NA	NA	0	>999.999	0.053	0	0.997	0.932	0.949	0.669	0.934	0.359	0.866	0.645	1.011	0.742	0.953	0.713
							exm1936147	rs113969422	484.393	NA	ACTN4	NS	0.564	0.02	0.00437376	0.739	0.26	0.01165	<0.001	0.54	0.001241	NA	NA	0	0.12	0.019	0.003456	0.324	0.27	0.001784	0.853	0.173	0.853	0.173	0.847	0.565	0.847	0.565	0.87	0.258	0.87	0.258
							exm1461609	NA	-103.757	NA	SIPA1L3	NS	2.585	0.024	0.000662691	NA	NA	0	NA	NA	0	2.466	0.039	0.002485	>999.999	0.35	0	NA	NA	0	1.034	0.364	1.045	0.528	1.108	0.227	0.925	0.654	1.025	0.523	1.041	0.586
							exm1461315	rs117923468	-355.914	NA	WDR87	NS	1.215	0.026	0.0220072	1.247	0.73	0.001398	1.116	0.66	0.08333	1.245	0.13	0.03232	1.236	0.11	0.04455	1.372	0.49	0.003864	1.009	0.587	0.914	0.28	1.024	0.533	0.707	0.132	1.004	0.831	0.962	0.653
							exm1461844	rs140507040	6.419	NA	PPP1R14A	NS	3.942	0.033	0.000198807	2.451	0.51	0.000233	NA	NA	0	NA	NA	0	>999.999	0.29	0	4.412	0.053	0.0005945	1.201	0.421	1.201	0.421	0.262	0.154	0.262	0.154	1.309	0.247	1.309	0.247
							exm1462574	rs183422897	176.996	NA	RASGRP4	SP	3.794	0.039	0.000198807	>999.999	0.11	0	>999.999	0.062	0	NA	NA	0	2.689	0.22	0.000768	1.824	0.67	0.0002973	0.902	0.0343	0.894	0.484	1.129	0.271	1.215	0.569	0.875	0.0101	0.886	0.478
							exm1461892	rs11548457	46.872	0.056	SPINT2	NS	0.802	0.046	0.0166998	0.868	0.64	0.009087	0.613	0.49	0.01117	<0.001	0.29	0.000497	0.93	0.68	0.0288	0.711	0.047	0.03775	0.862	0.144	1.276	0.328	1.084	0.713	1.715	0.305	0.808	0.0527	1.094	0.746
							exm1463297	rs145087576	291.064	NA	RYR1	ST	>999.999	0.057	0	NA	NA	0	>999.999	0.072	0	NA	NA	0	>999.999	0.26	0	NA	NA	0	0.981	0.513	0.966	0.406	0.897	0.149	0.853	0.169	0.986	0.654	0.968	0.465
							exm1462109	NA	114.54	NA	CATSPERG	ST	>999.999	0.058	0	NA	NA	0	NA	NA	0	NA	NA	0	NA	NA	0	>999.999	0.054	0	1.002	0.936	1.028	0.839	1.093	0.221	0.966	0.922	1	0.991	1.045	0.76
							exm1463524	rs34591617	363.153	NA	MAP4K1	NS	1.473	0.1	0.00284957	NA	NA	0	0.746	0.64	0.01365	1.55	0.12	0.007455	>999.999	0.22	0	1.958	0.51	0.0005945	0.974	0.701	1.029	0.853	0.944	0.743	0.512	0.182	0.973	0.708	1.041	0.801
							exm1463593	rs78751736	387.514	NA	EIF3K	NS	0.696	0.11	0.00490391	0.677	0.092	0.01678	NA	NA	0	NA	NA	0	>999.999	0.22	0	<0.001	0.36	0.0005945	0.709	0.109	0.709	0.109	0.222	0.102	0.222	0.102	0.821	0.365	0.821	0.365
							exm1462248	NA	129.804	NA	PSMD8	NS	1.482	0.12	0.00238663	1.363	0.24	0.008162	NA	NA	0	NA	NA	0	2.584	0.39	0.0003843	>999.999	0.15	0	1.46	0.111	1.46	0.111	1.319	0.647	1.319	0.647	1.376	0.21	1.376	0.21
							exm1462477	NA	163.879	NA	FAM98C	ST	1.672	0.18	0.000927767	1.576	0.27	0.003029	NA	NA	0	NA	NA	0	2.063	0.55	0.000384	NA	NA	0	1.015	0.684	1.058	0.619	1.074	0.419	1.028	0.922	1.015	0.702	1.045	0.716
							exm1462322	rs56854837	140.739	0.041	GGN	NS	1.051	0.28	0.103791	0.87	0.56	0.01421	0.921	0.61	0.2568	1.075	0.27	0.2161	1.092	0.35	0.101	1.028	0.84	0.04935	1.027	0.409	0.988	0.93	1.04	0.614	0.513	0.134	1.028	0.421	1.063	0.659
							exm1462416	rs142553701	149.784	0.067	SPRED3	NS	1.098	0.45	0.0116017	1.218	0.51	0.007229	<0.001	0.059	0.008685	<0.001	0.48	0.0002485	0.968	0.89	0.01614	1.214	0.25	0.02794	1.103	0.421	1.536	0.638	1.766	0.0134	8.792	0.00949	1.037	0.78	0.662	0.736
							exm1461821	NA	-26.004	NA	DPF1	NS	<0.001	0.47	6.62691e-05	NA	NA	0	NA	NA	0	NA	NA	0	NA	NA	0	<0.001	0.47	0.0002973	1.07	0.896	1.07	0.896	1.592	0.657	1.592	0.657	1.061	0.914	1.061	0.914
							exm1461972	rs146732500	64.432	NA	YIF1B	SP	<0.001	0.55	6.62691e-05	NA	NA	0	<0.001	0.51	0.001241	NA	NA	0	NA	NA	0	NA	NA	0	1.027	0.56	<0.001	0.554	1.012	0.916	<0.001	0.793	1.022	0.655	<0.001	0.6
							exm1461922	rs79297344	59.941	NA	C19orf33	NS	0.999	0.99	0.145924	0.988	0.91	0.0692	0.612	0.03	0.1315	1.039	0.6	0.1737	1.019	0.79	0.2193	1.007	0.93	0.1573	0.999	0.985	NA	NA	1.08	0.394	NA	NA	0.993	0.858	NA	NA
rs11672691	19	41985587	164	27	40	7	exm1472153	rs141738557	425.337	NA	ARHGEF1	NS	0.09	0.0035	0.00119411	0.093	0.0041	0.004196	NA	NA	0	NA	NA	0	NA	NA	0	NA	NA	0	0.98	0.874	0.98	0.874	1.083	0.789	1.083	0.789	0.997	0.982	0.997	0.982
							exm1471967	rs144367487	397.764	NA	CD79A	NS	0.113	0.011	0.000994036	<0.001	0.21	0.000932	NA	NA	0	NA	NA	0	NA	NA	0	0.162	0.047	0.00327	0.759	0.264	0.759	0.264	0.591	0.463	0.591	0.463	0.766	0.309	0.766	0.309
							exm1938985	rs185136417	-47.297	NA	ATP5SL	NS	0.372	0.019	0.00145792	NA	NA	0	NA	NA	0	NA	NA	0	0.382	0.026	0.008065	<0.001	0.48	0.0002973	0.999	0.966	0.84	0.157	0.992	0.822	1.097	0.727	1.002	0.89	0.831	0.157
							exm1470889	rs138157924	-163.13	NA	CCDC97	NS	1.532	0.02	0.0036448	2.04	0.38	0.000699	4.053	0.3	0.001241	NA	NA	0	1.392	0.091	0.0192	11.95	0.0058	0.0002973	1.212	0.173	1.212	0.173	1.233	0.52	1.233	0.52	1.248	0.131	1.248	0.131
							exm1470443	rs149278083	-356.826	NA	CYP2F1	NS	0.16	0.048	0.000596421	0.242	0.15	0.001631	NA	NA	0	NA	NA	0	<0.001	0.32	0.000384	<0.001	0.47	0.0002973	1.022	0.892	1.022	0.892	1.234	0.572	1.234	0.572	0.941	0.732	0.941	0.732
							exm1470968	rs151105395	-134.905	NA	TGFB1	NS	>999.999	0.058	0	>999.999	0.16	0	NA	NA	0	NA	NA	0	NA	NA	0	>999.999	0.18	0	1.069	0.555	>999.999	0.0134	1.599	0.0304	>999.999	1.33e-05	1.05	0.683	>999.999	0.0279
							exm1471628	rs7249230	236.02	0.023	CEACAM5	NS	0.924	0.061	0.126972	1.036	0.79	0.0431	0.736	0.12	0.1613	0.926	0.33	0.1454	0.873	0.12	0.1363	0.928	0.32	0.1965	0.932	0.0371	1.186	0.358	0.903	0.224	0.647	0.46	0.943	0.1	1.33	0.132
							exm1471697	rs145334885	274.992	NA	CEACAM6	NS	0.687	0.064	0.00609756	0.719	0.11	0.02051	<0.001	0.54	0.001241	NA	NA	0	<0.001	0.15	0.000768	<0.001	0.61	0.0002973	0.77	0.11	0.77	0.11	0.666	0.369	0.666	0.369	0.797	0.188	0.797	0.188
							exm1471382	rs78133615	98.233	0.076	CEACAM21	NS	1.082	0.082	0.142848	1.373	0.046	0.02309	1.01	0.95	0.1898	1.086	0.13	0.4237	0.776	0.097	0.04186	1.277	0.17	0.02646	1.005	0.59	0.681	0.479	0.999	0.968	<0.001	0.381	1.002	0.839	0.468	0.237
							exm1470797	rs149059713	-203.424	NA	HNRNPUL1	NS	>999.999	0.087	0	NA	NA	0	NA	NA	0	NA	NA	0	NA	NA	0	>999.999	0.13	0	1.104	0.649	1.104	0.649	1.392	0.482	1.392	0.482	1.084	0.726	1.084	0.726
							exm1471921	rs143477104	379.325	NA	RPS19	NS	<0.001	0.093	0.000397614	<0.001	0.37	0.000466	<0.001	0.64	0.001241	<0.001	0.47	0.0002485	NA	NA	0	<0.001	0.32	0.0005945	0.425	0.256	0.425	0.256	<0.001	0.468	<0.001	0.468	0.511	0.379	0.511	0.379
							exm1471516	NA	205.334	NA	CEACAM7	NS	>999.999	0.13	0	NA	NA	0	NA	NA	0	>999.999	0.15	0	NA	NA	0	NA	NA	0	1.085	0.244	1.029	0.849	1.069	0.707	1.407	0.305	1.073	0.347	0.897	0.518
							exm1471910	rs141103699	370.109	NA	DMRTC2	ST	>999.999	0.15	0	NA	NA	0	NA	NA	0	NA	NA	0	NA	NA	0	>999.999	0.15	0	0.706	0.608	0.706	0.608	<0.001	0.506	<0.001	0.506	0.844	0.803	0.844	0.803
							exm1470374	NA	-383.877	NA	CYP2A13	NS	0.507	0.16	0.000927767	<0.001	0.53	0.000233	<0.001	0.48	0.001241	NA	NA	0	0.587	0.3	0.004224	<0.001	0.48	0.0002973	0.714	0.154	0.714	0.154	0.23	0.113	0.23	0.113	0.825	0.423	0.825	0.423
							exm1471119	rs150177278	-69.029	NA	BCKDHA	NS	<0.001	0.16	0.000198807	<0.001	0.17	0.000699	NA	NA	0	NA	NA	0	NA	NA	0	NA	NA	0	0.996	0.938	0.806	0.167	1.185	0.177	0.812	0.593	0.983	0.776	0.824	0.241
							exm1470604	NA	-273.642	NA	CYP2S1	NS	<0.001	0.18	0.000132538	NA	NA	0	NA	NA	0	NA	NA	0	<0.001	0.21	0.000384	<0.001	0.46	0.0002973	0.992	0.972	0.992	0.972	1.9	0.111	1.9	0.111	0.847	0.521	0.847	0.521
							exm1471071	rs140989771	-92.085	NA	EXOSC5	NS	>999.999	0.18	0	NA	NA	0	NA	NA	0	NA	NA	0	NA	NA	0	>999.999	0.15	0	0.995	0.855	0.631	0.193	0.959	0.546	<0.001	0.188	1.001	0.971	0.756	0.433
							exm1471244	rs138486322	-53.475	NA	B3GNT8	NS	0.596	0.18	0.00178926	0.536	0.14	0.005825	<0.001	0.2	0.001241	NA	NA	0	>999.999	0.19	0	<0.001	0.45	0.0002973	1.028	0.887	1.028	0.887	1.134	0.785	1.134	0.785	1.029	0.891	1.029	0.891
							exm1470226	rs34826503	-467.343	NA	CYP2B6	NS	0.49	0.19	0.00112672	0.399	0.14	0.003495	NA	NA	0	1.085	0.95	0.000497	NA	NA	0	NA	NA	0	0.895	0.243	0.73	0.139	0.945	0.811	0.613	0.405	0.887	0.237	0.786	0.277
							exm1471025	rs77399851	-101.26	NA	TMEM91	NS	1.139	0.22	0.0158383	1.037	0.76	0.04846	0.862	0.9	0.003722	2.977	0.00063	0.003728	0.99	0.98	0.003072	0.814	0.81	0.001486	1.128	0.25	0.461	0.475	0.917	0.761	<0.001	0.632	1.106	0.369	0.545	0.582
							exm1471802	NA	328.777	NA	CEACAM3	NS	>999.999	0.23	0	NA	NA	0	NA	NA	0	NA	NA	0	NA	NA	0	>999.999	0.2	0	>999.999	0.23	>999.999	0.23		NA		NA	>999.999	0.194	>999.999	0.194
							exm1471017	rs2241714	-116.195	0	B9D2	NS	0.967	0.26	0.362871	1.035	0.62	0.1817	1.011	0.94	0.4293	0.971	0.6	0.509	0.929	0.2	0.4531	0.934	0.28	0.3335	0.968	0.262	1.159	0.652	0.918	0.225	<0.001	0.222	0.978	0.467	1.275	0.468
							exm1471444	rs146123396	142.51	NA	CEACAM4	NS	1.199	0.29	0.00576541	1.157	0.42	0.01841	NA	NA	0	NA	NA	0	2.135	0.18	0.00192	0.574	0.64	0.0008918	1.013	0.773	1.159	0.266	1.086	0.455	1.451	0.205	1.02	0.68	1.164	0.276
							exm1472198	rs149600313	488.035	NA	ATP1A3	NS	0.553	0.3	0.000795229	0.202	0.09	0.00233	NA	NA	0	>999.999	0.24	0	0.948	0.96	0.000768	NA	NA	0	0.623	0.253	0.623	0.253	<0.001	0.218	<0.001	0.218	0.675	0.367	0.675	0.367
							exm1470651	rs140091980	-257.767	0	AXL	NS	<0.001	0.31	0.000132696	NA	NA	0	NA	NA	0	NA	NA	0	NA	NA	0	<0.001	0.3	0.0005949	0.944	0.655	0.944	0.655	1.157	0.614	1.157	0.614	0.879	0.359	0.879	0.359
							exm1471849	rs112654847	357.406	NA	LYPD4	NS	0.844	0.4	0.00550033	0.767	0.2	0.01911	NA	NA	0	NA	NA	0	1.278	0.86	0.000384	>999.999	0.066	0	0.942	0.367	0.91	0.565	0.72	0.06	0.747	0.532	0.992	0.91	0.921	0.637
							exm1471357	rs139707196	-35.538	NA	C19orf69	NS	0.904	0.5	0.00914634	0.849	0.3	0.03052	0.959	0.97	0.002481	NA	NA	0	2.687	0.13	0.001153	<0.001	0.35	0.0005945	0.994	0.938	0.885	0.388	1.12	0.564	0.859	0.68	0.981	0.818	0.94	0.676
rs2735839	19	51364623	328	40	67	10	exm1495645	rs17632542	-2.866	0.469	KLK3	NS	0.78	0.0046	0.028562	1.242	0.29	0.01514	0.774	0.59	0.02233	>999.999	0.32	0	0.746	0.078	0.03571	0.678	0.0018	0.0758	0.995	0.807	0.995	0.977	0.977	0.64	1.652	0.154	0.996	0.87	0.896	0.582
							exm1496145	rs117268623	163.347	0.004	KLK11	NS	0.713	0.0065	0.0145811	0.591	0.14	0.008159	1.39	0.63	0.007444	0.462	0.21	0.003231	0.774	0.22	0.02227	0.686	0.046	0.0321	1.025	0.406	1.007	0.955	1.02	0.785	0.787	0.508	1.017	0.602	1.032	0.819
							exm1494360	rs3219457	-443.486	NA	POLD1	NS	>999.999	0.024	0	>999.999	0.018	0	NA	NA	0	NA	NA	0	NA	NA	0	NA	NA	0	0.98	0.486	1.02	0.795	0.932	0.338	0.782	0.238	0.996	0.895	1.045	0.587
							exm1495845	rs77760094	97.831	0	KLK6	NS	0.751	0.029	0.0131213	0.779	0.098	0.03541	0.87	0.91	0.004963	3.974	0.23	0.0002485	0.666	0.27	0.00768	0.567	0.2	0.006243	0.861	0.0386	0.395	0.085	0.695	0.0672	0.811	0.839	0.905	0.188	0.35	0.0809
							exm1496441	rs144680080	265.814	NA	SIGLEC9	ST	>999.999	0.03	0	>999.999	0.24	0	NA	NA	0	>999.999	0.32	0	NA	NA	0	>999.999	0.17	0	1.022	0.215	1.335	0.0965	0.997	0.947	1.393	0.406	1.022	0.247	1.351	0.0998
							exm1947433	NA	-399.389	NA	MYBPC2	NS	1.98	0.035	0.00125911	NA	NA	0	NA	NA	0	1.93	0.048	0.004722	NA	NA	0	>999.999	0.16	0	0.986	0.392	0.985	0.775	1.033	0.384	1.083	0.496	0.979	0.218	0.971	0.603
							exm1496654	rs140988748	403.997	NA	C19orf75	SP	<0.001	0.037	0.000463883	<0.001	0.22	0.000699	<0.001	0.55	0.001241	NA	NA	0	<0.001	0.23	0.000384	<0.001	0.29	0.0005945	0.973	0.879	0.973	0.879	0.564	0.327	0.564	0.327	1.039	0.84	1.039	0.84
							exm1495359	rs147927697	-70.945	NA	ACPT	NS	>999.999	0.051	0	NA	NA	0	NA	NA	0	>999.999	0.12	0	NA	NA	0	>999.999	0.18	0	0.999	0.966	0.938	0.704	0.97	0.43	1.282	0.475	1.002	0.898	0.89	0.517
							exm1495140	rs41275782	-192.097	0.004	SHANK1	NS	1.113	0.053	0.0675282	1.178	0.058	0.09343	0.798	0.17	0.2543	1.322	0.016	0.05268	1.027	0.87	0.03264	1.1	0.55	0.03448	0.983	0.563	0.936	0.515	1.027	0.711	0.828	0.481	0.98	0.519	0.933	0.518
							exm1495337	NA	-90.113	NA	GPR32	NS	6.428	0.065	6.62691e-05	>999.999	0.11	0	NA	NA	0	NA	NA	0	NA	NA	0	3.917	0.23	0.0002973	1.307	0.195	1.307	0.195	2.414	0.0182	2.414	0.0182	1.166	0.497	1.166	0.497
							exm1496583	rs144102805	363.998	NA	CD33	NS	1.842	0.067	0.00119284	1.765	0.092	0.004194	NA	NA	0	NA	NA	0	>999.999	0.39	0	NA	NA	0	0.963	0.185	0.896	0.234	0.975	0.72	0.873	0.57	0.961	0.189	0.891	0.243
							exm1495946	rs16988799	138.662	0.011	KLK8	NS	0.89	0.074	0.050497	0.913	0.31	0.09925	1.064	0.89	0.02109	<0.001	0.34	0.0002485	0.945	0.7	0.04263	0.802	0.094	0.06153	0.893	0.0786	0.998	0.994	1.025	0.869	1.308	0.669	0.867	0.0373	0.938	0.846
							exm1496033	rs140908390	153.489	NA	KLK10	NS	<0.001	0.078	0.000397614	<0.001	0.082	0.001398	NA	NA	0	NA	NA	0	NA	NA	0	NA	NA	0	0.996	0.889	1.073	0.592	0.977	0.748	1.665	0.0447	1.001	0.988	1.012	0.931
							exm1496303	rs187905695	217.534	NA	KLK14	NS	0.628	0.08	0.00351226	0.616	0.081	0.01165	NA	NA	0	NA	NA	0	0.826	0.84	0.001152	NA	NA	0	1.002	0.912	0.993	0.915	1.032	0.4	0.946	0.731	0.996	0.79	1.004	0.958
							exm1494392	rs143398036	-437.721	NA	SPIB	NS	0.3	0.097	0.000861498	<0.001	0.42	0.000466	NA	NA	0	NA	NA	0	<0.001	0.22	0.000384	0.388	0.21	0.002973	0.803	0.372	0.803	0.372	<0.001	0.0621	<0.001	0.0621	0.954	0.85	0.954	0.85
							exm1495924	rs146109513	120.449	NA	KLK7	NS	<0.001	0.1	0.000265076	<0.001	0.54	0.000233	NA	NA	0	NA	NA	0	<0.001	0.28	0.000384	<0.001	0.29	0.0005945	0.885	0.389	0.885	0.389	0.569	0.21	0.569	0.21	0.913	0.54	0.913	0.54
							exm1495522	NA	-41.33	NA	KLK1	SP	>999.999	0.11	0	NA	NA	0	NA	NA	0	NA	NA	0	>999.999	0.34	0	>999.999	0.16	0	0.977	0.353	1.185	0.512	0.95	0.395	1.187	0.776	0.982	0.498	1.21	0.483
							exm1495593	rs138137675	-33.672	NA	KLK15	NS	1.256	0.11	0.00855778	1.182	0.25	0.02965	NA	NA	0	NA	NA	0	2.746	0.21	0.000768	NA	NA	0	1.151	0.0527	1.151	0.0527	1.33	0.0704	1.33	0.0704	1.112	0.172	1.112	0.172
							exm1496200	rs147175192	170.614	NA	KLK12	NS	5.134	0.11	6.62691e-05	>999.999	0.026	0	NA	NA	0	NA	NA	0	NA	NA	0	<0.001	0.45	0.0002973	1.013	0.644	1.166	0.397	1.082	0.231	1.059	0.899	0.993	0.805	1.234	0.265
							exm1496738	rs147142812	472.864	0.001	VSIG10L	NS	2.127	0.11	0.000530152	3.81	0.24	0.000233	>999.999	0.31	0	NA	NA	0	0.711	0.78	0.000768	2.265	0.17	0.001486	0.97	0.184	1.075	0.592	0.994	0.915	1.318	0.356	0.971	0.214	1.069	0.641
							exm1495702	rs181308768	15.175	0.001	KLK2	NS	<0.001	0.14	0.000198807	NA	NA	0	NA	NA	0	NA	NA	0	<0.001	0.16	0.000768	<0.001	0.51	0.0002973	1.008	0.791	0.756	0.203	1.102	0.171	1.13	0.793	0.993	0.822	0.722	0.172
							exm1496795	rs148443220	485.587	NA	ETFB	NS	3.558	0.14	0.000132538	3.193	0.18	0.000466	NA	NA	0	NA	NA	0	NA	NA	0	NA	NA	0	0.973	0.314	0.898	0.475	0.923	0.217	1.052	0.884	0.985	0.609	0.868	0.382
							exm1494733	rs144996610	-379.453	0	C19orf63	NS	1.271	0.15	0.00563362	1.562	0.24	0.003961	0.517	0.56	0.006203	<0.001	0.53	0.0002486	1.567	0.18	0.00576	1.126	0.62	0.01397	1.07	0.56	1.07	0.56	0.7	0.29	0.7	0.29	1.106	0.409	1.106	0.409
							exm1496246	rs142773664	197.248	NA	KLK13	NS	>999.999	0.17	0	NA	NA	0	NA	NA	0	>999.999	0.19	0	NA	NA	0	NA	NA	0	0.86	0.174	0.754	0.436	0.862	0.581	<0.001	0.163	0.83	0.118	0.829	0.615
							exm1494952	NA	-229.055	NA	SYT3	NS	>999.999	0.18	0	NA	NA	0	NA	NA	0	NA	NA	0	NA	NA	0	>999.999	0.17	0	0.894	0.699	0.894	0.699	0.876	0.857	0.876	0.857	0.955	0.879	0.955	0.879
							exm1495485	rs7251816	-62.936	NA	C19orf48	NS	1.155	0.19	0.0156395	1.163	0.18	0.05312	NA	NA	0	<0.001	0.39	0.000497	1.054	0.93	0.002304	>999.999	0.1	0	1.007	0.676	0.938	0.676	0.974	0.49	0.732	0.464	1.011	0.489	1.021	0.898
							exm1495764	rs145560168	47.449	0.006	KLK4	NS	2.204	0.19	0.000331565	1.655	0.72	0.0002331	NA	NA	0	NA	NA	0	1.187	0.9	0.000384	2.711	0.18	0.0008918	1.064	0.533	1.04	0.856	0.719	0.255	0.242	0.127	1.091	0.403	1.125	0.594
							exm1495820	rs117067639	87.734	NA	KLK5	NS	<0.001	0.19	0.000198807	<0.001	0.55	0.000233	NA	NA	0	NA	NA	0	<0.001	0.34	0.000384	<0.001	0.5	0.0002973	0.881	0.446	0.881	0.446	0.797	0.587	0.797	0.587	0.864	0.409	0.864	0.409
							exm1494756	rs141164117	-355.183	NA	JOSD2	NS	<0.001	0.2	0.000198807	NA	NA	0	NA	NA	0	<0.001	0.18	0.0007455	NA	NA	0	NA	NA	0	1.131	0.606	1.131	0.606	1.564	0.395	1.564	0.395	1.158	0.556	1.158	0.556
							exm1494897	rs142075522	-312.55	0.001	LRRC4B	NS	1.307	0.2	0.00351226	0.963	0.94	0.002563	0.661	0.72	0.004963	NA	NA	0	1.831	0.13	0.00384	1.248	0.47	0.008323	1.182	0.339	1.182	0.339	1.38	0.392	1.38	0.392	1.231	0.254	1.231	0.254
							exm1495996	NA	145.106	NA	KLK9	NS	>999.999	0.22	0	NA	NA	0	NA	NA	0	NA	NA	0	NA	NA	0	>999.999	0.19	0	1.097	0.627	1.097	0.627	1.094	0.847	1.094	0.847	1.014	0.948	1.014	0.948
							exm1494630	rs736769	-393.614	NA	FAM71E1	NS	1.132	0.26	0.0153082	1.104	0.38	0.05172	<0.001	0.67	0.001241	NA	NA	0	1.759	0.28	0.002304	0.775	0.84	0.0005945	1.152	0.135	1.184	0.328	1.321	0.21	1.727	0.118	1.089	0.403	1.067	0.731
							exm1947631	NA	-137.825	NA	CLEC11A	NS	<0.001	0.26	0.000199627	NA	NA	0	NA	NA	0	<0.001	0.28	0.0007474	NA	NA	0	NA	NA	0	0.997	0.984	0.997	0.984	0.906	0.816	0.906	0.816	0.981	0.913	0.981	0.913
							exm1496371	rs17855403	242.884	0	CTU1	NS	1.037	0.37	0.13408	1.057	0.53	0.08947	1.238	0.26	0.1206	1.077	0.26	0.2157	0.87	0.2	0.08333	1.014	0.87	0.1359	1.037	0.367	NA	NA	0.888	0.247	NA	NA	1.065	0.142	NA	NA
							exm1496543	NA	291.807	NA	SIGLEC7	NS	<0.001	0.52	6.62691e-05	NA	NA	0	NA	NA	0	NA	NA	0	NA	NA	0	<0.001	0.48	0.0002973	1.046	0.829	1.046	0.829	0.997	0.995	0.997	0.995	1.031	0.89	1.031	0.89
							exm1947212	NA	-482.622	NA	NR1H2	NS	<0.001	0.55	6.62691e-05	NA	NA	0	NA	NA	0	<0.001	0.58	0.0002485	NA	NA	0	NA	NA	0	1.051	0.81	1.051	0.81	1.567	0.299	1.567	0.299	1.028	0.9	1.028	0.9
							exm1496705	NA	462.484	NA	IGLON5	NS	0.748	0.55	0.000927767	1.342	0.67	0.000466	0.552	0.38	0.01365	NA	NA	0	NA	NA	0	<0.001	0.54	0.0002973	0.748	0.547	0.748	0.547	<0.001	0.384	<0.001	0.384	0.879	0.789	0.879	0.789
							exm1494825	rs145984137	-346.861	NA	ASPDH	NS	<0.001	0.56	6.62691e-05	NA	NA	0	NA	NA	0	NA	NA	0	NA	NA	0	<0.001	0.5	0.0002973	0.999	0.987	1.049	0.732	1.417	0.0777	1.694	0.0521	0.899	0.287	0.9	0.498
							exm1494994	rs4801844	-205.052	0.003	LOC342918	NS	0.986	0.72	0.147519	0.999	0.99	0.1191	0.81	0.19	0.2973	0.987	0.85	0.1983	0.918	0.32	0.1307	1.142	0.17	0.1005	0.983	0.657	1.009	0.965	0.856	0.114	0.437	0.239	0.987	0.744	1.109	0.638
							exm1493970	NA	-502.739	NA	NAPSA	NS	3.007	0.18	0.000132538	2.599	0.28	0.000466	NA	NA	0	NA	NA	0	>999.999	0.37	0	NA	NA	0	0.995	0.87	1.082	0.564	0.893	0.103	0.558	0.199	1.018	0.547	1.095	0.531
rs2427345	20	61015611	342	20	45	5	exm1556106	rs13042941	-106.642	0	LAMA5	NS	0.882	0.0012	0.226471	0.917	0.11	0.5622	1.091	0.79	0.04094	0.845	0.24	0.04324	0.902	0.18	0.1843	0.717	0.0026	0.09453	0.974	0.018	1.025	0.383	0.976	0.371	1.049	0.489	0.971	0.0105	1.023	0.467
							exm1555029	rs41284984	-247.038	0.007	GTPBP5	NS	1.367	0.0013	0.0164456	1.119	0.69	0.007929	1.379	0.57	0.01244	>999.999	0.37	0	1.081	0.64	0.03034	1.638	0.0003	0.03718	1.013	0.718	1.052	0.632	0.975	0.773	1.527	0.0512	1.013	0.737	1.009	0.939
							exm1971498	rs151190266	272.781	NA	SLCO4A1	NS	2.127	0.0015	0.00218688	NA	NA	0	>999.999	0.06	0	1.984	0.0047	0.008201	NA	NA	0	NA	NA	0	0.981	0.565	1.115	0.175	0.984	0.846	1.163	0.426	0.985	0.671	1.107	0.23
							exm1554878	NA	-310.671	NA	LSM14B	NS	0.382	0.01	0.00284957	<0.001	0.23	0.000699	<0.001	0.19	0.006203	0.492	0.073	0.007704	<0.001	0.25	0.000384	<0.001	0.21	0.0008918	0.841	0.106	0.553	0.0572	0.946	0.815	0.717	0.645	0.851	0.154	0.507	0.0486
							exm1557758	NA	509.839	NA	DIDO1	NS	>999.999	0.013	0	NA	NA	0	NA	NA	0	NA	NA	0	>999.999	0.26	0	>999.999	0.022	0	0.993	0.689	1.045	0.483	1	0.996	0.906	0.544	0.99	0.59	1.051	0.451
							exm1557396	NA	452.055	NA	COL9A3	NS	<0.001	0.035	0.000397614	NA	NA	0	NA	NA	0	NA	NA	0	<0.001	0.089	0.001152	<0.001	0.21	0.0008918	0.991	0.715	1.095	0.228	1.013	0.837	1.083	0.665	0.992	0.776	1.083	0.319
							exm1556505	rs144350949	-27.035	NA	C20orf151	NS	>999.999	0.037	0	>999.999	0.11	0	NA	NA	0	NA	NA	0	NA	NA	0	>999.999	0.16	0	1.015	0.551	1.12	0.267	1.095	0.128	1.727	0.00577	1.01	0.701	1.026	0.812
							exm1555290	rs115562292	-136.828	NA	ADRM1	NS	1.518	0.072	0.00258449	1.659	0.038	0.007922	NA	NA	0	NA	NA	0	0.775	0.71	0.00192	NA	NA	0	1.023	0.693	1.053	0.418	0.995	0.974	1.132	0.383	1.007	0.908	1.018	0.794
							exm1556360	rs111872483	-52.225	NA	RPS21	NS	6.168	0.073	6.62691e-05	>999.999	0.18	0	NA	NA	0	NA	NA	0	NA	NA	0	4.171	0.21	0.0002973	6.168	0.0728	6.168	0.0728	<0.001	0.806	<0.001	0.806	7.303	0.0445	7.303	0.0445
							exm1556389	NA	-49.119	NA	CABLES2	NS	>999.999	0.073	0	>999.999	0.15	0	NA	NA	0	NA	NA	0	>999.999	0.33	0	NA	NA	0	1.052	0.256	1.095	0.667	1.008	0.943	1.426	0.409	1.051	0.296	1.047	0.838
							exm1556960	rs146138729	370.504	NA	NTSR1	NS	5.85	0.083	6.62691e-05	>999.999	0.19	0	NA	NA	0	NA	NA	0	NA	NA	0	3.853	0.24	0.0002973	1.02	0.746	1.015	0.866	0.862	0.36	0.858	0.498	1.035	0.602	1.025	0.785
							exm1556730	NA	152.26	NA	C20orf166	ST	>999.999	0.092	0	>999.999	0.12	0	NA	NA	0	NA	NA	0	NA	NA	0	NA	NA	0	0.965	0.179	1.075	0.507	0.926	0.228	1.131	0.637	0.975	0.362	1.096	0.424
							exm1554816	rs148774765	-427.735	NA	TAF4	NS	<0.001	0.093	0.000397614	<0.001	0.089	0.001398	NA	NA	0	NA	NA	0	NA	NA	0	NA	NA	0	0.66	0.179	0.66	0.179	0.693	0.616	0.693	0.616	0.593	0.125	0.593	0.125
							exm1556618	rs150122400	24.891	NA	GATA5	NS	5.666	0.099	6.62691e-05	<0.001	0.52	0.000233	NA	NA	0	>999.999	0.17	0	>999.999	0.39	0	>999.999	0.16	0	1.44	0.506	1.44	0.506	<0.001	0.512	<0.001	0.512	1.724	0.317	1.724	0.317
							exm1557073	rs139250449	426.29	NA	OGFR	NS	0.346	0.15	0.00072896	0.348	0.15	0.002563	NA	NA	0	NA	NA	0	NA	NA	0	NA	NA	0	0.989	0.766	1.02	0.869	0.831	0.0492	0.874	0.667	1.009	0.81	1.05	0.701
							exm1554991	rs145888791	-276.996	NA	SS18L1	NS	4.797	0.16	6.62691e-05	>999.999	0.1	0	NA	NA	0	NA	NA	0	NA	NA	0	2.128	0.59	0.0002973	1.025	0.728	1.163	0.561	1.129	0.471	1.651	0.325	1.017	0.819	1.154	0.604
							exm1557500	rs17854409	475.883	0.006	TCFL5	NS	0.947	0.23	0.110471	0.949	0.44	0.1883	0.746	0.14	0.1613	1.034	0.76	0.06685	0.756	0.017	0.07181	1.133	0.23	0.08115	0.957	0.273	0.994	0.963	0.862	0.153	0.642	0.255	0.988	0.779	1.052	0.712
							exm1555269	rs148198284	-148.807	NA	OSBPL2	NS	<0.001	0.24	0.000198807	<0.001	0.22	0.000699	NA	NA	0	NA	NA	0	NA	NA	0	NA	NA	0	0.966	0.764	1.047	0.857	1.301	0.31	0.395	0.342	0.957	0.722	1.105	0.705
							exm1555147	rs145146001	-224.295	NA	HRH3	NS	0.765	0.34	0.00284957	0.794	0.42	0.009553	NA	NA	0	NA	NA	0	0.573	0.65	0.000768	NA	NA	0	0.885	0.601	0.885	0.601	1.188	0.734	1.188	0.734	0.825	0.45	0.825	0.45
							exm1557473	rs148824729	461.423	NA	DPH3P1	NS	1.015	0.91	0.00980782	0.836	0.84	0.000932	1.358	0.83	0.001241	0.888	0.72	0.007952	1.02	0.89	0.04109	3.166	0.086	0.001189	1.015	0.91	NA	NA	0.862	0.635	NA	NA	1.023	0.869	NA	NA
rs6062509	20	62362563	355	31	70	7	exm1558201	rs149322415	-494.781	NA	BIRC7	NS	10.869	0.006	6.62954e-05	NA	NA	0	NA	NA	0	NA	NA	0	NA	NA	0	11.532	0.0043	0.0002973	1.013	0.743	1.329	0.094	0.963	0.713	1.747	0.116	1.013	0.757	1.275	0.182
							exm1972768	rs150926976	131.678	NA	ABHD16B	NS	3.496	0.0062	0.000397614	NA	NA	0	NA	NA	0	3.51	0.0058	0.001491	NA	NA	0	NA	NA	0	1.041	0.391	1.018	0.897	0.925	0.514	1.001	0.997	1.048	0.352	0.972	0.855
							exm1559188	rs6011889	-189.924	0.005	SRMS	NS	0.863	0.0068	0.0933068	0.834	0.0019	0.3036	0.767	0.71	0.01117	0.57	0.17	0.006461	1.337	0.13	0.01997	0.984	0.97	0.005351	1	0.991	1.005	0.952	1.006	0.914	0.942	0.791	1.003	0.883	1.035	0.702
							exm1560292	rs3208008	-36.453	0.556	RTEL1	NS	0.917	0.0092	0.298277	0.893	0.29	0.07409	0.711	0.022	0.3945	0.918	0.13	0.5977	0.895	0.11	0.2377	0.945	0.41	0.25	0.95	0.0715	0.94	0.346	0.925	0.259	1.176	0.271	0.958	0.15	0.922	0.248
							exm1559723	rs79249043	-164.239	NA	PRIC285	NS	>999.999	0.013	0	>999.999	0.011	0	NA	NA	0	NA	NA	0	NA	NA	0	NA	NA	0	0.993	0.547	1.01	0.821	0.989	0.691	1.236	0.037	0.993	0.582	0.991	0.849
							exm1561775	rs143788807	375.407	NA	NPBWR2	NS	>999.999	0.014	0	>999.999	0.016	0	NA	NA	0	NA	NA	0	NA	NA	0	NA	NA	0	1.016	0.707	1.031	0.761	1.069	0.501	1.063	0.8	1.005	0.913	1.049	0.657
							exm1972683	NA	2.09	NA	ZGPAT	NS	2.575	0.016	0.000662691	NA	NA	0	<0.001	0.15	0.003722	4.331	0.00085	0.001491	NA	NA	0	<0.001	0.45	0.0002973	1.018	0.781	1.285	0.0936	0.77	0.125	0.765	0.557	1.049	0.479	1.32	0.0795
							exm1558584	NA	-412.128	NA	COL20A1	NS	<0.001	0.017	0.000530152	<0.001	0.48	0.000233	NA	NA	0	NA	NA	0	<0.001	0.12	0.000768	<0.001	0.099	0.001486	1.016	0.498	1.018	0.784	1.011	0.851	1.01	0.951	1.018	0.45	1.039	0.564
							exm1559162	NA	-193.93	NA	PTK6	NS	>999.999	0.017	0	NA	NA	0	NA	NA	0	NA	NA	0	>999.999	0.058	0	>999.999	0.13	0	1.034	0.743	1.185	0.272	1.108	0.676	1.86	0.0433	1.002	0.987	1.075	0.67
							exm1560667	rs8957	11.144	0.834	SLC2A4RG	NS	0.929	0.022	0.310461	0.956	0.63	0.09459	0.787	0.11	0.3379	0.899	0.056	0.5843	0.908	0.13	0.2742	0.973	0.67	0.28	0.929	0.0175	0.922	0.647	0.93	0.333	0.689	0.459	0.925	0.0168	0.949	0.777
							exm1559959	rs41310203	-135.592	0.033	GMEB2	NS	1.716	0.032	0.00218717	1.678	0.35	0.001631	0.561	0.63	0.004963	NA	NA	0	2.924	0.19	0.000768	1.802	0.065	0.005945	1.627	0.0383	1.627	0.0383	2.478	0.0358	2.478	0.0358	1.511	0.103	1.511	0.103
							exm1558271	rs872808	-483.613	0.002	NKAIN4	NS	0.944	0.037	0.477402	0.901	0.052	0.4662	1.034	0.81	0.438	0.949	0.34	0.5586	0.993	0.9	0.4946	0.909	0.12	0.3906	1.008	0.653	1.115	0.68	0.995	0.913	1.76	0.284	1.008	0.678	1.041	0.889
							exm1561711	rs113199372	367.584	NA	OPRL1	NS	>999.999	0.04	0	>999.999	0.16	0	NA	NA	0	NA	NA	0	NA	NA	0	>999.999	0.14	0	0.843	0.38	0.843	0.38	1.278	0.538	1.278	0.538	0.686	0.0913	0.686	0.0913
							exm1561821	rs117661126	476.395	0.004	MYT1	NS	0.261	0.055	0.0010603	NA	NA	0	<0.001	0.43	0.002481	0.367	0.18	0.002982	NA	NA	0	<0.001	0.28	0.0005945	0.981	0.848	0.933	0.631	0.644	0.142	0.822	0.616	1.034	0.747	0.966	0.822
							exm1558418	rs138744663	-443.538	NA	ARFGAP1	NS	>999.999	0.071	0	>999.999	0.25	0	NA	NA	0	NA	NA	0	NA	NA	0	>999.999	0.17	0	1.119	0.372	1.119	0.372	0.967	0.917	0.967	0.917	1.107	0.449	1.107	0.449
							exm1560911	rs146221163	142.59	0.001	TPD52L2	NS	2.286	0.085	0.000463883	<0.001	0.49	0.000233	NA	NA	0	NA	NA	0	2.171	0.27	0.001152	3.257	0.088	0.0008918	1.289	0.226	1.289	0.226	1.236	0.682	1.236	0.682	1.302	0.231	1.302	0.231
							exm1561187	rs138304383	232.469	NA	ZNF512B	NS	>999.999	0.14	0	>999.999	0.2	0	NA	NA	0	NA	NA	0	>999.999	0.4	0	NA	NA	0	1.01	0.498	1.03	0.76	1.017	0.641	1.08	0.741	1.012	0.443	1.035	0.74
							exm1561443	rs139778757	301.7	0.001	PRPF6	NS	0.472	0.14	0.00112657	0.752	0.63	0.00233	NA	NA	0	NA	NA	0	0.224	0.16	0.001152	<0.001	0.15	0.001189	0.492	0.125	0.492	0.125	<0.001	0.254	<0.001	0.254	0.492	0.155	0.492	0.155
							exm1558684	rs113794453	-381.515	NA	CHRNA4	NS	>999.999	0.16	0	NA	NA	0	NA	NA	0	NA	NA	0	NA	NA	0	>999.999	0.15	0	0.919	0.783	0.919	0.783	0.552	0.547	0.552	0.547	0.838	0.602	0.838	0.602
							exm1559304	rs139859545	-175.168	NA	C20orf195	NS	>999.999	0.17	0	NA	NA	0	NA	NA	0	NA	NA	0	NA	NA	0	>999.999	0.16	0	1.323	0.215	1.323	0.215	1.006	0.992	1.006	0.992	1.398	0.151	1.398	0.151
							exm1972130	rs117067974	-317.036	NA	KCNQ2	NS	1.179	0.2	0.0116634	<0.001	0.34	0.000233	1.409	0.32	0.0335	1.139	0.36	0.03603	1.534	0.78	0.000384	0.955	0.97	0.0005945	1.008	0.772	0.859	0.575	1.022	0.734	1.533	0.402	1.004	0.894	0.704	0.252
							exm1561093	NA	215.244	NA	UCKL1	SP	0.447	0.2	0.000795229	<0.001	0.46	0.000233	NA	NA	0	0.352	0.16	0.002485	>999.999	0.2	0	<0.001	0.43	0.0002973	0.604	0.122	0.604	0.122	0.44	0.406	0.44	0.406	0.468	0.0495	0.468	0.0495
							exm1972737	NA	15.772	NA	ZBTB46	NS	2.324	0.23	0.000198807	NA	NA	0	NA	NA	0	NA	NA	0	2.77	0.2	0.000768	<0.001	0.51	0.0002973	0.964	0.257	1	0.996	0.939	0.428	1.363	0.77	0.961	0.243	1.044	0.937
							exm1560386	rs140998392	-34.135	NA	TNFRSF6B	NS	0.514	0.26	0.000729056	1.25	0.86	0.0004662	<0.001	0.5	0.001241	NA	NA	0	0.53	0.38	0.00192	<0.001	0.21	0.0008918	0.922	0.789	0.922	0.789	1.477	0.499	1.477	0.499	0.831	0.575	0.831	0.575
							exm1559048	rs145566461	-209.428	NA	PPDPF	NS	3.173	0.33	6.62691e-05	NA	NA	0	NA	NA	0	NA	NA	0	>999.999	0.25	0	1.924	0.64	0.0002973	3.173	0.325	3.173	0.325	<0.001	0.812	<0.001	0.812	3.746	0.253	3.746	0.253
							exm1560469	rs139547982	-29.332	NA	ARFRP1	NS	0.568	0.38	0.00072896	1.157	0.84	0.001165	NA	NA	0	<0.001	0.41	0.0002485	NA	NA	0	<0.001	0.13	0.001486	0.989	0.974	0.989	0.974	0.666	0.69	0.666	0.69	0.829	0.636	0.829	0.636
							exm1558956	NA	-242.786	NA	EEF1A2	SP	1.247	0.41	0.00225315	1.431	0.58	0.001398	3.075	0.42	0.001241	NA	NA	0	0.786	0.59	0.004992	1.678	0.19	0.004162	1.247	0.405	1.247	0.405	1.547	0.413	1.547	0.413	1.131	0.67	1.131	0.67
							exm1561546	rs6010714	339.064	0	TCEA2	NS	1.104	0.42	0.0114645	0.97	0.86	0.02283	<0.001	0.25	0.007444	NA	NA	0	1.432	0.11	0.01421	1.196	0.54	0.009512	1.104	0.422	NA	NA	1.103	0.737	NA	NA	1.123	0.37	NA	NA
							exm1561289	rs113166910	244.616	0.012	SAMD10	NS	1.205	0.43	0.00304838	1.104	0.85	0.00233	0.777	0.84	0.003722	NA	NA	0	1.286	0.66	0.002304	1.23	0.51	0.008026	0.999	0.994	0.999	0.994	1.017	0.96	1.017	0.96	0.973	0.857	0.973	0.857
							exm1561608	rs138539292	345.412	0.007	RGS19	NS	0.804	0.53	0.00178926	0.793	0.74	0.001631	NA	NA	0	NA	NA	0	0.682	0.66	0.001536	0.829	0.68	0.004756	0.804	0.532	0.804	0.532	0.587	0.598	0.587	0.598	0.874	0.709	0.874	0.709
							exm1560630	rs1151625	7.434	0.219	LIME1	NS	0.976	0.73	0.0377734	1.217	0.29	0.01817	0.912	0.84	0.0273	0.992	0.97	0.01218	0.908	0.41	0.06567	0.963	0.74	0.07432	0.99	0.869	1.046	0.75	0.796	0.166	0.798	0.567	1.019	0.772	1.077	0.613
rs11704416	22	40436973	112	8	24	2	exm1611260	rs34736200	378.283	NA	MKL1	NS	1.321	0.0017	0.0226037	1.298	0.005	0.07459	2.722	0.45	0.002481	457.175	0.14	0	1.39	0.34	0.005765	0.954	0.96	0.001189	1.054	0.0614	0.932	0.407	1.129	0.0721	1.322	0.121	1.064	0.04	0.914	0.323
							exm1610230	rs58395851	-440.415	0.005	CACNA1I	NS	9.982	0.01	6.62691e-05	>999.999	0.09	0	NA	NA	0	NA	NA	0	NA	NA	0	7.442	0.036	0.0002973	1.037	0.713	1.037	0.713	0.677	0.168	0.677	0.168	1.052	0.626	1.052	0.626
							exm1610611	rs12330063	-21.005	NA	FAM83F	NS	0.692	0.013	0.0110669	0.667	0.0078	0.03798	NA	NA	0	NA	NA	0	1.245	0.75	0.001536	NA	NA	0	0.974	0.438	0.8	0.0227	1.143	0.0975	0.937	0.786	0.954	0.192	0.786	0.0223
							exm1610909	rs148411623	318.028	NA	ADSL	NS	2.037	0.022	0.00132538	2.089	0.019	0.004427	<0.001	0.63	0.001241	NA	NA	0	NA	NA	0	NA	NA	0	0.898	0.344	1.265	0.257	0.896	0.703	0.731	0.6	0.936	0.577	1.395	0.118
							exm1610785	NA	225.816	NA	TNRC6B	NS	>999.999	0.024	0	>999.999	0.03	0	NA	NA	0	NA	NA	0	NA	NA	0	NA	NA	0	0.971	0.614	0.915	0.401	1.096	0.499	0.972	0.912	0.96	0.51	0.906	0.385
							exm1611015	NA	365.142	NA	SGSM3	NS	>999.999	0.063	0	NA	NA	0	>999.999	0.1	0	NA	NA	0	NA	NA	0	NA	NA	0	0.873	0.319	0.873	0.319	1.447	0.174	1.447	0.174	0.81	0.155	0.81	0.155
							exm1610471	rs116668695	-296.792	NA	ENTHD1	NS	0.776	0.18	0.00662691	<0.001	0.46	0.000233	NA	NA	0	0.811	0.28	0.02435	<0.001	0.45	0.000384	NA	NA	0	0.941	0.366	0.814	0.115	1.003	0.983	0.881	0.697	0.939	0.381	0.787	0.0892
							exm1610572	rs149718626	-70.049	NA	GRAP2	NS	<0.001	0.28	0.000132538	<0.001	0.54	0.000233	NA	NA	0	NA	NA	0	NA	NA	0	<0.001	0.43	0.0002973	0.919	0.436	0.959	0.832	1.223	0.409	0.885	0.814	0.897	0.352	0.955	0.829
rs5759167	22	43500212	131	13	40	5	exm1615078	rs34074034	68.3	0.003	TTLL12	NS	0.917	0.014	0.193903	0.915	0.33	0.09879	0.808	0.14	0.3213	0.958	0.52	0.2311	0.893	0.13	0.1909	0.924	0.25	0.2426	0.926	0.00176	1.187	0.379	0.88	0.0356	0.673	0.503	0.937	0.0122	1.311	0.172
							exm1614574	rs147909015	-305.167	NA	ARFGAP3	SP	5.771	0.02	0.000132538	5.28	0.027	0.000466	NA	NA	0	NA	NA	0	NA	NA	0	NA	NA	0	0.977	0.402	0.931	0.371	0.942	0.367	1.06	0.759	0.987	0.649	0.915	0.299
							exm1614855	rs147435458	-28.704	NA	TTLL1	NS	0.241	0.041	0.000994036	0.121	0.015	0.003495	NA	NA	0	NA	NA	0	NA	NA	0	>999.999	0.13	0	0.919	0.607	0.919	0.607	1.192	0.631	1.192	0.631	0.889	0.502	0.889	0.502
							exm1614426	rs28627172	-489.395	0.002	POLDIP3	NS	1.087	0.061	0.110338	1.059	0.35	0.2199	1.694	0.12	0.0397	3.822	0.29	0.0002485	1.091	0.39	0.08641	1.102	0.25	0.1376	1.066	0.142	0.815	0.205	1.129	0.239	0.567	0.213	1.061	0.196	0.861	0.373
							exm1614909	rs77547475	28.849	NA	MCAT	NS	1.205	0.061	0.0188867	1.202	0.069	0.06407	NA	NA	0	NA	NA	0	1.153	0.78	0.002688	0.729	0.8	0.0008918	1.054	0.0452	1.339	0.0968	1.081	0.217	0.873	0.791	1.05	0.0807	1.433	0.0476
							exm1615007	rs41371752	58.76	NA	TSPO	NS	0.938	0.066	0.19894	0.931	0.43	0.09786	0.852	0.26	0.335	0.952	0.44	0.2478	0.944	0.43	0.1905	0.949	0.44	0.2435	0.948	0.0601	0.986	0.971	0.92	0.223	1.034	0.974	0.946	0.0649	0.58	0.279
							exm1615322	NA	118.971	NA	SCUBE1	NS	1.9	0.072	0.000795229	>999.999	0.091	0	NA	NA	0	NA	NA	0	2.137	0.052	0.003456	<0.001	0.23	0.0008918	0.948	0.353	0.93	0.396	0.994	0.964	0.972	0.891	0.948	0.382	0.9	0.247
							exm1615656	rs6006438	579.516	NA	EFCAB6	NS	1.365	0.041	0.00702452	1.323	0.075	0.024	NA	NA	0	NA	NA	0	2.261	0.24	0.001152	>999.999	0.13	0	1.005	0.707	1.062	0.174	0.97	0.374	0.977	0.836	1.01	0.499	1.083	0.0877
							exm1614533	rs145649275	-410.748	NA	A4GALT	NS	0.455	0.15	0.00112762	0.522	0.24	0.003497	NA	NA	0	NA	NA	0	<0.001	0.19	0.0007692	NA	NA	0	1.039	0.192	0.961	0.833	1.228	0.00333	0.736	0.554	1.014	0.651	1.022	0.91
							exm1614715	NA	-225.13	NA	PACSIN2	NS	0.659	0.15	0.0027833	0.544	0.35	0.00233	NA	NA	0	NA	NA	0	0.422	0.13	0.004608	0.952	0.9	0.005945	1	0.995	0.878	0.469	1.013	0.953	0.623	0.356	1.015	0.873	0.939	0.735
							exm1615423	rs182725627	330.846	NA	MPPED1	NS	1.94	0.17	0.000530434	1.836	0.22	0.001865	NA	NA	0	NA	NA	0	>999.999	0.2	0	NA	NA	0	1.94	0.168	1.94	0.168	8.531	4.1e-05	8.531	4.1e-05	1.244	0.704	1.244	0.704
							exm1614860	rs11090143	19.893	0.017	BIK	NS	1.292	0.21	0.00384361	1.648	0.37	0.001631	0.313	0.29	0.007444	NA	NA	0	2.309	0.068	0.002688	1.078	0.78	0.0113	1.299	0.182	1.299	0.182	1.902	0.0815	1.902	0.0815	1.19	0.415	1.19	0.415
							exm1614484	rs144467449	-467.483	NA	CYB5R3	NS	0.586	0.41	0.000662691	0.467	0.49	0.000932	<0.001	0.49	0.002481	NA	NA	0	NA	NA	0	0.959	0.96	0.001189	0.969	0.562	1.001	0.994	1.208	0.136	0.797	0.534	0.951	0.372	1.005	0.971
rs2405942	23	9814135	61	5	27	1	exm1627706	rs61744805	86.451	NA	SHROOM2	NS	1.281	0.014	0.0100604	1.349	0.0049	0.03165	0.731	0.61	0.01198	NA	NA	0	0.929	0.87	0.002574	0.002	0.31	0.001152	1.016	0.435	0.948	0.304	1.05	0.267	0.858	0.23	1.014	0.489	0.956	0.401
							exm1627891	rs41311473	280.08	NA	WWC3	NS	275.11	0.079	0	280.924	0.3	0	NA	NA	0	NA	NA	0	NA	NA	0	431.679	0.17	0	0.965	0.348	0.901	0.141	0.953	0.572	0.951	0.747	0.955	0.247	0.9	0.16
							exm1627482	rs148263276	-120.327	NA	GPR143	NS	1.679	0.19	0.000502892	2.463	0.059	0.0009033	NA	NA	0	NA	NA	0	NA	NA	0	0.003	0.47	0.001152	1.046	0.684	1.046	0.684	0.943	0.827	0.943	0.827	1.053	0.658	1.053	0.658
							exm1627410	rs147021961	-192.499	NA	TBL1X	NS	0.006	0.3	0.000251509	0.004	0.3	0.0009033	NA	NA	0	NA	NA	0	NA	NA	0	NA	NA	0	1.072	0.651	1.072	0.651	1.156	0.646	1.156	0.646	1.073	0.658	1.073	0.658
							exm1628017	rs112652769	366.557	NA	CLCN4	SP	1.343	0.49	0.000502892	1.16	0.75	0.001807	NA	NA	0	NA	NA	0	NA	NA	0	470.655	0.29	0	1.343	0.49	1.343	0.49	0.006	0.613	0.006	0.613	1.472	0.361	1.472	0.361
rs5945572	23	51229683	6	3	0	0	exm1640046	rs147103223	257.107	NA	GSPT2	NS	1.138	0.24	0.00930584	1.095	0.43	0.03252	NA	NA	0	NA	NA	0	2.013	0.16	0.001287	NA	NA	0	1.15	0.203	162.071	0.325	1.442	0.0642		NA	1.1	0.416	179.25	0.276
							exm1640123	rs148038224	410.461	NA	MAGED1	NS	0.553	0.28	0.000754337	0.563	0.3	0.00271	NA	NA	0	NA	NA	0	NA	NA	0	NA	NA	0	0.904	0.533	0.904	0.533	0.908	0.796	0.908	0.796	0.867	0.412	0.867	0.412
							exm1639943	rs143500991	-153.604	NA	NUDT10	NS	0.695	0.54	0.000503018	0.004	0.31	0.0009042	NA	NA	0	NA	NA	0	NA	NA	0	1.07	0.92	0.001152	0.695	0.543	0.695	0.543	0.007	0.646	0.007	0.646	0.749	0.633	0.749	0.633
rs5945619	23	51241672	6	3	0	0	exm1640046	rs147103223	245.118	NA	GSPT2	NS	1.138	0.24	0.00930584	1.095	0.43	0.03252	NA	NA	0	NA	NA	0	2.013	0.16	0.001287	NA	NA	0	1.15	0.203	162.071	0.325	1.442	0.0642		NA	1.1	0.416	179.25	0.276
							exm1640123	rs148038224	398.472	NA	MAGED1	NS	0.553	0.28	0.000754337	0.563	0.3	0.00271	NA	NA	0	NA	NA	0	NA	NA	0	NA	NA	0	0.904	0.533	0.904	0.533	0.908	0.796	0.908	0.796	0.867	0.412	0.867	0.412
							exm1639943	rs143500991	-165.593	NA	NUDT10	NS	0.695	0.54	0.000503018	0.004	0.31	0.0009042	NA	NA	0	NA	NA	0	NA	NA	0	1.07	0.92	0.001152	0.695	0.543	0.695	0.543	0.007	0.646	0.007	0.646	0.749	0.633	0.749	0.633
rs5919432	23	67021550	10	2	3	1	exm1643506	NA	-255.423	NA	AR	NS	0.649	0.14	0.00226301	0.687	0.21	0.007227	NA	NA	0	NA	NA	0	NA	NA	0	0.001	0.12	0.001152	0.705	0.106	0.705	0.106	1.084	0.832	1.084	0.832	0.605	0.0431	0.605	0.0431
							exm1643578	rs139691746	262.248	NA	OPHN1	NS	0.696	0.18	0.00251446	0.691	0.17	0.009033	NA	NA	0	NA	NA	0	NA	NA	0	NA	NA	0	1.015	0.793	0.987	0.913	0.965	0.773	1.007	0.98	1.025	0.664	1.014	0.911
S7.2 High Risk Genes Prostate
		Gene Sum Analysis
		Overall				Advanced				Non-advanced									Single Marker Analysis
		All Variants		Rare Variants		All Variants		Rare Variants		All Variants		Rare Variants							Overall			African American			Native Hawaiian			Japanese American			Latino			European American
Gene	No. of SNPs	OR	P	OR	P	OR	P	OR	P	OR	P	OR	P	SNP ID	rs ID	Chr	Location	Type:AA change	OR	P	MAF	OR	P	MAF	OR	P	MAF	OR	P	MAF	OR	P	MAF	OR	P	MAF
BRCA2	83	1.022	0.292	1.051	0.15	0.963	0.457	0.92	0.374	1.028	0.197	1.059	0.113	exm1061922	rs2227943	13	32911278	NS:L929S	1.547	0.039	0.00344599	1.54	0.045	0.01165	NA	NA	0	NA	NA	0	1.504	0.69	0.000768	NA	NA	0
														exm1061930	rs2227944	13	32911452	NS:N987I	1.547	0.039	0.00344599	1.54	0.045	0.01165	NA	NA	0	NA	NA	0	1.504	0.69	0.000768	NA	NA	0
														exm1062084	rs169547	13	32929387	NS:V2466V	1.206	0.067	0.0180276	1.177	0.12	0.06104	NA	NA	0	NA	NA	0	1.881	0.2	0.002306	1.827	0.36	0.001189
														exm1062043	rs35029074	13	32914815	NS:R2108H	0.565	0.082	0.00258449	0.756	0.44	0.006524	NA	NA	0	NA	NA	0	<0.001	0.049	0.002304	0.373	0.35	0.001486
														exm1062034	rs1799954	13	32914592	NS:R2034C	1.493	0.099	0.00231942	1.905	0.31	0.001165	<0.001	0.39	0.002481	NA	NA	0	1.488	0.26	0.00576	1.624	0.24	0.003864
														exm1062152	rs28897755	13	32953971	NS:T3013I	<0.001	0.1	0.000397614	<0.001	0.49	0.000233	NA	NA	0	<0.001	0.53	0.0002485	NA	NA	0	<0.001	0.15	0.001189
														exm1795019	rs11571831	13	32972380	NS:V3244I	1.302	0.1	0.00616302	1.263	0.16	0.0212	NA	NA	0	NA	NA	0	2.831	0.35	0.000384	3.46	0.3	0.0002973
														exm1062071	rs45574331	13	32929007	NS:K2339N	1.298	0.11	0.00616384	1.248	0.18	0.02144	NA	NA	0	NA	NA	0	2.833	0.35	0.0003843	>999.999	0.088	0
														exm1062119	rs28897749	13	32937521	NS:V2728I	1.811	0.12	0.000927767	1.612	0.6	0.000699	<0.001	0.41	0.001241	NA	NA	0	0.958	0.98	0.000384	2.157	0.089	0.002675
														exm1062049	rs149330893	13	32914920	NS:S2143L	>999.999	0.13	0	NA	NA	0	NA	NA	0	NA	NA	0	NA	NA	0	>999.999	0.16	0
														exm1062037	rs34309943	13	32914712	NS:H2074N	0.62	0.16	0.00218688	0.511	0.072	0.007456	NA	NA	0	NA	NA	0	3.078	0.31	0.000384	NA	NA	0
														exm1061827	rs68071147	13	32900279	NS:D156G	>999.999	0.17	0	>999.999	0.18	0	NA	NA	0	NA	NA	0	NA	NA	0	NA	NA	0
														exm1061884	rs80358451	13	32907277	NS:C554W	>999.999	0.17	0	NA	NA	0	NA	NA	0	>999.999	0.25	0	NA	NA	0	NA	NA	0
														exm1061928	rs11571656	13	32911419	NS:S976F	>999.999	0.17	0	>999.999	0.19	0	NA	NA	0	NA	NA	0	NA	NA	0	NA	NA	0
														exm1062024	rs79538375	13	32914277	NS:I1929V	0.694	0.18	0.00344782	NA	NA	0	<0.001	0.59	0.002481	0.724	0.24	0.01195	<0.001	0.31	0.000384	<0.001	0.49	0.0002973
														exm1061996	rs80358755	13	32913804	NS:G1771D	4.383	0.19	6.64187e-05	2.002	0.62	0.0002331	NA	NA	0	NA	NA	0	NA	NA	0	>999.999	0.15	0
														exm1062081	rs4986860	13	32929309	NS:H2440R	1.202	0.21	0.00788602	1.156	0.34	0.02749	NA	NA	0	NA	NA	0	2.831	0.35	0.000384	>999.999	0.088	0
														exm2221587	rs11571653	13	32910842	NS:M784V	1.111	0.22	0.0286945	NA	NA	0	1.678	0.49	0.007444	1.135	0.15	0.1059	NA	NA	0	<0.001	0.46	0.0002973
														exm1062041	rs56172926	13	32914809	NS:L2106P	<0.001	0.22	0.000132538	NA	NA	0	NA	NA	0	NA	NA	0	<0.001	0.19	0.000384	<0.001	0.5	0.0002973
														exm1794920	rs79483201	13	32906558	NS:C315S	<0.001	0.23	0.000198807	NA	NA	0	NA	NA	0	<0.001	0.23	0.0007455	NA	NA	0	NA	NA	0
														exm1062026	rs56157628	13	32914371	NS:C1960Y	2.834	0.23	0.000132538	2.73	0.25	0.000466	NA	NA	0	NA	NA	0	NA	NA	0	NA	NA	0
														exm1062009	rs80358777	13	32914046	NS:V1852I	>999.999	0.24	0	NA	NA	0	NA	NA	0	NA	NA	0	>999.999	0.23	0	NA	NA	0
														exm1062144	rs59004709	13	32953604	NS:V2969M	2.681	0.26	0.000132538	1.033	0.98	0.000466	NA	NA	0	NA	NA	0	>999.999	0.22	0	>999.999	0.17	0
														exm1061853	rs28897706	13	32906593	NS:S326R	2.156	0.27	0.000265076	NA	NA	0	<0.001	0.34	0.002481	NA	NA	0	NA	NA	0	3.888	0.092	0.0005945
														exm1794923	rs80358457	13	32907359	NS:T582P	0.581	0.29	0.000994036	NA	NA	0	NA	NA	0	0.578	0.29	0.003728	NA	NA	0	NA	NA	0
														exm1061964	rs28897727	13	32912750	NS:D1420Y	0.707	0.29	0.00231942	0.92	0.89	0.002097	<0.001	0.62	0.001241	NA	NA	0	0.994	1	0.000768	0.587	0.21	0.006837
														exm1061972	rs28897728	13	32913077	NS:G1529R	0.445	0.3	0.000463945	<0.001	0.55	0.000233	NA	NA	0	<0.001	0.53	0.0002486	0.473	0.51	0.001152	1.015	0.99	0.0005945
														exm1061891	rs28897710	13	32907407	NS:T598A	0.573	0.34	0.00072896	<0.001	0.52	0.000233	NA	NA	0	NA	NA	0	0.76	0.77	0.001152	0.537	0.43	0.002081
														exm1062181	rs55847618	13	32972420	NS:K3257R	0.371	0.34	0.000397614	0.444	0.45	0.001165	NA	NA	0	NA	NA	0	<0.001	0.46	0.000384	NA	NA	0
														exm1061956	rs41293485	13	32912361	NS:C1290Y	0.779	0.36	0.00304918	0.767	0.34	0.01048	NA	NA	0	NA	NA	0	0.958	0.98	0.0003843	NA	NA	0
														exm1062092	rs28897744	13	32930673	NS:T2515I	3.41	0.36	6.62778e-05	<0.001	0.61	0.0002331	NA	NA	0	NA	NA	0	NA	NA	0	>999.999	0.14	0
														exm1062201	rs55853199	13	32972852	NS:T3401M	<0.001	0.38	6.62691e-05	NA	NA	0	NA	NA	0	NA	NA	0	<0.001	0.47	0.000384	NA	NA	0
														exm2221593	rs79456940	13	32914817	NS:V2109I	1.28	0.39	0.00212061	NA	NA	0	<0.001	0.72	0.001241	1.294	0.39	0.007704	NA	NA	0	>999.999	0.12	0
														exm1062065	rs55712212	13	32915313	NS:G2274V	<0.001	0.39	6.62691e-05	NA	NA	0	NA	NA	0	NA	NA	0	NA	NA	0	<0.001	0.43	0.0002973
														exm1061809	rs56091799	13	32893321	NS:P59A	0.668	0.4	0.00106157	0.635	0.38	0.003495	NA	NA	0	NA	NA	0	<0.001	0.31	0.0003849	>999.999	0.22	0
														exm1061931	rs1799944	13	32911463	NS:N991D	0.955	0.4	0.070851	1.003	0.98	0.04031	0.529	0.077	0.04839	0.937	0.43	0.1327	1.077	0.51	0.06989	0.836	0.25	0.04194
														exm2276291	rs28897716	13	32911295	NS:D935N	1.461	0.42	0.000662691	<0.001	0.15	0.000932	NA	NA	0	NA	NA	0	3.095	0.15	0.000768	1.659	0.51	0.001189
														exm1062109	rs28897745	13	32937333	NS:D2665G	<0.001	0.42	6.62691e-05	NA	NA	0	NA	NA	0	NA	NA	0	NA	NA	0	<0.001	0.45	0.0002973
														exm1062018	rs4987048	13	32914196	NS:D1902N	1.151	0.43	0.00563362	1.132	0.5	0.01957	NA	NA	0	NA	NA	0	3.097	0.31	0.000384	NA	NA	0
														exm1062042	rs55794205	13	32914814	NS:R2108C	0.536	0.43	0.000463883	NA	NA	0	<0.001	0.18	0.003722	0.962	0.97	0.000497	<0.001	0.2	0.000384	2.002	0.62	0.0002973
														exm1062140	rs28897754	13	32953549	NS:K2950N	1.412	0.43	0.00072896	NA	NA	0	<0.001	0.64	0.001241	NA	NA	0	1.087	0.88	0.002688	2.643	0.19	0.0008918
														exm1062195	rs56309455	13	32972771	NS:T3374I	0.619	0.46	0.000662691	0.568	0.39	0.00233	NA	NA	0	NA	NA	0	NA	NA	0	NA	NA	0
														exm1061946	rs80358589	13	32911937	NS:M1149V	1.995	0.48	0.000132538	1.9	0.52	0.000466	NA	NA	0	NA	NA	0	NA	NA	0	NA	NA	0
														exm1062013	rs55996097	13	32914127	NS:E1879K	<0.001	0.52	6.62691e-05	NA	NA	0	NA	NA	0	NA	NA	0	NA	NA	0	<0.001	0.49	0.0002973
														exm1062045	rs55953736	13	32914839	NS:H2116R	1.166	0.53	0.00291623	1.408	0.21	0.007689	<0.001	0.34	0.001241	NA	NA	0	0.547	0.32	0.003459	2.178	0.58	0.0002973
														exm1062139	rs4987047	13	32953529	NS:I2944F	0.925	0.56	0.0119427	0.958	0.75	0.04033	<0.001	0.58	0.001241	<0.001	0.48	0.0002495	0.29	0.26	0.001152	<0.001	0.27	0.0005945
														exm1061913	rs55968715	13	32910812	NS:T774A	<0.001	0.57	6.62691e-05	NA	NA	0	NA	NA	0	NA	NA	0	NA	NA	0	<0.001	0.51	0.0002973
														exm1061873	rs56403624	13	32907000	NS:E462G	2.161	0.58	6.62691e-05	NA	NA	0	NA	NA	0	NA	NA	0	NA	NA	0	1.899	0.65	0.0002973
														exm1061892	rs120074210	13	32907413	NS:Y600H	0.825	0.58	0.00178926	0.881	0.72	0.006058	NA	NA	0	NA	NA	0	<0.001	0.36	0.000384	NA	NA	0
														exm1061889	rs56328701	13	32907401	NS:D596H	0.534	0.59	0.000198807	<0.001	0.4	0.000233	NA	NA	0	NA	NA	0	>999.999	0.43	0	<0.001	0.34	0.0005945
														exm1061900	rs28897712	13	32910456	NS:P655R	1.549	0.59	0.000198807	NA	NA	0	NA	NA	0	NA	NA	0	>999.999	0.28	0	1.144	0.88	0.0008918
														exm1061962	rs55969723	13	32912679	NS:Q1396R	1.235	0.59	0.00112657	1.236	0.59	0.003961	NA	NA	0	NA	NA	0	NA	NA	0	NA	NA	0
														exm1062014	rs11571657	13	32914132	NS:N1880K	0.874	0.59	0.00311465	0.669	0.19	0.009553	NA	NA	0	NA	NA	0	2.979	0.059	0.001536	<0.001	0.3	0.0005945
														exm1061993	rs55639415	13	32913690	NS:S1733F	1.257	0.62	0.000795334	1.06	0.9	0.002797	>999.999	0.12	0	NA	NA	0	NA	NA	0	NA	NA	0
														exm1062120	rs80359065	13	32937526	NS:K2729N	1.121	0.62	0.00344599	>999.999	0.23	0	<0.001	0.37	0.001241	1.11	0.66	0.01243	NA	NA	0	<0.001	0.52	0.0002973
														exm1062160	rs55933907	13	32954261	NS:V3079I	0.749	0.63	0.000662691	0.739	0.61	0.00233	NA	NA	0	NA	NA	0	NA	NA	0	NA	NA	0
														exm1062179	rs55775473	13	32971167	NS:G3212R	0.837	0.63	0.00152419	0.766	0.49	0.005359	NA	NA	0	NA	NA	0	>999.999	0.48	0	NA	NA	0
														exm1061863	rs41293475	13	32906766	NS:S384F	1.252	0.65	0.000662691	>999.999	0.1	0	NA	NA	0	NA	NA	0	0.699	0.77	0.000768	1.183	0.77	0.002378
														exm1061898	rs11571652	13	32910403	SP	0.815	0.65	0.00106031	0.962	0.93	0.003262	NA	NA	0	NA	NA	0	<0.001	0.14	0.000768	NA	NA	0
														exm1062166	rs56204128	13	32968922	NS:M3118T	1.893	0.65	6.62691e-05	1.984	0.63	0.000233	NA	NA	0	NA	NA	0	NA	NA	0	NA	NA	0
														exm1061963	rs70953664	13	32912733	NS:T1414M	0.884	0.66	0.00265076	0.888	0.68	0.008854	NA	NA	0	<0.001	0.53	0.0002485	1.848	0.61	0.000384	NA	NA	0
														exm1062190	rs11571833	13	32972626	ST:K3326X	0.895	0.66	0.0031163	0.791	0.78	0.001165	<0.001	0.35	0.003722	NA	NA	0	0.872	0.78	0.00384	1.005	0.99	0.008621
														exm1062089	rs11571707	13	32930598	NS:I2490T	1.042	0.67	0.0168323	1.714	0.23	0.002563	<0.001	0.38	0.003722	2.11	0.32	0.0007455	1.02	0.85	0.08679	0.867	0.82	0.00327
														exm1061975	rs2219594	13	32913173	NS:H1561N	1.128	0.7	0.00178926	1.244	0.5	0.005592	NA	NA	0	NA	NA	0	0.616	0.7	0.000768	<0.001	0.44	0.0002973
														exm1062141	rs11571769	13	32953550	NS:A2951T	1.053	0.73	0.00649437	0.728	0.69	0.001631	0.607	0.67	0.003722	NA	NA	0	1.149	0.42	0.02573	0.82	0.62	0.006243
														exm2221592	rs56191579	13	32914623	NS:G2044V	1.109	0.74	0.00198833	NA	NA	0	<0.001	0.65	0.001241	1.147	0.66	0.00721	NA	NA	0	NA	NA	0
														exm1062064	rs80358906	13	32915295	NS:R2268K	1.278	0.75	0.000265076	1.316	0.72	0.000932	NA	NA	0	NA	NA	0	NA	NA	0	NA	NA	0
														exm1062165	rs41293521	13	32968861	NS:Y3098H	1.382	0.75	0.000132538	NA	NA	0	NA	NA	0	NA	NA	0	0.62	0.7	0.000768	>999.999	0.16	0
														exm1062132	rs11571747	13	32945172	NS:E2856A	0.868	0.77	0.00092789	1.287	0.78	0.000699	NA	NA	0	NA	NA	0	NA	NA	0	0.741	0.61	0.00327
														exm1061861	rs144848	13	32906729	NS:N372H	0.992	0.8	0.227821	1.045	0.56	0.1421	0.723	0.028	0.3491	1.095	0.18	0.2007	0.944	0.37	0.2922	0.965	0.58	0.2907
														exm1062116	rs28897747	13	32937488	NS:A2717S	1.154	0.8	0.000530152	2.097	0.45	0.000466	NA	NA	0	NA	NA	0	>999.999	0.24	0	0.61	0.54	0.001784
														exm1061881	rs28897708	13	32907129	NS:I505T	0.814	0.81	0.000331389	>999.999	0.13	0	>999.999	0.14	0	NA	NA	0	<0.001	0.41	0.000384	<0.001	0.16	0.001189
														exm1062047	rs11571659	13	32914904	NS:V2138F	1.069	0.81	0.00231942	1.251	0.44	0.00699	NA	NA	0	NA	NA	0	0.336	0.31	0.001536	<0.001	0.44	0.0002973
														exm1062090	rs55716624	13	32930633	NS:R2502C	0.901	0.82	0.00106031	0.998	1	0.003262	<0.001	0.47	0.002481	NA	NA	0	NA	NA	0	NA	NA	0
														exm1061808	rs4987046	13	32893271	NS:Y42C	1.108	0.84	0.000662691	0.844	0.89	0.000466	NA	NA	0	NA	NA	0	0.624	0.64	0.000768	1.332	0.66	0.001784
														exm1062023	rs45491005	13	32914260	NS:D1923A	1.122	0.84	0.000530152	1.158	0.8	0.001864	NA	NA	0	NA	NA	0	NA	NA	0	NA	NA	0
														exm1062077	rs55977008	13	32929140	NS:Q2384K	1.07	0.85	0.00152419	1.045	0.9	0.005359	NA	NA	0	NA	NA	0	NA	NA	0	NA	NA	0
														exm1061947	rs80358600	13	32912007	NS:S1172L	0.811	0.87	0.000132556	NA	NA	0	>999.999	0.043	0	NA	NA	0	<0.001	0.27	0.000384	<0.001	0.47	0.0002973
														exm1061859	rs55800493	13	32906655	NS:Q347R	0.935	0.88	0.00106031	1.093	0.84	0.003262	NA	NA	0	NA	NA	0	<0.001	0.14	0.000768	NA	NA	0
														exm1062203	rs1801426	13	32972884	NS:I3412V	1.009	0.89	0.0451292	1.033	0.72	0.0925	0.734	0.56	0.01861	0.759	0.18	0.02063	1.06	0.61	0.06528	1.152	0.73	0.004756
														exm1061960	rs56248502	13	32912582	NS:I1364L	0.974	0.9	0.00483828	0.913	0.66	0.01678	<0.001	0.6	0.001241	NA	NA	0	>999.999	0.11	0	NA	NA	0
														exm1062021	rs4987117	13	32914236	NS:T1915M	1.016	0.9	0.010603	0.605	0.099	0.01095	2.092	0.35	0.004963	NA	NA	0	1.486	0.19	0.006912	1.042	0.82	0.02705
														exm1794978	rs74047012	13	32930730	NS:A2534V	1.077	0.95	0.000132538	1.926	0.64	0.000233	<0.001	0.59	0.001241	NA	NA	0	NA	NA	0	NA	NA	0
ELAC2	9	1.012	0.683	1.671	0.0261	1.003	0.971	1.7	0.314	1.002	0.941	1.718	0.0241	exm1296518	rs149544601	17	12905790	NS:I356V	14.028	0.0014	6.62691e-05	11.845	0.004	0.000233	NA	NA	0	NA	NA	0	NA	NA	0	>999.999	0.15	0
														exm1296453	rs119484086	17	12896274	NS:R741H	2.73	0.16	0.000198807	>999.999	0.15	0	NA	NA	0	NA	NA	0	2.294	0.49	0.000384	1.961	0.5	0.0005945
														exm1296447	rs147779718	17	12896212	NS:G762S	>999.999	0.19	0	NA	NA	0	NA	NA	0	>999.999	0.19	0	NA	NA	0	NA	NA	0
														exm1296477	rs119484087	17	12898323	NS:E582V	<0.001	0.2	0.000198807	<0.001	0.46	0.000233	NA	NA	0	NA	NA	0	NA	NA	0	<0.001	0.31	0.0005945
														exm1296488	rs5030739	17	12899902	NS:A501T	1.117	0.26	0.0174973	2.133	0.0043	0.006757	0.801	0.68	0.01737	0.525	0.42	0.00174	0.98	0.9	0.03648	1.108	0.5	0.03537
														exm1296541	rs149733287	17	12915101	SP	1.302	0.35	0.00205434	1.399	0.24	0.006757	<0.001	0.62	0.001241	NA	NA	0	NA	NA	0	<0.001	0.39	0.0002973
														exm1296472	rs149561185	17	12898186	NS:V602M	2.539	0.44	6.62691e-05	<0.001	0.5	0.000233	NA	NA	0	NA	NA	0	>999.999	0.2	0	NA	NA	0
														exm1296501	rs149210630	17	12901781	NS:S450A	<0.001	0.44	6.62691e-05	NA	NA	0	NA	NA	0	NA	NA	0	<0.001	0.52	0.000384	NA	NA	0
														exm1296536	rs4792311	17	12915009	NS:S217L	0.991	0.8	0.198303	1.088	0.17	0.2416	0.907	0.69	0.103	0.816	0.2	0.03579	0.939	0.33	0.278	0.999	0.98	0.2986
HOXB13	2	1.274	0.621	1.274	0.621	1.478	0.708	1.478	0.708	1.291	0.619	1.291	0.619	exm1333749	rs139475791	17	46804358	NS:R217C	<0.001	0.2	0.000132538	NA	NA	0	NA	NA	0	NA	NA	0	<0.001	0.24	0.000384	<0.001	0.46	0.0002973
														exm2226624	NA	17	46804175	NS:V278L	1.662	0.31	0.000596422	NA	NA	0	<0.001	0.44	0.002481	2.13	0.16	0.00174	NA	NA	0	NA	NA	0
MSR1	22	1.003	0.929	1.076	0.42	1.044	0.601	1.372	0.104	0.993	0.838	1.024	0.81	exm684036	rs33912200	8	16035502	SP	2.417	0.034	0.000596422	2.635	0.48	0.000233	NA	NA	0	NA	NA	0	2.044	0.23	0.001536	2.414	0.18	0.001189
														exm683999	rs76147566	8	16026115	NS:T161N	<0.001	0.15	0.000265076	<0.001	0.33	0.000466	<0.001	0.53	0.002481	NA	NA	0	NA	NA	0	NA	NA	0
														exm684016	rs143658676	8	16032710	NS:I68T	>999.999	0.15	0	NA	NA	0	NA	NA	0	NA	NA	0	NA	NA	0	>999.999	0.14	0
														exm684027	rs142585229	8	16032808	SP	0.465	0.16	0.000994168	0.539	0.28	0.003029	NA	NA	0	NA	NA	0	<0.001	0.47	0.000384	<0.001	0.43	0.0002974
														exm683973	rs41440349	8	16012590	NS:G294E	2.493	0.17	0.000265076	>999.999	0.16	0	<0.001	0.65	0.001241	NA	NA	0	1.36	0.83	0.000384	3.069	0.2	0.0005945
														exm683996	rs113250199	8	16026056	NS:I181V	1.819	0.23	0.000530152	1.834	0.22	0.001864	NA	NA	0	NA	NA	0	NA	NA	0	NA	NA	0
														exm683977	rs73665227	8	16012615	NS:P286T	1.619	0.25	0.000795439	1.46	0.38	0.002796	NA	NA	0	NA	NA	0	NA	NA	0	>999.999	0.18	0
														exm684032	rs149258734	8	16035421	NS:R26H	<0.001	0.26	0.000132538	NA	NA	0	NA	NA	0	NA	NA	0	<0.001	0.4	0.000384	<0.001	0.47	0.0002973
														exm684025	rs145597376	8	16032791	NS:S41Y	0.428	0.27	0.000530152	0.45	0.3	0.001864	NA	NA	0	NA	NA	0	NA	NA	0	NA	NA	0
														exm683970	rs142534680	8	16007800	NS:D307Y	<0.001	0.32	0.000132573	<0.001	0.53	0.0002331	NA	NA	0	NA	NA	0	NA	NA	0	<0.001	0.47	0.0002973
														exm683933	rs138749399	8	15967628	NS:H378R	0.638	0.35	0.000995355	0.388	0.37	0.001165	>999.999	0.1	0	NA	NA	0	0.905	0.9	0.001537	0.317	0.26	0.001784
														exm684007	rs149818618	8	16026243	NS:M118I	1.756	0.37	0.000331345	2.335	0.2	0.000932	NA	NA	0	NA	NA	0	NA	NA	0	<0.001	0.39	0.0002973
														exm684021	rs137879156	8	16032753	NS:I54V	0.587	0.37	0.000662691	0.701	0.76	0.000699	NA	NA	0	NA	NA	0	0.407	0.27	0.00192	1.111	0.93	0.0005945
														exm684000	rs147742122	8	16026131	NS:L156F	<0.001	0.43	6.62691e-05	<0.001	0.46	0.000233	NA	NA	0	NA	NA	0	NA	NA	0	NA	NA	0
														exm683975	rs41341748	8	16012594	ST:R293X	1.13	0.46	0.00596422	2.332	0.062	0.002097	0.746	0.8	0.004963	NA	NA	0	0.852	0.5	0.01651	1.403	0.21	0.01011
														exm683978	rs141804459	8	16012620	NS:R284Q	1.644	0.46	0.000331345	NA	NA	0	NA	NA	0	1.735	0.42	0.001243	NA	NA	0	NA	NA	0
														exm684026	rs138109437	8	16032804	NS:K37E	0.547	0.58	0.000265076	0.554	0.59	0.000932	NA	NA	0	NA	NA	0	NA	NA	0	NA	NA	0
														exm683997	rs72552387	8	16026077	NS:D174Y	1.097	0.61	0.00550033	1.104	0.6	0.01864	NA	NA	0	NA	NA	0	0.975	0.98	0.000768	3.614	0.27	0.0002973
														exm2167360	rs150131889	8	16035394	SP	0.755	0.63	0.000662691	0.737	0.61	0.00233	NA	NA	0	NA	NA	0	NA	NA	0	NA	NA	0
														exm684009	rs117359034	8	16026259	NS:V113A	0.827	0.78	0.000530152	0.603	0.65	0.000932	>999.999	0.14	0	NA	NA	0	1.138	0.93	0.000384	<0.001	0.23	0.0008918
														exm684030	rs143927568	8	16035410	NS:A30T	0.734	0.79	0.000198807	0.767	0.82	0.000699	NA	NA	0	NA	NA	0	NA	NA	0	NA	NA	0
														exm683982	rs3747531	8	16012648	NS:P275A	0.992	0.82	0.195122	0.999	0.99	0.07925	1.133	0.43	0.2543	0.97	0.59	0.4182	0.992	0.91	0.1943	1.058	0.65	0.06243
RNASEL	21	1.006	0.828	1.264	0.0236	1.09	0.223	1.402	0.132	1.002	0.958	1.301	0.0157	exm129256	rs74315364	1	182555149	ST:E265X	2.505	0.012	0.000795229	5.946	0.081	0.000233	NA	NA	0	NA	NA	0	3.151	0.15	0.000768	1.923	0.16	0.002675
														exm129286	rs151296858	1	182555767	NS:G59S	2.505	0.012	0.000795229	5.946	0.081	0.000233	NA	NA	0	NA	NA	0	3.151	0.15	0.000768	1.923	0.16	0.002675
														exm129199	rs138978618	1	182544687	NS:S689F	2.003	0.093	0.00072896	2.028	0.087	0.002563	NA	NA	0	NA	NA	0	NA	NA	0	NA	NA	0
														exm1740268	rs117790439	1	182550360	SP	1.479	0.1	0.00265076	NA	NA	0	0.767	0.82	0.004963	1.499	0.1	0.008946	NA	NA	0	NA	NA	0
														exm129242	rs137993708	1	182554743	NS:R400P	3.413	0.12	0.000132538	<0.001	0.48	0.000233	NA	NA	0	NA	NA	0	>999.999	0.081	0	3.507	0.28	0.0002973
														exm129204	rs149964724	1	182550385	NS:K627R	3.328	0.15	0.000132538	NA	NA	0	NA	NA	0	NA	NA	0	>999.999	0.12	0	1.947	0.5	0.0005945
														exm129276	rs115634589	1	182555640	NS:I101T	4.635	0.18	6.62691e-05	<0.001	0.61	0.000233	NA	NA	0	NA	NA	0	NA	NA	0	>999.999	0.055	0
														exm129212	rs147890567	1	182550481	NS:T595M	0.27	0.19	0.000463883	NA	NA	0	NA	NA	0	<0.001	0.062	0.00174	>999.999	0.24	0	NA	NA	0
														exm1740259	NA	1	182545436	NS:F665C	0.407	0.27	0.000331389	NA	NA	0	NA	NA	0	NA	NA	0	0.382	0.24	0.00192	NA	NA	0
														exm129239	rs183399204	1	182554708	NS:R412G	0.609	0.37	0.000662691	<0.001	0.51	0.000233	NA	NA	0	NA	NA	0	0.5	0.25	0.003456	>999.999	0.15	0
														exm129240	rs145787003	1	182554725	NS:S406F	<0.001	0.49	6.62691e-05	<0.001	0.51	0.000233	NA	NA	0	NA	NA	0	NA	NA	0	NA	NA	0
														exm1740290	rs113469614	1	182555747	NS:N65N	<0.001	0.53	6.62691e-05	NA	NA	0	<0.001	0.6	0.001241	NA	NA	0	NA	NA	0	NA	NA	0
														exm129215	rs143649586	1	182551266	NS:R565H	1.396	0.55	0.000463883	1.473	0.49	0.001631	NA	NA	0	NA	NA	0	NA	NA	0	NA	NA	0
														exm129205	rs147610466	1	182550418	NS:R616T	0.561	0.61	0.000198807	0.563	0.61	0.000699	NA	NA	0	NA	NA	0	NA	NA	0	NA	NA	0
														exm129278	rs56250729	1	182555653	NS:I97L	0.913	0.69	0.0038436	0.643	0.31	0.00466	0.611	0.7	0.002481	NA	NA	0	2.539	0.24	0.000768	0.893	0.71	0.01011
														exm129232	rs486907	1	182554557	NS:R462Q	0.991	0.79	0.223923	1.054	0.49	0.1428	1.07	0.67	0.2667	0.988	0.86	0.2063	0.946	0.45	0.2005	0.969	0.61	0.3564
														exm129252	rs143544690	1	182555062	NS:K294K	0.747	0.81	0.000132714	<0.001	0.5	0.0002336	NA	NA	0	NA	NA	0	1.232	0.88	0.0003843	NA	NA	0
														exm129257	rs143565946	1	182555169	NS:L258H	0.856	0.82	0.000464376	0.841	0.84	0.001165	NA	NA	0	NA	NA	0	1.593	0.74	0.000384	<0.001	0.51	0.0002973
														exm129222	rs627928	1	182551337	NS:D541D	0.995	0.85	0.473949	1.021	0.71	0.6584	0.947	0.7	0.3561	0.976	0.69	0.296	1.002	0.97	0.5311	0.985	0.8	0.4354
														exm129221	rs141087868	1	182551329	NS:A544D	1.154	0.88	0.000198807	1.886	0.52	0.000466	NA	NA	0	NA	NA	0	<0.001	0.35	0.000384	NA	NA	0
														exm2273725	NA	1	182555709	NS:L78P	1	1	0.000132538	NA	NA	0	NA	NA	0	1.228	0.87	0.000497	NA	NA	0	NA	NA	0
