# Supplementary material for: Genome-Wide Testing of Putative Functional Exonic Variants in Relationship with Breast and Prostate Cancer Risk in a Multiethnic Population
Source: PLoS Genet. 2013 Mar 28;9(3):e1003419. doi: 10.1371/journal.pgen.1003419 (PMC3610631; doi:10.1371/journal.pgen.1003419)
Supplement: Table S8 — Summary statistics for other phenotypes examined: BMI, alcohol intake, and PSA. (XLSX) [file pgen.1003419.s010.xlsx]

## Sheet: Sheet1
Supplemental Table S8: Other Phenotypes Examined
	All Groups	European Americans	African Americans	Latinos	Japanese Americans	Native Hawaiians
Other Phenotypes
BMI (n, median[range] (kg/m2))	14839, 25.9 [15,50]	3305, 25.5 [15,50]	3822, 27.4 [15,49]	3098, 27.0 [17,50]	3834, 24.3 [15,49]	780, 27.7 [17,49]
Alcohol intake (n ever/n never, median[range] (grams/day))	7767/6721, 7.3 [0.2,457]	2243/972, 11.6 [0.4,392]	1861/1873, 5.9 [0.2,393]	1750/1276, 6.5 [0.4,457]	1557/2185, 5.5 [0.4,325]	356/415, 7.0 [0.4,199]
Total PSA (n, median[range] (ng/mL))	2826, 2.3 [0.05,250]	526, 2.4 [0.05,82]	759, 2.2 [0.13,250]	632, 2.2 [0.05,102]	773, 2.4 [0.05.250]	136, 2.1 [0.06,91]
Free to Total PSA Ratio (n, median[range] (%))	2230, 25.2 [5,83]	452, 25.4 [7,83]	603, 26.2 [5,72]	442, 24.6 [5,77]	667, 25.2 [5,77]	66, 21.1 [7,76]
