# Supplementary material for: Genome-Wide Testing of Putative Functional Exonic Variants in Relationship with Breast and Prostate Cancer Risk in a Multiethnic Population
Source: PLoS Genet. 2013 Mar 28;9(3):e1003419. doi: 10.1371/journal.pgen.1003419 (PMC3610631; doi:10.1371/journal.pgen.1003419)
Supplement: Table S9 — Most significant single SNP association results for other phenotypes examined. (XLSX) [file pgen.1003419.s011.xlsx]

## Sheet: Sheet1
Supplemental Table S9: Most Significant Single SNP Association Results for Other Phenotypes Examined
BMI
							Overall				African American				Native Hawaiian				Japanese American				Latino				European American
SNP	Chr	Position	SNP ID	A1/A2	Gene	Type	No. of samples	MAF	BETA	P	No. of samples	MAF	BETA	P	No. of samples	MAF	BETA	P	No. of samples	MAF	BETA	P	No. of samples	MAF	BETA	P	No. of samples	MAF	BETA	P
exm-rs1421085	16	53800954	rs1421085	C/T	FTO	other/GWAS	14837	0.240683	0.43	3.674e-12	3822	0.1214	0.3333	0.05633	780	0.2237	0.506	0.1256	3833	0.1986	0.3887	8.752e-05	3098	0.2637	0.4511	0.0003996	3304	0.4098	0.4241	0.0001328
exm-rs1558902	16	53803574	rs1558902	A/T	FTO	other/GWAS	14832	0.240764	0.4275	4.958e-12	3819	0.1215	0.3299	0.05899	780	0.2237	0.506	0.1256	3832	0.1985	0.39	8.424e-05	3097	0.2638	0.449	0.0004268	3304	0.41	0.4206	0.0001501
exm345835	3	125313552	rs146199292	T/G	OSBPL11	NS	14837	6.739e-05	19.89	1.163e-10	3822	0.0001308	17.23	0.0003523	780	0	NA	NA	3833	0	NA	NA	3098	0.0001614	22.22	3.033e-07	3304	0	NA	NA
exm192930	2	48809144	rs149954327	G/T	STON1-GTF2A1L	NS	14837	0.000101085	15.24	1.525e-09	3822	0.0003925	14.6	1.547e-07	780	0	NA	NA	3833	0	NA	NA	3098	0	NA	NA	3304	0	NA	NA
exm-rs9941349	16	53825488	rs9941349	T/C	FTO	other/GWAS	14836	0.277059	0.341	4.965e-09	3822	0.194	0.1851	0.1924	780	0.2436	0.3489	0.2841	3833	0.2278	0.2496	0.008313	3097	0.3009	0.4222	0.0005265	3304	0.4157	0.4117	0.0002084
exm-rs17817449	16	53813367	rs17817449	G/T	FTO	other/GWAS	14836	0.311228	0.3162	1.679e-08	3821	0.3892	0.105	0.353	780	0.225	0.4778	0.1453	3833	0.1995	0.3746	0.0001532	3098	0.2758	0.4344	0.000505	3304	0.4042	0.3614	0.001192
exm659030	7	133886309	rs146922831	T/G	LRGUK	NS	14837	0.000235865	9.153	3.013e-08	3822	0.0009158	8.77	1.49e-06	780	0	NA	NA	3833	0	NA	NA	3098	0	NA	NA	3304	0	NA	NA
exm740175	9	14859401	NA	A/C	FREM1	NS	14837	3.3695e-05	23.95	4.148e-08	3822	0	NA	NA	780	0	NA	NA	3833	0.0001304	23.76	8.688e-12	3098	0	NA	NA	3304	0	NA	NA
exm-rs9939609	16	53820527	rs9939609	A/T	FTO	other/GWAS	14837	0.334456	0.303	5.253e-08	3822	0.4708	0.06671	0.549	780	0.2256	0.5118	0.1191	3833	0.2015	0.3721	0.0001619	3098	0.2831	0.4352	0.0004445	3304	0.4048	0.3594	0.001288
exm-rs8050136	16	53816275	rs8050136	A/C	FTO	other/GWAS	14836	0.322483	0.304	5.297e-08	3821	0.4303	0.06627	0.5537	780	0.2237	0.5381	0.1028	3833	0.1999	0.3786	0.0001294	3098	0.2789	0.4385	0.0004388	3304	0.4042	0.3584	0.001321
Alcohol (ever vs never) (Cases,n=7767/Controls,n=6721)
							Overall				African American				Native Hawaiian				Japanese American				Latino				European American
SNP	Chr	Position	SNP ID	A1/A2	Gene	Type	No. of samples	MAF	OR	P	No. of samples	MAF	OR	P	No. of samples	MAF	OR	P	No. of samples	MAF	OR	P	No. of samples	MAF	OR	P	No. of samples	MAF	OR	P
exm1037968	12	112241766	rs671	A/G	ALDH2	NS	14486	0.104672	0.262	6.317e-86	3734	0.0008009	0.8596	0.8761	771	0.1072	0.2389	1.529e-07	3741	0.2989	0.2265	2.065e-84	3026	0.001176	1.197	0.858	3214	0.003086	0.4867	0.3257
exm-rs11066015	12	112168009	rs11066015	A/G	ACAD10	other/GWAS	14486	0.104449	0.2625	1.73e-85	3734	0.0008009	0.4355	0.4962	771	0.1072	0.2389	1.529e-07	3741	0.2982	0.2285	1.504e-83	3026	0.001176	1.197	0.858	3214	0.003086	0.4867	0.3257
exm-rs3782886	12	112110489	rs3782886	G/A	BRAP	other/GWAS	14486	0.108764	0.3011	4.484e-77	3734	0.0008009	0.9516	0.9605	771	0.1096	0.2611	3.369e-07	3741	0.311	0.2644	8.622e-76	3026	0.001176	1.197	0.858	3214	0.003086	0.4867	0.3257
exm-rs11066280	12	112817783	rs11066280	A/T	C12orf51	other/GWAS	14484	0.110475	0.3105	9.151e-76	3734	0.002403	1.242	0.6597	771	0.1157	0.3117	1.908e-06	3741	0.3135	0.2639	2.94e-76	3026	0.001176	1.197	0.858	3212	0.003601	0.5046	0.3007
exm-rs2074356	12	112645401	rs2074356	T/C	C12orf51	other/GWAS	14486	0.0938848	0.2724	1.187e-75	3734	0.0008009	0.4355	0.4962	771	0.07831	0.1764	3.802e-07	3741	0.2716	0.2445	5.465e-74	3026	0.001176	1.197	0.858	3214	0.002058	0.4935	0.4558
exm-rs12229654	12	111414461	rs12229654	G/T	LOC100131138	other/GWAS	14486	0.0807915	0.3348	3.085e-53	3734	0.0008009	<<	0.9988	771	0.08313	0.3767	0.0003446	3741	0.2307	0.3029	8.792e-53	3026	0.0003918	7.753	0.1169	3214	0.002572	0.5086	0.4019
exm-rs2072134	12	113409176	rs2072134	T/C	OAS3	other/GWAS	14483	0.0665278	0.3829	1.7e-37	3734	0.0005339	<<	0.999	771	0.06265	0.3685	0.001237	3739	0.1915	0.359	1.413e-36	3025	0.0007837	0.8631	0.9112	3214	0.001029	1.299	0.8218
exm1036263	12	110390979	rs925368	C/T	GIT2	NS	14486	0.0428508	0.3771	2.146e-26	3734	0.0005339	<<	0.999	771	0.02771	0.3931	0.03325	3741	0.1252	0.3537	1.299e-26	3026	0.0003918	4.562	0.3114	3214	0.001543	<<	0.9988
exm1036124	12	110342598	rs74416240	A/G	TCHP	S	14486	0.0463473	0.4088	2.151e-25	3734	0.0005339	<<	0.999	771	0.03494	0.3678	0.01219	3741	0.1346	0.3874	2.602e-25	3026	0.0003918	4.562	0.3114	3214	0.001543	<<	0.9988
exm1037605	12	111993712	rs7969300	T/C	ATXN2	NS	14486	0.291846	0.8248	1.827e-08	3734	0.1143	1.049	0.5168	771	0.4916	0.7335	0.006862	3741	0.6199	0.6289	2.725e-19	3026	0.1371	1.152	0.07956	3214	0.0144	1.864	0.02144
Alcohol (natural log)
							Overall				African American				Native Hawaiian				Japanese American				Latino				European American
SNP	Chr	Position	SNP ID	A1/A2	Gene	Type	No. of samples	MAF	BETA	P	No. of samples	MAF	BETA	P	No. of samples	MAF	BETA	P	No. of samples	MAF	BETA	P	No. of samples	MAF	BETA	P	No. of samples	MAF	BETA	P
exm-rs3782886	12	112110489	rs3782886	G/A	BRAP	other/GWAS	7765	0.0287756	-0.4329	2.86e-08	1861	0.0005373	-0.2179	0.8638	356	0.0323	-0.1853	0.5294	1556	0.1339	-0.4719	2.169e-09	1750	0.0005714	-2.573	0.02351	2242	0.0006687	-2.365	0.008336
exm1037968	12	112241766	rs671	A/G	ALDH2	NS	7765	0.0243337	-0.4669	4.927e-08	1861	0.0005373	0.8247	0.4745	356	0.02949	-0.1124	0.7255	1556	0.1124	-0.5157	2.767e-09	1750	0.0005714	-2.573	0.02351	2242	0.0006687	-2.365	0.008336
exm-rs11066015	12	112168009	rs11066015	A/G	ACAD10	other/GWAS	7765	0.0243337	-0.4638	5.589e-08	1861	0.0002687	1.387	0.4179	356	0.02949	-0.1124	0.7255	1556	0.1127	-0.5069	4.276e-09	1750	0.0005714	-2.573	0.02351	2242	0.0006687	-2.365	0.008336
exm-rs11066280	12	112817783	rs11066280	A/T	C12orf51	other/GWAS	7763	0.029942	-0.4101	9.743e-08	1861	0.002418	-0.009303	0.986	356	0.04073	-0.1875	0.4868	1556	0.1352	-0.4711	2.755e-09	1750	0.0005714	-2.573	0.02351	2240	0.0008925	-1.404	0.07118
exm323010	3	52830527	rs115714636	G/A	ITIH3	NS	7765	0.00508562	-0.8768	2.911e-07	1861	0.02123	-0.8524	1.546e-06	356	0	NA	NA	1556	0	NA	NA	1750	0	NA	NA	2242	0	NA	NA
exm322673	3	52731828	rs115960994	T/C	GLT8D1	NS	7735	0.00439447	-0.8859	1.007e-06	1857	0.01831	-0.8521	5.655e-06	356	0	NA	NA	1541	0	NA	NA	1743	0	NA	NA	2238	0	NA	NA
exm-rs2074356	12	112645401	rs2074356	T/C	C12orf51	other/GWAS	7765	0.0218875	-0.4347	1.255e-06	1861	0.0002687	1.387	0.4179	356	0.01685	0.002421	0.9953	1556	0.1037	-0.4848	6.423e-08	1750	0.0005714	-2.573	0.02351	2242	0.0004458	-2.493	0.02337
exm-rs12229654	12	111414461	rs12229654	G/T	LOC100131138	other/GWAS	7765	0.0210506	-0.428	1.357e-06	1861	0	NA	NA	356	0.0323	-0.5267	0.08784	1556	0.09602	-0.4255	2.24e-06	1750	0.0005714	-2.573	0.02351	2242	0.0006687	-2.365	0.008336
exm878744	11	2439767	rs886277	T/C	TRPM5	NS	7763	0.466452	-0.1172	2.42e-06	1861	0.4062	-0.1791	0.0005364	356	0.3469	-0.05009	0.6648	1556	0.2855	0.04035	0.4766	1750	0.5237	-0.1108	0.03418	2240	0.6165	-0.1804	5.731e-05
exm1256869	16	72130103	rs35794819	G/C	DHX38	NS	7760	0.00985571	0.5512	5.488e-06	1860	0.006452	0.4437	0.1642	356	0.001404	1.199	0.3828	1555	0	NA	NA	1749	0.008576	0.9378	0.0004148	2240	0.02187	0.4156	0.005987
PSA (natural log)
							Overall				African American				Native Hawaiian				Japanese American				Latino				European American
SNP	Chr	Position	SNP ID	A1/A2	Gene	Type	No. of samples	MAF	BETA	P	No. of samples	MAF	BETA	P	No. of samples	MAF	BETA	P	No. of samples	MAF	BETA	P	No. of samples	MAF	BETA	P	No. of samples	MAF	BETA	P
exm1410204	19	4552446	NA	A/G	SEMA6B	NS	2826	0.000353857	3.768	3.795e-09	759	0.001318	3.782	4.868e-08	136	0	NA	NA	773	0	NA	NA	632	0	NA	NA	526	0	NA	NA
exm1495645	19	51361757	rs17632542	C/T	KLK3	NS	2826	0.0242392	-0.4588	9.952e-09	759	0.01581	-0.009994	0.9616	136	0.01103	-1.003	0.05133	773	0.0006468	-4.53	3.445e-06	632	0.03244	-0.4372	0.004139	526	0.06464	-0.5312	1.374e-06
exm-rs266849	19	51349090	rs266849	G/A	KLK3	other/GWAS	2823	0.238576	-0.1636	1.68e-08	758	0.1168	-0.0508	0.5127	136	0.5037	-0.1644	0.1394	771	0.3632	-0.1565	0.0003019	632	0.2318	-0.1323	0.03076	526	0.1711	-0.3457	1.525e-06
exm1198551	16	774193	rs148595483	T/G	CCDC78	NS	2826	0.000530786	-2.913	2.401e-08	759	0.0006588	-1.919	0.05243	136	0	NA	NA	773	0	NA	NA	632	0.0007911	-3.41	0.0002138	526	0.0009506	-3.589	4.722e-05
exm-rs2735839	19	51364623	rs2735839	A/G	KLK3	other/GWAS	2825	0.290796	-0.1485	6.387e-08	758	0.2975	-0.02621	0.6372	136	0.4963	-0.2284	0.05555	773	0.3984	-0.2231	2.143e-07	632	0.2294	-0.07776	0.2244	526	0.1435	-0.2902	0.0001856
exm237741	2	166032837	rs139585434	A/G	SCN3A	NS	2822	0.000177179	-4.86	1.611e-07	759	0	NA	NA	136	0	NA	NA	771	0.0006485	-4.529	3.539e-06	631	0	NA	NA	525	0	NA	NA
exm63665	1	59042425	NA	A/C	TACSTD2	NS	2826	0.000176929	-4.856	1.628e-07	759	0	NA	NA	136	0	NA	NA	773	0.0006468	-4.53	3.445e-06	632	0	NA	NA	526	0	NA	NA
exm76096	1	94486905	rs61754056	T/C	ABCA4	NS	2826	0.000176929	-4.856	1.628e-07	759	0	NA	NA	136	0	NA	NA	773	0.0006468	-4.53	3.445e-06	632	0	NA	NA	526	0	NA	NA
exm2256994	5	1409938	rs115254960	A/G	SLC6A3	S	2826	0.000176929	-4.856	1.628e-07	759	0	NA	NA	136	0	NA	NA	773	0.0006468	-4.53	3.445e-06	632	0	NA	NA	526	0	NA	NA
exm487274	5	140603601	NA	G/A	PCDHB14	NS	2826	0.000176929	-4.856	1.628e-07	759	0	NA	NA	136	0	NA	NA	773	0.0006468	-4.53	3.445e-06	632	0	NA	NA	526	0	NA	NA
Free to Total PSA Ratio (natual log)
							Overall				African American				Native Hawaiian				Japanese American				Latino				European American
SNP	Chr	Position	SNP ID	A1/A2	Gene	Type	No. of samples	MAF	BETA	P	No. of samples	MAF	BETA	P	No. of samples	MAF	BETA	P	No. of samples	MAF	BETA	P	No. of samples	MAF	BETA	P	No. of samples	MAF	BETA	P
exm1495728	19	51381777	rs198977	T/C	KLK2	NS	2226	0.289308	0.1292	2.73e-20	602	0.4128	0.1204	1.255e-06	66	0.3258	0.07928	0.3549	665	0.2466	0.1537	7.506e-10	441	0.229	0.1146	0.001574	452	0.2412	0.1232	0.0001713
exm393211	4	25849141	rs139899954	A/C	SEL1L3	NS	2230	0.000672646	-1.179	1.164e-06	603	0.001658	-1.347	1.108e-05	66	0	NA	NA	667	0	NA	NA	442	0.001131	-0.8082	0.07214	452	0	NA	NA
exm609462	7	23299676	NA	T/C	GPNMB	NS	2230	0.00044843	-1.429	1.58e-06	603	0	NA	NA	66	0	NA	NA	667	0	NA	NA	442	0.001131	-1.629	0.0002514	452	0.001106	-1.084	0.01233
exm1649226	23	100117807	rs149219547	C/T	NOX1	NS	2230	0.00134529	-1.129	3.392e-06	603	0.004975	-1.193	1.918e-06	66	0	NA	NA	667	0	NA	NA	442	0	NA	NA	452	0	NA	NA
exm1087312	14	22133463	rs193176078	G/A	OR4E2	NS	2230	0.000672646	-1.089	7.264e-06	603	0	NA	NA	66	0	NA	NA	667	0	NA	NA	442	0	NA	NA	452	0.003319	-1.065	1.228e-05
exm2252534	16	27772891	rs9944296	T/C	KIAA0556	S	2230	0.00896861	-0.2973	9.825e-06	603	0.03068	-0.3198	9.386e-06	66	0	NA	NA	667	0	NA	NA	442	0.002262	0.2128	0.5082	452	0.001106	-0.09659	0.824
exm1078372	13	103710685	rs117447044	A/G	SLC10A2	NS	2229	0.000448632	-1.306	1.139e-05	602	0	NA	NA	66	0	NA	NA	667	0	NA	NA	442	0.002262	-1.244	7.765e-05	452	0	NA	NA
exm1201257	16	1391388	rs150730105	A/G	BAIAP3	NS	2230	0.000896861	-0.9163	1.427e-05	603	0.003317	-0.8605	8.171e-05	66	0	NA	NA	667	0	NA	NA	442	0	NA	NA	452	0	NA	NA
exm700365	8	52320669	NA	A/T	PXDNL	NS	2211	0.000226142	-1.801	1.827e-05	603	0.0008292	-1.781	3.938e-05	66	0	NA	NA	648	0	NA	NA	442	0	NA	NA	452	0	NA	NA
exm1843544	15	90190186	rs151155363	A/G	KIF7	NS	2230	0.000896861	-0.8992	1.838e-05	603	0	NA	NA	66	0	NA	NA	667	0.002249	-0.7495	0.001042	442	0.001131	-1.371	0.003237	452	0	NA	NA
A1/A2: minor allele/major allele
MAF: minor allele frequency in controls
NS: non-synonymous; S: synonymous; SP: splice site
Adjusted for age and the first 10 eigenvectors
